# Supplementary material for: Proteomic mapping of atrial and ventricular heart tissue in patients with aortic valve stenosis
Source: Springer Nature journal article supplement (doi:10.1038/s41598-021-03907-3), 2021-12-22
Supplement: MOESM1 [file 41598_2021_3907_MOESM1_ESM.pdf › 41598_2021_3907_MOESM1_ESM.pdf]

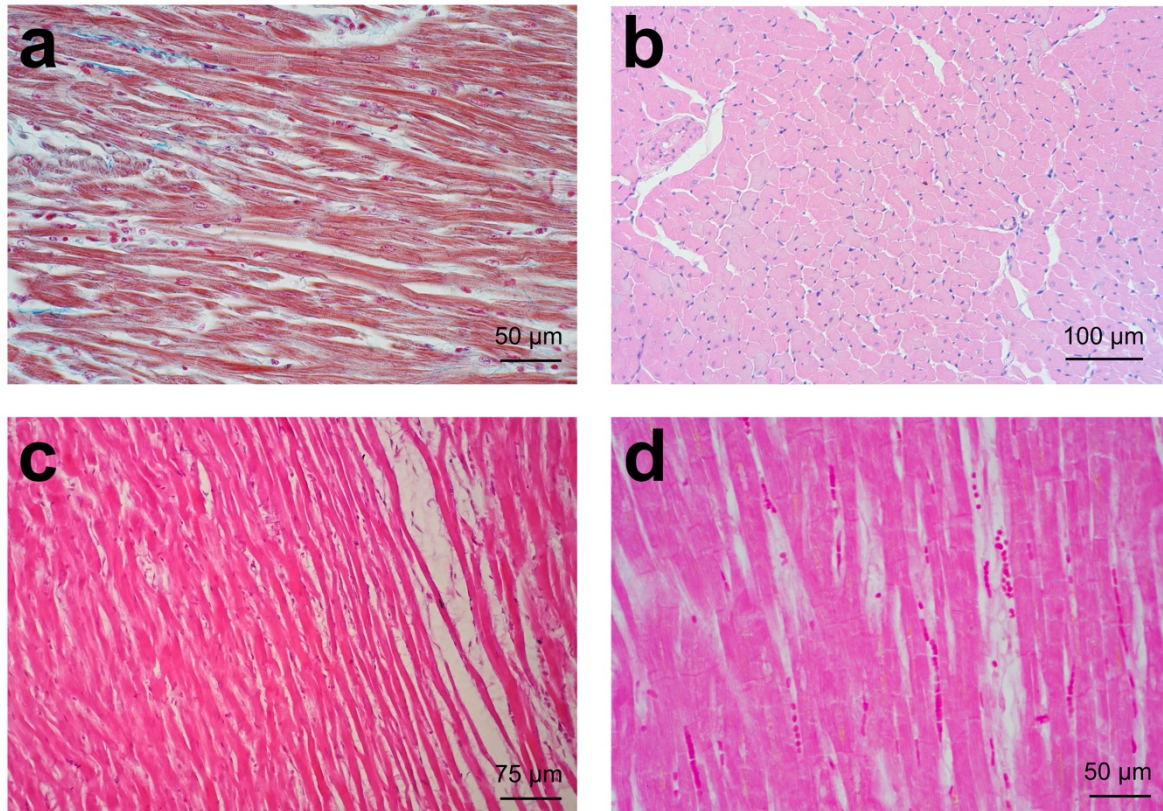

**Supplementary Figure 1. Histology of healthy human heart:**

In healthy ventricular myocardium most of the area is occupied by cardiomyocytes of normal size (cell diameter  $<20\mu\text{m}$ ), faint cross striations and large nuclei with one or two nucleoli and a delicate interstitium containing fibroblasts and capillaries lined by endothelial cells. The pictures shown were obtained from [www.shutterstock.com](http://www.shutterstock.com) and examined and validated by pathologists.
