# Supplementary material for: Proteomic mapping of atrial and ventricular heart tissue in patients with aortic valve stenosis
Source: Sci Rep. 2021 Dec 22;11:24389. doi: 10.1038/s41598-021-03907-3 (PMC8695579; doi:10.1038/s41598-021-03907-3)
Supplement: Supplementary file 4 — Supplementary Table 1. [file 41598_2021_3907_MOESM4_ESM.xlsx]

## Sheet: Legend
Supplementary Table 1 - Ratio values between FFPE tissue and SILAC standard.

## Sheet: Protein Expression Data
Gene name	Protein IDs	Protein name	01_ventricle	02_ventricle	02_atrium	03_ventricle	03_atrium	04_ventricle	04_atrium	05_ventricle	06_ventricle	07_ventricle	08_ventricle	08_atrium	09_ventricle	09_atrium	10_ventricle	11_ventricle	11_atrium	12_ventricle	13_ventricle	14_ventricle	15_ventricle	15_atrium	16_ventricle	17_ventricle	18_ventricle	19_ventricle	19_atrium	20_ventricle	20_atrium	21_ventricle	22_ventricle	22_atrium	23_atrium	24_ventricle	24_atrium	25_ventricle	25_atrium	26_ventricle	26_atrium	27_ventricle	28_ventricle	28_atrium	29_ventricle	29_atrium	30_ventricle	30_atrium
ND1;NDI;NADH1;MT-ND1;ndh1	Q14WI3;X2C0V4;A0A0N6W1Y9;A0A075XDP0;A0A075X7J5;A0A098CLD5;A0A098CK12;A0A0N6YNN2;Q8W9B1;A0A075X6R1;A0A075XDG3;A6ZHG8;Q4R1L7;V9N787;S5RP67;Q8WCX9;Q4F4Q9;L7P4B9;L7P4B8;J7HWH1;J7HR73;J7HLK4;J7HKC6;H9S4I5;H9P359;H9MYH0;H9MWB6;H9MSR8;H9MS34;H9MRT0;H9MRG3;H9MQG2;H9MQ71;H9MQ45;H9MPV4;H9MJW2;H9MJU9;G9LHL8;G9LB43;F6N878;A0A097PZK9;A0A097PZK0;A0A097PZ19;A0A097PX89;A0A097PWD6;A0A097PW36;A0A097PVV2;A0A097PVP0…	NADH-ubiquinone oxidoreductase chain 1	NaN	NaN	NaN	NaN	NaN	NaN	NaN	NaN	NaN	NaN	NaN	NaN	NaN	NaN	NaN	NaN	NaN	NaN	NaN	NaN	NaN	NaN	NaN	NaN	NaN	NaN	NaN	NaN	NaN	NaN	NaN	NaN	NaN	NaN	NaN	NaN	NaN	NaN	NaN	NaN	NaN	NaN	NaN	NaN	NaN	NaN
ND6;NADH6;MT-ND6	A0A0A0PZ76;A0A0A0PMV0;A0A0A0PWW8;A0A0A0PMJ8;A0A0A0PV27;A0A0A0PMS4;A0A0A0PVF3;X2C0J7;X2C0J3;X2C0I9;X2C0V5;X2C0I6;A0A0A0PXN1;A0A0A0PXR7;A0A0A0PYV6;A0A0A0PSE8;A0A0A0PWY2;A0A0A0PPX2;A0A0A0PU97;A0A0A0PRG6;A0A0A0PPE7;A0A0A0PPV1;X2CLX6;V9N931;V9M958;V9K2Q7;V9JR71;V9JDL3;V9JBQ6;V9J6I9;V9J4J6;V9J1G8;U5Z977;U5Z8L9;U3L5W2;T1Q6P2;T1Q6I5;T1Q524;R9Y8B2;Q9B302;Q9B2Y0;Q9B2U4;Q9B1K4;Q9B0M9;Q8WCX7;Q8HG31;Q8HG29;Q8…	NADH-ubiquinone oxidoreductase chain 6	NaN	NaN	NaN	NaN	NaN	NaN	NaN	NaN	NaN	NaN	NaN	NaN	NaN	NaN	NaN	NaN	NaN	NaN	NaN	NaN	NaN	NaN	NaN	NaN	NaN	NaN	NaN	NaN	NaN	NaN	NaN	NaN	NaN	NaN	NaN	NaN	NaN	NaN	NaN	NaN	NaN	NaN	NaN	NaN	NaN	NaN
ND4;ndh4;NADH4;MT-ND4	A0A075X8B5;H9E785;A0A059QSR8;A0A141ZSL4;A0A141ZQA8;Q1ZY32;X5CDJ3;X5BLB3;V9N9T2;V9N9H0;V9N518;V9JFH6;V9J5G3;V9J548;V9J0Z6;V9IZQ9;V5JGF7;U5ZDA5;U5YXJ5;U5YT86;U3LDR4;U3LCU1;U3L9L1;U3L8Y8;U3L8P3;U3L6U8;U3L6N6;U3L6H7;T2HMQ7;T1Q5B1;T1Q517;S5RPJ8;S5RLC1;S4UQT8;R9Y4Q4;R9Y4D9;R9Y457;R9Y323;R9Y2B9;R9Y0J8;Q9T9Y1;Q9B2Y7;Q9B2Y5;Q9B2X8;Q9B2X6;Q9B2W5;Q9B2W2;Q9B1S7;Q9B188;Q9B0T8;Q8WCZ0;Q8WCY0;Q8W8T1;Q8HNR0;Q8HG2…	NADH-ubiquinone oxidoreductase chain 4	-0.640086	-0.624381	-0.424788	-0.59957	-0.667144	-0.724996	-0.455123	-0.952259	-0.5521	-0.868952	0.312793	-0.185486	-0.293521	-0.0356576	-0.625708	NaN	0.222599	-0.731705	-0.88276	0.148239	0.46911	0.533827	0.17275	-0.589476	0.13035	0.356961	-0.146336	-0.23554	-0.00130833	0.169388	-0.197991	-0.587105	0.114785	0.0764531	0.0102942	0.529073	0.0996622	0.236861	0.166664	0.0284184	1.33112	-0.075877	0.347889	-0.208235	0.128456	-0.0709388
COX3;COIII;CO3;coxIII;MT-CO3	A0A075X871;A0A059QTG6;H9E795;A0A075X6R4;H9E7H3;H9E7J9;B4YCG0;T1Q6R9;T1Q5Q2;T1Q5P3;T1Q5B9;S4T6M3;Q9B2X0;Q9B2W9;Q9B2U6;Q9B1S6;Q9B1S4;Q8WCY1;Q8HNQ7;Q85L10;Q85L04;Q85KZ1;Q85KW2;Q85KW0;Q7YEF1;Q7YCF3;Q7YCE5;Q7YCE0;Q7YCC7;Q7Y664;Q6WQG6;Q6WQA1;Q6RRW7;Q6RPE6;Q6RMU0;Q6RLY3;Q6R0W6;Q6R0Q1;Q5SB31;Q5SAG0;Q4F2U0;Q4F2A8;Q4F1I5;Q4F0P9;Q4EZD1;Q4EXJ4;Q305X3;Q305K6;Q305I0;Q27H55;Q15IP0;Q15II8;Q0G899;I6N522;F1AKZ3;E0…	Cytochrome c oxidase subunit 3	-1.45847	-1.26081	-1.83786	-0.999639	NaN	NaN	-0.944709	-1.34319	-1.26125	NaN	-0.928106	-1.2528	NaN	-0.876216	NaN	-1.7414	-0.784169	-0.893906	-1.44607	-1.3636	-1.15719	-0.921189	-0.908866	-1.21537	-1.65681	-1.50208	-1.15744	NaN	NaN	-1.2042	-1.11403	-0.719753	-0.703106	-1.10789	-0.442652	-1.05711	-0.673781	NaN	-0.611732	-1.11814	-0.964371	-1.1183	-1.04875	-0.562957	-1.15747	NaN
ND3;NADH3;MT-ND3	A0A075XDK3;Q8HNR5;A6ZGZ8;A0A059RS30;A0A059RUV4;A0A059QPH2;E7E2P6;A0A075X768;G3CA53;A0A141ZSL2;A0A141ZQA6;A0A059QT02;H9E7H4;H9E7C2;A0A059QIM8;A0A141ZSJ9;A0A141ZRF9;O21102;H9E7V4;A0A059RBC5;H9E7R5;A0A059RP26;V9NA97;H9E783;A0A059R8S9;H9E796;H9E7Q2;A0A059RIY5;X5CFF7;X5CF60;X5BZL0;V9PAU6;V9N9E3;V9IWL9;U5ZAD9;U3KVH5;T1Q5E5;S5SA55;R9YBA6;R9Y638;R9Y4I0;R9Y3S3;Q9B0N2;Q9B0N1;Q8WCY4;Q8WCW0;Q8HG27;Q8HG26;Q7Y…	NADH-ubiquinone oxidoreductase chain 3	NaN	NaN	NaN	NaN	NaN	NaN	NaN	NaN	NaN	NaN	NaN	NaN	NaN	NaN	NaN	NaN	NaN	NaN	NaN	NaN	NaN	NaN	NaN	NaN	NaN	NaN	NaN	NaN	NaN	NaN	NaN	NaN	NaN	NaN	NaN	NaN	NaN	NaN	NaN	NaN	NaN	NaN	NaN	NaN	NaN	NaN
ATP8;atp8;ATPase 8;MT-ATP8	A0A075X6N5;A0A143FYJ4;A0A1B1PEP8;V9M714;V9JTG4;V5JPT0;U5YV54;T2HIA7;T1SWT3;Q9B1A3;Q8W8E1;Q85KW5;Q7YEE7;Q7YCG7;Q6RM58;Q6RLG0;Q5XTF0;Q5S8W6;Q5S8S7;Q4GUF2;Q4F675;Q4F196;Q3S937;Q3S924;Q0Z7D7;M1LM67;K9R3Q7;I3Q9B1;H9T6C8;H9T2R7;H9RZ55;H9PSV8;H6TVP0;G9LL05;G9LF90;F2WHR5;E7E463;E5DY52;E2DFE6;E1B2Y7;D6R613;D6C0Z2;D1GI26;D1G3X0;B8X5B2;B2XIJ9;A8JMT6;A8JL09;A6Z3V4;A6YTJ7;A4ZL69;A1DT13;A0SBU5;A0S208;A0A1B1PEM…	ATP synthase protein 8	NaN	NaN	-1.83216	NaN	NaN	NaN	NaN	NaN	NaN	NaN	0.213905	NaN	NaN	NaN	NaN	NaN	NaN	NaN	NaN	NaN	0.271583	NaN	-0.277866	NaN	NaN	NaN	NaN	NaN	NaN	NaN	NaN	NaN	NaN	NaN	NaN	-1.09936	NaN	NaN	NaN	-0.521453	0.245284	-0.666848	-0.533759	NaN	NaN	NaN
RBM8;RBM8A	A0A023T787;Q9Y5S9;A0A0J9YW13	RNA-binding protein 8A	NaN	NaN	NaN	NaN	NaN	NaN	NaN	NaN	NaN	NaN	NaN	NaN	NaN	NaN	NaN	NaN	NaN	NaN	NaN	NaN	NaN	NaN	NaN	NaN	NaN	NaN	NaN	NaN	NaN	NaN	NaN	NaN	NaN	NaN	NaN	NaN	NaN	NaN	-1.15737	NaN	NaN	NaN	NaN	NaN	NaN	NaN
TM9SF4	A0A0C4DFM1;A0A024QYR3;Q92544;B4DKC1;B4DYH6;B4DH88	Transmembrane 9 superfamily member 4	-0.391658	0.226983	NaN	-0.0972063	-1.89949	NaN	-0.240463	NaN	0.0441069	-0.45607	-0.249142	-0.0551957	0.107365	-0.233317	-0.96379	NaN	-1.67288	-0.348055	-0.342407	-0.430285	NaN	0.0097567	-0.419647	0.186202	NaN	NaN	-0.263155	NaN	-0.700433	-1.48091	-2.17811	-0.119821	-1.06942	-1.30064	-0.000721131	-0.395576	-0.844064	-1.04222	-0.929455	-0.695177	-1.67007	NaN	-2.30442	NaN	-0.866235	NaN
TM9SF2	B3KSG9;A0A024QYR8;Q99805	Transmembrane 9 superfamily member 2	2.00081	NaN	NaN	NaN	NaN	NaN	NaN	NaN	NaN	NaN	0.188348	1.29406	NaN	NaN	NaN	NaN	NaN	NaN	0.283035	NaN	NaN	NaN	0.975283	NaN	-0.214249	NaN	-0.493442	NaN	-0.164802	NaN	NaN	NaN	0.782198	NaN	NaN	NaN	NaN	NaN	-0.130302	0.0445831	-1.5158	NaN	NaN	NaN	NaN	NaN
SMBP;TM9SF3	Q96JZ5;A0A024QYS2;Q9HD45;Q5TB53;Q8WUB5	Transmembrane 9 superfamily member 3	NaN	NaN	1.73001	NaN	NaN	NaN	NaN	NaN	0.345968	NaN	NaN	NaN	-0.825786	NaN	NaN	NaN	1.06839	-0.795435	NaN	NaN	NaN	NaN	NaN	NaN	NaN	NaN	NaN	NaN	NaN	NaN	NaN	NaN	0.32896	NaN	NaN	NaN	NaN	NaN	0.369762	-1.1145	-1.61071	NaN	NaN	NaN	NaN	NaN
EIF3C;EIF3CL	B4DVQ5;A1KYQ7;A0A024QYU9;Q99613;B5ME19;B4DVU3;B4DDN4;B4DRU0;B4E2Z6;A0A024QYX7;B3KNZ4	Eukaryotic translation initiation factor 3 subunit C;Eukaryotic translation initiation factor 3 subunit C-like protein	1.59959	0.120564	0.802721	0.0266899	0.108007	-0.0901709	0.868279	0.704593	NaN	NaN	1.57091	0.972138	-0.350674	0.55353	0.347998	-0.41755	1.07936	-0.152531	1.23426	2.58888	0.861474	0.913421	0.776708	0.349456	0.204887	0.261715	0.105934	0.464816	0.468401	-0.263272	-0.0680263	2.14672	0.0205648	0.0170157	1.58406	-0.396699	2.0159	-0.0361405	1.04833	-0.602189	-0.515987	0.261511	-0.584224	-0.274449	-0.739539	-0.335308
PLP2	A0A024QYW3;Q04941	Proteolipid protein 2	NaN	NaN	NaN	NaN	NaN	NaN	NaN	NaN	NaN	NaN	NaN	NaN	NaN	NaN	NaN	NaN	NaN	NaN	NaN	NaN	NaN	NaN	NaN	NaN	NaN	NaN	NaN	NaN	NaN	NaN	NaN	NaN	NaN	NaN	NaN	NaN	NaN	NaN	NaN	NaN	NaN	NaN	NaN	NaN	NaN	NaN
EBP	A0A024QYX0;Q15125;C9J719;C9JJ78	3-beta-hydroxysteroid-Delta(8),Delta(7)-isomerase	NaN	NaN	NaN	NaN	0.0657478	-0.467697	NaN	0.0961286	-0.00374608	NaN	-2.08807	NaN	NaN	NaN	NaN	NaN	NaN	-1.14848	NaN	NaN	NaN	NaN	NaN	NaN	NaN	-1.57362	NaN	NaN	NaN	-1.01278	-1.60478	2.01514	NaN	NaN	-0.618145	-2.06798	NaN	NaN	-0.785006	NaN	-0.512783	-0.952259	NaN	NaN	NaN	NaN
PRPSAP2	B2R7R5;A0A024QYY3;O60256;I3L0S1;E7EPA1;C9K0K7;C9JJS3	Phosphoribosyl pyrophosphate synthase-associated protein 2	0.767167	0.0882241	0.196558	-0.29751	0.0298884	-0.586239	0.802738	-1.68138	NaN	0.156273	-0.725385	0.118962	-0.451859	-0.106214	0.200863	-0.567448	-0.273325	0.404918	-1.0283	0.492667	0.0169353	-0.58246	0.454486	-0.4962	-0.368377	-1.12134	0.306755	-1.15026	-0.537047	-0.186754	-0.457851	-0.461005	-0.827006	-0.731236	-0.696439	-0.864723	-0.248656	-0.79512	-0.792439	-0.913918	-2.47186	-1.13257	-0.894294	-0.785927	-1.37573	NaN
SEC61G	A0A024QYZ0;P60059	Protein transport protein Sec61 subunit gamma	NaN	NaN	NaN	NaN	NaN	NaN	NaN	NaN	NaN	NaN	NaN	NaN	NaN	NaN	NaN	NaN	NaN	NaN	NaN	NaN	NaN	NaN	NaN	NaN	NaN	NaN	NaN	NaN	NaN	NaN	NaN	NaN	NaN	NaN	NaN	NaN	NaN	NaN	NaN	NaN	NaN	NaN	NaN	NaN	NaN	NaN
EXOC3;DKFZp762K123	D6RB59;A0A024QYZ6;O60645;Q69YP2	Exocyst complex component 3	NaN	NaN	NaN	0.900664	NaN	0.331227	NaN	NaN	NaN	NaN	0.363457	NaN	NaN	NaN	NaN	NaN	NaN	NaN	NaN	NaN	NaN	NaN	0.446211	0.781975	NaN	NaN	NaN	-0.428035	NaN	NaN	NaN	NaN	NaN	-0.264116	NaN	NaN	NaN	NaN	NaN	NaN	NaN	NaN	NaN	NaN	NaN	NaN
CCDC22	A0A024QZ03;O60826;B7ZAR0;B4DPB6	Coiled-coil domain-containing protein 22	NaN	-0.0358298	NaN	NaN	-1.07676	-0.422556	-0.169056	-0.505644	NaN	-0.452637	-0.690583	-0.0846013	-1.77923	-1.371	-0.506072	NaN	0.0972395	NaN	-0.767358	-0.285618	NaN	NaN	NaN	NaN	-0.0648829	NaN	-0.0387926	NaN	NaN	-0.811471	NaN	-1.97107	1.15041	NaN	NaN	NaN	NaN	NaN	-0.766044	NaN	NaN	NaN	NaN	NaN	NaN	NaN
DKFZp566E044;HDAC6	B3KNA1;B4DZN1;Q9NSW6;A0A024QZ26;B4DZH6;Q9UBN7;B3KT76;Q9NZS3;A6NDI8;E7EPS2;B3KMC3;B3KVK5	Histone deacetylase 6	NaN	NaN	NaN	NaN	NaN	-2.05325	NaN	NaN	NaN	NaN	NaN	NaN	NaN	NaN	-0.902575	NaN	NaN	NaN	NaN	NaN	NaN	NaN	NaN	NaN	-0.542109	NaN	NaN	NaN	NaN	NaN	NaN	NaN	NaN	NaN	NaN	NaN	NaN	NaN	NaN	NaN	NaN	NaN	NaN	NaN	NaN	NaN
SDHA	A0A024QZ30;P31040;D6RFM5;B3KT34;A0A087X1I3;Q0QF12;B4DYN5	Succinate dehydrogenase [ubiquinone] flavoprotein subunit, mitochondrial	0.0177873	-0.0426651	0.226086	-0.353389	-0.49003	0.403852	0.15495	0.549926	-0.0637362	-0.11401	-0.287665	-0.716533	0.134466	-1.77059	-0.0130371	0.414631	-0.918166	0.407115	-0.423177	-0.426588	-0.0273125	0.014964	0.576184	-0.376518	0.45981	0.817862	-0.0168174	0.212794	-0.0821387	0.613536	0.339966	0.1772	0.290019	-0.252606	0.308489	0.443151	-0.0361538	0.129846	-0.158109	0.447087	0.659931	0.150107	0.556931	-0.0308663	0.502077	0.146508
MFAP4	A0A024QZ34;K7ES70;P55083	Microfibril-associated glycoprotein 4	NaN	NaN	NaN	NaN	NaN	NaN	NaN	NaN	NaN	NaN	NaN	NaN	NaN	NaN	NaN	NaN	NaN	NaN	NaN	NaN	NaN	NaN	NaN	NaN	NaN	NaN	NaN	NaN	NaN	NaN	NaN	NaN	NaN	NaN	NaN	NaN	NaN	NaN	NaN	NaN	NaN	NaN	NaN	NaN	NaN	NaN
INTS2	J3KMZ7;B4DQZ5;A0A024QZ48;Q9H0H0	Integrator complex subunit 2	NaN	NaN	NaN	NaN	NaN	NaN	NaN	NaN	NaN	NaN	NaN	NaN	NaN	NaN	NaN	NaN	NaN	NaN	NaN	NaN	NaN	NaN	NaN	NaN	NaN	NaN	NaN	NaN	NaN	NaN	NaN	0.34964	NaN	NaN	NaN	NaN	NaN	NaN	NaN	NaN	NaN	NaN	NaN	NaN	NaN	NaN
MYOM2	A0A024QZ61;P54296;E7EWH9;B4DNE9;A0A0J9YVV7	Myomesin-2	3.49615	4.09402	2.77745	3.91713	2.94067	2.66987	2.12841	3.33886	3.94575	3.70725	3.03396	2.332	3.60786	3.46292	4.25228	4.38452	2.57683	3.6239	2.12472	2.91097	2.83554	2.88265	3.91558	3.12597	3.05995	2.71071	3.06977	2.72788	2.60287	4.08094	2.83719	4.189	3.03424	3.11277	3.408	2.80596	3.44042	2.57832	3.76428	3.70273	4.63765	2.89891	2.28393	1.99464	3.64444	3.20418
hCG_1998851;FLOT2	A0A024QZ62;Q14254;Q6FG43;E7EMK3;J3QLD9;Q9BTI6;K7EKW9	Flotillin-2	-0.668568	-0.459801	-0.795678	-0.362095	-0.209549	-0.559993	-0.0871634	-0.367067	-0.634918	-0.193888	-0.142827	0.122542	-0.618017	-0.439004	-0.898715	-0.805654	-0.515356	-0.846575	-0.210669	-0.303409	-0.348923	-0.417624	-0.823585	-0.419379	-0.764078	-0.908655	-0.493142	-0.989432	-0.624357	-0.680163	-1.11644	-0.954867	-1.02542	-0.626213	-0.581296	-1.04154	-0.849799	-0.615786	-0.72276	-1.08424	-0.781341	-0.466274	-0.451521	0.206258	-0.281797	-0.6412
MYO18A;hCG_27198	A0A0D9SFK2;A0A024QZ63;Q92614;B4DZ32	Unconventional myosin-XVIIIa	-0.842093	-0.739488	-1.04992	-3.28009	-1.22033	-1.16692	-2.5855	-1.70621	-1.82605	-3.17895	-1.98854	-0.518264	-2.72617	-0.375643	-0.51147	-1.27781	-0.978566	-0.777366	-0.871952	-0.931429	-1.70929	-2.56688	-2.17766	-1.518	-1.50944	-2.44603	-1.08399	-0.983996	-0.927658	-1.25664	-0.758648	-0.772489	-0.776938	-1.08593	-0.962908	-1.51394	-0.680715	-0.972381	-0.911999	-1.56688	-1.41234	-1.36891	-1.46554	-1.22463	-2.18891	-1.18042
ALDOC	A0A024QZ64;P09972;B7Z3K9;B7Z1Y2;B7Z1N6;A8MVZ9;B7Z3K7;J3KSV6;J3QKP5;C9J8F3	Fructose-bisphosphate aldolase;Fructose-bisphosphate aldolase C	-1.2442	-0.584091	-0.288332	-1.89139	-5.26799	-1.41764	-1.05533	-2.18816	-1.06252	-1.33943	-1.47005	-0.986373	-1.25695	-1.33935	-1.10599	-1.56326	-0.895337	-1.635	-1.18997	-1.7806	-1.20472	-1.13947	-1.71856	-0.797497	-0.760746	-1.49706	-0.738249	-1.45946	-1.11411	-0.302251	-1.60763	-0.956213	-0.261437	-0.28593	-0.679901	-1.23791	-0.230736	-1.24223	-1.34503	-1.37184	-1.45777	-1.11038	-1.21485	-2.06141	-1.56931	-1.20045
RAB34	C9JBG0;Q96PJ7;C9JY26;Q6NXT3;A0A024QZ68;E7ES60;Q9BZG1;B4DNC0;K7EIF2;H7C0Y7	Ras-related protein Rab-34	NaN	NaN	NaN	NaN	NaN	NaN	NaN	NaN	NaN	NaN	NaN	NaN	NaN	NaN	NaN	NaN	NaN	NaN	NaN	NaN	NaN	NaN	NaN	NaN	NaN	NaN	NaN	NaN	NaN	NaN	NaN	NaN	NaN	NaN	NaN	NaN	NaN	NaN	0.0665634	NaN	NaN	NaN	NaN	NaN	NaN	NaN
TAOK1	A0A024QZ70;Q7L7X3	Serine/threonine-protein kinase TAO1	NaN	-0.302407	NaN	NaN	NaN	NaN	NaN	NaN	NaN	NaN	NaN	NaN	0.626023	NaN	NaN	0.0736969	NaN	NaN	NaN	NaN	NaN	NaN	NaN	NaN	NaN	NaN	NaN	NaN	NaN	-0.412836	NaN	NaN	NaN	NaN	NaN	NaN	NaN	NaN	NaN	NaN	NaN	NaN	NaN	NaN	NaN	NaN
EFHD2	A0A024QZ77;Q96C19;H0Y4Y4	EF-hand domain-containing protein D2	NaN	NaN	NaN	NaN	NaN	NaN	NaN	NaN	NaN	1.03198	2.2378	NaN	2.19502	NaN	NaN	NaN	NaN	NaN	NaN	-0.368824	NaN	NaN	NaN	NaN	NaN	NaN	NaN	NaN	NaN	NaN	NaN	NaN	NaN	NaN	NaN	NaN	NaN	NaN	NaN	-0.901726	NaN	NaN	NaN	NaN	NaN	NaN
EPHA2	A0A024QZA8;P29317;Q96HF4;B4DL04;B4DVT5	Receptor protein-tyrosine kinase;Ephrin type-A receptor 2	NaN	NaN	NaN	NaN	NaN	NaN	NaN	NaN	NaN	NaN	NaN	NaN	NaN	NaN	NaN	NaN	NaN	NaN	NaN	NaN	NaN	NaN	NaN	NaN	NaN	NaN	NaN	NaN	NaN	NaN	NaN	NaN	NaN	NaN	NaN	NaN	NaN	NaN	NaN	NaN	NaN	NaN	NaN	NaN	NaN	NaN
BCKDK	A0A024QZA9;O14874;H3BTL2;H3BS02;B4DGN9	[3-methyl-2-oxobutanoate dehydrogenase [lipoamide]] kinase, mitochondrial	NaN	NaN	NaN	NaN	NaN	NaN	NaN	NaN	NaN	NaN	NaN	NaN	NaN	NaN	NaN	NaN	NaN	NaN	NaN	NaN	NaN	NaN	-0.360083	NaN	NaN	NaN	NaN	NaN	NaN	NaN	NaN	NaN	0.0652631	NaN	NaN	NaN	NaN	NaN	-0.165044	NaN	NaN	NaN	NaN	NaN	NaN	NaN
CD2BP2	A0A024QZC1;O95400;Q5QTR6	CD2 antigen cytoplasmic tail-binding protein 2	NaN	NaN	NaN	NaN	NaN	NaN	NaN	NaN	NaN	NaN	NaN	NaN	NaN	NaN	NaN	NaN	NaN	NaN	NaN	NaN	NaN	NaN	NaN	NaN	NaN	NaN	NaN	NaN	NaN	NaN	NaN	NaN	NaN	NaN	NaN	NaN	NaN	NaN	NaN	NaN	NaN	NaN	NaN	NaN	NaN	NaN
RPL18	Q0QEW2;H0YHA7;A0A024QZD1;J3QQ67;Q07020;G3V203;F8VUA6;F8VYV2;B4DDY5;A0A075B7A0	60S ribosomal protein L18	-0.389286	0.0883509	-0.231795	-0.0311	0.0390885	-0.163576	0.198142	-0.250942	-0.0670394	0.175004	0.0681914	0.386907	-0.0966095	-0.266759	-0.0764204	-0.043665	0.461691	-0.0954189	0.113064	-0.17816	-0.263888	0.014266	0.152122	-0.286617	-0.371477	-0.393822	0.285173	-0.447839	-0.29253	0.000398681	-0.109923	-0.180187	0.277185	-0.326653	-0.0503111	-0.429685	0.13071	-0.526557	0.262453	-0.166225	-0.187866	-0.00620675	-0.421985	-0.509217	-0.68188	-0.076669
SNRP70;SNRNP70	A0A024QZD5;P08621;A8KAQ5;M0QYR1	U1 small nuclear ribonucleoprotein 70 kDa	-0.156242	-0.0852063	-0.0353506	-0.487601	-2.02274	0.577702	1.78622	-0.0784436	0.730836	-0.888943	0.23836	0.554616	-0.255113	-0.10017	-0.221818	-0.995917	0.898252	1.45221	-0.542094	-0.600875	0.531837	-0.100696	-0.944318	-0.426578	-1.08609	-1.15697	-0.623029	-0.25373	-1.17368	-1.15456	-1.53708	-0.0815553	-0.531655	-1.26012	0.65215	-1.18603	-3.175	-1.25332	-1.16803	-1.4865	-0.190397	-0.459993	-0.120086	-0.628881	-1.28268	-0.185391
C16orf58	B4E381;H3BR29;H3BSM7;A0A024QZE6;Q96GQ5;B4DJP2	RUS1 family protein C16orf58	NaN	NaN	NaN	0.680359	3.64767	NaN	NaN	NaN	NaN	NaN	NaN	NaN	NaN	NaN	NaN	NaN	NaN	NaN	NaN	NaN	NaN	NaN	NaN	NaN	NaN	NaN	NaN	NaN	NaN	NaN	NaN	NaN	NaN	NaN	NaN	NaN	NaN	NaN	NaN	NaN	NaN	NaN	NaN	NaN	NaN	NaN
hCG_19665;NUP62	A0A024QZF1;P37198;M0QXN5	Nuclear pore glycoprotein p62	-0.934781	-0.855033	NaN	NaN	NaN	NaN	NaN	NaN	-0.335598	NaN	NaN	NaN	-0.219091	NaN	NaN	NaN	NaN	NaN	NaN	NaN	NaN	NaN	NaN	NaN	NaN	NaN	-1.04236	NaN	NaN	NaN	NaN	NaN	NaN	NaN	NaN	NaN	NaN	NaN	NaN	NaN	NaN	NaN	NaN	NaN	NaN	NaN
RRAS	A0A024QZF2;P10301	Ras-related protein R-Ras	-0.00244894	0.495112	0.106591	0.34688	0.130671	0.312613	0.198126	0.789051	0.386815	0.383687	0.124689	-0.0971275	0.0562522	0.115772	0.313838	0.326359	-0.152497	0.111512	0.169069	-0.155503	0.0810801	0.0525668	-0.199242	0.364373	0.267721	0.675641	-0.373438	-0.294565	-0.0656122	-0.0354461	-0.188823	-0.0196116	-0.148239	0.0845156	0.359989	0.319697	0.604347	0.622449	-0.201802	0.774579	0.5513	0.0964766	0.334494	0.561731	0.133446	0.461431
AKT1S1	A0A024QZF6;Q96B36;M0R2V8;H9KV91	Proline-rich AKT1 substrate 1	NaN	NaN	NaN	NaN	NaN	NaN	NaN	NaN	NaN	NaN	NaN	NaN	NaN	NaN	NaN	NaN	NaN	NaN	NaN	NaN	NaN	NaN	NaN	NaN	NaN	NaN	NaN	NaN	NaN	NaN	NaN	NaN	NaN	NaN	NaN	NaN	NaN	NaN	NaN	NaN	NaN	NaN	NaN	NaN	NaN	NaN
RNF40	H3BP71;A0A0S2Z537;A0A024QZG0;O75150;A0A0S2Z4Z2;A8K6K1;Q6ZN99	E3 ubiquitin-protein ligase BRE1B	NaN	NaN	NaN	NaN	3.14344	NaN	3.65047	NaN	NaN	NaN	3.10457	2.73437	3.14816	3.33503	NaN	NaN	NaN	NaN	2.82664	NaN	NaN	NaN	NaN	-2.01318	NaN	NaN	NaN	0.462614	NaN	NaN	-0.222557	1.84073	-0.187388	NaN	NaN	NaN	NaN	NaN	NaN	NaN	NaN	NaN	NaN	NaN	NaN	NaN
SR-A1;SCAF1	A0A024QZH6;Q9H7N4	Splicing factor, arginine/serine-rich 19	NaN	NaN	NaN	NaN	NaN	NaN	NaN	NaN	NaN	NaN	NaN	NaN	NaN	NaN	NaN	NaN	NaN	NaN	NaN	NaN	NaN	NaN	NaN	NaN	NaN	NaN	NaN	NaN	NaN	NaN	NaN	NaN	NaN	NaN	NaN	NaN	NaN	NaN	NaN	NaN	NaN	NaN	NaN	NaN	NaN	NaN
MYH11	A0A024QZJ6;A0A024QZJ4;B1PS43;P35749;Q7Z7R0	Myosin-11	0.336128	0.0274203	0.499678	0.32018	-0.358059	NaN	0.838099	-0.766726	-0.0593139	0.0505635	-0.791189	0.533339	-0.150391	0.635966	-0.669108	1.43209	-0.154414	-0.406019	-0.122739	-1.08604	NaN	1.69143	-0.444176	2.66292	1.03479	0.682369	0.472413	0.693342	1.01263	0.691506	-0.475314	0.010063	-0.537954	0.527741	0.68506	0.505308	1.24984	1.68413	-0.714575	1.65426	2.41097	0.0796609	0.330882	1.99603	0.292723	0.797609
CCDC6	Q05CP8;A0A024QZJ7;Q16204	Coiled-coil domain-containing protein 6	-0.650412	0.208179	-1.32786	-0.766549	-1.04788	-0.675959	0.114671	-1.24272	-0.850284	-0.732234	0.0673168	0.0571943	-0.0298702	-0.781759	-0.72928	-1.33651	0.166527	-0.03853	-0.71144	-0.702656	NaN	-1.1411	-0.240448	-0.127243	-0.62746	-0.802542	-0.68907	-1.43935	-0.308033	-0.832933	-0.216105	-0.580979	-0.232286	-0.178116	-0.316275	-1.55533	-0.00561566	-1.41589	-1.08352	-0.892173	0.238049	NaN	-0.0698396	-1.41267	NaN	NaN
HK1	B4DG62;A8K7J7;A0A024QZK7;Q59FD4;P19367;B3KRA9	Hexokinase;Hexokinase-1	NaN	NaN	NaN	NaN	NaN	NaN	NaN	NaN	NaN	NaN	NaN	NaN	NaN	NaN	NaN	NaN	NaN	NaN	NaN	NaN	NaN	NaN	NaN	NaN	NaN	NaN	1.37692	NaN	NaN	NaN	NaN	NaN	NaN	NaN	NaN	NaN	NaN	NaN	NaN	NaN	NaN	NaN	NaN	NaN	NaN	NaN
HNRPH3;HNRNPH3	Q53F48;A0A024QZK8;P31942;B4DHY1;A0A024QZP1	Heterogeneous nuclear ribonucleoprotein H3	-0.358426	0.240667	-0.613926	-0.209161	-0.408344	-1.88074	-1.01478	0.0532484	-0.403879	-0.894803	-0.49719	-0.333322	-0.370893	-0.579053	-0.116707	-1.58091	-1.50434	-1.73742	-2.48289	-1.1823	-1.15102	-0.670078	-0.856049	-1.03979	-1.20286	-1.10398	-0.276581	-1.13398	-0.528766	-0.504142	-1.02001	-0.444708	-0.559558	-0.650116	-0.683596	-1.24465	-0.45274	-0.728128	-0.662309	-2.08117	-0.691843	-0.455335	-1.21342	-0.64303	-2.34907	-0.577609
C10orf35	A0A024QZL0;Q96D05;Q5VVH9	Uncharacterized protein C10orf35	NaN	NaN	NaN	NaN	NaN	0.344172	NaN	NaN	NaN	NaN	NaN	1.17264	-0.381139	NaN	NaN	NaN	0.629568	-0.53456	NaN	NaN	NaN	NaN	NaN	NaN	NaN	NaN	NaN	NaN	NaN	NaN	NaN	NaN	NaN	NaN	NaN	NaN	NaN	NaN	NaN	NaN	NaN	NaN	NaN	NaN	NaN	NaN
LRRC20	X6RK58;A0A024QZM2;Q8TCA0;A0A0A0MS58;A0A024QZR0;A0A024QZL5	Leucine-rich repeat-containing protein 20	NaN	NaN	NaN	NaN	NaN	NaN	NaN	NaN	NaN	NaN	NaN	NaN	NaN	NaN	NaN	NaN	NaN	NaN	NaN	NaN	NaN	NaN	NaN	NaN	NaN	NaN	NaN	NaN	NaN	NaN	NaN	NaN	NaN	NaN	NaN	NaN	NaN	NaN	NaN	NaN	NaN	NaN	NaN	NaN	NaN	NaN
SEC24C	G5EA31;A0A024QZM6;P53992;B4DSN3	Protein transport protein Sec24C	-0.0372853	-0.491217	NaN	-1.26688	-0.584882	1.15849	1.25963	-2.15585	1.09176	-1.03464	0.284616	NaN	-0.841401	NaN	-1.71141	-0.918903	NaN	-0.872254	0.0641424	-1.6036	NaN	NaN	-0.546525	NaN	-1.95947	-0.579277	-1.29531	-0.630219	NaN	NaN	NaN	-0.973579	-0.0910603	-1.09275	-0.57918	NaN	-0.156096	NaN	0.0849342	NaN	-0.387914	-0.792522	NaN	-0.220949	NaN	-0.781892
hCG_2024613;DNAJC9	A0A024QZN2;Q8WXX5	DnaJ homolog subfamily C member 9	NaN	NaN	NaN	NaN	1.21293	NaN	NaN	NaN	NaN	NaN	0.840477	0.814413	0.891348	1.62995	NaN	NaN	3.85782	0.655762	-0.212732	NaN	NaN	NaN	NaN	NaN	NaN	NaN	0.228047	NaN	NaN	NaN	NaN	NaN	NaN	NaN	NaN	NaN	NaN	-0.114634	NaN	NaN	NaN	NaN	NaN	NaN	NaN	NaN
VCL;HEL114	A0A024QZN4;V9HWK2;P18206;Q5JQ13	Vinculin	0.183195	-0.289154	-0.20218	-0.158067	-0.801483	0.0681807	-0.432086	0.356007	-0.182578	0.260706	-0.0372216	-0.504266	-0.396869	-0.920354	-0.438674	0.256081	-0.29502	-0.23811	0.279182	0.391656	0.159966	0.0393062	-0.0869051	0.154221	-0.0392911	0.232276	-0.0250196	0.147155	0.188859	0.170623	0.121682	-0.324963	-0.630937	0.283997	0.0773481	0.162124	-0.431219	0.374154	-0.236483	0.0578655	0.0721746	0.0206542	0.8132	0.391764	0.346795	0.31089
C10orf70;CISD1	A0A024QZN7;Q9NZ45	CDGSH iron-sulfur domain-containing protein 1	-0.452024	-0.157479	-0.563157	-0.252123	0.0608276	-0.785806	0.0240348	-0.679785	-0.220961	-0.180601	-0.1806	-0.32654	-0.108784	-0.223081	-0.389175	-0.674075	-0.402391	-0.193956	-0.435011	-0.328179	-0.0713745	-0.390664	-0.491058	-0.468213	-0.577017	-0.09508	-0.115921	-0.703468	-0.518882	-0.295706	-0.657977	-0.515143	0.0154602	-0.34843	-0.193287	-0.655349	-0.121565	-0.422609	-0.20163	-0.505505	-0.809261	-0.531561	-0.171924	-0.54097	-0.624805	-0.630564
HERC4	A8K9U4;A0A024QZN8;Q5GLZ8	Probable E3 ubiquitin-protein ligase HERC4	NaN	NaN	NaN	NaN	0.720541	NaN	NaN	NaN	NaN	NaN	1.66337	0.15242	NaN	NaN	NaN	NaN	NaN	NaN	NaN	NaN	NaN	NaN	0.500708	NaN	NaN	NaN	NaN	NaN	NaN	NaN	NaN	NaN	0.911017	NaN	NaN	NaN	NaN	NaN	1.68121	NaN	NaN	NaN	NaN	NaN	NaN	NaN
H2AFY2	A0A024QZP6;Q9P0M6;Q9HA11;Q5SQT3	Core histone macro-H2A;Core histone macro-H2A.2;Histone H2A	-0.458506	0.198511	-0.400194	-0.419151	-0.231364	-0.441898	0.0338343	-0.725646	-0.689613	-0.223566	-0.0357121	0.0105962	-0.18752	-0.132551	-0.186839	-0.849663	0.0164219	-0.0867383	-0.597395	-0.325786	-0.773252	-0.795059	-0.228429	-0.501811	-0.712706	-0.903979	0.0921635	-1.01435	-0.541581	-0.452007	-0.787296	-0.435809	-0.0946604	-0.366147	-0.510625	-0.61471	-0.265274	-0.51328	-0.357461	-0.762479	-0.153669	-0.221804	-1.01536	-0.47026	-0.702161	-0.470673
PSAP	Q53FJ5;A0A024QZQ2;C9JIZ6;Q59EN5;P07602;B4DEK5;B4DRB7;Q5BJH1	Prosaposin;Saposin-A;Saposin-B-Val;Saposin-B;Saposin-C;Saposin-D	-0.849075	-0.837813	-0.619609	-0.917382	-0.628033	-0.721549	-1.21956	0.0411285	-0.252478	-0.88203	-0.342715	-0.712809	-0.823805	-0.950095	-1.03992	-1.02408	-1.21698	-1.50169	-0.214868	-0.501375	-0.54577	-0.74938	-0.976064	-0.768545	-1.18966	-0.337407	-0.535798	-1.30951	-1.66349	-1.25069	-1.49419	-1.00942	-1.53796	-0.590374	-1.00342	-0.318465	-0.847752	-0.653822	-0.948209	-0.608003	-0.759984	-0.637513	-0.477388	-0.0466085	NaN	-1.73357
SYNPO2L	A0A024QZQ8;Q9H987	Synaptopodin 2-like protein	NaN	NaN	NaN	NaN	NaN	NaN	NaN	NaN	NaN	NaN	NaN	NaN	NaN	NaN	NaN	NaN	NaN	NaN	NaN	NaN	NaN	NaN	NaN	NaN	NaN	NaN	NaN	NaN	NaN	NaN	NaN	NaN	NaN	NaN	NaN	NaN	NaN	NaN	NaN	NaN	NaN	NaN	NaN	NaN	NaN	NaN
hCG_2002731;PELO	B3KPC1;A0A024QZR3;Q9BRX2	Protein pelota homolog	NaN	NaN	NaN	NaN	NaN	NaN	NaN	NaN	NaN	NaN	NaN	NaN	NaN	NaN	NaN	NaN	NaN	NaN	NaN	NaN	NaN	NaN	NaN	NaN	NaN	NaN	NaN	NaN	NaN	NaN	NaN	NaN	NaN	NaN	NaN	NaN	NaN	NaN	NaN	NaN	NaN	NaN	NaN	NaN	NaN	NaN
DKFZp586G1518;AP3M1	Q8NDP0;B4DRN6;A0A024QZR5;Q9Y2T2	AP-3 complex subunit mu-1	NaN	NaN	NaN	NaN	NaN	NaN	NaN	NaN	NaN	NaN	NaN	NaN	NaN	NaN	NaN	NaN	NaN	NaN	NaN	NaN	NaN	NaN	NaN	NaN	NaN	NaN	NaN	NaN	NaN	NaN	NaN	NaN	NaN	NaN	NaN	NaN	NaN	NaN	NaN	-0.776694	1.45981	NaN	NaN	NaN	NaN	NaN
MOCS2	A0A024QZS1;O96007	Molybdopterin synthase catalytic subunit	1.04928	NaN	NaN	NaN	NaN	NaN	NaN	NaN	NaN	NaN	NaN	NaN	NaN	NaN	NaN	NaN	NaN	NaN	NaN	NaN	NaN	NaN	NaN	NaN	NaN	NaN	NaN	NaN	NaN	NaN	0.519445	NaN	NaN	NaN	NaN	NaN	NaN	NaN	NaN	NaN	NaN	NaN	NaN	NaN	NaN	NaN
PPIF	B2R6X6;A0A024QZS4;P30405	Peptidyl-prolyl cis-trans isomerase;Peptidyl-prolyl cis-trans isomerase F, mitochondrial	-1.31517	-0.767625	-0.655831	-0.939475	-1.00987	-0.628791	-0.42664	-0.890108	-0.642349	-0.505569	-0.607863	0.0673404	-0.672898	-0.238429	-0.27657	-0.249088	-0.0198717	-0.535948	-1.40599	-0.0554597	-0.169208	-0.11781	-0.624519	-0.28826	-0.0663693	-0.274484	-0.686917	-0.803369	-0.47865	-0.442862	-0.256578	-0.377091	-0.370922	-0.554729	-0.690372	-0.992966	-0.368326	-0.61588	-1.87621	-1.15723	-0.152009	-0.878368	-0.261474	-0.66724	-0.861044	-0.570966
VDAC2	A0A024QZT0;P45880;A0A0A0MR02;A0A024QZN9;B4DKM5;Q5JSD1	Voltage-dependent anion-selective channel protein 2	-0.355171	0.067034	-0.67137	-0.066665	0.167411	-0.479561	-0.197964	-0.50002	-0.397465	-0.41659	-0.0463759	0.0115607	0.0324247	-0.00513345	-0.0500205	-0.550202	0.0298653	-0.146555	-0.372414	-0.405299	-0.742683	-0.424227	0.012386	-0.39627	-0.592635	-0.662657	-0.201162	-0.625038	-0.324703	-0.265515	-0.396139	-0.33225	-0.176789	-0.592617	-0.0510565	-0.661129	-0.509643	-0.431956	-0.0138834	-0.467575	-0.235238	-0.45222	-0.761577	0.0721708	-0.0499342	-0.129192
EXOC2	B3KPN7;A0A024QZT2;Q96KP1;B4DZI7	Exocyst complex component 2	-0.629566	0.630729	NaN	0.583623	1.30104	-0.030183	0.776348	NaN	0.678488	NaN	NaN	0.115566	0.723611	0.0245575	NaN	0.510026	NaN	0.530598	0.340331	-0.852603	-0.508936	-0.995304	0.774663	-0.068602	NaN	NaN	-0.0430369	-0.520749	-0.23382	-0.386038	-1.13007	-0.0192333	0.299521	-0.271187	-0.385376	-1.14838	-0.34958	-0.752663	-0.60241	-0.422233	-0.458907	NaN	-1.44551	-0.69439	NaN	NaN
SERPINB9;DKFZp686O07189	A0A024QZT4;P50453;Q6N0A8	Serpin B9	NaN	NaN	NaN	NaN	NaN	NaN	NaN	NaN	NaN	NaN	NaN	NaN	NaN	3.09678	NaN	NaN	NaN	NaN	1.86145	NaN	NaN	NaN	NaN	NaN	NaN	NaN	NaN	NaN	NaN	NaN	NaN	NaN	NaN	NaN	NaN	NaN	NaN	0.0831412	0.992001	NaN	NaN	NaN	NaN	NaN	NaN	NaN
NQO2	Q5TD07;B3KPX6;A0A024QZT9;P16083;Q5TD05;Q59EN2	Ribosyldihydronicotinamide dehydrogenase [quinone]	NaN	-0.0683042	NaN	-0.394075	-1.38427	-0.96414	-0.398713	-0.845189	-0.500006	-0.386157	-0.596267	-0.535854	-0.323658	-0.46196	NaN	-0.794525	-0.121811	-0.676043	-0.684739	-0.0342158	0.00862421	NaN	-0.966135	-0.278243	-0.972766	-1.31637	-0.0488856	-0.851946	-0.0288299	-0.22231	-0.187388	0.567922	-1.22836	0.080601	-0.53047	-0.038998	NaN	NaN	NaN	NaN	NaN	NaN	NaN	NaN	NaN	0.0490688
ECI2;PECI;HCA64	Q53HG3;Q53GC8;A0A0C4DGA2;A0A024QZU5;O75521;B4DLL3;Q59E94;Q9NYD2;F1LLU7;F8WAW4;C9JB63	Enoyl-CoA delta isomerase 2, mitochondrial	0.435624	0.755483	0.499907	0.665205	0.681705	0.892101	1.3204	1.20289	0.9849	1.0635	1.00764	1.10265	0.763762	1.13538	0.781538	1.45515	0.945235	1.15064	0.900609	0.413294	1.44912	1.7387	1.03247	0.897476	0.44976	1.75663	0.663295	1.26569	1.03403	1.08461	0.819898	0.998958	0.773595	0.781443	1.21603	1.79892	1.28503	1.04389	0.647198	1.22287	1.07819	0.669029	0.710734	0.826645	2.01254	0.678784
hCG_1811539;TXNDC5;STRF8;DKFZp666I134	A0A024QZV0;Q86UY0;Q6EHZ3;Q658S9;Q8NBS9	Thioredoxin domain-containing protein 5	-1.20958	0.188167	-1.3686	0.0920172	NaN	NaN	0.467623	NaN	NaN	0.934935	1.59022	NaN	NaN	0.606935	-0.601696	NaN	NaN	0.0554413	-0.349813	-0.10017	-0.4246	NaN	0.537424	-0.504875	NaN	-1.51551	2.28799	-1.5215	-0.445343	1.86591	-0.957023	1.90888	-0.687598	-1.06674	NaN	-1.12895	2.14944	1.67632	2.1346	-1.55988	-0.73312	-0.771549	-1.0049	0.17587	NaN	NaN
TPMT	Q9BS45;A0A024QZW0;P51580	Thiopurine S-methyltransferase	NaN	NaN	NaN	NaN	NaN	NaN	NaN	NaN	NaN	NaN	NaN	NaN	NaN	NaN	NaN	NaN	NaN	NaN	NaN	NaN	NaN	NaN	NaN	NaN	NaN	NaN	NaN	NaN	NaN	NaN	NaN	NaN	NaN	NaN	NaN	NaN	NaN	NaN	NaN	NaN	NaN	NaN	NaN	NaN	NaN	NaN
SERPINB6	A0A024QZX3;P35237;A0A024QZX5;A0A087X1N8;Q8IXH2	Serpin B6	0.226967	0.0342956	0.0188827	0.188046	-0.147552	-0.118614	0.447554	0.456458	-0.205913	0.106955	0.639412	0.407369	0.240272	0.285952	0.359092	-0.114971	-0.0908321	0.372501	-0.0141297	0.248338	0.458131	0.706653	0.451186	0.287038	0.282694	-0.120613	0.462818	-0.699036	0.0672009	-0.147878	0.0480957	0.538423	0.569768	0.0759012	0.37688	-0.440232	-0.00136671	0.354401	-0.0093584	-0.191055	-0.335309	0.117633	0.0699339	0.386444	-0.995784	-0.0547016
BPHL	A0A024QZY0;Q86WA6	Valacyclovir hydrolase	4.00666	NaN	NaN	NaN	-0.0781998	NaN	2.24962	NaN	NaN	NaN	4.09912	NaN	-0.188907	NaN	0.780463	NaN	4.50931	NaN	NaN	-0.0719	NaN	NaN	1.22412	NaN	NaN	2.3441	0.497507	NaN	NaN	NaN	NaN	NaN	NaN	NaN	NaN	NaN	NaN	NaN	1.32308	NaN	0.223913	NaN	NaN	NaN	NaN	-0.124857
JTV1;AIMP2	B2R7M3;A0A024QZY1;Q13155;A8MU58;F8W950	Aminoacyl tRNA synthase complex-interacting multifunctional protein 2	-1.12453	-0.852274	-0.935731	-1.00426	-0.613334	-1.11486	-1.32066	-0.714494	-0.635123	-1.13362	-0.765033	-1.01141	-0.696127	-1.20529	-1.51521	-0.961384	-0.171975	-1.67862	-0.779014	-0.369598	NaN	NaN	0.127494	-0.851382	-2.05266	-0.904902	-1.34418	-1.28882	-0.240463	-1.84671	-1.72282	-0.540452	-0.877936	-0.915054	-0.017272	-1.54062	0.139872	-1.2836	-1.10642	-1.40937	-0.933388	-0.678613	NaN	NaN	-1.14235	-0.839557
PRPF4B	B4DZQ5;A0A024QZY5;Q13523;H0YDJ3	Serine/threonine-protein kinase PRP4 homolog	NaN	NaN	NaN	NaN	NaN	NaN	NaN	NaN	NaN	NaN	NaN	NaN	NaN	NaN	NaN	NaN	NaN	NaN	NaN	NaN	NaN	NaN	1.00465	NaN	NaN	NaN	3.32427	NaN	NaN	NaN	NaN	NaN	4.18498	NaN	NaN	NaN	NaN	NaN	NaN	NaN	NaN	NaN	NaN	NaN	NaN	NaN
TMEM14C	Q53F27;A0A024R001;Q9P0S9	Transmembrane protein 14C	-1.24173	-1.77218	-2.38679	-2.39359	0.264563	NaN	NaN	-1.09493	NaN	-2.15539	-0.288297	-2.20727	-1.0924	-2.16353	-1.65179	NaN	0.34055	-2.16841	-2.34179	-1.38361	NaN	-0.40163	-1.18294	NaN	-2.12294	-1.03883	0.589116	-2.31164	-1.89371	-2.13337	-1.94178	-0.872702	-1.97243	NaN	-1.51753	-1.77997	NaN	NaN	-1.46053	NaN	NaN	NaN	-0.257131	NaN	NaN	NaN
ATXN1	A0A024R005;P54253	Ataxin-1	NaN	NaN	NaN	NaN	NaN	NaN	NaN	NaN	NaN	NaN	NaN	NaN	NaN	NaN	NaN	NaN	NaN	NaN	NaN	NaN	NaN	NaN	NaN	NaN	NaN	NaN	NaN	NaN	NaN	NaN	NaN	NaN	NaN	NaN	NaN	NaN	NaN	NaN	NaN	NaN	NaN	NaN	NaN	NaN	NaN	NaN
SIRT5	A0A024R012;Q9NXA8	NAD-dependent protein deacylase sirtuin-5, mitochondrial	NaN	0.861343	0.142704	NaN	NaN	NaN	NaN	-0.408712	0.75251	0.377294	1.01147	1.11923	NaN	NaN	0.222162	0.0861359	1.56738	0.396859	-0.628354	NaN	0.560154	1.05014	0.239634	-0.619836	0.0868292	-1.12664	NaN	-0.0901759	NaN	NaN	-0.328722	NaN	0.245694	NaN	0.0143102	NaN	NaN	NaN	NaN	-0.310573	NaN	NaN	NaN	NaN	NaN	NaN
HIST1H2AB;HIST1H2AC;HIST3H2A;HIST1H2AA	Q08AJ9;A0A024R017;Q93077;Q7L7L0;P04908;Q96QV6	Histone H2A;Histone H2A type 1-C;Histone H2A type 3;Histone H2A type 1-B/E;Histone H2A type 1-A	0.327812	-2.14537	-0.864614	-1.39192	-1.74505	NaN	0.168804	-0.715366	-0.822507	-1.22055	NaN	0.679203	-1.92608	-1.7348	-2.23266	-1.92943	-2.10716	-1.58032	NaN	NaN	NaN	-1.69569	-1.05485	NaN	-1.52685	-0.688672	-0.91514	-1.68961	-0.848819	-1.40073	NaN	-0.707007	-0.968175	-0.91173	-1.33692	NaN	-1.09756	NaN	-0.908583	NaN	NaN	NaN	NaN	0.57623	1.02876	-0.781275
C9	A0A024R035;P02748	Complement component C9;Complement component C9a;Complement component C9b	NaN	NaN	NaN	NaN	2.4877	NaN	NaN	NaN	NaN	NaN	4.5672	2.73078	NaN	2.20483	NaN	NaN	3.45788	1.48649	NaN	NaN	NaN	NaN	NaN	NaN	NaN	NaN	2.49989	NaN	1.31502	NaN	NaN	1.31595	NaN	NaN	-0.193456	NaN	3.62325	1.71449	NaN	NaN	NaN	NaN	2.93832	2.83733	NaN	NaN
OXCT1;OXCT	A0A024R040;P55809;Q6IAV5;E9PDW2;B7Z609	Succinyl-CoA:3-ketoacid-coenzyme A transferase;Succinyl-CoA:3-ketoacid coenzyme A transferase 1, mitochondrial	0.0782593	-0.13239	-0.311493	0.194678	-0.252789	0.179591	0.138203	0.13136	-0.322912	-0.28957	0.493685	0.0111333	-0.169879	-0.180818	0.0169161	0.355136	0.365299	-0.320738	0.095131	0.34365	0.192583	0.0255687	-0.253003	0.382209	0.500392	0.657788	-0.415949	0.346968	0.720492	0.77633	0.38618	0.0733295	0.0933303	0.357083	0.0555329	0.681188	0.266924	0.276535	-0.11745	0.764311	0.352191	0.391692	0.366892	0.398469	0.596461	0.297751
SLC1A3	B4DHC6;A0A087X0U3;B4DF14;A0A087WT87;Q8N169;A0A024R050;P43003	Amino acid transporter;Excitatory amino acid transporter 1	NaN	NaN	NaN	NaN	NaN	NaN	NaN	NaN	NaN	NaN	NaN	NaN	NaN	NaN	NaN	NaN	NaN	NaN	NaN	NaN	NaN	NaN	NaN	NaN	NaN	NaN	NaN	NaN	NaN	NaN	NaN	NaN	NaN	NaN	NaN	NaN	NaN	NaN	NaN	NaN	NaN	NaN	NaN	NaN	NaN	NaN
GNB1	B2R6K4;A0A024R056;P62873;F6UT28;B1AKQ8;F6X3N5	Guanine nucleotide-binding protein G(I)/G(S)/G(T) subunit beta-1	-2.6093	-2.52415	-2.4963	-1.40432	-2.37367	-1.39656	-0.470209	-1.33864	-0.446451	-0.860704	-0.283485	-0.622494	-0.809579	-1.14326	-1.23457	-1.08138	-0.601677	-5.10701	-0.957861	-0.932059	-0.0854467	-2.46625	-0.365546	-1.93243	-1.68197	-2.52054	-0.715496	-3.09113	-0.458306	-1.69132	-1.34602	-0.00195506	-1.38087	-1.09655	-2.15699	-3.03341	-2.28467	-3.39712	-1.10016	-0.623683	-2.02406	-0.566403	-2.69345	-0.760478	-1.52754	-0.199207
HMGCS1	Q8N995;A0A024R059;Q01581	Hydroxymethylglutaryl-CoA synthase, cytoplasmic	NaN	NaN	NaN	NaN	NaN	NaN	NaN	NaN	NaN	NaN	NaN	NaN	NaN	NaN	NaN	NaN	NaN	NaN	NaN	NaN	NaN	NaN	NaN	NaN	NaN	NaN	NaN	NaN	NaN	NaN	NaN	NaN	NaN	NaN	NaN	NaN	NaN	NaN	NaN	NaN	NaN	NaN	NaN	NaN	NaN	NaN
NUP155	E9PF10;B4DLT2;A0A024R071;O75694	Nuclear pore complex protein Nup155	NaN	1.40932	NaN	0.674293	0.799772	0.112796	0.848817	0.30522	0.215732	-0.280956	0.202663	NaN	0.931782	0.697512	-0.361881	0.0363805	0.907522	0.644803	0.411251	-0.901263	NaN	NaN	0.665253	0.28148	-0.656451	0.0267487	NaN	-0.463204	1.03327	-0.770279	0.0300208	3.33727	-0.0754641	-0.262914	0.0494152	NaN	2.28026	-0.139862	0.660908	-0.720891	NaN	NaN	0.382288	NaN	NaN	NaN
SDF4	A0A024R084;Q9BRK5;H0Y3T6;G3V1E2;A0A024R0A9	45 kDa calcium-binding protein	NaN	NaN	NaN	NaN	NaN	NaN	NaN	NaN	NaN	NaN	NaN	NaN	NaN	NaN	NaN	NaN	NaN	NaN	NaN	NaN	NaN	NaN	NaN	NaN	NaN	NaN	NaN	NaN	NaN	NaN	NaN	NaN	NaN	NaN	NaN	NaN	NaN	NaN	NaN	NaN	NaN	NaN	NaN	NaN	NaN	NaN
AMPD2	H0Y360;B2RB47;A0A024R098;Q01433;E9PIJ1;E9PJF6;H0YCL9	AMP deaminase 2	NaN	NaN	NaN	NaN	NaN	NaN	NaN	NaN	NaN	NaN	NaN	NaN	NaN	NaN	NaN	NaN	NaN	NaN	-1.31394	NaN	NaN	NaN	NaN	NaN	NaN	NaN	NaN	NaN	NaN	NaN	NaN	NaN	NaN	NaN	NaN	NaN	NaN	NaN	NaN	NaN	NaN	NaN	NaN	NaN	NaN	NaN
NNT	Q2TB59;A0A024R0C3;Q13423	NAD(P) transhydrogenase, mitochondrial	-0.132516	0.0597813	0.0153612	-0.149637	-0.00764276	0.194711	0.0533874	-0.0666322	-0.36614	-0.0702448	-0.12065	-0.24523	-0.17377	-0.100551	-0.011669	0.0988902	-0.307128	0.1321	-0.0703671	-0.271432	0.0154181	-0.228707	0.0991608	0.0854822	0.103751	0.398864	-0.101643	0.109561	0.00420807	0.326736	0.0396325	-0.0696353	0.0534489	0.0810042	-0.0146028	0.592645	0.263736	0.295202	0.213012	0.542392	0.61166	0.289513	0.603748	0.123796	0.795438	0.0715025
CSDE1;UNR	Q9GZV0;A0A024R0K2;A0A024R0E2;O75534;Q96L66;E9PLT0	Cold shock domain-containing protein E1	-0.895147	NaN	0.225261	-0.266113	0.814768	0.227916	-0.123269	-0.234992	-1.07066	-0.854623	0.319993	0.150652	-1.13645	0.394177	-0.390952	-1.19919	-0.939214	-0.658509	0.560026	0.61297	NaN	NaN	-1.78564	-0.678511	NaN	-0.894803	-0.344107	-0.476019	-0.594262	-0.780852	-0.630706	-0.546695	-0.0848807	0.0582405	-0.993783	-0.349365	-0.607484	NaN	-0.718877	-0.827256	0.515501	0.0237	NaN	NaN	-1.10414	NaN
CAPZA1	A0A024R0E5;P52907;A8K0T9	F-actin-capping protein subunit alpha-1	0.0209712	-0.350379	0.146709	0.739181	0.5936	0.617048	1.52457	-0.4411	-1.06454	2.37712	0.969269	0.327582	-0.484807	0.372131	0.666669	-0.572873	-0.0232493	-0.14242	-0.146909	0.22597	0.281834	2.21748	0.134914	-0.566436	0.965067	-1.18619	-0.580854	-1.23688	0.33525	0.403559	-0.345425	-0.854017	-0.523257	0.847561	-1.15837	-0.274015	0.747366	-0.357402	-1.01696	-0.670682	-0.517735	-0.112244	-0.928945	-0.243922	-0.582361	-1.31185
TRIM33	H0Y612;A0A024R0F6;Q9UPN9;B3KN30	E3 ubiquitin-protein ligase TRIM33	NaN	NaN	NaN	NaN	NaN	NaN	NaN	NaN	NaN	NaN	NaN	NaN	NaN	NaN	NaN	NaN	NaN	NaN	NaN	NaN	NaN	NaN	NaN	NaN	NaN	NaN	NaN	NaN	NaN	0.0384359	NaN	NaN	NaN	NaN	NaN	NaN	NaN	NaN	NaN	NaN	NaN	NaN	NaN	NaN	NaN	NaN
CLCC1	A0A024R0G0;Q96S66;A0A024R095	Chloride channel CLIC-like protein 1	0.948813	0.868463	0.853165	3.28532	2.38823	NaN	2.73581	1.87028	NaN	NaN	NaN	1.18413	1.63866	1.72194	NaN	NaN	2.04799	1.27992	NaN	NaN	NaN	NaN	NaN	NaN	NaN	0.563241	1.76894	NaN	NaN	1.11113	NaN	-0.297133	1.4	0.518763	1.08045	NaN	NaN	NaN	1.17477	NaN	1.4663	NaN	0.688404	NaN	NaN	NaN
MRPS12	A0A024R0H2;O15235	28S ribosomal protein S12, mitochondrial	NaN	NaN	NaN	NaN	NaN	NaN	NaN	NaN	NaN	NaN	NaN	NaN	NaN	NaN	NaN	NaN	NaN	NaN	NaN	NaN	NaN	NaN	NaN	NaN	NaN	NaN	NaN	NaN	NaN	NaN	NaN	NaN	NaN	NaN	NaN	NaN	NaN	NaN	NaN	NaN	NaN	NaN	NaN	NaN	NaN	NaN
PAF1	A0A024R0H6;Q8N7H5	RNA polymerase II-associated factor 1 homolog	NaN	NaN	NaN	NaN	NaN	NaN	NaN	NaN	NaN	NaN	NaN	NaN	NaN	NaN	NaN	NaN	NaN	NaN	NaN	NaN	NaN	NaN	NaN	NaN	NaN	NaN	NaN	NaN	NaN	NaN	NaN	NaN	NaN	NaN	NaN	NaN	NaN	NaN	NaN	NaN	NaN	NaN	NaN	NaN	NaN	NaN
WDR77	A0A024R0H7;Q9BQA1;H0Y711	Methylosome protein 50	0.999783	NaN	0.491855	-0.00619028	NaN	-0.270828	NaN	0.0644558	1.0598	NaN	1.01403	-0.0504668	1.01211	NaN	0.278029	NaN	1.18177	NaN	-0.15946	0.0553965	-0.394075	0.654899	0.709552	0.0418329	0.0838003	0.157241	NaN	NaN	-0.192983	-0.487383	NaN	NaN	NaN	0.183425	NaN	-0.18053	0.825824	NaN	0.10629	NaN	NaN	NaN	NaN	NaN	NaN	NaN
DYRK1B;DYRK1A	B3KQI0;A0A024R0I0;Q9Y463;B4DXU2;A0A024R0J6;A0A024R0M8;Q13627	Dual specificity tyrosine-phosphorylation-regulated kinase 1B;Dual specificity tyrosine-phosphorylation-regulated kinase 1A	NaN	NaN	NaN	NaN	NaN	NaN	NaN	NaN	NaN	NaN	NaN	NaN	NaN	NaN	NaN	NaN	NaN	NaN	NaN	NaN	NaN	NaN	NaN	NaN	NaN	NaN	NaN	NaN	NaN	NaN	NaN	NaN	NaN	NaN	NaN	NaN	NaN	NaN	NaN	NaN	NaN	NaN	NaN	NaN	NaN	NaN
RHOC;hCG_2043376;RHOA	Q5JR08;A0A024R0I3;P08134;E9PQH6;Q5JR07;C9JNR4;C9JX21;Q5JR05	Rho-related GTP-binding protein RhoC	-0.643949	-1.82232	-0.783499	-0.564037	-1.09099	NaN	NaN	NaN	-1.39336	NaN	-0.314643	NaN	0.382739	NaN	NaN	-2.32809	NaN	-0.818687	NaN	0.470609	-0.760759	NaN	-0.232906	NaN	NaN	-1.4248	-0.107125	-0.633664	0.495207	NaN	NaN	-0.822118	-1.202	NaN	-0.139646	-1.7817	-0.25703	-0.418244	-0.195319	NaN	-0.670062	-0.33163	-0.819567	NaN	NaN	-1.65493
PAK4	A0A024R0L8;A8K724;A0A024R0J1;O96013;B4E3B5;B4DE88;B4DUG0	Non-specific serine/threonine protein kinase;Serine/threonine-protein kinase PAK 4	NaN	NaN	NaN	NaN	NaN	NaN	NaN	NaN	NaN	NaN	NaN	NaN	NaN	NaN	NaN	NaN	NaN	NaN	NaN	NaN	NaN	NaN	NaN	NaN	NaN	NaN	3.6407	NaN	NaN	NaN	NaN	NaN	NaN	NaN	NaN	NaN	NaN	NaN	NaN	NaN	NaN	NaN	NaN	NaN	NaN	NaN
BCKDHA;DKFZp313C0640	Q59EI3;B2R8A9;A0A024R0K3;Q6ZSA3;F5H5P2;P12694;F5GXU9;Q658P7	2-oxoisovalerate dehydrogenase subunit alpha, mitochondrial	-0.051564	0.288727	0.0342319	-0.810737	0.564147	-0.646063	0.0328992	-1.23845	0.332904	-0.68714	0.401075	1.05361	0.0209645	-0.304022	-0.0372027	-0.299751	0.363066	0.0649224	0.435573	0.374038	0.329148	-0.0642707	0.193356	0.00755603	-0.14603	0.692928	0.248294	0.119683	0.0949071	0.109579	0.0393075	0.050033	0.285141	-0.223943	0.459059	0.139182	0.0221475	-0.467524	-0.194795	0.0716623	0.145472	-0.148606	-0.527393	-0.279806	-0.239557	-0.205527
DKFZp686D0638;GSK3A	Q68D16;A8MT37;A0A024R0L5;P49840;M0QYV0	Glycogen synthase kinase-3 alpha	NaN	NaN	NaN	NaN	NaN	NaN	NaN	NaN	NaN	NaN	NaN	NaN	NaN	NaN	NaN	NaN	NaN	NaN	NaN	NaN	NaN	NaN	NaN	NaN	NaN	NaN	NaN	NaN	NaN	NaN	NaN	NaN	NaN	NaN	NaN	NaN	NaN	NaN	NaN	NaN	NaN	NaN	NaN	NaN	NaN	NaN
PAFAH1B3	A0A024R0L6;Q15102;M0R389;M0R1K3	Platelet-activating factor acetylhydrolase IB subunit gamma	-0.853038	-1.22649	-1.04772	-0.793376	-1.13033	-1.27288	NaN	-0.93902	-2.09386	-0.703997	-0.817132	-0.927517	-0.603764	-0.565379	-0.603056	-0.839411	-0.791974	-1.10438	-0.592493	NaN	NaN	-0.800082	-0.910167	-1.14133	-0.702252	-1.21107	-0.510253	-1.74036	-1.08515	-0.723075	-1.37149	-0.758815	-1.34236	-0.576243	-0.929616	-0.564427	NaN	-1.33868	0.0713303	-0.74277	-1.61457	NaN	NaN	-1.36737	NaN	NaN
TIMM50	Q0VAB1;A0A024R0M6;Q3ZCQ8;M0R0C3;M0R2F8	Mitochondrial import inner membrane translocase subunit TIM50	-0.675095	-1.65492	-0.467179	-0.672693	-1.73399	-0.280044	-0.575409	-1.43422	-0.717889	-0.472993	1.02563	-0.255234	-0.533364	-0.184449	-1.27517	-1.90566	-0.328935	-0.371169	-0.352019	1.53794	-0.0164963	NaN	-0.899717	-0.718438	-1.88585	-1.82863	-0.511099	-1.18589	-0.791385	-1.50123	NaN	-1.68555	-1.19248	-2.40583	-1.33878	-1.1394	NaN	-1.96809	-0.836247	NaN	-0.0748864	0.945665	-1.90466	NaN	NaN	NaN
TOMM40	A0A024R0P9;O96008;K7EKG4;K7EJ57	Mitochondrial import receptor subunit TOM40 homolog	0.189259	0.515584	-0.612211	-0.00150204	0.415527	-0.186624	NaN	-1.03003	NaN	-0.13644	0.147282	1.08805	-0.11703	0.425656	0.512932	0.200448	0.869834	1.23361	-0.419599	-0.16592	-0.0960233	0.563099	-0.185606	0.0291287	-0.140036	-0.315274	0.11274	-0.0127359	-0.262177	0.101423	0.209777	-0.270523	-0.48211	-0.931113	0.171611	-0.680416	NaN	0.154811	-0.0982061	-0.824238	-0.234615	-0.182236	-1.2158	-0.313872	-0.626058	NaN
PLD3	A0A024R0Q4;Q8IV08;B4DEL6	Phospholipase D3	0.512975	0.730417	NaN	-0.447246	0.643143	-1.04969	NaN	-0.0745054	1.07016	0.269512	NaN	NaN	NaN	1.39104	0.441928	-0.0559706	1.2796	0.338834	-1.45639	NaN	NaN	NaN	-0.308726	NaN	-1.06371	-0.206581	NaN	-0.817951	-1.32297	0.336487	NaN	NaN	NaN	NaN	NaN	NaN	NaN	NaN	NaN	-1.25238	NaN	NaN	NaN	NaN	NaN	NaN
PPP1R13L	A0A024R0Q5;Q8WUF5;A7YME7	RelA-associated inhibitor	NaN	NaN	NaN	NaN	NaN	NaN	NaN	NaN	NaN	NaN	NaN	NaN	NaN	NaN	NaN	NaN	NaN	NaN	NaN	NaN	NaN	NaN	NaN	NaN	NaN	NaN	NaN	NaN	NaN	NaN	NaN	NaN	NaN	NaN	NaN	NaN	NaN	NaN	NaN	NaN	NaN	NaN	NaN	NaN	NaN	NaN
PPP5C	Q9BPW0;H0YDU8;Q53FR0;A0A024R0Q7;P53041;B4DLP6;B2R6R6;A8MU39;B4DDZ8	Serine/threonine-protein phosphatase;Serine/threonine-protein phosphatase 5	-0.0203421	-0.0475383	0.179594	0.659221	0.480156	0.0115443	NaN	-0.150129	-0.698041	0.374068	0.520004	-1.3421	NaN	0.388242	0.411138	-0.530064	-0.00854255	NaN	0.669975	0.706677	NaN	NaN	0.0199474	NaN	-0.534958	NaN	0.374655	0.162609	-0.385707	NaN	-0.819668	NaN	NaN	NaN	0.319442	1.01651	NaN	NaN	-0.895923	NaN	0.693318	4.13908	NaN	0.545601	NaN	-0.255924
SAE1	A0A024R0R4;Q9UBE0;M0QZS6;B3KNJ4;M0QX65	SUMO-activating enzyme subunit 1;SUMO-activating enzyme subunit 1, N-terminally processed	NaN	0.141207	NaN	NaN	NaN	NaN	NaN	NaN	NaN	NaN	NaN	NaN	NaN	NaN	NaN	NaN	NaN	NaN	NaN	NaN	NaN	NaN	NaN	NaN	NaN	NaN	NaN	NaN	NaN	NaN	NaN	NaN	NaN	NaN	NaN	NaN	NaN	NaN	NaN	NaN	NaN	NaN	NaN	NaN	NaN	NaN
SYMPK;SYMPK variant protein	B7Z6F7;A0A024R0R6;Q92797;A0A087WUE9;Q4LE61;M0R3C7	Symplekin	NaN	NaN	NaN	NaN	NaN	NaN	NaN	NaN	NaN	NaN	NaN	NaN	NaN	NaN	NaN	NaN	NaN	NaN	NaN	NaN	NaN	NaN	NaN	NaN	NaN	NaN	NaN	NaN	NaN	NaN	NaN	NaN	NaN	NaN	NaN	NaN	NaN	NaN	NaN	NaN	NaN	NaN	NaN	NaN	NaN	NaN
NAPA	M0R0Y2;A0A024R0R9;P54920;M0R2M1	Alpha-soluble NSF attachment protein	-0.314636	0.509069	0.0660498	-0.108628	0.828331	1.03337	-0.0546401	0.354991	1.09434	0.444007	0.198702	0.727929	0.383366	-0.503956	-0.136216	-0.501669	0.465544	-0.102719	0.41702	0.376339	0.15052	-0.262824	0.529834	0.388579	0.373238	-0.677503	0.219415	-0.417352	0.360175	-0.0874972	-0.526209	0.106933	0.0440821	-0.146697	0.0778679	-0.175409	0.443168	-0.143083	0.31165	-0.243913	0.914169	0.151378	0.00510178	NaN	-0.0875101	0.0233003
EHD2	B4DLA1;A0A024R0S6;Q9NZN4;B3KUH4;Q8NCJ3	EH domain-containing protein 2	NaN	NaN	NaN	NaN	NaN	2.00857	NaN	3.13441	NaN	2.09505	3.56921	NaN	NaN	NaN	NaN	NaN	NaN	NaN	NaN	3.34086	NaN	NaN	2.55937	2.67282	NaN	3.29803	NaN	3.01054	NaN	2.78688	2.14057	NaN	NaN	3.58677	3.64604	3.36272	NaN	3.86872	NaN	1.35871	3.4736	3.3609	2.47939	3.85317	NaN	2.26805
XRCC1	F5H8D7;A0A024R0S8;Q59HH7;P18887;B4DTD3;B4DEB2;B2RCY5	DNA repair protein XRCC1	NaN	NaN	NaN	NaN	NaN	NaN	NaN	NaN	NaN	NaN	NaN	NaN	NaN	NaN	0.611623	NaN	NaN	NaN	NaN	NaN	NaN	NaN	NaN	NaN	NaN	NaN	NaN	NaN	NaN	NaN	NaN	NaN	NaN	NaN	NaN	NaN	NaN	NaN	NaN	NaN	NaN	NaN	NaN	NaN	NaN	NaN
SH3BP5L	Q96MW4;B4DSF1;A0A024R0T2;Q7L8J4	SH3 domain-binding protein 5-like	NaN	NaN	NaN	NaN	NaN	NaN	NaN	NaN	NaN	NaN	NaN	NaN	NaN	NaN	NaN	NaN	NaN	NaN	NaN	NaN	NaN	NaN	NaN	NaN	NaN	NaN	NaN	NaN	NaN	NaN	NaN	NaN	NaN	NaN	NaN	NaN	NaN	NaN	NaN	NaN	NaN	NaN	NaN	NaN	NaN	NaN
VASP	A0A0S2Z4I9;A0A0S2Z4N8;A0A024R0V4;P50552;A0A0S2Z4I7	Vasodilator-stimulated phosphoprotein	NaN	0.112544	2.6685	NaN	0.324882	NaN	NaN	NaN	NaN	NaN	-0.155072	NaN	-0.391328	0.00187666	-0.649153	0.183081	0.876731	-0.130008	-1.21971	-0.58853	NaN	NaN	0.323994	0.62471	0.714775	NaN	1.20347	NaN	0.0825759	NaN	1.14235	-0.150949	0.420533	NaN	0.725351	NaN	NaN	NaN	1.14025	-1.30772	NaN	NaN	NaN	NaN	NaN	0.879515
hCG_30204;ACACA	A0A024R0Y2;B2ZZ90;Q13085;Q59FY4	Acetyl-CoA carboxylase 1;Biotin carboxylase	NaN	0.97534	NaN	NaN	NaN	NaN	NaN	NaN	NaN	NaN	-0.627233	NaN	0.795243	NaN	NaN	NaN	NaN	NaN	NaN	0.358306	NaN	NaN	NaN	NaN	NaN	NaN	-0.131721	NaN	NaN	NaN	NaN	0.673877	NaN	NaN	NaN	NaN	NaN	NaN	1.55839	NaN	NaN	NaN	NaN	NaN	NaN	NaN
PFKM	A0A024R0Y5;P08237;A0A0S2Z4A1;Q96I60;A0A0S2Z4I1;Q7KYX9	ATP-dependent 6-phosphofructokinase;ATP-dependent 6-phosphofructokinase, muscle type	-0.397325	-0.366697	-0.291678	-0.134613	-0.198659	-0.306809	-0.296891	0.13211	-0.317801	-0.628151	-0.203687	-0.536411	0.271218	-0.629787	0.00969103	-0.140303	-0.465204	0.0247528	-0.172838	-0.0216551	0.247205	-0.456632	0.346436	0.259628	-0.25198	0.14906	0.124523	-0.175153	-0.353296	0.0238763	-0.0529442	0.152733	0.238602	0.455201	0.0975568	-0.17863	-0.0641514	0.206538	0.280031	0.241677	0.516065	-0.0744579	-0.0233345	0.102154	0.63543	-0.00776345
ARF1;ARF3	A0A024R3Q3;A0A024R0Y6;P84077;P61204;F5H423;B4E190;B4DN70;B4DEB9;B4DJC8	ADP-ribosylation factor 1;ADP-ribosylation factor 3	-0.398282	0.0178181	-0.248897	-0.467558	0.351322	-0.643872	-0.471041	-0.74124	-0.114078	-0.513901	-0.445509	-0.0166028	-0.726013	0.327097	0.201796	-0.50079	0.185733	-0.256703	-0.507963	-0.944862	-0.21793	0.529542	-0.192659	-0.453488	-0.753707	-1.07517	0.0487761	-0.453387	0.00159483	-0.155563	-0.217706	0.0248906	-0.499616	-0.527627	-0.371164	-0.545683	-0.144474	-0.41413	-0.250399	-0.114446	0.257911	0.0863788	0.0414697	-0.110364	-0.58953	0.225407
DDX23	B3KY11;A0A024R0Z3;Q9BUQ8;A8KA56	Probable ATP-dependent RNA helicase DDX23	-0.126709	NaN	NaN	0.385445	-2.00357	1.09912	2.08596	NaN	0.290178	NaN	1.3339	1.44481	1.06111	2.4534	NaN	NaN	0.979174	2.76867	NaN	-0.0820213	NaN	NaN	1.64469	2.6481	0.0583827	1.69558	0.10519	0.409753	0.90644	0.29307	1.23576	0.0560312	-0.434917	NaN	1.91697	NaN	NaN	NaN	0.433282	NaN	NaN	NaN	NaN	0.0541676	NaN	0.419955
TMBIM6;TEGT	F8VQW0;F8VX73;F8VPI1;F8W201;F8W086;F8VR05;B7Z984;F8VQQ5;F8VSI7;F8VVJ4;B7Z5Y9;B3KWE3;A0A024R0Z5;P55061;F8W1G3	Bax inhibitor 1	NaN	NaN	NaN	NaN	NaN	NaN	NaN	NaN	NaN	NaN	NaN	NaN	NaN	NaN	NaN	NaN	NaN	NaN	NaN	NaN	NaN	NaN	NaN	NaN	NaN	NaN	NaN	NaN	NaN	NaN	NaN	NaN	NaN	NaN	NaN	NaN	NaN	NaN	NaN	NaN	NaN	NaN	NaN	NaN	NaN	NaN
METTL7A	B4DDW1;F8VQX6;H0YI09;A0A024R118;Q9H8H3	Methyltransferase-like protein 7A	NaN	NaN	NaN	NaN	NaN	NaN	NaN	NaN	NaN	NaN	NaN	NaN	NaN	NaN	NaN	NaN	NaN	NaN	NaN	NaN	NaN	NaN	NaN	NaN	NaN	NaN	NaN	NaN	NaN	NaN	NaN	NaN	NaN	NaN	NaN	NaN	NaN	NaN	NaN	NaN	NaN	NaN	NaN	NaN	NaN	NaN
TFCP2;UBP1	F8VX55;A0A024R120;Q12800;C9JWL3;F8VWL0	Alpha-globin transcription factor CP2	NaN	NaN	NaN	NaN	NaN	NaN	NaN	NaN	NaN	NaN	NaN	NaN	NaN	NaN	NaN	NaN	NaN	NaN	NaN	NaN	NaN	NaN	NaN	NaN	NaN	NaN	NaN	NaN	NaN	NaN	-0.115965	NaN	NaN	NaN	NaN	NaN	-0.102322	NaN	NaN	NaN	NaN	NaN	NaN	NaN	NaN	NaN
PRKAG1	A0A024R125;P54619;F8VYY9;H0YHF8;H0YIC9	5-AMP-activated protein kinase subunit gamma-1	0.809246	0.720789	NaN	0.979743	0.446319	NaN	NaN	0.62411	0.877526	0.301141	-0.0380177	NaN	0.0469235	1.63312	1.64323	0.282018	1.85168	0.662018	0.68265	NaN	0.876121	NaN	0.151794	0.607287	1.14324	-0.500034	-0.150115	-0.0163536	0.475415	-1.29704	NaN	-0.361869	NaN	NaN	-0.367818	-1.0195	-0.0779266	NaN	-0.560715	-1.318	0.989277	-0.928654	-1.19402	0.789437	NaN	0.296173
MCRS1	A0A024R134;F8W126;Q96EZ8	Microspherule protein 1	NaN	NaN	NaN	NaN	NaN	NaN	NaN	NaN	NaN	NaN	NaN	NaN	NaN	NaN	NaN	NaN	NaN	NaN	NaN	NaN	NaN	NaN	NaN	NaN	NaN	NaN	NaN	NaN	NaN	NaN	NaN	NaN	NaN	NaN	NaN	NaN	NaN	NaN	NaN	NaN	NaN	NaN	NaN	NaN	NaN	NaN
hCG_28765;AKAP2	A0A024R152;A0A024R167;C9JVY5		-0.972225	-0.832307	-0.999125	-1.07903	-1.29837	-0.917074	-0.989176	-1.04306	-1.12154	-0.878636	-0.863021	-0.650088	-0.559802	-0.848803	-1.26026	-1.04286	-1.22404	-0.904749	-0.83121	-0.631758	-0.41689	0.116698	-0.398032	-1.10736	-1.2037	-1.3865	-0.817981	-1.01966	-0.965887	-1.26233	-0.653879	-0.602541	-0.747598	-0.897294	-0.756722	-1.50611	-2.31705	-1.42283	-1.06219	-1.40524	-0.973021	-0.683077	-2.26262	-0.892749	-1.22495	-1.14717
TEX10	A0A024R169;Q9NXF1;B4DQR0	Testis-expressed sequence 10 protein	NaN	NaN	-0.533563	NaN	NaN	NaN	NaN	NaN	NaN	NaN	0.742893	NaN	NaN	NaN	NaN	NaN	NaN	0.329595	NaN	0.912619	NaN	NaN	NaN	NaN	NaN	NaN	NaN	NaN	NaN	NaN	NaN	NaN	NaN	NaN	NaN	NaN	NaN	NaN	-0.556405	NaN	-1.53718	-0.985946	NaN	NaN	NaN	NaN
ARAF	B4DV85;A0A024R178;Q96II5;P10398;A0A0S2Z3F2	Serine/threonine-protein kinase A-Raf	NaN	NaN	NaN	NaN	NaN	NaN	NaN	NaN	NaN	NaN	NaN	NaN	NaN	NaN	NaN	NaN	NaN	NaN	NaN	NaN	NaN	NaN	NaN	NaN	NaN	NaN	NaN	NaN	NaN	NaN	NaN	NaN	NaN	NaN	1.03401	NaN	NaN	NaN	NaN	NaN	NaN	NaN	NaN	NaN	NaN	NaN
NCBP1	A0A024R179;Q09161	Nuclear cap-binding protein subunit 1	-0.837055	-0.0894982	-0.795684	0.400739	0.727019	-0.277149	0.631757	-0.208311	0.0484118	-0.0765341	NaN	0.0408982	NaN	0.359916	0.313804	-0.479003	NaN	0.0288113	NaN	0.241432	NaN	0.103377	0.257201	-0.109962	NaN	-0.765103	NaN	NaN	NaN	-1.5888	NaN	NaN	-0.515006	NaN	NaN	NaN	NaN	NaN	NaN	NaN	NaN	NaN	NaN	NaN	NaN	-0.608242
ALG2	A0A024R184;Q9H553;B3KNL8	Alpha-1,3/1,6-mannosyltransferase ALG2	NaN	NaN	NaN	NaN	NaN	NaN	NaN	NaN	NaN	NaN	NaN	NaN	NaN	NaN	NaN	NaN	NaN	NaN	NaN	NaN	NaN	NaN	NaN	NaN	NaN	NaN	NaN	NaN	NaN	NaN	NaN	NaN	NaN	NaN	NaN	-1.33885	NaN	NaN	NaN	NaN	NaN	NaN	NaN	NaN	NaN	NaN
UBE1;UBA1	A0A024R1A3;P22314;B4DDE4;B4DL67	Ubiquitin-like modifier-activating enzyme 1	-0.715351	-0.985457	-1.16673	-0.684835	-0.770088	-2.03203	-0.258885	-0.973308	-0.954274	-0.94139	-0.878263	-1.01172	-1.32667	-1.35392	-1.39218	-1.37381	-1.02303	-1.19891	-0.913662	-1.0491	-5.43938	-1.10896	-1.35535	-0.881339	-1.57742	-1.10185	-0.911119	-1.01128	-0.825372	-1.07392	-1.55508	-1.01967	-1.20174	-1.03829	-0.866133	-1.19874	-0.911697	-1.44785	-1.18169	-1.10692	-0.971034	-0.714291	-1.27896	-1.07934	-0.828072	-1.32776
UBE2L3	A8K4W8;A0A024R1A4;P68036	Ubiquitin-conjugating enzyme E2 L3	-0.929104	0.0668181	NaN	-0.404774	0.366703	-0.742524	1.04832	-0.283803	0.713237	-1.7212	-1.22529	0.496549	-1.58063	-1.30432	NaN	-0.593784	-0.118627	-0.0380947	-1.18491	-0.788519	-1.30808	-0.671829	0.0442744	0.0683023	-0.536937	-0.967	-1.61075	-1.36474	-0.710211	NaN	-0.991011	NaN	0.172856	-0.305212	-0.97944	-1.25455	NaN	-0.479748	-0.638038	-1.43894	-2.05115	-1.4049	-2.58811	-1.8202	NaN	NaN
MTP18;MTFP1	A0A024R1E4;Q9UDX5;B5MC22;H7C417	Mitochondrial fission process protein 1	NaN	0.550449	NaN	NaN	NaN	NaN	NaN	NaN	NaN	NaN	NaN	NaN	NaN	NaN	NaN	0.640524	NaN	NaN	NaN	NaN	NaN	NaN	NaN	NaN	NaN	NaN	NaN	NaN	1.17951	NaN	NaN	NaN	NaN	NaN	NaN	NaN	NaN	NaN	NaN	NaN	-0.848844	NaN	NaN	NaN	NaN	NaN
MB	B0QYF8;A0A024R1G3;P02144;F2Z2F1;B2RA67;F2Z337	Myoglobin	2.12238	2.00205	2.55362	1.68284	1.17031	2.70719	1.91958	2.78139	1.74077	2.13482	1.82041	1.7443	0.780668	2.25372	2.24726	2.38071	2.12088	1.92231	1.76674	2.69643	4.07732	3.14448	2.03734	2.56879	3.31064	3.82827	1.44737	3.02755	3.06989	3.14768	3.06555	2.77838	2.91598	3.89142	2.50372	3.1158	3.59588	3.12194	2.64589	3.05115	3.8677	4.06152	4.05948	3.27864	3.99448	2.30187
PDXP	A0A024R1I3;Q96GD0	Pyridoxal phosphate phosphatase	1.46025	NaN	NaN	0.671472	NaN	-0.300651	NaN	0.900384	0.201855	0.841999	1.23538	0.810435	0.422185	0.28627	0.330229	0.203585	0.57085	0.286463	0.239582	0.287571	NaN	NaN	0.10011	0.206098	0.294208	-0.470679	0.385354	-0.40983	-0.307799	-0.280838	-0.114367	-0.399162	0.19532	NaN	0.251127	NaN	NaN	NaN	NaN	NaN	0.503405	NaN	NaN	NaN	NaN	-0.0721745
PICK1	F6V107;A0A024R1R7;Q53HE0;B3KM22;A0A024R1J5;Q9NRD5	PRKCA-binding protein	NaN	NaN	NaN	NaN	NaN	NaN	NaN	NaN	NaN	NaN	NaN	NaN	NaN	NaN	NaN	NaN	NaN	NaN	NaN	NaN	NaN	NaN	NaN	NaN	NaN	NaN	NaN	NaN	NaN	NaN	NaN	NaN	NaN	NaN	NaN	NaN	NaN	NaN	NaN	NaN	NaN	NaN	NaN	NaN	NaN	NaN
EIF4ENIF1	B1AKL6;B1AKL5;Q6PJR2;B1AKL4;A0A024R1K0;Q9NRA8	Eukaryotic translation initiation factor 4E transporter	NaN	NaN	NaN	NaN	NaN	NaN	NaN	NaN	NaN	NaN	NaN	NaN	NaN	NaN	NaN	NaN	NaN	NaN	NaN	NaN	NaN	NaN	NaN	NaN	NaN	NaN	NaN	NaN	NaN	NaN	NaN	NaN	NaN	NaN	NaN	NaN	NaN	NaN	NaN	NaN	NaN	NaN	NaN	NaN	NaN	NaN
YWHAH	A0A024R1K7;Q04917;Q9H4N8;A2IDB2	14-3-3 protein eta	-0.424888	-1.20536	-1.5256	-0.878953	-0.902921	-0.44754	-0.369363	-1.24888	0.699572	-0.642627	-0.299168	-0.142486	-1.17284	-0.135224	-2.69118	-1.18327	-0.560404	-0.590851	-0.55723	-0.921988	-0.869261	-0.0775095	-0.48906	-2.03304	-2.15667	-1.00414	-1.38961	-1.07792	-0.587811	-2.06809	-1.2098	-0.947181	-0.650339	-0.557507	-1.00202	-1.29378	-0.872514	-0.688064	-0.922906	-2.15985	-1.64194	-0.758005	-2.27217	-2.65497	-1.95553	-1.48824
SF3A1	A0A024R1K8;Q15459;B4E091	Splicing factor 3A subunit 1	-0.707243	-4.22466	-1.6168	-0.777956	-0.969908	-1.47754	-0.860252	-1.18241	-1.77921	-1.31673	-0.52103	0.418524	-1.66872	-0.296931	-1.05798	-1.2416	-0.100093	-1.32636	-0.154727	-0.473941	1.16465	-0.495758	-0.84099	-0.735393	-1.67853	-1.29851	-0.817419	-1.11722	-0.228462	-0.693718	-1.94366	0.395982	-0.0326227	0.157692	-0.849619	-0.898692	-0.102492	-0.311736	0.403066	-0.26312	-0.442548	-0.479595	-2.53623	-1.17364	NaN	-1.19604
APOL2	A0A024R1M8;J3KQL8;B4E1T5;Q9BQE5	Apolipoprotein L2	NaN	NaN	NaN	NaN	0.295323	NaN	NaN	NaN	NaN	NaN	NaN	1.34688	-0.851759	NaN	NaN	NaN	NaN	NaN	NaN	NaN	NaN	NaN	0.704771	0.00798571	NaN	NaN	1.32532	NaN	NaN	-1.05443	NaN	NaN	-0.948227	-0.51167	NaN	NaN	-0.412185	NaN	NaN	NaN	NaN	NaN	NaN	NaN	NaN	0.0423527
MYH9	A0A024R1N1;P35579;Q86XU5	Myosin-9	0.376706	0.212421	-0.331462	0.187778	0.296626	-0.206892	0.527642	-0.200647	0.104525	-0.0681245	-0.370518	0.52584	0.438164	0.0631815	-0.041359	-0.0343795	0.49721	-0.058782	0.942341	0.246698	-0.0291232	0.523342	0.120325	0.0949691	0.0119342	0.0054543	0.219589	-0.0245493	0.196896	-0.184708	0.0304849	0.0606347	0.144888	0.107114	0.408715	-0.569781	0.656347	0.134157	0.280837	-0.144284	0.513091	0.543843	-0.382132	0.744705	0.73205	0.258083
XRCC6	A0A024R1N4;P12956;B1AHC9;B2RDN9;B4DE32;B4E356	X-ray repair cross-complementing protein 6	-1.00091	-3.27817	-0.560623	-1.88117	-1.80708	-2.98687	-0.51359	-2.38788	-1.90251	-0.808526	-0.718759	-0.661663	-0.93007	-1.84483	-0.718365	-1.25818	-1.84324	-1.58696	-0.665228	-0.92765	-0.751112	-0.486537	-0.74725	-0.905018	-1.75914	-1.26011	-2.1264	-1.6881	-0.859169	-1.53048	-1.56927	-0.810046	-1.33931	-1.30365	-1.2617	-1.67105	-1.1162	-1.6109	-0.916088	-1.63747	-1.1134	-0.475433	-1.58974	-1.58946	-1.21375	-1.48499
UNC84B;SUN2	A0A024R1P7;B4E2A6;Q9UH99;B4DIU6;Q6NT72;A8K129	SUN domain-containing protein 2	0.828658	3.28007	1.27485	3.50706	0.536378	3.1386	1.29074	2.15629	5.88991	4.20777	-0.0226564	0.544119	0.556754	3.75939	NaN	-0.230695	2.63703	0.65102	1.0741	0.479632	3.96515	NaN	0.982561	0.810829	0.0656922	2.79789	1.68622	-0.304482	0.467208	0.471425	0.617762	3.16482	1.55152	NaN	2.56141	1.29549	NaN	-0.867343	0.789088	NaN	1.47166	4.44374	4.38269	2.50436	3.23678	4.60753
NAGA	A0A024R1Q5;P17050	Alpha-N-acetylgalactosaminidase	NaN	2.58528	0.227506	NaN	NaN	1.23121	NaN	NaN	NaN	NaN	2.34403	2.47033	NaN	2.23923	NaN	0.145988	NaN	1.39089	1.6118	1.16994	2.47209	1.41677	0.343128	NaN	0.714587	0.520149	1.53885	NaN	0.773516	0.696026	NaN	2.35572	1.07379	0.675328	NaN	NaN	0.0561542	0.00569547	NaN	NaN	NaN	0.0368219	NaN	NaN	NaN	NaN
RPL23	Q9BTQ7;A0A024R1Q8;P62829;C9JD32;J3KT29;J3KTJ3;B9ZVP7	60S ribosomal protein L23	0.778573	0.710462	-0.00411125	0.151543	0.661495	-0.34084	0.0380101	-0.181794	0.293364	0.273476	0.329984	0.406408	-0.0464033	0.0965964	0.259116	0.187348	0.365708	0.153416	0.42508	0.0756632	-0.0665899	0.240407	0.126003	0.307762	0.199657	-0.158639	0.207811	0.151508	0.723254	0.563191	0.153241	0.437633	0.149062	0.120514	0.769358	-0.190449	0.975837	0.112326	0.770336	0.136851	0.067848	0.3795	-0.0558032	-0.0164613	-0.12241	0.614927
GTPBP1	A0A024R1S5;O00178;B2RDW9	GTP-binding protein 1	-0.317304	0.622303	-1.11683	NaN	-0.150568	-0.00762614	0.200548	0.447623	-1.06074	-0.9868	0.146683	0.309174	-0.145462	-0.962364	-0.444113	-0.360401	NaN	-1.61282	-0.656796	-0.318291	-0.928367	-0.493234	-1.1298	-0.148688	-0.321527	-0.580536	0.938901	-1.83548	-0.41045	0.518618	-1.27166	-1.16564	-0.862969	-0.689622	-0.195096	-0.793152	-0.207643	-2.02264	-0.562341	-1.74639	0.377407	NaN	NaN	-1.10762	-1.07758	NaN
SMARCE1	J3QKS7;B4DGM3;A0A024R1S7;Q969G3;K7EMQ8;H7C048	SWI/SNF-related matrix-associated actin-dependent regulator of chromatin subfamily E member 1	NaN	-1.62405	NaN	NaN	-1.02098	-3.97499	NaN	NaN	NaN	NaN	NaN	-0.827169	-1.67492	-0.0764222	NaN	NaN	NaN	NaN	-2.22676	NaN	NaN	NaN	-1.80261	-0.876566	NaN	-1.35772	-0.27644	NaN	NaN	-2.73961	NaN	-3.19204	-1.55768	NaN	-1.70071	NaN	NaN	NaN	NaN	NaN	NaN	NaN	NaN	NaN	-2.73084	-0.703898
LASP1	A0A024R1S8;Q14847;C9J9W2;A8K1D2;B4DIC4;B4DJI4	LIM and SH3 domain protein 1	0.0231469	0.413222	-0.314976	0.187884	0.242298	0.908632	1.83768	1.11846	0.0583979	1.18222	-0.365245	1.21535	-0.514391	0.520793	-0.193039	-1.02517	0.480191	-0.806497	0.499606	-0.740587	-0.292664	0.170313	0.341756	0.502815	NaN	-0.629007	0.114165	NaN	0.535938	0.13841	0.222128	-0.333767	-0.333282	-2.44948	0.0432548	-1.19257	-0.354781	0.202721	-0.0160545	-0.629473	NaN	0.906305	-0.313272	NaN	-0.289244	0.492576
KRT35;KRTHA5	C4AM86;A0A024R1T2;Q92764;CON__Q92764	Keratin, type I cuticular Ha5	NaN	NaN	NaN	NaN	NaN	NaN	NaN	NaN	NaN	3.13708	NaN	NaN	NaN	NaN	NaN	1.22553	NaN	NaN	NaN	NaN	NaN	NaN	NaN	NaN	NaN	NaN	NaN	NaN	NaN	NaN	NaN	NaN	NaN	NaN	NaN	NaN	NaN	NaN	NaN	NaN	NaN	NaN	NaN	NaN	NaN	NaN
CNP	A0A024R1T5;P09543	2,3-cyclic-nucleotide 3-phosphodiesterase	-0.21918	-0.794056	0.173519	-0.0710401	-0.441914	-1.27889	-0.32934	-0.152314	0.299656	0.60516	1.19127	0.527444	-0.530112	0.149001	-0.643232	-0.617973	-0.159073	-0.371552	0.264191	-0.615818	0.559749	0.106367	-0.133754	-0.24869	-0.668341	-0.672077	-0.839549	0.366616	-0.323686	-0.679386	-0.564012	-0.563756	-0.803468	-0.576135	-0.158854	-0.662216	-0.598988	-1.25704	-0.481275	-0.865852	-0.600466	-0.412629	-0.0636	-0.0554458	-1.41783	-0.000628576
ACLY;ACLY variant protein	A0A024R1Y2;A0A024R1T9;Q4LE36;P53396;Q8N9C4	ATP-citrate synthase	NaN	NaN	NaN	NaN	NaN	NaN	NaN	NaN	NaN	NaN	NaN	NaN	NaN	NaN	NaN	NaN	1.39407	NaN	NaN	NaN	NaN	NaN	NaN	NaN	NaN	NaN	NaN	NaN	NaN	NaN	NaN	NaN	0.26505	NaN	NaN	NaN	NaN	NaN	NaN	NaN	NaN	1.16634	NaN	NaN	NaN	NaN
RANGAP1	A0A024R1U0;P46060;B4DY16;B4E0U0	Ran GTPase-activating protein 1	NaN	0.315688	NaN	0.231549	0.491916	0.812714	NaN	-0.937269	NaN	-0.182819	-0.796099	0.942279	0.833285	0.254616	0.159058	NaN	NaN	0.57753	-0.00520697	-0.66421	NaN	NaN	-1.69986	NaN	NaN	-0.0244615	3.08743	0.488208	NaN	0.112989	0.585778	-0.360984	-0.498736	-0.0938305	NaN	1.1257	1.15579	1.12211	-0.185486	NaN	0.277845	-0.439763	NaN	NaN	NaN	NaN
RAB5C	A0A024R1U4;P51148;K7ERI8;F8VVK3;K7ENY4	Ras-related protein Rab-5C	NaN	2.38248	NaN	1.41549	2.27872	2.55089	3.0889	4.44106	1.56402	0.867963	NaN	2.73785	0.454486	2.10866	NaN	0.486004	1.64178	NaN	NaN	1.56449	NaN	NaN	0.216015	-0.266037	NaN	NaN	1.32124	NaN	NaN	NaN	NaN	0.364293	0.296213	NaN	-0.362105	NaN	NaN	NaN	-0.273934	NaN	2.97562	NaN	NaN	3.01964	NaN	0.408991
RPL27	E4W6B6;B2R4D8;A0A024R1V4;P61353;K7ELC7;K7EQQ9	60S ribosomal protein L27	-1.29836	-0.746012	-1.10282	-1.26125	-0.551017	-1.31914	-1.02034	-2.03448	-0.842454	-1.19755	-1.26506	-1.73568	-0.304046	-0.950468	-0.325386	-0.521348	-1.08742	-0.556694	-0.719354	-0.782006	-0.874785	-0.551035	-0.745263	-1.57135	-0.949415	-1.17385	-0.182317	-1.65699	-1.06438	-1.26464	-0.865835	-0.472029	-0.462578	-1.30221	-0.218471	-1.09886	-0.170491	-0.828372	-0.337916	-1.63229	-0.929433	-0.718298	-1.1526	-0.464929	-0.641725	-0.0189175
FKBP10;DKFZp666D193	A0A024R1W3;Q96AY3;B4DJJ5;Q658U4;Q8NAG5;Q6ZME7;H0Y827	Peptidyl-prolyl cis-trans isomerase FKBP10	-0.559639	0.315415	-1.0018	-1.123	-0.888383	-1.15264	NaN	NaN	-0.316955	NaN	0.0182064	NaN	0.521337	0.599528	-1.81262	-1.22854	-1.31771	-1.37618	-0.975997	-1.77509	0.523815	NaN	0.903198	NaN	NaN	-1.19724	0.0371149	-0.500394	0.432092	NaN	-1.05061	-1.3525	-0.317565	NaN	-1.14019	NaN	NaN	NaN	-0.440127	NaN	-1.50075	-0.0500489	NaN	NaN	-0.198997	-1.37267
ORMDL3	J3QRM9;A0A024R1W6;Q8N138	ORM1-like protein 3	NaN	NaN	NaN	NaN	NaN	NaN	NaN	NaN	NaN	NaN	NaN	NaN	NaN	NaN	NaN	NaN	NaN	NaN	NaN	NaN	NaN	NaN	NaN	NaN	NaN	NaN	NaN	NaN	NaN	NaN	NaN	NaN	NaN	NaN	NaN	NaN	NaN	NaN	NaN	NaN	NaN	NaN	NaN	NaN	NaN	NaN
VPS25	K7EKV4;A0A024R1X3;Q9BRG1	Vacuolar protein-sorting-associated protein 25	NaN	1.7035	0.56531	-0.0732419	NaN	-0.847436	-0.507922	-0.908659	-1.59034	NaN	-0.128425	NaN	0.293845	-0.66437	-1.08086	NaN	-0.446658	-0.240864	0.0240764	NaN	-0.474877	NaN	-0.38228	-0.456386	NaN	-0.240007	NaN	NaN	NaN	NaN	NaN	1.63674	NaN	-1.22706	NaN	NaN	-2.28793	-1.85867	1.04382	-1.16262	-0.211286	-0.0370308	-0.742431	0.556054	NaN	-0.394075
hCG_16955;COA3	A0A024R1X4;Q9Y2R0;K7EPV0	Cytochrome c oxidase assembly factor 3 homolog, mitochondrial	-0.0787004	-0.328254	0.7711	-0.411168	0.0171028	0.753225	-1.12704	-0.556146	-0.452683	0.14768	0.260377	-0.680007	-1.02528	0.328599	-0.567304	-1.20709	0.322523	-1.07164	0.165337	0.265786	-0.203264	0.211465	-0.729444	-1.07786	-0.0299829	-1.07005	-0.473849	-0.469469	-0.446377	0.555545	-0.239031	-0.392128	-0.682873	0.335463	-0.230874	-0.199227	0.111444	-0.518967	-0.346338	-0.210859	-1.36164	-0.43138	-1.17827	-0.992749	-0.0567222	-0.138567
JUP	A0A0S2Z487;A0A024R1X8;P14923	Junction plakoglobin	-0.878846	-0.760784	-0.798343	-0.751445	-0.55491	-1.64502	-1.22437	-0.874861	-1.25066	-0.603557	-1.20425	-0.677616	-1.02068	-1.16352	-0.510034	-1.14078	-0.996141	-1.03569	-1.38609	-0.678991	-1.46812	-1.15876	-0.314703	-0.835406	-0.574027	-1.28185	-1.08498	-1.13513	-1.22655	-1.14405	-0.998513	-1.05481	-1.05238	-0.745354	-0.845859	-0.889623	-0.849755	-0.835764	-0.840344	-1.16308	-1.10061	-1.13134	-0.827971	-1.41446	-0.952251	-1.18027
PALM	B2RCL4;A0A024R1Y6;O75781;A0A024R207;B7Z649;B3KMX3	Paralemmin-1	-1.4536	0.154305	-0.374511	-0.0070519	0.113035	-1.37823	0.217139	-0.904001	0.786459	-0.278131	-0.127647	-0.117448	0.407182	-0.266239	-0.795518	-0.787581	-1.2085	0.3083	-0.00263715	-1.06881	-0.0481126	-1.13424	0.187817	-0.574784	-1.11297	-0.497206	-0.53854	-0.798782	-0.55116	0.524957	-0.49334	0.386689	0.730328	0.405356	0.748675	-1.76406	NaN	NaN	0.698529	NaN	0.0478665	0.0750944	NaN	0.914385	NaN	-0.941933
VAT1	A0A024R1Z6;Q99536;B3KUF8	Synaptic vesicle membrane protein VAT-1 homolog	0.895759	0.818698	0.190064	1.10006	1.08481	0.562202	1.27028	0.59526	0.588144	0.532092	0.86397	0.994799	1.03996	1.55842	0.962596	0.190691	1.42883	0.638855	0.478896	0.192266	0.192759	1.16677	1.03814	0.984984	0.134135	0.0449091	0.827989	0.10252	0.466237	0.397239	0.19849	0.690035	0.412145	0.465638	0.16701	-0.202967	0.367667	-0.237378	0.65441	-0.182188	-0.00508131	0.709631	-0.47958	0.39177	0.545537	-0.0126418
PSMD13	A0A024R201;Q9Y6E3;Q9UNM6;Q53GN6;B2RBM7;A0A087WUL9;B4DJ66;J3KNQ3;E9PL38;H0YD73	26S proteasome non-ATPase regulatory subunit 13	-0.376749	0.0368791	-0.617431	0.126933	-0.00282538	-0.0131928	0.538681	-0.0794229	-0.290228	-0.183236	-0.00961921	-0.773808	0.0916801	-0.0591651	-0.0303647	-0.595559	0.721582	-0.374475	-0.225608	0.00143865	-0.431246	0.446615	-0.157778	0.39694	-0.822922	-0.677323	0.016573	-0.89739	-0.410118	-0.671593	-0.819626	-0.223233	-0.140146	-0.496636	-0.861099	-0.967993	-0.286585	-0.866073	0.0007606	-1.12773	-1.17947	-0.217402	-0.99502	-0.466345	-1.01515	-0.497246
PSME3;HEL-S-283	K7ENH2;K9J957;V9HWJ8;A0A024R203;P61289;J7FRP4;A0A087WTV2;B3KQ25;K7ESG5;Q6FHK7	Proteasome activator complex subunit 3	NaN	NaN	NaN	NaN	NaN	NaN	NaN	NaN	-0.226262	NaN	NaN	NaN	NaN	NaN	-0.553459	-1.12281	NaN	-0.513794	-0.501312	NaN	NaN	1.21585	0.802285	NaN	NaN	NaN	-0.673367	NaN	NaN	-0.397474	NaN	NaN	0.318776	0.80367	NaN	0.223102	0.238698	NaN	0.377956	-0.697863	0.193321	0.237541	NaN	NaN	NaN	NaN
RNF126	U3KQF4;K7EIY6;A0A024R206;Q9BV68;A8K0Q1	E3 ubiquitin-protein ligase RNF126	NaN	NaN	NaN	NaN	NaN	NaN	NaN	NaN	NaN	NaN	NaN	NaN	NaN	NaN	NaN	NaN	NaN	NaN	NaN	NaN	NaN	NaN	NaN	NaN	NaN	NaN	NaN	NaN	NaN	NaN	NaN	NaN	NaN	NaN	NaN	NaN	NaN	NaN	NaN	NaN	NaN	NaN	NaN	NaN	NaN	NaN
IFITM2;IFITM3;IFITM1	H7BYV1;E9PS44;E9PQN9;A0A024R210;Q6IBB0;H9NL19;H9NL12;H9NKY4;P13164;Q01629;Q01628	Interferon-induced transmembrane protein 1;Interferon-induced transmembrane protein 2;Interferon-induced transmembrane protein 3	0.0582476	NaN	NaN	-0.0743683	NaN	-0.0986889	1.01812	NaN	NaN	0.33061	NaN	NaN	0.446541	0.182276	-0.226509	NaN	0.525476	NaN	-0.718614	NaN	NaN	NaN	NaN	NaN	-0.250719	NaN	NaN	NaN	NaN	NaN	-0.195348	NaN	NaN	-0.81032	NaN	-0.431781	0.125478	NaN	0.187724	-0.838911	NaN	NaN	NaN	NaN	NaN	NaN
HDGFRP3	A0A024R216;Q9Y3E1	Hepatoma-derived growth factor-related protein 3	0.54555	1.02497	0.444616	0.0801489	0.720766	NaN	NaN	NaN	1.26482	1.01142	0.371889	1.15319	0.88106	1.31268	0.77798	0.942628	0.500079	1.33592	-0.195726	2.04388	0.442458	2.10955	-0.0619861	1.79541	-0.513086	0.895318	0.290822	-0.341189	0.699724	-0.756938	NaN	-0.0750822	-0.389285	-0.413597	0.346995	-0.0140713	-0.386159	-0.310318	-0.672471	NaN	-0.383276	NaN	NaN	NaN	NaN	0.332135
PSAT1	A0A024R280;A0A024R222;B4DHQ3;Q9Y617	Phosphoserine aminotransferase	NaN	NaN	NaN	NaN	NaN	NaN	NaN	NaN	NaN	NaN	NaN	NaN	NaN	NaN	NaN	NaN	NaN	NaN	NaN	NaN	NaN	NaN	NaN	NaN	NaN	NaN	NaN	NaN	NaN	NaN	NaN	NaN	NaN	NaN	NaN	NaN	NaN	NaN	NaN	NaN	NaN	NaN	NaN	NaN	NaN	NaN
VPS13A	A0A024R223;A0A024R238;Q96RL7	Vacuolar protein sorting-associated protein 13A	NaN	NaN	NaN	NaN	NaN	NaN	NaN	NaN	NaN	NaN	NaN	NaN	NaN	NaN	NaN	NaN	NaN	NaN	3.72234	NaN	NaN	NaN	NaN	NaN	NaN	NaN	NaN	NaN	NaN	NaN	NaN	NaN	NaN	NaN	NaN	NaN	NaN	NaN	NaN	NaN	NaN	NaN	NaN	NaN	NaN	NaN
TJP2	A0A024R233;B7Z954;A0A1B0GTW1;Q9UDY2	Tight junction protein ZO-2	NaN	-0.483571	NaN	NaN	-1.08773	NaN	NaN	NaN	NaN	NaN	NaN	NaN	NaN	NaN	NaN	NaN	NaN	NaN	NaN	NaN	NaN	NaN	0.251178	NaN	NaN	0.925467	NaN	NaN	NaN	NaN	NaN	0.765891	NaN	0.399026	NaN	NaN	NaN	NaN	-0.843984	NaN	NaN	NaN	NaN	NaN	NaN	NaN
GNAQ	A0A024R240;P50148;G9FP35;B1AM21	Guanine nucleotide-binding protein G(q) subunit alpha	NaN	1.13816	NaN	NaN	NaN	NaN	0.139045	NaN	NaN	NaN	NaN	-0.213129	NaN	NaN	NaN	NaN	0.999048	NaN	NaN	NaN	NaN	NaN	NaN	NaN	NaN	NaN	NaN	-1.32838	NaN	0.556202	NaN	NaN	NaN	NaN	NaN	NaN	NaN	NaN	NaN	NaN	NaN	NaN	NaN	NaN	NaN	NaN
C9orf89	A0A024R248;Q96LW7	Bcl10-interacting CARD protein	NaN	0.920101	NaN	NaN	NaN	NaN	NaN	NaN	NaN	NaN	1.9841	NaN	NaN	NaN	NaN	NaN	NaN	NaN	NaN	NaN	NaN	NaN	NaN	NaN	NaN	NaN	NaN	NaN	NaN	NaN	NaN	NaN	NaN	NaN	NaN	-0.399007	NaN	NaN	NaN	NaN	0.260705	NaN	NaN	NaN	NaN	NaN
MAGED1;FLJ00163	A0A024R254;Q9Y5V3;Q8TEN0	Melanoma-associated antigen D1	NaN	NaN	NaN	NaN	NaN	NaN	NaN	NaN	NaN	NaN	NaN	NaN	NaN	NaN	NaN	NaN	NaN	NaN	NaN	NaN	NaN	NaN	NaN	NaN	NaN	NaN	NaN	NaN	NaN	NaN	NaN	NaN	NaN	NaN	NaN	NaN	NaN	NaN	NaN	NaN	NaN	NaN	NaN	NaN	NaN	NaN
UBQLN1	A0A024R258;B3KNI8;B3KNI2;Q9UMX0;Q59FJ2	Ubiquilin-1	NaN	NaN	NaN	NaN	NaN	NaN	NaN	NaN	NaN	NaN	NaN	NaN	NaN	NaN	NaN	NaN	NaN	NaN	NaN	NaN	NaN	NaN	NaN	NaN	NaN	NaN	NaN	NaN	NaN	NaN	NaN	NaN	NaN	NaN	NaN	NaN	NaN	NaN	NaN	NaN	-0.828225	NaN	NaN	NaN	NaN	NaN
RPL17;hCG_24487;RPL17-C18orf32	A0A087WXM6;J3QQT2;J3KRX5;A0A024R261;A0A0A6YYL6;P18621;J3QLC8;A0A0A0MRF8;J3KRB3;A0A087WWH0;J3QS96	60S ribosomal protein L17	-0.623806	-0.513775	-0.429188	-0.562749	0.0801386	-0.820292	-1.14375	-2.55986	-0.495942	-0.826348	-0.250139	-0.402664	-0.863435	-0.676145	-0.869153	-0.958265	-0.772604	-0.831718	-0.392992	-0.907318	-1.04403	-1.41055	-1.69793	-1.73025	-0.845916	-0.976154	-0.506135	-0.776322	-0.522753	-2.28458	-0.863758	-0.886159	-0.966583	-1.16441	-0.963401	-1.6074	-0.657951	-1.65825	-1.64846	-1.68199	-0.445108	-1.62577	-1.07194	-1.14671	-0.894636	-1.63199
CTSL1;CTSL	B3KQK4;A5PLM9;A0A024R276;P07711;Q5T8F0	Cathepsin L1;Cathepsin L1 heavy chain;Cathepsin L1 light chain	NaN	NaN	NaN	NaN	NaN	NaN	NaN	NaN	NaN	NaN	NaN	NaN	NaN	NaN	NaN	NaN	NaN	NaN	NaN	NaN	NaN	NaN	NaN	NaN	NaN	NaN	NaN	NaN	NaN	NaN	NaN	NaN	NaN	NaN	NaN	NaN	NaN	NaN	NaN	NaN	NaN	NaN	NaN	NaN	NaN	NaN
SPTLC1	A0A024R277;O15269;Q6NUL7;Q59EQ4	Serine palmitoyltransferase 1	NaN	0.472809	NaN	NaN	1.77487	NaN	NaN	NaN	NaN	NaN	NaN	NaN	NaN	NaN	NaN	NaN	NaN	NaN	NaN	NaN	NaN	NaN	NaN	NaN	NaN	NaN	1.34271	NaN	NaN	NaN	NaN	1.13369	NaN	NaN	NaN	NaN	NaN	NaN	NaN	NaN	NaN	NaN	NaN	NaN	NaN	NaN
KDSR;FVT1	K7ERC8;A0A024R292;Q06136	3-ketodihydrosphingosine reductase	NaN	NaN	NaN	NaN	NaN	NaN	NaN	NaN	NaN	NaN	NaN	NaN	NaN	NaN	NaN	NaN	NaN	NaN	NaN	NaN	NaN	NaN	1.27781	NaN	NaN	NaN	NaN	NaN	NaN	NaN	NaN	NaN	NaN	NaN	2.8292	NaN	NaN	NaN	NaN	NaN	NaN	NaN	NaN	NaN	2.19027	NaN
LMAN1	B2R774;A0A024R2A7;P49257;Q53FS4	Protein ERGIC-53	-1.33777	-1.04308	-0.673737	-0.370276	-0.773701	-1.05523	-0.903724	-0.257373	-0.496161	-1.09524	0.0946612	-0.539883	-0.517682	-0.919455	-1.41269	-1.31289	-1.36002	-1.38899	-0.643035	-0.997131	-0.650624	1.06673	-0.582209	1.4498	-1.68232	-0.500331	-0.936798	-1.52207	-0.861704	-1.60967	-0.885028	-0.759879	-1.13021	-1.05321	0.0918658	-1.89227	0.365764	0.129471	0.620889	-0.0284974	-0.693675	-0.850137	-1.16798	-1.27585	-1.73288	-0.196985
VPS4B	A8K5D8;A8K4G7;A0A024R2C5;O75351	Vacuolar protein sorting-associated protein 4B	NaN	NaN	NaN	NaN	NaN	NaN	NaN	NaN	NaN	NaN	NaN	NaN	NaN	NaN	NaN	NaN	NaN	NaN	NaN	NaN	NaN	NaN	NaN	NaN	NaN	NaN	NaN	NaN	NaN	NaN	NaN	NaN	NaN	NaN	NaN	NaN	NaN	NaN	NaN	NaN	NaN	NaN	NaN	NaN	NaN	NaN
ARL8B	B4DQT8;A0A024R2D4;B4E1J8;Q9NVJ2	ADP-ribosylation factor-like protein 8B	NaN	0.835111	NaN	NaN	NaN	NaN	NaN	NaN	NaN	NaN	-0.616546	NaN	NaN	NaN	0.443262	NaN	NaN	NaN	-0.297954	2.66127	NaN	NaN	NaN	NaN	NaN	NaN	-1.23401	0.5944	NaN	NaN	NaN	-0.322851	NaN	-0.786178	NaN	-0.561106	NaN	-2.2117	NaN	NaN	NaN	-0.242572	NaN	NaN	NaN	-1.23744
TMEM43;FLJ00144	A0A024R2F9;Q9BTV4;A0A0S2Z5N2;Q8TEP9	Transmembrane protein 43	-0.0286039	0.843407	-0.259975	0.368724	0.4738	-0.585059	-0.174143	-0.517755	0.674475	-0.0879668	0.818631	1.18015	0.888657	0.432459	-0.51554	-0.0892269	0.86518	0.50781	-0.909477	-0.175374	NaN	NaN	0.627521	2.53366	2.63415	-0.486045	1.65831	-1.25944	0.415804	3.39165	0.998433	NaN	-0.0241777	NaN	1.75137	1.01836	1.54401	NaN	NaN	0.740095	-0.388977	NaN	NaN	NaN	NaN	NaN
CRELD1	A0A024R2G1;Q96HD1	Cysteine-rich with EGF-like domain protein 1	NaN	NaN	NaN	NaN	NaN	NaN	NaN	NaN	NaN	NaN	NaN	NaN	NaN	NaN	NaN	NaN	NaN	NaN	NaN	NaN	NaN	NaN	1.30483	NaN	NaN	NaN	NaN	NaN	NaN	NaN	NaN	NaN	NaN	NaN	NaN	NaN	NaN	NaN	NaN	NaN	NaN	NaN	NaN	NaN	NaN	NaN
RPL32	D3YTB1;A0A024R2G7;F8W727;P62910	60S ribosomal protein L32	-0.160465	-0.303034	-0.550005	-0.675814	-0.21487	-0.733524	1.03227	-0.0797256	0.235463	0.0402929	-0.0606729	0.367232	-0.143287	0.440964	0.294089	-0.996438	1.11356	-0.738876	-0.140412	-0.38955	-0.578394	0.109777	-0.121271	-0.130209	-0.196424	-0.5626	0.293985	-1.1274	-0.413714	-0.418045	-0.745758	0.234987	-0.201868	-0.682679	-0.151676	-0.518436	-0.251352	-0.966889	-0.134462	0.18011	0.29022	-0.183848	-0.239639	-0.235682	-0.6555	-0.465218
TBC1D5	C9J3F6;B9A6K1;A0A024R2J9;A0A024R2H0;Q92609	TBC1 domain family member 5	NaN	NaN	NaN	NaN	NaN	NaN	NaN	NaN	NaN	NaN	NaN	NaN	NaN	NaN	NaN	NaN	NaN	NaN	NaN	NaN	NaN	NaN	NaN	NaN	NaN	NaN	NaN	NaN	NaN	NaN	NaN	NaN	NaN	NaN	NaN	NaN	NaN	NaN	NaN	NaN	NaN	NaN	NaN	NaN	NaN	NaN
TRNT1	A0A024R2H7;Q96Q11	CCA tRNA nucleotidyltransferase 1, mitochondrial	NaN	NaN	NaN	NaN	NaN	NaN	NaN	NaN	NaN	NaN	NaN	NaN	NaN	NaN	NaN	NaN	NaN	NaN	NaN	NaN	NaN	NaN	NaN	NaN	NaN	NaN	NaN	NaN	NaN	NaN	NaN	NaN	NaN	NaN	NaN	NaN	NaN	NaN	NaN	NaN	NaN	NaN	NaN	NaN	NaN	NaN
CRBN	J3QT51;B4DW89;J3QT87;A0A024R2H8;Q96SW2	Protein cereblon	NaN	NaN	NaN	NaN	NaN	NaN	NaN	NaN	NaN	NaN	NaN	NaN	NaN	NaN	NaN	NaN	NaN	NaN	NaN	NaN	NaN	NaN	NaN	NaN	NaN	NaN	NaN	NaN	NaN	NaN	NaN	NaN	NaN	NaN	NaN	NaN	NaN	NaN	NaN	NaN	NaN	NaN	NaN	NaN	NaN	NaN
UBP1	A0A024R2J0;A8KAN5;A0A024R2L0;Q9NZI7	Upstream-binding protein 1	NaN	NaN	NaN	NaN	NaN	NaN	NaN	NaN	NaN	NaN	NaN	NaN	NaN	NaN	NaN	NaN	NaN	NaN	NaN	NaN	NaN	NaN	NaN	NaN	NaN	NaN	NaN	NaN	NaN	NaN	NaN	NaN	NaN	NaN	NaN	NaN	NaN	NaN	NaN	NaN	NaN	NaN	NaN	NaN	NaN	NaN
RAB5A	A0A024R2K1;P20339;A0A0A1HAN9	Ras-related protein Rab-5A	NaN	0.979317	NaN	1.09471	0.00248568	0.0919279	NaN	-0.395392	-0.466653	NaN	0.102392	0.702891	-0.725264	0.511033	-0.0996318	NaN	NaN	NaN	NaN	NaN	-0.677441	NaN	0.752729	-0.117961	NaN	-1.10581	1.22722	NaN	0.275908	NaN	-0.104739	-1.11223	-0.280006	NaN	0.137934	-1.03633	0.831435	NaN	1.27872	NaN	NaN	NaN	-0.979733	NaN	NaN	0.0343967
LRRFIP2	A0A024R2K4;Q9Y608	Leucine-rich repeat flightless-interacting protein 2	-3.45154	-2.11245	0.133575	-1.30644	-0.468652	-2.29364	NaN	-0.370935	-1.04928	-0.519642	0.173238	NaN	-0.181983	-0.0640551	-1.03354	-0.0758544	0.356473	NaN	-0.0152121	-1.85973	NaN	NaN	0.373682	-0.0183888	NaN	-0.523261	-0.775177	NaN	NaN	-1.26868	-1.36076	0.00974218	0.0556813	NaN	NaN	NaN	-0.140517	NaN	NaN	NaN	NaN	NaN	NaN	NaN	NaN	NaN
GUP1;HHATL	A0A024R2M3;Q9HCP6	Protein-cysteine N-palmitoyltransferase HHAT-like protein	NaN	0.403292	-0.991898	-0.316609	1.13683	NaN	NaN	1.78971	NaN	-0.248049	NaN	0.758868	-0.0586089	1.00381	NaN	0.423217	0.327566	-1.17037	0.04792	NaN	NaN	NaN	0.546985	-0.996244	-0.284988	NaN	-0.0128382	NaN	-0.399335	0.765744	-0.766977	0.236785	-0.759813	-0.35821	-1.03476	0.201759	-0.519617	0.121385	-0.342443	NaN	0.436829	NaN	NaN	NaN	NaN	NaN
ACAA1	Q8NCW8;B4DEN6;A0A024R2M6;P09110;H7C131;C9JDE9;A0A140VJX0;H0Y4D4	3-ketoacyl-CoA thiolase, peroxisomal	0.895288	0.755081	1.26356	0.196085	-0.566447	0.516156	1.35245	0.544081	NaN	NaN	0.361353	-0.134599	0.698535	-0.490365	0.486758	0.256567	0.903506	0.20405	-0.066346	0.21026	1.14	NaN	0.95248	0.258707	NaN	0.483703	1.09515	0.0364995	-0.171207	0.504997	0.28312	-0.340304	0.0795304	-0.480058	0.504673	0.0733659	-0.0328061	NaN	NaN	0.711835	0.023212	-0.185643	0.0342489	NaN	NaN	NaN
OXSR1	A0A024R2M7;O95747;C9JIG9	Serine/threonine-protein kinase OSR1	-0.56669	3.23161	0.171176	0.412969	1.82734	1.69488	1.52559	1.53689	0.746662	2.47505	0.750678	0.540681	2.07505	1.13331	0.570517	1.47968	1.92269	4.07414	1.06487	-0.109522	1.05536	0.897825	1.65606	1.28937	1.45978	0.157672	1.86744	0.0134332	1.17705	0.220349	-0.205252	-1.26183	1.09612	1.28566	-0.384084	0.671057	1.47225	NaN	0.692652	-0.0980819	-0.471606	-0.124913	-0.696915	0.614744	NaN	NaN
HIGD1A	B2R4G1;A0A024R2M9;Q9Y241;C9JAW5;C9JNU6	HIG1 domain family member 1A, mitochondrial	NaN	NaN	NaN	NaN	NaN	NaN	NaN	NaN	NaN	NaN	NaN	NaN	NaN	NaN	NaN	NaN	NaN	NaN	NaN	NaN	NaN	NaN	NaN	NaN	NaN	NaN	NaN	NaN	NaN	NaN	NaN	NaN	NaN	NaN	NaN	NaN	NaN	NaN	NaN	NaN	NaN	NaN	NaN	NaN	NaN	NaN
RPSA;LOC388524	C9J9K3;A0A024R2P0;A0A0C4DG17;P08865;Q96RS2;A0A024R7P5;F8WD59	40S ribosomal protein SA	0.17772	-0.387751	-0.852959	-0.59376	-0.565922	-0.813271	-0.546496	-1.05396	-0.580778	-0.692535	-0.260496	-0.612744	-0.383706	-0.45052	-0.554009	-0.933636	-0.501395	-0.470563	-0.101269	-0.56042	-0.36996	-0.834424	-0.441128	-0.0764575	-0.681929	-0.974347	-0.608982	-1.10153	-0.568724	-0.418278	-0.759246	-0.261333	-0.439781	-0.584145	-0.383489	-0.769566	-0.406162	-0.806597	-0.582567	-1.10341	-0.704004	-0.327304	-1.0554	-0.492012	-0.816168	-0.0742637
CTNNB1	B4DL06;A0A024R2Q3;P35222;B4DGU4;B5BU28;B4DSW9	Catenin beta-1	-0.824559	-0.152354	-1.11505	-0.555733	-0.446473	-0.899379	-0.208471	-0.750421	-0.446807	-0.611677	-0.614921	-0.313178	-0.915547	-0.453498	-0.839569	-0.53645	0.030827	-0.935912	-0.991433	-0.605896	-0.293035	0.00335944	-0.54433	-0.139829	-0.752027	-1.47297	-0.170659	-0.693931	-0.854061	-1.28186	-0.109761	-0.948516	-0.975489	-0.411991	-0.764106	-0.956539	-0.671311	-0.789955	-0.724655	-1.09621	-0.504175	-1.14167	0.364473	-1.17469	-0.887404	-0.620209
RPL15	A0A024R2Q4;P61313;B4DLP4;E7EQV9;E7ENU7;B4DEN1	Ribosomal protein L15;60S ribosomal protein L15	-1.04683	-0.192952	-1.5401	-1.04453	-0.681764	-0.838186	-0.773152	-1.07024	NaN	-0.774295	-0.684952	0.0724628	-0.793168	-0.414136	NaN	0.353819	-0.356456	-1.06075	0.127655	-0.539551	-0.848901	-0.996967	NaN	-0.603312	NaN	-0.445824	-0.595504	-0.903736	-0.367664	-0.627327	-0.96916	-0.51924	-0.368149	-0.197362	-0.252416	-1.12846	NaN	NaN	-0.133169	-0.641947	-0.436044	-0.631346	-0.5757	-0.383165	-0.951364	-0.263756
MYL3	A0A024R2Q5;P08590	Myosin light chain 3	1.89163	1.69288	-2.92218	1.91806	-3.91171	2.29764	-1.91027	2.20588	1.75126	2.01338	1.75028	-2.54937	1.59273	-2.48217	2.17785	2.66405	-2.51722	1.63309	1.4732	2.24514	1.70259	-2.52665	2.30849	2.48457	2.26215	2.7996	-1.75401	3.11393	-1.6098	2.3908	2.97559	-1.59521	-1.63018	2.82408	-2.25326	3.10337	-1.71146	2.29854	-3.60092	2.9276	2.29669	1.14488	3.12443	-1.92311	2.68745	-2.76086
OXSM	A0A024R2Q9;Q9NWU1	3-oxoacyl-[acyl-carrier-protein] synthase, mitochondrial	NaN	NaN	NaN	NaN	NaN	NaN	NaN	NaN	NaN	NaN	-0.221568	NaN	-0.497434	NaN	NaN	NaN	NaN	NaN	-1.28596	NaN	NaN	NaN	-0.660472	NaN	NaN	-1.48264	NaN	NaN	NaN	NaN	NaN	NaN	NaN	NaN	NaN	NaN	NaN	NaN	NaN	NaN	NaN	NaN	NaN	NaN	NaN	NaN
GPX1	A0A024R2T1		NaN	NaN	NaN	NaN	NaN	NaN	NaN	NaN	NaN	NaN	NaN	NaN	NaN	NaN	NaN	NaN	NaN	NaN	NaN	NaN	NaN	NaN	NaN	NaN	NaN	NaN	NaN	NaN	NaN	NaN	NaN	NaN	NaN	NaN	NaN	NaN	NaN	NaN	NaN	NaN	-0.611172	NaN	NaN	NaN	NaN	NaN
DHX30	H7BXY3;A0A024R2T6;Q7L2E3	Putative ATP-dependent RNA helicase DHX30	-0.678342	NaN	NaN	-0.713737	NaN	-0.0480967	NaN	-2.26234	NaN	NaN	NaN	NaN	-0.287591	NaN	1.13524	NaN	1.57562	NaN	NaN	NaN	NaN	NaN	0.278951	NaN	NaN	NaN	NaN	NaN	-0.818114	-0.754887	NaN	NaN	NaN	-0.549788	1.19354	NaN	NaN	NaN	0.619403	0.0326395	NaN	0.438737	NaN	NaN	NaN	NaN
RBM5	A0A024R2U6;P52756;Q59HE6	RNA-binding protein 5	NaN	NaN	NaN	NaN	NaN	NaN	NaN	NaN	NaN	NaN	NaN	NaN	NaN	NaN	NaN	NaN	NaN	NaN	NaN	NaN	NaN	NaN	NaN	NaN	NaN	NaN	NaN	NaN	NaN	NaN	NaN	NaN	NaN	NaN	NaN	NaN	NaN	NaN	NaN	NaN	NaN	NaN	NaN	NaN	NaN	NaN
hCG_2001997;AMT	A0A024R2U7;P48728;B3KRJ7;A0A1B0GTM2;A0A1B0GWC4;A0A1B0GVP5;B3KTU4;A0A1B0GTA8;H0Y695;A0A1B0GUU7;B4DGG9;A0A1B0GTV8;A0A1B0GUH1;Q49A62	Aminomethyltransferase;Aminomethyltransferase, mitochondrial	-0.570213	-0.166742	0.37516	-0.64284	0.31716	-1.13119	1.49182	0.00267416	0.507726	0.383021	0.688831	-0.460585	-0.343271	0.172994	-1.48729	-0.579484	0.0960685	-0.539372	0.428352	0.13422	NaN	0.307234	-0.690854	0.0826028	-0.423202	-0.0787216	-0.486726	NaN	-0.563646	0.360564	0.141802	-1.01506	-0.930397	-0.0416635	-0.129745	NaN	-0.964879	-0.30702	-0.749187	-0.671112	-0.390932	0.076145	0.26708	-0.298038	NaN	-0.548733
APEH	A0A024R2U9;C9JIF9;P13798;H7C393	Acylamino-acid-releasing enzyme	-0.52372	0.476189	-0.303515	-0.278042	0.0188002	-0.159735	0.37676	-0.409664	-0.0468293	-0.0834791	0.28983	0.651681	0.554544	0.121489	-0.590176	-1.26651	-0.0536718	0.0145944	0.405367	-0.354447	0.237566	0.676059	0.142934	-0.408495	-0.795479	-0.549657	-0.296225	-0.474137	-0.382539	-0.554428	-0.986702	-0.557605	-0.171849	-0.613222	-0.650313	-0.650399	-0.236222	-0.498254	-0.647439	-0.772476	-0.358943	-0.223942	-0.242314	-0.602947	-0.104472	-0.351378
CCDC51	A0A024R2V4;Q96ER9	Coiled-coil domain-containing protein 51	NaN	NaN	NaN	NaN	NaN	NaN	NaN	NaN	NaN	NaN	NaN	NaN	NaN	NaN	NaN	NaN	NaN	NaN	NaN	NaN	NaN	NaN	NaN	NaN	NaN	NaN	NaN	NaN	NaN	NaN	NaN	NaN	NaN	NaN	NaN	NaN	NaN	NaN	NaN	NaN	NaN	NaN	NaN	NaN	NaN	NaN
DAG1	A0A024R2W4;Q14118	Dystroglycan;Alpha-dystroglycan;Beta-dystroglycan	-0.378228	-0.277411	-0.386755	0.25019	0.39694	0.275622	0.136725	0.420821	-0.000970121	0.277342	0.551459	0.671727	-0.155754	0.305038	-0.0384698	-0.0631887	-0.103317	-0.453935	0.145153	0.406246	0.211632	0.356194	0.0304698	0.183155	0.0953729	0.517006	-0.129069	0.124837	-0.081558	0.277022	-0.0511744	0.0407051	-0.421177	0.145223	0.292312	0.084092	0.182786	-0.257791	0.448463	-0.110609	0.372787	0.374192	0.342785	-0.460955	-0.0362924	0.154631
GMPPB	A0A024R2X1;A0A024R329;Q9Y5P6	Mannose-1-phosphate guanyltransferase beta	NaN	NaN	NaN	1.39559	NaN	NaN	NaN	NaN	-0.19497	NaN	NaN	NaN	NaN	3.97376	NaN	0.795734	0.340203	2.3603	1.57308	0.869122	NaN	NaN	NaN	NaN	NaN	-0.116498	NaN	NaN	NaN	2.85663	NaN	NaN	2.88875	1.30418	NaN	NaN	NaN	NaN	3.01987	NaN	NaN	1.24544	1.19916	NaN	NaN	NaN
GNL3	A0A024R2Z6;Q9BVP2	Guanine nucleotide-binding protein-like 3	NaN	NaN	NaN	NaN	NaN	NaN	NaN	NaN	NaN	NaN	NaN	NaN	NaN	NaN	NaN	NaN	NaN	NaN	NaN	NaN	NaN	NaN	NaN	NaN	NaN	NaN	NaN	NaN	NaN	NaN	NaN	NaN	NaN	NaN	NaN	NaN	NaN	-1.15892	NaN	NaN	NaN	NaN	NaN	NaN	NaN	NaN
CHDH	A0A024R301;Q8NE62;B4DMQ4	Choline dehydrogenase, mitochondrial	NaN	NaN	NaN	NaN	NaN	NaN	NaN	0.921254	NaN	NaN	NaN	NaN	NaN	NaN	NaN	NaN	NaN	NaN	NaN	NaN	NaN	NaN	1.56247	NaN	NaN	NaN	NaN	NaN	NaN	NaN	NaN	NaN	NaN	NaN	NaN	NaN	NaN	NaN	NaN	NaN	NaN	NaN	NaN	NaN	NaN	NaN
GLT8D1	C9JPK4;C9JA13;C9J880;A0A024R313;Q68CQ7	Glycosyltransferase 8 domain-containing protein 1	NaN	NaN	NaN	NaN	NaN	NaN	NaN	NaN	NaN	NaN	NaN	NaN	NaN	NaN	NaN	NaN	NaN	NaN	NaN	NaN	NaN	NaN	NaN	NaN	NaN	NaN	NaN	NaN	NaN	NaN	NaN	NaN	NaN	NaN	NaN	NaN	NaN	NaN	NaN	NaN	NaN	NaN	NaN	NaN	NaN	NaN
LAMB2	A0A024R319;P55268	Laminin subunit beta-2	-0.116205	-0.488374	-0.202087	0.34741	-0.0547038	0.395464	-0.205079	0.366375	0.441299	0.244215	1.1166	0.298875	0.393334	0.159594	0.113948	0.00671103	0.084318	0.0506795	0.280471	0.679979	0.267761	0.783338	0.225003	-0.0541941	0.715862	0.271474	0.462691	-0.399428	0.0764443	0.128696	0.200756	0.301289	0.147739	0.495531	0.915012	-0.0164391	0.774431	0.563797	0.352407	-0.252174	0.427145	0.181344	0.244424	0.52141	0.43892	0.235016
FLNB;DKFZp686A1668	A0A024R321;O75369;Q68CT4;E7EN95	Filamin-B	NaN	1.62611	NaN	0.796887	1.73845	NaN	1.99648	NaN	NaN	NaN	-0.720988	2.07503	1.15364	1.54247	NaN	1.18374	1.87832	2.39233	2.18712	NaN	NaN	NaN	0.889922	NaN	NaN	0.766096	1.48582	NaN	1.27915	NaN	NaN	1.36834	0.417136	0.69956	1.38266	NaN	NaN	NaN	1.2285	0.376976	1.30304	1.37548	NaN	NaN	1.3619	1.86198
RHOA;ARHA	A0A024R324;P61586;B4DKN9;Q9BVT0	Transforming protein RhoA	-1.79234	-1.04355	-1.76087	-0.0504965	0.786561	-2.6601	0.175887	0.311071	-0.466248	-1.3667	-0.181759	-0.193734	-0.971054	0.179413	-0.255319	-1.04361	-0.00157997	-0.52832	-0.281441	-0.375953	-0.832631	0.204481	-1.18611	-3.71243	-0.303099	-1.46136	0.215896	-0.882179	0.153402	-0.454334	-0.454182	-0.0653123	-0.142764	-0.378614	0.0998995	-0.654332	0.0305019	-0.683756	0.0266692	-0.631001	-1.04406	-0.455935	-0.93651	-1.9528	-1.24801	-0.798592
SUCLG2	A0A024R325;Q96I99;Q3ZCW5;E9PDQ8	Succinyl-CoA ligase subunit beta;Succinyl-CoA ligase [GDP-forming] subunit beta, mitochondrial	0.00709917	-0.303166	0.142136	0.170641	-0.0108076	0.183409	0.136741	0.673335	-0.0084976	0.611383	0.0813724	0.0976567	-0.511305	0.569289	-0.0764078	0.558995	0.382416	-0.0991905	-0.175216	-0.471639	0.0209827	-0.539667	-0.267789	-0.356682	0.494623	0.658854	0.223552	0.148663	0.456392	0.0116523	0.214994	-0.354619	0.0402475	-0.300401	-0.08646	0.574711	-0.0186232	-0.149352	-0.061113	0.492907	0.763023	1.06244	0.895565	0.640902	0.222127	-0.00479956
RPL29	A0A024R326;Q6IPI1;P47914	60S ribosomal protein L29	0.353399	-0.293962	-1.25218	-1.81341	-1.52344	-1.72668	-0.498557	-0.91853	-1.21967	-1.61872	0.677767	-1.72391	-1.68779	-0.740016	-0.727912	-1.8941	0.0125499	-1.17018	-0.553874	-1.232	-1.76346	-1.81678	-0.970994	-1.44427	-1.62398	-0.196623	-0.76696	-1.8111	-0.470659	-1.35691	-2.06283	-1.01328	-0.985381	-1.88499	-1.38668	-0.651786	-1.31115	-1.56859	-0.471344	-0.722474	0.447091	0.846715	0.305529	-0.73336	-0.762221	-0.28585
TMEM113;WDR82	A0A024R333;Q6UXN9	WD repeat-containing protein 82	NaN	NaN	NaN	NaN	NaN	NaN	NaN	NaN	NaN	NaN	NaN	NaN	NaN	NaN	NaN	NaN	NaN	NaN	NaN	NaN	NaN	NaN	NaN	-0.635801	NaN	NaN	NaN	NaN	NaN	NaN	NaN	NaN	NaN	NaN	NaN	-2.39561	NaN	NaN	NaN	NaN	NaN	NaN	NaN	NaN	NaN	NaN
FHIT	A0A024R366;P49789;E9PBZ0	Bis(5-adenosyl)-triphosphatase	NaN	NaN	NaN	0.814108	1.81416	0.529593	-0.0961269	NaN	NaN	NaN	NaN	0.719638	NaN	NaN	NaN	NaN	NaN	NaN	NaN	NaN	NaN	NaN	NaN	NaN	NaN	NaN	0.912809	NaN	0.0819039	NaN	NaN	0.19755	NaN	NaN	NaN	-0.14438	NaN	NaN	0.496244	0.128835	NaN	-0.116099	NaN	NaN	NaN	NaN
ARL6IP5	B4DZZ0;B3KQB4;A0A024R371;O75915	PRA1 family protein 3	-0.830716	-0.770422	-1.707	-0.866233	-1.11876	-1.01074	-1.0914	-1.07701	-0.965286	-0.845252	-0.877916	-0.394032	-1.13176	-1.55023	-1.58443	-1.4555	-1.05196	-1.57213	-0.717439	-1.09466	-0.437153	-0.933904	-0.939327	-0.836691	-1.08506	-0.88787	-1.1065	-1.93935	-0.705048	-1.23264	-1.03865	-1.48668	-1.13347	-0.671888	-1.17109	-1.99136	-1.10179	-1.66479	-1.02796	-0.915875	-1.20636	-1.20927	-2.00582	-1.54883	-1.90853	-1.52906
CTSB	B4DL49;A0A024R374;P07858;A8K2H4;B4DMY4;B3KUJ8;Q6LAF9	Cathepsin B;Cathepsin B light chain;Cathepsin B heavy chain	-1.15655	-0.504185	-0.632541	-0.593641	-0.307617	-0.608082	0.212183	-0.956013	-0.663891	-0.664551	-0.905324	-0.3818	-0.533383	-0.784745	-0.955473	-1.12653	-0.840039	-0.760109	-0.263782	-0.5377	-0.9414	-0.0651099	-1.06054	-0.645662	-1.36275	-1.13542	-0.236508	-0.912395	-0.0136356	-0.683363	-0.49021	0.0323607	-0.487037	-0.773998	-0.329834	-1.19256	-0.345238	-0.737215	-0.164526	-1.39896	-0.783281	-0.237651	-0.985736	-0.282608	-1.02024	-0.392428
THUMPD1;44M2.1;DKFZp686C1054	A0A024R388;Q9NXG2;O60362;Q6MZT3	THUMP domain-containing protein 1	NaN	NaN	NaN	NaN	NaN	NaN	NaN	NaN	NaN	NaN	NaN	NaN	NaN	NaN	NaN	NaN	NaN	NaN	NaN	NaN	NaN	NaN	NaN	NaN	NaN	NaN	NaN	NaN	NaN	NaN	NaN	NaN	NaN	NaN	NaN	NaN	NaN	NaN	NaN	NaN	NaN	NaN	NaN	NaN	NaN	NaN
CHORDC1	A0A024R394;Q9UHD1;A0A024R3C3;E9PHZ2	Cysteine and histidine-rich domain-containing protein 1	NaN	NaN	NaN	NaN	NaN	NaN	NaN	NaN	NaN	NaN	NaN	NaN	1.19555	NaN	NaN	NaN	NaN	NaN	NaN	NaN	NaN	NaN	NaN	NaN	NaN	-1.20082	0.81084	NaN	NaN	NaN	NaN	NaN	NaN	NaN	NaN	NaN	NaN	NaN	NaN	NaN	NaN	NaN	NaN	NaN	NaN	NaN
MRE11A	F8W7U8;A0A024R395;P49959;Q05D78	Double-strand break repair protein MRE11A	-0.659103	NaN	NaN	NaN	NaN	NaN	NaN	NaN	NaN	NaN	NaN	-0.77273	-0.688813	NaN	NaN	NaN	NaN	-2.80818	NaN	NaN	NaN	NaN	-0.286999	-0.847035	-1.9283	NaN	-0.192068	NaN	NaN	NaN	NaN	-0.834388	-0.412402	-1.76791	-1.29637	NaN	-1.58472	NaN	-0.256045	NaN	-0.579566	-1.02148	NaN	NaN	NaN	-1.06929
C11orf54	A0A087WT99;A0A024R3B0;A8K718;A0A024R396;Q9H0W9;E9PJU8;E9PQS1	Ester hydrolase C11orf54	NaN	NaN	NaN	NaN	NaN	NaN	NaN	NaN	NaN	NaN	NaN	NaN	NaN	NaN	NaN	NaN	NaN	NaN	NaN	NaN	NaN	NaN	-1.38946	NaN	NaN	-0.601316	NaN	NaN	NaN	NaN	NaN	-0.858061	NaN	NaN	NaN	NaN	NaN	NaN	NaN	NaN	NaN	NaN	NaN	NaN	NaN	NaN
HSPC148;CWC15	A0A024R3B4;A0A024R3C8;Q9P013	Spliceosome-associated protein CWC15 homolog	NaN	NaN	NaN	NaN	NaN	NaN	NaN	NaN	NaN	NaN	NaN	NaN	NaN	NaN	NaN	NaN	NaN	NaN	NaN	NaN	NaN	NaN	NaN	NaN	NaN	NaN	NaN	NaN	NaN	NaN	NaN	NaN	NaN	NaN	NaN	NaN	NaN	NaN	NaN	NaN	NaN	NaN	NaN	NaN	NaN	NaN
ATM;DKFZp781A0353	A0A024R3C7;Q13315;B4DSP3;Q68DE6	Serine-protein kinase ATM	NaN	NaN	NaN	NaN	NaN	NaN	NaN	NaN	NaN	NaN	NaN	NaN	NaN	NaN	NaN	NaN	NaN	NaN	NaN	NaN	NaN	NaN	NaN	NaN	NaN	NaN	NaN	NaN	NaN	NaN	NaN	NaN	NaN	NaN	NaN	NaN	NaN	NaN	NaN	NaN	NaN	NaN	NaN	NaN	NaN	NaN
DLAT	Q86YI5;A0A024R3D8;P10515;B4DJX1;H0YDD4;E9PEJ4;B4DS43;B4DLQ2	Acetyltransferase component of pyruvate dehydrogenase complex;Dihydrolipoyllysine-residue acetyltransferase component of pyruvate dehydrogenase complex, mitochondrial	0.618523	0.21272	0.221015	0.787963	0.416941	0.437995	-0.14499	0.308722	0.403263	0.621438	0.465548	0.25793	0.501777	0.354859	0.321267	0.775849	0.60929	0.643182	0.212408	-0.000879828	0.52892	0.386245	0.609982	0.395055	0.984405	0.658634	0.570227	0.510353	0.512099	1.26776	0.670669	0.602377	0.453406	0.824301	0.425187	0.648391	0.538827	1.15409	0.559546	0.795892	0.912969	0.369025	0.792877	0.53859	1.16486	0.953579
APOA1	A0A024R3E3;P02647;F8W696	Apolipoprotein A-I;Proapolipoprotein A-I;Truncated apolipoprotein A-I	NaN	NaN	NaN	NaN	NaN	NaN	4.25293	NaN	NaN	NaN	NaN	NaN	NaN	3.2709	NaN	NaN	NaN	NaN	NaN	NaN	NaN	NaN	NaN	NaN	NaN	NaN	NaN	NaN	3.3495	NaN	NaN	NaN	NaN	NaN	NaN	NaN	NaN	3.00543	NaN	NaN	3.66867	3.12482	NaN	NaN	NaN	NaN
KIAA0638;PHLDB1	Q5W9G0;A0A024R3F4;A0A024R3H6;Q86UU1;Q96D60;B0YJ65;Q6ZUD6;Q8NC75;A0A087WZL0	Pleckstrin homology-like domain family B member 1	NaN	NaN	NaN	NaN	NaN	NaN	NaN	NaN	NaN	NaN	NaN	NaN	1.90509	NaN	NaN	NaN	NaN	NaN	NaN	NaN	NaN	NaN	NaN	NaN	NaN	NaN	NaN	NaN	NaN	NaN	NaN	NaN	NaN	NaN	NaN	NaN	NaN	NaN	NaN	NaN	NaN	NaN	NaN	NaN	NaN	NaN
LOH11CR2A;VWA5A	A8K6N3;A0A024R3H3;O00534;B4DHS6	von Willebrand factor A domain-containing protein 5A	NaN	NaN	NaN	NaN	NaN	NaN	NaN	NaN	NaN	NaN	NaN	NaN	NaN	NaN	NaN	NaN	NaN	NaN	NaN	NaN	NaN	NaN	NaN	NaN	NaN	NaN	NaN	NaN	NaN	NaN	NaN	NaN	NaN	NaN	NaN	NaN	NaN	NaN	NaN	NaN	NaN	NaN	NaN	NaN	NaN	NaN
hCG_2032701;STT3A	A0A024R3J7;P46977	Dolichyl-diphosphooligosaccharide--protein glycosyltransferase subunit STT3A	NaN	-0.71308	NaN	0.00894352	-0.10541	NaN	NaN	NaN	-0.377268	-1.01507	1.17677	-1.1149	NaN	-1.59311	-0.422556	NaN	0.903064	-0.284053	0.524657	2.87588	NaN	0.328779	-0.905766	-0.879	-0.313478	-0.839373	-0.486636	NaN	-0.339696	-1.2578	-0.816067	-0.494159	-0.753262	-1.65024	-1.12387	0.786248	-0.40806	NaN	-1.0859	-0.635895	-1.41963	1.2754	-2.87216	-1.39851	NaN	-1.12928
FXYD6	A0A024R3J8;Q9H0Q3	FXYD domain-containing ion transport regulator 6	NaN	NaN	NaN	NaN	NaN	NaN	NaN	NaN	NaN	NaN	NaN	NaN	NaN	NaN	NaN	NaN	NaN	NaN	NaN	NaN	NaN	NaN	NaN	NaN	NaN	NaN	NaN	NaN	NaN	NaN	NaN	NaN	NaN	NaN	NaN	NaN	NaN	NaN	NaN	NaN	NaN	NaN	NaN	NaN	NaN	NaN
VPS26B	A0A024R3L9;Q4G0F5	Vacuolar protein sorting-associated protein 26B	NaN	NaN	NaN	NaN	NaN	NaN	NaN	NaN	NaN	NaN	NaN	NaN	NaN	NaN	NaN	NaN	NaN	NaN	NaN	NaN	NaN	NaN	NaN	NaN	NaN	NaN	NaN	NaN	NaN	NaN	NaN	NaN	NaN	NaN	NaN	NaN	NaN	NaN	-0.332622	NaN	NaN	NaN	NaN	NaN	NaN	NaN
THYN1	A0A024R3M1;Q9P016	Thymocyte nuclear protein 1	NaN	NaN	-0.985501	NaN	-0.181166	NaN	NaN	NaN	NaN	NaN	-0.396379	0.212818	NaN	NaN	NaN	NaN	NaN	0.871865	0.600665	-0.716684	NaN	-0.231187	NaN	-0.561106	NaN	-1.10943	NaN	NaN	NaN	NaN	NaN	0.667034	1.87668	NaN	NaN	NaN	NaN	NaN	NaN	NaN	NaN	NaN	NaN	NaN	NaN	NaN
APLP2	B4DTV1;B4E3I5;A0A024R3N3;A0A140VJE9;Q06481;B4DKY3	Amyloid-like protein 2	NaN	NaN	NaN	NaN	NaN	-0.563353	NaN	NaN	NaN	NaN	NaN	NaN	NaN	NaN	NaN	NaN	NaN	NaN	0.491693	NaN	NaN	NaN	NaN	NaN	NaN	NaN	NaN	NaN	NaN	NaN	NaN	NaN	NaN	NaN	NaN	NaN	NaN	NaN	NaN	NaN	NaN	NaN	NaN	NaN	NaN	NaN
DEGS1	A0A024R3P1;O15121;E7EMA0	Sphingolipid delta(4)-desaturase DES1	NaN	NaN	NaN	NaN	NaN	NaN	NaN	NaN	NaN	NaN	NaN	NaN	NaN	NaN	NaN	NaN	NaN	NaN	NaN	NaN	NaN	NaN	NaN	NaN	NaN	NaN	NaN	NaN	NaN	NaN	NaN	NaN	NaN	NaN	NaN	NaN	NaN	NaN	NaN	NaN	NaN	NaN	NaN	NaN	NaN	NaN
LEFTY2;LEFTY1;Lefty1	A0A024R3P5;O00292;O75610;A0A0A0N0K8	Left-right determination factor 2;Left-right determination factor 1	NaN	NaN	NaN	NaN	0.613697	NaN	NaN	NaN	NaN	NaN	NaN	NaN	0.382457	NaN	NaN	NaN	NaN	NaN	NaN	NaN	NaN	NaN	NaN	0.624466	NaN	NaN	NaN	NaN	NaN	NaN	NaN	NaN	-0.095587	NaN	-0.180473	NaN	NaN	NaN	NaN	NaN	NaN	NaN	NaN	NaN	NaN	NaN
ACBD3	A0A024R3P9;Q9H3P7	Golgi resident protein GCP60	NaN	0.178241	NaN	NaN	1.79216	NaN	NaN	NaN	NaN	NaN	NaN	NaN	NaN	NaN	1.69862	NaN	NaN	NaN	NaN	NaN	NaN	NaN	NaN	1.24206	NaN	NaN	NaN	NaN	NaN	NaN	NaN	NaN	NaN	NaN	NaN	NaN	NaN	NaN	NaN	NaN	NaN	NaN	NaN	NaN	NaN	NaN
MRPL55	A0A024R3R0;Q7Z7F7;X6R631	39S ribosomal protein L55, mitochondrial	NaN	0.464146	-0.187134	NaN	1.30672	NaN	NaN	NaN	NaN	NaN	1.28458	NaN	1.15578	0.152061	NaN	1.03278	0.892339	0.807629	0.0655625	-0.648789	NaN	NaN	1.24564	0.363345	2.13968	1.40144	0.621266	-0.303342	-0.704872	2.93367	0.915065	0.708326	NaN	NaN	0.558007	NaN	NaN	NaN	0.575013	-0.633943	NaN	NaN	NaN	NaN	NaN	NaN
LBR	A0A024R3R5;Q14739;C9JXK0	Lamin-B receptor	-0.432959	-0.364124	NaN	-0.70855	0.0968996	-0.271545	NaN	NaN	NaN	-1.45001	1.76317	0.165295	0.183444	0.603687	NaN	-0.0249321	NaN	-0.395878	1.42688	2.79226	NaN	0.745479	-0.00533679	0.289262	NaN	-0.645828	-0.709486	1.71629	0.165244	-1.50934	0.0858182	0.297369	0.698272	-0.0803807	NaN	0.245985	0.234307	NaN	0.602116	NaN	1.46905	NaN	NaN	NaN	NaN	0.632595
C1orf198	A0A024R3S1;Q9H425	Uncharacterized protein C1orf198	NaN	NaN	NaN	NaN	NaN	NaN	NaN	NaN	NaN	NaN	NaN	NaN	NaN	NaN	NaN	NaN	NaN	NaN	NaN	NaN	NaN	NaN	NaN	NaN	NaN	NaN	NaN	NaN	NaN	NaN	NaN	NaN	NaN	NaN	NaN	NaN	NaN	NaN	NaN	NaN	NaN	NaN	NaN	NaN	NaN	NaN
CABC1;ADCK3	A0A024R3S3;Q8NI60;B4DVB7;A1L377;Q5T7A2;B4DED1;B4DN23	Atypical kinase ADCK3, mitochondrial	0.368019	0.672373	0.797875	1.46267	0.504279	1.11806	0.796335	0.632143	0.113137	0.585119	0.546157	0.568361	1.10247	0.883204	0.444268	0.450578	1.01606	0.617854	0.31758	0.830362	1.24428	0.727372	0.325414	1.23083	0.628095	1.23422	0.42884	0.691451	0.470417	0.709958	0.90313	0.188955	0.183642	0.909946	0.66487	0.688794	0.332076	0.323752	0.511536	0.58747	1.07848	0.35187	0.604304	0.808401	1.08072	0.993251
PARP1	A0A024R3T8;P09874;B4E0E1;B2R5W3	Poly [ADP-ribose] polymerase 1	-0.536188	-0.655079	-1.10048	-0.798553	-0.877601	-1.15698	-0.673222	-0.922156	-0.822586	-1.00892	-1.05108	-0.334265	-1.01078	-0.740385	-0.979035	-1.32609	-0.763846	-0.685242	-0.870827	-1.12861	-1.44424	-0.885652	-0.675185	-0.75065	-1.27878	-1.14383	-0.529353	-1.44405	-0.624407	-1.39432	-1.13951	-0.503187	-0.877082	-1.16286	-1.2481	-1.24151	-0.994286	-0.985359	-0.734497	-1.41957	-1.07063	-0.919381	-1.34879	-1.06325	-1.2571	-1.44193
GUK1;DKFZp666D023	Q6IBG8;B1ANH5;B1ANH0;B1ANG9;A0A024R3U5;Q16774;Q658U3;Q96IN2;B1ANH6;B1ANH2;B1ANH3	Guanylate kinase	NaN	-0.795351	NaN	-0.0836559	-2.0844	NaN	NaN	NaN	0.352879	NaN	0.00314849	NaN	-1.21307	NaN	NaN	NaN	NaN	-1.26321	-0.0846086	NaN	NaN	NaN	0.0094808	-0.448267	NaN	NaN	0.168867	NaN	-0.757279	NaN	NaN	-1.62335	0.107539	NaN	-0.332049	NaN	1.22418	NaN	-0.366598	NaN	-1.33176	NaN	-1.01207	NaN	-0.685447	NaN
FLJ22555;C2orf47	A0A024R3U8;Q8WWC4;H7C0V0	Uncharacterized protein C2orf47, mitochondrial	NaN	NaN	NaN	NaN	NaN	NaN	NaN	NaN	NaN	NaN	NaN	NaN	NaN	NaN	NaN	NaN	NaN	NaN	NaN	NaN	NaN	NaN	NaN	NaN	NaN	NaN	NaN	NaN	NaN	NaN	NaN	NaN	NaN	NaN	NaN	NaN	NaN	NaN	NaN	NaN	-0.985428	NaN	NaN	NaN	NaN	NaN
RAB4A	Q53GC2;A0A024R3U9;P20338;A0A0A1HAV9	Ras-related protein Rab-4A	NaN	NaN	NaN	NaN	NaN	NaN	NaN	NaN	1.08577	NaN	1.03419	NaN	NaN	-1.21593	NaN	NaN	NaN	-0.412402	NaN	NaN	NaN	NaN	NaN	NaN	-0.939528	NaN	NaN	NaN	NaN	-0.911883	NaN	NaN	NaN	NaN	NaN	NaN	NaN	NaN	NaN	NaN	NaN	NaN	NaN	NaN	NaN	NaN
DNAPTP6;SPATS2L	A0A024R3V0;Q9NUQ6;B8ZZZ7;C9JKE4;F8VT91	SPATS2-like protein	NaN	NaN	NaN	NaN	NaN	NaN	NaN	NaN	NaN	NaN	NaN	NaN	NaN	NaN	NaN	NaN	NaN	0.0173002	NaN	NaN	NaN	NaN	NaN	NaN	NaN	NaN	NaN	NaN	NaN	NaN	NaN	NaN	NaN	NaN	NaN	NaN	NaN	NaN	NaN	NaN	NaN	NaN	NaN	NaN	NaN	NaN
PPIL3	A0A024R3V4;Q9H2H8;B8ZZ77;A0A0S2Z5A8;H7BZ14;B4DN80;C9K058	Peptidyl-prolyl cis-trans isomerase;Peptidyl-prolyl cis-trans isomerase-like 3	-0.41579	-2.23539	NaN	NaN	NaN	NaN	NaN	-1.80443	-1.20583	NaN	-1.40644	NaN	-0.938625	-1.00396	NaN	-2.04061	-1.88159	-0.0597706	-0.861229	-1.44562	0.0583642	NaN	-0.440847	0.53389	NaN	-1.20075	-1.24266	-1.41101	-0.923491	-1.74024	-1.37922	-1.15088	NaN	NaN	-2.57403	-1.03647	-2.11443	NaN	-0.389236	-1.83244	NaN	-0.589859	NaN	NaN	NaN	-0.578601
NIF3L1;DKFZp762L015	E7EXA3;Q6X734;Q658J0;A0A024R3V5;A0A024R3V7;Q9GZT8	NIF3-like protein 1	NaN	NaN	NaN	NaN	NaN	NaN	NaN	NaN	NaN	NaN	NaN	NaN	NaN	NaN	NaN	NaN	NaN	NaN	NaN	0.970045	NaN	NaN	NaN	NaN	NaN	NaN	NaN	NaN	NaN	NaN	NaN	NaN	NaN	0.408072	NaN	NaN	NaN	NaN	NaN	NaN	-1.01771	NaN	-1.06029	NaN	NaN	NaN
DISC1;TSNAX	C4P0D6;C4P0D8;A0A024R3V8;Q99598;C4P0D4;Q5VVQ1	Translin-associated protein X	NaN	-0.464457	NaN	NaN	0.0841527	NaN	NaN	NaN	-0.742179	-1.54374	1.7598	NaN	-0.000865332	NaN	NaN	NaN	NaN	-0.259905	NaN	NaN	NaN	NaN	0.391872	0.243079	NaN	NaN	0.966081	NaN	NaN	NaN	NaN	-0.921817	0.0919865	NaN	NaN	NaN	NaN	NaN	NaN	NaN	NaN	NaN	NaN	NaN	NaN	NaN
TOMM20	A0A024R3W2;Q15388	Mitochondrial import receptor subunit TOM20 homolog	NaN	NaN	NaN	NaN	NaN	NaN	NaN	NaN	NaN	NaN	NaN	NaN	NaN	NaN	NaN	NaN	NaN	NaN	NaN	NaN	NaN	NaN	NaN	NaN	NaN	NaN	NaN	NaN	NaN	NaN	NaN	NaN	NaN	NaN	NaN	NaN	NaN	NaN	NaN	NaN	NaN	NaN	NaN	NaN	NaN	NaN
NRP2;DKFZp686J1169	A0A024R412;A0A024R3W6;X5D7M1;Q7LBX6;B7ZL68;X5D2Q8;O60462;Q7Z3T9;A8K4G9	Neuropilin-2	NaN	0.807604	NaN	NaN	NaN	NaN	NaN	NaN	NaN	NaN	0.835034	NaN	1.26493	NaN	NaN	NaN	NaN	0.00798571	NaN	NaN	NaN	NaN	NaN	0.675627	NaN	NaN	NaN	NaN	NaN	NaN	0.963054	NaN	NaN	NaN	NaN	NaN	NaN	NaN	NaN	NaN	NaN	NaN	NaN	NaN	NaN	NaN
EEF1B2;LOC392793	A0A024R3W7;P24534;A4D1M6	Elongation factor 1-beta	-0.734805	0.633554	-0.85894	0.0776519	0.484096	-0.413387	0.17973	-0.533237	-0.249334	-0.0748525	-0.613842	-0.197655	0.188067	-0.385131	0.029677	-0.898241	-0.584759	-0.198507	-0.320661	-0.574328	-0.629822	-0.0612796	-0.305377	-0.701725	-0.933649	-0.673088	-0.055085	-0.643668	-0.253466	-0.340859	-0.956943	-0.330694	-0.230925	-0.358408	0.094034	-1.05809	0.0200176	-0.762614	-0.0694314	-0.816618	-0.697623	-0.410761	-0.799971	-0.427577	-0.622442	-0.344093
ADAM23	Q53TC0;B4DL48;E7EWD3;A0A024R3W8;O75077	Disintegrin and metalloproteinase domain-containing protein 23	NaN	NaN	NaN	NaN	NaN	NaN	NaN	NaN	NaN	NaN	NaN	NaN	NaN	NaN	NaN	NaN	NaN	NaN	NaN	NaN	NaN	NaN	NaN	NaN	NaN	NaN	NaN	NaN	NaN	NaN	NaN	NaN	NaN	NaN	NaN	NaN	NaN	NaN	NaN	NaN	NaN	NaN	NaN	NaN	NaN	NaN
HSPD1	A0A024R3X4;P10809;B3GQS7;B7Z597;B7Z5E7;B7Z4F6	60 kDa heat shock protein, mitochondrial	-0.420085	0.103661	-0.43984	-0.0358532	0.170982	-0.175363	0.131127	-0.245801	-0.259756	-0.211611	0.0768118	0.220005	-0.0335686	0.177736	-0.0958412	-0.422565	0.390954	-0.198914	-0.162164	-0.172473	-0.40965	-0.11487	-0.344656	-0.100979	-0.390152	-0.207068	0.335172	-0.525025	0.0431698	-0.163521	-0.238907	0.085118	0.176646	-0.131683	0.0211565	-0.244607	0.18128	-0.132973	0.242779	-0.245186	-0.205531	-0.119088	-0.400725	-0.127196	-0.31107	0.0294208
SUMO1	A0A024R3Z2;B8ZZN6;P63165;B8ZZJ0;B8ZZ67;B9A032;G2XKQ0	Small ubiquitin-related modifier 1;Small ubiquitin-related modifier	NaN	1.06871	NaN	0.611403	NaN	NaN	NaN	NaN	NaN	NaN	-0.495797	NaN	-0.0150693	NaN	NaN	NaN	NaN	1.61184	NaN	NaN	NaN	NaN	0.619076	-1.48764	-0.975777	NaN	0.0997263	-0.232415	NaN	NaN	NaN	NaN	-1.25344	NaN	NaN	NaN	NaN	NaN	NaN	NaN	NaN	NaN	NaN	NaN	NaN	NaN
LANCL1	E9PHS0;Q6FHH6;Q53TN2;B2R602;A0A024R3Z5;O43813;F8WDS9;B4DGM7	LanC-like protein 1	-0.267552	0.151109	-0.0222825	-0.410884	-0.015783	-0.197191	-0.196607	-1.00267	-0.480226	-0.351406	0.157892	-0.133646	0.0563348	-0.567838	-0.785258	-0.257422	NaN	-0.281216	-0.457857	-0.690819	-0.109172	0.105917	-0.123412	-0.714217	-0.364939	-0.642514	0.0163368	-0.503626	-0.0900778	-0.352984	-0.246375	-0.491602	NaN	-0.558833	-0.591362	-0.362962	-0.350724	-0.510456	-0.436902	-0.898072	-1.73367	-0.508017	-1.18054	-0.778752	-1.37546	-0.769944
BZW1;hCG_2022736	A0A024R3Z6;Q53FN7;Q7L1Q6;D3DN77;C9IZ80;B3KU41;C9JFN4	Basic leucine zipper and W2 domain-containing protein 1	NaN	NaN	NaN	NaN	-0.737773	NaN	1.5917	-1.9658	NaN	NaN	NaN	NaN	-0.949124	-0.772392	0.746398	NaN	NaN	0.803116	-0.615228	NaN	NaN	NaN	NaN	0.320612	NaN	NaN	NaN	NaN	NaN	NaN	-0.42707	NaN	NaN	NaN	NaN	NaN	NaN	NaN	-0.0394156	NaN	-0.395173	NaN	NaN	NaN	NaN	NaN
NDUFB3	A0A024R413;O43676;C9JKQ2	NADH dehydrogenase [ubiquinone] 1 beta subcomplex subunit 3	0.237825	-0.395313	0.14037	0.0773717	-0.195218	0.405354	1.16427	-0.076304	0.141268	0.14162	0.0642687	0.668717	-0.130516	0.249428	0.669901	0.0896553	-0.158712	-0.461301	0.0604396	-0.348985	0.150229	0.715978	-0.25149	0.289765	0.65428	-0.16528	-1.01912	-0.448059	0.187842	0.119844	-0.564246	-0.389117	0.4677	0.198431	-0.373982	0.363	-0.16849	-0.0487403	0.438176	0.327542	-0.333719	-0.189426	-0.424104	-0.166844	0.144748	-0.294807
PNKD	A0A024R415;Q8N490	Probable hydrolase PNKD	NaN	NaN	NaN	NaN	NaN	NaN	NaN	NaN	NaN	NaN	NaN	NaN	NaN	NaN	NaN	NaN	NaN	NaN	NaN	NaN	NaN	NaN	NaN	NaN	NaN	NaN	NaN	NaN	NaN	NaN	NaN	NaN	NaN	NaN	NaN	NaN	NaN	NaN	NaN	NaN	NaN	NaN	NaN	NaN	NaN	NaN
KIAA0971;FASTKD2	B3KMB8;A0A024R419;Q9NYY8	FAST kinase domain-containing protein 2	NaN	NaN	NaN	NaN	NaN	NaN	NaN	NaN	NaN	NaN	NaN	NaN	NaN	NaN	NaN	NaN	NaN	NaN	NaN	NaN	NaN	NaN	NaN	NaN	NaN	NaN	NaN	NaN	NaN	NaN	NaN	NaN	NaN	NaN	NaN	NaN	NaN	NaN	NaN	NaN	-0.535854	NaN	NaN	NaN	NaN	NaN
IGFBP5	A0A024R433;P24593;C9JXX4	Insulin-like growth factor-binding protein 5	-0.814591	1.48496	-0.348119	-0.829741	-0.204093	0.705876	-0.707525	-0.916823	-0.485613	0.0386106	0.624555	0.439588	1.12651	-0.342276	-1.07852	-0.708996	0.647284	-1.56516	0.690534	-0.0938305	NaN	0.139116	0.400613	-0.839479	-1.06136	-1.62101	-0.213264	0.250148	0.261653	-1.36093	-1.28942	-0.179893	0.290395	-0.629312	0.230894	-0.930851	1.20075	-0.465713	0.15113	NaN	-2.32662	-0.101551	-1.37172	-1.15704	NaN	-0.427817
ABCB6	A0A024R436;H7BXK9;Q9NP58	ATP-binding cassette sub-family B member 6, mitochondrial	NaN	NaN	NaN	-2.14906	NaN	NaN	NaN	NaN	-1.00583	NaN	-0.272979	NaN	NaN	-0.433066	NaN	NaN	NaN	NaN	NaN	NaN	NaN	NaN	-0.764771	-1.91399	NaN	NaN	-0.126444	NaN	NaN	-0.890563	NaN	-1.40958	-0.254195	NaN	NaN	NaN	-0.416624	NaN	NaN	NaN	NaN	NaN	NaN	NaN	NaN	NaN
DNPEP	A0A024R442;Q53SB6;E7ETB3;B7Z7F0;Q9ULA0;Q9BSS9;E7EMB6;A0A024R443;Q9NV55;Q9HAC6;B9ZVU2;F8WAN0;B7Z822;E7EPX3;C9JBE1	Aspartyl aminopeptidase	-1.42709	-0.308264	-0.5709	-1.44244	-0.335712	-1.36058	-1.15656	-0.625008	-1.23377	-0.637833	-0.767336	-0.405427	-0.0387989	-1.46101	-1.38015	-1.4937	-1.11187	-0.435968	-0.917188	-1.12747	-0.213026	-0.401845	-0.705899	-0.686724	-2.00337	-0.887222	-0.652273	-1.52627	-1.23878	-1.39557	-1.59503	-0.532907	-0.997012	-1.41	-0.670533	-1.19665	-1.26303	-1.57913	-0.588579	-1.0898	-0.400636	0.0730308	-0.611365	-0.301073	-0.938098	-0.426246
CPS1	Q5R210;Q5R208;Q5R206;A8K134;A0A024R454;P31327;Q5R209;Q5R207	Carbamoyl-phosphate synthase [ammonia], mitochondrial	2.6056	3.10537	1.69424	2.84236	3.11408	2.62993	3.10644	2.5829	2.86246	2.62576	2.50176	3.21608	2.81676	3.23	2.8654	1.74569	3.48108	2.57746	2.11691	0.174087	NaN	2.73889	2.40927	2.44555	1.82673	1.7575	2.83671	2.01493	1.96505	2.00472	1.87837	2.78543	2.42405	2.21203	2.38534	1.71545	2.57104	1.90066	2.28065	1.54097	0.834659	1.90904	1.54696	1.37996	NaN	2.11835
FN1;DKFZp686O12165;DKFZp686L11144;DKFZp686O13149	A0A024R462;B7ZLE5;P02751;Q6MZM7;Q6N084;Q68CX6	Fibronectin;Anastellin;Ugl-Y1;Ugl-Y2;Ugl-Y3	0.913564	1.19668	0.489166	0.978276	1.16579	0.630263	1.79794	0.666468	0.924801	0.943754	1.11724	1.62671	1.25921	1.2538	0.690688	0.562538	1.57703	0.632208	2.30563	0.835829	0.449814	1.45017	0.841765	0.853472	0.643394	0.427449	1.36022	0.433971	1.48833	0.852441	0.611034	0.883819	1.01542	0.718764	1.16981	0.765802	1.8558	1.0829	1.31227	0.488338	0.506218	1.56545	0.241654	2.04275	0.93519	2.28952
ITM2C	B8ZZM6;A0A024R466;Q9NQX7;E7EUS6;B4DIB1	Integral membrane protein 2C;CT-BRI3	NaN	NaN	NaN	NaN	NaN	NaN	NaN	NaN	NaN	NaN	NaN	NaN	NaN	NaN	NaN	NaN	NaN	NaN	NaN	NaN	NaN	NaN	NaN	NaN	NaN	NaN	NaN	NaN	NaN	NaN	NaN	NaN	NaN	NaN	NaN	NaN	NaN	NaN	NaN	NaN	NaN	NaN	NaN	NaN	NaN	NaN
BCS1L	Q53EX1;A8JZZ8;A0A024R467;Q9Y276;H7C492	Mitochondrial chaperone BCS1	0.777046	-1.18328	0.651201	-0.223092	0.810783	0.319272	NaN	-0.0155906	1.07498	0.756116	1.3404	0.878438	0.433866	1.68038	0.108845	0.0986053	1.6316	0.193618	-0.0618453	0.0103427	-0.328722	NaN	0.0374758	0.305993	-0.0994973	-0.495183	0.54364	NaN	-0.153287	-0.182555	-0.0951817	-0.368407	0.430618	0.201546	-0.166201	-0.656857	0.0194566	-0.376735	0.217273	-0.918692	-0.523035	-0.497229	-0.958969	0.592685	-0.304853	-0.391548
CHPF;OBSL1	A0A024R468;A8MSZ8		NaN	NaN	NaN	NaN	NaN	NaN	NaN	NaN	NaN	NaN	NaN	NaN	NaN	NaN	NaN	NaN	NaN	NaN	NaN	NaN	NaN	NaN	NaN	NaN	NaN	NaN	NaN	NaN	NaN	NaN	NaN	NaN	NaN	NaN	NaN	NaN	NaN	NaN	NaN	NaN	NaN	NaN	NaN	NaN	NaN	NaN
COPS7B	J3KQ34;A0A024R471;Q9H9Q2;Q53GQ2;B3KW51;B3KV02;A0A024R478;J3QT73;A0A087X1P5	COP9 signalosome complex subunit 7b	NaN	NaN	-0.667574	NaN	NaN	-0.491083	NaN	0.645367	0.623799	0.608368	-0.455123	0.810106	NaN	NaN	NaN	NaN	NaN	0.884754	NaN	-0.704345	NaN	NaN	0.620934	NaN	NaN	NaN	NaN	NaN	NaN	NaN	NaN	NaN	NaN	NaN	NaN	NaN	NaN	NaN	NaN	NaN	NaN	NaN	NaN	NaN	NaN	NaN
MRPL44	A0A024R473;Q9H9J2	39S ribosomal protein L44, mitochondrial	-0.17799	NaN	0.0345157	1.5412	1.11185	0.583146	NaN	NaN	NaN	-1.15956	0.60697	-0.202136	NaN	1.73236	1.11488	-0.268764	1.6114	0.417579	-0.170746	0.887224	-0.612916	0.364155	-0.37362	0.473009	-0.502229	-0.00217748	-0.511468	0.529302	-0.052555	NaN	-1.13251	1.06691	-0.883934	0.820565	NaN	NaN	NaN	NaN	NaN	NaN	0.582527	0.829459	NaN	NaN	NaN	NaN
CUL3	Q53S54;A0A024R475;Q13618;B7Z600	Cullin-3	-0.0600475	0.567646	NaN	-0.0405417	0.790534	-0.521199	-0.049352	-0.479928	NaN	-0.598365	-0.201866	0.909011	NaN	NaN	NaN	NaN	NaN	NaN	0.495085	-0.450705	1.80637	NaN	-0.280481	1.45135	0.298566	-1.35348	NaN	-1.65347	1.96934	NaN	0.125012	NaN	NaN	-1.50381	NaN	-2.12452	NaN	NaN	-0.147046	-1.4654	-1.32158	-0.848348	-1.82155	-0.861876	NaN	NaN
GMPPA	A0A024R482;Q96IJ6;A0A087WUI8	Mannose-1-phosphate guanyltransferase alpha	NaN	NaN	NaN	NaN	NaN	NaN	NaN	NaN	NaN	NaN	0.0864001	NaN	NaN	NaN	NaN	NaN	NaN	NaN	NaN	NaN	NaN	NaN	NaN	NaN	NaN	NaN	NaN	NaN	NaN	NaN	NaN	NaN	NaN	NaN	NaN	NaN	NaN	NaN	NaN	NaN	NaN	NaN	NaN	NaN	NaN	NaN
C2orf33;MFF	A0A024R491;Q9GZY8	Mitochondrial fission factor	-2.28897	-2.51945	NaN	-1.42155	-2.30152	-2.90839	NaN	-1.94426	-3.85128	-0.712365	2.3325	NaN	-1.62676	-2.48478	-1.34568	NaN	-1.49917	-0.882442	NaN	1.67116	NaN	NaN	NaN	NaN	NaN	NaN	-2.42471	NaN	-1.53774	-2.43715	-2.45014	-1.81129	-0.55581	-0.973311	-1.79735	-1.11143	-2.25142	-1.28818	-1.78495	-1.24257	-2.6423	NaN	NaN	NaN	NaN	-2.27718
CAB39	A0A024R496;Q9Y376;A0A087X0K1;Q7Z4X0	Calcium-binding protein 39	NaN	NaN	NaN	NaN	NaN	NaN	NaN	NaN	NaN	NaN	NaN	NaN	NaN	NaN	NaN	NaN	NaN	NaN	NaN	NaN	NaN	NaN	NaN	NaN	NaN	NaN	NaN	NaN	NaN	NaN	NaN	NaN	NaN	NaN	NaN	NaN	NaN	NaN	NaN	NaN	NaN	NaN	NaN	NaN	NaN	NaN
ACSL3	B3KN05;B2RBE0;A0A024R497;O95573	Long-chain-fatty-acid--CoA ligase 3	NaN	0.88702	NaN	NaN	NaN	-0.745108	0.903738	1.12425	0.779769	NaN	0.122073	0.520193	0.102341	NaN	NaN	NaN	1.55941	0.411032	0.1435	0.2541	0.0851753	NaN	-0.583808	0.0756254	0.244377	0.0915433	0.848418	-0.253263	NaN	0.49478	-0.563256	-0.412363	-0.0289935	0.862549	-0.0146772	-0.467384	0.230062	NaN	0.457831	NaN	-0.737341	-1.2475	NaN	NaN	NaN	NaN
NCL	A0A024R4A0;P19338;B3KTP9;B3KM80;Q6ZS99;Q9BQ02;H7BY16	Nucleolin	-0.186611	-1.2086	-1.26144	-1.50504	-1.13877	-2.11877	-0.52929	-1.89787	-1.75655	-1.1024	-0.463542	-1.03872	-1.61904	-1.86855	-1.99787	-1.73781	-0.670003	-1.75985	-1.07476	-1.56017	-2.84508	-1.33779	-1.74923	-1.95681	-1.32357	-1.5834	-1.29454	-1.7564	-0.944214	-1.78325	-1.76488	-1.10437	-1.09574	-1.76795	-1.16641	-1.51348	-0.874177	-1.42455	-1.40415	-1.50175	-1.03048	-0.613791	-1.83248	-1.2183	-1.55566	-0.906154
TNRC15;GIGYF2	A0A024R4A5;Q6Y7W6;I1E4Y6;B4DRT8;E7ESB6	PERQ amino acid-rich with GYF domain-containing protein 2	NaN	NaN	NaN	NaN	NaN	NaN	NaN	NaN	NaN	NaN	NaN	NaN	NaN	NaN	NaN	NaN	NaN	NaN	NaN	NaN	NaN	NaN	NaN	NaN	NaN	NaN	NaN	NaN	NaN	NaN	NaN	NaN	NaN	NaN	NaN	NaN	NaN	NaN	NaN	NaN	NaN	NaN	NaN	NaN	NaN	NaN
POLR3C	E9PHH9;A0A024R4C1;Q9BUI4;Q9BT08;Q53F76	DNA-directed RNA polymerase III subunit RPC3	NaN	NaN	NaN	NaN	NaN	NaN	NaN	NaN	NaN	NaN	NaN	NaN	NaN	NaN	NaN	NaN	NaN	NaN	NaN	NaN	NaN	NaN	NaN	NaN	NaN	NaN	NaN	NaN	NaN	NaN	NaN	NaN	NaN	NaN	NaN	NaN	NaN	NaN	NaN	NaN	NaN	NaN	NaN	NaN	NaN	NaN
COPS8	E9PGT6;B2R8N1;A0A024R4D1;Q99627;H7C3S9	COP9 signalosome complex subunit 8	NaN	-0.486148	NaN	-1.20677	NaN	-1.48821	NaN	NaN	-0.80364	1.51825	-0.00942373	-0.598365	-1.4062	-0.151209	-0.535634	-2.25831	-0.0946811	-1.36977	-1.66964	NaN	1.18753	-0.0913503	-0.204153	-0.709326	-0.142609	-1.00504	-0.00347725	-1.4964	0.0572565	-0.630291	-0.712446	-0.851843	-1.2407	-1.81484	-1.78866	-2.15347	-0.435968	-1.0432	-1.75334	NaN	-1.81143	0.598626	NaN	-1.16672	NaN	-0.115891
CTNNBIP1	A0A024R4D7;Q9NSA3	Beta-catenin-interacting protein 1	NaN	NaN	NaN	NaN	NaN	NaN	NaN	NaN	NaN	NaN	NaN	NaN	NaN	NaN	NaN	NaN	NaN	NaN	NaN	NaN	NaN	NaN	NaN	NaN	NaN	NaN	NaN	NaN	NaN	NaN	NaN	NaN	NaN	NaN	NaN	NaN	NaN	NaN	NaN	NaN	NaN	NaN	NaN	NaN	NaN	NaN
NMNAT1	Q53GL1;A0A024R4E1;Q9HAN9	Nicotinamide-nucleotide adenylyltransferase;Nicotinamide/nicotinic acid mononucleotide adenylyltransferase 1	NaN	NaN	NaN	NaN	NaN	NaN	NaN	NaN	NaN	NaN	NaN	NaN	NaN	NaN	NaN	NaN	NaN	NaN	NaN	NaN	NaN	NaN	NaN	NaN	NaN	NaN	NaN	NaN	NaN	NaN	NaN	NaN	NaN	NaN	NaN	NaN	NaN	NaN	NaN	NaN	NaN	NaN	NaN	NaN	NaN	NaN
TDP43;TARDBP	A0A0A0N0L3;A0A024R4E2;Q13148;A0A087WX29;B1AKP7;G3V162;A0A087X260;A0A087WYY0;K7EJM5;A0A0A0N0N3;A0A0A0N0M3;B4DRW3;A0A087WXQ5;A0A087WV68	TAR DNA-binding protein 43	0.751809	0.918513	-0.751468	1.25096	0.699347	0.571066	1.9495	1.32318	0.528624	0.706256	0.743692	1.4293	0.216457	1.04947	0.441505	1.91577	1.0976	0.511829	0.53106	0.448808	2.47409	1.77422	0.845788	1.11749	-0.269512	-1.10008	0.62029	0.675766	0.111136	-0.539035	-1.018	0.937015	0.0518789	-0.629248	-0.787182	-0.0529933	-0.391607	-1.02609	0.6455	0.128084	-0.0383275	-0.190245	-0.133853	0.226733	0.231013	0.254471
HDLBP	B2R5V9;A0A024R4E5;Q00341;H0Y394;B4DKR8;Q6ZS03;Q96CF6	Vigilin	-0.622735	-0.280872	1.37296	0.437845	0.457322	-0.213708	NaN	0.18772	-0.227617	0.0274963	0.533487	0.164165	0.268649	0.0193122	0.165332	-0.602078	1.21063	-0.285019	-0.369001	1.87918	-1.91261	NaN	0.229885	0.174977	-0.740847	-0.371431	0.343656	-0.510208	-0.139075	-0.456135	-0.243508	-0.405582	0.078913	-1.23428	-0.552517	-0.473136	0.256707	0.552727	0.1493	-0.989976	0.177689	-0.759605	-0.631346	NaN	-0.563353	0.133195
PEX11B	A0A024R4E7;O96011	Peroxisomal membrane protein 11B	NaN	1.18708	NaN	NaN	NaN	NaN	NaN	NaN	NaN	NaN	NaN	NaN	NaN	NaN	NaN	NaN	NaN	NaN	NaN	NaN	NaN	NaN	NaN	NaN	NaN	NaN	NaN	NaN	NaN	NaN	NaN	NaN	NaN	NaN	NaN	NaN	NaN	NaN	NaN	NaN	NaN	NaN	NaN	NaN	NaN	NaN
ENO1	A0A024R4F1;P06733;E2DRY6	Alpha-enolase;Enolase	-0.93065	-0.795203	-1.14831	-0.827719	-0.800767	-1.0235	-0.668191	-1.25405	-1.06136	-1.11857	-0.826938	-0.510278	-1.00628	-0.848929	-0.876567	-1.24203	-0.718806	-0.864851	-0.832056	-0.874278	-1.47905	-1.10257	-0.948764	-0.935474	-1.28415	-1.38802	-0.715571	-1.47674	-1.00052	-1.14177	-1.17654	-0.894046	-0.789828	-1.01195	-0.997589	-1.39526	-0.911211	-1.16142	-0.903264	-1.44779	-1.42595	-0.963643	-1.52209	-0.980351	-1.18779	-1.0211
LRRC47	A0A024R4G1;Q8N1G4	Leucine-rich repeat-containing protein 47	-0.51853	-0.36334	-1.39692	-0.772537	-1.40953	-0.503581	-0.0918936	-0.424526	-1.05024	-0.256411	-0.370243	-0.462499	-1.1189	-0.138617	-0.414528	-0.160225	-0.0226953	-0.555269	-0.61994	-0.313948	-0.206215	-0.292283	-0.583946	-0.673147	-0.679728	-0.793188	-0.466042	-0.721289	-0.92136	-0.778603	-0.55385	-0.803479	-0.704124	-0.699929	-0.442766	-0.767328	-0.151638	-0.916801	-0.771225	-0.653283	-0.764732	-0.943207	-1.34591	-0.783399	-0.841605	-0.939801
PLOD1	A0A024R4H0;Q02809;B2R5M9;B4DGN8;B4DHT1	Procollagen-lysine,2-oxoglutarate 5-dioxygenase 1	0.830285	0.270899	0.182012	0.38314	0.90703	-0.697772	-0.273394	-0.828624	-0.436859	-0.546006	0.148422	0.00818753	0.871347	0.895405	-0.397697	-0.440757	1.13387	-0.20568	-0.253695	-0.0647479	-0.113701	-0.290515	0.475221	-0.477084	-0.849087	-1.31656	-0.173972	-0.663393	-0.612878	-0.742696	-0.387468	-0.193448	0.184639	-0.868994	-0.580974	-1.69108	-0.588542	0.0960785	-0.648124	-1.58256	-0.155973	-0.136286	-0.822477	-0.776978	-0.751207	-1.22754
LZIC	A0A024R4I7;Q8WZA0	Protein LZIC	NaN	NaN	NaN	NaN	NaN	NaN	NaN	NaN	NaN	NaN	NaN	-0.722204	NaN	NaN	NaN	NaN	NaN	NaN	NaN	NaN	NaN	NaN	-0.978488	NaN	NaN	NaN	NaN	NaN	NaN	NaN	NaN	NaN	NaN	NaN	NaN	NaN	NaN	NaN	NaN	NaN	NaN	NaN	NaN	NaN	NaN	NaN
MDH2	Q75MT9;Q6FHZ0;A0A024R4K3;P40926;Q0QF37;G3XAL0;B3KTM1	Malate dehydrogenase;Malate dehydrogenase, mitochondrial	-0.209596	0.123004	-0.506182	0.0792517	0.0598345	-0.318211	-0.0865999	-0.278444	-0.135414	-0.379873	-0.183421	0.105138	-0.158289	0.169882	0.0266134	-0.0539271	0.135869	0.116342	-0.164058	-0.306839	-0.520549	-0.176109	0.030035	-0.248324	-0.177559	0.11103	0.33517	-0.223355	0.022603	0.258416	0.000558279	-0.0364174	0.471531	0.293662	0.30636	-0.24169	0.387809	0.0696762	0.284539	0.170274	0.23832	-0.0190134	0.0253477	0.280543	0.290011	0.268859
TMPIT;TMEM120A	A0A024R4K9;A0A087WWH9;A0A087WZA9		NaN	NaN	NaN	NaN	NaN	NaN	NaN	NaN	NaN	NaN	NaN	NaN	NaN	NaN	NaN	NaN	NaN	NaN	NaN	NaN	NaN	NaN	NaN	NaN	NaN	NaN	NaN	NaN	NaN	NaN	NaN	NaN	NaN	NaN	NaN	NaN	NaN	NaN	NaN	NaN	NaN	NaN	NaN	NaN	NaN	NaN
RPS9	A0A024R4M0;P46781;B5MCT8;C9JM19;B7Z732;A5D904	40S ribosomal protein S9	0.311378	-0.0280386	0.161911	-0.250396	-0.420464	-0.299191	0.230975	-0.189382	-0.233024	-0.450196	0.329748	0.252008	-1.28379	0.0943835	-0.00103553	-0.14612	0.206673	-0.551714	0.668146	-0.268019	-0.411354	-0.275992	-0.159933	-0.454892	0.0240306	-0.268961	0.0517392	-0.654386	0.0399274	0.149398	-0.328055	-0.240129	-0.0510072	-0.342573	-0.300882	-0.905934	0.110855	-0.557876	-0.46338	-0.848184	-0.0819781	0.191475	-0.353092	-0.346163	-0.963447	-0.313591
RDH13	A0A024R4M8;Q8NBN7;B2RDH1;G8JLA1	Retinol dehydrogenase 13	0.370446	-0.66166	-0.0758784	-0.223844	-0.123929	-0.779512	-0.208392	0.376077	-0.0975781	-0.38357	-0.219033	-0.184804	0.122024	-0.273323	-0.942043	-0.467483	-0.208438	-0.302534	-1.08965	-0.689359	0.105538	-0.0769677	0.476463	-0.297282	-0.76752	-0.565609	-0.0554984	-1.36873	-0.755193	-1.06082	-0.153926	-0.149693	-0.399389	-0.733757	-0.489748	0.0160636	-0.1093	0.42512	0.256722	-0.261951	0.1939	-0.0965151	0.326593	0.244519	-0.245182	0.20204
hCG_1640809;MYADM	B4DG42;A0A024R4N0;Q96S97;C9JJV6;C9JZL8;C9J5M0;C9JC07	Myeloid-associated differentiation marker	NaN	0.742796	-0.673104	NaN	NaN	-1.74584	NaN	-0.83875	NaN	NaN	-1.29119	NaN	-0.786931	NaN	NaN	NaN	NaN	NaN	-0.539361	-0.775347	NaN	NaN	NaN	NaN	NaN	-1.02277	NaN	NaN	NaN	NaN	NaN	NaN	NaN	NaN	NaN	NaN	NaN	NaN	NaN	NaN	NaN	-1.14516	NaN	NaN	NaN	NaN
RPS5	M0R0F0;A0A024R4Q8;P46782;Q53G25;M0R0R2;M0QZN2	40S ribosomal protein S5;40S ribosomal protein S5, N-terminally processed	0.223163	-0.0779098	-0.494682	-0.0883246	-0.468486	-0.856397	-0.513592	-0.638642	-1.03416	-0.608534	0.0032233	0.0376261	-0.393672	-0.589546	-0.408995	-1.33003	-0.180036	-0.969255	-0.239016	-0.930942	-0.627847	-0.664499	-0.553913	-0.479863	-0.439091	-0.859626	-0.248939	-0.732386	-0.0903198	0.0337823	-0.775563	-0.448561	-0.618024	-0.308392	-0.476674	-0.518532	-0.213137	-0.580913	-0.476705	-1.06464	-0.653435	-0.686325	-0.872819	-0.410904	-0.779987	-0.150203
CNOT3;FLJ00420	H7C3F5;Q6ZMJ6;B7Z6J7;A0A024R4R3;O75175;H0Y5X7	CCR4-NOT transcription complex subunit 3	NaN	NaN	NaN	NaN	NaN	NaN	NaN	NaN	NaN	NaN	-0.804549	NaN	NaN	NaN	NaN	NaN	NaN	NaN	NaN	NaN	NaN	NaN	NaN	NaN	NaN	NaN	NaN	NaN	NaN	NaN	NaN	NaN	NaN	NaN	NaN	NaN	NaN	NaN	NaN	NaN	NaN	NaN	NaN	NaN	NaN	NaN
CHMP2A	A0A024R4S0;M0R1T5;O43633	Charged multivesicular body protein 2a	-1.77011	-0.509341	-0.424815	NaN	NaN	NaN	NaN	NaN	NaN	-0.162406	-1.32683	-1.05012	NaN	NaN	NaN	-0.479955	NaN	NaN	-0.336169	NaN	NaN	NaN	NaN	NaN	-0.840604	NaN	NaN	-0.692606	NaN	NaN	NaN	-0.277628	NaN	-0.43189	NaN	-1.25363	NaN	NaN	-0.862352	-1.08107	NaN	NaN	NaN	NaN	NaN	NaN
EPN1	A0A024R4S1;Q9Y6I3;B4DU91	Epsin-1	NaN	1.49586	NaN	NaN	NaN	NaN	NaN	NaN	NaN	NaN	NaN	NaN	0.156804	0.887313	NaN	NaN	NaN	NaN	NaN	NaN	NaN	NaN	0.467214	NaN	-1.26834	NaN	2.19416	NaN	NaN	NaN	NaN	0.299738	0.972846	NaN	NaN	NaN	NaN	NaN	NaN	NaN	NaN	NaN	NaN	NaN	NaN	NaN
UBE2M	A0A024R4T4;P61081	NEDD8-conjugating enzyme Ubc12	-0.202473	-1.1382	-0.668527	0.497719	0.685095	-1.27931	-0.033793	-0.342667	1.37408	-0.63812	-0.498353	1.08568	-0.594861	NaN	-0.368534	-0.860468	0.319713	-1.46796	-0.795268	-0.691981	-0.0310879	0.788608	0.217425	-1.16729	NaN	-1.4502	-0.289514	-1.33226	-0.539238	-1.79252	-1.04147	0.848841	-0.424922	-1.09596	1.41779	NaN	NaN	NaN	-0.454597	-1.76141	0.938791	-0.443967	NaN	1.64399	NaN	-0.643363
TTLL12	A0A024R4U3;Q14166	Tubulin--tyrosine ligase-like protein 12	-0.321813	NaN	0.821457	NaN	-0.995882	-3.02724	NaN	0.315069	-0.785592	-0.424277	0.44099	-0.374913	0.105401	0.0613603	NaN	NaN	0.719756	-1.4143	-0.0331952	0.392042	0.138772	-0.620886	-0.480885	-0.5308	-1.46493	-1.06045	NaN	-0.550901	-0.667413	NaN	-1.39895	-1.16363	-0.91173	-1.41597	NaN	-0.404453	-0.353889	-1.40186	NaN	NaN	0.0272071	-1.3011	NaN	NaN	0.0203404	-0.401728
FLJ20699;TTC38	B4DUE0;A0A024R4V7;Q5R3I4;A9UJP8	Tetratricopeptide repeat protein 38	NaN	NaN	NaN	NaN	NaN	NaN	NaN	NaN	NaN	NaN	NaN	NaN	NaN	NaN	NaN	NaN	NaN	NaN	NaN	NaN	NaN	NaN	NaN	NaN	NaN	NaN	NaN	NaN	NaN	NaN	NaN	NaN	NaN	NaN	NaN	NaN	NaN	NaN	NaN	NaN	NaN	NaN	NaN	NaN	NaN	NaN
SAPS2;PPP6R2	A0A024R4W0;T1ECW5;O75170;B3KMU0;A0A0A0MSJ8;B3KMJ7	Serine/threonine-protein phosphatase 6 regulatory subunit 2	NaN	NaN	NaN	NaN	NaN	NaN	NaN	NaN	NaN	NaN	NaN	NaN	NaN	NaN	NaN	NaN	NaN	NaN	NaN	NaN	NaN	NaN	NaN	NaN	NaN	NaN	NaN	NaN	NaN	NaN	NaN	NaN	NaN	NaN	NaN	NaN	NaN	NaN	NaN	NaN	NaN	NaN	NaN	NaN	NaN	NaN
CPT1B;hCG_2044796	A8K5K1;A5PLL0;A0A024R4W7;Q92523;Q53FV7;A2RRE8	Carnitine O-palmitoyltransferase 1, muscle isoform	2.60709	2.01017	1.52516	NaN	NaN	2.2125	NaN	NaN	3.2285	3.4594	2.06903	NaN	2.07709	NaN	3.88391	2.97744	NaN	3.03798	NaN	2.72547	2.58788	2.25732	3.45509	3.45353	3.90563	2.29245	2.71667	2.71246	2.82977	3.94751	NaN	2.33119	2.31331	NaN	1.61495	2.29149	NaN	2.03818	2.85914	2.56657	1.6889	1.79651	2.07153	NaN	NaN	NaN
CYB5R3	A0A024R4X0;P00387;Q6ZVI6	NADH-cytochrome b5 reductase;NADH-cytochrome b5 reductase 3;NADH-cytochrome b5 reductase 3 membrane-bound form;NADH-cytochrome b5 reductase 3 soluble form	-0.882895	-0.617413	-0.950824	-1.35244	-1.00263	-0.81749	-1.70243	-0.92352	-0.895752	-0.702013	-0.779238	-0.501207	-0.786614	-0.834687	-1.13853	-1.35999	-0.266903	-0.918659	-1.00162	-0.974878	-1.34729	-0.953541	-1.02998	-0.597534	-0.346735	-0.787635	-0.37205	-0.26678	-0.351004	-0.542609	-0.281113	-1.09262	-0.738085	-0.530424	-1.23652	-0.494703	-0.181552	-0.294886	-0.800863	-0.624031	-0.92957	-0.552965	-0.483932	-0.331181	-0.769621	-0.543114
SSRP1	A0A024R4Z6;Q08945	FACT complex subunit SSRP1	-0.455334	0.188256	-0.641546	-0.197514	0.474417	-0.400647	0.779794	-0.371057	-0.539233	-1.42455	-0.0118481	0.167056	-0.496779	-0.0707468	-1.03756	-0.607992	0.322021	-0.55246	-0.934101	-1.00549	0.697359	-0.63012	-0.289091	-0.99099	-1.76124	-1.5172	-0.301512	-0.867978	-0.338987	-1.04076	-1.3502	-0.811006	0.533091	-1.18015	-0.380951	-1.30546	-0.53057	-1.8692	-1.40016	-1.42151	-2.14228	-1.2969	-1.53705	NaN	-0.97541	NaN
SBF1;DKFZp761D0422	A0A024R4Z9;G5E933;O95248;Q68CX1;Q59EX9	Myotubularin-related protein 5	NaN	NaN	NaN	NaN	NaN	NaN	NaN	NaN	NaN	NaN	NaN	NaN	NaN	NaN	NaN	NaN	NaN	NaN	NaN	NaN	NaN	NaN	NaN	NaN	NaN	NaN	NaN	NaN	NaN	NaN	NaN	NaN	NaN	NaN	NaN	NaN	NaN	NaN	NaN	NaN	NaN	NaN	NaN	NaN	NaN	NaN
DKFZp686G12235;ARSA	A0A0S2Z373;Q63HL5;A0A0C4DFZ2;A0A024R509;P15289	Arylsulfatase A;Arylsulfatase A component B;Arylsulfatase A component C	NaN	NaN	NaN	NaN	NaN	NaN	NaN	-1.07259	NaN	NaN	NaN	NaN	NaN	NaN	NaN	NaN	NaN	NaN	-0.431022	NaN	NaN	NaN	0.0420556	NaN	NaN	-0.912573	NaN	NaN	NaN	NaN	NaN	NaN	NaN	NaN	NaN	NaN	NaN	-0.837217	NaN	NaN	NaN	0.334334	NaN	NaN	NaN	NaN
FTH1	Q6NZ44;B3KXC3;A0A024R525;P02794;Q6NS36;G3V192;G3V1D1;E9PRK8;E9PKY7;Q8TD27	Ferritin;Ferritin heavy chain;Ferritin heavy chain, N-terminally processed	0.701553	0.823409	NaN	0.694994	0.89412	0.784084	1.0386	1.6366	0.615574	1.39821	1.19829	NaN	1.44077	1.0477	2.6322	2.03458	1.94636	1.21008	3.52106	1.98135	2.17013	NaN	-0.862193	1.33292	1.76526	2.44773	NaN	0.836921	1.40462	2.29702	1.47069	1.25965	1.55333	2.5107	-0.353662	2.35472	2.24986	2.54172	0.856589	2.02588	2.85805	2.88139	2.15089	NaN	2.15443	1.6342
DAK;DKFZp586B1621;TKFC	A0A140VJH7;A0A024R529;Q3LXA3;Q9UFX5;H0YCY6	Bifunctional ATP-dependent dihydroxyacetone kinase/FAD-AMP lyase (cyclizing);ATP-dependent dihydroxyacetone kinase;FAD-AMP lyase (cyclizing)	NaN	NaN	NaN	NaN	NaN	NaN	NaN	NaN	NaN	NaN	NaN	NaN	NaN	NaN	NaN	NaN	NaN	NaN	NaN	NaN	NaN	NaN	NaN	NaN	NaN	NaN	NaN	NaN	NaN	NaN	NaN	NaN	NaN	NaN	NaN	NaN	NaN	NaN	NaN	NaN	NaN	NaN	NaN	NaN	NaN	NaN
MTA2	A0A024R534;O94776	Metastasis-associated protein MTA2	-0.83374	1.95043	NaN	NaN	0.912401	NaN	-1.37022	-0.547351	NaN	NaN	NaN	NaN	0.97645	0.83087	NaN	-0.682034	0.359472	1.11935	NaN	NaN	NaN	NaN	NaN	0.554421	NaN	0.0397702	2.03925	NaN	NaN	NaN	NaN	-1.05818	-0.887993	NaN	-1.25514	NaN	NaN	-0.833173	0.0347217	NaN	NaN	NaN	NaN	NaN	NaN	NaN
UBXN1;LOC51035	E9PJ81;E9PRQ7;A0A024R598;A0A024R539;Q04323;B4E0P8;Q05BV2;B4DNC6;A0A087WTZ5	UBX domain-containing protein 1	0.0126878	0.155036	-1.33079	-0.182057	NaN	NaN	0.30386	-0.204391	-0.368042	-0.477096	0.880604	-0.167634	0.246276	0.023607	-0.343811	-0.478713	0.444675	-1.0997	0.750421	-0.0410929	NaN	0.140845	0.341109	0.266801	-0.494159	-0.660055	-0.240377	-0.592636	NaN	-0.856435	NaN	-0.396269	0.0818275	-0.981853	NaN	-0.668664	NaN	NaN	-0.264743	NaN	NaN	NaN	NaN	NaN	NaN	NaN
BAD	B4DZQ9;F5GYS3;A8MXU7;A0A024R562;Q92934	Bcl2-associated agonist of cell death	NaN	NaN	NaN	NaN	NaN	NaN	NaN	NaN	NaN	NaN	NaN	NaN	NaN	NaN	NaN	NaN	NaN	NaN	NaN	NaN	NaN	NaN	NaN	NaN	NaN	NaN	NaN	NaN	NaN	NaN	NaN	NaN	NaN	NaN	NaN	NaN	NaN	NaN	NaN	NaN	NaN	NaN	NaN	NaN	NaN	NaN
HSPC152;TRMT112	A0A024R565;Q9UI30;F5GX77;F5GYQ2	Multifunctional methyltransferase subunit TRM112-like protein	-0.348119	NaN	NaN	NaN	NaN	-2.01532	NaN	-1.00382	0.823116	NaN	0.00905957	0.982734	0.649056	0.428605	-0.747602	-0.644595	NaN	NaN	NaN	-0.671706	0.458862	NaN	0.454842	NaN	NaN	NaN	-0.105544	NaN	NaN	NaN	NaN	-0.476433	NaN	NaN	-0.520045	NaN	NaN	NaN	-0.770871	NaN	-0.071488	-0.276318	-0.904503	-0.959696	NaN	-0.394075
SF1	A0A024R588;A0A024R566;B4DJU4;A0A024R5D9;A0A024R572;Q15637;B4DX42	Splicing factor 1	NaN	-0.817132	NaN	-1.30016	-0.556307	NaN	-0.315218	-1.50039	NaN	NaN	-0.021255	-0.800753	-1.32083	-1.18167	-0.443515	NaN	-0.458697	NaN	0.212267	NaN	3.07704	NaN	-0.333767	-0.738898	NaN	-1.15639	-1.62663	NaN	NaN	NaN	NaN	-1.49708	NaN	NaN	NaN	NaN	NaN	NaN	-1.78907	0.247166	-1.83174	1.56875	0.603468	NaN	NaN	NaN
EHD1	B2R5U3;A0A024R571;Q9H4M9;B4DTR4;B4DMV9;B4DZH9;C9JC03;C9J2Z4;C9JDQ8	EH domain-containing protein 1	0.0309598	0.496615	-0.338724	-0.553152	-1.50091	-0.286284	-0.381726	-0.124952	-0.10702	-0.4563	-0.884744	0.810619	0.29906	-0.202096	0.146065	-0.944442	0.0649053	-0.323646	-0.302747	-0.120524	-0.374093	-0.533356	-0.386062	0.0949353	-0.796897	-0.924421	0.0512495	-0.987951	-0.302343	-0.817142	-0.763878	-0.231366	-0.241901	-0.734802	-0.395282	0.99592	-0.585819	-0.569155	-0.472919	-0.487698	-0.604658	-0.480844	-0.894444	-0.835783	-1.05465	-0.456242
TM7SF2	B4DK82;A0A024R577;O76062;H0YEN6;E9PS18;E9PRQ1;E9PS09;E9PLS9;E9PLI3	Delta(14)-sterol reductase	0.0165412	NaN	NaN	-0.103397	NaN	NaN	0.285179	0.105877	-0.0797024	NaN	NaN	0.414307	NaN	NaN	NaN	NaN	NaN	0.0257056	NaN	NaN	-0.259062	NaN	NaN	NaN	NaN	NaN	NaN	NaN	-0.638584	NaN	NaN	NaN	NaN	-0.385044	NaN	NaN	NaN	NaN	0.368421	NaN	0.551374	NaN	-0.414136	-0.908967	NaN	NaN
MRPL49	A0A024R578;Q13405;H0YDP7;Q59GE9	39S ribosomal protein L49, mitochondrial	0.362224	0.365593	NaN	0.560332	0.124285	0.439207	NaN	0.0235767	-0.142972	0.419623	-0.257179	-0.486766	0.0686671	1.50267	NaN	-0.528402	NaN	0.729707	0.261561	-0.82122	-0.96624	0.184933	-0.0617169	0.527054	-0.285848	-0.374274	-0.156416	-0.772936	0.496093	-0.400458	0.0279668	-0.716508	NaN	0.124361	0.479734	-1.22307	0.415595	-0.775678	0.881005	-0.682554	-0.925507	-0.109427	-0.540585	-0.509102	-0.332656	NaN
DPF2	A0A024R582;J3KMZ8;Q92785	Zinc finger protein ubi-d4	NaN	NaN	NaN	NaN	NaN	NaN	NaN	NaN	NaN	NaN	NaN	NaN	NaN	NaN	NaN	NaN	NaN	NaN	NaN	NaN	NaN	NaN	NaN	NaN	NaN	NaN	NaN	NaN	NaN	NaN	NaN	NaN	NaN	NaN	NaN	NaN	NaN	NaN	NaN	NaN	NaN	NaN	NaN	NaN	NaN	NaN
RTN3	A0A024R5C4;B7Z361	Reticulon	NaN	NaN	NaN	NaN	NaN	NaN	NaN	NaN	NaN	NaN	NaN	NaN	NaN	NaN	NaN	NaN	NaN	NaN	NaN	NaN	NaN	NaN	NaN	NaN	NaN	NaN	NaN	NaN	NaN	NaN	NaN	NaN	NaN	NaN	NaN	NaN	NaN	NaN	NaN	-1.07369	-2.73281	NaN	NaN	NaN	NaN	NaN
PC	A0A024R5C5;P11498;E9PS68;E9PRE7	Pyruvate carboxylase;Pyruvate carboxylase, mitochondrial	NaN	NaN	NaN	NaN	NaN	NaN	NaN	NaN	-0.482745	1.07464	NaN	NaN	NaN	-0.0600475	-0.362554	NaN	NaN	NaN	NaN	NaN	NaN	NaN	NaN	NaN	NaN	NaN	0.334826	NaN	-1.00346	-0.33308	NaN	-0.302173	NaN	NaN	NaN	NaN	NaN	NaN	NaN	NaN	NaN	NaN	NaN	NaN	NaN	NaN
TCIRG1	E9PMC5;E9PM12;Q64F87;E9PNA6;A0A024R5E5;Q13488	V-type proton ATPase subunit a;V-type proton ATPase 116 kDa subunit a isoform 3	NaN	NaN	NaN	NaN	NaN	NaN	NaN	NaN	NaN	NaN	NaN	NaN	NaN	NaN	NaN	NaN	NaN	NaN	NaN	NaN	NaN	NaN	NaN	NaN	NaN	NaN	NaN	NaN	NaN	NaN	NaN	NaN	NaN	NaN	NaN	NaN	NaN	NaN	NaN	NaN	NaN	NaN	NaN	NaN	NaN	NaN
SAPS3;PPP6R3	A0A024R5F3;H7BXH2;E9PKF6;Q5H9R7;E9PK08;B4DP39;Q7L294;B4DTT7;B4DYU6;H0YEN2;E9PQP7;B4E0C2	Serine/threonine-protein phosphatase 6 regulatory subunit 3	NaN	NaN	NaN	NaN	NaN	NaN	NaN	NaN	NaN	NaN	NaN	NaN	NaN	NaN	NaN	NaN	NaN	NaN	NaN	NaN	NaN	NaN	NaN	NaN	NaN	NaN	NaN	NaN	NaN	NaN	NaN	NaN	NaN	NaN	NaN	NaN	NaN	NaN	NaN	NaN	NaN	NaN	NaN	NaN	NaN	NaN
CPT1A	B2RAQ8;A0A024R5F4;P50416	Carnitine O-palmitoyltransferase 1, liver isoform	NaN	NaN	NaN	NaN	NaN	NaN	NaN	NaN	NaN	NaN	NaN	NaN	NaN	NaN	NaN	NaN	NaN	NaN	NaN	NaN	NaN	NaN	NaN	NaN	NaN	NaN	NaN	NaN	NaN	NaN	NaN	NaN	NaN	NaN	NaN	NaN	NaN	NaN	NaN	NaN	NaN	NaN	NaN	NaN	NaN	NaN
DHCR7	A8K0D2;A0A024R5F7;Q9UBM7;X5DNI9;E9PJ54;X5D9E1;E9PM00;A0A0S2Z3S3;B4E1K5;X5DRD7	7-dehydrocholesterol reductase	NaN	NaN	NaN	NaN	NaN	NaN	NaN	NaN	NaN	NaN	NaN	NaN	NaN	NaN	NaN	NaN	NaN	NaN	NaN	NaN	NaN	NaN	NaN	NaN	NaN	NaN	NaN	NaN	NaN	NaN	NaN	NaN	NaN	NaN	NaN	NaN	NaN	NaN	NaN	NaN	NaN	NaN	NaN	NaN	NaN	NaN
B3GNT6;B4GAT1	B4DEN5;B3KQQ7;A0A024R5F9;O43505;B4DGI0	Beta-1,4-glucuronyltransferase 1	NaN	NaN	NaN	NaN	NaN	NaN	NaN	NaN	NaN	NaN	NaN	NaN	NaN	NaN	NaN	NaN	NaN	NaN	NaN	NaN	NaN	NaN	NaN	NaN	NaN	NaN	NaN	NaN	NaN	NaN	NaN	NaN	NaN	NaN	NaN	NaN	NaN	NaN	NaN	NaN	NaN	NaN	NaN	NaN	NaN	NaN
BANF1	A0A024R5H0;O75531;B2R4V4	Barrier-to-autointegration factor;Barrier-to-autointegration factor, N-terminally processed	-2.16996	-1.39988	-2.40602	-2.31791	-2.93627	-1.74593	NaN	-3.06141	NaN	NaN	NaN	-2.96463	-2.60688	NaN	-2.29569	NaN	-1.75356	-1.76876	NaN	-2.34551	-1.73141	-1.72225	-2.35887	-2.67503	-1.84928	-2.31098	-2.52862	-2.35558	NaN	-1.81672	-2.21233	-1.99476	-1.90901	-2.24324	NaN	-1.68005	NaN	NaN	NaN	-1.79697	-1.29387	-1.73976	NaN	NaN	NaN	NaN
PACS1	A0A024R5H6;Q6VY07;B4DF77	Phosphofurin acidic cluster sorting protein 1	-0.746485	0.252045	NaN	0.0585397	0.0746609	-0.945608	NaN	NaN	-0.933241	-0.56179	0.284968	0.248233	-0.894188	-0.0454429	NaN	-0.314986	NaN	NaN	-0.646347	-0.674103	NaN	NaN	-1.39819	NaN	NaN	NaN	-0.415356	NaN	0.0710574	NaN	NaN	-1.59698	-0.90738	NaN	-0.980391	-0.16092	-0.67084	NaN	NaN	NaN	-1.04187	NaN	NaN	NaN	NaN	0.18774
RAB6A	Q6FGX3;A0A024R5H8;Q53ET8		0.22632	-0.487627	-0.572393	0.202499	-0.319442	-0.142979	0.479119	-0.0689119	-0.346257	-0.0597156	0.092292	0.414785	-0.167575	0.0494631	-0.370615	-0.768368	0.0764832	-0.971862	-0.109663	-0.0844109	-0.692607	0.615059	-0.0211056	-0.859565	-0.457786	-0.624831	-0.00912636	-0.37178	0.0558242	-0.530075	-0.553869	-0.133404	-0.540848	-0.995702	-0.28713	-0.939467	-0.423932	-1.00564	-0.300349	-0.637587	-1.00115	-0.496993	-0.923649	-0.610168	-0.90816	-0.544318
RAB6A	A0A024R5J5;P20340;B7Z5Z9	Ras-related protein Rab-6A	NaN	NaN	NaN	NaN	NaN	NaN	NaN	NaN	NaN	NaN	NaN	NaN	NaN	NaN	NaN	NaN	NaN	NaN	NaN	NaN	NaN	NaN	NaN	NaN	NaN	NaN	NaN	NaN	NaN	NaN	NaN	NaN	-0.638584	NaN	NaN	NaN	NaN	NaN	NaN	NaN	NaN	NaN	NaN	NaN	NaN	NaN
CHCHD8;COA4	A0A024R5J6;Q9NYJ1	Cytochrome c oxidase assembly factor 4 homolog, mitochondrial	NaN	NaN	NaN	NaN	NaN	NaN	NaN	-0.348119	NaN	NaN	NaN	NaN	NaN	NaN	NaN	NaN	NaN	NaN	NaN	NaN	NaN	NaN	NaN	NaN	NaN	NaN	NaN	NaN	NaN	NaN	NaN	NaN	NaN	NaN	NaN	NaN	NaN	NaN	NaN	NaN	NaN	NaN	NaN	NaN	NaN	NaN
NDUFC2;KCTD14;NDUFC2-KCTD14	A0A024R5K6;O95298;E9PRJ5;E9PM14;A0A087WUM3;E9PQ53	NADH dehydrogenase [ubiquinone] 1 subunit C2;NADH dehydrogenase [ubiquinone] 1 subunit C2, isoform 2	0.313884	-0.448594	1.44025	-0.728639	-0.975056	-0.935236	-1.26977	-1.31671	-1.47415	-1.12151	-0.153966	-2.47457	-1.59026	-1.37306	-0.704518	0.0579085	-1.87436	-1.01405	0.125551	-0.49681	0.0558521	-0.477622	-0.262148	-0.45588	0.196741	0.483719	0.581303	0.328183	-1.03404	-0.124074	-0.160199	-0.646065	-0.418424	-0.160307	0.689827	0.419543	-0.214034	0.0643031	0.266735	0.251015	0.197454	0.225368	0.680782	-0.095587	0.669055	-0.191942
SERPINH1	A0A024R5K8;P50454;B4DN87;A8K259;E9PR70;E9PK86;E9PMI5	Serpin H1	-0.996036	-0.85007	-2.04055	-1.03942	-0.651796	-1.19399	-0.822047	-1.10043	-1.24482	-1.02438	-1.61844	-0.969221	-1.30989	-1.45983	-1.27883	-1.58462	-0.983921	-1.22395	-0.495266	-1.1649	-3.3126	-1.05899	-1.44667	-1.25771	-1.53625	-1.52774	-0.916249	-1.75816	-1.63749	-1.13332	-1.31473	-1.01584	-1.24168	-1.232	-1.15021	-1.43637	-0.962919	-1.22781	-1.1873	-1.74657	-1.47131	-1.05165	-1.78126	-1.01435	-1.1518	-0.924895
PRCP	A0A024R5L0;P42785;B7Z7Q6;E9PQB5;E9PL85;E9PQN3;E9PKN6;E9PIG4	Lysosomal Pro-X carboxypeptidase	NaN	NaN	-0.739534	NaN	-0.300276	NaN	0.417414	0.469035	0.473951	0.305884	0.236181	-0.362666	0.259104	0.538409	-0.556993	-1.22059	1.19906	-0.562015	-0.18612	NaN	NaN	NaN	-0.508981	0.907684	-0.504023	-0.615416	-0.481781	-0.267465	-0.393416	NaN	-1.0084	-1.07382	-0.685985	-3.12178	-2.14009	-0.56617	NaN	NaN	-0.963326	-1.18059	-0.498336	NaN	NaN	-0.195222	-1.24841	0.302974
PICALM	B5BU72;A0A024R5L7;A8K5U9;A0A024R5P1;Q13492;E9PI56;E9PKP6;E9PLJ8	Phosphatidylinositol-binding clathrin assembly protein	1.71814	NaN	0.91031	2.29917	-0.652326	-0.952632	3.04513	0.336766	0.0112244	-1.41045	-0.188107	3.85271	NaN	0.744632	-0.706022	NaN	1.96835	NaN	-0.0239201	1.60625	NaN	NaN	NaN	NaN	NaN	-1.80797	NaN	NaN	NaN	NaN	NaN	NaN	NaN	NaN	-0.101784	-0.799999	NaN	NaN	0.761629	-2.38822	-1.34744	NaN	-1.66713	NaN	0.109997	0.32018
STARD10	F5H8G1;F5H1Z6;F5H8H3;B3KTJ1;A0A024R5L8;Q9Y365;F5GWK5;F5H5A8;H0YGN8;F5H3G8;F5H0V7;H0YH17;H0YGA9;A0A024R5G8;H0YFF3;F5GY11	PCTP-like protein	NaN	NaN	NaN	NaN	NaN	NaN	NaN	NaN	NaN	NaN	NaN	NaN	NaN	NaN	NaN	NaN	NaN	NaN	NaN	NaN	NaN	NaN	NaN	NaN	NaN	NaN	NaN	NaN	NaN	NaN	NaN	NaN	NaN	NaN	NaN	NaN	NaN	NaN	NaN	NaN	NaN	NaN	NaN	NaN	NaN	NaN
CTTN;EMS1	A0A024R5M3;Q14247;Q53HG7;Q76MU0	Src substrate cortactin	0.188079	0.208836	-0.35835	-0.55871	0.382098	0.498009	0.821738	1.60481	1.84363	-0.472488	0.483081	0.264702	-0.657899	0.341534	-0.341812	-0.134674	0.130313	-0.828377	-1.0893	1.3237	-0.33754	-0.194693	-0.0132708	0.397664	-0.954046	-0.251446	-0.815066	-0.148088	0.251745	-0.919149	-0.0506444	-0.410199	-0.811995	-0.281786	-0.385099	-0.588133	-0.0533319	-1.44666	-1.01646	-0.564244	-0.561291	-0.050749	-0.759544	-0.424082	-0.00374608	-0.447844
NUMA1;NUMA1 variant protein	A0A024R5M9;Q4LE64;Q14980;A0A087WY61;A0A024R5G4;Q59HB8;Q7Z757	Nuclear mitotic apparatus protein 1	-0.114338	0.237698	-0.571946	0.358586	0.713439	-0.195667	0.552257	0.154708	0.0152387	0.0854954	0.272927	0.400883	0.897411	0.581721	0.000625812	-0.450715	0.415817	-0.164447	-0.207128	-0.67671	0.0783648	1.0284	-0.757937	-0.320379	-0.968961	-0.782679	0.150701	-0.565164	-0.288484	-0.704952	-0.750883	0.00394011	-0.0109768	-0.77748	-0.192781	-0.671076	-0.176915	-0.95757	-0.149591	-0.574811	-0.773435	-0.562617	-0.986329	-0.575116	-0.466202	-0.224775
NEU3	B4E0V4;A0A024R5N6;Q9UQ49	Sialidase-3	NaN	NaN	NaN	NaN	NaN	NaN	NaN	NaN	NaN	NaN	NaN	NaN	NaN	NaN	NaN	NaN	NaN	NaN	NaN	NaN	NaN	NaN	NaN	NaN	NaN	NaN	NaN	NaN	NaN	NaN	NaN	NaN	NaN	NaN	NaN	NaN	NaN	NaN	NaN	NaN	NaN	NaN	NaN	NaN	NaN	NaN
C1orf121;DESI2	A0A024R5P6;Q9BSY9	Desumoylating isopeptidase 2	NaN	NaN	NaN	NaN	NaN	NaN	NaN	NaN	NaN	NaN	NaN	NaN	NaN	NaN	NaN	NaN	NaN	NaN	NaN	NaN	NaN	NaN	NaN	NaN	NaN	NaN	NaN	NaN	NaN	NaN	NaN	NaN	NaN	NaN	NaN	NaN	NaN	NaN	NaN	NaN	NaN	NaN	NaN	NaN	NaN	NaN
hCG_2003792;HYPK	A0A024R5Q1;Q9NX55	Huntingtin-interacting protein K	NaN	NaN	NaN	NaN	NaN	NaN	NaN	NaN	NaN	NaN	NaN	NaN	NaN	NaN	NaN	NaN	NaN	NaN	NaN	NaN	NaN	NaN	NaN	NaN	NaN	NaN	NaN	NaN	NaN	NaN	NaN	NaN	NaN	NaN	NaN	NaN	NaN	NaN	NaN	NaN	NaN	NaN	NaN	NaN	NaN	NaN
GATM	A0A140VK19;A0A024R5Q4;P50440;H0YMX4	Glycine amidinotransferase, mitochondrial	NaN	-0.136716	NaN	NaN	-0.47633	NaN	NaN	NaN	NaN	NaN	NaN	NaN	NaN	NaN	NaN	NaN	NaN	NaN	NaN	NaN	NaN	NaN	NaN	NaN	NaN	NaN	NaN	NaN	NaN	NaN	NaN	NaN	NaN	NaN	NaN	NaN	NaN	NaN	NaN	NaN	NaN	NaN	NaN	NaN	NaN	NaN
ADSS	A0A024R5Q7;P30520;B4E1L0	Adenylosuccinate synthetase isozyme 2	NaN	NaN	NaN	NaN	NaN	NaN	NaN	NaN	NaN	NaN	NaN	NaN	NaN	NaN	NaN	NaN	NaN	NaN	NaN	NaN	NaN	NaN	NaN	NaN	NaN	NaN	NaN	NaN	NaN	NaN	NaN	NaN	NaN	NaN	NaN	NaN	NaN	NaN	NaN	NaN	NaN	NaN	NaN	NaN	NaN	NaN
EIF3S1;EIF3J	A0A024R5S5;O75822	Eukaryotic translation initiation factor 3 subunit J	1.20407	1.0216	0.9716	1.28817	0.411126	1.2396	1.29534	0.932743	1.6872	1.78498	0.699035	0.974234	1.33472	1.60687	0.271567	NaN	NaN	0.783862	-0.731183	0.863501	1.2654	1.78524	0.711252	0.511979	-0.66998	NaN	0.427013	NaN	0.0150534	NaN	NaN	NaN	NaN	-0.348686	0.933876	-0.597793	0.0521768	NaN	NaN	-0.672018	0.898216	NaN	NaN	NaN	NaN	0.696724
ADAM10	A0A024R5U5;O14672;A0AV88	Disintegrin and metalloproteinase domain-containing protein 10	-0.194591	1.18547	NaN	-1.26255	NaN	NaN	NaN	NaN	0.273082	NaN	0.096499	1.52604	1.48154	NaN	NaN	0.0455802	NaN	NaN	0.693434	NaN	NaN	NaN	NaN	NaN	NaN	NaN	NaN	NaN	NaN	1.02682	NaN	NaN	NaN	NaN	NaN	NaN	NaN	NaN	NaN	NaN	0.650839	NaN	-0.537346	0.139474	NaN	NaN
hCG_40688;MYZAP;GCOM1	A0A024R5W4;P0CAP1;H8Y6P7	Myocardial zonula adherens protein	0.858279	-0.858777	1.02453	0.247499	1.42456	1.75825	2.36245	-0.862987	0.355984	0.434763	0.693085	1.10759	-0.50179	-1.15575	-0.56267	-0.267116	0.563081	-0.473366	0.602426	1.87358	NaN	0.292635	0.496427	-0.0165141	0.288731	-1.14669	0.638771	-0.188907	0.219981	-0.215052	-0.251726	1.02069	0.0977658	-0.187388	0.0457021	-0.451224	-0.0454369	-0.78663	0.0378262	NaN	0.441771	NaN	-0.866631	NaN	-0.0799754	-0.00489682
TPM1	A0A024R5W6		0.199159	-1.16418	0.3502	-0.388147	-1.39325	-0.143916	NaN	NaN	-0.249525	-0.534724	NaN	0.485741	-2.22413	-0.941933	0.112053	-0.699452	-0.561106	-0.43098	-0.522056	0.703971	NaN	-0.720454	-0.0423334	0.482029	0.0574216	0.0952655	-0.544862	0.899169	0.461146	-0.0938075	0.461072	-1.1452	-0.471516	0.421284	-0.729777	NaN	NaN	NaN	-0.250403	NaN	NaN	NaN	0.739107	-0.850799	0.131707	-0.486276
hCG_2001986;SQRDL	Q9UHS8;Q53HW7;B2R7T6;A0A024R5X2;Q9Y6N5;H3BNX3	Sulfide:quinone oxidoreductase, mitochondrial	NaN	NaN	NaN	NaN	NaN	NaN	NaN	NaN	NaN	NaN	NaN	1.31197	NaN	NaN	NaN	NaN	NaN	NaN	NaN	NaN	NaN	NaN	NaN	NaN	NaN	NaN	NaN	NaN	NaN	NaN	NaN	NaN	NaN	NaN	NaN	NaN	NaN	NaN	NaN	NaN	NaN	NaN	NaN	NaN	NaN	NaN
CLPX;DKFZp586J151	A0A024R5X7;O76031;Q9H072	ATP-dependent Clp protease ATP-binding subunit clpX-like, mitochondrial	NaN	NaN	0.417752	0.232566	0.114925	0.146164	1.0355	NaN	NaN	0.0853284	NaN	0.441125	-0.00446547	0.589529	-0.781486	-0.804384	NaN	-0.290417	-0.121281	0.678857	NaN	NaN	0.147177	NaN	NaN	NaN	1.55075	NaN	NaN	NaN	NaN	0.738481	1.42946	NaN	0.0530296	NaN	NaN	-1.44763	1.0511	NaN	-0.768841	NaN	NaN	NaN	NaN	-0.95002
DPP8	J3KPT0;B4DYW8;A8K4U2;A0A024R5Z6;Q6V1X1;B4DLA8;H0YN53;H3BQ40;H0YKA2	Dipeptidyl peptidase 8	NaN	NaN	NaN	NaN	NaN	NaN	NaN	NaN	NaN	NaN	NaN	NaN	1.72604	NaN	NaN	NaN	NaN	2.32092	NaN	NaN	NaN	NaN	4.79722	NaN	NaN	NaN	NaN	NaN	NaN	2.23691	NaN	NaN	NaN	NaN	NaN	NaN	NaN	NaN	NaN	NaN	NaN	NaN	NaN	NaN	NaN	NaN
HEL-S-270;ANXA2;ANXA2P2	V9HW65;A0A024R5Z7;P07355;H0YN42;H0YMD0;H0YMU9;A6NMY6;H0YM50;H0YKS4;B3KRQ1;H0YN28;H0YL33;H0YNP5;B4DNH8	Annexin;Annexin A2;Putative annexin A2-like protein	0.914523	0.237876	0.195101	-0.382724	0.188083	-1.15077	-0.283194	-0.698001	-0.917692	-1.4036	-0.404541	0.1252	-0.542874	-0.476574	-0.972355	-0.64949	0.334346	-0.604617	0.596974	-0.26096	-0.374464	0.397325	-0.64456	-0.286458	-0.319078	0.322859	0.680984	-0.205529	0.744183	0.0655817	-0.452001	0.931633	-0.143182	0.0822591	1.04245	-0.483377	0.630906	-0.0611121	0.776779	-0.87869	0.202887	1.1893	-0.532969	0.50351	0.359256	1.07093
PKM2;PKM	A0A024R5Z9;H3BTN5;B4DRT3;Q504U3;H3BR70;A0A024R609;H3BQ34	Pyruvate kinase	-0.837846	-0.657774	-0.720188	-0.649213	-0.620094	-0.811096	-0.522905	-0.902858	-0.860764	-1.02115	-0.770742	-0.235473	-0.751164	-0.48593	-0.90672	-0.89846	-0.446035	-0.551242	-0.5468	-0.598961	-1.02829	-0.622553	-0.767381	-0.638629	-0.900544	-0.895474	-0.664824	-0.932412	-0.350435	-0.523955	-0.974087	-0.525465	-0.287558	-0.641804	-0.386628	-1.02713	-0.496015	-0.858091	-0.475814	-0.700126	-0.686923	-0.547415	-0.996033	-0.41133	-0.486292	-0.110624
CORO1A	A0A024R611;Q59G88;P31146	Coronin;Coronin-1A	NaN	NaN	NaN	NaN	NaN	NaN	NaN	NaN	NaN	NaN	NaN	NaN	NaN	NaN	NaN	NaN	NaN	NaN	NaN	NaN	NaN	NaN	NaN	NaN	NaN	NaN	NaN	NaN	NaN	NaN	NaN	NaN	NaN	NaN	NaN	NaN	NaN	NaN	NaN	NaN	NaN	NaN	NaN	NaN	NaN	NaN
PPP4C	H3BTA2;A0A024R625;P60510;Q5U086;H3BV22	Serine/threonine-protein phosphatase;Serine/threonine-protein phosphatase 4 catalytic subunit	NaN	NaN	NaN	-0.509544	NaN	NaN	-0.531169	NaN	NaN	NaN	NaN	NaN	NaN	NaN	-0.370945	NaN	NaN	NaN	NaN	NaN	NaN	NaN	NaN	NaN	NaN	NaN	NaN	NaN	NaN	NaN	NaN	NaN	NaN	NaN	-1.18466	NaN	NaN	NaN	NaN	NaN	-1.44827	NaN	NaN	NaN	NaN	NaN
TBC1D4	A0A024R637;O60343	TBC1 domain family member 4	-0.578588	-0.136127	-1.06074	-0.201162	-0.049352	-1.56104	-0.711169	0.165919	-0.722822	-0.315524	0.32948	-0.599286	-0.747494	-0.832721	-0.606651	-1.66539	-0.436721	-1.10306	-0.647989	-0.53591	-2.2603	-0.0945175	-0.210589	-0.53896	-0.868297	-1.40015	-0.285933	0.575978	NaN	-1.58559	NaN	-1.49282	-0.669753	-0.582833	-0.778965	-0.871091	-0.555031	-0.321813	-1.07783	-1.29405	-0.564663	0.158832	-1.18498	-0.177556	0.0646005	-1.11083
AGPAT5	Q6NUM7;A0A024R640;Q9NUQ2	1-acyl-sn-glycerol-3-phosphate acyltransferase epsilon	NaN	NaN	NaN	NaN	NaN	NaN	NaN	NaN	NaN	NaN	NaN	NaN	NaN	NaN	NaN	NaN	NaN	NaN	NaN	NaN	NaN	NaN	NaN	NaN	NaN	NaN	NaN	NaN	NaN	NaN	NaN	NaN	NaN	NaN	NaN	NaN	NaN	NaN	NaN	NaN	NaN	NaN	NaN	NaN	NaN	NaN
TIMM9	A0A024R648;Q9Y5J7;G3V502;G3V2F3	Mitochondrial import inner membrane translocase subunit Tim9	NaN	-0.160443	NaN	NaN	NaN	-0.291368	NaN	-0.650305	NaN	0.109577	0.280382	NaN	0.761898	-0.21176	NaN	NaN	NaN	0.0966839	-0.435202	NaN	-0.697685	NaN	0.346408	NaN	NaN	0.583452	-0.202136	0.708915	NaN	NaN	NaN	NaN	NaN	NaN	NaN	2.50701	NaN	NaN	NaN	NaN	0.067712	NaN	NaN	NaN	NaN	NaN
MTHFD1	A0A024R652;P11586;F5H2F4;B7Z809	C-1-tetrahydrofolate synthase, cytoplasmic;Methylenetetrahydrofolate dehydrogenase;Methenyltetrahydrofolate cyclohydrolase;Formyltetrahydrofolate synthetase;C-1-tetrahydrofolate synthase, cytoplasmic, N-terminally processed	0.0241971	0.56112	0.0234605	0.679298	0.75127	0.601975	0.575361	0.302107	-0.0340557	-0.195056	0.738741	0.676742	0.225051	0.455518	0.230157	0.067766	0.342983	0.657944	0.310749	0.10255	0.796473	0.779538	0.363767	0.861719	-0.324867	-0.00661524	0.603307	-0.170758	0.45615	0.114402	-0.0707895	0.127449	0.660021	0.0601994	0.00739311	-0.449911	0.608381	0.172228	0.1505	-0.182962	-0.452295	-0.22536	-0.282779	-0.0405171	-0.211676	-0.235314
KTN1	A0A024R663;Q86UP2	Kinectin	-0.806991	-0.352183	-1.00514	-1.12273	-0.304023	-0.285283	-0.415573	-0.662525	-1.26859	-0.724561	-0.34263	-0.223272	-0.212586	0.245997	-0.00616591	-0.61248	0.363107	-0.291265	-1.90078	-0.275957	-0.633954	0.0654171	-0.785156	-0.379709	-0.682518	-0.651462	-0.0533209	-0.755622	-0.420991	-2.64325	-0.715085	-0.292529	0.0351741	-1.24051	-0.326135	-1.16701	-0.47985	-0.85786	-0.598112	-1.25086	-0.953123	-1.03927	-1.36457	-0.426619	-1.32203	-0.41067
MNAT1	A0A024R669;A0A024R688;P51948;H0YJ92;H0YJF2	CDK-activating kinase assembly factor MAT1	NaN	NaN	NaN	NaN	NaN	NaN	NaN	NaN	NaN	NaN	NaN	NaN	NaN	NaN	NaN	NaN	NaN	NaN	NaN	NaN	NaN	NaN	NaN	NaN	NaN	NaN	NaN	NaN	NaN	NaN	NaN	NaN	NaN	NaN	NaN	NaN	NaN	NaN	NaN	NaN	NaN	NaN	NaN	NaN	NaN	NaN
SYNJ2BP;SYNJ2BP-COX16	A0A024R670;A0A087WUM0;P57105	Synaptojanin-2-binding protein	NaN	0.360355	-1.04235	0.00438835	0.404818	0.420469	1.61171	-1.43996	-0.0642135	0.0804387	0.348104	0.480928	0.649057	0.671183	0.370193	0.377276	0.391039	0.0194963	-0.0130328	0.0484762	1.13207	0.801339	-0.446416	-0.144974	-1.20541	-0.862629	0.131376	-0.504603	-0.264026	-1.16408	-1.15458	-0.612148	0.140116	-0.700972	0.865185	-0.585618	-0.178133	-0.621545	-0.0857643	-0.762954	-0.455912	0.719804	0.294223	NaN	1.1614	0.148476
SPTB	A0A024R674		-0.502161	0.112975	-0.238863	0.169192	-0.135246	-0.459235	0.151468	-0.216001	0.132965	0.0756464	0.132774	-0.046198	-0.133781	-0.0938216	0.131733	-0.631233	0.0609456	-0.480839	-0.00803536	-0.240641	0.235132	-0.105399	-0.22315	-0.188751	-1.86029	-0.524532	-0.147455	-0.408108	-1.36453	-0.135213	-0.411977	-0.233328	-0.392386	-0.0619885	-0.873147	-0.661329	-0.370329	-0.559294	-1.57104	-0.939262	-0.499767	-0.515641	-0.913758	-0.598572	-0.641995	-1.81752
ATP6V1D;VATD	G3V2S6;Q9H3H0;A0A024R683;Q9Y5K8;H0YJ55;H0YJS0;Q9NW63;G3V559;Q8N5Z9	V-type proton ATPase subunit D	NaN	NaN	NaN	NaN	NaN	NaN	2.04692	NaN	NaN	0.685965	NaN	NaN	NaN	NaN	NaN	NaN	NaN	NaN	NaN	NaN	NaN	NaN	NaN	NaN	NaN	NaN	1.3833	NaN	NaN	NaN	NaN	0.776973	NaN	NaN	NaN	NaN	NaN	NaN	0.463728	NaN	NaN	NaN	NaN	NaN	NaN	NaN
hCG_22119;LGALS3	Q86TY5;A0A024R693;Q59FR8;P17931;Q6FGL0;G3V3R6	Galectin;Galectin-3	-1.67709	-0.954825	-1.55019	-1.27502	-0.909852	-1.55025	-1.59058	-1.30514	-1.72926	-1.35643	-1.11592	-1.17522	-0.668816	-1.00953	-1.47057	-1.97263	-0.757242	-1.11112	-1.27392	-1.40578	-0.859806	-0.109704	-0.950419	-1.40455	-1.45554	-1.37562	-0.721849	-2.16718	-0.81005	-0.903735	-1.01968	-0.814734	-0.502611	-1.21711	-0.771196	-1.42421	-0.822516	-1.54201	-0.55432	-1.37218	-1.84421	-0.670951	-1.55902	-1.34283	-1.48997	-1.32598
ACTN1	A0A024R694;P12814;Q86TX4	Alpha-actinin-1	-0.644767	-1.36957	-0.804096	-1.41677	-1.38551	-1.77859	-1.07736	-0.966006	-1.75353	-1.53055	-1.46188	-1.48507	-1.09145	-1.81026	-1.93559	-1.50354	-1.48744	-2.17234	-0.629534	-1.73892	-3.64161	-0.822392	-1.31373	-1.15548	-1.83998	-1.06057	-1.31533	-1.81943	-0.643472	-1.56612	-0.667369	-0.715603	-1.02285	-1.04662	-0.713563	-1.26369	-0.847976	-1.54725	-1.12175	-1.3205	-1.66302	-0.385962	-0.688235	-0.870711	-0.670766	0.0629599
ARG2	A0A024R6A0;P78540	Arginase;Arginase-2, mitochondrial	0.361629	-0.891741	-0.941482	0.150062	-0.326846	0.135825	0.233057	-0.650889	NaN	-0.229526	-0.113647	NaN	0.377763	0.0633941	-0.482848	1.06471	-0.161178	-0.705362	1.19744	-0.639478	NaN	1.53237	-0.568978	0.403633	-0.285306	0.683948	1.47136	1.11757	-0.0392049	0.802084	0.774117	-1.29901	0.536741	0.481134	0.542773	1.25394	NaN	1.28149	1.73834	0.48415	-0.0777636	-0.585924	-1.51205	0.449434	NaN	1.76749
PSEN1	B7Z8T5;E7ES96;Q53FV8;A0A0S2Z4D2;A0A024R6A3;P49768	Presenilin;Presenilin-1;Presenilin-1 NTF subunit;Presenilin-1 CTF subunit;Presenilin-1 CTF12	NaN	NaN	NaN	NaN	NaN	NaN	NaN	NaN	NaN	NaN	NaN	NaN	NaN	NaN	NaN	NaN	NaN	NaN	NaN	NaN	NaN	NaN	NaN	NaN	NaN	NaN	NaN	NaN	NaN	NaN	NaN	NaN	NaN	NaN	NaN	NaN	NaN	NaN	NaN	NaN	NaN	NaN	NaN	NaN	NaN	NaN
PPM1A	B5BUD5;B2R8E4;A0A024R6A5;P35813	Protein phosphatase 1A	-1.66102	NaN	NaN	NaN	NaN	NaN	-3.43976	NaN	-0.0790197	NaN	NaN	-0.477885	-0.0706641	-0.631616	-0.241851	NaN	NaN	0.725971	-0.910772	-0.487486	NaN	NaN	-1.30217	-0.0654344	-0.081067	-0.0206266	-0.523657	NaN	NaN	NaN	NaN	-0.195852	-0.0712008	-0.227741	-1.46111	-0.0567222	NaN	NaN	-0.857503	-0.136848	NaN	NaN	NaN	NaN	NaN	-0.411667
HSPA2	A0A024R6B5;P54652;B3KUS2	Heat shock-related 70 kDa protein 2	NaN	3.80543	NaN	NaN	NaN	NaN	NaN	NaN	NaN	NaN	NaN	NaN	NaN	NaN	NaN	3.55471	NaN	NaN	NaN	NaN	NaN	NaN	NaN	NaN	NaN	NaN	NaN	NaN	NaN	NaN	NaN	NaN	NaN	NaN	4.07624	NaN	NaN	NaN	NaN	NaN	NaN	NaN	NaN	NaN	NaN	NaN
NPC2	G3V2V8;J3KMY5;Q53HV6;A0A024R6C0;H0YIZ1;G3V3E8;E7EMS2;B4DV10;G3V3D1;P61916;B2R4S5	Epididymal secretory protein E1	NaN	NaN	NaN	NaN	NaN	NaN	NaN	NaN	NaN	NaN	NaN	NaN	NaN	NaN	NaN	NaN	NaN	NaN	NaN	NaN	NaN	NaN	3.07948	NaN	NaN	NaN	NaN	NaN	NaN	NaN	NaN	NaN	3.2188	NaN	NaN	NaN	NaN	NaN	NaN	NaN	NaN	NaN	NaN	NaN	NaN	NaN
DLST	A0A024R6C9;P36957;Q6IBS5;Q86TQ8;Q86TW7	Dihydrolipoyllysine-residue succinyltransferase component of 2-oxoglutarate dehydrogenase complex, mitochondrial	0.57058	0.291302	1.20827	0.704042	-0.0240826	1.20511	0.312796	0.49272	0.522857	0.585626	1.32325	-0.0572947	0.483623	0.386707	0.599513	1.09684	0.500552	0.752923	1.06165	1.33424	1.40653	0.560169	0.914505	1.02754	1.41727	1.4962	0.134239	1.16138	0.858894	1.17552	1.03126	0.536592	0.365786	0.943424	0.875376	1.14245	0.977252	1.48681	0.784989	1.4412	2.44554	0.974725	1.71814	1.3756	1.8636	0.679182
NEK9	A0A024R6D1;Q8TD19	Serine/threonine-protein kinase Nek9	NaN	-0.0247452	NaN	-1.06516	-0.0540844	NaN	NaN	0.26531	0.346225	NaN	NaN	0.755045	NaN	-1.00565	-1.23284	NaN	0.760362	NaN	NaN	NaN	NaN	1.59074	NaN	-0.939001	NaN	NaN	NaN	NaN	NaN	-0.452174	-0.989793	-0.0092038	NaN	NaN	NaN	-0.0597706	1.41481	NaN	-0.578807	NaN	NaN	NaN	NaN	NaN	NaN	NaN
ERH	A0A024R6D4;P84090;G3V279	Enhancer of rudimentary homolog	0.935503	-0.0467441	-0.0618904	-0.819717	0.88308	0.211996	1.37749	0.259424	-1.12918	-1.1488	-0.339929	-0.50731	-1.05557	-0.0505833	-0.344562	-1.1987	0.110045	-0.963842	-0.103982	-0.467655	-0.793142	0.150567	-0.28889	-1.59711	-2.19604	-0.787056	-0.641546	-0.885022	-2.43348	-0.521723	-0.525049	-0.344841	-1.72168	-0.58544	-0.667981	-2.38936	-1.65201	-2.65619	-1.03625	-1.1554	-0.460607	-0.610398	-0.748146	0.506448	-1.32124	-0.0475029
SFRS5;SRSF5	A0A024R6D8;Q59EK7;Q13243;B4DJK0;B4DUA4	Serine/arginine-rich splicing factor 5	1.70981	2.48778	NaN	-1.49723	0.736869	NaN	NaN	-0.245252	NaN	-1.42186	NaN	0.0411351	-1.10568	NaN	-2.0391	-0.356257	NaN	NaN	0.955704	NaN	0.648304	NaN	-0.652601	NaN	-1.84097	-0.399116	NaN	NaN	NaN	-0.0908535	NaN	NaN	-0.377624	NaN	NaN	0.85896	0.236096	-0.0229005	-0.228513	NaN	-0.606088	1.51858	NaN	2.21947	NaN	0.262486
FBLN5	B3KQA8;A0A024R6G3;G3V4U0;G3XA98;Q86TV4;Q9UBX5	Fibulin-5	NaN	NaN	NaN	NaN	NaN	NaN	NaN	NaN	NaN	NaN	NaN	NaN	NaN	NaN	NaN	NaN	NaN	NaN	NaN	NaN	NaN	NaN	NaN	NaN	NaN	NaN	NaN	NaN	NaN	NaN	NaN	NaN	NaN	NaN	NaN	NaN	NaN	NaN	NaN	NaN	NaN	NaN	NaN	NaN	NaN	NaN
ALDH6A1	A0A024R6G4;Q02252;Q53H94;Q53FN8;G3V4Z4	Methylmalonate-semialdehyde dehydrogenase [acylating], mitochondrial	-0.380001	-0.630608	-0.174758	-0.289706	-0.0597118	-0.423086	0.100068	-0.385126	-0.54198	-0.280569	0.0400192	-0.010314	-0.439397	-0.230594	-0.479731	-0.239292	0.0900594	-0.222028	-0.205066	-0.430635	-0.190508	-0.376759	-0.248119	-0.535299	-0.142425	0.0853641	0.0405211	-0.532685	-0.101224	0.314474	-0.528248	0.228159	-0.26879	-0.350156	-0.250176	0.0609184	-0.0639743	0.0093081	0.0101369	-0.255912	0.00709227	-0.128454	-0.272671	-0.233203	-0.407821	-0.440594
NDUFB1	A0A024R6G6;O75438	NADH dehydrogenase [ubiquinone] 1 beta subcomplex subunit 1	NaN	NaN	NaN	NaN	NaN	NaN	NaN	NaN	NaN	NaN	NaN	NaN	NaN	NaN	NaN	NaN	NaN	0.999885	NaN	NaN	NaN	NaN	NaN	NaN	NaN	NaN	NaN	NaN	NaN	NaN	NaN	NaN	NaN	NaN	NaN	0.390226	NaN	NaN	NaN	-0.508733	-2.06554	NaN	NaN	NaN	NaN	NaN
CPSF2	B3KN45;A0A024R6H0;Q9P2I0	Cleavage and polyadenylation specificity factor subunit 2	NaN	NaN	NaN	NaN	NaN	NaN	NaN	NaN	NaN	NaN	NaN	NaN	NaN	NaN	NaN	NaN	3.78498	NaN	NaN	NaN	NaN	NaN	NaN	NaN	NaN	NaN	NaN	NaN	NaN	-0.748891	NaN	NaN	NaN	NaN	NaN	NaN	NaN	NaN	NaN	NaN	NaN	NaN	NaN	NaN	NaN	NaN
TMED10	A0A024R6I3;Q53GF9;P49755;B4DZH3	Transmembrane emp24 domain-containing protein 10	-0.557826	-0.185963	-0.302649	-0.403792	-0.524915	-0.648577	0.138329	-0.596287	-0.399672	-0.293667	-0.212224	0.245344	-0.447835	-0.12268	-0.490743	-0.583649	0.117358	-0.534732	-0.318003	-0.321994	0.0518653	0.220139	-0.38279	-0.376643	-0.813471	-1.66573	-0.107954	-0.812022	-0.130522	-0.682215	-0.496435	-0.255253	-0.224241	-0.688728	0.0865873	-0.827852	0.162463	-0.329671	0.112688	-0.690425	-0.522104	-0.0789499	-0.813758	0.286996	-0.469308	0.0451075
CCNK	G3V235;G3V2Q3;G3V5E1;A0A024R6K1;O75909	Cyclin-K	NaN	NaN	NaN	NaN	NaN	NaN	NaN	NaN	NaN	NaN	NaN	NaN	NaN	NaN	NaN	NaN	NaN	NaN	NaN	NaN	NaN	NaN	NaN	NaN	NaN	NaN	NaN	NaN	NaN	NaN	NaN	NaN	NaN	NaN	NaN	NaN	NaN	NaN	NaN	NaN	NaN	NaN	NaN	NaN	NaN	NaN
SETD3	A0A024R6K3;Q86TU7	Histone-lysine N-methyltransferase setd3	NaN	NaN	NaN	NaN	NaN	NaN	NaN	NaN	NaN	NaN	NaN	NaN	NaN	NaN	NaN	NaN	NaN	NaN	NaN	NaN	NaN	NaN	NaN	NaN	NaN	NaN	NaN	NaN	NaN	NaN	NaN	NaN	NaN	NaN	NaN	NaN	NaN	NaN	NaN	NaN	NaN	NaN	NaN	NaN	NaN	NaN
EVL	B4DW58;A0A024R6K5;Q9UI08;G3V5F7;G3V314	Ena/VASP-like protein	0.945165	NaN	NaN	NaN	NaN	NaN	NaN	NaN	NaN	NaN	NaN	NaN	NaN	NaN	0.582426	NaN	NaN	NaN	NaN	NaN	NaN	NaN	NaN	NaN	NaN	NaN	NaN	NaN	NaN	NaN	NaN	NaN	NaN	NaN	NaN	NaN	NaN	NaN	1.23402	NaN	NaN	NaN	NaN	NaN	NaN	NaN
WARS	A0A024R6K8;P23381	Tryptophan--tRNA ligase, cytoplasmic;T1-TrpRS;T2-TrpRS	-1.49994	0.306145	NaN	0.297905	0.602406	-0.123666	1.76665	-0.257673	0.798366	-0.0760118	0.0567915	NaN	0.495019	NaN	0.0130722	0.0393548	NaN	NaN	-0.333879	2.29187	-0.134747	NaN	1.26595	0.20042	0.641842	-0.496297	1.52642	-0.384047	NaN	NaN	-0.344374	0.0791579	-0.0258793	0.0594498	-0.212383	-0.258747	NaN	NaN	NaN	-0.935509	-1.34449	NaN	NaN	NaN	NaN	NaN
SMEK1;KIAA2010	G3V5Z3;A0A024R6M2;Q6IN85;H0YIY8	Serine/threonine-protein phosphatase 4 regulatory subunit 3A	NaN	NaN	NaN	NaN	NaN	NaN	NaN	NaN	NaN	NaN	NaN	NaN	NaN	NaN	NaN	NaN	NaN	NaN	NaN	NaN	NaN	NaN	NaN	NaN	NaN	NaN	NaN	NaN	NaN	NaN	NaN	NaN	NaN	NaN	NaN	NaN	NaN	NaN	NaN	NaN	NaN	NaN	NaN	NaN	NaN	NaN
BAG5	A8K5J7;A0A024R6M6;Q9UL15	BAG family molecular chaperone regulator 5	NaN	NaN	NaN	NaN	NaN	NaN	NaN	NaN	NaN	NaN	NaN	NaN	NaN	NaN	NaN	NaN	NaN	NaN	NaN	NaN	NaN	NaN	NaN	NaN	NaN	NaN	NaN	NaN	NaN	NaN	NaN	NaN	NaN	NaN	NaN	NaN	NaN	NaN	NaN	NaN	NaN	NaN	NaN	NaN	NaN	NaN
CDC42BPB	A0A024R6N2;Q9Y5S2	Non-specific serine/threonine protein kinase;Serine/threonine-protein kinase MRCK beta	NaN	0.436959	0.684156	NaN	0.0801795	0.240128	0.778878	0.976261	NaN	1.97574	0.223003	1.25185	3.38879	1.25133	NaN	NaN	0.166325	-0.439912	0.935451	-0.523321	NaN	NaN	0.512492	0.651858	0.432182	-0.110096	0.481113	0.299365	0.0348696	-0.364155	-0.379843	-0.0486697	-0.577344	-0.198871	0.267948	-0.190046	NaN	NaN	0.190129	NaN	-0.0635596	1.01916	-0.822363	NaN	NaN	-0.565597
SERPINA3	A0A024R6P0;B3KS79;P01011;G3V3A0	Alpha-1-antichymotrypsin;Alpha-1-antichymotrypsin His-Pro-less	NaN	NaN	0.775021	NaN	NaN	NaN	NaN	NaN	NaN	NaN	NaN	NaN	NaN	5.24348	NaN	NaN	NaN	NaN	4.66235	NaN	NaN	NaN	NaN	NaN	NaN	NaN	NaN	NaN	NaN	NaN	NaN	NaN	NaN	NaN	NaN	NaN	3.77385	2.78091	5.34046	NaN	NaN	NaN	NaN	NaN	NaN	3.23936
EIF5	A0A024R6Q1;P55010;Q6IBU0	Eukaryotic translation initiation factor 5	0.296771	NaN	-0.307408	NaN	0.115066	0.961283	NaN	-0.272885	-0.486228	-0.662784	-0.692949	0.223195	-1.28564	-0.524113	-0.783236	0.915201	NaN	0.634449	-0.686254	-1.13696	-0.289291	-0.342585	-0.400429	-0.741869	NaN	-0.751949	-0.0646666	-0.978698	-0.886773	-0.764431	-1.21274	0.873503	0.471129	0.814597	NaN	-1.14303	NaN	NaN	0.14108	-1.37629	-0.988267	-0.835621	-0.881043	NaN	-1.90743	-0.552899
TRMT61A;C14orf172	Q96B39;H0Y2Q1;A0A024R6Q2;Q96FX7	tRNA (adenine(58)-N(1))-methyltransferase catalytic subunit TRMT61A	NaN	NaN	NaN	NaN	-0.49375	NaN	NaN	NaN	NaN	NaN	NaN	NaN	NaN	NaN	NaN	NaN	NaN	NaN	NaN	NaN	NaN	NaN	NaN	NaN	NaN	NaN	NaN	NaN	NaN	NaN	NaN	NaN	NaN	NaN	NaN	NaN	NaN	NaN	NaN	NaN	NaN	NaN	NaN	NaN	NaN	NaN
DNAJA2	A0A024R6S1;O60884	DnaJ homolog subfamily A member 2	0.133921	1.40784	-0.279908	-1.208	0.564331	-0.634182	0.618938	-0.200178	-0.380489	0.559925	0.847406	-0.858637	-0.520345	-0.328237	-0.543443	0.183437	0.47394	-0.668234	-0.235305	0.749761	-0.170916	-0.355509	0.551099	-0.394915	-0.690061	-0.0217603	-0.132861	1.04481	-0.325666	0.269414	-0.91677	-0.111072	0.253722	-0.422408	0.619503	-0.941382	2.50038	-2.19039	-0.273171	-0.308011	-0.351503	0.181017	-0.35479	-0.646845	-1.77716	-1.12127
FAM192A;NIP30	H3BQQ6;H3BTI2;H3BTP8;H3BSY6;H3BP64;H3BUL4;H3BMX9;A0A024R6T8;Q9GZU8;H3BPH9;H3BPF9;H3BN22;Q6P4H7;H3BSF0;H3BU93;Q2VIL1	Protein FAM192A	NaN	NaN	NaN	NaN	NaN	NaN	NaN	NaN	NaN	NaN	NaN	NaN	0.925577	NaN	NaN	NaN	NaN	NaN	NaN	NaN	NaN	NaN	0.667974	NaN	NaN	NaN	NaN	NaN	NaN	NaN	NaN	NaN	NaN	NaN	NaN	NaN	NaN	NaN	NaN	NaN	NaN	NaN	NaN	NaN	NaN	NaN
hCG_2025883;COQ9	A0A024R6U3;O75208;B4DIV2;H3BNT2;H3BPY0;H3BSJ5	Ubiquinone biosynthesis protein COQ9, mitochondrial	-0.176286	1.03774	-0.398637	-0.27085	-1.48398	0.370758	-0.0792101	-0.11105	-0.639545	0.251641	-0.152508	NaN	0.246232	0.681554	-0.789647	0.684786	NaN	1.20519	0.924762	-0.731554	0.168025	NaN	0.25546	0.344959	0.952025	-0.873092	-1.02945	0.101571	-1.57328	-1.16282	-0.482332	-1.21301	NaN	NaN	-0.161823	-0.266877	-1.03513	-0.887915	-1.00935	-1.56252	-0.983951	-1.87763	NaN	-1.70381	-1.79277	-1.26097
MMP15	A0A024R6U8;P51511;Q7KZY0	Matrix metalloproteinase-15	-0.654077	-0.211137	-0.31302	NaN	NaN	1.25401	-0.736044	-1.57928	NaN	-0.983167	-0.721203	NaN	0.694489	-1.31823	1.0619	-1.28313	-0.4537	0.193222	-0.673799	-0.418891	-1.543	0.248793	1.543	NaN	-1.01021	NaN	1.57992	NaN	NaN	NaN	0.547405	-1.07724	0.617122	-0.946881	NaN	1.92741	NaN	NaN	-0.415867	NaN	NaN	NaN	NaN	NaN	NaN	3.09776
NDRG4	A0A024R6V8;H3BPQ3;B7Z9X4;B3KX54;H3BQJ4;A0A0S2Z5L7;A0A0S2Z5R7;Q9ULP0	Protein NDRG4	NaN	-0.666848	NaN	NaN	NaN	NaN	NaN	NaN	NaN	NaN	NaN	NaN	NaN	NaN	NaN	NaN	NaN	NaN	NaN	NaN	NaN	NaN	NaN	NaN	NaN	NaN	-0.123136	NaN	NaN	NaN	NaN	NaN	NaN	NaN	NaN	NaN	NaN	NaN	NaN	NaN	NaN	NaN	NaN	NaN	NaN	NaN
GOT2	A0A024R6W0;P00505;B3KUZ8;A8K482	Aspartate aminotransferase;Aspartate aminotransferase, mitochondrial	-0.225768	-0.144872	0.133343	-0.236381	-1.09461	-0.0256011	-0.650378	-0.267605	-0.670431	-0.437852	0.0968464	-0.174052	-0.801542	-0.0817166	-0.122561	-0.351404	-0.58406	0.0510542	0.225703	0.422167	0.777833	-0.180424	-0.134102	0.649853	0.329861	0.586148	-0.513581	0.0213639	0.126055	0.787073	0.149281	-0.260218	-0.470089	0.382062	-0.00221635	0.42769	0.0164047	0.250299	0.175298	0.582932	0.541237	0.228061	0.452494	0.178325	0.637433	0.00190958
NUDT21	B2R6U8;A0A024R6W2;O43809;H3BND3	Cleavage and polyadenylation specificity factor subunit 5	-1.59565	1.39905	-1.9914	-0.3956	0.919339	-1.31556	0.0868598	-0.62591	-0.0618186	-0.013712	1.01158	1.63935	1.27233	0.710307	-0.292156	-0.950181	-0.49906	0.334207	-0.494741	0.14949	-0.339748	0.429634	-0.235935	-1.32239	-0.712464	-1.47234	0.366615	-1.01984	NaN	-0.93259	-0.315682	-0.599301	NaN	-1.30118	-1.07444	-1.32895	0.319709	-0.126841	0.269356	-2.2912	-2.25191	-1.49549	-2.24353	-1.60926	-1.58928	-2.01361
RRAD	A8K3J8;A0A024R6X0;P55042;Q92788	GTP-binding protein RAD	NaN	-0.328492	NaN	NaN	0.0981349	0.590571	NaN	NaN	NaN	-0.0418037	-0.358212	NaN	0.201808	-1.02652	0.919424	NaN	-0.115549	-1.7461	-0.676174	-0.222063	NaN	NaN	NaN	0.0632734	-1.09937	-1.05398	NaN	-1.15646	NaN	NaN	NaN	-1.16202	NaN	NaN	NaN	-0.576667	NaN	NaN	-0.92037	-1.1099	NaN	-0.726046	NaN	NaN	NaN	NaN
CES2	Q53H57;A0A024R6X1;O00748;Q6IPK9;Q4G0E9	Carboxylic ester hydrolase;Cocaine esterase	NaN	NaN	NaN	NaN	NaN	NaN	NaN	NaN	NaN	NaN	NaN	NaN	NaN	NaN	NaN	NaN	NaN	NaN	NaN	NaN	NaN	NaN	2.17501	NaN	NaN	0.898939	NaN	1.06124	NaN	NaN	NaN	NaN	NaN	1.26621	NaN	NaN	NaN	NaN	NaN	0.585172	NaN	NaN	NaN	NaN	NaN	NaN
CBFB	J3KRT0;J3KS23;A0A024R6X2;A8K719;Q13951	Core-binding factor subunit beta	NaN	NaN	NaN	0.0650382	1.03083	NaN	NaN	-0.321582	NaN	-0.410178	0.195385	NaN	NaN	NaN	-0.572114	NaN	NaN	NaN	0.293642	NaN	NaN	-0.0731348	NaN	NaN	NaN	NaN	NaN	NaN	NaN	NaN	NaN	0.594901	NaN	NaN	NaN	NaN	NaN	NaN	NaN	NaN	NaN	NaN	NaN	NaN	NaN	NaN
NUTF2	A0A024R6Y2;P61970;H3BRV9	Nuclear transport factor 2	0.464878	0.0688768	0.160017	-0.237641	0.744318	-0.24775	0.39122	-0.986229	NaN	-0.30062	NaN	-0.539655	-0.210333	0.3786	-0.103866	-0.199491	0.043988	0.0578871	0.332929	0.175327	-1.66138	NaN	-0.700111	0.360063	0.130533	0.233336	-0.270064	0.116072	-0.89375	NaN	-0.570657	-0.16023	-0.909911	0.680058	-0.90789	0.656196	-1.27894	0.511419	-0.56193	0.0474204	-1.55316	1.48536	-1.57133	-0.465609	-0.920779	-0.7122
DYNC1LI2	A0A024R6Z0;O43237;J3KRI4	Cytoplasmic dynein 1 light intermediate chain 2	NaN	NaN	NaN	NaN	0.824776	NaN	NaN	2.96748	NaN	NaN	NaN	2.2614	NaN	NaN	2.66923	NaN	2.75779	NaN	NaN	1.67696	NaN	NaN	NaN	NaN	2.04817	2.54069	1.33094	1.07388	NaN	NaN	NaN	NaN	NaN	NaN	NaN	NaN	NaN	NaN	NaN	NaN	NaN	NaN	NaN	NaN	NaN	NaN
SRPK2	A0A024R704;P78362	SRSF protein kinase 2;SRSF protein kinase 2 N-terminal;SRSF protein kinase 2 C-terminal	2.28778	NaN	NaN	NaN	NaN	NaN	NaN	NaN	NaN	NaN	NaN	NaN	NaN	NaN	NaN	NaN	NaN	NaN	2.03357	NaN	NaN	NaN	NaN	2.54894	NaN	NaN	NaN	NaN	NaN	NaN	NaN	NaN	NaN	NaN	NaN	NaN	NaN	NaN	NaN	NaN	NaN	NaN	NaN	NaN	NaN	NaN
VPS4A;DKFZp434E0418	I3L4J1;A0A024R705;Q9UN37;Q9NXK5;Q9UF30	Vacuolar protein sorting-associated protein 4A	-0.633404	-1.20364	0.133578	NaN	NaN	-0.509138	NaN	-0.439157	-0.900026	-0.91265	-0.601602	-0.145612	-0.263635	NaN	NaN	-0.970044	NaN	NaN	-0.60966	-0.831582	-0.42191	NaN	NaN	NaN	-1.40964	NaN	-1.44069	NaN	NaN	NaN	NaN	-0.153416	-0.444059	NaN	-0.580859	-1.06157	NaN	NaN	NaN	NaN	-0.441566	NaN	NaN	NaN	NaN	NaN
PRKAR2B	Q6DHZ2;A0A024R712;P31323;B3KY43;Q75MP1	cAMP-dependent protein kinase type II-beta regulatory subunit	-1.3466	0.527046	-0.631191	-2.22802	0.120383	-0.252294	-0.544627	-0.987713	-1.19959	-0.704612	-0.841092	-0.496617	0.0770636	-0.618767	-1.39981	-2.9294	-0.351421	-0.320652	-1.26284	-1.3688	-1.76677	-1.08251	0.291695	-0.70878	-1.4723	-1.73712	-1.0724	-2.24617	-0.808645	-0.303165	-1.22368	0.0298288	-0.123317	-1.40278	-1.0626	-0.687352	-0.125642	-1.13915	-0.119501	-1.72392	-1.59625	-0.980025	-2.02551	-1.3581	-2.33957	-0.398445
DLD	B4DFL1;A0A024R713;P09622;E9PEX6;B4DMK9	Dihydrolipoyl dehydrogenase;Dihydrolipoyl dehydrogenase, mitochondrial	0.460755	0.887844	0.531425	0.972052	0.428917	0.613737	0.181394	1.22595	0.788934	0.923695	0.37779	-0.0998764	0.630885	0.942312	0.923578	0.846582	0.738089	1.34182	0.61682	0.441403	0.562857	0.890087	0.322252	1.00617	0.928447	1.05165	0.968835	0.486014	0.886793	1.58318	1.13163	0.634521	0.696193	1.32359	1.07079	1.39349	1.16665	1.20861	1.129	1.41974	1.2811	0.685259	1.07577	0.93347	1.15202	0.812576
PBEF1;NAMPT	A0A024R718;P43490;A0A0C4DFS8	Nicotinamide phosphoribosyltransferase	0.924492	0.934071	0.184814	0.434238	0.212317	0.807488	0.955662	0.6769	1.34887	0.964236	0.684919	0.603017	-0.318361	0.711162	1.12329	NaN	0.520868	0.143603	1.87713	0.718134	NaN	-0.310052	-0.308911	-0.17318	-0.13829	0.740957	0.375253	0.112986	-0.150274	0.267519	-0.218729	0.149981	-0.720424	0.324286	0.608297	-0.815029	0.674913	0.107448	1.12888	NaN	-0.369476	0.0751551	-0.645148	NaN	0.580746	0.249814
SNTB2	A0A024R732;Q13425;H0YCS0	Beta-2-syntrophin	0.839113	1.0046	NaN	0.123513	0.870414	NaN	0.172311	-0.0480967	0.187626	NaN	NaN	0.456254	0.0552315	0.247738	-0.0699455	-0.661851	0.833567	0.433579	0.630595	0.0513096	NaN	1.78772	0.617425	NaN	0.247131	0.339747	0.594711	NaN	2.07072	-0.0855607	-0.199009	-0.139328	0.721328	NaN	0.751669	-0.430927	0.533535	0.125757	1.19681	NaN	-0.307071	NaN	NaN	NaN	-0.272859	0.0215554
NDUFA5	A0A024R745;Q16718;A0A087X1G1;H7BYD0;F8WAS3;C9IZN5	NADH dehydrogenase [ubiquinone] 1 alpha subcomplex subunit 5	0.444872	-0.957184	-0.461168	-0.341337	-1.34015	0.256561	-0.926907	-0.438731	-0.624137	-0.355826	0.372237	-0.523358	-1.27541	-0.206227	-1.42129	-1.4197	-0.518414	-1.08437	-0.137784	-0.765433	-0.294704	-0.103854	-0.347295	-0.66303	-1.0238	0.446855	-0.952522	-0.417676	-2.13343	-1.1849	-0.213024	-0.348516	-0.677348	-0.758574	0.203917	-1.04989	-2.03878	-1.12401	-0.177089	-0.322956	-0.00425623	-0.0272202	0.315264	-1.31844	0.441095	-0.865204
PNPLA8;IPLA2(GAMMA)	A0A0C4DG51;A8K6U0;A0A024R746;Q9NP80	Calcium-independent phospholipase A2-gamma	NaN	NaN	NaN	NaN	NaN	-2.16169	-1.35699	NaN	NaN	NaN	NaN	NaN	0.107088	NaN	NaN	NaN	NaN	NaN	NaN	NaN	NaN	NaN	NaN	NaN	NaN	NaN	NaN	NaN	NaN	NaN	NaN	NaN	NaN	0.165192	NaN	NaN	NaN	NaN	NaN	NaN	NaN	NaN	NaN	NaN	NaN	NaN
NRF1	A0A024R770;A0A024R774;Q16656;C9JP85	Nuclear respiratory factor 1	NaN	NaN	NaN	NaN	NaN	NaN	NaN	NaN	NaN	NaN	NaN	NaN	NaN	NaN	NaN	NaN	NaN	NaN	NaN	NaN	NaN	NaN	NaN	NaN	NaN	NaN	NaN	NaN	NaN	NaN	NaN	NaN	NaN	NaN	NaN	NaN	NaN	NaN	NaN	NaN	NaN	NaN	NaN	NaN	NaN	NaN
BPGM	B3KUR3;A0A024R782;P07738	Bisphosphoglycerate mutase	NaN	NaN	NaN	NaN	NaN	NaN	NaN	NaN	NaN	NaN	NaN	NaN	NaN	NaN	NaN	NaN	NaN	NaN	NaN	NaN	NaN	NaN	NaN	NaN	NaN	NaN	NaN	NaN	NaN	NaN	NaN	NaN	NaN	NaN	NaN	NaN	NaN	NaN	NaN	NaN	NaN	NaN	NaN	NaN	NaN	NaN
TRIM24	A0A024R784;O15164;B4DYZ9;Q6ZSA6	Transcription intermediary factor 1-alpha	NaN	NaN	NaN	NaN	NaN	NaN	NaN	NaN	NaN	NaN	NaN	NaN	NaN	NaN	NaN	NaN	NaN	NaN	NaN	NaN	NaN	NaN	NaN	NaN	NaN	NaN	NaN	NaN	NaN	NaN	NaN	NaN	NaN	NaN	NaN	NaN	NaN	NaN	NaN	NaN	NaN	NaN	NaN	NaN	NaN	NaN
TNPO3	B2R6H7;A0A024R794;Q9Y5L0;B3KMX1;B3KM69;E9PFH4;C9J7E5	Transportin-3	NaN	NaN	NaN	NaN	NaN	-1.57565	NaN	NaN	NaN	NaN	NaN	NaN	NaN	NaN	NaN	NaN	NaN	NaN	NaN	NaN	NaN	NaN	NaN	NaN	NaN	-1.51208	NaN	NaN	NaN	NaN	NaN	NaN	NaN	NaN	NaN	NaN	NaN	NaN	NaN	NaN	NaN	NaN	NaN	NaN	NaN	NaN
SLC44A2	A0A024R798;A0A024R7D2;A0A088QF11;A0A088QCU6;Q8IWA5	Choline transporter-like protein 2	NaN	-0.261386	-0.0806576	NaN	0.720295	-0.383386	1.22354	NaN	NaN	0.37329	1.12061	NaN	-0.404903	0.780647	0.510868	0.285399	0.257528	NaN	0.636683	NaN	NaN	0.843992	0.204357	NaN	0.00314849	NaN	0.209636	NaN	NaN	NaN	NaN	-0.134878	0.303276	NaN	0.341245	NaN	NaN	0.431929	0.375927	0.129024	NaN	NaN	NaN	NaN	NaN	NaN
AKR1B1	A0A024R7A8;P15121;Q59EL5;E9PCX2	Aldose reductase	-0.993274	-0.711326	-1.3981	-0.560795	-0.974806	-1.14824	-0.989523	-1.18196	-0.620963	-0.691486	-0.66703	-0.595248	-0.571498	-0.559244	-0.0313002	-0.458519	-0.530995	-0.21242	-0.717455	-0.92139	-0.893721	-0.738962	-0.359069	-0.644155	-0.469898	-0.849481	-0.476734	-0.47209	-0.395576	-0.251236	-0.427739	-0.409473	-0.882703	0.502112	-0.547983	-0.850099	-0.299294	-0.0985101	-1.07662	-0.838883	-0.650224	-0.464457	-0.509751	0.172679	-0.252042	-0.802853
CDC37	A0A024R7B7;Q16543;Q6FG59;K7EQA9;K7EKQ2	Hsp90 co-chaperone Cdc37;Hsp90 co-chaperone Cdc37, N-terminally processed	-0.418784	-0.895182	-0.744031	0.420838	-0.43284	-0.142783	1.64497	-0.475193	-1.36322	-0.228091	-0.420024	-0.00861812	-0.272801	1.50062	-0.881263	-1.35109	0.602383	0.985373	-0.76114	-0.544168	0.214512	1.13179	0.000225745	0.297938	-0.56511	0.906301	0.7529	-0.783163	0.039953	0.0562465	1.14315	-0.443778	0.605479	0.564511	-1.7451	-0.334983	1.38455	0.566275	-0.4728	1.24018	1.10684	-0.637378	NaN	-0.646992	NaN	-0.803719
MRPL4	K7ES61;A0A024R7C5;Q9BYD3;K7EKI4;K7ELF1;K7ELQ0	39S ribosomal protein L4, mitochondrial	-0.49003	NaN	NaN	-0.357946	-0.386564	-0.756852	-0.508747	-0.569532	0.230939	-0.785412	-0.891283	-0.317895	NaN	-0.769179	-0.605305	NaN	0.173661	-0.155326	NaN	-0.94986	NaN	NaN	-0.614791	0.831948	-0.97284	-0.116099	-0.654527	NaN	NaN	-0.524465	NaN	NaN	-0.534659	NaN	NaN	-0.378512	NaN	-1.08658	-1.19912	-0.856548	-0.136323	0.0983017	NaN	NaN	NaN	NaN
ILF3	A0A024R7C7;Q12906;F4ZW64;A8K590;F4ZW65;F4ZW66;B4DFG4;Q59GP7	Interleukin enhancer-binding factor 3	-0.418564	-0.514242	-2.02904	-0.311462	-0.81464	-1.8705	-0.729203	-0.637107	-1.16037	-0.270489	-0.338158	-0.394433	-1.52793	-1.2963	-0.754909	-1.26838	-0.11431	-0.938318	-0.92036	-0.330624	-0.502723	0.0581303	-2.9842	-1.41449	-0.738501	-0.878314	-1.98594	-2.29934	-0.516805	-0.682521	-1.8332	-0.970336	-1.66928	-0.631054	-1.10452	-0.85904	-0.750269	-1.09399	-0.215021	-1.27566	-3.37461	-0.691013	-1.09438	-2.12493	-1.69486	-0.809425
TMEM205;UNQ501	K7ELQ9;A0A024R7D3;Q6UW68;K7ER05;K7EJQ9;K7EM09;K7EPR0	Transmembrane protein 205	0.0690391	0.142713	-0.485324	0.562389	1.31567	0.55277	2.66598	-0.708749	0.258676	0.00923353	0.569103	0.180318	1.95333	0.451662	0.159576	-0.254836	2.2918	1.43405	-0.498669	-0.214622	NaN	0.893786	0.207878	0.382523	0.39142	-1.01457	0.402833	0.997434	-0.809364	0.147138	0.137589	-0.222063	-0.164801	-0.111566	0.247269	0.899875	0.400606	NaN	-0.421264	-0.0673633	-0.195852	-0.140863	-0.32435	NaN	-0.416624	0.448233
DNMT1	A0A024R7E3;P26358;Q59FP7	DNA (cytosine-5)-methyltransferase;DNA (cytosine-5)-methyltransferase 1	NaN	NaN	NaN	NaN	NaN	NaN	NaN	NaN	NaN	NaN	NaN	NaN	NaN	NaN	NaN	NaN	NaN	NaN	NaN	NaN	NaN	NaN	NaN	NaN	NaN	NaN	NaN	NaN	NaN	NaN	NaN	NaN	NaN	NaN	NaN	NaN	NaN	NaN	NaN	NaN	NaN	NaN	NaN	NaN	NaN	NaN
PRKCSH	A0A024R7F1;K7ELL7;B4DJQ5;P14314;A0A0S2Z4D8;A0A0S2Z4W7;A2VCQ4;A0A0S2Z4A0	Glucosidase 2 subunit beta	-1.12575	-0.44919	-1.35176	-0.606886	-0.365478	-0.584007	0.0405548	-0.0586273	0.0467319	-0.396461	-0.209908	0.0373836	-0.985436	-0.794146	-0.277298	-1.12098	-0.869792	-1.09918	-0.785033	-0.819648	-1.46232	-0.301428	-1.20078	-0.786088	-1.23127	-0.455759	-0.929715	0.689788	-0.0598382	-0.00542305	-0.30373	-0.857558	-0.65916	-0.986332	-0.193531	-0.866203	-1.20617	-1.08224	-0.607028	-1.09979	-0.939159	-0.872734	-0.999598	-1.22924	-0.984218	-0.236247
GCDH	A0A024R7F9;Q92947;B4DK85;B4DUY0	Glutaryl-CoA dehydrogenase, mitochondrial	0.160198	-0.204977	0.0419053	-1.2885	0.208223	0.708925	1.5137	0.340384	0.686454	0.723907	0.685355	-0.0334678	0.0226867	0.947818	-0.0701571	-0.853769	-0.00830615	-0.340736	0.499266	0.111134	0.673975	1.22235	-0.0632548	0.365645	-0.0252342	-0.245051	0.533676	-0.274285	-0.151272	-0.63821	-0.859481	-0.144156	0.137753	NaN	0.322215	0.133129	0.358026	0.977526	0.535636	0.432575	0.0180743	1.06867	0.361979	-0.267596	1.36172	0.544128
RAB3D;RAB3A	B2R8W8;A0A024R7G2;O95716;A0A024R7I7;P20336;M0R257;B4DE50	Ras-related protein Rab-3D;Ras-related protein Rab-3A	NaN	NaN	NaN	NaN	NaN	NaN	NaN	NaN	NaN	NaN	NaN	NaN	NaN	NaN	NaN	NaN	NaN	NaN	NaN	NaN	NaN	NaN	NaN	NaN	NaN	NaN	NaN	NaN	NaN	NaN	NaN	NaN	NaN	NaN	NaN	NaN	NaN	NaN	NaN	NaN	NaN	NaN	NaN	NaN	NaN	NaN
EPS15L1	A0A024R7G6;M0R165;A8K5P4;Q9UBC2;A5PKY0;B4DME4;B4DQX5;M0R2S2	Epidermal growth factor receptor substrate 15-like 1	-0.455123	0.302457	-1.22743	0.0480323	-0.221837	-0.274053	0.219186	-0.503654	0.315788	0.610634	-0.357704	1.1183	-0.0515886	0.000350818	0.84882	-0.035013	0.589594	-0.577634	0.0243054	-2.03099	1.73519	NaN	-0.0695913	2.86281	0.175211	0.265048	-0.188781	NaN	-1.40218	0.984731	NaN	-0.918386	0.624244	-0.236095	1.03451	NaN	NaN	NaN	-1.81147	NaN	-1.06171	-1.7471	-1.15077	NaN	NaN	NaN
SLC35E1	A0A024R7G7;Q96K37	Solute carrier family 35 member E1	NaN	NaN	NaN	NaN	NaN	NaN	NaN	NaN	NaN	NaN	NaN	NaN	NaN	NaN	NaN	NaN	NaN	NaN	NaN	NaN	NaN	NaN	NaN	NaN	NaN	NaN	NaN	NaN	NaN	NaN	NaN	NaN	NaN	NaN	NaN	NaN	NaN	NaN	NaN	NaN	NaN	NaN	NaN	NaN	NaN	NaN
RAD23A	A8K1J3;A0A024R7G8;P54725;K7ENJ0;K7ELW1	UV excision repair protein RAD23 homolog A	NaN	NaN	-0.789813	NaN	NaN	NaN	NaN	NaN	NaN	NaN	NaN	NaN	NaN	NaN	NaN	NaN	NaN	NaN	NaN	-0.66102	NaN	NaN	NaN	NaN	NaN	NaN	NaN	NaN	NaN	NaN	NaN	NaN	NaN	NaN	NaN	NaN	1.91615	NaN	1.72137	-0.444459	-0.620962	NaN	NaN	NaN	NaN	NaN
BST2	A0A024R7H5;B4E0Z6;Q10589	Bone marrow stromal antigen 2	NaN	-0.241311	NaN	NaN	-0.994197	-0.180021	-1.60805	NaN	0.234058	-0.670206	-1.29384	-0.213005	-1.24068	-1.71576	NaN	-1.8406	-0.460795	NaN	NaN	NaN	NaN	NaN	-1.02659	-1.52812	NaN	NaN	NaN	NaN	NaN	NaN	NaN	NaN	-1.57657	NaN	NaN	NaN	-2.41689	NaN	NaN	NaN	NaN	NaN	NaN	NaN	NaN	NaN
GIPC1	A8K2I7;A0A024R7I0;O14908;K7EM11;A0A024R7I1	PDZ domain-containing protein GIPC1	0.0338945	-0.464135	NaN	-1.70863	-0.153482	NaN	NaN	-0.837459	NaN	-0.43157	NaN	-1.06336	-0.821384	-0.794437	0.120765	-0.97739	-0.791522	-0.0736831	NaN	-0.505383	NaN	NaN	0.00348103	-0.691981	-0.570171	NaN	NaN	-0.714664	NaN	-0.282855	-1.57555	-0.739848	-0.831715	-0.454294	-0.65205	-1.24019	NaN	-0.751806	NaN	NaN	NaN	NaN	NaN	NaN	NaN	NaN
RAB8A	A0A024R7I3;P61006;Q59EP4	Ras-related protein Rab-8A	NaN	1.85449	NaN	1.48257	-0.0968015	NaN	NaN	NaN	NaN	1.23436	NaN	NaN	0.231789	1.07227	NaN	NaN	NaN	1.01628	NaN	NaN	NaN	1.45324	NaN	NaN	NaN	NaN	NaN	NaN	NaN	NaN	NaN	NaN	NaN	NaN	NaN	NaN	NaN	NaN	NaN	NaN	NaN	-0.292691	NaN	NaN	NaN	NaN
PRKACA;KIN27	A0A024R7J0;P17612;A8K8B9;Q15136;K7ERP6	cAMP-dependent protein kinase catalytic subunit alpha	-0.840454	0.319502	-0.672621	-0.952839	-0.801758	-0.553409	-0.0738109	-0.300138	-0.713521	-0.306283	-0.418901	-0.393074	-0.735185	-0.535185	-0.155577	-0.866721	-0.455424	-0.173189	-1.09622	-1.05308	-0.759212	-0.365448	-0.821037	-0.139249	-0.89735	-0.52693	-0.483379	-0.429219	-0.294831	-0.353774	-0.53167	-0.444266	-0.370593	-0.631815	-0.570943	-0.599017	0.669872	-0.0280931	0.158182	-0.3836	-0.653269	-0.279572	-0.725932	-0.771128	-0.871446	-0.49869
SFRS14;SUGP2	A8K5G0;A0A024R7K0;M0R2Z9;Q8IX01;M0R3F6	SURP and G-patch domain-containing protein 2	-0.0459321	0.722475	1.03917	0.640873	2.15349	0.503	0.519052	0.065499	-0.434912	0.684981	0.750996	0.940171	0.512289	1.15787	1.52666	0.455144	0.491671	0.396207	-0.866799	-0.412402	-0.828061	NaN	0.688355	0.529239	1.23058	NaN	0.567598	-0.351855	-0.89243	-0.960027	-0.117143	1.76105	0.340203	-0.104758	1.014	-1.45302	-0.00388998	0.298333	0.30228	NaN	NaN	NaN	NaN	NaN	0.47277	1.25753
AP1M1	E7ENJ6;B3KNH5;A0A024R7K8;Q9BXS5;K7EJL1;B4DDG7;B4DN99;Q59EK3	AP-1 complex subunit mu-1	1.34457	NaN	NaN	NaN	NaN	NaN	NaN	NaN	2.55275	NaN	-0.153961	0.982021	NaN	NaN	1.2723	NaN	NaN	NaN	NaN	0.227185	NaN	NaN	NaN	NaN	2.47041	NaN	NaN	NaN	NaN	NaN	NaN	0.324889	NaN	0.360027	NaN	NaN	NaN	NaN	NaN	NaN	NaN	NaN	NaN	NaN	NaN	3.53716
SSBP2;SSBP4;SSBP3	A1L192;D6RAC5;U3KQ46;B7Z4K7;A0A087WVT6;A0A087X159;A0A024R7K9;P81877;Q9BWG4;Q9BWW4	Single-stranded DNA-binding protein 2;Single-stranded DNA-binding protein 4;Single-stranded DNA-binding protein 3	NaN	NaN	NaN	NaN	NaN	NaN	NaN	NaN	NaN	NaN	NaN	NaN	NaN	NaN	NaN	NaN	NaN	NaN	NaN	NaN	NaN	NaN	NaN	NaN	NaN	NaN	NaN	NaN	NaN	NaN	NaN	NaN	NaN	NaN	NaN	NaN	NaN	NaN	NaN	NaN	NaN	NaN	NaN	NaN	NaN	NaN
BABAM1;HSPC142	M0R3F4;M0R2A4;M0R2K3;M0R193;M0R0I0;M0R2I2;A0A024R7L2;Q9NWV8;M0QYV1;M0QXG9;J3KQS6	BRISC and BRCA1-A complex member 1	NaN	NaN	NaN	NaN	NaN	NaN	NaN	NaN	NaN	NaN	NaN	NaN	NaN	NaN	NaN	NaN	NaN	NaN	NaN	NaN	NaN	NaN	NaN	NaN	NaN	NaN	NaN	NaN	NaN	NaN	NaN	NaN	NaN	-0.35682	NaN	NaN	NaN	NaN	NaN	NaN	NaN	NaN	NaN	NaN	NaN	NaN
UPF1	A0A024R7L5;A0A024R7L8;Q92900	Regulator of nonsense transcripts 1	0.272211	-0.319757	-0.336921	0.277346	0.344841	0.227	0.343686	-0.419076	-0.111833	0.962266	0.110296	0.0452357	0.0481213	0.0895812	-1.37623	-0.214751	-1.03513	-0.741223	-0.0326347	0.175447	0.610742	-0.329985	0.12008	-0.263945	-0.710504	-0.442239	-0.421526	-0.164926	0.0344458	-0.0747794	-0.850559	0.816296	0.384724	-0.524417	0.222567	-0.689464	-0.484808	-0.738206	-0.0821407	-0.124144	-1.28096	-0.33957	-1.47656	-1.34056	-1.28983	-1.01378
MVB12A;LOC93343	E9PQA6;A8K0C2;A0A024R7L6;Q96EY5;E9PLL0;E9PJW8	Multivesicular body subunit 12A	NaN	NaN	NaN	NaN	NaN	NaN	NaN	NaN	NaN	NaN	NaN	NaN	NaN	NaN	NaN	NaN	NaN	NaN	NaN	NaN	NaN	NaN	NaN	NaN	NaN	NaN	NaN	NaN	NaN	NaN	NaN	NaN	NaN	NaN	NaN	NaN	NaN	NaN	NaN	NaN	NaN	NaN	NaN	NaN	NaN	NaN
TMED9	B2R8A2;A0A024R7M0;Q9BVK6	Transmembrane emp24 domain-containing protein 9	-0.310702	0.437408	-0.163269	-0.900413	-0.141956	1.45553	-0.625925	-0.682988	-0.107554	-1.23769	0.507521	0.0623199	-1.33006	0.135466	0.484353	0.189044	NaN	-0.0344974	-0.823749	-0.464912	NaN	-0.129448	-0.358918	-0.0114334	0.190572	-0.891018	-0.504074	0.164884	NaN	0.0989714	0.817229	-0.0549179	-1.18123	-1.16889	-0.743041	-0.827998	NaN	-1.54679	-0.61306	-1.60061	-1.46508	NaN	-1.13048	NaN	NaN	-0.711847
LOC115098;CCDC124	A0A024R7M8;Q96CT7;M0R2F5	Coiled-coil domain-containing protein 124	NaN	-0.776196	NaN	-0.156914	-0.889432	-0.27473	0.54459	-0.814345	-0.26135	0.755482	NaN	-1.10655	-0.513794	-1.63605	-1.00795	-1.33422	0.791882	0.0783808	-0.454313	0.161295	NaN	NaN	NaN	NaN	-0.448478	-0.597507	-0.942487	-0.911346	NaN	NaN	NaN	NaN	NaN	-0.376513	NaN	NaN	NaN	NaN	NaN	NaN	-0.935762	NaN	NaN	NaN	NaN	NaN
ATP13A1	A0A024R7P3;A0A024R7N2;Q9HD20	Manganese-transporting ATPase 13A1	-0.727304	1.57509	-0.978635	0.785178	0.888969	NaN	-0.567448	0.498892	-0.227248	0.597583	-0.74932	0.744313	NaN	0.290732	0.235909	-0.554933	NaN	0.914732	0.816571	0.441955	NaN	1.10178	0.77057	0.178812	-0.734135	NaN	0.418336	-0.219711	-0.260989	NaN	NaN	0.827768	0.239883	NaN	0.210897	NaN	0.21985	-1.06619	0.276302	NaN	0.691127	NaN	-0.895303	0.263993	NaN	NaN
CLTB	A0A024R7S3;P09497	Clathrin light chain B	1.17608	-0.36514	-0.711175	1.90834	-0.43249	0.705382	1.37728	0.518802	0.700407	0.856793	0.679256	1.90643	-0.506275	0.739179	0.172338	1.9079	0.110992	-0.360887	0.0437834	0.689706	0.441485	-0.374529	0.625392	2.23963	0.498503	-1.0135	1.03048	1.77134	-0.756095	1.19539	-0.525994	-1.10638	-0.434205	2.51236	0.292877	0.883582	1.26031	-0.579856	-0.671927	2.25429	0.434559	NaN	-0.0786098	0.534101	0.920379	-0.0651974
HNRPF;HNRNPF	A0A024R7T3;P52597;B4DKS8	Heterogeneous nuclear ribonucleoprotein F;Heterogeneous nuclear ribonucleoprotein F, N-terminally processed	0.0809112	-0.379616	-0.680529	-0.67454	-0.114297	-0.907848	-0.578794	-1.25675	-0.569228	-0.851113	-0.525105	-0.369715	-0.818786	-0.775204	-0.937613	-1.01927	-0.50896	-0.664744	-0.341176	-0.613741	-0.569085	-0.146783	-0.746639	-0.343906	-0.929987	-1.16163	-0.408783	-1.13714	-0.928498	-0.895196	-1.13497	-0.668216	-0.74221	-0.936284	-1.24874	-1.12091	-0.595981	-0.691826	-0.77941	-0.686713	-0.661111	-0.750748	-1.24197	-1.20704	-1.36341	-0.332152
ZNF22	A0A024R7T4;P17026	Zinc finger protein 22	1.60117	NaN	NaN	NaN	-0.857663	-2.83845	-0.240009	NaN	NaN	NaN	NaN	NaN	-1.15257	-2.12525	NaN	NaN	NaN	-1.22027	-1.22008	0.42251	NaN	NaN	-2.45752	NaN	NaN	NaN	NaN	NaN	NaN	NaN	NaN	NaN	-2.06478	NaN	-1.15666	NaN	NaN	NaN	NaN	NaN	NaN	NaN	NaN	NaN	NaN	NaN
MCM4	B4DLA6;B3KMX0;A0A024R7U6;P33991	DNA replication licensing factor MCM4	NaN	0.93554	-1.09417	-0.34581	-0.248916	NaN	-1.08338	-0.742955	-0.559639	-0.372506	0.0584209	0.577205	0.497984	NaN	-1.18384	0.467414	0.126423	0.0682196	NaN	NaN	NaN	NaN	-0.475417	-0.0630888	-0.846318	0.0720732	0.891429	NaN	NaN	-1.45528	NaN	0.643293	0.381168	NaN	-0.137695	NaN	NaN	NaN	-0.146003	-0.435629	-1.37901	-0.342327	NaN	-1.89782	NaN	NaN
ATP6V1H	G3V126;B4E054;A0A024R7X3;A0A024R7U9;Q9UI12;Q8TF11;B3KUZ7	V-type proton ATPase subunit H	NaN	NaN	NaN	NaN	NaN	NaN	NaN	NaN	NaN	NaN	NaN	0.822733	NaN	NaN	NaN	NaN	NaN	NaN	NaN	NaN	NaN	NaN	NaN	NaN	NaN	NaN	NaN	NaN	NaN	0.724945	-1.24653	NaN	NaN	NaN	NaN	NaN	NaN	NaN	NaN	NaN	NaN	NaN	NaN	NaN	NaN	NaN
RAB2;RAB2A	A0A024R7V6;P61019;A0A0A1HAW1;E9PKL7	Ras-related protein Rab-2A	0.262667	0.273362	-0.281352	0.146917	0.631383	-0.0899085	0.338919	-0.0629904	-0.310829	-0.124744	0.0210743	-0.123821	0.389864	-0.141084	0.0557585	-0.221731	0.0851293	-0.308628	-0.18871	-0.430939	-0.298393	0.263022	-0.115069	-0.174967	-0.0305224	-0.171369	-0.23342	-0.345917	0.174576	-0.324388	-0.458401	-0.284581	-0.516884	-0.477888	-0.0845408	-0.553542	-0.442885	-0.592142	-0.474686	-0.502947	-0.570552	-0.287324	-0.645123	-0.116409	-0.784259	-0.275731
IMPAD1	A0A024R7W0;Q9NX62	Inositol monophosphatase 3	NaN	NaN	NaN	NaN	NaN	NaN	NaN	NaN	NaN	NaN	NaN	NaN	NaN	NaN	NaN	NaN	NaN	NaN	NaN	NaN	NaN	NaN	NaN	NaN	NaN	NaN	NaN	NaN	NaN	NaN	NaN	NaN	NaN	NaN	NaN	NaN	NaN	NaN	NaN	NaN	NaN	NaN	NaN	NaN	NaN	NaN
COPS5	A0A024R7W9;Q92905;Q59GH5;E5RHH5	COP9 signalosome complex subunit 5	NaN	-0.130759	NaN	0.716908	-0.0123541	NaN	NaN	NaN	-3.31852	NaN	-0.386483	NaN	NaN	NaN	NaN	NaN	NaN	-0.553655	-0.745022	NaN	NaN	NaN	NaN	NaN	NaN	NaN	0.59634	NaN	NaN	NaN	NaN	-0.762391	0.750154	NaN	NaN	NaN	NaN	NaN	-0.186881	NaN	-0.915439	NaN	-0.809661	NaN	NaN	NaN
STAU2;STAU2 variant protein	E5RJN7;E7EVI1;B7Z1P6;A0A0A0MTC4;A0A0A0MTD1;Q2TBD5;F8VPI7;A8K276;Q4LE57;E7EPX0;A0A0A0MTC6;E7EVJ4;E9PH62;A0A0A0MTC5;A0A024R7X7;Q9NUL3;G5EA18	Double-stranded RNA-binding protein Staufen homolog 2	NaN	NaN	NaN	NaN	NaN	NaN	NaN	NaN	NaN	NaN	NaN	NaN	NaN	NaN	NaN	NaN	NaN	NaN	NaN	NaN	NaN	NaN	-0.496616	NaN	NaN	NaN	-0.108459	NaN	NaN	NaN	-1.929	NaN	-0.620648	NaN	NaN	NaN	NaN	NaN	NaN	NaN	NaN	NaN	NaN	NaN	NaN	NaN
TCEB1	E5RHG8;A0A024R7Y5;Q15369;R4GMY8	Transcription elongation factor B polypeptide 1	0.149875	0.248941	0.324497	-0.185604	-0.239213	0.534498	0.494841	1.47267	-0.408483	1.03056	0.478613	-0.227262	-0.478399	-0.00859682	0.237754	0.439152	0.643679	-0.0993629	1.37898	-0.572687	-0.710191	0.555375	-0.162601	0.13909	-0.244938	0.804087	-0.122102	0.20778	-0.0333322	0.260765	-0.580744	-0.189187	-0.352229	-0.576928	-0.772318	-0.0991853	-0.307111	-0.43882	-0.43769	-0.2202	0.167631	1.1553	1.02336	0.175648	-0.200903	-0.0196822
PKIA	A0A024R7Y9;P61925;B2R4K1	cAMP-dependent protein kinase inhibitor alpha	NaN	NaN	NaN	NaN	NaN	NaN	NaN	NaN	0.810992	NaN	NaN	NaN	NaN	-0.780394	NaN	NaN	0.407115	-0.1333	NaN	NaN	NaN	NaN	NaN	2.0873	-0.260748	NaN	NaN	NaN	0.157496	0.348152	0.687474	NaN	NaN	NaN	NaN	NaN	0.287308	NaN	NaN	NaN	NaN	NaN	NaN	NaN	NaN	NaN
SDCBP	A0A024R7Z5;O00560;B4DQ93;B4DHN5;E9PBU7	Syntenin-1	NaN	NaN	NaN	NaN	NaN	NaN	NaN	0.808286	NaN	NaN	0.947334	-0.249142	NaN	NaN	NaN	NaN	NaN	NaN	NaN	0.709434	NaN	NaN	NaN	NaN	NaN	NaN	NaN	-0.00317046	NaN	-0.268434	NaN	NaN	-1.79464	NaN	NaN	NaN	NaN	-2.08301	NaN	NaN	NaN	NaN	NaN	NaN	NaN	NaN
PRKAR1B	A0A024R802;B4DM81;A8K099;P31321;H7BYW5;C9JSK5	cAMP-dependent protein kinase type I-beta regulatory subunit	NaN	NaN	NaN	NaN	NaN	NaN	NaN	NaN	NaN	NaN	NaN	NaN	-0.283803	NaN	NaN	-0.0743683	NaN	NaN	NaN	NaN	NaN	NaN	NaN	NaN	NaN	NaN	NaN	NaN	NaN	NaN	NaN	NaN	NaN	NaN	NaN	NaN	NaN	NaN	NaN	NaN	NaN	NaN	NaN	NaN	NaN	NaN
LACTB2	A0A024R811;Q53H82	Beta-lactamase-like protein 2	NaN	NaN	NaN	NaN	NaN	NaN	NaN	NaN	NaN	NaN	NaN	NaN	NaN	NaN	NaN	NaN	NaN	NaN	NaN	NaN	NaN	NaN	NaN	NaN	NaN	NaN	NaN	NaN	NaN	NaN	NaN	NaN	NaN	NaN	NaN	NaN	NaN	NaN	NaN	NaN	NaN	NaN	NaN	NaN	NaN	NaN
TTYH3	A0A024R816;Q9C0H2	Protein tweety homolog;Protein tweety homolog 3	NaN	NaN	NaN	NaN	NaN	NaN	NaN	NaN	NaN	NaN	NaN	NaN	NaN	NaN	NaN	NaN	NaN	NaN	NaN	NaN	NaN	NaN	NaN	NaN	NaN	NaN	NaN	NaN	NaN	NaN	NaN	NaN	NaN	NaN	NaN	NaN	NaN	NaN	NaN	NaN	NaN	NaN	NaN	NaN	NaN	NaN
EIF3B;EIF3S9	B4DV79;A4D210;A0A024R821;P55884;B4DXN6;Q96G38;Q86UM1	Eukaryotic translation initiation factor 3 subunit B	-0.110648	0.459229	-0.662408	0.706376	-0.524026	0.355194	0.753242	0.590293	-0.401327	-0.450534	0.306576	0.318735	-0.195679	0.423831	0.212857	-0.464467	0.256232	-0.583056	0.131136	0.13704	0.65907	-0.188128	-0.398312	-0.365872	-0.949941	-0.645644	0.185694	-0.641688	-0.358498	-0.459061	-0.523392	-0.506676	0.20815	-0.377735	-0.544855	-0.838377	-0.576487	-0.97587	-0.308653	-1.10991	-0.81276	-0.420813	-1.07536	-0.903942	-1.06113	-0.761635
WIPI2	B3KMZ0;A0A024R823;Q9Y4P8	WD repeat domain phosphoinositide-interacting protein 2	NaN	NaN	NaN	NaN	NaN	NaN	NaN	NaN	NaN	NaN	NaN	NaN	NaN	NaN	NaN	NaN	NaN	NaN	NaN	NaN	NaN	NaN	NaN	NaN	NaN	NaN	NaN	NaN	0.368183	NaN	NaN	1.84477	NaN	NaN	NaN	NaN	NaN	NaN	NaN	NaN	NaN	NaN	NaN	NaN	NaN	NaN
HEL-S-167mP;CA3	B4DUJ3;B4DUJ8;V9HWA3;A0A024R825;P07451;E5RHI4	Carbonic anhydrase 3	NaN	NaN	NaN	NaN	NaN	NaN	NaN	NaN	NaN	NaN	NaN	NaN	NaN	NaN	3.61435	NaN	NaN	NaN	NaN	NaN	NaN	NaN	NaN	NaN	NaN	NaN	NaN	NaN	NaN	NaN	NaN	NaN	NaN	NaN	NaN	NaN	NaN	NaN	NaN	NaN	NaN	NaN	NaN	NaN	NaN	NaN
IMPA1	A0A024R830;A0A140VJL8;P29218;E5RIP7;H0YBL1;E5RG13;E5RI82;E5RGY4	Inositol monophosphatase 1	0.189055	0.349763	-0.846634	0.943556	1.13932	0.742583	1.82446	0.192786	0.440174	0.230922	0.384956	0.611663	0.418862	0.82044	0.327097	-0.244646	0.430601	0.189085	0.399326	-0.136772	0.308861	0.773676	-0.305466	0.0179773	-0.253768	-0.298693	0.378347	-0.125429	-0.119005	-0.381144	-0.314021	0.0313156	-0.0870791	0.0635188	-0.372533	-0.609998	0.647016	-0.246418	0.220645	-0.182032	-0.203449	-0.214714	-0.832888	-0.667505	-0.479501	-0.0167783
CDC26	A0A024R832;Q8NHZ8	Anaphase-promoting complex subunit CDC26	NaN	NaN	NaN	NaN	NaN	NaN	NaN	NaN	NaN	NaN	NaN	NaN	NaN	NaN	NaN	NaN	NaN	NaN	NaN	NaN	NaN	NaN	NaN	NaN	NaN	NaN	NaN	NaN	NaN	NaN	NaN	NaN	NaN	NaN	NaN	NaN	NaN	NaN	NaN	NaN	NaN	NaN	NaN	NaN	NaN	NaN
MGC11257;C7orf50	A0A024R836;C9JQV0;Q9BRJ6	Uncharacterized protein C7orf50	NaN	NaN	NaN	NaN	NaN	NaN	NaN	NaN	NaN	NaN	NaN	NaN	NaN	NaN	NaN	NaN	NaN	NaN	NaN	NaN	NaN	NaN	NaN	NaN	NaN	NaN	NaN	NaN	NaN	NaN	NaN	NaN	NaN	NaN	NaN	NaN	NaN	NaN	NaN	NaN	NaN	NaN	NaN	NaN	NaN	NaN
HDHD3	B3KUF6;A0A024R837;Q9BSH5	Haloacid dehalogenase-like hydrolase domain-containing protein 3	-0.82073	0.126326	NaN	-0.672022	0.069884	-0.15562	NaN	-0.236584	0.842384	NaN	-0.109828	2.26354	-0.0798389	0.699513	-0.195483	-1.42948	0.640732	-0.78308	-0.873262	-1.04628	NaN	NaN	-0.356933	-1.10024	NaN	-1.14542	0.496001	NaN	1.08167	NaN	NaN	-0.241596	0.435417	NaN	0.0721946	0.56781	NaN	0.312778	0.16133	-0.873752	-0.809332	NaN	-0.433173	-0.708584	NaN	-0.84149
TRIM32	A0A024R843;Q13049;Q5JVY0	E3 ubiquitin-protein ligase TRIM32	NaN	NaN	NaN	NaN	NaN	NaN	NaN	NaN	NaN	NaN	NaN	NaN	-0.0950467	NaN	NaN	NaN	NaN	NaN	NaN	NaN	NaN	NaN	NaN	NaN	NaN	NaN	NaN	NaN	NaN	NaN	NaN	NaN	NaN	NaN	NaN	NaN	NaN	NaN	NaN	NaN	NaN	NaN	NaN	NaN	NaN	NaN
RAB14	A0A024R845;P61106;X6RFL8	Ras-related protein Rab-14	0.257617	0.691627	-1.34038	-0.158013	0.544398	-0.537162	-1.16591	NaN	-0.634714	-0.449442	0.396174	-0.455878	0.259637	0.354322	0.188976	-0.371589	0.567107	0.187192	0.514659	-1.03966	-0.698663	0.0539495	0.160566	0.268569	-0.811757	-0.230512	-0.424183	-0.791199	-0.783831	-0.872228	-1.08652	-0.138941	0.217343	0.109875	-0.184819	-1.27435	-0.0831608	-0.621575	0.283523	-1.02062	-0.457444	-0.0203899	-1.96127	NaN	-0.940129	-0.66724
MRRF	A0A024R850;Q96E11;X6RDS5;A0A024R855	Ribosome-recycling factor, mitochondrial	NaN	0.235127	0.622088	NaN	0.91997	-0.00676469	NaN	NaN	NaN	NaN	-0.150949	0.733316	1.36155	0.70228	NaN	-0.0436245	NaN	NaN	0.148833	0.969311	NaN	-0.00547193	0.615583	NaN	NaN	0.217688	0.857966	NaN	-0.33308	NaN	NaN	-0.422556	NaN	NaN	1.24393	NaN	NaN	NaN	0.557667	NaN	NaN	NaN	NaN	NaN	NaN	NaN
PPP6C	A0A024R861;O00743	Serine/threonine-protein phosphatase;Serine/threonine-protein phosphatase 6 catalytic subunit;Serine/threonine-protein phosphatase 6 catalytic subunit, N-terminally processed	0.789362	-0.786011	1.08724	-0.588613	-0.0358564	NaN	-0.753519	-0.915483	-0.514851	-0.706219	0.792768	-1.0297	-0.358493	-0.818114	1.08427	-0.791522	NaN	-0.735176	-0.38405	-0.349406	NaN	NaN	-0.240009	-0.0682891	0.65574	-0.489132	0.302191	NaN	-0.522156	-0.498353	0.480116	-0.0312541	0.391246	NaN	-0.671565	NaN	0.0209498	-0.788853	-0.380339	NaN	0.311667	NaN	-0.889283	NaN	0.0956839	NaN
GAPVD1	A0A024R862;A0A024R8A2;Q14C86;F8W9S7;A0A024R875;B3KN67;C9IZ08;B4DK42	GTPase-activating protein and VPS9 domain-containing protein 1	-0.134615	3.24551	NaN	NaN	2.30107	NaN	0.0638359	NaN	1.50525	1.38396	-0.188614	2.31287	-0.506602	NaN	0.74159	NaN	NaN	NaN	NaN	-0.57052	NaN	NaN	0.580116	0.0260141	-0.515107	-0.94028	NaN	NaN	-0.62798	-1.09478	0.575049	-0.385928	1.38926	0.291204	NaN	-1.83232	NaN	NaN	0.600534	NaN	NaN	NaN	NaN	NaN	NaN	NaN
ANGPTL2	B2R780;A0A024R868;Q9UKU9	Angiopoietin-related protein 2	NaN	NaN	NaN	NaN	NaN	NaN	NaN	NaN	NaN	NaN	NaN	NaN	NaN	NaN	NaN	NaN	NaN	NaN	NaN	NaN	NaN	NaN	NaN	NaN	NaN	NaN	NaN	NaN	NaN	NaN	NaN	NaN	NaN	NaN	NaN	NaN	NaN	NaN	NaN	NaN	NaN	NaN	NaN	NaN	NaN	NaN
LRSAM1	A0A024R870;Q6UWE0	E3 ubiquitin-protein ligase LRSAM1	NaN	1.81401	NaN	NaN	NaN	NaN	NaN	NaN	NaN	NaN	NaN	NaN	NaN	NaN	NaN	NaN	NaN	NaN	NaN	NaN	NaN	NaN	1.25611	NaN	2.4027	NaN	NaN	NaN	NaN	NaN	-0.883152	NaN	NaN	NaN	NaN	NaN	NaN	NaN	NaN	NaN	NaN	NaN	NaN	NaN	NaN	NaN
C9orf88;FAM129B	A0A024R872;Q96TA1;Q9H8K1	Niban-like protein 1	NaN	NaN	NaN	NaN	NaN	NaN	NaN	NaN	NaN	NaN	NaN	NaN	NaN	NaN	NaN	NaN	NaN	NaN	NaN	NaN	NaN	NaN	NaN	NaN	NaN	NaN	1.86623	NaN	1.06434	NaN	NaN	NaN	NaN	NaN	NaN	NaN	NaN	NaN	NaN	NaN	NaN	NaN	NaN	NaN	NaN	NaN
ALAD	B7Z3I9;A0A140VJL9;A0A024R877;Q6ZMU0;P13716;B7ZBK6	Delta-aminolevulinic acid dehydratase	0.557389	0.706771	NaN	NaN	NaN	NaN	NaN	0.433418	1.3229	0.870928	1.18189	-0.381505	0.972254	0.650159	0.694041	NaN	NaN	1.50204	0.660657	1.69353	NaN	0.741276	0.932416	1.18882	0.802552	0.824934	0.555927	0.50505	NaN	0.7931	0.442164	0.265639	NaN	1.35542	0.950341	0.77053	1.2785	1.60034	0.716218	0.314631	0.456326	0.319694	0.754483	0.754796	1.38353	0.771548
ENG	Q5T9B9;Q96CG0;A8K2X4;A0A024R878;P17813;B4DYI8;F5GX88;B7Z6Y5	Endoglin	NaN	NaN	NaN	NaN	NaN	NaN	NaN	NaN	NaN	NaN	NaN	NaN	NaN	NaN	NaN	NaN	NaN	NaN	NaN	NaN	NaN	NaN	NaN	NaN	NaN	NaN	NaN	NaN	NaN	NaN	NaN	NaN	NaN	NaN	NaN	NaN	NaN	NaN	NaN	NaN	NaN	NaN	NaN	NaN	NaN	NaN
CDK9	B5BU53;B2R9L6;A0A024R880;P50750	Cyclin-dependent kinase 9	NaN	0.181955	NaN	1.4221	NaN	0.799355	0.701975	0.207394	NaN	NaN	0.382683	NaN	NaN	NaN	1.50267	-0.671656	NaN	-1.03759	0.572941	-0.0909888	NaN	NaN	0.503377	0.830178	-0.351063	-0.425459	1.07464	NaN	NaN	-0.885106	0.707077	0.365388	NaN	NaN	NaN	NaN	0.148193	NaN	NaN	NaN	NaN	NaN	NaN	NaN	NaN	-0.323543
STOM	A0A024R882;P27105;B4E2V5;B4DZK8	Erythrocyte band 7 integral membrane protein	0.110182	-0.248769	-0.16809	-0.214505	0.191449	NaN	-0.541227	-0.100305	0.00463989	0.123196	-0.246548	-0.201437	0.0385375	-0.123725	-0.34787	0.0255447	0.590327	-0.547873	2.0517	-0.484225	0.0722703	0.553697	-0.87338	0.221099	0.928061	0.663715	0.881628	0.181343	0.398597	0.409345	0.157245	0.464398	0.109682	0.810939	0.528863	0.24381	0.833161	0.496481	0.100026	-0.050052	0.526862	0.525653	-0.129433	0.198576	NaN	1.12553
ATP6V1G1;ATP6V1G2-DDX39B;ATP6V1G2	A0A024R883;O75348;F2Z307;O95670	V-type proton ATPase subunit G 1;V-type proton ATPase subunit G 2	NaN	NaN	NaN	NaN	NaN	NaN	NaN	NaN	NaN	NaN	NaN	NaN	0.426625	NaN	NaN	NaN	NaN	1.07015	NaN	NaN	NaN	NaN	NaN	NaN	NaN	NaN	-0.329755	NaN	1.75001	NaN	NaN	NaN	NaN	NaN	NaN	NaN	NaN	NaN	-1.53501	NaN	NaN	NaN	NaN	NaN	NaN	NaN
TNC;TNC variant protein	A0A024R884;Q4LE33		2.90649	1.88087	NaN	1.75292	1.99482	1.93998	NaN	1.37681	NaN	NaN	2.14293	NaN	NaN	NaN	1.0113	1.19004	NaN	1.42237	3.31132	1.55292	NaN	NaN	1.73714	NaN	1.45291	NaN	NaN	NaN	NaN	NaN	1.57209	1.23511	0.992188	NaN	1.35369	NaN	2.29449	1.49762	1.34373	NaN	1.86436	2.74158	NaN	NaN	2.0807	NaN
SET;SETSIP	A0A0C4DFV9;B2RCX0;A0A024R895;Q5VXV3;Q01105;A0A087X027;P0DME0	Protein SET;Protein SETSIP	-0.101235	-0.721591	-0.242816	-0.618449	-0.807837	-0.718891	-0.214747	-1.043	-0.8234	-0.58479	-0.372745	0.349734	-0.983286	0.0939253	-0.924142	-0.566046	-0.257119	-0.710954	-0.0211778	-0.364124	-0.575852	-0.719308	-1.43507	-0.983518	-0.89063	-1.18311	-0.794655	-0.818712	-0.924813	-0.519671	-0.600172	-0.853979	-0.788602	-0.701903	-0.265197	-0.94503	0.0755848	-0.364744	-0.304277	-0.710261	-0.761843	-0.747362	-1.1532	-0.429964	-0.819341	-0.585243
SH3GLB2	A0A024R896;B7ZC38;Q9NR46;B7ZC39;F8WFB9	Endophilin-B2	NaN	NaN	NaN	NaN	NaN	NaN	NaN	NaN	NaN	NaN	NaN	-0.309642	NaN	NaN	NaN	NaN	NaN	0.386302	-0.585828	NaN	NaN	NaN	1.28761	-0.0646434	NaN	NaN	-1.57371	NaN	-0.858777	NaN	0.416712	NaN	-0.512659	NaN	NaN	NaN	NaN	NaN	NaN	NaN	-1.12347	NaN	NaN	NaN	NaN	NaN
ARPC5L	B3KPC7;A0A024R897;Q9BPX5	Actin-related protein 2/3 complex subunit 5;Actin-related protein 2/3 complex subunit 5-like protein	-0.884637	NaN	NaN	NaN	NaN	-1.70635	-0.34005	-0.922226	NaN	NaN	NaN	-0.863621	NaN	NaN	NaN	NaN	NaN	NaN	-1.23762	-1.96437	NaN	NaN	NaN	NaN	NaN	-1.60431	NaN	-2.13777	-1.24629	NaN	-1.69896	NaN	NaN	-1.68733	NaN	NaN	NaN	NaN	NaN	-1.89006	-1.18021	-1.23484	-1.33905	NaN	NaN	NaN
hCG_31253;FUBP3	A0A024R8A7;Q96I24	Far upstream element-binding protein 3	0.3849	0.631236	NaN	0.588044	-0.854703	1.00443	1.33272	-0.883157	1.34027	-0.569856	-0.240027	0.611248	0.384696	2.12375	0.845574	0.107962	-0.365527	-0.44252	-0.204724	0.825287	0.0631077	-0.030927	0.132733	0.374884	-1.54265	1.2929	-0.130013	-0.0329472	0.657696	-0.944386	0.367738	-0.668957	-0.605777	0.528979	-0.890506	0.578109	4.5057	0.0288372	0.320257	0.343939	-0.467403	-0.468218	NaN	NaN	0.877102	NaN
TBC1D13	A0A024R8B1;A0A024R8C8;Q9NVG8;B4DHM6;Q59F95	TBC1 domain family member 13	NaN	NaN	NaN	NaN	NaN	NaN	NaN	NaN	NaN	NaN	NaN	NaN	NaN	NaN	NaN	NaN	NaN	NaN	NaN	NaN	NaN	NaN	NaN	NaN	NaN	NaN	NaN	NaN	NaN	NaN	NaN	NaN	NaN	NaN	NaN	NaN	NaN	NaN	NaN	NaN	NaN	NaN	NaN	NaN	NaN	NaN
FREQ;NCS1	A0A024R8B2;P62166	Neuronal calcium sensor 1	NaN	NaN	NaN	NaN	NaN	NaN	NaN	NaN	NaN	NaN	NaN	NaN	NaN	NaN	NaN	NaN	NaN	NaN	NaN	NaN	NaN	NaN	NaN	NaN	NaN	NaN	NaN	NaN	NaN	NaN	NaN	NaN	NaN	NaN	NaN	NaN	NaN	NaN	NaN	NaN	NaN	NaN	NaN	NaN	NaN	NaN
NUP214;DKFZp686J0330	A0A024R8B6;P35658;Q7Z3C4;A0A0A0MSW3	Nuclear pore complex protein Nup214	NaN	NaN	NaN	NaN	NaN	NaN	NaN	NaN	NaN	NaN	NaN	NaN	NaN	NaN	NaN	NaN	NaN	NaN	NaN	NaN	NaN	NaN	NaN	NaN	NaN	NaN	NaN	NaN	NaN	NaN	NaN	NaN	NaN	NaN	NaN	-0.631069	NaN	NaN	NaN	NaN	-0.547055	NaN	NaN	NaN	NaN	NaN
MRPS2	A0A024R8D4;Q9Y399;Q5T8A0	28S ribosomal protein S2, mitochondrial	NaN	-0.121015	-0.594622	NaN	NaN	NaN	-0.824401	-0.944709	NaN	NaN	0.360074	NaN	-0.384934	NaN	NaN	NaN	NaN	NaN	0.762706	-0.338911	NaN	NaN	NaN	1.12623	NaN	-0.164014	NaN	NaN	NaN	-1.05617	NaN	NaN	NaN	NaN	NaN	NaN	NaN	NaN	NaN	-1.24914	-0.737911	-0.461189	-0.644871	NaN	NaN	NaN
C9orf32;NTMT1	A0A024R8E4;Q9BV86;S4R338	N-terminal Xaa-Pro-Lys N-methyltransferase 1;N-terminal Xaa-Pro-Lys N-methyltransferase 1, N-terminally processed	NaN	NaN	0.0338797	NaN	NaN	-0.861638	NaN	NaN	NaN	NaN	NaN	NaN	NaN	NaN	NaN	NaN	NaN	NaN	NaN	NaN	NaN	NaN	NaN	NaN	NaN	NaN	NaN	NaN	NaN	NaN	NaN	NaN	NaN	NaN	NaN	NaN	NaN	NaN	NaN	NaN	NaN	NaN	NaN	NaN	NaN	NaN
COL5A1	B2ZZ86;A0A087WXW9;A0A024R8E5;P20908;Q59EE7	Collagen alpha-1(V) chain	NaN	NaN	NaN	NaN	NaN	NaN	NaN	NaN	NaN	NaN	NaN	NaN	NaN	NaN	NaN	NaN	NaN	NaN	NaN	NaN	NaN	NaN	NaN	NaN	NaN	NaN	NaN	NaN	NaN	NaN	NaN	NaN	NaN	NaN	NaN	NaN	NaN	NaN	NaN	NaN	NaN	3.96743	NaN	NaN	NaN	NaN
EGFL7	A0A024R8F5;Q9UHF1	Epidermal growth factor-like protein 7	NaN	NaN	NaN	NaN	NaN	NaN	NaN	NaN	NaN	NaN	NaN	NaN	NaN	NaN	NaN	NaN	NaN	NaN	NaN	NaN	NaN	NaN	NaN	NaN	NaN	NaN	NaN	NaN	NaN	NaN	NaN	NaN	NaN	NaN	NaN	NaN	NaN	NaN	NaN	NaN	NaN	NaN	NaN	NaN	NaN	NaN
BRD3	B4DS09;A0A024R8H6;Q15059	Bromodomain-containing protein 3	NaN	NaN	NaN	NaN	NaN	NaN	NaN	NaN	NaN	NaN	NaN	NaN	NaN	NaN	NaN	NaN	NaN	NaN	NaN	NaN	NaN	NaN	NaN	NaN	NaN	NaN	NaN	NaN	NaN	NaN	NaN	NaN	NaN	NaN	NaN	NaN	NaN	NaN	NaN	NaN	NaN	NaN	NaN	NaN	NaN	NaN
MRPS7	A0A024R8L0;J3QLS3;Q9Y2R9;J3QQS1;J3QKW2;J3KSI8	28S ribosomal protein S7, mitochondrial	-0.429011	-0.453141	-0.0451634	0.289334	0.753361	0.0540178	0.0668457	-0.136171	-0.295958	NaN	-1.1173	0.465363	-0.980976	0.35428	NaN	-0.741038	NaN	0.265505	-0.543254	-0.0993626	0.379422	0.916916	-1.41451	1.20862	NaN	-0.15435	0.324032	-0.364749	NaN	0.142099	NaN	NaN	NaN	-0.741834	NaN	-0.218843	1.0399	-0.796382	-0.272586	-0.155201	-0.383732	-1.18571	-1.04159	NaN	-0.632547	-0.573278
WBP2	K7EIN1;K7ESN4;K7EIJ0;K7ENL2;A6NG10;K7EMC9;A0A024R8L1;Q969T9;K7EIK1;B4DFG2;Q7Z511	WW domain-binding protein 2	NaN	NaN	NaN	NaN	NaN	NaN	NaN	NaN	NaN	NaN	NaN	NaN	NaN	NaN	NaN	NaN	NaN	NaN	NaN	NaN	NaN	NaN	-0.360474	NaN	NaN	NaN	NaN	NaN	NaN	NaN	NaN	NaN	NaN	NaN	NaN	NaN	NaN	NaN	NaN	-1.20214	NaN	NaN	NaN	NaN	NaN	NaN
ACOX1	A0A024R8T3;A0A024R8L7;Q15067;K7ELT1;I3L0T4;B4DU07	Acyl-coenzyme A oxidase;Peroxisomal acyl-coenzyme A oxidase 1	NaN	NaN	NaN	NaN	NaN	NaN	NaN	NaN	NaN	NaN	NaN	NaN	-0.153027	NaN	NaN	NaN	NaN	NaN	NaN	NaN	NaN	NaN	NaN	NaN	NaN	NaN	-0.366812	NaN	NaN	NaN	NaN	NaN	-0.319155	NaN	NaN	NaN	NaN	NaN	NaN	NaN	NaN	NaN	NaN	NaN	NaN	NaN
GNA13	A0A024R8M0;Q14344;B4DWV9	Guanine nucleotide-binding protein subunit alpha-13	NaN	NaN	NaN	NaN	NaN	NaN	NaN	NaN	3.0517	NaN	NaN	NaN	NaN	NaN	NaN	NaN	NaN	NaN	NaN	NaN	NaN	NaN	NaN	NaN	NaN	NaN	NaN	NaN	NaN	NaN	NaN	NaN	NaN	NaN	NaN	NaN	NaN	NaN	NaN	NaN	NaN	NaN	NaN	NaN	NaN	NaN
PRPSAP1	A0A024R8M4;Q14558;B4DP31	Phosphoribosyl pyrophosphate synthase-associated protein 1	-0.136323	NaN	NaN	0.525683	0.586601	0.522986	1.60516	-0.802373	0.431851	-0.35727	0.970667	NaN	0.782596	NaN	NaN	NaN	NaN	-0.766129	-0.920881	0.496936	NaN	NaN	-0.00201561	0.00336538	NaN	-0.656542	0.861867	-1.59746	-0.652601	NaN	-0.434775	NaN	NaN	0.328018	-0.0905825	NaN	NaN	NaN	NaN	NaN	-1.07678	NaN	NaN	NaN	NaN	-0.77349
C17orf80	A0A024R8P4;Q9BSJ5;I3L072;B7Z7E5	Uncharacterized protein C17orf80	NaN	NaN	NaN	NaN	NaN	NaN	NaN	NaN	NaN	NaN	NaN	NaN	NaN	NaN	NaN	NaN	NaN	NaN	NaN	NaN	NaN	NaN	NaN	NaN	NaN	NaN	NaN	NaN	NaN	NaN	NaN	NaN	NaN	NaN	NaN	NaN	NaN	NaN	NaN	NaN	NaN	NaN	NaN	NaN	NaN	NaN
RPL38	A0A024R8P8;P63173;J3KT73;J3QL01	60S ribosomal protein L38	3.26008	NaN	NaN	3.7223	NaN	-0.549521	NaN	NaN	NaN	NaN	NaN	0.12042	NaN	2.98348	NaN	NaN	NaN	NaN	1.46323	NaN	NaN	1.072	NaN	NaN	NaN	NaN	NaN	NaN	NaN	NaN	NaN	NaN	NaN	3.59494	NaN	NaN	NaN	NaN	NaN	-0.251204	NaN	0.433779	0.310146	NaN	NaN	NaN
GAA	A0A024R8Q1;P10253	Lysosomal alpha-glucosidase;76 kDa lysosomal alpha-glucosidase;70 kDa lysosomal alpha-glucosidase	1.2837	2.96611	-0.510226	3.4425	1.86371	1.14595	2.98519	NaN	0.569115	NaN	-0.755374	-0.0723429	1.72045	2.68413	3.8641	2.90174	0.556309	3.02747	1.23604	1.69304	NaN	3.27704	1.53278	1.83444	-0.482585	-0.759453	1.36046	NaN	0.0590479	1.29811	NaN	0.807339	0.664912	4.31112	3.00926	-1.01718	NaN	2.75176	1.07424	0.0638011	-0.246226	NaN	0.552963	NaN	-0.0436245	1.46733
NPLOC4	A0A024R8R4;Q8TAT6;B4DG89	Nuclear protein localization protein 4 homolog	-0.123534	-0.0707797	NaN	0.523984	-0.332425	1.61237	0.926975	0.194361	0.0863541	1.18042	1.22499	0.584068	0.0707983	1.57121	0.189977	0.181752	0.805023	-0.12439	-1.22853	2.40339	NaN	NaN	NaN	0.260048	0.695068	-1.28457	-0.117452	NaN	0.142417	0.493845	NaN	0.320433	NaN	NaN	0.543488	-0.415099	0.296012	NaN	-0.166588	-0.0725345	-1.21002	-0.527371	-1.02125	NaN	0.12647	NaN
FAM195B;hCG_1818442	I3L3A7;I3L2L5;A0A024R8R5;I3L317;I3L4Q0;C9JLW8	Protein FAM195B	NaN	NaN	NaN	NaN	NaN	NaN	NaN	NaN	NaN	NaN	NaN	NaN	NaN	NaN	NaN	NaN	NaN	NaN	NaN	NaN	NaN	NaN	NaN	NaN	NaN	NaN	NaN	NaN	NaN	NaN	NaN	NaN	NaN	NaN	NaN	NaN	NaN	NaN	NaN	NaN	NaN	NaN	NaN	NaN	NaN	NaN
SUMO2	A0A024R8S3;P61956	Small ubiquitin-related modifier;Small ubiquitin-related modifier 2	-0.262912	1.42124	-0.353125	0.808816	-0.750003	-0.236401	-0.187979	-1.4773	-0.366423	-1.21614	-0.891727	0.669156	1.46647	0.157882	0.7054	0.346332	0.76553	1.48962	1.55863	0.409757	-0.267897	-0.814469	0.130157	1.53935	-0.940534	-1.15312	0.0737245	-0.499747	-0.0319458	0.180739	-0.321179	-0.350103	0.174348	0.319027	0.280657	-0.609399	0.757043	-0.27367	0.0565666	0.823787	-0.299362	-1.17889	-2.46094	-1.17331	-1.42625	-0.717759
P4HB	A0A024R8S5;P07237;B4DUA5;H7BZ94;B4DLN6;B4DNL5;H0Y3Z3	Protein disulfide-isomerase	-0.997097	-0.635757	-1.14479	-0.842138	-1.33726	-1.05938	-0.844411	-0.743619	-0.810395	-1.02688	-0.61376	-0.76103	-1.03417	-1.36276	-0.714302	-0.891449	-0.89419	-0.972731	-0.238213	-0.943522	-1.02606	-0.957817	-1.1976	-0.884232	-1.01444	-0.655772	-1.0529	-0.618405	-0.576098	-0.375682	-0.63509	-0.771449	-0.923972	-0.808125	-0.985219	-0.936043	-0.684049	-1.05968	-0.721266	-0.44184	-0.527936	-0.594488	-0.446623	-0.709047	-0.637077	-0.147556
SYNGR2	A0A024R8T9;O43760;K7ELD9;K7ENG9;K7ELS8	Synaptogyrin;Synaptogyrin-2	-1.85376	0.0180159	NaN	NaN	-1.45425	-1.82118	-1.29084	NaN	0.488552	-1.58991	NaN	-0.595283	-1.27697	NaN	NaN	NaN	-0.82855	NaN	NaN	-1.91456	NaN	0.576581	-0.444349	NaN	NaN	-1.07204	-0.870108	-1.88127	NaN	NaN	NaN	-1.24306	NaN	NaN	NaN	-1.45702	NaN	NaN	NaN	-0.778881	-0.351402	-1.14104	NaN	-1.42315	-0.467905	-0.901417
SLC16A3	A0A024R8U1;O15427;Q53G91;J3QQV2;J3QSC3	Monocarboxylate transporter 4	-1.04806	NaN	-0.879627	-1.90084	NaN	-3.04684	-1.52557	-1.15257	-0.987976	-1.39254	-1.27984	-1.43084	-1.31126	-2.89761	-2.34844	-1.77745	-1.44539	-1.80218	-1.37703	-1.30343	-0.681854	NaN	-1.12433	-1.22621	-2.25033	-0.932413	-1.8263	-0.574418	-1.02737	-0.443833	-2.04466	-1.3251	-1.18698	-1.44178	0.112007	-1.68123	-0.862807	-1.36782	-0.337426	-1.54462	-1.24547	-0.603711	-1.43344	-0.458949	NaN	NaN
WDR45L;WDR45B	B4DMI6;A0A024R8U4;Q5MNZ6;I3L1D0;I3L4S6	WD repeat domain phosphoinositide-interacting protein 3	NaN	NaN	NaN	NaN	NaN	NaN	NaN	NaN	NaN	NaN	NaN	NaN	NaN	NaN	NaN	NaN	NaN	NaN	NaN	NaN	NaN	NaN	NaN	NaN	NaN	NaN	NaN	NaN	NaN	NaN	NaN	NaN	NaN	NaN	NaN	NaN	NaN	NaN	NaN	NaN	NaN	1.90493	NaN	NaN	NaN	NaN
SRSF2;SFRS2	J3KP15;Q53FN0;A0A024R8U5;Q01130;J3QL05;B3KUY1;Q8NAK9;B3KX15;Q6NXQ0;Q8N220;B3KVY2;B3KUF7	Serine/arginine-rich splicing factor 2	-0.746999	-1.51733	-0.721281	-1.09796	-0.708979	-1.83005	-0.239573	-0.146655	-0.819341	-0.388385	-1.40416	-0.884569	-0.91488	-0.979461	-1.11165	-1.13036	-0.548869	-0.881893	-0.686254	-0.823611	-0.964731	-0.517839	-0.938093	-0.87808	-0.609699	-0.743718	-0.577048	-0.747925	-0.394862	-0.767237	-0.847917	-0.893572	-1.0662	-0.848792	-1.44431	-0.978521	-0.257874	-0.740039	-0.577374	-0.090857	-1.60089	0.42879	-0.817504	-0.927138	0.898215	-0.906735
PYCR1;PIG45	E7D7X9;A0A024R8U9;P32322;E2QRB3;E7D7Y0;A0A1B2JLU7;B7Z8T1;J3KQ22;Q2TU78;J3QKT4;Q8TBX0;J3QL24	Pyrroline-5-carboxylate reductase;Pyrroline-5-carboxylate reductase 1, mitochondrial	NaN	NaN	NaN	1.32731	NaN	NaN	NaN	NaN	NaN	NaN	NaN	NaN	NaN	NaN	NaN	NaN	NaN	NaN	NaN	-0.772392	NaN	NaN	NaN	NaN	NaN	0.373122	NaN	NaN	0.251109	NaN	NaN	NaN	NaN	NaN	NaN	NaN	NaN	NaN	NaN	NaN	-0.324933	NaN	-0.931947	0.0942024	NaN	NaN
2018-09-09	A0A0S2Z5A5;A0A024R8V0;Q9UHD8;A0A024R8Q0;A0A0S2Z5W9	Septin-9	-0.0432264	0.40059	-1.14867	-1.13389	0.243365	-1.49805	-0.596504	-0.935904	0.172492	-0.454702	-0.791487	0.12916	0.278318	-0.609036	-1.05116	-1.07997	-0.284399	-0.0965331	-0.775221	-0.676252	-0.824719	-0.23602	-0.296218	-0.605308	-1.26891	-1.23163	0.285521	-1.42857	-0.348105	-0.770183	-0.793909	-0.183884	0.0462224	-1.11944	-0.432351	-1.73073	-0.232415	-1.42841	-0.258158	-1.21726	-0.692083	-0.669546	-1.55491	-1.2148	-1.80607	-0.741258
hCG_1642326;PGS1	B4DL81;A0A024R8V5;Q32NB8;K7EQF5;U3KQD9;K7EL44;B4DLU3	CDP-diacylglycerol--glycerol-3-phosphate 3-phosphatidyltransferase, mitochondrial	NaN	NaN	NaN	NaN	NaN	NaN	NaN	NaN	NaN	NaN	NaN	NaN	NaN	NaN	NaN	NaN	NaN	NaN	NaN	NaN	NaN	NaN	NaN	NaN	NaN	NaN	NaN	NaN	NaN	NaN	NaN	NaN	NaN	NaN	NaN	NaN	NaN	NaN	NaN	NaN	NaN	NaN	NaN	NaN	NaN	NaN
DDX48;EIF4A3	A0A024R8W0;P38919	Eukaryotic initiation factor 4A-III;Eukaryotic initiation factor 4A-III, N-terminally processed	-0.160517	-0.537617	-0.782706	-0.650489	-0.306737	0.0812645	-0.308729	-0.0839821	-0.309721	-0.63993	-0.361652	-0.151148	-0.0356897	0.277275	0.306291	-0.403337	0.0712321	-1.12264	-0.693608	-1.03783	-1.20992	-0.442336	-1.03568	-0.411154	-0.958503	-0.831295	-0.524549	-0.513822	-0.81739	-0.568989	-0.920563	-0.51838	-0.336358	-0.665416	-0.111545	-0.655683	0.358252	-1.0081	-1.08889	-0.96186	-0.432747	-0.995619	-1.30064	-0.989024	-0.465011	0.524861
C17orf62	J3QRZ2;J3QLB7;J3QKS6;J3QRG5;A0A024R8W9;J3KSJ5;Q9BQA9;J3QKZ6;J3KTI1;J3KSB6;J3KS78;J3QS53;J3KTF4	Uncharacterized protein C17orf62	NaN	NaN	NaN	NaN	NaN	NaN	NaN	NaN	NaN	NaN	NaN	NaN	NaN	NaN	NaN	NaN	NaN	NaN	NaN	NaN	NaN	NaN	NaN	NaN	NaN	NaN	NaN	NaN	NaN	NaN	NaN	NaN	NaN	NaN	NaN	NaN	NaN	NaN	NaN	NaN	NaN	NaN	NaN	NaN	NaN	NaN
POU2F1	A0A0C4DG88;B3KRE9;A0A0P0GE07;A0A024R8Y2;P14859	POU domain protein;POU domain, class 2, transcription factor 1	NaN	NaN	NaN	NaN	NaN	NaN	NaN	NaN	NaN	NaN	NaN	NaN	NaN	NaN	NaN	NaN	NaN	NaN	NaN	NaN	NaN	NaN	NaN	NaN	NaN	NaN	NaN	NaN	NaN	NaN	NaN	NaN	NaN	NaN	NaN	NaN	NaN	NaN	NaN	NaN	NaN	NaN	NaN	NaN	NaN	NaN
MGST3	Q53GB9;A0A024R8Z1;Q5VV89;O14880;Q5VV87	Microsomal glutathione S-transferase 3	-1.09477	-1.63845	-2.06293	-1.16278	-1.448	NaN	-0.290965	-2.03567	-1.62658	-0.589238	-1.16208	-0.958231	-0.539202	-2.08149	-0.71563	-1.39255	-0.116073	-1.17919	-1.09898	-0.637482	-1.88966	-0.880443	-1.91375	-1.43544	-1.53656	-1.28225	-0.288181	-2.09632	-0.393112	-1.72698	-0.571341	-1.35872	-2.20898	-1.37971	-0.128953	-1.8829	NaN	-1.1687	-0.97475	-1.27178	-0.709549	-0.645527	-1.33152	-1.59133	-2.3504	-2.3922
MPC2;BRP44	Q5R3B4;B2R4Q7;A0A024R8Z5;O95563	Mitochondrial pyruvate carrier 2	-0.737472	-0.542605	-0.0789513	-0.894919	NaN	-0.727405	-1.91579	-1.13727	-0.967242	NaN	-1.06959	-1.28185	-0.0522768	-0.950543	NaN	-0.751635	NaN	-0.656335	-1.88713	-0.883552	-0.546518	NaN	-0.641247	-1.1223	-0.176295	-0.430402	NaN	-0.430824	-0.427928	NaN	-0.474292	NaN	NaN	-0.885809	NaN	-0.14496	NaN	NaN	NaN	-0.641176	-1.21946	-1.16002	-0.671656	NaN	NaN	NaN
DARS2	A8K4A8;A0A024R8Z9;Q6PI48;Q9H9J7;Q9NVT8	Aspartate--tRNA ligase, mitochondrial	0.436469	-0.137705	-0.159746	0.19968	-0.411894	-0.116762	0.720113	0.107244	0.332003	0.121321	0.459232	-0.0235659	0.177547	0.250698	0.436555	-0.474595	0.335084	0.151788	0.0239232	-0.0519597	0.725999	0.644534	0.627698	0.643578	-0.536543	-0.473449	-0.784923	-0.0990912	-0.789891	-0.62714	-0.366848	0.136846	-0.114364	-0.324175	0.00630399	-0.27796	NaN	-0.642655	0.219035	-0.474039	0.182367	-0.0175598	0.25226	NaN	-0.653977	-0.0799127
CACYBP	Q6NVY0;A0A024R904;Q9HB71	Calcyclin-binding protein	NaN	NaN	-1.25834	NaN	-4.95345	-2.20527	NaN	NaN	NaN	NaN	NaN	-2.05022	NaN	NaN	NaN	NaN	NaN	NaN	NaN	NaN	NaN	NaN	NaN	NaN	NaN	-1.18536	NaN	NaN	NaN	NaN	NaN	NaN	NaN	NaN	NaN	NaN	NaN	NaN	NaN	NaN	0.384734	1.18403	NaN	NaN	NaN	NaN
XPR1	A0A024R911;Q9UBH6	Xenotropic and polytropic retrovirus receptor 1	NaN	NaN	NaN	NaN	NaN	NaN	NaN	NaN	NaN	NaN	NaN	NaN	NaN	NaN	NaN	NaN	NaN	NaN	-1.11143	NaN	NaN	NaN	NaN	0.709646	NaN	NaN	NaN	NaN	NaN	NaN	NaN	NaN	NaN	NaN	0.717999	NaN	NaN	NaN	NaN	NaN	NaN	NaN	NaN	NaN	NaN	NaN
PBX1	H0YKH1;A0A087X0P4;H0YLF5;A0A0A0MTI0;Q53YC7;A0A024R919;P40424;H0YLD4;H0YLT4;B7Z774;H0YLB0;A8K5V0;F8WA05	Pre-B-cell leukemia transcription factor 1	-0.244156	NaN	NaN	NaN	2.26611	NaN	NaN	NaN	NaN	2.52516	NaN	-0.22367	1.0346	NaN	NaN	NaN	0.531657	-0.174534	1.81665	NaN	NaN	NaN	NaN	NaN	NaN	NaN	0.916453	NaN	NaN	NaN	NaN	1.36583	NaN	NaN	0.340569	NaN	NaN	NaN	NaN	NaN	NaN	NaN	NaN	NaN	NaN	NaN
SERPINC1	A0A024R944;P01008;A0A0K0Q2Z1	Antithrombin-III	NaN	NaN	NaN	NaN	NaN	NaN	NaN	NaN	NaN	NaN	NaN	NaN	NaN	NaN	NaN	NaN	NaN	NaN	NaN	NaN	NaN	NaN	NaN	NaN	NaN	NaN	NaN	NaN	NaN	NaN	NaN	NaN	NaN	NaN	NaN	NaN	NaN	NaN	NaN	NaN	NaN	NaN	NaN	2.79626	NaN	NaN
TOR1AIP2	A0A024R957;Q8NFQ8	Torsin-1A-interacting protein 2	NaN	NaN	NaN	NaN	NaN	NaN	NaN	NaN	NaN	NaN	NaN	NaN	NaN	NaN	NaN	NaN	NaN	NaN	NaN	NaN	NaN	NaN	NaN	NaN	NaN	NaN	NaN	NaN	NaN	NaN	NaN	NaN	NaN	NaN	NaN	NaN	NaN	NaN	NaN	NaN	NaN	NaN	NaN	NaN	NaN	NaN
TNNI1	A0A024R959;B3KW26;A0A087WT47;P19237;G3V489;G3V4F8;G3V3L5	Troponin I, slow skeletal muscle	-2.74479	-3.03874	-2.42969	-2.91255	-2.07677	-3.57428	-3.21959	-3.34167	-2.86208	-3.66044	-3.26358	-2.17281	-2.69168	-2.55586	-3.69316	-2.68634	-3.94621	-4.96457	-3.17379	-4.76712	-4.81375	-4.30878	-3.18689	-3.58336	-3.8138	-2.81416	-1.93373	-3.96116	-2.35162	-2.37042	-3.74855	-2.76435	-2.97687	-2.63969	-2.68731	-3.92027	-1.45506	-3.34081	-2.83912	-4.5821	-3.45012	-2.32271	-3.24025	-2.72975	-2.64176	-2.65811
hCG_40889;CFH;HF	A0A024R962;P08603;A0A024R984;A8K5T0;Q14006	Complement factor H	NaN	NaN	3.38802	NaN	NaN	NaN	NaN	NaN	NaN	NaN	NaN	NaN	NaN	NaN	NaN	NaN	NaN	NaN	NaN	NaN	NaN	NaN	NaN	NaN	NaN	NaN	NaN	NaN	NaN	NaN	NaN	NaN	NaN	NaN	NaN	NaN	NaN	NaN	NaN	NaN	NaN	NaN	NaN	NaN	NaN	NaN
NEK7	B2R8K8;A0A024R964;Q8TDX7	Serine/threonine-protein kinase Nek7	NaN	NaN	NaN	-0.847265	NaN	NaN	NaN	NaN	NaN	NaN	NaN	NaN	0.0173878	-1.29266	-0.917088	NaN	-0.83815	-0.776357	-0.882056	NaN	NaN	NaN	NaN	NaN	NaN	NaN	-1.21145	-0.0213375	NaN	NaN	NaN	-0.771379	NaN	-0.826518	NaN	-0.473319	NaN	NaN	-1.40822	0.683182	NaN	0.176025	NaN	NaN	NaN	NaN
LAMC1	A0A024R972;P11047	Laminin subunit gamma-1	0.923185	0.129636	0.534636	1.1342	0.614283	1.0064	1.02412	1.2768	1.08385	0.985871	1.55754	1.15786	1.04483	0.970022	1.1715	0.741881	0.441273	1.1774	0.876783	0.519781	0.956354	0.943474	0.88582	0.95761	1.10536	1.30669	1.38282	1.21521	0.640817	0.782527	0.869163	1.18086	1.10726	0.370575	1.1267	0.466056	0.860812	0.30701	0.813367	0.722084	0.410206	0.485596	0.512243	0.89125	0.0236579	0.357451
C1orf27;ODR4	A0A024R973;Q5SWX8	Protein odr-4 homolog	NaN	NaN	NaN	NaN	NaN	NaN	NaN	NaN	-0.326422	NaN	NaN	NaN	NaN	NaN	NaN	NaN	NaN	NaN	NaN	NaN	NaN	NaN	NaN	NaN	NaN	NaN	NaN	NaN	NaN	NaN	NaN	NaN	-0.708849	NaN	NaN	NaN	NaN	NaN	NaN	NaN	NaN	NaN	NaN	NaN	NaN	NaN
ARL8A	B2R7U5;A0A024R977;Q96BM9	ADP-ribosylation factor-like protein 8A	-0.475031	-0.0646224	-1.16801	-0.20989	-1.41467	0.471769	1.23267	0.243604	-0.762051	0.253326	0.671638	0.747897	0.167719	0.71897	NaN	0.135472	0.674959	0.109466	-0.541119	0.398587	-0.303833	0.736746	0.512708	-0.202136	-0.256725	-1.26745	0.803583	-0.874325	0.707996	0.0580223	NaN	-0.171795	-0.751391	NaN	-0.14952	-0.651298	0.460708	-1.06516	0.792823	NaN	NaN	NaN	-0.893983	-0.709322	-1.37533	NaN
C1orf24;FAM129A	A0A024R978;Q9BZQ8	Protein Niban	NaN	NaN	0.250068	NaN	NaN	0.0529698	NaN	NaN	NaN	NaN	0.0732855	NaN	1.13153	NaN	NaN	NaN	NaN	NaN	NaN	1.4547	NaN	NaN	NaN	NaN	NaN	-0.139339	0.564801	0.415307	NaN	0.485317	NaN	0.727819	NaN	NaN	NaN	NaN	NaN	NaN	NaN	NaN	1.55125	1.59401	2.17495	NaN	NaN	NaN
PCTK3;CDK18	A0A024R996;A0A024R980;Q07002	Cyclin-dependent kinase 18	NaN	NaN	NaN	NaN	NaN	NaN	NaN	NaN	NaN	NaN	NaN	NaN	NaN	NaN	NaN	NaN	NaN	NaN	NaN	NaN	NaN	NaN	NaN	NaN	NaN	NaN	NaN	NaN	NaN	NaN	1.28778	NaN	NaN	NaN	NaN	NaN	NaN	NaN	NaN	NaN	NaN	NaN	NaN	NaN	NaN	NaN
TROVE2	A0A024R983;P10155;B3KN94	60 kDa SS-A/Ro ribonucleoprotein	NaN	NaN	-0.667756	NaN	NaN	0.043527	0.775639	-0.547508	NaN	NaN	-0.369799	NaN	NaN	NaN	NaN	-1.68657	NaN	-0.614097	-1.3602	-0.419071	-0.833497	0.165855	-0.493303	-1.40108	NaN	-1.56681	-0.753605	-1.923	-2.10246	NaN	NaN	NaN	-1.62723	NaN	-1.30596	1.4412	NaN	NaN	0.871179	-2.40741	-1.7205	-0.547845	-1.83544	-1.59029	NaN	NaN
CPNE3	A0A024R994;O75131;Q05DL8;A0A087WYQ3;E5RHZ0	Copine-3	0.59888	0.300711	0.516776	2.28819	0.485507	0.996954	0.372409	0.465885	0.0259744	0.377025	0.820167	0.292168	-0.0191317	0.550823	-0.00994509	0.93099	0.0438651	0.523864	0.481522	-0.134811	0.356604	1.00714	-0.489343	0.503642	0.868154	0.871238	0.81539	0.45023	0.959546	-0.680166	0.198028	0.00129192	1.14138	0.525942	0.228675	0.188786	0.584977	0.738306	0.705642	0.148723	-0.295167	-0.594076	-0.49439	0.0479987	0.288254	-0.0698867
COX6C	A0A024R9B7;P09669	Cytochrome c oxidase subunit 6C	-1.42686	-0.949007	-0.836106	-1.57641	-0.62249	-0.61759	-1.0281	-0.615178	-0.066179	-0.712094	0.063301	-0.535435	-0.17614	-1.78498	-1.34216	0.134841	-2.01498	-0.414285	0.141223	-0.507532	0.212577	-0.0603242	0.509528	0.10479	0.886706	0.801594	0.117459	0.312318	0.117236	0.00102489	0.200978	-0.068094	0.832865	0.0331639	0.987299	0.387622	0.494556	0.704022	0.941599	0.887243	0.982997	0.804011	0.41595	1.66916	0.708581	0.0526757
PGCP;CPQ	A0A024R9B8;Q9Y646;B4E1W2;E5RH35;E5RJZ7;E5RJP8;E5RJA8;B4DJC2	Carboxypeptidase Q	NaN	NaN	NaN	NaN	NaN	NaN	NaN	NaN	NaN	NaN	NaN	NaN	NaN	NaN	NaN	NaN	NaN	NaN	0.655058	NaN	NaN	NaN	NaN	NaN	NaN	NaN	NaN	NaN	NaN	NaN	NaN	NaN	NaN	-0.0873271	NaN	NaN	NaN	NaN	NaN	NaN	0.594552	NaN	NaN	NaN	NaN	NaN
MATN2	A0A024R9B9;A0A024R9H1		-0.0893387	0.0757083	-0.159691	0.429709	0.278432	-0.152692	0.62531	-0.0942853	-0.518613	0.382077	0.0789249	0.513637	-0.0550238	-0.137757	0.58697	-0.407417	0.899548	-0.270683	-0.242191	0.0236245	-0.095362	0.963863	-0.270759	-0.260304	-0.984741	-0.663703	0.362288	-1.71545	0.178862	-0.0101235	0.217808	-0.171955	0.458776	-0.425141	0.188842	-0.922972	0.621397	0.0172113	0.701708	-0.461108	-0.688976	-0.0781722	-1.38623	-0.43383	-0.794715	-0.293166
PPM2C;PDP1	B3KPZ7;A0A024R9C0;B4DYX8;Q6P1N1;Q9P0J1	[Pyruvate dehydrogenase [acetyl-transferring]]-phosphatase 1, mitochondrial	-2.09221	0.300631	-0.394295	NaN	0.979857	NaN	NaN	-0.421371	3.17033	NaN	0.326366	-0.612871	0.184016	NaN	1.09077	-0.344829	NaN	0.598457	0.029561	0.361122	NaN	NaN	-0.602647	1.04493	NaN	-0.0109229	0.0935249	1.94514	1.50271	-0.621618	-0.720928	1.62385	-0.348346	0.514779	-0.00647763	0.320036	-0.43808	NaN	-0.0382958	0.33867	0.378307	-1.83261	-1.0217	0.656614	NaN	-0.297485
PABPC1;PABPC3	A0A024R9C1;P11940;A0A087WTT1;E7EQV3;B4DZW4;E7ERJ7;B4DQX0;B3KT93;A0A024R9E2;H0YAR2;Q5VX58;Q3ZCS4;Q9H361	Polyadenylate-binding protein;Polyadenylate-binding protein 1;Polyadenylate-binding protein 3	-0.0810741	0.219107	-0.530781	-0.0619121	-0.121633	-0.648759	0.54059	-0.853442	-0.294169	-0.0691485	-0.650402	0.160176	-0.949985	-0.584052	-0.580913	-0.466412	-0.418394	-0.719818	-0.266588	-0.35044	-0.925454	-0.216372	-0.740269	-0.87203	-0.621742	-1.13692	-0.129996	-0.931115	-0.662674	-0.599539	-1.33573	-0.752975	-0.545061	-0.769893	-0.615123	-0.954417	-0.58219	-0.950037	-0.648625	-1.52036	-0.574145	-0.581417	-0.36166	-0.56682	-0.780003	-0.659644
MTDH	A0A024R9D2;Q86UE4;E5RJU9	Protein LYRIC	NaN	NaN	NaN	1.54385	1.08752	0.718491	1.15011	NaN	NaN	1.23183	-0.736821	-0.610832	0.281235	0.337692	0.640636	NaN	0.983093	-0.931683	0.0300446	-1.59072	-0.816477	0.267996	-0.178417	-0.361529	-0.375846	-1.2539	-0.519039	-0.95859	-0.404491	0.708514	-0.610322	-0.27521	0.10921	-0.961071	-0.557582	-1.05589	-0.639232	-0.747409	-0.539829	-0.813689	-0.440889	-0.429276	NaN	NaN	-0.576184	NaN
RPL30	E5RI99;A0A024R9D3;P62888	60S ribosomal protein L30	-0.244459	0.0348603	-1.48707	-1.11323	-0.787784	-2.02276	-0.415867	-0.752624	-0.73003	-1.15594	-0.931804	0.288797	-0.311114	-1.00504	-0.908429	-1.19945	-0.714222	-0.506746	-0.246474	-0.706149	-1.5603	NaN	-0.437149	-1.27292	-0.922278	-1.21869	0.683445	-1.56335	0.303795	-1.22783	-0.92426	-1.03285	0.0991354	-1.61403	-0.426114	-1.21324	-0.693357	-1.02924	-0.960786	-1.61976	-1.60251	-0.578039	-1.31417	-0.402847	-0.775817	-0.768627
DECR1	A0A024R9D7;Q16698	2,4-dienoyl-CoA reductase, mitochondrial	-0.50093	0.0144487	-0.643842	-0.472726	-0.171411	-0.676745	-0.56122	-0.684214	-0.196409	-0.583006	-0.00568382	0.156967	0.119064	0.0757512	-0.336324	-0.358377	-0.360235	-0.177112	-0.166157	-0.0753762	-0.370246	-0.745644	-0.323172	0.118003	0.382479	0.716665	0.0482509	0.107065	0.281414	0.0426792	0.280828	0.475083	0.100015	-0.162453	0.125152	0.225766	-0.18728	0.293251	0.203031	0.402452	0.992769	-0.00819563	0.596411	-0.0599793	-0.0696206	0.168548
ENY2	E5RHX8;A0A024R9D9;Q9NPA8	Transcription and mRNA export factor ENY2	NaN	NaN	NaN	NaN	NaN	NaN	NaN	NaN	NaN	NaN	NaN	NaN	NaN	NaN	NaN	NaN	NaN	NaN	NaN	NaN	NaN	NaN	NaN	NaN	NaN	NaN	NaN	NaN	NaN	NaN	NaN	NaN	NaN	NaN	NaN	NaN	NaN	NaN	NaN	NaN	NaN	NaN	NaN	NaN	NaN	NaN
FAM49B;DKFZp686B04128	A0A024R9G4;Q9NUQ9;Q68D08	Protein FAM49B	-1.17678	-0.645794	-2.50947	0.252752	1.41856	-1.32907	0.311559	-0.693439	0.201913	-1.88628	-1.08158	-2.53697	-0.907541	-1.05792	-0.728487	-2.7995	-0.163837	-0.769179	-0.0318143	-1.01879	-0.831841	-1.1705	0.021575	-1.49829	-1.57849	-0.0457481	-0.627561	-0.334588	-1.45453	-1.53358	-0.99361	-0.442774	-0.182347	-1.39826	-2.13389	-1.17823	-1.77492	-1.97404	-1.56618	-1.24017	-1.03058	-1.44872	-0.602742	-1.01892	-0.370722	-1.04133
HRSP12	A0A024R9H2;P52758;H0YBX3;H0YB34	Ribonuclease UK114	NaN	NaN	NaN	NaN	NaN	NaN	NaN	NaN	NaN	NaN	NaN	NaN	1.38417	NaN	NaN	NaN	NaN	NaN	NaN	NaN	NaN	NaN	NaN	NaN	NaN	NaN	NaN	NaN	NaN	NaN	NaN	NaN	NaN	NaN	NaN	NaN	NaN	NaN	NaN	NaN	NaN	NaN	NaN	NaN	NaN	NaN
ATP6V1C1	A0A024R9I0;P21283;E7EV59;B7Z593	V-type proton ATPase subunit C 1	NaN	NaN	NaN	NaN	NaN	NaN	NaN	NaN	NaN	NaN	1.24229	NaN	NaN	NaN	NaN	NaN	NaN	NaN	NaN	NaN	NaN	NaN	NaN	NaN	NaN	NaN	0.867726	NaN	NaN	NaN	NaN	NaN	NaN	NaN	NaN	NaN	NaN	NaN	NaN	NaN	NaN	NaN	NaN	NaN	NaN	NaN
MEIS2;HB103;WUGSC:H_NH0444B04.1;MEIS3;MEIS3P1	U3KQI2;B3KP81;B7Z272;A0A024R9I7;B3KPD8;B7Z6F6;A0A024R9L4;O14770;Q8IZV9;Q8IZZ2;H0YKE5;H0YKN2;U3KQ95;H0YMX5;Q6V703;Q59FK5;H0YMV2;Q8TCW1;A0A024R9J1;A0A024R0S2;A0A024R0W2;H3BLU4;H0YNA8;A6NDR6;Q99687	Homeobox protein Meis2;Putative homeobox protein Meis3-like 1;Homeobox protein Meis3	NaN	NaN	NaN	NaN	NaN	NaN	NaN	NaN	NaN	NaN	NaN	NaN	NaN	NaN	NaN	NaN	NaN	NaN	NaN	NaN	NaN	NaN	NaN	NaN	NaN	NaN	NaN	NaN	NaN	NaN	NaN	NaN	NaN	NaN	NaN	NaN	NaN	NaN	NaN	NaN	NaN	NaN	NaN	NaN	NaN	NaN
RAD21	A0A024R9J0;O60216	Double-strand-break repair protein rad21 homolog	NaN	-0.920293	NaN	NaN	0.0733932	-0.880646	-0.389668	-0.83649	0.496773	NaN	-0.407836	-0.221769	-0.290306	-0.686971	-0.615134	-1.10668	0.227561	0.6173	0.626831	0.769576	-0.123401	NaN	0.996101	0.188109	-1.13993	NaN	0.642932	NaN	NaN	-1.56926	-1.00101	0.0673643	0.667921	-1.71598	-0.24255	NaN	0.322956	-0.519944	NaN	-2.29425	-0.360758	-0.971001	-1.44652	-0.64321	NaN	0.0863389
FYTTD1	A0A024R9K4;Q96QD9;H9KVD1	UAP56-interacting factor	NaN	1.68866	NaN	NaN	-0.720716	NaN	NaN	NaN	2.64413	NaN	NaN	1.96985	NaN	-0.357721	NaN	NaN	0.245728	NaN	NaN	-0.373509	NaN	0.389073	NaN	NaN	NaN	NaN	1.41323	NaN	NaN	NaN	1.56674	NaN	1.3531	NaN	NaN	NaN	NaN	-0.436162	NaN	NaN	NaN	NaN	NaN	NaN	NaN	NaN
C15orf24;EMC7	A0A024R9K7;Q9NPA0;H0YDX2;H0YDT8	ER membrane protein complex subunit 7	NaN	NaN	NaN	NaN	NaN	NaN	NaN	NaN	NaN	NaN	NaN	NaN	NaN	NaN	NaN	NaN	NaN	NaN	NaN	NaN	NaN	NaN	NaN	NaN	NaN	NaN	NaN	NaN	NaN	NaN	NaN	NaN	NaN	NaN	NaN	NaN	NaN	NaN	NaN	NaN	NaN	NaN	NaN	NaN	NaN	NaN
NDUFAF1	H0YNN4;H0YNB7;H0YL22;A0A024R9L0;Q9Y375	Complex I intermediate-associated protein 30, mitochondrial	NaN	NaN	NaN	NaN	NaN	NaN	NaN	NaN	NaN	NaN	NaN	NaN	NaN	NaN	NaN	NaN	NaN	NaN	NaN	NaN	NaN	NaN	NaN	NaN	NaN	NaN	NaN	NaN	NaN	NaN	NaN	NaN	NaN	NaN	NaN	NaN	NaN	NaN	NaN	NaN	NaN	NaN	NaN	NaN	NaN	NaN
AQR	B0AZM4;A8K6F0;A0A024R9L1;O60306	Intron-binding protein aquarius	NaN	NaN	NaN	NaN	NaN	NaN	NaN	NaN	NaN	NaN	NaN	NaN	NaN	NaN	NaN	NaN	NaN	0.6333	0.111461	NaN	NaN	NaN	NaN	NaN	NaN	NaN	0.693411	NaN	NaN	NaN	NaN	NaN	0.217139	NaN	NaN	NaN	NaN	NaN	0.839286	NaN	NaN	NaN	NaN	NaN	NaN	NaN
ST3GAL1	E5RHV6;A0A024R9L6;Q11201;E5RGL4	CMP-N-acetylneuraminate-beta-galactosamide-alpha-2,3-sialyltransferase 1	NaN	NaN	NaN	NaN	NaN	NaN	NaN	NaN	NaN	NaN	NaN	NaN	NaN	NaN	NaN	NaN	NaN	NaN	NaN	NaN	NaN	NaN	NaN	NaN	NaN	NaN	NaN	NaN	NaN	NaN	NaN	NaN	NaN	NaN	NaN	NaN	NaN	NaN	NaN	NaN	NaN	NaN	NaN	NaN	NaN	NaN
LRRC57	H3BSW0;A0A024R9M3;Q8N9N7	Leucine-rich repeat-containing protein 57	NaN	NaN	NaN	NaN	NaN	NaN	NaN	NaN	NaN	NaN	NaN	NaN	NaN	NaN	NaN	NaN	NaN	NaN	NaN	NaN	NaN	NaN	NaN	NaN	NaN	NaN	NaN	NaN	NaN	NaN	NaN	NaN	NaN	NaN	NaN	NaN	NaN	NaN	NaN	NaN	NaN	NaN	NaN	NaN	NaN	NaN
CHP;CHP1	A0A024R9M9;Q99653;H0YKE7;F5GX29;H0YNG9;B4DSB5	Calcineurin B homologous protein 1	0.755377	0.653196	0.142736	NaN	NaN	NaN	0.63236	0.772333	-0.0309307	NaN	0.959811	0.953975	0.644698	NaN	NaN	0.34738	1.25587	-0.0367159	0.363956	0.682794	1.4669	NaN	0.461912	0.939236	-0.492212	0.924523	-0.761219	0.219624	0.380916	NaN	1.10454	0.161985	0.272526	NaN	0.710166	-0.133958	-0.0690147	1.38717	-0.335266	NaN	NaN	NaN	0.668914	1.93887	3.12381	-0.992176
EMC4;TMEM85	S4R329;H0YK61;H0YNK0;H0YNK8;A0A0S2Z598;A0A024R9N3;Q5J8M3;H0YLP8	ER membrane protein complex subunit 4	NaN	NaN	NaN	NaN	NaN	NaN	NaN	NaN	NaN	NaN	NaN	NaN	NaN	NaN	NaN	NaN	NaN	NaN	NaN	NaN	NaN	NaN	NaN	NaN	NaN	NaN	NaN	NaN	NaN	NaN	NaN	NaN	NaN	NaN	NaN	NaN	NaN	NaN	NaN	NaN	NaN	NaN	NaN	NaN	NaN	NaN
EHD4	A8K9B9;A0A024R9N6;Q9H223	EH domain-containing protein 4	0.204235	0.382501	-0.0108495	0.232426	0.438447	-0.066829	1.72147	0.0865477	0.126491	0.0898169	0.62115	0.599328	0.350718	0.370879	0.0123732	-0.328765	0.785939	-0.42706	0.150807	0.346116	0.0384803	0.661265	0.106167	-0.198546	-0.427968	-0.310542	0.239141	-0.419815	0.272837	-0.502223	-0.484284	-0.231569	-0.0573463	-0.222948	-0.118327	-0.630415	-0.389266	-0.391202	-0.294449	-0.248888	-0.251679	0.00397872	-0.327801	-0.244092	-0.640451	-0.235948
FAM82C;RMDN3	A0A024R9P6;Q96TC7;B3KUI4;H0YMB1;H0YLG5	Regulator of microtubule dynamics protein 3	NaN	NaN	NaN	0.993666	-1.40828	-0.941782	NaN	NaN	NaN	-0.357721	NaN	NaN	NaN	0.928484	NaN	NaN	NaN	NaN	0.762632	NaN	NaN	NaN	NaN	-0.198871	NaN	NaN	NaN	-0.420617	NaN	NaN	NaN	NaN	NaN	-0.319734	NaN	-1.28297	NaN	NaN	NaN	NaN	NaN	NaN	NaN	NaN	NaN	NaN
VPS18	A0A024R9R3;Q9P253	Vacuolar protein sorting-associated protein 18 homolog	NaN	NaN	NaN	NaN	NaN	NaN	NaN	NaN	NaN	NaN	NaN	NaN	NaN	NaN	NaN	NaN	NaN	NaN	NaN	NaN	NaN	NaN	NaN	NaN	NaN	NaN	NaN	NaN	NaN	NaN	NaN	NaN	NaN	NaN	NaN	NaN	NaN	NaN	NaN	NaN	NaN	NaN	NaN	NaN	NaN	NaN
GUF1	A0A024R9T3;Q8N442	Translation factor GUF1, mitochondrial	NaN	NaN	NaN	NaN	NaN	NaN	NaN	NaN	NaN	NaN	NaN	NaN	NaN	NaN	NaN	NaN	NaN	NaN	NaN	NaN	NaN	NaN	NaN	NaN	NaN	NaN	NaN	NaN	NaN	NaN	NaN	NaN	NaN	NaN	NaN	NaN	NaN	NaN	NaN	NaN	NaN	NaN	NaN	NaN	NaN	NaN
OCIAD1	A0A024R9U3;Q9NX40;D6RG39;D6RIT9;D6RDK6;D6RBN5	OCIA domain-containing protein 1	-0.887651	-1.84914	-1.94887	-1.64592	-1.51005	-1.48101	-1.22177	-1.61811	-1.03813	-1.02238	-1.12925	-0.629301	-1.87575	-0.429321	-1.57665	-2.14607	0.0675941	-1.52261	-1.60257	-1.70148	-2.37059	-1.64385	-2.26573	-0.619421	-2.07586	-1.90747	-0.249447	-1.99415	-1.20472	-1.48721	-2.32493	-1.47051	-0.945516	-0.759904	-0.03563	-1.68198	-1.36686	-0.75905	-1.27147	-0.748488	-1.07682	-1.90706	-1.15534	-1.58331	-0.503424	-1.5944
HUWE1	A0A024R9U8;A0A024R9W5;Q7Z6Z7;A0A024R9Y3;Q5H924	E3 ubiquitin-protein ligase HUWE1	-0.00833343	0.520321	-1.64446	-0.279989	0.0609044	-0.471789	0.263867	-0.720764	0.444688	0.650081	0.277431	0.336776	0.224615	0.149509	-0.449942	0.223026	1.12613	0.718611	-0.158033	-0.538616	1.25708	-0.864662	0.516771	0.432965	-1.3936	-0.521456	-0.549752	-2.02966	0.526873	-0.528851	-0.493786	-0.444828	0.590045	-0.793919	0.281667	-1.1308	0.709188	0.657645	0.682014	-1.46397	-1.10306	-0.582886	-1.52683	NaN	-2.00292	0.760779
LOC92689;FAM114A1	B4DL61;A0A024R9V7;Q8IWE2;B3KSS5	Protein NOXP20	NaN	NaN	NaN	NaN	NaN	NaN	NaN	NaN	NaN	NaN	NaN	NaN	NaN	NaN	NaN	NaN	NaN	NaN	NaN	NaN	NaN	NaN	NaN	NaN	NaN	NaN	NaN	NaN	NaN	NaN	NaN	NaN	NaN	NaN	NaN	NaN	NaN	NaN	NaN	NaN	NaN	NaN	NaN	NaN	NaN	NaN
SLC30A9	B2R745;A0A024R9W8;A0A0S2Z514;Q6PML9;B4DSU2	Zinc transporter 9	NaN	NaN	NaN	NaN	NaN	NaN	NaN	NaN	NaN	NaN	NaN	NaN	NaN	NaN	NaN	NaN	NaN	NaN	NaN	0.690219	NaN	NaN	NaN	NaN	NaN	NaN	4.24896	NaN	NaN	NaN	NaN	NaN	NaN	NaN	NaN	NaN	NaN	NaN	NaN	NaN	NaN	NaN	NaN	NaN	NaN	NaN
GNPDA2	A0A024R9X5;Q8TDQ7	Glucosamine-6-phosphate isomerase;Glucosamine-6-phosphate isomerase 2	NaN	NaN	NaN	NaN	NaN	NaN	NaN	NaN	NaN	NaN	NaN	NaN	NaN	NaN	NaN	NaN	NaN	NaN	NaN	NaN	NaN	NaN	NaN	NaN	NaN	NaN	NaN	NaN	NaN	NaN	NaN	NaN	NaN	NaN	NaN	NaN	NaN	NaN	NaN	NaN	NaN	NaN	NaN	NaN	NaN	NaN
MAGED2	A0A024R9Y7;Q9UNF1;B4DX55;Q5H909;Q5H907	Melanoma-associated antigen D2	0.6007	0.872111	-0.291888	0.503368	-0.17176	0.0613755	0.437732	-0.159295	0.13606	0.575766	0.0764546	0.269756	0.404439	1.0644	NaN	0.118697	0.85727	NaN	-0.0262426	-0.245008	-0.14209	0.515553	-0.526214	-0.141026	0.259891	-0.0687192	-0.191184	0.23782	-0.832716	0.0809117	-0.709061	0.682872	NaN	0.00962585	0.501055	-1.18517	NaN	0.543236	1.037	-0.187514	-1.21003	0.379432	-0.890563	-0.358846	-2.17018	-1.24744
NDUFA4	A0A024R9Z0;O00483	Cytochrome c oxidase subunit NDUFA4	-0.754856	-0.523283	-1.02189	-1.13539	-0.0928775	-0.64574	-0.37421	-1.20792	-0.932336	-0.946835	-1.57286	-0.583689	-0.409373	-1.02645	-1.16611	-1.63709	-0.895219	-1.25219	-1.22894	-1.00971	-1.41434	-1.41975	-0.606829	-1.16271	-1.29962	-1.22659	-0.788698	-0.912994	-0.569043	-1.1816	-1.15997	-1.09612	-1.2309	-0.56212	-0.621048	-1.23022	-0.703905	-1.52638	-1.00132	-0.802034	-0.980464	-0.827174	-0.794455	-0.290268	-0.971872	-0.85543
TMEM106B	C9JZ87;A0A024R9Z1;Q8N353;Q9NUM4;C9J998;F2Z3N7	Transmembrane protein 106B	NaN	NaN	NaN	NaN	NaN	NaN	NaN	NaN	NaN	NaN	NaN	NaN	NaN	NaN	NaN	NaN	NaN	NaN	NaN	NaN	NaN	NaN	NaN	NaN	NaN	NaN	NaN	NaN	NaN	NaN	NaN	NaN	NaN	NaN	NaN	NaN	NaN	NaN	NaN	NaN	NaN	NaN	NaN	NaN	NaN	NaN
MPP6	A0A024RA25;Q9NZW5;B8ZZG1;C9JGI8;C9J4Q3	MAGUK p55 subfamily member 6	NaN	NaN	NaN	NaN	NaN	NaN	NaN	NaN	NaN	NaN	NaN	NaN	NaN	NaN	NaN	NaN	NaN	NaN	NaN	NaN	NaN	NaN	NaN	NaN	NaN	NaN	NaN	NaN	NaN	NaN	NaN	-0.347099	NaN	NaN	-1.36726	NaN	NaN	NaN	NaN	NaN	NaN	NaN	NaN	NaN	NaN	NaN
AQP1	B4DNW4;B2R6P2;A0A024RA31;B4E220;K7N7A8;P29972;Q6JSD7;Q6JSD8;B4DW35;B4DPF5;B4DVA2;B4E3E3;B4F4P6;A0A0M7BEW0	Aquaporin-1	NaN	NaN	NaN	NaN	NaN	NaN	NaN	NaN	NaN	NaN	NaN	NaN	NaN	NaN	NaN	NaN	NaN	NaN	NaN	NaN	NaN	NaN	NaN	NaN	NaN	NaN	NaN	NaN	NaN	NaN	NaN	NaN	NaN	NaN	NaN	NaN	NaN	NaN	NaN	NaN	NaN	NaN	NaN	NaN	NaN	NaN
BZW2	B7Z4K8;E7ETZ4;B3KM68;A0A024RA42;Q9Y6E2;Q75MG1;B5MCH7;B5MCE7;E9PFD4	Basic leucine zipper and W2 domain-containing protein 2	-0.386684	-0.0201999	-1.57257	-1.25191	-1.40125	-1.19475	-0.44742	-1.26793	-1.72295	-1.79879	-0.556959	0.46554	-0.899042	-1.76464	-0.345396	-2.47888	-1.31296	-0.909889	-0.351749	-0.582965	-1.19545	NaN	-0.706377	-0.550507	-1.82745	-1.46158	-1.0432	-0.162423	-2.04502	-0.909888	-0.462157	-1.46095	-0.351123	-0.76998	NaN	-0.912079	NaN	NaN	-0.43281	-0.748508	-1.03297	-0.762316	-1.15529	-1.16572	-0.728435	-0.40523
PSMA2	Q53GF5;A0A024RA52;P25787;C9JCK5	Proteasome subunit alpha type;Proteasome subunit alpha type-2	-0.351693	-0.795489	-0.391185	-0.447336	-1.36397	-0.9824	0.0432892	-1.07516	-0.52138	-0.599054	0.345488	0.0906132	-0.646271	-1.30405	-0.599342	-0.906134	-1.07984	-0.848148	-0.155066	-0.60417	-0.274999	-0.773573	-1.2553	-0.0932138	-1.04097	-0.291318	-0.874041	-0.696984	-0.46141	-0.957347	-0.767525	-0.909271	-0.889959	-0.967511	-1.14769	-0.770479	-0.424525	-1.22132	-1.33327	-0.65628	0.132353	-0.116754	-0.448299	NaN	-0.884559	-1.74709
COA1;FLJ10803	C9JA07;A0A024RA60;Q9GZY4;C9J6J1;B3KUH1	Cytochrome c oxidase assembly factor 1 homolog	NaN	NaN	NaN	NaN	NaN	NaN	NaN	NaN	NaN	NaN	NaN	NaN	NaN	NaN	NaN	NaN	NaN	NaN	NaN	NaN	NaN	NaN	NaN	NaN	NaN	NaN	NaN	NaN	NaN	NaN	NaN	NaN	NaN	NaN	NaN	NaN	NaN	NaN	NaN	NaN	NaN	NaN	NaN	NaN	NaN	NaN
HIBADH	A0A024RA75;P31937	3-hydroxyisobutyrate dehydrogenase;3-hydroxyisobutyrate dehydrogenase, mitochondrial	-0.10705	-0.106361	-0.245968	-0.439025	-0.267119	-0.104087	0.877729	-0.317337	-0.0438786	-0.0083011	0.0577034	0.120228	-0.134941	0.240658	-0.387181	-0.216768	0.432369	-0.106419	-0.220464	-0.0948986	-0.34536	0.272262	-0.330937	-0.23895	0.304627	-0.26568	-0.0335707	0.115505	-0.259036	-0.127162	-0.902118	0.191865	0.0316145	-0.687149	-0.161694	-0.122705	0.338633	-0.415756	0.586041	-0.259578	0.0447166	-0.297774	-2.06097	0.420974	-0.676448	-0.254064
MFAP2	A0A024RA94;P55001	Microfibrillar-associated protein 2	0.498914	0.135738	0.99588	0.472213	1.18355	0.120325	1.19777	0.455165	NaN	0.0239536	1.21617	1.9369	-0.576041	0.665709	0.204187	-0.431998	0.941483	-0.764055	0.327946	0.00253099	0.575443	1.23657	-0.629753	0.102063	-0.305098	-0.887459	0.866104	-1.1398	0.851938	0.739536	0.308519	0.503858	0.0670643	-0.129887	1.19377	-0.13829	1.41259	0.413077	0.321236	-0.191563	-0.258715	NaN	0.289739	0.640209	NaN	0.564553
PADI2	B4DIU3;A0A024RA98;Q9Y2J8	Protein-arginine deiminase type-2	NaN	NaN	-0.0725861	NaN	NaN	NaN	NaN	NaN	NaN	NaN	NaN	NaN	NaN	NaN	NaN	NaN	NaN	NaN	NaN	NaN	NaN	NaN	-0.237686	NaN	NaN	NaN	NaN	NaN	NaN	NaN	NaN	NaN	NaN	NaN	NaN	NaN	NaN	NaN	NaN	NaN	NaN	-0.533962	-1.82391	NaN	NaN	NaN
C1orf166;MUL1	A0A024RAA0;Q969V5;B4DE24;B7Z8S4	Mitochondrial ubiquitin ligase activator of NFKB 1	NaN	NaN	NaN	NaN	NaN	NaN	NaN	NaN	NaN	NaN	NaN	NaN	NaN	-0.534061	NaN	NaN	NaN	NaN	NaN	NaN	NaN	NaN	-0.663846	NaN	NaN	NaN	NaN	NaN	NaN	NaN	NaN	NaN	NaN	NaN	NaN	NaN	NaN	NaN	NaN	NaN	NaN	NaN	NaN	NaN	NaN	NaN
ECE1	B4DKB2;A0A024RAB0;A0A024RAB2;A0A024RAF7;P42892	Endothelin-converting enzyme 1	NaN	NaN	NaN	NaN	NaN	NaN	NaN	-0.330329	NaN	NaN	NaN	NaN	NaN	NaN	NaN	NaN	NaN	NaN	NaN	NaN	NaN	NaN	NaN	NaN	NaN	NaN	NaN	NaN	NaN	NaN	NaN	NaN	NaN	NaN	NaN	NaN	NaN	NaN	NaN	NaN	NaN	NaN	NaN	NaN	NaN	NaN
ASAP3;DDEFL1	V9GY49;Q6PJ46;A0A087X0Y5;A0A024RAB1;Q8TDY4	Arf-GAP with SH3 domain, ANK repeat and PH domain-containing protein 3	NaN	NaN	NaN	NaN	NaN	NaN	NaN	NaN	NaN	NaN	NaN	NaN	NaN	NaN	NaN	NaN	NaN	NaN	NaN	NaN	NaN	NaN	NaN	NaN	NaN	NaN	NaN	NaN	NaN	NaN	NaN	NaN	NaN	NaN	NaN	NaN	NaN	NaN	NaN	NaN	NaN	NaN	NaN	NaN	NaN	NaN
HSPG2	A0A024RAB6;P98160	Basement membrane-specific heparan sulfate proteoglycan core protein;Endorepellin;LG3 peptide	1.01773	0.371953	0.730388	0.993317	1.15639	0.999537	1.27076	0.976575	0.813455	1.06504	1.29764	1.90221	0.608733	1.19375	0.873644	0.696752	1.23163	0.790929	0.815766	1.22908	1.22482	1.61668	0.67486	0.855058	1.06371	0.712966	1.49609	0.739796	1.60415	1.25271	1.0142	1.38101	1.07846	1.30254	1.72003	0.807461	1.70887	1.15201	1.42608	0.584161	0.739289	1.17612	0.717205	1.20125	0.608114	1.36114
RCC2	A5PLK7;A0A024RAC5;Q9P258	Protein RCC2	NaN	NaN	NaN	NaN	NaN	NaN	1.02882	NaN	NaN	NaN	NaN	NaN	NaN	1.90136	1.32272	NaN	NaN	NaN	NaN	NaN	NaN	NaN	3.35433	NaN	NaN	NaN	NaN	NaN	NaN	NaN	NaN	2.38752	-0.900645	NaN	0.732884	NaN	NaN	NaN	1.17654	NaN	NaN	NaN	NaN	NaN	NaN	-1.34829
TCEB3	A0A024RAC6;Q14241	Transcription elongation factor B polypeptide 3	NaN	NaN	NaN	NaN	NaN	NaN	NaN	NaN	NaN	NaN	NaN	NaN	NaN	NaN	NaN	NaN	NaN	NaN	NaN	NaN	NaN	NaN	NaN	NaN	NaN	NaN	NaN	NaN	NaN	NaN	NaN	NaN	NaN	NaN	NaN	NaN	NaN	NaN	NaN	NaN	NaN	NaN	NaN	NaN	NaN	NaN
ZUBR1	A0A024RAC9		NaN	NaN	NaN	NaN	NaN	NaN	NaN	NaN	NaN	NaN	NaN	NaN	NaN	NaN	NaN	NaN	NaN	NaN	NaN	NaN	NaN	NaN	NaN	NaN	NaN	NaN	NaN	NaN	NaN	NaN	NaN	NaN	NaN	NaN	NaN	NaN	NaN	NaN	NaN	NaN	NaN	NaN	NaN	NaN	NaN	NaN
DDOST	A0A0C4DGS1;A0A024RAD5;P39656	Dolichyl-diphosphooligosaccharide--protein glycosyltransferase 48 kDa subunit	-0.190873	-0.96089	-0.314828	-0.0790682	-0.535459	-0.884453	0.164959	-0.657322	-1.02153	-1.01392	-1.24752	-0.0418659	-0.299355	-0.260707	0.0416092	-1.32555	0.61985	-0.580059	-0.759805	0.00407248	-0.994516	-0.0514619	-0.375876	-0.476487	-0.302018	-1.28398	-0.778855	-0.858545	-0.751046	-0.621934	-1.07301	-1.53315	-1.19756	-1.01907	-0.802246	-1.19878	-0.829158	-1.32681	-1.0056	-1.53533	-1.2302	-0.799117	-1.27443	-1.10141	-1.15053	-0.796281
ALDH4A1	A0A024RAD8;P30038	Delta-1-pyrroline-5-carboxylate dehydrogenase, mitochondrial	-0.926851	-0.105043	-0.767055	0.0359762	-0.403309	-0.0563427	-0.226345	-0.266089	-0.193437	-0.723209	-0.227723	0.227879	-0.641849	0.218892	-0.229452	-0.28253	-0.112342	-0.424456	-0.0837279	-0.724978	-0.156283	-0.130191	-0.16997	-0.149907	-0.507724	0.368453	0.00843389	-0.956984	-0.222701	-0.557307	0.102127	-0.402738	-0.0419601	-0.827954	-0.351869	-0.181815	-0.426079	-0.395644	-0.475195	-0.781108	-0.456237	-0.221363	-0.554775	-0.137101	-0.855466	-0.545948
CDC42;hCG_39634	A0A024RAE4;B4E1U9;P60953;A0A024R9T1;B7ZAY4;B4DMH5;Q5JYX0;Q9UJM1	Cell division control protein 42 homolog	-0.70231	-1.19925	-1.0781	-0.604351	-1.2672	-0.75464	-0.598344	-1.11536	-0.425755	-0.784786	-0.882969	-0.213056	-1.86205	-1.17859	-1.36542	-0.971816	0.0256468	-1.63833	-1.24333	-0.926443	-1.28394	-0.366887	-1.51872	-1.3906	-1.01375	-1.09074	-0.494668	-1.42611	-0.728661	-1.38866	-1.26423	-0.976037	-2.02217	-1.25018	-1.4517	-1.61769	-1.3562	-1.32262	-0.918568	-1.54007	-1.01364	-0.371379	-1.30307	-0.99084	-1.15924	-0.567894
CDC42	A0A024RAE6		NaN	NaN	NaN	NaN	0.0926939	NaN	NaN	NaN	NaN	0.33179	NaN	NaN	NaN	NaN	NaN	NaN	NaN	NaN	NaN	NaN	NaN	NaN	NaN	NaN	NaN	NaN	NaN	NaN	NaN	NaN	NaN	NaN	NaN	NaN	NaN	NaN	NaN	NaN	NaN	NaN	NaN	NaN	NaN	NaN	NaN	NaN
BIN1	B7Z6Y2;A0A024RAI6;A0A024RAG9;A0A024RAG8;A0A024RAE9;A0A024RAI4;A0A024RAI5;Q8WWH9;A0A024RAJ2;A0A024RAJ3;A0A024RAF0;A0A024RAF6;A0A024RAF1;O00499;Q9BTH3;B7Z2Z2	Myc box-dependent-interacting protein 1	NaN	NaN	NaN	NaN	NaN	NaN	NaN	NaN	NaN	NaN	NaN	NaN	NaN	NaN	NaN	NaN	NaN	NaN	NaN	NaN	NaN	NaN	NaN	NaN	NaN	NaN	NaN	NaN	NaN	NaN	NaN	NaN	NaN	NaN	NaN	NaN	NaN	NaN	NaN	NaN	NaN	NaN	NaN	NaN	NaN	NaN
RALB	A0A024RAG3;P11234;C9J6B1;C9JQB3;B4E364	Ras-related protein Ral-B	-0.397921	0.388683	-0.924351	-0.531538	0.592603	-0.694783	-1.25358	-0.45755	-0.588602	-1.06653	-0.610393	-0.248535	0.0830832	-0.434126	-0.492725	-1.03841	-0.555026	-0.802566	-0.677338	-0.890473	-0.678768	-1.13617	-0.70552	-0.916001	-0.780304	-0.513382	-0.361432	-0.978197	-0.182946	-1.39901	-0.459913	-0.660146	-0.695924	-0.617173	-0.740797	-1.24153	-1.00639	-0.91219	-0.419431	-0.793617	-0.0459226	-0.521397	-0.754795	-0.776832	-1.27801	0.00553615
DDX18	Q4ZG72;A0A024RAH8;Q9NVP1	ATP-dependent RNA helicase DDX18	NaN	NaN	NaN	NaN	NaN	NaN	NaN	NaN	NaN	NaN	NaN	NaN	NaN	NaN	NaN	NaN	NaN	NaN	-0.0169242	NaN	NaN	NaN	NaN	NaN	NaN	-1.35208	NaN	NaN	NaN	NaN	NaN	-0.391658	-0.0294175	NaN	NaN	NaN	NaN	NaN	NaN	-2.01799	-1.15173	-1.15653	NaN	NaN	NaN	NaN
ACTR3	A0A024RAI1;P61158;B4DXW1;Q59FV6;B4DT29;B4DTI0	Actin-related protein 3	-0.464928	-0.162557	-0.409448	-0.560726	-0.280509	-0.631751	-1.05871	-0.37797	0.221186	-1.2244	-0.033096	0.391264	0.101939	-0.429549	-0.597099	-0.726474	-0.084233	-0.811872	0.212852	-0.355285	-0.348991	-0.164406	-0.492127	-1.07876	-1.19361	-0.599305	0.334182	-0.703176	0.0191986	-0.797203	-0.627223	0.0844728	-0.353383	-0.544016	-0.287023	-0.764944	-0.198981	-0.338502	-0.42468	-0.638389	-0.112857	-0.0804366	-0.904719	-0.458437	-0.564689	-0.575796
MRPS27	G5EA06;B4DT94;A0A024RAJ1;Q92552;D6RH20;Q6PKB3;B4DKI9;Q8N6F2	28S ribosomal protein S27, mitochondrial	-1.1001	NaN	NaN	-1.93497	-1.23665	-0.903282	-1.4401	-2.76199	-0.763852	-0.78031	-1.66442	-0.489686	-1.02655	-1.35908	-0.0581338	-2.15621	NaN	-0.355918	-0.76384	-0.875557	NaN	NaN	-0.630405	-0.220593	-1.23946	-1.39545	-0.144463	-1.35333	-1.74971	-1.93727	-1.77264	-0.707088	-0.150823	-1.6059	-0.558503	-1.47812	-0.0249046	-1.33979	-0.613343	-1.07865	-0.695679	-1.00733	-1.11663	-1.14757	-1.06039	-0.387142
POLR2D	E9PHV4;A0A024RAJ4;O15514;Q587J0;Q53T47;E9PB93	DNA-directed RNA polymerase II subunit RPB4	NaN	NaN	NaN	NaN	0.285706	NaN	NaN	NaN	NaN	NaN	NaN	NaN	NaN	NaN	NaN	NaN	NaN	NaN	NaN	NaN	NaN	NaN	NaN	NaN	NaN	NaN	NaN	NaN	NaN	NaN	NaN	NaN	NaN	NaN	NaN	NaN	NaN	NaN	NaN	NaN	NaN	NaN	NaN	NaN	NaN	NaN
COL4A3BP	A0A0A0MRE4;A0A024RAJ5;Q9Y5P4;H0Y9J1	Collagen type IV alpha-3-binding protein	NaN	NaN	NaN	NaN	NaN	NaN	NaN	NaN	NaN	NaN	NaN	NaN	NaN	NaN	NaN	NaN	NaN	NaN	NaN	NaN	NaN	NaN	NaN	NaN	NaN	NaN	NaN	NaN	NaN	NaN	NaN	NaN	NaN	NaN	NaN	NaN	NaN	NaN	NaN	NaN	NaN	NaN	NaN	NaN	NaN	NaN
HEXB	A0A024RAJ6;P07686;Q5URX0;H0YA83;H0Y9B6	Beta-hexosaminidase;Beta-hexosaminidase subunit beta;Beta-hexosaminidase subunit beta chain B;Beta-hexosaminidase subunit beta chain A	NaN	NaN	NaN	NaN	NaN	NaN	1.55529	3.12255	NaN	NaN	NaN	NaN	NaN	0.872525	NaN	NaN	NaN	NaN	5.40982	NaN	NaN	NaN	NaN	3.47084	NaN	NaN	NaN	NaN	NaN	2.85225	4.80539	NaN	NaN	NaN	NaN	0.549599	NaN	NaN	NaN	NaN	-0.650895	4.90457	NaN	NaN	0.0292052	NaN
GFM2	A0A024RAJ7;A0A024RAK1;Q969S9	Ribosome-releasing factor 2, mitochondrial	NaN	NaN	NaN	NaN	NaN	NaN	NaN	NaN	NaN	-1.1107	1.40396	NaN	-0.914258	NaN	NaN	NaN	NaN	0.303027	NaN	-0.648005	NaN	NaN	NaN	NaN	NaN	NaN	NaN	NaN	NaN	NaN	NaN	0.238323	NaN	NaN	NaN	NaN	NaN	-0.356933	NaN	NaN	NaN	NaN	NaN	0.334516	NaN	NaN
ARSB	A0A024RAJ9;P15848;A8K4A0	Arylsulfatase B	NaN	-1.12843	NaN	NaN	1.53784	NaN	NaN	NaN	NaN	NaN	NaN	NaN	1.09804	NaN	NaN	NaN	NaN	NaN	NaN	NaN	NaN	NaN	NaN	NaN	NaN	NaN	NaN	NaN	NaN	NaN	NaN	NaN	NaN	NaN	NaN	NaN	NaN	NaN	NaN	NaN	NaN	NaN	NaN	NaN	NaN	NaN
CKMT2	A0A024RAK5;P17540;B2R8A3;B3KVA7	Creatine kinase S-type, mitochondrial	1.15094	0.709069	0.775961	0.602338	0.237691	0.352944	0.0871881	0.782798	0.930983	0.374637	0.560326	0.154572	0.446929	-0.151328	0.42989	1.01908	0.184301	0.561247	0.737813	0.542942	1.67442	1.09501	1.34357	1.13262	1.3009	1.99936	-0.0311509	1.7148	1.05619	1.27239	1.17044	0.541406	0.334996	1.04754	0.179283	0.906037	0.706785	0.253221	0.759686	2.04585	1.69589	0.711471	1.78895	0.863521	1.89212	0.788633
RASA1	B4DTL8;E9PGC0;B4DTX4;A0A024RAL2;P20936	Ras GTPase-activating protein 1	NaN	NaN	NaN	0.926317	NaN	NaN	NaN	NaN	NaN	NaN	NaN	NaN	NaN	NaN	NaN	NaN	NaN	NaN	NaN	NaN	NaN	NaN	NaN	NaN	NaN	NaN	NaN	NaN	NaN	NaN	NaN	NaN	NaN	NaN	NaN	NaN	NaN	NaN	NaN	NaN	NaN	NaN	NaN	NaN	NaN	NaN
TNPO1	A0A024RAM0;Q92973	Transportin-1	-0.193988	0.485919	-0.00832447	1.17033	0.511892	-0.224765	0.233379	0.313948	-0.365246	0.05205	0.249022	-0.078534	-0.921132	0.1583	-1.10694	-1.45867	0.609051	-0.878537	0.267225	-0.37414	0.409262	0.296736	-0.291275	-1.13496	-0.383535	-0.277431	-0.392346	-0.490621	-0.222072	-0.0070906	-0.85965	-0.42746	0.078353	-0.797936	-0.338171	-1.42552	-1.04807	-1.13483	-1.45886	-0.739596	-1.14732	-0.25832	-0.819609	-0.668551	-0.786345	-0.400111
GLRX;hCG_1979388	A0A024RAM2;P35754;D3DQK5	Glutaredoxin-1	NaN	NaN	NaN	NaN	NaN	NaN	NaN	NaN	NaN	NaN	NaN	NaN	NaN	NaN	NaN	NaN	NaN	NaN	NaN	NaN	NaN	NaN	NaN	NaN	NaN	NaN	NaN	NaN	NaN	NaN	NaN	NaN	NaN	NaN	NaN	NaN	NaN	NaN	NaN	0.152324	NaN	NaN	NaN	NaN	NaN	NaN
MAP1B;DKFZp686F1345	A0A024RAM4;P46821;A2BDK6;Q5H9P1	Microtubule-associated protein 1B;MAP1B heavy chain;MAP1 light chain LC1	0.934021	0.579494	1.13665	0.0644171	0.590908	0.621644	1.61698	1.0603	0.934924	0.876218	0.98757	1.56966	0.766673	0.977033	1.11402	-0.306074	1.56421	0.0657884	0.889676	1.10984	0.60731	NaN	0.697668	0.265218	-0.151469	0.141729	0.800411	0.540058	-0.000370305	0.0438542	0.256652	0.433057	-0.0979394	-0.429019	0.320802	-0.817132	-0.283582	-0.729412	0.225123	NaN	NaN	NaN	NaN	NaN	-0.644133	-0.301236
CSDA;YBX3	A0A024RAQ1;P16989;Q59EB5	Y-box-binding protein 3	NaN	NaN	NaN	NaN	NaN	NaN	NaN	NaN	NaN	NaN	NaN	NaN	NaN	NaN	NaN	NaN	NaN	NaN	NaN	NaN	NaN	NaN	NaN	NaN	NaN	NaN	NaN	NaN	NaN	NaN	NaN	NaN	NaN	NaN	NaN	NaN	NaN	NaN	NaN	NaN	NaN	NaN	NaN	NaN	NaN	NaN
CSPG2;VCAN	A0A024RAQ9;Q59FG9;P13611;E9PF17;A0A024RAP3;A0A024RAL1;D6RGZ6	Versican core protein	0.942577	-0.275944	0.0496258	0.54418	0.658219	0.333482	1.59973	0.671085	0.879884	0.448548	0.705737	1.97015	0.103652	0.48067	0.534885	0.318691	1.44461	-0.0227825	0.500383	0.595328	0.693242	1.95458	-0.0456734	-0.0969542	0.853088	-0.0489209	1.31969	-0.577194	1.97944	0.906005	0.238249	0.580174	0.17826	1.0768	0.94426	0.173899	1.50353	1.47214	0.228282	-1.16506	0.0951598	0.710403	0.605641	1.38526	0.384976	1.77639
ERAP1;ARTS-1	A8K6H1;A0A0A7E7X3;A0A0A7E7W9;A0A0A7E7W5;A0A0A7E7T3;A0A0A7E7S5;A0A0A7E6P9;A0A0A7E6P4;A0A0A7E6P0;A0A0A7E6I2;A0A0A7E6D8;A0A0A7E6D4;A0A024RAR8;Q9NZ08;A0A0A7E6K0;A0A0A7E6J5;A0A075BV59;A0A075BSP6;A0A075BTL2	Endoplasmic reticulum aminopeptidase 1	0.97112	NaN	-0.764941	NaN	1.24698	1.00032	NaN	NaN	NaN	NaN	NaN	NaN	NaN	0.662803	0.725542	-0.451435	NaN	1.05673	0.91503	0.548311	0.206995	NaN	NaN	1.30155	NaN	-0.142609	0.284303	NaN	NaN	0.211348	0.0558762	0.0889144	NaN	0.216803	0.336082	NaN	0.881082	-0.433921	0.183008	0.546498	-0.571143	1.04177	0.0803424	NaN	NaN	0.0195505
HIST1H2AH;H2AFJ;HIST1H2AK;HIST1H2AJ;HIST1H2AD;HIST1H2AG	A3KPC7;A0A024RAS2;B2R5B3;A4FTV9;A0A0U1RR32;A0A0U1RRH7;Q99878;Q96KK5;Q9BTM1;P20671;P0C0S8;H0YFX9;B4E0B3	Histone H2A;Histone H2A type 1-J;Histone H2A type 1-H;Histone H2A.J;Histone H2A type 1-D;Histone H2A type 1	-0.369437	-0.741005	-1.01613	-1.21203	-1.69332	-1.16493	-0.799385	-0.759907	-1.66197	-1.46674	-0.151009	-0.55703	-0.835873	-0.579131	-0.494338	-1.04926	-0.487484	-1.44652	-0.308943	-0.75679	-1.19227	-1.21673	-1.2617	-0.246132	-1.14286	-0.725157	-0.725527	-0.86552	-0.294034	-1.22337	-0.694851	-0.978532	-0.934966	-0.898974	-1.15521	-1.03067	-0.717286	-1.26484	-0.241454	-0.446086	-0.032827	0.118451	-0.970505	-1.07335	-0.777667	-1.03624
HEBP1	A0A024RAS8;Q9NRV9;F5GWX2	Heme-binding protein 1	NaN	1.16031	0.502587	-0.472176	1.26803	-0.472696	1.00546	1.01788	NaN	0.989277	NaN	NaN	-0.104928	1.55597	0.319782	0.386659	0.531177	0.421693	0.0334366	NaN	NaN	NaN	1.02072	0.843707	0.222045	0.0765085	0.514841	NaN	NaN	NaN	NaN	1.05382	1.05832	0.962126	NaN	0.0613755	0.0791083	NaN	NaN	NaN	NaN	NaN	NaN	NaN	NaN	NaN
RECQL	A0A024RAV2;P46063	ATP-dependent DNA helicase Q1	0.203677	NaN	0.451938	NaN	-0.899872	NaN	NaN	NaN	NaN	NaN	-1.14854	-0.117296	NaN	NaN	0.0901425	NaN	1.25863	-0.0196308	NaN	NaN	NaN	NaN	1.30376	NaN	NaN	NaN	1.18269	NaN	NaN	NaN	NaN	NaN	NaN	NaN	NaN	NaN	NaN	NaN	NaN	NaN	NaN	NaN	NaN	NaN	NaN	NaN
CSDA	A0A024RAV4;Q96GD7		NaN	NaN	NaN	NaN	NaN	NaN	NaN	NaN	NaN	NaN	NaN	NaN	NaN	NaN	NaN	NaN	NaN	NaN	NaN	NaN	NaN	NaN	NaN	NaN	NaN	NaN	NaN	NaN	NaN	NaN	NaN	NaN	NaN	-0.221073	NaN	NaN	NaN	NaN	NaN	-0.740107	NaN	NaN	NaN	NaN	NaN	NaN
SURB7;MED21	A0A024RAW0;F5H872;Q13503	Mediator of RNA polymerase II transcription subunit 21	NaN	NaN	NaN	NaN	NaN	NaN	NaN	NaN	NaN	NaN	NaN	NaN	NaN	NaN	NaN	NaN	NaN	NaN	NaN	NaN	NaN	NaN	NaN	NaN	NaN	NaN	NaN	NaN	NaN	NaN	NaN	NaN	NaN	NaN	NaN	NaN	NaN	NaN	NaN	NaN	NaN	NaN	NaN	NaN	NaN	NaN
WBP11	B4DMD3;B4DY34;A0A024RAW9;Q9Y2W2	WW domain-binding protein 11	NaN	NaN	NaN	NaN	NaN	NaN	NaN	NaN	NaN	NaN	NaN	NaN	NaN	NaN	NaN	NaN	NaN	NaN	NaN	NaN	NaN	NaN	NaN	NaN	NaN	NaN	NaN	NaN	NaN	NaN	NaN	NaN	NaN	NaN	NaN	NaN	NaN	NaN	NaN	NaN	NaN	NaN	NaN	NaN	NaN	NaN
KRT18	B2RA03;A0A024RAY2;P05783;F8VZY9;I6L965	Keratin, type I cytoskeletal 18	-1.26203	-2.40194	-1.8356	-0.868662	-0.700649	-1.27483	-0.702422	-1.32433	-0.927666	-1.47847	-0.994706	-1.13117	-1.69396	-1.16681	-1.13401	-1.67579	-0.821755	-1.67512	-0.707471	-1.82877	-2.03215	-0.94604	-0.988351	-1.55774	-1.64587	-1.39278	-1.31807	-1.43551	-1.36793	-1.41721	-1.94694	-0.902939	-1.0176	-1.4774	-1.1622	-1.77725	-1.2055	-1.52285	-0.929615	-1.77354	-1.72848	-1.119	-2.06819	-1.43366	-1.38124	-1.4729
PLEKHA5	A0A024RAY7;Q9HAU0;B4DHK5;A0JP02;B4DMB9;B4DJX4	Pleckstrin homology domain-containing family A member 5	-0.397962	0.741664	0.281497	-0.45146	-1.45635	-2.29785	-0.386314	-1.89979	-1.86734	-1.77761	-0.481947	-0.359991	-0.690042	-0.974073	-2.07418	-1.56538	-0.937278	-0.845613	-0.600793	-1.4427	NaN	0.639823	0.280333	-0.853451	-0.492914	-1.17704	-0.717882	0.544308	-2.36076	-0.171079	-0.441731	0.224732	-0.241578	-0.889162	NaN	-1.16553	-2.39243	NaN	-1.54792	-2.13009	-1.53814	-0.488085	-0.550014	NaN	NaN	-1.36475
CALCOCO1	B4DG60;A0A024RAZ1;Q9P1Z2;B3KS47;B4DKB9	Calcium-binding and coiled-coil domain-containing protein 1	NaN	NaN	NaN	NaN	NaN	NaN	NaN	NaN	NaN	NaN	NaN	NaN	NaN	NaN	NaN	NaN	NaN	NaN	NaN	NaN	NaN	NaN	NaN	NaN	NaN	NaN	NaN	NaN	NaN	NaN	NaN	NaN	NaN	NaN	NaN	NaN	NaN	NaN	NaN	NaN	NaN	NaN	NaN	NaN	NaN	NaN
HNRNPA1;HNRPA1;hCG_2020860;RP11-78J21.1;HNRNPA1L2	F8W6I7;A0A024RB53;A0A024RAZ7;P09651;A0A024RC46;Q6IPF2;Q9BSM5;Q0VAC0;F8VZ49;A0A024QZ98;Q32P51;F8VTQ5;B4DP35;B4E0B5	Heterogeneous nuclear ribonucleoprotein A1;Heterogeneous nuclear ribonucleoprotein A1, N-terminally processed;Heterogeneous nuclear ribonucleoprotein A1-like 2	-1.0694	-1.10066	-1.87621	-2.04785	-1.83899	-1.40757	-1.21	-1.6356	-1.64661	-1.47436	-1.1842	-0.987542	-1.62842	-1.16254	-1.91091	-1.45596	-1.05181	-1.62299	-1.40273	-1.31549	-1.72483	-1.42795	-1.21869	-1.31462	-2.04312	-1.77769	-0.889697	-1.94536	-1.51076	-1.61458	-1.84997	-2.0381	-1.17828	-1.68047	-1.73422	-1.78447	-1.11144	-1.55137	-1.30753	-1.79192	-2.08197	-1.51115	-1.94829	-1.84219	-2.09644	-1.6416
ITGA5	A8K6A5;A0A024RB01;P08648;B2R627	Integrin alpha-5;Integrin alpha-5 heavy chain;Integrin alpha-5 light chain	NaN	NaN	NaN	NaN	0.995132	NaN	NaN	NaN	NaN	NaN	NaN	0.0933249	0.597736	-0.439251	NaN	NaN	NaN	NaN	NaN	-0.472176	NaN	NaN	NaN	NaN	NaN	0.864596	NaN	NaN	-0.406428	NaN	-0.218471	-0.237197	NaN	NaN	NaN	NaN	NaN	NaN	NaN	NaN	NaN	NaN	NaN	NaN	NaN	NaN
PPFIBP1	A0A024RB02;Q86W92;F5GZP6;B4DFU8	Liprin-beta-1	NaN	0.657627	NaN	-2.37058	NaN	NaN	NaN	-1.90943	NaN	NaN	-0.760945	NaN	0.407957	NaN	NaN	-0.26111	NaN	-1.09876	NaN	NaN	NaN	NaN	-1.33354	-0.676052	-0.669937	NaN	-1.35643	NaN	-0.114634	-0.726918	-1.13072	-1.61424	0.211465	NaN	NaN	NaN	NaN	-0.0443242	-0.784853	NaN	-2.14701	-1.53735	NaN	-0.088413	-0.45386	NaN
KIAA0528;C2CD5	B7ZLK2;B7ZLK1;A0A024RB03;Q86YS7	C2 domain-containing protein 5	NaN	0.170118	NaN	NaN	NaN	NaN	NaN	NaN	NaN	NaN	NaN	NaN	2.02046	NaN	NaN	NaN	NaN	NaN	NaN	NaN	NaN	NaN	NaN	NaN	NaN	NaN	NaN	NaN	NaN	NaN	NaN	NaN	NaN	NaN	1.46248	NaN	NaN	NaN	NaN	NaN	NaN	NaN	NaN	NaN	NaN	NaN
CD63	F8VNT9;F8VV56;F8W022;F8VWK8;W6A4U0;A0A024RB05;P08962	Tetraspanin;CD63 antigen	NaN	0.653741	NaN	NaN	NaN	NaN	NaN	NaN	NaN	NaN	NaN	NaN	NaN	NaN	NaN	NaN	NaN	NaN	NaN	NaN	NaN	NaN	NaN	NaN	NaN	NaN	NaN	NaN	NaN	NaN	NaN	NaN	NaN	NaN	NaN	NaN	NaN	NaN	NaN	NaN	NaN	NaN	NaN	NaN	NaN	NaN
ERGIC2	A0A024RB08;A0A087WU02;Q9HC06;Q96RQ1;H0YI50;F8VPA6	Endoplasmic reticulum-Golgi intermediate compartment protein 2	1.24986	0.93868	NaN	2.14561	NaN	NaN	NaN	NaN	2.70755	NaN	0.706512	-1.22626	NaN	NaN	NaN	1.07476	1.12869	1.70802	NaN	0.155855	NaN	NaN	NaN	3	0.26278	NaN	NaN	0.187871	NaN	NaN	NaN	1.1512	1.49643	0.0504128	NaN	NaN	NaN	NaN	NaN	1.79766	NaN	NaN	NaN	NaN	NaN	NaN
RAB5B	A0A024RB09;P61020;Q6FI54	Ras-related protein Rab-5B	-0.12903	-0.0927852	0.0208874	0.0214369	-0.130092	-0.189699	0.376703	-0.0298078	-0.283411	-0.0987471	-0.0600608	-0.217099	-0.604862	-0.357529	-0.747043	-0.776156	-0.322341	-0.239182	-0.085629	-0.268513	0.10545	0.114818	-0.489074	0.0955181	-0.810503	-0.745401	-0.465446	-0.753211	-0.255179	-1.13309	-0.90164	-0.639365	-0.506964	-0.997026	-0.287437	-0.986084	-0.52272	-1.02831	-0.738022	-1.07274	-0.28534	-0.361778	-0.475685	-0.331257	-0.955238	-0.626164
CDK2;CDK3	A0A024RB10;A0A024RB77;G3V5T9;P24941;K7EJ83;E7ESI2;B4DDL9;A0A024R8R3;Q00526	Cyclin-dependent kinase 2;Cyclin-dependent kinase 3	NaN	NaN	NaN	NaN	NaN	NaN	NaN	NaN	NaN	NaN	NaN	NaN	NaN	NaN	NaN	NaN	NaN	NaN	NaN	NaN	NaN	NaN	NaN	NaN	NaN	NaN	NaN	NaN	NaN	NaN	NaN	NaN	NaN	NaN	NaN	NaN	NaN	NaN	NaN	NaN	NaN	NaN	NaN	NaN	NaN	NaN
RPS26;RPS26P11	A0A024RB14;P62854;Q75MH1;Q5JNZ5	40S ribosomal protein S26;Putative 40S ribosomal protein S26-like 1	-0.203688	-0.140659	-0.938493	-0.421471	-1.00439	0.209194	-0.449235	-0.761203	-0.952261	-0.939006	-0.814565	-0.219865	-0.445874	-0.693315	-0.284565	-1.41568	0.0310448	-0.717568	0.071715	-0.038174	-0.992698	0.164724	0.103067	-0.749212	-0.832716	-1.31094	-0.774838	0.593224	-1.1994	-0.320811	-1.34459	-0.862041	-0.741856	-0.892673	-0.469267	-1.27667	-0.319937	-1.44775	-0.850117	-1.21639	-0.834302	-0.713425	-0.621397	0.395261	-0.364605	-0.393712
FAM62A;ESYT1	B3KMV5;A0A024RB17;A0A024RB16;Q9BSJ8;B3KY56	Extended synaptotagmin-1	0.679134	0.46556	NaN	NaN	NaN	NaN	NaN	NaN	NaN	NaN	0.544456	NaN	NaN	NaN	-0.13947	0.0996489	NaN	-0.185867	NaN	NaN	NaN	NaN	NaN	NaN	NaN	-0.679402	NaN	NaN	NaN	NaN	NaN	0.104682	0.461738	NaN	NaN	NaN	-0.273814	NaN	0.298156	NaN	0.0110208	NaN	-0.267716	NaN	NaN	-0.16092
PTGES3	A0A024RB32;A0A087WYT3;B3KUY2;Q15185;B4DDC6	Prostaglandin E synthase 3	NaN	NaN	NaN	0.619315	0.337703	-0.250806	NaN	0.0483675	0.331392	-0.0806576	0.408519	1.09468	0.789636	0.669991	NaN	-0.044464	NaN	0.105527	-0.345672	0.0548568	-0.465713	1.41554	0.235769	-0.500091	NaN	-1.49498	0.297484	NaN	-0.588805	-0.34153	NaN	0.0322503	-0.726395	NaN	0.0237097	NaN	0.522343	-0.0607391	-0.62368	NaN	-1.16401	NaN	NaN	NaN	NaN	-0.677801
COPZ1	Q53FU3;A0A024RB72;F8VVA7;P61923;F8VXB1;F8W156;F8W651;F8VYZ4;F8VUC5;F8VXR1	Coatomer subunit zeta-1	-0.471669	-0.0062588	NaN	-1.22759	0.261127	0.780618	0.13236	0.219606	-0.934705	0.14401	NaN	-0.244311	0.721764	0.598326	0.753282	-1.25026	-0.179568	-0.540126	-0.148433	0.405805	NaN	NaN	-0.374253	0.556118	-1.12821	-0.329073	-1.61385	NaN	-0.711583	-2.06188	-0.274604	-1.33699	-1.03852	-1.36306	-1.07147	NaN	-1.22492	-1.83293	-1.48431	-0.0900472	-0.895303	NaN	NaN	NaN	NaN	0.0532992
CS	B4DJV2;A0A024RB75;O75390;B3KTN4;A0A0C4DGI3	Citrate synthase;Citrate synthase, mitochondrial	0.115437	0.14549	0.331559	-0.144502	-0.108495	0.173701	-0.306233	-0.100708	-0.111759	-0.020962	0.493066	-0.267568	0.168524	0.137101	-0.0477573	0.628044	-0.213034	0.310628	0.363584	0.200016	0.0975681	-0.0879441	0.424576	0.327207	0.6238	0.968248	0.634865	0.408446	0.502894	1.01281	0.397439	0.504142	0.432475	0.358066	0.592051	0.50306	0.613198	0.757305	0.744459	0.652557	1.37405	0.748224	0.648958	0.580694	0.912472	0.640355
SUOX	B2R6Y2;A0A024RB79;P51687;D6QX84	Sulfite oxidase, mitochondrial	NaN	-0.473631	-0.140255	NaN	0.0110936	NaN	NaN	NaN	0.245814	NaN	0.290656	1.46801	NaN	NaN	0.82235	NaN	NaN	2.2037	NaN	0.285154	0.824765	NaN	0.454426	0.0306782	0.677413	1.14918	NaN	-0.0996318	0.171206	3.70397	0.25244	-0.0515809	2.90045	-0.525868	-0.361432	0.0869568	1.58476	-0.0928839	-0.883855	1.58065	0.303172	-0.00518435	NaN	-0.753433	NaN	NaN
PA2G4	A8K6Y1;Q6PIN5;A0A024RB85;Q9UQ80;Q05D08;F8VR77	Proliferation-associated protein 2G4	-0.0492475	-0.384187	-0.598173	-0.874822	-0.51442	-0.430093	-0.133046	-0.193266	0.033926	-0.607651	0.258209	-0.142524	-0.628296	-0.212181	-0.745937	-0.771764	0.0100054	-0.50691	-0.109672	-0.561817	-0.424136	-0.168742	-0.490144	-0.0339904	-1.06428	-0.850026	-0.751884	-0.391373	-0.604583	-0.908518	-0.67422	-0.894209	-0.637369	-1.12351	-0.863929	-0.283278	-0.327579	-1.07533	-0.421969	-0.791526	-0.683354	-0.626616	-0.991527	-0.752701	-0.559541	-0.42764
RAP1B	A0A024RB87;P61224;E7ESV4;A0A0J9YXB3;F5H7Y6;A6NIZ1;F5GX62;F5H823;B7ZB78;F5GZG1;Q9BXV4;F5H6R7;F5H004	Ras-related protein Rap-1b;Ras-related protein Rap-1b-like protein	NaN	0.727069	NaN	NaN	NaN	NaN	NaN	NaN	NaN	NaN	NaN	NaN	NaN	NaN	NaN	NaN	NaN	NaN	NaN	NaN	NaN	NaN	0.62707	NaN	NaN	NaN	NaN	NaN	NaN	NaN	NaN	NaN	NaN	NaN	NaN	NaN	NaN	NaN	NaN	NaN	NaN	NaN	NaN	NaN	NaN	NaN
RAB21	A0A024RBA9;Q9UL25;Q96GX3	Ras-related protein Rab-21	-0.26152	1.03467	-0.385957	1.46333	0.240324	0.30815	0.381385	0.252666	-0.244944	-0.128991	0.615211	1.35978	0.0897261	0.883768	0.443249	-0.475801	1.71591	0.245541	0.124597	0.627228	0.529823	2.08489	-0.114755	0.557237	0.195662	-0.504666	0.439009	0.124145	0.230092	0.29116	-0.000591289	-0.133498	-0.0538773	0.450044	0.156671	-0.0609487	-0.52558	-0.263989	0.0978587	-0.514842	-0.760212	-0.0855607	0.166945	-0.573783	-0.743236	-0.193835
SLC16A7	B4DWX9;A0A024RBB2;O60669;F8W0N3	Monocarboxylate transporter 2	NaN	NaN	NaN	NaN	NaN	NaN	NaN	NaN	NaN	NaN	NaN	NaN	NaN	NaN	NaN	NaN	NaN	NaN	NaN	NaN	NaN	NaN	NaN	NaN	NaN	NaN	NaN	NaN	NaN	NaN	NaN	NaN	NaN	NaN	NaN	NaN	NaN	NaN	NaN	NaN	NaN	NaN	NaN	NaN	NaN	NaN
CSRP2	F8VQR7;A0A024RBB5;F8VW96;Q16527	Cysteine and glycine-rich protein 2	NaN	NaN	NaN	NaN	NaN	NaN	NaN	NaN	NaN	NaN	NaN	NaN	NaN	NaN	NaN	NaN	NaN	NaN	NaN	NaN	NaN	NaN	NaN	NaN	NaN	NaN	NaN	NaN	NaN	NaN	NaN	NaN	NaN	NaN	NaN	NaN	NaN	NaN	NaN	NaN	NaN	NaN	NaN	NaN	NaN	NaN
NAP1L1	F8VY35;F5H4R6;H0YIV4;A0A024RBB7;P55209;F8W020;F8W118;F8VV59;A0A024RBE6;F8W0J6;B7Z2V4;F8VRJ2;B7Z5H0;H0YH88;H0YHC3;F8VXI6;F8VUX1;B7Z9C2;F8VVB5	Nucleosome assembly protein 1-like 1	NaN	-1.1375	NaN	-1.02676	NaN	-0.444561	NaN	-2.00608	NaN	NaN	-0.341417	-1.15551	-1.25889	-0.905713	-1.31603	NaN	NaN	NaN	-0.829422	-1.14731	-1.29019	-1.51415	-0.205267	NaN	-0.260788	-0.872957	-1.25272	-0.835035	-1.36115	-1.86017	NaN	-1.46543	-1.32556	-1.56367	-1.18479	-1.73144	-1.40037	-1.98728	-1.44657	-1.98215	-0.884159	NaN	-2.4021	NaN	NaN	NaN
OSBPL8;DKFZp686C0249	A0A024RBB8;Q5HYM3;Q9BZF1;F8VUA7;F8VQX7;Q641R2;Q96E43	Oxysterol-binding protein;Oxysterol-binding protein-related protein 8	NaN	NaN	NaN	NaN	NaN	NaN	NaN	NaN	NaN	NaN	NaN	NaN	NaN	NaN	NaN	NaN	NaN	NaN	NaN	NaN	NaN	NaN	NaN	NaN	NaN	2.35845	NaN	NaN	NaN	NaN	-0.231064	NaN	NaN	NaN	NaN	NaN	NaN	NaN	NaN	NaN	NaN	NaN	NaN	NaN	NaN	NaN
LEMD3	A0A024RBB9;Q9Y2U8	Inner nuclear membrane protein Man1	NaN	NaN	NaN	NaN	NaN	NaN	NaN	NaN	NaN	NaN	NaN	0.373552	NaN	NaN	NaN	NaN	NaN	NaN	NaN	NaN	NaN	NaN	NaN	NaN	NaN	NaN	NaN	NaN	NaN	NaN	NaN	NaN	NaN	NaN	NaN	NaN	NaN	NaN	NaN	NaN	NaN	NaN	NaN	NaN	NaN	NaN
DKFZp686E12166;GNS	B4DTT0;Q7Z3X3;H7C3P4;A8K6V6;A0A024RBC5;F6S8M0;B4E284;P15586;H0YFA9;F5H4C6	N-acetylglucosamine-6-sulfatase	-0.151637	-0.88534	-1.79896	-0.506297	NaN	-1.12394	0.165357	NaN	0.343751	NaN	-0.300696	1.55402	-1.50167	-0.891054	NaN	-0.243791	0.574956	NaN	0.11413	-0.588229	0.652501	0.409144	-0.728661	0.090347	-0.157331	-0.76137	-1.06115	-0.558676	0.423023	-1.05892	-1.28439	-0.358681	-0.829313	NaN	NaN	-0.82326	-2.62117	NaN	NaN	NaN	-1.4974	-1.13822	-1.82477	NaN	NaN	NaN
ATP2B1	A0A024RBC7;P20020;Q59H63;E7ERY9	Calcium-transporting ATPase;Plasma membrane calcium-transporting ATPase 1	NaN	0.188069	NaN	0.522136	NaN	NaN	NaN	1.15502	NaN	NaN	1.09523	NaN	NaN	NaN	NaN	NaN	NaN	NaN	NaN	NaN	NaN	NaN	NaN	NaN	0.0834316	NaN	NaN	NaN	NaN	NaN	NaN	-0.625645	NaN	NaN	NaN	NaN	NaN	NaN	NaN	NaN	NaN	NaN	NaN	NaN	NaN	NaN
NUDT4	A0A024RBD0;Q9NZJ9;F8VRL4;F8VRR0;A0A0C4DGJ4	Diphosphoinositol polyphosphate phosphohydrolase 2	-1.12674	-2.25828	-1.54857	-0.594034	NaN	NaN	NaN	-1.64501	NaN	-1.51874	-1.18973	NaN	-1.40097	-1.1995	-1.04586	-1.88426	-0.454071	NaN	-1.41163	-1.91403	-1.6996	NaN	-0.90627	-1.9102	-1.89542	-1.98236	NaN	-2.07625	-1.00506	-1.51273	-2.01734	-0.934479	-1.28429	-1.58318	-1.41922	-2.58024	NaN	-1.8737	NaN	-2.07584	NaN	NaN	NaN	-1.58569	-2.02673	-1.57226
NEDD1	A8K1Z3;A0A024RBE5;Q8NHV4	Protein NEDD1	NaN	NaN	NaN	NaN	NaN	NaN	NaN	NaN	NaN	NaN	NaN	NaN	NaN	NaN	NaN	NaN	NaN	0.958757	NaN	NaN	NaN	NaN	NaN	NaN	NaN	NaN	NaN	NaN	NaN	NaN	NaN	NaN	NaN	NaN	NaN	NaN	NaN	NaN	NaN	NaN	NaN	NaN	NaN	NaN	NaN	NaN
TMPO	A0A024RBE7;P42167;G5E972	Lamina-associated polypeptide 2, isoforms beta/gamma;Thymopoietin;Thymopentin	-0.941689	-1.43479	-0.645322	-1.1341	0.366209	-1.67692	-1.35061	-1.62429	-0.515914	-1.27255	-1.3584	-0.192172	-0.122801	-0.140314	-1.21693	-0.511859	-0.343692	-1.1119	-1.35032	-1.31885	NaN	-1.11776	-0.238165	-0.331591	-1.17195	-1.05585	0.409393	-1.48427	-0.888617	-0.431449	-1.08373	-0.188302	-0.154713	-1.01249	-0.444498	-1.13515	-0.193709	-1.26154	0.139538	-1.97344	-1.51028	-1.00707	-1.38158	-1.07571	-1.26538	0.0160496
SLC25A3	Q8NCF7;B2RE88;A0A024RBE8;A0A024RBH9;Q00325;F8VVM2;Q53HC3	Phosphate carrier protein, mitochondrial	-0.253054	-0.6977	-0.661487	-0.122083	0.0399639	-0.664888	-0.567364	-0.504985	-0.462949	-0.37015	-0.253569	-0.16993	0.0752485	-0.552848	0.0405639	-0.0615893	-0.132847	-0.465595	-0.345788	-0.162304	-0.52341	-0.461095	-0.334305	-0.462245	-0.114474	-0.757905	0.0480151	-0.757928	-0.357272	0.0258673	-0.530157	-0.705813	-0.0941176	-0.390336	-0.255676	-0.706271	-0.213167	0.00420893	-0.305813	-0.517004	-0.551144	-0.507475	-0.789331	0.14927	-0.63737	-0.380954
MRPL42	S4R360;J3KPP0;A0A024RBG3;S4R2Z7;Q9Y6G3	39S ribosomal protein L42, mitochondrial	NaN	NaN	NaN	NaN	NaN	NaN	NaN	NaN	NaN	NaN	NaN	NaN	NaN	NaN	NaN	NaN	NaN	NaN	NaN	NaN	NaN	NaN	NaN	NaN	NaN	NaN	NaN	NaN	NaN	NaN	NaN	NaN	NaN	NaN	NaN	NaN	NaN	NaN	NaN	NaN	NaN	NaN	NaN	NaN	NaN	NaN
CKAP4	A0A024RBH2;Q07065;B3KVX6;Q8TB01;Q6NWZ1	Cytoskeleton-associated protein 4	-0.161284	-0.930782	-0.713903	-0.812572	-0.649665	-1.12745	-1.2089	-0.710505	-0.789631	-0.398524	-0.265834	-0.0430513	-0.664083	-0.364907	-0.940628	-0.958806	-0.193907	-0.941345	-0.533448	-0.679292	-0.742935	0.307291	-0.627861	-1.19092	-1.17998	-0.925292	-0.748258	-0.72914	-0.471866	-0.778698	-0.609382	-0.249409	-0.511674	-0.907899	-0.403888	-0.883138	-0.14647	-0.490231	-0.482196	-1.04164	-0.349439	-0.356023	-1.47211	-0.250659	-0.610747	-0.211438
TMPO	A0A024RBH7;Q59G12		NaN	-0.682843	NaN	-0.613249	-2.18152	NaN	NaN	NaN	NaN	NaN	NaN	NaN	-3.86542	NaN	NaN	NaN	NaN	NaN	NaN	NaN	-1.3104	-2.85665	NaN	NaN	NaN	NaN	-1.74666	NaN	NaN	NaN	NaN	NaN	-3.61318	NaN	NaN	NaN	NaN	NaN	NaN	NaN	NaN	NaN	NaN	NaN	NaN	-3.06172
CORO1C	Q53G58;B3KN06;A0A024RBI5;Q59EA2;Q9ULV4;B4DMH3;B4E3S0;B7Z9V0	Coronin;Coronin-1C	-1.79514	-1.25888	NaN	-3.56291	-0.404249	-0.0945816	1.98862	NaN	-1.21798	0.938784	0.592824	0.613974	-0.624148	NaN	0.524043	NaN	NaN	-1.25829	1.14794	0.927068	NaN	-0.0799754	0.00527021	NaN	NaN	0.795934	1.24315	-0.0364681	1.07033	NaN	NaN	0.542485	0.644822	-0.248778	-0.816441	0.267261	NaN	NaN	NaN	-0.522056	-0.677387	-0.720629	NaN	NaN	-1.74442	NaN
RPL6	Q8TBK5;Q8N5Z7;A0A024RBK3;Q9HBB3;Q02878;B4DRX3	60S ribosomal protein L6	-0.424894	-1.16858	-0.578807	-0.499916	-0.569325	-0.596485	-0.733845	-0.367885	-0.158909	-0.36462	-0.39711	-0.807647	-0.920177	-0.620836	-0.325607	-0.942678	0.219353	-0.14526	-0.505432	-0.482881	-0.341804	-0.461511	-1.24273	-0.802525	-1.13402	-0.645493	-0.389265	-0.354939	-0.809289	-0.604321	-1.19793	-0.710135	-0.365941	-0.725619	-0.802569	-0.996779	-0.613892	-1.15863	-0.284626	-0.975243	-0.730745	-0.705326	-0.598271	-0.938803	-0.826417	-0.760394
TRAFD1	A0A024RBK4;O14545;F8VWK2;F8VVF3;F8VNX8	TRAF-type zinc finger domain-containing protein 1	NaN	NaN	NaN	NaN	NaN	NaN	NaN	NaN	NaN	NaN	NaN	NaN	NaN	NaN	NaN	NaN	NaN	NaN	NaN	NaN	NaN	NaN	NaN	NaN	NaN	NaN	NaN	NaN	NaN	NaN	NaN	NaN	NaN	NaN	NaN	NaN	NaN	NaN	NaN	NaN	NaN	NaN	NaN	NaN	NaN	NaN
PPP1CC	Q9UPN1;F8VYE8;A0A024RBP2;P36873;F8VR82;F8W0W8;A0A087WYY5	Serine/threonine-protein phosphatase;Serine/threonine-protein phosphatase PP1-gamma catalytic subunit	-0.219958	NaN	-2.44109	-1.25816	NaN	-0.5065	-1.3454	-1.59194	NaN	NaN	-1.07142	NaN	-1.74394	NaN	-2.26183	-1.37896	NaN	-0.724738	-1.48249	-1.0719	-1.92211	-2.37873	-0.702465	-0.546363	NaN	-2.14468	-1.08794	-2.07423	-1.09653	NaN	-1.72657	NaN	-0.367595	NaN	NaN	-1.87551	NaN	-1.84234	-0.961475	NaN	NaN	-1.8496	-1.19346	NaN	NaN	NaN
RSN;CLIP1	A0A024RBR1;P30622;J3KP58;F5H0N7;Q59GJ4;F5H6A0	CAP-Gly domain-containing linker protein 1	NaN	0.962379	1.11866	NaN	NaN	NaN	NaN	NaN	NaN	NaN	NaN	2.2887	NaN	NaN	NaN	NaN	NaN	NaN	NaN	NaN	NaN	NaN	1.75049	NaN	NaN	NaN	NaN	NaN	NaN	NaN	NaN	NaN	NaN	NaN	NaN	NaN	NaN	NaN	NaN	NaN	NaN	NaN	NaN	NaN	NaN	NaN
DENR	A0A024RBR3;O43583;F8VVL1	Density-regulated protein	NaN	NaN	NaN	NaN	NaN	NaN	NaN	NaN	1.79681	NaN	NaN	NaN	NaN	NaN	NaN	NaN	NaN	NaN	NaN	NaN	NaN	NaN	NaN	NaN	NaN	NaN	NaN	NaN	-0.289362	NaN	NaN	NaN	NaN	0.782422	NaN	NaN	NaN	NaN	NaN	NaN	NaN	NaN	-0.697418	-0.921436	NaN	-1.9514
RPLP0;RPLP0P6	A8K4Z4;A0A024RBS2;P05388;Q6NSF2;F8VWS0;Q53HW2;Q53HK9;F8VU65;F8VPE8;G3V210;F8VW21;F8VQY6;F8VRK7;F8VZS0;B4E3D5;Q8NHW5;F8VS58	60S acidic ribosomal protein P0;60S acidic ribosomal protein P0-like	0.258328	-0.110676	-0.636745	-0.202208	0.203561	-0.66758	-0.0918672	-1.12785	-0.536617	-2.54884e-05	-0.392941	-0.067568	-0.297756	-0.159021	-0.0791157	-0.541566	-0.340113	-0.56877	-0.55881	-0.450662	-1.29716	0.0258617	-0.306672	-0.962132	-0.748431	-1.13471	-0.456175	-1.0599	-0.961908	-0.707331	-1.23698	-0.636518	-0.964234	-0.778086	-0.466105	-1.13104	-0.5658	-1.05041	-1.23115	-1.16986	-0.918364	-0.614129	-1.17252	-1.10849	-0.853532	-0.645535
VPS37B	A0A024RBU0;Q9H9H4;F5H4M0;F5H1F6	Vacuolar protein sorting-associated protein 37B	NaN	NaN	NaN	NaN	NaN	NaN	NaN	NaN	NaN	NaN	NaN	NaN	NaN	NaN	NaN	NaN	NaN	NaN	NaN	NaN	NaN	NaN	NaN	NaN	NaN	NaN	NaN	NaN	NaN	NaN	NaN	NaN	NaN	NaN	NaN	NaN	NaN	NaN	NaN	NaN	NaN	NaN	NaN	NaN	NaN	NaN
PNPLA4	A0A024RBU8;P41247;C9IZF6	Patatin-like phospholipase domain-containing protein 4	NaN	NaN	NaN	NaN	NaN	NaN	NaN	-1.09768	NaN	NaN	NaN	NaN	NaN	NaN	NaN	NaN	NaN	NaN	NaN	NaN	NaN	NaN	NaN	NaN	NaN	-1.53874	NaN	NaN	NaN	NaN	NaN	1.61533	NaN	NaN	NaN	NaN	NaN	NaN	-0.462367	NaN	-2.30514	0.0498751	-3.95513	NaN	NaN	NaN
MID1	B4DLX8;A8K5A0;A0A024RBV4;O15344;C9J453;B7Z5K6;A0A087X255	E3 ubiquitin-protein ligase Midline-1	NaN	0.631422	NaN	NaN	NaN	1.34326	1.76195	NaN	NaN	0.838512	NaN	1.15146	NaN	NaN	NaN	NaN	NaN	NaN	NaN	NaN	NaN	NaN	NaN	NaN	NaN	NaN	NaN	NaN	NaN	NaN	NaN	NaN	NaN	NaN	NaN	NaN	NaN	NaN	NaN	NaN	NaN	NaN	NaN	NaN	NaN	NaN
RAB9A	A0A024RBV5;P51151	Ras-related protein Rab-9A	NaN	NaN	NaN	NaN	NaN	NaN	NaN	NaN	NaN	NaN	NaN	NaN	NaN	NaN	NaN	NaN	NaN	NaN	NaN	NaN	NaN	NaN	0.498179	NaN	NaN	NaN	NaN	NaN	NaN	NaN	NaN	NaN	NaN	NaN	NaN	NaN	-1.64293	NaN	-0.690462	NaN	NaN	NaN	NaN	NaN	NaN	NaN
AP1S2;DKFZp779P0659	Q549M9;A0A024RBX8;P56377;Q7Z677;H7BZG6;B7Z853;H0Y673;F6SFB5;A6NH01;B7Z3M9;B4DIM6	AP-1 complex subunit sigma-2	NaN	NaN	NaN	NaN	NaN	NaN	NaN	NaN	NaN	NaN	NaN	NaN	NaN	NaN	NaN	NaN	NaN	NaN	NaN	NaN	NaN	NaN	NaN	NaN	NaN	NaN	NaN	NaN	NaN	NaN	NaN	NaN	NaN	NaN	NaN	NaN	NaN	NaN	NaN	NaN	NaN	NaN	NaN	NaN	NaN	NaN
PDHA1;PDHA1/LOC79064	A0A024RBX9;P08559;Q53GE3;A5YPB6;A5PHJ9	Pyruvate dehydrogenase E1 component subunit alpha;Pyruvate dehydrogenase E1 component subunit alpha, somatic form, mitochondrial	0.473294	-0.758954	0.183221	0.121659	-1.70421	0.347526	-0.168539	-0.101706	-0.253361	0.251478	0.42744	-0.181114	-1.05936	-0.0266002	0.158724	0.359873	-0.105863	-0.14798	0.624923	0.462158	0.675158	0.636509	0.277689	-0.21181	0.417297	0.0783379	-0.845442	0.290133	0.365203	0.807491	0.263293	-0.244991	-0.230099	0.379238	0.112824	0.500456	0.177648	0.398012	0.919762	0.119554	-0.0617504	0.37123	-0.197718	-0.0462425	0.682627	0.469741
SMPX	A0A024RBY1;Q9UHP9	Small muscular protein	NaN	NaN	-0.662935	NaN	NaN	0.94461	NaN	-1.08529	NaN	NaN	NaN	-2.72004	-0.85191	NaN	NaN	-3.72966	NaN	NaN	NaN	NaN	NaN	-0.78073	NaN	0.635428	NaN	NaN	NaN	NaN	NaN	NaN	NaN	NaN	NaN	NaN	NaN	NaN	NaN	NaN	NaN	NaN	NaN	NaN	-2.16996	NaN	NaN	NaN
TMEM47	A0A024RBY7;Q9BQJ4	Transmembrane protein 47	NaN	NaN	NaN	NaN	NaN	NaN	NaN	NaN	NaN	NaN	NaN	NaN	0.0859713	0.657718	NaN	-0.908352	0.48342	NaN	NaN	NaN	NaN	NaN	-0.0872422	NaN	NaN	NaN	NaN	-0.721188	NaN	-1.34772	-0.571822	NaN	-2.43928	-0.943584	NaN	NaN	NaN	NaN	0.531406	NaN	NaN	NaN	NaN	NaN	NaN	NaN
DKFZp779I1858;HCCS	Q68D50;A0A024RBY9;P53701	Cytochrome c-type heme lyase	NaN	NaN	NaN	NaN	NaN	NaN	NaN	NaN	NaN	NaN	NaN	-1.15095	-1.57614	NaN	-1.01436	-2.77205	NaN	NaN	NaN	NaN	NaN	NaN	-0.360645	NaN	NaN	NaN	NaN	NaN	NaN	NaN	NaN	NaN	NaN	NaN	NaN	NaN	NaN	NaN	NaN	NaN	NaN	NaN	NaN	NaN	NaN	NaN
CTPS2	A0A024RC00;Q9NRF8	CTP synthase;CTP synthase 2	NaN	2.86628	NaN	-0.62966	0.71	0.567041	-1.32683	-0.86576	NaN	NaN	0.460112	0.0884541	-0.673556	NaN	NaN	NaN	0.0337764	NaN	-0.697713	-0.921589	0.996455	NaN	-0.59705	-0.950692	NaN	-0.249991	0.388569	NaN	-1.19005	0.760749	-1.22885	0.140539	NaN	-0.288536	-0.548437	-0.10044	0.244771	-1.12869	0.218128	-1.29408	-1.75924	-1.42879	-2.41552	-1.29954	-1.71407	NaN
MAPRE2	A0A024RC33;Q15555	Microtubule-associated protein RP/EB family member 2	0.633543	1.04163	0.693295	0.468135	-2.05179	0.12341	-0.77273	-0.443146	0.314445	0.132177	0.0459225	-0.745855	NaN	0.28546	0.244766	0.5742	0.0218191	0.264599	-0.141473	0.663872	-0.346191	-0.144438	0.30308	0.535655	0.308507	0.315104	NaN	1.78641	-2.09399	0.272663	-0.0419	-0.558877	NaN	-0.134072	0.44908	-1.11205	-0.95232	-0.761541	-0.997278	-0.908676	-1.50819	-1.26324	-1.14737	-1.67794	NaN	-1.35569
P15RS;RPRD1A	A0A024RC37;Q96P16;A0A0C4DGQ6;K7EP82	Regulation of nuclear pre-mRNA domain-containing protein 1A	NaN	NaN	NaN	NaN	NaN	NaN	NaN	NaN	NaN	NaN	NaN	NaN	NaN	NaN	NaN	NaN	NaN	NaN	NaN	NaN	NaN	NaN	NaN	NaN	NaN	NaN	NaN	NaN	NaN	NaN	NaN	NaN	NaN	NaN	NaN	NaN	NaN	NaN	NaN	NaN	NaN	NaN	NaN	NaN	NaN	NaN
CDH2	A0A024RC42;P19022	Cadherin-2	-1.29233	-1.17118	-1.27554	-0.973718	-1.85881	-1.26972	-0.812593	-1.16071	-1.24486	-1.39917	-0.631332	-1.23178	-0.914886	-1.34746	-1.24677	-2.44269	-1.38715	-3.2553	-1.03998	-0.760051	-0.49358	-1.10184	-0.908353	-1.21594	-0.34878	-1.24096	-1.32171	-1.35258	-2.19019	-1.36385	-1.60079	-2.85551	-1.47966	-0.990701	-1.57405	-0.681573	-1.79266	-0.662876	-1.57008	-1.02402	-0.550907	-1.4017	-1.42871	-1.41607	-1.03919	-1.40342
MFGE8	B3KTQ2;A0A024RC55;Q08431;A0A024RC59;F5GZN3;B4E396	Lactadherin;Lactadherin short form;Medin	-1.05995	-0.536534	-0.832317	-0.780333	-0.166408	-1.19706	-0.55682	-0.734505	-1.9541	-0.693758	0.433018	-0.443448	-0.0805014	-0.857655	-1.66088	-1.38311	-1.13686	-1.05331	-0.671593	-0.791518	-0.295762	-1.20939	-0.783735	-0.830105	-1.28684	-1.30386	-0.521588	-1.02025	-0.920206	-1.01789	-1.11863	-0.873726	-1.14673	-0.894826	-0.880273	-1.11999	-1.29103	-0.565794	-0.682611	-1.44682	-1.28616	-0.972123	-1.11688	-0.360975	-1.45841	-1.32723
IQGAP1;hCG_1991735	A4QPB0;A0A024RC65;P46940;Q6P1N4;A0A0J9YXZ5;H0YLE8;B4E2M0	Ras GTPase-activating-like protein IQGAP1	NaN	NaN	NaN	NaN	NaN	NaN	NaN	NaN	NaN	NaN	NaN	NaN	NaN	NaN	NaN	NaN	NaN	NaN	2.05233	NaN	NaN	NaN	NaN	NaN	NaN	0.710968	NaN	NaN	NaN	NaN	NaN	NaN	NaN	NaN	NaN	NaN	NaN	NaN	NaN	NaN	NaN	2.41196	NaN	NaN	NaN	NaN
SEC11A;SPC18;SEC11L1	H0YNG3;Q6IAM7;A0A024RC78;P67812;H0YKT4	Signal peptidase complex catalytic subunit SEC11;Signal peptidase complex catalytic subunit SEC11A	NaN	NaN	NaN	NaN	NaN	NaN	NaN	NaN	NaN	NaN	-0.522759	NaN	NaN	NaN	NaN	NaN	NaN	NaN	NaN	NaN	NaN	NaN	NaN	NaN	NaN	NaN	NaN	NaN	NaN	NaN	NaN	NaN	NaN	NaN	NaN	NaN	NaN	NaN	NaN	-0.711671	-1.08149	NaN	NaN	-0.88096	NaN	NaN
RPLP2	A0A024RCA7;P05387	60S acidic ribosomal protein P2	-1.20365	0.0906437	-1.09588	-0.722641	0.543106	-1.18232	-0.493337	-1.19803	-0.447965	-0.621917	-0.490934	-0.337036	-0.137241	-0.566243	-0.853663	-1.33926	-0.557864	0.127482	-0.143821	-1.16532	-1.48628	-0.670517	-0.523936	-0.0362278	-1.0857	-1.16133	-0.20521	-0.819656	-1.22382	-1.39928	-1.27337	-0.682994	-0.633642	-0.946056	-1.08122	-1.63283	-0.635617	-1.52628	-0.83624	-0.876733	-0.72681	-1.24924	-1.23489	-0.913843	-0.073606	-0.313943
CD151	E9PMR4;A0A024RCB3;P48509;E9PRJ3;Q53FU5	Tetraspanin;CD151 antigen	0.486772	NaN	NaN	0.639069	NaN	-0.474358	0.0301478	0.0118353	0.513502	1.19611	0.702327	NaN	NaN	-0.0319597	0.983932	NaN	0.980455	0.461204	-1.42986	NaN	-0.807323	1.0558	NaN	NaN	NaN	0.210045	NaN	-1.02694	NaN	0.382777	-0.0873271	3.73535	NaN	0.306746	NaN	0.567596	NaN	NaN	NaN	NaN	1.26757	0.0884906	0.72965	0.201288	0.0932941	NaN
CHID1	A0A024RCB5;B7Z705;B4DN31;Q9BWS9;E9PI70;E9PIP0;E9PRL3;E9PPH0;E9PPA0;E9PKF1	Chitinase domain-containing protein 1	NaN	NaN	NaN	NaN	NaN	NaN	NaN	NaN	NaN	NaN	NaN	NaN	NaN	0.523276	NaN	NaN	NaN	NaN	NaN	NaN	NaN	NaN	NaN	NaN	NaN	NaN	NaN	NaN	NaN	NaN	NaN	NaN	NaN	NaN	NaN	NaN	NaN	NaN	NaN	NaN	NaN	NaN	NaN	NaN	NaN	NaN
CD81	E9PJK1;E9PRJ8;H0YDL9;H0YDJ9;A0A024RCB7;E9PIF1;A6NMH8;P60033	Tetraspanin;CD81 antigen	-0.0102069	0.221996	NaN	NaN	0.592267	NaN	NaN	NaN	1.24305	0.254238	0.310504	1.13568	0.0639519	-1.0844	NaN	NaN	NaN	0.722444	-0.601168	-0.0210533	NaN	NaN	-0.230796	-0.385155	NaN	-0.791195	-1.02084	-0.355355	-0.70496	NaN	-0.178746	0.232787	0.114691	-0.0270744	0.0150681	-0.141302	NaN	NaN	-0.238909	NaN	NaN	-0.609282	NaN	-0.498149	NaN	NaN
NAP1L4	A0A024RCC9;B7ZAK9;B7ZB83;B4DS05;Q99733;B7ZAC7;C9J6D1;C9JZI7;E9PNW0;E9PJJ2;E9PS34;E9PNJ7;A8MXH2;E9PKT8	Nucleosome assembly protein 1-like 4	-0.88821	-0.47437	-0.446167	-1.14343	-0.466653	-1.46949	-0.647839	-0.0349378	-0.243909	-0.713448	-0.673138	-0.15019	-0.283926	-1.36113	-0.561216	-1.04893	-0.201387	-0.366451	-0.767975	-0.889775	-0.40843	-0.0349658	-0.134039	-0.226806	-0.717757	-0.89968	-0.251849	-0.634434	-0.446063	-0.538276	-0.724314	-0.34108	-0.388388	-0.780119	-0.499596	-0.75009	-0.186536	-0.249869	-0.272239	-1.04901	-0.724549	-0.498962	-1.03082	-0.880622	-0.720767	-0.595425
ARMCX3	A8K5B0;A0A024RCF9;Q9UH62	Armadillo repeat-containing X-linked protein 3	NaN	NaN	NaN	NaN	NaN	NaN	NaN	NaN	NaN	NaN	NaN	NaN	NaN	NaN	NaN	NaN	NaN	NaN	NaN	NaN	NaN	NaN	NaN	NaN	NaN	NaN	NaN	NaN	NaN	NaN	NaN	NaN	NaN	NaN	NaN	NaN	NaN	NaN	NaN	NaN	NaN	NaN	NaN	NaN	NaN	NaN
CARS	A8K067;B4DI19;Q53HG6;A8MVQ3;B4DKY1;A0A024RCG3;P49589;B4DPV7	Cysteine--tRNA ligase, cytoplasmic	NaN	NaN	NaN	NaN	NaN	NaN	NaN	NaN	NaN	NaN	0.262452	NaN	NaN	NaN	NaN	NaN	NaN	NaN	NaN	NaN	NaN	NaN	NaN	NaN	NaN	NaN	NaN	NaN	NaN	NaN	NaN	NaN	NaN	NaN	NaN	NaN	NaN	NaN	NaN	NaN	NaN	NaN	NaN	NaN	NaN	NaN
ARMCX2	A8K5M7;A0A024RCG7;Q7L311	Armadillo repeat-containing X-linked protein 2	NaN	0.712953	NaN	NaN	NaN	NaN	NaN	NaN	NaN	NaN	0.873711	NaN	NaN	NaN	1.46919	1.11042	NaN	0.406809	NaN	NaN	NaN	NaN	NaN	0.841917	NaN	NaN	2.19608	NaN	NaN	NaN	NaN	NaN	-0.54962	0.146977	NaN	-1.19346	2.30579	NaN	NaN	NaN	NaN	0.298371	NaN	NaN	NaN	NaN
ARMCX1	A0A024RCI6;Q9P291	Armadillo repeat-containing X-linked protein 1	3.04997	2.66969	-0.195977	0.00076583	2.78916	0.499198	NaN	2.55237	-1.02105	0.632517	1.2876	4.59328	1.16009	-0.50853	1.35655	0.233945	NaN	-0.46048	0.97548	1.00751	3.21934	2.60342	1.1691	NaN	NaN	NaN	0.0818428	1.75828	-0.141433	NaN	0.098969	-0.575312	1.25174	0.248348	-1.1428	1.07184	NaN	NaN	-0.171719	0.161946	1.84578	2.54658	1.95277	NaN	-0.582652	-0.45133
hCG_2005638;DDX39B	A0A024RCM3;Q13838;A0A0G2JJZ9;Q5STU3;B4DP52;A0A140T9X3;F6WLT2;A0A140T9X9;A0A140T996;F6UJC5;A0A140TA18;A0A0A0MT12;F6TRA5	Spliceosome RNA helicase DDX39B	-0.290581	-0.389517	-0.828524	-0.940811	-0.504059	-1.66924	-0.467661	-0.893973	-1.0033	-0.699137	-0.463532	-0.796496	-0.661275	-0.556821	-0.916011	-0.984711	-0.293319	-0.923757	-0.649474	-0.630325	-0.84905	-0.640887	-0.820121	-1.35436	-1.15037	-1.28031	-0.592738	-1.42813	-0.632476	-1.10498	-1.18096	-0.729071	-0.956903	-1.14623	-0.927107	-1.42042	-0.903259	-1.23518	-0.837303	-1.25175	-1.01247	-0.761202	-1.00565	-0.964465	-1.16795	-0.930447
VARS	A0A024RCN6;P26640;A0A140T936	Valine--tRNA ligase	0.41236	0.244301	-0.868924	0.223295	1.05335	-0.0935127	1.02873	0.561494	0.887553	-0.0445468	0.725776	1.11868	-0.0946814	0.331843	-0.0647653	0.00266524	1.21366	0.0328368	0.537966	0.775684	0.0544672	0.829935	0.40126	0.327331	-0.849999	-0.237686	-0.380212	-0.709472	0.00707211	NaN	-0.678653	-0.408625	0.481199	-0.146264	0.281939	-0.104738	-0.16954	-0.637357	-0.205073	-0.41543	-0.209041	0.573227	0.322253	0.338716	0.279967	0.608866
BAT3;BAG6	A0A024RCR6;A0A0G2JK23;P46379;A0A0G2JL47	Large proline-rich protein BAG6	-0.664938	0.237395	-0.174849	-1.07149	-0.424062	-0.452672	0.959879	-0.491655	NaN	NaN	-0.297666	0.603994	-0.316725	0.382956	NaN	-0.55031	NaN	NaN	-0.523261	2.20038	NaN	NaN	NaN	-1.09861	-1.56706	-1.16511	1.14098	-1.6319	NaN	-0.400101	-1.94298	NaN	NaN	-2.38446	-1.60644	NaN	NaN	-2.41687	NaN	-1.03203	-1.51765	NaN	-1.97517	-0.965325	NaN	NaN
HMGA1	B4DWA0;A0A024RCT9;P17096	High mobility group protein HMG-I/HMG-Y	NaN	-0.653519	NaN	0.199253	-0.945623	-0.198515	NaN	-0.428194	NaN	NaN	-0.110457	-0.0709388	-0.34115	NaN	NaN	NaN	NaN	NaN	-0.389016	0.396156	NaN	NaN	0.333134	NaN	NaN	0.347722	-0.279293	NaN	NaN	NaN	0.766995	NaN	NaN	0.609552	0.282123	NaN	NaN	NaN	NaN	NaN	NaN	NaN	NaN	NaN	NaN	NaN
AGPAT1	Q9HBM8;Q71VH6;B4DRH1;A0A024RCV5;Q99943;B3KPH3	1-acyl-sn-glycerol-3-phosphate acyltransferase;1-acyl-sn-glycerol-3-phosphate acyltransferase alpha	NaN	NaN	NaN	NaN	NaN	NaN	NaN	NaN	NaN	NaN	NaN	NaN	NaN	NaN	NaN	NaN	NaN	NaN	NaN	NaN	NaN	NaN	NaN	NaN	NaN	NaN	NaN	NaN	NaN	NaN	NaN	NaN	NaN	NaN	NaN	NaN	NaN	NaN	NaN	NaN	NaN	NaN	NaN	NaN	NaN	NaN
PIG60;MTCH1	A8YXX5;Q9Y374;A4FVA6;A0A024RD08;A0A024RCX4;Q9NZJ7;H0Y8C3;Q8IW90	Mitochondrial carrier homolog 1	-0.581933	-0.29901	-0.757791	NaN	NaN	-0.434893	-0.734791	-0.346558	-1.07765	-0.57056	-0.511063	-0.44156	-1.08366	-0.90134	-1.51379	0.0622639	-1.35366	NaN	NaN	-0.134582	NaN	-0.810129	-0.797428	-0.529271	-1.30677	-1.17402	-0.301002	-0.633478	-1.36519	NaN	-1.55974	-0.938747	-0.985792	NaN	-1.03415	-1.19963	-1.35172	-1.51	-0.608624	NaN	-1.09343	-0.500392	0.638704	-0.707702	NaN	-0.786596
SLC39A7	B4DZZ8;B4DVK8;A0A024RCX7;Q92504	Zinc transporter SLC39A7	NaN	-1.69604	-2.76033	NaN	NaN	NaN	NaN	NaN	NaN	NaN	NaN	NaN	-2.46038	-3.19691	-2.77172	-2.57367	-2.60947	-3.02586	-2.9286	-3.35333	-3.21934	NaN	NaN	-3.79061	NaN	-3.32351	-3.53045	-3.09769	-2.39751	NaN	-4.30078	-2.23693	-2.42433	-3.07974	-3.22495	NaN	-2.62975	NaN	-2.44138	-3.96597	NaN	-2.87242	NaN	-2.91409	NaN	NaN
PPIL1	A0A024RCX8;Q9Y3C6	Peptidyl-prolyl cis-trans isomerase;Peptidyl-prolyl cis-trans isomerase-like 1	NaN	-0.799585	NaN	NaN	-0.898866	NaN	-1.76099	NaN	NaN	NaN	0.251213	NaN	NaN	-1.39616	NaN	NaN	NaN	NaN	NaN	-1.34437	NaN	NaN	-2.19456	NaN	NaN	NaN	-1.734	NaN	NaN	NaN	NaN	-0.848958	NaN	-1.28676	-2.1552	NaN	NaN	NaN	-1.01414	NaN	NaN	NaN	NaN	NaN	NaN	NaN
VPS52	B4DS44;A0A024RCY1;Q4VXZ2;Q8N1B4;B3KMF7;A0A024RCT2;B4E225;B4DTZ4	Vacuolar protein sorting-associated protein 52 homolog	NaN	NaN	NaN	NaN	NaN	NaN	NaN	NaN	NaN	NaN	NaN	NaN	NaN	NaN	NaN	NaN	NaN	NaN	NaN	NaN	NaN	NaN	NaN	NaN	NaN	NaN	NaN	NaN	NaN	NaN	NaN	NaN	NaN	NaN	NaN	NaN	NaN	NaN	NaN	NaN	NaN	NaN	NaN	NaN	NaN	NaN
TFEB	B1AKB5;A0A024RCY3;B4DPL3;B0QYS6;B0QYS7;P19484	Transcription factor EB	NaN	NaN	NaN	NaN	NaN	NaN	NaN	NaN	NaN	NaN	NaN	NaN	NaN	NaN	NaN	NaN	NaN	NaN	NaN	NaN	NaN	NaN	NaN	NaN	NaN	NaN	NaN	NaN	NaN	NaN	NaN	NaN	NaN	NaN	NaN	NaN	NaN	NaN	NaN	NaN	NaN	NaN	NaN	NaN	NaN	NaN
LEMD2	A0A024RCZ1;Q8NC56	LEM domain-containing protein 2	-0.36233	0.00668335	-0.413594	-0.372252	0.413855	0.549029	1.79376	NaN	-1.60848	0.0639153	-0.250962	0.584654	0.156138	0.00631837	-0.0298416	-0.197852	-0.0539273	-0.205384	-0.0725242	-0.634936	-0.225645	0.585666	-0.325653	-0.272768	-0.362603	-0.879455	0.29669	-0.39963	-0.492939	-0.485684	-0.514278	-0.526658	-0.605351	-0.528498	-0.987466	-0.959182	-0.523321	-0.561892	-0.979221	-0.896567	-0.559247	NaN	NaN	NaN	NaN	-0.270944
KLC4	A0A024RCZ8;Q9NSK0;C9J8T5	Kinesin light chain 4	NaN	NaN	NaN	NaN	NaN	NaN	NaN	NaN	NaN	-1.08366	NaN	NaN	NaN	0.931178	NaN	NaN	1.57648	NaN	NaN	NaN	NaN	NaN	2.37437	1.00488	NaN	NaN	NaN	NaN	NaN	NaN	NaN	NaN	0.782943	NaN	NaN	NaN	NaN	NaN	1.41662	NaN	NaN	NaN	NaN	NaN	NaN	NaN
MRPS10	B4DP77;A0A024RD03;P82664;Q9BZS5	28S ribosomal protein S10, mitochondrial	NaN	NaN	NaN	NaN	NaN	NaN	NaN	NaN	NaN	NaN	NaN	NaN	NaN	NaN	NaN	NaN	NaN	NaN	NaN	NaN	NaN	NaN	NaN	NaN	NaN	NaN	NaN	NaN	NaN	NaN	NaN	NaN	NaN	NaN	NaN	NaN	NaN	NaN	NaN	NaN	NaN	NaN	NaN	NaN	NaN	NaN
TNRC5;CNPY3	A0A024RD07;Q9BT09;A0A0C4DFY8;A0A024RCZ2	Protein canopy homolog 3	NaN	NaN	NaN	NaN	NaN	NaN	NaN	NaN	NaN	NaN	NaN	NaN	NaN	NaN	NaN	NaN	NaN	NaN	NaN	NaN	NaN	NaN	NaN	NaN	NaN	NaN	NaN	NaN	NaN	NaN	NaN	NaN	NaN	NaN	NaN	NaN	NaN	NaN	NaN	NaN	NaN	NaN	NaN	NaN	NaN	NaN
PPP2R5D	E9PFR3;A0A024RD11;Q14738;B4DSD7;A8K6Y2;Q59EF0;H0Y8C4	Serine/threonine-protein phosphatase 2A 56 kDa regulatory subunit delta isoform	NaN	1.32362	NaN	NaN	1.22857	0.73889	NaN	0.331608	NaN	NaN	NaN	NaN	NaN	NaN	0.808437	NaN	1.1504	NaN	0.758233	NaN	NaN	NaN	NaN	NaN	NaN	NaN	NaN	NaN	NaN	NaN	NaN	-0.254957	3.6236	0.425889	NaN	NaN	NaN	0.49218	NaN	NaN	-0.624429	NaN	0.0517579	NaN	NaN	-0.270469
MAPK14	A0A024RD15;Q16539;B4E0K5;B5TY33	Mitogen-activated protein kinase;Mitogen-activated protein kinase 14	-1.2853	NaN	-1.09909	-0.751549	NaN	-0.619178	NaN	-0.838404	NaN	-2.16215	-0.481919	0.557858	0.964517	NaN	-0.840201	NaN	NaN	0.458227	NaN	0.527013	-0.361207	NaN	NaN	0.166066	-0.508733	0.221926	NaN	NaN	NaN	-0.995665	NaN	NaN	NaN	-0.928806	NaN	-0.00173015	NaN	-0.620305	0.559515	-1.6698	NaN	0.144074	NaN	NaN	NaN	-1.46022
STK38	B2R6F9;A0A024RD18;Q15208;Q9UPD3	Serine/threonine-protein kinase 38	NaN	NaN	NaN	NaN	NaN	NaN	NaN	NaN	NaN	NaN	NaN	NaN	NaN	NaN	NaN	NaN	NaN	NaN	NaN	NaN	NaN	NaN	NaN	NaN	NaN	NaN	NaN	NaN	NaN	NaN	NaN	NaN	NaN	NaN	NaN	NaN	NaN	NaN	NaN	NaN	NaN	NaN	NaN	NaN	NaN	NaN
NFYA	A0A0U4C5A9;A0A024RD22;K9JA49;P23511	Nuclear transcription factor Y subunit alpha	NaN	NaN	NaN	NaN	NaN	NaN	NaN	NaN	NaN	NaN	NaN	NaN	NaN	NaN	NaN	NaN	NaN	NaN	NaN	NaN	NaN	NaN	NaN	NaN	NaN	NaN	NaN	NaN	NaN	NaN	NaN	NaN	NaN	NaN	NaN	NaN	NaN	NaN	NaN	NaN	NaN	NaN	NaN	NaN	NaN	NaN
RAB23	A0A024RD41;Q9ULC3	Ras-related protein Rab-23	NaN	NaN	NaN	NaN	NaN	NaN	NaN	NaN	NaN	NaN	NaN	NaN	NaN	NaN	NaN	NaN	NaN	NaN	NaN	NaN	NaN	NaN	NaN	NaN	NaN	NaN	NaN	NaN	NaN	-0.137372	NaN	NaN	NaN	NaN	NaN	NaN	NaN	NaN	NaN	NaN	NaN	NaN	NaN	NaN	NaN	NaN
NCOR1	A0A088AWL3;A0A024RD47;O75376;Q7Z516;Q6PGR4;Q6NTH1;Q6PDT8;E7EVU5;Q05CG3;E7EW50;J3KS51;Q86W52;A5PKW7	Nuclear receptor corepressor 1	NaN	NaN	NaN	NaN	NaN	NaN	NaN	NaN	NaN	NaN	NaN	NaN	NaN	NaN	NaN	NaN	NaN	NaN	NaN	NaN	NaN	NaN	NaN	NaN	NaN	NaN	NaN	NaN	NaN	NaN	NaN	NaN	NaN	NaN	NaN	NaN	NaN	NaN	NaN	NaN	NaN	NaN	NaN	NaN	NaN	NaN
MRPL14	A0A024RD78;Q6P1L8	39S ribosomal protein L14, mitochondrial	NaN	0.400454	NaN	NaN	0.771618	NaN	NaN	NaN	NaN	NaN	NaN	NaN	0.244224	NaN	NaN	NaN	NaN	NaN	NaN	NaN	NaN	NaN	NaN	NaN	NaN	NaN	NaN	NaN	NaN	NaN	NaN	NaN	NaN	NaN	NaN	NaN	NaN	NaN	NaN	NaN	NaN	0.0557562	NaN	NaN	NaN	NaN
HSP90AB1	A0A024RD80;P08238;B4DMA2;B4DGL0	Heat shock protein HSP 90-beta	-0.605601	-0.507295	-1.15799	-0.675467	-0.663273	-0.792562	-0.408845	-0.597538	-0.849731	-0.629779	-0.614796	-0.227656	-0.905233	-0.681044	-0.524919	-0.703251	-0.766271	-0.701859	-0.332788	-0.473424	-1.03623	-0.702741	-0.470852	-0.729626	-0.461794	-0.806601	-0.560692	-0.4289	-0.0719744	-0.309643	-0.101863	-0.698016	-0.414654	-0.682745	-0.957132	-0.576445	-0.91489	-0.479993	-0.623141	-0.64016	-0.391551	-0.65697	-0.655813	-1.56776	-0.982153	-0.69113
MUT	A0A024RD82;P22033;T1WHH0;B2R6K1;A0A0S2Z4X4	Methylmalonyl-CoA mutase, mitochondrial	-0.183751	-0.234501	-0.392652	-0.165745	-0.151762	0.312361	0.378292	0.149096	-0.0603319	-0.826923	-0.0581562	0.513542	-0.718942	-0.018071	-0.127202	0.146119	-0.295008	-0.0145651	0.12433	0.0907785	0.0166467	0.307798	0.278319	-0.380461	-0.717545	0.238979	0.00947277	-0.99259	-0.0262483	0.245999	-0.335576	-0.203709	0.264882	-0.084608	-0.289122	-0.424607	NaN	-0.788651	-0.680194	-0.486448	0.110341	-0.435921	-0.563875	0.077315	-0.0783121	-0.0655522
TTC19	B3KT23;A0A024RD83;Q6DKK2;K7EKH7	Tetratricopeptide repeat protein 19, mitochondrial	NaN	NaN	NaN	NaN	NaN	NaN	NaN	NaN	NaN	NaN	NaN	NaN	NaN	NaN	NaN	NaN	NaN	NaN	NaN	NaN	NaN	NaN	NaN	NaN	NaN	NaN	NaN	NaN	NaN	NaN	NaN	NaN	NaN	NaN	NaN	NaN	NaN	NaN	NaN	NaN	NaN	NaN	NaN	NaN	NaN	NaN
PAICS	E9PBS1;A0A024RD93;P22234;B4DGX3;D6RF62	Multifunctional protein ADE2;Phosphoribosylaminoimidazole-succinocarboxamide synthase;Phosphoribosylaminoimidazole carboxylase	-0.0384534	0.0479166	-0.719299	0.251019	-0.376725	-0.126686	-0.218653	-0.180696	0.185716	-0.239392	-0.374732	-0.144661	-0.370836	0.017216	0.155898	-0.835474	-1.1905	-0.790024	-1.25485	-0.313882	-0.936988	0.277729	-0.25311	-0.240337	-0.655752	-1.61049	-1.07773	-0.79653	-0.344367	-0.792431	-0.711856	-0.630867	-0.49633	-0.584811	-0.718835	-1.22368	-0.634186	-0.934254	-0.102646	-1.31546	-0.619596	-0.627432	-1.58463	-1.07402	-0.855289	-0.617152
DKFZp781H1314;NBC;SLC4A4	Q68DB0;Q9Y6R3;A0A024RD97;A5JJ20;Q9Y6R1	Anion exchange protein;Electrogenic sodium bicarbonate cotransporter 1	NaN	NaN	NaN	NaN	NaN	NaN	NaN	NaN	NaN	NaN	NaN	NaN	NaN	NaN	NaN	NaN	NaN	NaN	NaN	NaN	NaN	NaN	NaN	NaN	NaN	NaN	NaN	NaN	NaN	NaN	NaN	NaN	NaN	NaN	NaN	NaN	NaN	NaN	NaN	NaN	NaN	NaN	NaN	NaN	NaN	NaN
GRSF1	A0A024RD99;B7Z2D8;B7Z5F9;B3KP14;H0Y8R1;F5H5I6;B7Z3R7;H0YAK1;B3KW50;Q12849	G-rich sequence factor 1	-0.0781998	-0.762391	0.342243	-0.732313	-0.117961	-0.428142	-1.27065	-1.21318	NaN	-0.00891703	-1.4417	NaN	-0.267476	-0.815656	-0.771971	-0.857901	-0.226015	0.22825	-0.675523	-0.845282	NaN	0.675904	NaN	NaN	-0.067501	-0.630993	NaN	NaN	-0.40523	-0.613154	0.0640576	-0.389567	NaN	NaN	NaN	-0.649294	NaN	-0.658554	NaN	-0.686971	NaN	-0.463309	NaN	NaN	-0.0984196	NaN
EXOC1	A0A024RDA1;A0A024RDA9;Q9NV70	Exocyst complex component 1	NaN	NaN	NaN	NaN	NaN	NaN	NaN	-0.0506062	NaN	NaN	NaN	NaN	NaN	NaN	NaN	NaN	0.533806	NaN	NaN	NaN	NaN	NaN	NaN	NaN	NaN	0.843603	NaN	NaN	NaN	-0.228111	NaN	NaN	NaN	NaN	NaN	NaN	NaN	NaN	NaN	NaN	NaN	NaN	NaN	NaN	NaN	NaN
IGFBP7	A0A024RDA6;Q16270	Insulin-like growth factor-binding protein 7	0.293943	NaN	NaN	NaN	NaN	NaN	NaN	NaN	NaN	NaN	NaN	NaN	NaN	NaN	NaN	NaN	NaN	NaN	NaN	NaN	NaN	NaN	NaN	NaN	NaN	NaN	NaN	NaN	NaN	NaN	NaN	NaN	NaN	NaN	NaN	NaN	NaN	NaN	NaN	NaN	NaN	NaN	NaN	NaN	NaN	NaN
UBE1L2;UBA6	A0A024RDB0;A0AVT1;B3KSS1	Ubiquitin-like modifier-activating enzyme 6	0.467953	0.483521	NaN	-0.873022	-0.0468402	-0.743386	1.09431	-0.245496	-1.17932	0.27147	-0.209872	NaN	-0.0867838	NaN	-0.805872	-2.91879	-0.0970714	-0.973134	-0.0104934	0.0822704	NaN	NaN	0.175336	-0.600435	-1.06053	NaN	-0.36291	-2.12032	-0.911557	-0.805257	-1.52348	-0.728668	-0.699738	-1.25295	-0.58445	-2.13478	-1.05302	-1.53481	-1.12476	-1.32677	-1.26767	-0.634129	-1.36114	0.223487	-1.13855	-0.230758
HNRPD;HNRNPD	Q12771;B4DTC3;A0A024RDB4;H0YA96;D6RF44;D6RBQ9;B4E0W4		NaN	NaN	NaN	-1.59345	NaN	NaN	NaN	NaN	NaN	NaN	NaN	NaN	NaN	NaN	NaN	NaN	NaN	NaN	NaN	NaN	NaN	NaN	NaN	NaN	NaN	NaN	NaN	NaN	NaN	NaN	NaN	NaN	NaN	NaN	NaN	NaN	NaN	NaN	NaN	NaN	NaN	NaN	NaN	NaN	NaN	NaN
SEC31L1;SEC31A	A0A024RDD3;D6REX3;O94979;A0A024RDH6;D6RHZ5;H7BXG7	Protein transport protein Sec31A	-0.473732	-0.435452	-1.22652	-0.762902	-0.228943	-1.1351	0.70805	-0.218368	-0.25213	-0.476921	0.35339	0.183221	-0.263307	-0.426389	-0.991264	-0.753819	-0.237206	0.519298	-0.717388	-0.143524	0.538183	0.466686	-0.133407	0.328889	-0.647245	-0.258986	-0.252537	-0.0426433	-0.0674487	-0.475169	-0.0169036	-0.0208897	0.123782	-0.378955	0.0320016	-0.554228	-0.0800687	-0.138675	0.454362	-1.27447	-1.05088	-0.897937	-0.718176	-0.569781	0.429595	-1.40493
GPRIN3;LOC285513	A0AVI5;A0A024RDD6;Q6ZVF9	G protein-regulated inducer of neurite outgrowth 3	NaN	NaN	NaN	NaN	NaN	NaN	NaN	NaN	-0.842215	NaN	NaN	NaN	NaN	NaN	NaN	NaN	NaN	1.41365	NaN	NaN	NaN	NaN	NaN	NaN	NaN	NaN	NaN	NaN	NaN	NaN	NaN	1.15139	1.32568	NaN	1.1097	NaN	NaN	NaN	1.32851	NaN	NaN	NaN	NaN	NaN	NaN	NaN
SPARCL1	B4E397;B4DNS6;B7ZB68;B4DV72;Q8N4S1;A0A024RDE1;Q14515	SPARC-like protein 1	NaN	NaN	NaN	NaN	NaN	NaN	NaN	NaN	NaN	NaN	NaN	NaN	NaN	NaN	NaN	NaN	NaN	NaN	NaN	NaN	NaN	NaN	NaN	NaN	NaN	NaN	NaN	NaN	NaN	NaN	NaN	NaN	NaN	NaN	NaN	NaN	NaN	NaN	NaN	NaN	NaN	NaN	NaN	NaN	NaN	NaN
PDLIM5;LIM	A0A024RDE8;Q96HC4;H0Y8Y3;Q4W5K9	PDZ and LIM domain protein 5	-0.0955131	-0.319355	-0.767622	-0.22924	-1.59116	-1.26586	-0.0714948	-0.350779	-0.571006	-0.643673	-0.886236	-0.882078	-0.405382	-0.522887	-0.495802	-0.0560001	-0.475544	-0.39483	-0.432039	-0.209681	-0.691193	-0.686481	-0.250052	0.273576	0.0598721	-0.0144223	-1.22434	0.284063	-0.330054	-1.21431	-0.108061	-0.918267	0.0260244	0.0822858	0.0359894	0.74342	-0.0960546	0.310143	-0.253475	0.206823	0.501588	-0.11289	0.163321	-1.13699	-0.219015	-0.30374
HNRPD;HNRNPD	A0A024RDF4;A0A024RDF3;Q14103;H0Y8G5;D6RAF8	Heterogeneous nuclear ribonucleoprotein D0	-0.550199	-0.771433	-0.687693	-0.705602	0.10304	-0.3219	-0.283768	-0.403628	-0.510618	-0.564474	-0.0979871	-0.209355	-0.587848	-0.156553	-0.936069	-1.09341	0.116505	-0.93839	-0.355675	-0.955684	-0.849276	-0.671549	-0.575695	-1.93633	-0.564329	-0.940518	-0.807869	-0.783714	-1.06715	-0.732493	-0.36269	-0.283272	-0.327706	-0.688757	-0.205389	-1.36229	-0.0866838	-0.711778	-0.330016	-0.97127	-0.777392	-0.363913	-1.07687	-0.920661	-1.52375	-0.63926
HNRNPDL;HNRPDL	A0A087WUK2;A0A024RDF6;O14979;B4DTA2	Heterogeneous nuclear ribonucleoprotein D-like	-1.27788	0.279039	-1.40664	-1.29287	-0.330304	-0.571727	-0.170822	-1.86332	-1.17156	-1.4543	-0.29916	-1.58238	-1.24369	-1.27717	-1.70813	-2.08114	-0.619476	-1.36158	-2.01754	-0.664146	0.226978	-1.38778	-1.89508	-1.534	-2.46745	-2.04813	-1.67609	-2.70263	-2.06069	-0.825786	-1.35833	-1.62055	-1.23936	-1.43395	-1.56188	-1.71322	-1.53778	-1.63192	-1.65762	-1.5096	-1.32602	-1.1533	-2.19547	-1.22221	-2.0437	-1.25576
VDP;USO1	A0A024RDG1;O60763	General vesicular transport factor p115	-0.105098	-0.325466	-0.344916	0.187796	0.473402	-0.39249	0.466913	-0.846766	0.232789	-0.176354	-0.322082	-0.58427	-0.0123294	0.196721	-0.4915	-1.34182	-0.183544	-0.345607	-0.434677	-0.317648	0.116771	0.451111	-0.0572645	0.214603	-1.06301	-0.793917	-0.062582	-0.853302	0.156044	-0.799199	-0.414178	0.0839469	-0.0535066	-0.583949	-0.625994	-0.994963	-0.33877	-0.531002	0.0194389	-1.35941	-0.794983	-0.123351	-0.454494	-0.302043	-1.06657	-0.251335
HMFN0839;AGPAT9	A0A024RDG5;Q53EU6	Glycerol-3-phosphate acyltransferase 3	NaN	-0.471135	NaN	NaN	NaN	NaN	NaN	NaN	NaN	NaN	NaN	NaN	0.572887	NaN	NaN	NaN	NaN	NaN	NaN	NaN	NaN	NaN	NaN	NaN	NaN	NaN	NaN	NaN	NaN	NaN	NaN	-0.750338	-1.02112	NaN	NaN	NaN	-0.205893	NaN	0.0203698	NaN	NaN	NaN	NaN	NaN	NaN	NaN
SCARB2	A0A024RDG6;Q14108	Lysosome membrane protein 2	-0.591099	-0.956324	-0.91218	-0.378809	-0.478221	-0.957873	-0.37665	-0.393106	-0.246556	-0.439251	-0.515296	0.176677	-0.670272	-0.333634	-0.693551	-0.68146	-0.12562	-0.446359	-0.304912	-0.540337	-0.809262	0.0850267	-0.780028	-0.619388	-0.0934575	-0.343463	0.254876	-1.01961	-0.0959848	0.00550621	-1.00032	0.200867	-0.136135	-0.238183	-0.622955	-0.522772	0.331343	-0.741375	-0.0580338	-0.827163	-1.17859	-0.560767	-2.71214	0.053906	-2.01258	0.13596
BDH2	A0A024RDG9;Q9BUT1;A8K5M0;A0A024RDJ8;D6R9U8;D6RIR6;B3KY19	3-hydroxybutyrate dehydrogenase type 2	-0.278172	0.319551	-0.594517	-0.666612	-0.814893	-0.518718	-0.420147	-0.591138	-0.612895	-0.804136	-0.36574	-1.34568	-0.287851	0.791801	0.0522072	-1.22811	-0.46764	-0.765463	-0.554659	-0.490964	NaN	0.101864	-0.505013	0.435827	-0.481252	-0.896479	-0.10826	-0.640231	-0.590524	-0.728456	-1.01951	-0.457017	-0.54493	-0.734859	-0.651775	-0.829768	-0.772287	-0.720364	-0.616396	-0.893281	-1.04162	-0.0518593	-0.912267	-0.41045	-0.0116388	-0.944081
RPL34	A0A024RDH8;P49207	60S ribosomal protein L34	0.640459	-0.24313	0.135695	0.00594345	-0.244896	0.503527	0.0290433	0.113128	-0.635428	0.48074	0.216165	-0.395953	-0.816085	-0.61509	-0.8999	-1.10455	0.290417	-0.679013	0.00324733	0.892848	-0.570492	-0.165771	-0.591549	-0.634123	-0.540752	0.16787	0.145105	0.256975	-0.433555	0.508482	-0.209063	0.0939376	-0.327887	-0.444891	0.484971	-0.625259	-0.247237	-0.522017	-0.802169	-0.687012	-0.434667	-0.606837	-1.06104	-0.901074	-0.900795	-0.619884
WDFY3	A0A024RDI0;Q8IZQ1	WD repeat and FYVE domain-containing protein 3	NaN	NaN	NaN	NaN	NaN	NaN	NaN	NaN	NaN	NaN	NaN	NaN	NaN	NaN	NaN	NaN	NaN	NaN	NaN	NaN	NaN	NaN	NaN	NaN	NaN	NaN	NaN	NaN	NaN	NaN	NaN	NaN	NaN	NaN	NaN	NaN	NaN	NaN	NaN	NaN	NaN	NaN	NaN	NaN	NaN	NaN
ADH1B;HEL-S-117;ADH1A	A0A024RDI5;P00325;B4E2R9;F5HB16;V9HW50;D6RHZ6;B7ZB36;B4E1R1;P07327	Alcohol dehydrogenase 1B;Alcohol dehydrogenase 1A	NaN	NaN	2.9916	NaN	2.829	NaN	NaN	NaN	NaN	NaN	NaN	NaN	NaN	NaN	NaN	NaN	NaN	NaN	NaN	NaN	NaN	NaN	NaN	NaN	NaN	2.54422	4.08397	2.04722	4.27609	NaN	NaN	3.22877	3.93803	NaN	3.67818	NaN	NaN	NaN	3.39403	NaN	NaN	2.94489	NaN	NaN	NaN	4.01641
NUDT9	H7C386;Q8NG26;Q96KB3;A0A024RDI6;Q9BW91;D6RAW2	ADP-ribose pyrophosphatase, mitochondrial	NaN	NaN	NaN	NaN	NaN	NaN	NaN	NaN	NaN	NaN	NaN	NaN	NaN	NaN	NaN	NaN	NaN	NaN	NaN	NaN	NaN	NaN	NaN	NaN	NaN	NaN	NaN	NaN	NaN	NaN	NaN	NaN	NaN	NaN	NaN	NaN	NaN	NaN	NaN	NaN	NaN	NaN	NaN	NaN	NaN	NaN
OSTC;DC2	A0A087WUD3;A0A024RDJ1;Q9NRP0	Oligosaccharyltransferase complex subunit OSTC	NaN	NaN	NaN	NaN	NaN	NaN	NaN	NaN	NaN	NaN	NaN	NaN	NaN	NaN	NaN	NaN	NaN	NaN	0.401673	0.502232	0.732165	NaN	NaN	NaN	NaN	-0.937646	NaN	NaN	NaN	NaN	NaN	NaN	NaN	NaN	NaN	NaN	NaN	NaN	NaN	NaN	NaN	0.384979	NaN	NaN	NaN	NaN
ANK2	I6L894;A0A024RDK2;Q01484;A0A024RDI4;B7Z636;E9PHW9;D6RHE1;A0A0U1RQN6;B7Z651	Ankyrin-2	-0.76321	0.283715	-0.0654502	0.0227687	-1.64136	-0.624503	0.434075	0.214484	-0.705761	-0.968587	0.452263	0.181517	-0.825386	-0.281454	0.019345	-0.704823	0.334955	-1.68565	-0.0984814	-0.228098	0.479344	-0.318049	0.100781	0.0232302	-0.484112	-0.13904	0.0815888	-0.459704	-0.714693	-0.695172	-0.318788	-0.34359	-0.0357937	-0.412413	-0.249829	-0.0894091	-0.410302	-0.564815	-0.363416	-0.730322	-0.54872	0.0681747	-0.424038	0.176163	-0.966866	-1.4862
CAMK2D	D6R938;A0A024RDK3;Q13557;E9PBG7;E9PF82;B7Z2B0;Q4G1A8	Calcium/calmodulin-dependent protein kinase type II subunit delta	-1.31476	-0.375565	-0.873742	-1.01851	-0.430487	-1.34161	-0.620845	-0.666048	-0.458684	-0.921018	-1.05771	-0.544803	-0.428281	-0.752717	-1.16844	-0.814671	-0.6494	-0.704343	-0.954623	-1.30075	-0.878046	-0.902395	-0.568651	-0.615101	-1.05936	-1.2429	-0.911669	-0.580288	-0.725481	-0.888248	-1.28363	-0.767383	-0.792306	-0.589584	-0.97493	-0.761448	-0.859583	-0.821976	-0.764887	-0.803488	-0.547345	-0.868153	-0.903505	-0.711125	-0.646045	-0.445845
CCT6A	B2R9K8;A0A024RDL1;P40227;Q59ET3;A1JUI8;B4DPJ8;B4DN39	T-complex protein 1 subunit zeta	-0.93327	-0.933477	-0.851206	-1.02024	-0.87727	-0.928202	-1.04356	-1.06262	-0.969322	-0.903508	-0.848501	-0.696896	-1.26856	-0.553742	-0.625377	-1.10195	-0.765185	-0.97051	-0.578054	-1.04292	-0.99856	-0.528258	-0.998344	-0.781925	-1.22888	-1.12552	-1.10346	-1.10001	-1.0346	-0.917262	-0.740261	-0.840765	-0.717261	-0.920495	-1.1345	-1.17716	-0.709049	-0.936463	-1.01165	-1.30332	-1.0415	-0.711209	-1.38362	-0.664716	-0.645434	-0.616751
RABGEF1	A8K3R3;A0A024RDL6;E9PFK9;Q9UJ41;Q3HKR1;A0A0A0MSJ3;B3KMF1	Rab5 GDP/GTP exchange factor	NaN	NaN	NaN	NaN	NaN	NaN	NaN	NaN	2.08865	NaN	NaN	NaN	NaN	NaN	NaN	NaN	NaN	NaN	NaN	NaN	NaN	NaN	NaN	NaN	NaN	NaN	NaN	NaN	NaN	NaN	NaN	NaN	0.391967	NaN	NaN	NaN	NaN	NaN	NaN	NaN	NaN	NaN	NaN	NaN	NaN	NaN
ASL	A0A024RDL8;P04424;A0A0S2Z316;B4DU69;A0A0S2Z3B0;F8W943	Argininosuccinate lyase	NaN	3.52188	NaN	3.68931	NaN	3.01043	NaN	2.31789	NaN	NaN	2.4337	3.2911	3.16781	NaN	NaN	NaN	NaN	NaN	3.37617	NaN	NaN	NaN	NaN	3.48028	NaN	2.01675	3.44048	NaN	2.54372	NaN	3.2605	2.86754	NaN	3.10358	NaN	NaN	2.76072	2.369	NaN	NaN	NaN	NaN	NaN	NaN	NaN	NaN
CRYL1;HEL30	A0A024RDM2;V9HWG2;Q9Y2S2	Lambda-crystallin homolog	NaN	NaN	NaN	NaN	NaN	NaN	NaN	NaN	-0.890408	0.0458483	NaN	NaN	0.373869	NaN	NaN	NaN	NaN	-0.578504	NaN	NaN	NaN	NaN	NaN	NaN	NaN	NaN	NaN	NaN	NaN	NaN	NaN	NaN	NaN	NaN	NaN	NaN	NaN	NaN	NaN	NaN	NaN	NaN	NaN	NaN	NaN	NaN
MRP63;MRPL57	A0A024RDM4;Q9BQC6	Ribosomal protein 63, mitochondrial	-0.431676	NaN	NaN	NaN	0.0216432	NaN	NaN	NaN	NaN	NaN	NaN	NaN	NaN	NaN	NaN	NaN	NaN	NaN	NaN	NaN	NaN	NaN	NaN	NaN	NaN	NaN	NaN	NaN	NaN	NaN	NaN	NaN	NaN	NaN	NaN	NaN	NaN	NaN	NaN	NaN	NaN	NaN	NaN	NaN	NaN	NaN
PSPC1	A0A024RDP4;B4DWI8;Q8WXF1;X6RDA4	Paraspeckle component 1	-0.761563	-1.28192	-1.2484	-0.636089	-0.429389	-0.951834	-0.463708	-0.678165	-0.960392	-0.835698	-0.220774	0.0591663	0.0511893	-0.331274	-1.47344	-1.22256	-0.675715	-0.987448	-0.603027	-0.464174	-0.492069	-0.425113	-0.684659	-0.739446	-1.68013	-1.30314	-0.571457	-0.970807	-1.09173	-1.5978	-1.54171	-0.708451	-1.13244	-1.18935	-0.727852	-1.48547	-1.223	-1.5199	-0.923515	-1.40778	-0.950222	-1.25898	-1.37066	-1.44282	-1.84623	-1.30068
HSPH1	A0A024RDQ0;A0A024RDS1;Q92598;B4DF68;B4DY72	Heat shock protein 105 kDa	-0.353771	1.40643	-0.582363	0.444574	0.149993	-0.210293	0.191975	0.714821	0.57605	0.252907	1.35983	0.707134	0.707604	0.66332	-1.06392	-0.405601	0.764949	-0.114117	0.161126	-0.294278	-0.438454	0.269974	0.194104	0.0182935	-0.518652	-0.191599	0.162311	-0.781641	-0.296448	-0.158435	-0.674353	-0.0967312	0.242592	-0.801071	0.199824	-1.15756	-0.825822	-0.558547	0.531317	-1.37019	-0.461574	-0.255294	-1.30276	-1.34777	-1.27989	-0.376829
MTIF3	A0A024RDQ7;Q9H2K0	Translation initiation factor IF-3, mitochondrial	NaN	NaN	NaN	NaN	NaN	NaN	NaN	NaN	NaN	NaN	NaN	NaN	NaN	NaN	NaN	NaN	NaN	NaN	NaN	NaN	NaN	NaN	NaN	NaN	NaN	NaN	NaN	NaN	NaN	NaN	NaN	NaN	NaN	NaN	NaN	NaN	NaN	NaN	NaN	NaN	NaN	NaN	NaN	NaN	NaN	NaN
RFC3	Q53HK8;A0A024RDQ8;P40938;B4DKE6;Q5U0C2	Replication factor C subunit 3	NaN	NaN	NaN	NaN	NaN	NaN	NaN	NaN	NaN	NaN	NaN	NaN	NaN	NaN	NaN	NaN	NaN	NaN	NaN	NaN	NaN	NaN	NaN	NaN	NaN	NaN	NaN	NaN	NaN	NaN	NaN	NaN	NaN	NaN	NaN	NaN	NaN	NaN	NaN	NaN	NaN	NaN	NaN	NaN	NaN	NaN
HMGB1	A0A024RDR0;P09429;Q5T7C4;B7Z965;Q59GW1;B3KQ05	High mobility group protein B1	-1.53664	-0.957054	-1.24008	-2.04923	-1.60518	-0.956951	-2.69076	-0.489707	-0.738356	-1.33604	-2.33241	-2.35717	-2.41205	-0.54449	-1.02502	-1.54894	-0.960364	-1.82395	-2.39916	-2.15788	-0.540587	-0.516993	-1.12362	-0.690427	-2.51524	-2.09054	-3.33089	-1.01161	-1.45361	-0.727964	-1.16622	-1.07081	-0.735952	-0.607607	-0.988701	-1.69108	-1.06382	-1.24925	-1.62434	-2.12962	-1.86507	-1.38256	-1.5151	-2.28636	-1.5876	-2.14742
POSTN	A0A024RDS2;Q15063;A0A024RDT5	Periostin	3.16236	0.307776	2.34617	3.74918	2.7643	4.29986	3.6165	4.0047	2.68977	1.78008	4.34791	4.32694	1.772	2.48057	1.437	1.12015	1.91348	1.82562	5.7428	2.23365	1.9281	3.15886	2.20532	2.79597	1.70001	1.29926	1.65383	1.11176	3.34402	3.77458	4.18175	1.52084	1.03653	2.02004	2.8212	3.51151	4.25105	4.34925	3.01004	1.52838	2.20175	2.54998	3.84463	2.08582	5.75272	3.76682
ZNF198;ZMYM2	A8K126;A0A024RDS3;Q9UBW7;B4DZH0	Zinc finger MYM-type protein 2	NaN	NaN	NaN	NaN	NaN	NaN	NaN	NaN	NaN	NaN	NaN	NaN	NaN	NaN	NaN	NaN	NaN	NaN	NaN	NaN	NaN	NaN	NaN	NaN	NaN	NaN	NaN	NaN	NaN	NaN	NaN	NaN	NaN	NaN	NaN	NaN	NaN	NaN	NaN	NaN	NaN	NaN	NaN	NaN	NaN	NaN
CAB39L	Q5TAW7;A0A024RDT3;Q9H9S4;B7ZBJ5;B7ZBJ4	Calcium-binding protein 39-like	NaN	NaN	NaN	NaN	NaN	NaN	NaN	0.986302	NaN	NaN	1.16952	NaN	1.1861	NaN	NaN	NaN	NaN	NaN	NaN	NaN	NaN	NaN	NaN	NaN	NaN	NaN	NaN	NaN	NaN	NaN	NaN	NaN	NaN	NaN	NaN	NaN	NaN	NaN	NaN	1.01581	-1.46404	NaN	0.932637	NaN	NaN	NaN
HEL-S-37;LCP1	V9HWJ7;Q53FI1;A0A024RDT4;P13796;Q59GX5	Plastin-2	NaN	NaN	NaN	NaN	NaN	NaN	NaN	NaN	NaN	NaN	NaN	NaN	NaN	NaN	NaN	NaN	NaN	NaN	2.85674	NaN	NaN	NaN	NaN	NaN	NaN	NaN	NaN	NaN	NaN	NaN	NaN	NaN	NaN	NaN	NaN	NaN	NaN	NaN	NaN	NaN	NaN	4.93969	NaN	NaN	NaN	NaN
GTF2F2	A0A024RDU9;P13984	General transcription factor IIF subunit 2	NaN	NaN	NaN	NaN	NaN	NaN	NaN	NaN	NaN	NaN	NaN	NaN	NaN	NaN	NaN	NaN	NaN	NaN	NaN	NaN	NaN	NaN	NaN	NaN	NaN	NaN	NaN	NaN	NaN	NaN	NaN	NaN	NaN	NaN	NaN	NaN	NaN	NaN	NaN	NaN	NaN	NaN	NaN	NaN	NaN	NaN
RB1	B4DRB3;B4DTN0;A0A024RDV3;Q59HH0;P06400	Retinoblastoma-associated protein	NaN	NaN	NaN	NaN	NaN	NaN	NaN	NaN	NaN	NaN	NaN	NaN	NaN	NaN	NaN	NaN	NaN	NaN	NaN	NaN	NaN	NaN	NaN	NaN	NaN	NaN	NaN	NaN	NaN	NaN	NaN	NaN	NaN	NaN	NaN	NaN	NaN	NaN	NaN	NaN	NaN	NaN	NaN	NaN	NaN	NaN
KPNA3	Q8IYQ9;A0A024RDV7;O00505;Q53F09	Importin subunit alpha;Importin subunit alpha-4	NaN	NaN	NaN	NaN	NaN	1.67029	NaN	NaN	NaN	NaN	NaN	-0.0886845	NaN	NaN	NaN	NaN	NaN	NaN	NaN	0.0154143	NaN	NaN	NaN	NaN	NaN	-0.555172	NaN	-0.708849	NaN	NaN	NaN	NaN	NaN	NaN	NaN	-1.62513	0.228892	NaN	NaN	NaN	NaN	-1.19981	NaN	NaN	NaN	0.332226
TSC22D1	A0A024RDV8;A8K3Y6;Q15714;A0A087X0H8	TSC22 domain family protein 1	NaN	NaN	NaN	NaN	NaN	NaN	NaN	NaN	NaN	NaN	1.24308	NaN	NaN	NaN	NaN	NaN	NaN	NaN	NaN	0.445935	NaN	NaN	NaN	NaN	NaN	NaN	NaN	NaN	NaN	NaN	NaN	NaN	NaN	NaN	NaN	NaN	NaN	NaN	NaN	NaN	NaN	NaN	NaN	NaN	NaN	0.842051
SPG20	B3KMI3;A8K6Q9;A0A024RDV9;Q8N0X7;A0A0S2Z510;B4DXT5;B3KML8	Spartin	NaN	NaN	NaN	0.773812	1.78483	NaN	NaN	NaN	NaN	NaN	NaN	NaN	NaN	NaN	NaN	NaN	NaN	NaN	NaN	NaN	NaN	NaN	NaN	NaN	NaN	NaN	NaN	NaN	NaN	NaN	NaN	NaN	NaN	NaN	0.506681	NaN	NaN	NaN	NaN	NaN	NaN	NaN	NaN	NaN	NaN	NaN
COG6	A0A140VJG7;A0A024RDW5;B4DG73;Q9Y2V7	Conserved oligomeric Golgi complex subunit 6	NaN	NaN	NaN	NaN	1.29846	NaN	NaN	NaN	NaN	NaN	NaN	NaN	NaN	NaN	NaN	NaN	NaN	NaN	NaN	NaN	NaN	NaN	NaN	NaN	NaN	NaN	NaN	NaN	NaN	NaN	NaN	NaN	NaN	NaN	NaN	NaN	NaN	NaN	NaN	NaN	NaN	NaN	NaN	NaN	NaN	NaN
COL4A2	A0A024RDW8;P08572;B4DH43	Collagen alpha-2(IV) chain;Canstatin	1.41886	1.07634	1.32805	1.44292	1.343	1.19754	1.31928	1.75233	1.10305	1.12074	2.26523	1.65515	1.37492	1.38414	0.948534	1.36239	1.30468	1.09465	1.54598	1.91146	1.10504	2.02238	1.41665	1.82316	1.81638	2.2677	2.06417	1.56311	1.87006	1.75921	2.29739	1.96682	1.31556	2.5351	1.72102	2.08293	2.6924	2.62893	1.89476	2.03925	1.81021	2.13553	2.12304	1.77793	1.92711	2.28154
CARKD;FLJ10769	B4DKX7;A0A024RDX4;Q8IW45;B3KSJ9	ATP-dependent (S)-NAD(P)H-hydrate dehydratase	0.795135	-0.164068	NaN	0.730034	-0.0397948	-0.498186	0.803846	NaN	0.835236	0.664585	0.647106	0.860714	0.51596	1.46882	-0.133017	-0.397866	1.01419	-0.702214	1.50008	0.764469	NaN	NaN	0.295748	1.01596	-0.205082	0.020121	0.547125	NaN	0.898726	0.294491	1.38101	0.0275593	-0.0779521	0.764601	0.0658837	1.58584	0.271466	0.457682	0.842702	NaN	-0.0466384	0.221001	NaN	NaN	NaN	NaN
RANBP5;IPO5	A0A024RDY0;O00410;H0Y8C6;B4E0R6;B3KWG6	Importin-5	-0.0467438	1.06002	-0.342481	0.775778	1.55013	-0.0505485	-0.407652	0.13611	0.815488	1.18611	-0.211915	1.04564	0.586091	0.814131	0.734347	-0.446389	1.38918	1.23779	-0.430926	-0.236295	-0.183696	0.328445	0.00924321	-0.0261929	0.565829	-0.0103154	0.532468	0.241821	0.626759	0.0545026	-0.114434	0.276429	-0.0140924	-0.0852663	-0.181505	0.532175	0.408961	0.108105	0.262963	-0.335824	-0.822295	-0.205668	-1.32102	-0.131326	1.33479	-0.765013
LAMP1	B3KRY3;A0A024RDY3;P11279	Lysosome-associated membrane glycoprotein 1	-1.17439	-0.685196	-1.48364	-0.921893	0.10939	-0.954792	-0.207676	-1.26869	-0.604449	-0.372172	-0.311923	-0.162081	-1.02292	-0.965278	-1.20917	-1.10929	-0.21286	-2.01049	-1.39409	-1.72021	NaN	-0.991359	-0.706287	-0.958632	-0.774869	-1.81311	-0.236664	-1.36848	-0.805788	-1.07702	-1.12221	-0.350497	-0.810341	-0.76317	-0.20346	NaN	-0.115965	-0.418197	-0.673547	-1.11181	-1.2263	-0.671293	-1.17913	-0.831553	-0.772086	-1.06406
ARHGEF7	A0A024RDY9;B1ALK7;B7Z6G2;E9PDQ5;Q14155;B7Z344	Rho guanine nucleotide exchange factor 7	NaN	NaN	NaN	NaN	NaN	NaN	NaN	NaN	NaN	NaN	NaN	NaN	NaN	NaN	NaN	NaN	NaN	NaN	NaN	NaN	NaN	NaN	NaN	NaN	NaN	NaN	NaN	NaN	NaN	NaN	NaN	NaN	NaN	NaN	NaN	NaN	NaN	NaN	NaN	NaN	NaN	NaN	NaN	NaN	NaN	NaN
UBAC2;PHGDHL1	X6R5E5;B7Z6T7;A8K2S7;A0A024RE02;Q8NBM4;B3KW74	Ubiquitin-associated domain-containing protein 2	NaN	NaN	NaN	NaN	NaN	NaN	NaN	NaN	NaN	NaN	NaN	NaN	NaN	NaN	NaN	NaN	NaN	NaN	NaN	NaN	NaN	NaN	NaN	NaN	NaN	NaN	NaN	NaN	NaN	NaN	NaN	NaN	NaN	NaN	NaN	NaN	NaN	NaN	NaN	NaN	NaN	NaN	NaN	NaN	NaN	NaN
CLYBL	A0A024RE03;Q8N0X4;B4DU60;Q5JVC2	Citrate lyase subunit beta-like protein, mitochondrial	-0.154626	-1.17639	-0.0183171	-0.331441	-0.291654	-0.655352	0.153575	NaN	0.872842	-0.523963	0.457021	0.322495	-0.533823	-0.234595	-0.695699	-1.41781	-0.310301	-1.18467	-0.604794	0.351976	NaN	0.125416	-0.947238	-1.30863	-1.0169	-0.349485	-0.256482	-0.507277	0.122602	-0.983545	-1.19163	0.440388	-0.323007	-0.514198	0.902794	NaN	NaN	NaN	0.406277	-0.243177	0.0161911	0.292886	NaN	NaN	NaN	NaN
RP11-98F14.6;PCID2	A8K097;A0A024RE04;Q5JVF3;A0A024RDZ9	PCI domain-containing protein 2	NaN	NaN	NaN	NaN	NaN	NaN	NaN	NaN	NaN	NaN	NaN	NaN	NaN	NaN	NaN	NaN	NaN	NaN	NaN	NaN	NaN	NaN	NaN	NaN	NaN	NaN	NaN	NaN	NaN	NaN	NaN	NaN	NaN	NaN	NaN	NaN	NaN	NaN	NaN	NaN	NaN	NaN	NaN	NaN	NaN	NaN
FAHD2A;FAHD2B;hCG_2002650	A0A024RE27;Q96GK7;Q6P2I3;D3DXG4;D3DXG5	Fumarylacetoacetate hydrolase domain-containing protein 2A;Fumarylacetoacetate hydrolase domain-containing protein 2B	-0.616701	-0.758121	-1.22423	-0.782446	-0.400346	-0.685161	-1.13474	-0.911184	-0.290933	-0.956894	-0.415886	-0.505569	-0.615458	-0.539319	-0.780067	-0.922572	-0.878724	-0.850725	-0.633326	-0.826877	-0.230031	-1.0528	-0.22897	-0.758708	-1.1196	-0.528117	-0.237897	-0.657671	-0.561929	-0.645469	-0.829083	-0.508073	-0.285971	-1.06373	0.660976	-0.900827	-1.43695	-0.914217	-0.503745	-1.02871	-0.588392	-0.547073	-0.723155	-0.511873	-0.93752	-0.91437
			NaN	NaN	NaN	NaN	NaN	NaN	NaN	NaN	NaN	NaN	NaN	NaN	NaN	NaN	NaN	NaN	NaN	NaN	NaN	NaN	NaN	NaN	NaN	NaN	NaN	NaN	NaN	NaN	NaN	NaN	NaN	NaN	NaN	NaN	NaN	NaN	NaN	NaN	NaN	NaN	NaN	NaN	NaN	NaN	NaN	NaN
			-0.0869785	0.11359	0.280888	-0.117919	0.153504	0.206381	0.367702	0.467299	-1.35651	-0.0992449	0.292442	-0.121872	-0.151947	-0.590219	0.108078	0.383169	0.223561	-0.525203	0.199169	-0.0369636	-0.430927	-0.0451924	-0.34516	-0.00836476	-0.373367	-1.01428	0.120743	0.0264594	0.399699	-0.431664	0.0787675	-0.0892423	-0.545043	-0.5209	0.683368	-1.13205	-0.329113	-1.2775	0.0671661	-0.460668	NaN	0.621389	-0.9307	-0.150792	NaN	-0.723602
GBA	A0A0G2JNZ5;B7Z7G9;B7Z6E6;D3DV87;B2R6A7;A0A0G2JLB3;A0A068F658;B7Z6S9;P04062;B7Z731;A0A068F753;A0A068F579;A0A0G2JNZ0;A0A068F4C8;A0A068FB60	Glucosylceramidase	NaN	0.768101	NaN	1.50533	NaN	NaN	NaN	1.01253	NaN	1.80753	NaN	1.24084	NaN	NaN	1.09579	NaN	NaN	NaN	0.665775	NaN	NaN	NaN	NaN	NaN	1.15348	NaN	NaN	NaN	NaN	1.90991	-0.864255	1.02359	NaN	NaN	NaN	NaN	NaN	NaN	1.36316	NaN	NaN	NaN	3.19205	NaN	NaN	NaN
DMD	E9PDN5;A0A075B6G3;A0A087WV90;A0A087WTU7		-0.0720008	-0.739795	0.179888	-0.0707179	-0.0579229	-0.630611	-0.272878	0.373384	-0.243804	0.171162	0.130231	0.279445	-0.396996	0.171877	-0.312067	0.0152277	0.115694	-0.383949	-0.238486	0.468842	0.388411	0.439223	-0.374588	-0.0857277	0.136915	-0.284741	0.244888	0.29377	0.639026	-0.311746	-0.16803	0.308495	-0.0301987	0.0131076	-0.0793762	-0.287678	0.0937571	0.0362847	0.334441	-0.381049	0.0611411	0.408563	-0.393808	0.442489	0.297474	0.184313
IGHG3;FLJ00385;DKFZp686I15212	A0A075B6N8;Q8NF17;Q6N030;Q5EBM2;P01860;Q86TT2	Ig gamma-3 chain C region	NaN	NaN	2.0077	NaN	NaN	3.57567	2.86019	NaN	NaN	NaN	NaN	NaN	NaN	NaN	NaN	NaN	NaN	NaN	NaN	NaN	4.30048	3.0807	NaN	NaN	NaN	NaN	NaN	NaN	NaN	NaN	NaN	NaN	NaN	NaN	3.41753	NaN	NaN	NaN	3.79084	NaN	NaN	5.11809	NaN	2.75513	NaN	3.82315
IGHM	A0A087WYJ9;A0A075B6N9;A0A1B0GUU9;P01871;Q86TT1	Ig mu chain C region	NaN	NaN	NaN	NaN	NaN	NaN	NaN	NaN	NaN	NaN	NaN	NaN	NaN	NaN	NaN	NaN	NaN	NaN	NaN	NaN	NaN	NaN	NaN	NaN	NaN	NaN	NaN	NaN	NaN	NaN	NaN	NaN	NaN	NaN	NaN	NaN	4.6553	NaN	NaN	NaN	NaN	NaN	NaN	NaN	NaN	NaN
EPPK1	A0A075B730;A0A087X1U6		NaN	NaN	NaN	NaN	NaN	NaN	NaN	NaN	NaN	NaN	NaN	NaN	NaN	NaN	NaN	NaN	NaN	NaN	NaN	NaN	NaN	NaN	NaN	NaN	NaN	NaN	2.18475	NaN	NaN	NaN	NaN	NaN	NaN	NaN	0.740987	NaN	NaN	NaN	NaN	NaN	NaN	NaN	NaN	NaN	NaN	NaN
MRPS21	A0A075B746;P82921	28S ribosomal protein S21, mitochondrial	NaN	NaN	0.785801	NaN	NaN	NaN	-0.375957	-0.695459	NaN	NaN	NaN	NaN	NaN	-1.26855	NaN	NaN	NaN	NaN	NaN	NaN	NaN	NaN	NaN	NaN	NaN	NaN	NaN	NaN	NaN	NaN	NaN	0.00753798	NaN	0.102015	NaN	NaN	NaN	NaN	NaN	NaN	NaN	NaN	NaN	NaN	NaN	NaN
PDE4DIP	A0A087WVF8;A0A0A0MRM0;A0A0A0MRM1;A0A087WX83;A0A075B749;Q5VU43;A0A0A0MRL8;A0A0A0MRL9;E9PQG4;E9PL24;A0A0C4DFQ0	Myomegalin	NaN	NaN	NaN	NaN	NaN	NaN	NaN	NaN	NaN	NaN	NaN	NaN	NaN	NaN	NaN	NaN	NaN	NaN	NaN	NaN	NaN	NaN	NaN	NaN	NaN	NaN	NaN	NaN	NaN	NaN	NaN	NaN	NaN	NaN	NaN	NaN	NaN	NaN	NaN	NaN	NaN	NaN	NaN	NaN	NaN	NaN
GRIPAP1	A0A087WT45;A0A075B793;A8K7Z3;Q4V328	GRIP1-associated protein 1	NaN	NaN	NaN	NaN	NaN	NaN	NaN	NaN	NaN	NaN	NaN	NaN	NaN	NaN	NaN	NaN	NaN	NaN	NaN	NaN	NaN	NaN	NaN	NaN	NaN	NaN	NaN	NaN	NaN	NaN	NaN	NaN	NaN	NaN	NaN	NaN	NaN	NaN	NaN	NaN	NaN	NaN	NaN	NaN	NaN	NaN
TAF15	A0A075B7D9;Q92804;B4E312	TATA-binding protein-associated factor 2N	NaN	NaN	NaN	NaN	NaN	NaN	NaN	NaN	NaN	NaN	NaN	NaN	NaN	NaN	NaN	NaN	NaN	NaN	NaN	NaN	NaN	NaN	NaN	NaN	NaN	-0.109829	NaN	NaN	NaN	NaN	NaN	NaN	NaN	NaN	NaN	NaN	NaN	NaN	NaN	NaN	NaN	NaN	NaN	NaN	NaN	NaN
APBB1	B7Z1L0;B7Z1P0;B7Z9K0;B7Z4M9;B7Z327;A0A087X0V7;A0A087WYH9;B7Z4M6;B7Z1H5;A0A075B7G8;J3KPL8;Q8TEY4;O00213;V9GYR7;V9GY97;B7Z2A2;B7Z3G1	Amyloid beta A4 precursor protein-binding family B member 1	NaN	NaN	NaN	NaN	NaN	NaN	NaN	NaN	NaN	NaN	NaN	NaN	NaN	NaN	NaN	NaN	NaN	NaN	NaN	NaN	NaN	NaN	NaN	NaN	NaN	NaN	NaN	NaN	NaN	NaN	NaN	NaN	NaN	NaN	NaN	NaN	NaN	NaN	NaN	NaN	NaN	NaN	-1.7126	NaN	NaN	NaN
COX1;coxI;COI;CO1;MT-CO1	A0A075X6S7;Q5Q2N8;Q5Q1W2;A0A075X8H6;X2C5C9;A0A059S1Y5;A0A059RPI8;A0A059QPI2;A0A059RP47;A0A1B1PEL1;A0A059QMF7;A0A059QD37;A0A088FSE5;A0A023Q488;C8YAE4;A0A059R5S6;X5D927;X5C9H5;X5BVM8;X5BMX5;X5BDH6;W8DJ92;W8DEK8;W8D226;W0C7W3;V9PAX5;V9N872;V9N3I6;V9JVR4;V9JU54;V9JI12;V9JCG6;V9JAP4;V9J978;V9J4D6;V9J248;V5L903;V5JIE7;U5ZA32;U5YWV7;U3LSF4;U3L6G3;U3L439;U3KW58;T2HM13;T2HKF7;T1Q7E3;T1Q4Y6;S4SSZ5;R9Y9M1;R…	Cytochrome c oxidase subunit 1	NaN	NaN	NaN	NaN	NaN	NaN	NaN	NaN	NaN	NaN	NaN	NaN	NaN	NaN	NaN	NaN	NaN	NaN	NaN	NaN	NaN	NaN	NaN	NaN	NaN	NaN	NaN	NaN	NaN	NaN	NaN	NaN	NaN	NaN	NaN	NaN	NaN	NaN	NaN	NaN	NaN	NaN	NaN	NaN	NaN	NaN
NUCB2;HEL-S-109;Nucb2	E9PKG6;V9HW75;A0A087WSV8;P80303;Q2L696;E9PLR0;E9PLE9	Nucleobindin-2;Nesfatin-1	0.138772	-0.218264	0.538304	1.3859	-0.0521377	-0.0497894	1.00375	-0.226509	0.326399	-0.268659	-0.134998	0.293947	1.51725	1.21093	-0.384713	-0.0972049	1.89318	0.453611	0.00512281	-1.39604	0.0225075	0.647467	0.861378	0.700826	-0.158854	-0.768753	-0.203209	-0.461438	-1.05211	-0.740625	-1.798	-1.99168	0.0341857	-2.11928	-1.17957	0.596907	NaN	0.274128	-0.186409	0.2289	-0.752577	-0.434455	NaN	0.142263	NaN	-0.276199
hCG_1999356;PMF1-BGLAP;PMF1	D3DVB3;A0A087WT04;U3KQ54;Q6P1K2	Polyamine-modulated factor 1	NaN	NaN	NaN	NaN	NaN	NaN	NaN	NaN	NaN	NaN	NaN	NaN	NaN	NaN	NaN	NaN	NaN	NaN	NaN	NaN	NaN	NaN	NaN	NaN	NaN	NaN	NaN	NaN	NaN	NaN	NaN	NaN	NaN	NaN	NaN	NaN	NaN	NaN	NaN	NaN	NaN	NaN	NaN	NaN	NaN	NaN
GPX4	K7ERP4;A0A087X2I2;A0A087WT12;P36969;Q6PI42;K7EJ20;K7EKX7;R4GNE4;K7ENB4	Glutathione peroxidase;Phospholipid hydroperoxide glutathione peroxidase, mitochondrial	-1.97823	NaN	NaN	NaN	NaN	NaN	NaN	NaN	0.127478	NaN	0.213107	-0.00144202	-0.544075	0.0812168	NaN	-0.0724488	0.160572	NaN	NaN	-0.809908	-1.16343	0.450597	NaN	0.186623	NaN	NaN	NaN	0.134145	NaN	NaN	NaN	-0.727703	NaN	NaN	-0.0657101	NaN	NaN	NaN	NaN	-0.384	-0.721504	-0.706553	-0.705668	NaN	-0.298306	1.59092
EIF2B4;DKFZp586J0119	A0A087WTA5;E7ERK9;Q9UI10;Q9Y3W7;Q71US4	Translation initiation factor eIF-2B subunit delta	NaN	NaN	NaN	NaN	NaN	NaN	NaN	NaN	NaN	NaN	NaN	NaN	NaN	NaN	NaN	NaN	NaN	NaN	-2.10088	NaN	NaN	NaN	NaN	NaN	NaN	-1.23358	-0.10608	NaN	NaN	NaN	NaN	0.819976	NaN	NaN	1.48892	NaN	NaN	NaN	NaN	NaN	0.925385	NaN	NaN	NaN	NaN	NaN
COL1A2	A0A087WTA8;A0A0S2Z3H5;P08123	Collagen alpha-2(I) chain	4.26909	4.26908	7.33242	4.71118	4.49141	3.89521	4.55809	4.78048	4.11617	4.48268	4.85929	4.76042	2.90269	5.31113	3.90909	4.08394	5.70373	3.61607	4.85291	3.69153	3.18149	5.39854	3.45948	4.89896	4.54577	3.13753	5.6837	3.98836	5.8981	4.87249	4.97434	6.09358	4.61064	4.74218	5.83508	5.16966	6.97294	6.05804	6.49961	3.7334	3.41931	5.94625	3.99879	5.469	5.62899	5.22669
KHSRP	A0A087WTP3;Q92945;B4DV73;M0R0I5	Far upstream element-binding protein 2	-0.823303	-0.56115	-1.23992	-0.402788	-0.0744318	-0.365469	-0.0703163	-1.18797	-1.18478	-0.114266	-0.200223	-0.422575	-0.00392377	-0.486225	-0.0648482	-1.09517	0.95453	0.0416768	-0.632847	-0.539767	-0.189475	0.43953	-0.140454	-0.717155	-1.51565	-0.585274	-0.348235	-0.65358	-0.523541	-2.23747	-0.432313	-0.424515	-0.2319	-0.19281	-0.0523852	-1.09315	-0.992299	-0.941692	-0.448617	-0.770304	-1.35907	-1.03311	-1.77575	-1.57623	-1.01026	-0.726574
PYCR2	A0A087WTV6;A0A0S2Z5U6;J3KR12;Q96C36;A0A0S2Z578;B4DQK8	Pyrroline-5-carboxylate reductase 2	NaN	NaN	NaN	NaN	NaN	NaN	NaN	NaN	NaN	NaN	NaN	NaN	NaN	NaN	NaN	NaN	NaN	NaN	NaN	NaN	NaN	NaN	NaN	NaN	NaN	NaN	NaN	NaN	NaN	NaN	NaN	NaN	NaN	NaN	NaN	NaN	NaN	NaN	NaN	NaN	NaN	NaN	NaN	NaN	NaN	NaN
HNRNPDL	A0A087WU03		NaN	NaN	NaN	NaN	NaN	NaN	NaN	NaN	NaN	NaN	NaN	NaN	NaN	NaN	NaN	NaN	NaN	NaN	NaN	NaN	NaN	NaN	NaN	NaN	NaN	NaN	NaN	NaN	NaN	NaN	NaN	NaN	NaN	NaN	NaN	NaN	NaN	NaN	NaN	NaN	NaN	NaN	NaN	NaN	NaN	NaN
MINOS1;MINOS1-NBL1	A0A087WU07;Q5TGZ0;R4GMM1;R4GNA1	MICOS complex subunit MIC10	NaN	NaN	-0.103528	NaN	NaN	NaN	NaN	NaN	NaN	NaN	0.327638	NaN	0.0664123	NaN	0.229568	0.421416	NaN	NaN	NaN	0.382507	NaN	NaN	0.53126	NaN	0.586493	0.82521	-0.153676	0.4655	0.2002	1.05667	NaN	-0.0362404	NaN	NaN	0.891402	0.604913	NaN	NaN	0.0947692	0.949231	0.745648	0.789212	NaN	NaN	0.902659	NaN
MAGT1	B4DH58;A0A087WU53;Q9H0U3;A8MUP5	Magnesium transporter protein 1	NaN	NaN	-0.7082	NaN	NaN	NaN	NaN	NaN	NaN	NaN	NaN	NaN	NaN	NaN	-0.015783	-1.0754	0.858986	-0.123269	0.230533	0.648356	0.480163	NaN	NaN	0.793332	-0.00949054	0.642482	NaN	NaN	2.07097	-0.390448	NaN	-0.526069	0.0493972	NaN	NaN	-0.888695	0.95062	0.190851	0.94536	-0.666302	NaN	NaN	NaN	NaN	NaN	NaN
CTNNBL1	A0A087WUB9;Q8WYA6	Beta-catenin-like protein 1	NaN	NaN	NaN	NaN	NaN	NaN	NaN	NaN	NaN	-0.340163	NaN	NaN	NaN	NaN	NaN	NaN	-0.770364	NaN	1.18945	NaN	NaN	NaN	NaN	NaN	NaN	NaN	NaN	NaN	NaN	NaN	NaN	NaN	-1.65517	-0.47228	NaN	NaN	NaN	NaN	NaN	NaN	NaN	NaN	NaN	NaN	NaN	NaN
SPCS2	B4DDB9;A0A087WUC6;E9PI68;Q15005;E9PL01	Signal peptidase complex subunit 2	-0.664938	0.223057	0.557646	NaN	-0.125916	NaN	NaN	1.12608	NaN	1.32684	0.732069	NaN	0.818376	0.76756	NaN	1.40958	NaN	1.03923	1.6329	2.47613	NaN	NaN	NaN	NaN	-0.0789069	-0.415867	0.724622	NaN	0.0437054	-0.541317	NaN	0.941864	1.1341	-0.193583	0.1435	0.822656	NaN	NaN	3.58015	1.21605	1.3297	NaN	NaN	NaN	NaN	NaN
FGF2	A0A087WUF6;P09038;D9ZGF5	Fibroblast growth factor;Fibroblast growth factor 2	NaN	NaN	NaN	NaN	NaN	NaN	NaN	NaN	NaN	NaN	NaN	NaN	NaN	NaN	NaN	NaN	NaN	NaN	NaN	NaN	NaN	NaN	NaN	NaN	NaN	NaN	NaN	NaN	NaN	NaN	NaN	NaN	NaN	NaN	NaN	NaN	NaN	NaN	NaN	NaN	NaN	NaN	NaN	NaN	NaN	NaN
PEG10	A0A087WZG9;B4DSP0;A0A087WXK2;A0A087WUL4;A0A087WX23;Q86TG7	Retrotransposon-derived protein PEG10	NaN	NaN	NaN	NaN	NaN	NaN	NaN	NaN	NaN	-0.687598	NaN	NaN	NaN	NaN	NaN	-0.361993	NaN	-1.81964	NaN	NaN	NaN	NaN	NaN	NaN	NaN	NaN	NaN	NaN	NaN	NaN	NaN	NaN	NaN	NaN	-0.998051	NaN	NaN	NaN	NaN	NaN	NaN	NaN	NaN	NaN	NaN	NaN
GPX1	A0A087WUQ6;Q7L4Q3;P07203;Q6NSD4	Glutathione peroxidase;Glutathione peroxidase 1	0.93284	0.91584	-0.0775164	0.378525	0.489301	0.541786	1.16052	0.430496	NaN	1.11173	0.377691	0.465899	NaN	0.488856	NaN	0.471189	NaN	0.14535	0.0870743	-0.136934	NaN	NaN	-0.0153549	0.566143	-0.00115369	-0.54409	0.834895	NaN	NaN	0.184131	-0.15562	NaN	-0.418352	-0.238351	NaN	NaN	NaN	NaN	0.237762	0.00884198	0.141493	0.886668	0.197598	NaN	NaN	NaN
RPS24	E7ETK0;A0A087WUS0;P62847	40S ribosomal protein S24	0.462835	0.194658	-0.0367494	0.136281	0.452314	-0.517528	0.899722	0.0852977	0.26393	0.115947	NaN	0.35743	-0.0278048	0.38896	0.244994	0.364265	0.765987	-0.152086	0.755448	0.289069	-0.186068	0.463171	0.411271	0.144393	0.166206	-0.152897	0.570846	-0.426116	0.411091	0.151107	-0.140534	-0.340089	0.0970449	NaN	-0.0249781	-0.186611	-0.317825	-0.247198	0.371982	-0.093425	-0.542486	-0.227063	NaN	NaN	0.00876935	2.60112
EIF5B	A0A087WUT6;O60841;B3KM86;D3DVI5	Eukaryotic translation initiation factor 5B	1.04397	0.750222	NaN	-0.851107	-2.02643	NaN	0.227793	NaN	NaN	NaN	0.269112	NaN	-2.17251	-0.0701146	0.447859	-2.22339	-2.03283	-1.28131	-0.076524	1.79245	NaN	NaN	-1.287	-0.0266939	-0.753829	-1.24563	-1.04901	-2.09815	NaN	-0.893595	-0.497536	-1.9894	0.270614	0.263878	NaN	-0.0441843	-0.728204	0.276258	-1.16247	NaN	NaN	NaN	NaN	NaN	NaN	NaN
IKBKG	D3DWY2;D3DWY0;A0A087X0G7;A0A087WUW6;A0A087X1B1;Q9Y6K9	NF-kappa-B essential modulator	NaN	NaN	NaN	NaN	NaN	NaN	NaN	NaN	NaN	NaN	NaN	NaN	NaN	NaN	NaN	NaN	NaN	NaN	NaN	NaN	NaN	NaN	NaN	NaN	NaN	NaN	NaN	NaN	NaN	NaN	NaN	NaN	NaN	NaN	NaN	NaN	NaN	NaN	NaN	NaN	NaN	NaN	NaN	NaN	NaN	NaN
APOOL;DKFZp779P1227	A0A087WUX8;A0A087WYF7;Q6UXV4;Q68DW4	MICOS complex subunit MIC27	-0.627623	0.135604	-0.330059	-0.0424861	0.0772085	-0.77408	0.41448	-0.582069	-0.0614499	NaN	-0.305324	1.54612	-0.0832474	NaN	-0.300417	-0.713784	1.11503	-1.15194	-0.422018	-0.219761	0.129182	NaN	0.224042	-0.60589	-0.370945	-0.680659	0.359862	NaN	0.565246	NaN	-0.831715	0.706338	0.178098	-0.244951	0.0443004	NaN	-0.685985	-0.96997	0.429139	-0.889214	-0.198246	-0.944858	-0.593381	-0.359257	NaN	-1.08761
MYCBP	Q6IB68;A0A087WV05;Q99417	C-Myc-binding protein	NaN	NaN	NaN	NaN	NaN	NaN	NaN	NaN	NaN	NaN	0.138553	NaN	NaN	NaN	NaN	NaN	NaN	NaN	NaN	NaN	NaN	NaN	NaN	NaN	NaN	NaN	NaN	NaN	NaN	NaN	NaN	NaN	NaN	NaN	NaN	NaN	NaN	NaN	NaN	NaN	NaN	NaN	NaN	NaN	NaN	NaN
FGFR1OP	A0A087WV25;B4DH64;O95684	FGFR1 oncogene partner	NaN	NaN	NaN	NaN	NaN	NaN	NaN	NaN	NaN	NaN	NaN	NaN	NaN	NaN	NaN	NaN	NaN	NaN	NaN	NaN	NaN	NaN	NaN	NaN	NaN	NaN	NaN	NaN	NaN	NaN	NaN	NaN	NaN	NaN	NaN	NaN	NaN	NaN	NaN	NaN	NaN	NaN	NaN	NaN	NaN	NaN
NAT10	A0A087WV29;Q9H0A0	N-acetyltransferase 10	NaN	NaN	NaN	NaN	NaN	NaN	NaN	NaN	NaN	NaN	NaN	NaN	NaN	NaN	NaN	NaN	NaN	NaN	NaN	NaN	NaN	NaN	NaN	NaN	NaN	NaN	NaN	-0.289244	NaN	NaN	NaN	NaN	NaN	NaN	NaN	NaN	NaN	NaN	NaN	NaN	NaN	NaN	NaN	NaN	NaN	NaN
TTR;HEL111	A6XMH1;A0A087WV45;E9KL36;A6XGL1;P02766;A0A087WT59	Transthyretin	2.84653	NaN	NaN	NaN	NaN	NaN	NaN	NaN	NaN	3.03765	NaN	3.08657	NaN	NaN	NaN	NaN	NaN	NaN	NaN	NaN	NaN	NaN	NaN	NaN	NaN	NaN	3.58365	-0.30381	2.85851	NaN	NaN	NaN	2.97971	NaN	NaN	NaN	NaN	NaN	2.92275	3.86116	NaN	3.05299	1.90639	NaN	NaN	NaN
LAMTOR4	A0A087WV46;C9JXA7;Q0VGL1	Ragulator complex protein LAMTOR4;Ragulator complex protein LAMTOR4, N-terminally processed	NaN	NaN	NaN	NaN	NaN	NaN	NaN	NaN	NaN	NaN	NaN	NaN	NaN	NaN	NaN	NaN	NaN	NaN	NaN	NaN	NaN	NaN	NaN	NaN	NaN	NaN	NaN	NaN	NaN	NaN	NaN	NaN	NaN	NaN	NaN	NaN	NaN	NaN	NaN	NaN	NaN	NaN	NaN	NaN	NaN	NaN
DDX50;mcdrh	B4DED6;A0A087WVC1;K0J110;Q9BQ39;B4DW97;Q53FI9	ATP-dependent RNA helicase DDX50	NaN	0.0638162	NaN	NaN	NaN	NaN	NaN	NaN	NaN	NaN	NaN	NaN	0.00740562	NaN	NaN	NaN	NaN	NaN	-0.461005	NaN	NaN	NaN	NaN	NaN	NaN	NaN	NaN	NaN	NaN	NaN	NaN	NaN	NaN	NaN	NaN	NaN	NaN	NaN	NaN	NaN	NaN	NaN	NaN	NaN	NaN	NaN
PRKACB	B7ZA00;A0A087WVC4;B2RB89;A0A0A0MS54;B4E2L0;P22694;B1APG1;B1APG0;B1APG2;B1APF8;B1APF9;B1APG3;B1APF7	cAMP-dependent protein kinase catalytic subunit beta	-0.510253	-0.285343	-0.812868	NaN	NaN	NaN	NaN	NaN	NaN	NaN	NaN	NaN	NaN	NaN	NaN	NaN	NaN	NaN	-1.02935	-1.2725	NaN	NaN	0.396859	-0.921512	NaN	-0.421479	NaN	NaN	NaN	NaN	-0.765959	NaN	NaN	NaN	NaN	NaN	NaN	NaN	NaN	NaN	-0.255857	NaN	-0.382357	NaN	NaN	NaN
AS3MT	A0A087WVD4;Q9HBK9	Arsenite methyltransferase	NaN	NaN	NaN	NaN	NaN	NaN	NaN	0.310646	NaN	NaN	NaN	NaN	NaN	NaN	NaN	NaN	0.408378	NaN	NaN	NaN	NaN	NaN	NaN	NaN	NaN	2.94375	NaN	NaN	NaN	NaN	NaN	NaN	NaN	NaN	NaN	NaN	NaN	NaN	NaN	NaN	NaN	NaN	NaN	NaN	NaN	NaN
ITSN2	A6H8W8;A0A087WVF7;Q9NZM3;Q53TK4	Intersectin-2	NaN	-1.1042	NaN	NaN	NaN	NaN	NaN	NaN	NaN	NaN	NaN	2.48269	NaN	-0.47044	NaN	NaN	NaN	NaN	NaN	NaN	NaN	NaN	NaN	NaN	NaN	NaN	NaN	NaN	NaN	0.0698303	NaN	1.30711	NaN	NaN	NaN	NaN	NaN	NaN	NaN	NaN	NaN	NaN	NaN	NaN	NaN	NaN
COG1	A0A087WVI0;E9PBL8;Q8WTW3;B3KUY5;Q4G0L8	Conserved oligomeric Golgi complex subunit 1	NaN	NaN	NaN	NaN	NaN	NaN	NaN	NaN	NaN	NaN	NaN	NaN	NaN	NaN	NaN	NaN	NaN	NaN	NaN	NaN	NaN	NaN	NaN	NaN	NaN	NaN	NaN	NaN	NaN	NaN	NaN	NaN	NaN	NaN	NaN	NaN	NaN	NaN	NaN	NaN	NaN	NaN	NaN	NaN	NaN	NaN
MTHFD1L	A0A087WVM4;B7ZM99;Q6UB35;B2RD24	Monofunctional C1-tetrahydrofolate synthase, mitochondrial	NaN	0.891822	-0.527371	1.50116	1.02247	-0.540325	0.694808	-0.0207689	NaN	NaN	1.2629	0.636257	-0.325939	0.0504366	NaN	NaN	-0.141956	0.100469	0.569242	1.5558	NaN	0.149721	0.699678	1.62287	0.780512	0.759112	NaN	NaN	NaN	-0.683472	NaN	0.911071	1.50537	NaN	0.0662914	NaN	NaN	NaN	-0.0262193	NaN	0.00637642	-0.059505	NaN	NaN	NaN	NaN
FAT1	A0A087WVP1;Q14517	Protocadherin Fat 1;Protocadherin Fat 1, nuclear form	NaN	NaN	NaN	NaN	1.21769	NaN	NaN	NaN	NaN	NaN	NaN	NaN	NaN	0.62371	NaN	NaN	NaN	NaN	NaN	NaN	NaN	NaN	NaN	NaN	NaN	NaN	NaN	NaN	NaN	NaN	NaN	NaN	NaN	NaN	NaN	NaN	NaN	NaN	NaN	NaN	NaN	NaN	NaN	NaN	NaN	NaN
CLTC	A0A087WVQ6;Q00610	Clathrin heavy chain;Clathrin heavy chain 1	-0.629743	-0.469162	-0.805744	-0.319654	-0.61964	-1.01987	-0.500594	-1.18932	-0.843281	-0.774565	-0.502241	-0.854613	-0.984114	-0.440099	-0.795382	-0.751725	-0.817562	-0.825304	-0.734089	-0.714155	-0.525254	-0.801036	-0.898744	-0.880565	-0.863301	-1.09227	-0.801232	-1.22905	-0.620195	-0.94061	-1.16501	-0.373481	-0.664026	-0.926641	-0.799887	-0.995553	-0.707374	-0.730083	-0.916512	-0.956423	-1.00606	-0.518586	-1.33743	-0.688432	-0.911197	-0.58338
HECTD1	A0A087WVU6;G3V4V5;A0A087X2H1;Q9ULT8	E3 ubiquitin-protein ligase HECTD1	NaN	NaN	NaN	NaN	NaN	NaN	NaN	NaN	NaN	NaN	NaN	NaN	NaN	NaN	NaN	NaN	NaN	NaN	NaN	NaN	NaN	NaN	NaN	NaN	NaN	NaN	NaN	NaN	NaN	NaN	NaN	NaN	NaN	NaN	NaN	NaN	NaN	NaN	NaN	NaN	NaN	NaN	NaN	NaN	NaN	NaN
CACNB2;CACNB4;CACNB1	B7Z1U5;A0A087WVX5;Q5VVH1;Q59H42;B7Z3Y0;Q08289;Q580I4;A0A1B0GTP5;B7Z4Q4;A0A1B0GWF9;A0A1B0GUK4;A0A1B0GVB2;A0A1B0GVU5;A0A1B0GTS4;A0A1B0GU53;B7Z6N7;E7EN11;A0A1B0GTF6;A0A1B0GTA9;A0A1B0GTN8;A0A1B0GXG0;H0Y476;A0A1C7CYX2;A0A1B0GTX2;A8K5R3;Q59GD3;O00305;Q02641	Voltage-dependent L-type calcium channel subunit beta-2;Voltage-dependent L-type calcium channel subunit beta-4;Voltage-dependent L-type calcium channel subunit beta-1	NaN	NaN	NaN	NaN	0.241475	NaN	NaN	NaN	NaN	NaN	NaN	NaN	NaN	NaN	NaN	NaN	0.147389	NaN	NaN	NaN	NaN	0.00634731	NaN	NaN	NaN	NaN	NaN	NaN	NaN	NaN	NaN	-0.492212	-0.40021	NaN	NaN	NaN	NaN	NaN	0.34452	NaN	0.30123	NaN	NaN	NaN	-1.36328	-0.851439
POLR2E	B4DJ89;A0A087WWX0;A0A087WVZ9;A0A0A0MQR7;E5KT65;P19388;A0A087WVN5	DNA-directed RNA polymerases I, II, and III subunit RPABC1	0.262313	NaN	NaN	NaN	NaN	NaN	NaN	NaN	NaN	NaN	NaN	-0.170566	-1.71053	NaN	NaN	NaN	NaN	NaN	NaN	NaN	NaN	-1.82827	0.0541976	-1.28303	NaN	NaN	0.599265	NaN	0.0881014	-1.12697	-0.970486	-0.824808	-0.33039	-0.531642	-1.2254	NaN	-0.674099	-0.773975	-0.727275	-1.52544	NaN	NaN	NaN	0.221606	NaN	NaN
SH3GLB1	A0A140VJU5;A0A087WW40;Q9Y371	Endophilin-B1	0.385205	0.427058	-0.407516	0.678857	0.959789	-1.10683	0.430801	0.228503	-0.632965	-0.380181	0.38463	0.235263	0.213276	1.13445	0.782321	NaN	1.51288	0.715988	0.525863	-0.31717	0.177033	0.284651	-0.606178	-0.0226371	-0.457227	NaN	0.11009	NaN	-0.144046	NaN	NaN	-0.447949	-0.167358	NaN	-0.683596	1.09983	0.432832	0.531969	1.10584	NaN	-0.212881	NaN	NaN	0.0561828	NaN	NaN
PRSS1;PRSS2;PRSS3;TRY8;PRSS3P2	Q86W17;Q53ZX9;Q53ZX8;Q53ZX7;Q45KI0;H0Y8D1;CON__P07477;A0A087WW55;E7EQ64;P07477;Q86W20;Q86W19;Q86W18;Q6PK75;A6XGL3;A6XMV8;A1A508;Q5NV56;Q3SY20;Q3SY19;A0A0J9YYC8;Q7Z5F3;A6XMV9;Q8NHM4;P07478	Trypsin-1;Alpha-trypsin chain 1;Alpha-trypsin chain 2;Putative trypsin-6;Trypsin-2	NaN	NaN	NaN	NaN	NaN	NaN	NaN	NaN	NaN	NaN	NaN	NaN	NaN	NaN	NaN	NaN	NaN	NaN	NaN	NaN	NaN	NaN	NaN	NaN	NaN	NaN	NaN	NaN	NaN	NaN	NaN	NaN	NaN	NaN	NaN	NaN	NaN	NaN	2.48431	1.4039	NaN	NaN	NaN	NaN	NaN	NaN
LLGL1	A0A087WW77;Q15334;A0PJG1	Lethal(2) giant larvae protein homolog 1	NaN	4.4646	NaN	NaN	NaN	0.775416	NaN	0.274931	NaN	NaN	0.377426	NaN	0.225741	NaN	0.355775	NaN	NaN	1.79152	-0.660107	NaN	NaN	NaN	2.19463	1.44434	NaN	NaN	1.13369	NaN	NaN	0.567447	NaN	0.447938	-0.113034	-0.217875	-0.152378	-0.348459	-0.791022	NaN	0.100617	NaN	-0.808328	NaN	-1.31574	NaN	NaN	-1.81463
NCAM1	A0A087WWD4;P13591;A0A087WX77;A0A087WV75	Neural cell adhesion molecule 1	-0.870546	-1.54605	-1.12879	-1.31589	-1.12081	-1.84899	-0.333466	-0.584047	-1.02622	-0.847134	-0.856642	-0.522513	-1.56371	-0.407425	-2.44877	-2.0024	-0.522761	-1.86848	-0.745743	0.0928049	-1.1073	-1.18983	-1.34912	-1.05507	-1.59008	-1.006	-0.968411	-2.05303	-0.954392	-1.95395	-0.952512	-0.857073	-2.09798	-1.46186	-0.753299	-1.31065	-0.822102	-1.59902	-1.81277	-2.22084	-0.938279	-1.17034	-1.27027	-0.76659	-0.485227	-1.43771
POLD2	B4DP28;F8W8R3;A0A087WWF6;P49005;H7C1B3;C9IZD2;C9J8Z7;C9JLE1	DNA polymerase delta subunit 2	NaN	NaN	NaN	NaN	NaN	NaN	NaN	NaN	NaN	NaN	NaN	NaN	NaN	NaN	NaN	NaN	NaN	NaN	NaN	NaN	NaN	NaN	NaN	NaN	NaN	NaN	NaN	NaN	NaN	NaN	NaN	NaN	NaN	NaN	NaN	NaN	NaN	NaN	NaN	NaN	NaN	NaN	NaN	NaN	NaN	NaN
IQSEC1	A0A0C4DGT3;B4DGC5;A0A087WWK8;Q6DN90	IQ motif and SEC7 domain-containing protein 1	NaN	NaN	NaN	NaN	NaN	NaN	NaN	NaN	NaN	NaN	NaN	NaN	0.424146	NaN	NaN	NaN	NaN	NaN	NaN	NaN	NaN	NaN	NaN	NaN	NaN	NaN	NaN	NaN	NaN	NaN	NaN	NaN	NaN	NaN	NaN	NaN	NaN	NaN	NaN	NaN	NaN	NaN	NaN	NaN	NaN	NaN
RBM15	A0A087WWP4;Q96T37	Putative RNA-binding protein 15	NaN	NaN	NaN	NaN	NaN	NaN	NaN	NaN	NaN	NaN	NaN	NaN	NaN	NaN	NaN	NaN	NaN	-0.548042	NaN	NaN	NaN	NaN	NaN	NaN	NaN	NaN	NaN	NaN	NaN	NaN	NaN	NaN	NaN	NaN	NaN	NaN	NaN	NaN	NaN	NaN	NaN	NaN	NaN	NaN	NaN	NaN
THOC1	A0A087WWS1;Q96FV9;R4GMN4	THO complex subunit 1	NaN	NaN	NaN	NaN	NaN	NaN	NaN	NaN	NaN	NaN	NaN	NaN	NaN	NaN	NaN	NaN	NaN	NaN	NaN	NaN	NaN	NaN	NaN	NaN	NaN	NaN	1.5277	NaN	NaN	NaN	NaN	NaN	NaN	NaN	NaN	NaN	NaN	NaN	NaN	NaN	NaN	NaN	NaN	NaN	NaN	NaN
CFAP99	A0A087WWY8;A0A0U1RQC7		NaN	NaN	0.768519	NaN	NaN	NaN	NaN	NaN	NaN	NaN	NaN	NaN	NaN	NaN	NaN	NaN	NaN	NaN	NaN	NaN	NaN	NaN	NaN	NaN	NaN	NaN	NaN	NaN	NaN	NaN	NaN	NaN	-0.0894945	NaN	NaN	NaN	NaN	NaN	NaN	NaN	NaN	NaN	NaN	NaN	NaN	NaN
VPS11;DKFZp564P2364	B7Z879;Q658K0;Q53FX3;A0A087WXL6;Q9H270;A0A0G2JS92	Vacuolar protein sorting-associated protein 11 homolog	NaN	NaN	NaN	NaN	NaN	NaN	NaN	NaN	NaN	NaN	NaN	NaN	NaN	NaN	NaN	NaN	NaN	NaN	NaN	NaN	NaN	NaN	NaN	NaN	NaN	NaN	NaN	NaN	NaN	NaN	NaN	NaN	NaN	NaN	NaN	NaN	NaN	NaN	NaN	NaN	NaN	NaN	NaN	NaN	NaN	NaN
BCAM;LU	A0A087WXM8;I7L574;I7KDP0;G0TQY6;A0A0A1TTQ0;P50895;A0A068W6H0;K7ENU8	Basal cell adhesion molecule	-0.636768	-0.306532	-0.947484	-0.436866	-0.481092	-0.721104	-0.402055	-0.392635	-0.430743	-0.381549	0.0173975	-0.342458	-0.307955	-0.0259871	-0.608641	-0.275839	-0.131133	-0.48435	-0.375781	-0.442249	-0.470213	-0.396109	-0.682833	-0.621195	0.171241	-0.0367527	0.552478	-0.611121	-0.284419	-0.472553	-0.311329	0.569674	0.0246604	-0.405609	0.336701	-0.462443	0.205579	-0.109366	-0.333671	-0.667754	-0.395749	-0.115202	-0.208756	0.441068	-0.199625	-0.013952
MTSS1L	A0A087WXN9;Q765P7	MTSS1-like protein	NaN	NaN	NaN	NaN	NaN	NaN	NaN	NaN	NaN	NaN	NaN	NaN	NaN	NaN	NaN	NaN	NaN	NaN	NaN	NaN	NaN	NaN	NaN	NaN	NaN	NaN	NaN	NaN	NaN	NaN	NaN	NaN	NaN	NaN	NaN	NaN	NaN	NaN	NaN	NaN	NaN	NaN	NaN	NaN	NaN	NaN
ITGB6	A0A087WXP3;E9PEE8;B4E2B8;A8K2N5;P18564	Integrin beta;Integrin beta-6	NaN	NaN	NaN	NaN	NaN	0.485236	NaN	0.598936	NaN	NaN	0.309954	NaN	1.30868	NaN	NaN	NaN	NaN	NaN	0.872525	0.423131	0.152578	NaN	NaN	0.504393	NaN	0.934577	NaN	0.0140876	NaN	NaN	NaN	NaN	NaN	NaN	NaN	NaN	NaN	NaN	NaN	0.288047	0.788403	0.0709212	0.698776	NaN	NaN	NaN
ASNA1	A0A087WXS7;O43681;B4DEE5;K7ERW9	ATPase ASNA1	-0.973795	-0.904832	-0.877966	0.0993862	0.232396	-0.602034	-0.809744	-0.31936	-0.854307	-0.565307	-0.413769	1.85246	-0.769311	-0.316543	-0.459915	-0.99247	-0.595504	-1.19279	-1.00375	-0.973542	-0.0936814	-0.108625	-0.855259	-0.571105	NaN	-0.963141	-0.771963	-0.930409	-0.738376	-0.769291	-0.760772	-0.986416	-0.742203	-0.911162	-0.665583	-0.865883	-0.948687	-0.629979	-0.142173	-1.12925	-0.975113	-0.829603	-0.974894	-0.820857	-0.91413	-0.561982
RMND1	Q5SZ82;A0A087WXU0;Q9NWS8	Required for meiotic nuclear division protein 1 homolog	NaN	NaN	NaN	NaN	NaN	NaN	NaN	NaN	NaN	NaN	NaN	NaN	NaN	NaN	NaN	NaN	NaN	NaN	NaN	NaN	NaN	NaN	NaN	NaN	NaN	NaN	NaN	NaN	NaN	NaN	NaN	NaN	NaN	NaN	NaN	NaN	NaN	NaN	NaN	NaN	NaN	NaN	NaN	NaN	NaN	NaN
ESYT2	H7BXI1;A0A087WXU3;A0FGR8	Extended synaptotagmin-2	1.19614	-0.234668	0.723064	1.39062	0.201701	1.16995	NaN	0.382025	NaN	2.25512	-0.271267	-1.64149	-0.0790197	0.191892	0.188809	-0.0366087	1.52321	-0.0265876	0.554431	0.509224	NaN	NaN	-0.373398	NaN	NaN	1.25484	-0.200379	NaN	-0.426318	-0.390117	-1.16002	-0.331502	-0.156117	1.00398	NaN	0.789034	NaN	-0.109829	NaN	NaN	-0.694954	NaN	-0.316377	0.330393	NaN	-1.3804
DDX24	Q7Z4W0;A0A087WXU8;Q7Z4X3;F5GYL3;B4E300;B4DKV2;G3V529;Q9GZR7;B4DM03;B4DGI6	ATP-dependent RNA helicase DDX24	NaN	NaN	NaN	NaN	NaN	NaN	NaN	NaN	NaN	NaN	NaN	NaN	NaN	NaN	NaN	NaN	NaN	NaN	0.182442	NaN	NaN	NaN	NaN	NaN	NaN	NaN	NaN	NaN	NaN	NaN	NaN	NaN	2.31079	NaN	1.92079	NaN	NaN	NaN	NaN	NaN	NaN	NaN	NaN	NaN	NaN	NaN
VTA1	A0A087WY55;Q9NP79;Q9C063;Q5TGM0	Vacuolar protein sorting-associated protein VTA1 homolog	-1.22385	-0.385369	-0.667864	-1.65939	-0.787683	-0.137504	-0.245159	0.0802252	-1.7652	-0.0402008	-0.0365445	-0.11825	-1.15181	-1.29523	-1.0333	-0.767773	-1.53393	-1.38571	0.361732	-0.0894156	-0.076983	-0.684522	-0.923491	-1.23942	-1.27133	-1.0857	-1.32469	-1.86912	-2.02283	-1.58135	-2.11473	-1.51052	-2.20464	-2.80115	-2.08683	-3.11713	-1.77808	-1.49435	-1.89654	-1.54681	NaN	-1.23787	-1.73301	-1.65542	-1.64277	-1.55646
Em:AP000351.3;GSTT2;GSTT2B	Q6ICJ4;A0A087WY67;Q6IB75;G9J6Q6;G9J6Q5;G9J6Q4;B2R533;P0CG30;P0CG29	Glutathione S-transferase theta-2B;Glutathione S-transferase theta-2	NaN	NaN	NaN	NaN	NaN	NaN	NaN	NaN	NaN	NaN	NaN	NaN	NaN	NaN	NaN	NaN	NaN	NaN	NaN	NaN	NaN	NaN	NaN	NaN	NaN	NaN	NaN	NaN	NaN	NaN	NaN	NaN	NaN	NaN	NaN	NaN	NaN	NaN	NaN	NaN	NaN	NaN	NaN	NaN	NaN	NaN
AP2M1	A0A087WY71;E9PFW3;B4DNB9;Q96CW1;B4DJB1;B4DFM1;B4E304;C9JJ47;B4DTI4;B7Z4N2	AP-2 complex subunit mu	0.191104	1.88087	0.392232	3.32377	1.37999	0.0328894	NaN	2.29902	2.36624	1.83321	2.26737	2.17419	1.14958	1.99708	2.45878	1.38154	2.42905	-0.400385	1.63491	0.576554	NaN	3.83427	0.386288	0.489743	0.73859	-0.396106	0.113096	-0.17479	1.47739	0.944554	0.0758393	0.257996	1.45241	-1.06371	1.7161	0.45616	0.658854	0.389128	0.0601866	NaN	NaN	NaN	NaN	NaN	NaN	2.1771
UPF3B	A0A087WYC8;Q0VAK7;B3KSJ3;Q9BZI7	Regulator of nonsense transcripts 3B	NaN	NaN	NaN	NaN	NaN	NaN	NaN	NaN	NaN	NaN	NaN	NaN	NaN	NaN	NaN	NaN	NaN	NaN	NaN	NaN	NaN	NaN	NaN	NaN	NaN	NaN	NaN	NaN	NaN	NaN	NaN	NaN	NaN	NaN	NaN	NaN	NaN	NaN	NaN	NaN	NaN	NaN	NaN	NaN	NaN	NaN
MAPK8IP3	E9PFH7;B7ZMF3;A0A087WYG2;Q9UPT6	C-Jun-amino-terminal kinase-interacting protein 3	NaN	NaN	NaN	NaN	NaN	NaN	NaN	NaN	NaN	NaN	NaN	NaN	NaN	NaN	NaN	NaN	NaN	NaN	NaN	NaN	NaN	NaN	NaN	NaN	NaN	NaN	NaN	NaN	NaN	NaN	NaN	NaN	NaN	NaN	NaN	NaN	NaN	NaN	NaN	NaN	NaN	NaN	NaN	NaN	NaN	NaN
DHX29	A0A087WYN9;Q7Z478	ATP-dependent RNA helicase DHX29	NaN	-0.766328	NaN	NaN	0.110932	NaN	NaN	NaN	NaN	NaN	NaN	NaN	-0.583712	NaN	NaN	NaN	NaN	NaN	NaN	NaN	NaN	NaN	NaN	NaN	NaN	NaN	NaN	NaN	NaN	NaN	NaN	NaN	-0.584	NaN	NaN	NaN	NaN	NaN	NaN	NaN	NaN	NaN	NaN	NaN	NaN	NaN
C11orf31;SELH	A0A087WYP2;Q8IZQ5;A0A024R4Y9	Selenoprotein H	NaN	NaN	NaN	NaN	NaN	NaN	NaN	NaN	0.9306	NaN	0.00164562	NaN	NaN	NaN	NaN	NaN	NaN	NaN	NaN	NaN	NaN	NaN	NaN	NaN	NaN	NaN	NaN	NaN	NaN	NaN	NaN	NaN	NaN	NaN	NaN	NaN	-0.390998	NaN	NaN	NaN	NaN	-0.964657	-0.267116	-0.162339	NaN	NaN
SRP19	A0A087WYR0;P09132	Signal recognition particle 19 kDa protein	NaN	NaN	NaN	NaN	NaN	NaN	NaN	NaN	NaN	NaN	NaN	NaN	NaN	NaN	NaN	NaN	NaN	NaN	NaN	NaN	NaN	NaN	NaN	NaN	NaN	NaN	NaN	NaN	NaN	NaN	NaN	NaN	NaN	NaN	NaN	NaN	NaN	NaN	NaN	NaN	NaN	NaN	NaN	NaN	NaN	NaN
TPD52L2;DKFZp686A1765	A0A087WYR3;Q68E05;Q6FGS1;O43399;Q53GA0;A0A087WZ51;Q5J908	Tumor protein D54	0.666866	0.599812	-0.0115016	-0.228299	1.0825	-0.185181	NaN	0.145302	0.375245	-0.0625784	0.300281	0.217732	-0.0265876	1.18347	-0.750316	-0.231862	0.731174	-0.019759	0.133577	-0.197774	0.223008	0.538928	0.583085	0.204932	0.256905	-0.113905	0.562985	0.231318	1.38873	0.534496	0.354512	0.89167	0.160209	0.644217	0.189459	0.198084	0.0679388	NaN	0.883645	0.313337	0.100551	0.0861384	-0.0132683	0.337302	-0.364572	1.4591
C16orf13	A0A087WYU2;Q96S19;H3BS73;H3BNB2	UPF0585 protein C16orf13	-0.0287189	-0.873734	-1.32941	-0.57672	-0.960141	-1.04621	-0.310689	-0.548733	-0.703101	-0.538836	-0.574063	-0.00501178	NaN	-0.209017	NaN	-0.829606	0.0303686	-0.8349	NaN	-0.598663	NaN	NaN	-0.369383	NaN	-0.675455	-0.663028	NaN	NaN	-0.876487	NaN	NaN	-0.337368	-0.387252	-0.505281	-0.110898	-1.06736	NaN	NaN	-1.192	NaN	NaN	NaN	NaN	NaN	NaN	NaN
ATP13A3	A0A087WYY3;Q9H7F0	Probable cation-transporting ATPase 13A3	NaN	NaN	NaN	NaN	NaN	NaN	NaN	NaN	NaN	NaN	NaN	NaN	NaN	NaN	NaN	NaN	NaN	NaN	NaN	NaN	NaN	NaN	NaN	NaN	NaN	NaN	NaN	NaN	NaN	NaN	NaN	NaN	NaN	NaN	NaN	NaN	NaN	NaN	NaN	NaN	NaN	NaN	NaN	NaN	NaN	NaN
GATA4;GATA-4;pp10443	Q16365;A0A087WZ09;P43694;Q13222;Q8WYX6	Transcription factor GATA-4	NaN	NaN	NaN	NaN	NaN	NaN	NaN	NaN	NaN	NaN	NaN	NaN	NaN	NaN	NaN	NaN	NaN	NaN	NaN	NaN	NaN	NaN	NaN	NaN	NaN	NaN	NaN	NaN	NaN	NaN	NaN	NaN	NaN	NaN	NaN	NaN	NaN	NaN	NaN	NaN	NaN	NaN	NaN	NaN	NaN	NaN
RAVER1	A0A087WZ13;E9PAU2;Q8IY67;K7EKR9	Ribonucleoprotein PTB-binding 1	NaN	-2.23573	NaN	NaN	NaN	NaN	NaN	NaN	NaN	NaN	NaN	NaN	NaN	NaN	NaN	NaN	NaN	NaN	NaN	NaN	NaN	NaN	NaN	NaN	NaN	NaN	0.500401	NaN	NaN	NaN	NaN	NaN	NaN	NaN	NaN	NaN	NaN	NaN	NaN	NaN	NaN	NaN	NaN	NaN	NaN	NaN
PLEKHA2	A0A087WZ32;A0A087X038;A8K727;Q9HB19;E5RHB5;B4DJG5	Pleckstrin homology domain-containing family A member 2	NaN	NaN	NaN	NaN	NaN	NaN	NaN	NaN	NaN	NaN	NaN	NaN	NaN	NaN	NaN	NaN	NaN	NaN	NaN	NaN	NaN	NaN	NaN	NaN	NaN	NaN	NaN	NaN	NaN	NaN	NaN	NaN	NaN	NaN	NaN	NaN	NaN	NaN	NaN	NaN	NaN	NaN	NaN	NaN	NaN	NaN
ALG9	B4DYW0;A0A087WZ62;Q9H6U8;H0YCW6;B4DQI3	Alpha-1,2-mannosyltransferase ALG9	NaN	NaN	NaN	NaN	NaN	NaN	NaN	NaN	NaN	NaN	NaN	NaN	NaN	NaN	NaN	NaN	NaN	NaN	NaN	NaN	NaN	NaN	NaN	NaN	NaN	NaN	0.778828	NaN	NaN	NaN	NaN	NaN	NaN	NaN	NaN	NaN	NaN	NaN	NaN	NaN	NaN	NaN	NaN	NaN	NaN	NaN
HMGN3	A0A087WZE9		-1.19101	-2.31013	-1.84314	-1.113	-1.95604	-1.31154	-0.442359	-1.80389	-0.46488	-1.22376	-3.72608	-2.38328	-1.26005	-0.842124	-0.673334	-1.0364	-0.413774	-0.726979	-1.16243	-2.01461	-2.45582	-1.10279	-2.28042	-0.567265	-0.844209	-1.64898	-1.27188	-2.01625	-1.17588	-1.50852	-0.520519	-0.211776	-0.683466	-2.12684	-1.22739	-1.73722	-0.323344	-1.36171	-1.25233	NaN	-0.921197	-0.395032	-1.33188	-0.504875	-1.04219	-1.07224
IDH3B	A0A087WZN1;O43837;A0A087X2E5	Isocitrate dehydrogenase [NAD] subunit, mitochondrial;Isocitrate dehydrogenase [NAD] subunit beta, mitochondrial	-0.0161862	-0.0810325	-0.71791	-0.419869	-1.10482	-0.666065	-0.57812	-0.885381	0.111401	-0.985436	-0.537678	-0.68317	-0.258727	-0.330421	-0.781898	-0.155882	-1.1148	-0.760303	-0.850921	-0.918533	-0.873726	-0.0538342	-0.905443	-0.262471	0.0932882	-0.50142	-0.696523	-0.416017	0.0107561	-0.328147	-0.69713	-0.121352	-0.292312	-0.190513	-0.163487	-0.841301	-0.43396	0.404164	0.111213	-0.339077	-0.477664	-0.851944	-1.11248	-0.170563	0.54939	0.391407
CADM1	A0A087X105;A0A087WZW4;A0A087X1W8;A0A0A0MTJ8;A0A087WZR6;X5D8W0;X5DQS5;X5DQR8;X5DNF2;X5D7A8;Q9BY67;A0A087X0T8;A0A4Z1	Cell adhesion molecule 1	-0.452337	0.445519	-0.51528	0.413959	-1.15768	NaN	-0.179256	-0.970712	-1.2255	-1.49431	-1.00888	0.27701	-1.29378	-1.05472	-0.681147	-0.727006	-0.0585003	-2.03005	-2.06191	-1.02358	-1.04858	-0.0282861	-0.413705	-0.977903	-1.27422	-0.65104	-0.373818	-1.29402	-0.384267	-0.708849	-0.941608	-0.902421	0.349292	-0.556738	-0.135403	-0.939888	-0.179001	-0.267726	NaN	-1.233	NaN	NaN	NaN	-1.92702	-0.641807	-0.573625
METTL7B	A0A087WZT2;Q6UX53	Methyltransferase-like protein 7B	NaN	NaN	NaN	NaN	NaN	NaN	NaN	NaN	NaN	NaN	NaN	NaN	NaN	NaN	NaN	NaN	NaN	NaN	NaN	NaN	NaN	NaN	NaN	NaN	-0.929412	NaN	NaN	NaN	NaN	NaN	NaN	NaN	NaN	NaN	NaN	NaN	NaN	NaN	NaN	NaN	NaN	NaN	NaN	NaN	NaN	NaN
CACNA1C	B7Z7Z5;A0A087WZV3;F5H522;A0A0A0MSA1;A0A0A0MR67;F5GY28;E9PDI6;Q13936	Voltage-dependent L-type calcium channel subunit alpha-1C	NaN	NaN	NaN	NaN	NaN	NaN	NaN	NaN	NaN	NaN	NaN	NaN	NaN	NaN	NaN	NaN	NaN	NaN	NaN	NaN	NaN	NaN	NaN	NaN	NaN	NaN	NaN	NaN	NaN	NaN	NaN	NaN	NaN	NaN	NaN	NaN	NaN	NaN	NaN	NaN	NaN	NaN	NaN	NaN	NaN	NaN
COL4A6	A8VPY0;B4DU54;F5H3Q5;B2RTX6;B7ZMM7;A0A087WZY5;F5H851;A8MXH5;Q14031;B4DZ39	Collagen alpha-6(IV) chain	NaN	-0.70814	NaN	NaN	NaN	NaN	NaN	NaN	NaN	NaN	NaN	0.776528	NaN	NaN	-0.439357	NaN	NaN	-2.60926	NaN	NaN	-0.945158	NaN	-0.674009	NaN	NaN	NaN	NaN	NaN	NaN	NaN	NaN	0.417656	NaN	NaN	NaN	NaN	NaN	NaN	NaN	NaN	NaN	NaN	NaN	NaN	NaN	NaN
HYOU1	A0A087X054;Q9Y4L1;B7Z2N4;B3KXH0;B7Z766;E9PJ21;Q05D91;A0A087WWI4;Q6IN67;K7EQK2;B7Z602	Hypoxia up-regulated protein 1	-0.423905	0.0188963	-0.289427	-0.0738713	0.366127	-0.0174958	0.433365	-0.383448	-0.410384	-0.15724	0.0078615	0.376102	-0.244382	-0.0762778	-0.441921	-0.679766	0.0784276	-0.468593	-0.10873	-0.0504999	-0.249418	0.189275	-0.667887	-0.438397	-0.700773	-0.486536	-0.00473507	-0.383318	-0.141588	-0.221612	-0.436657	-0.486529	-0.501471	-0.438828	-0.68456	-0.909948	-0.0999389	-0.505555	-0.592768	-0.679958	-0.614321	-0.0616547	-0.578512	-0.499849	-0.388246	-0.031371
WDR13	A0A087X091;Q6NXG4;Q9H1Z4;Q06DW9;B2RBN3	WD repeat-containing protein 13	NaN	0.902831	NaN	0.300003	1.79193	NaN	NaN	NaN	3.62497	0.108752	NaN	NaN	NaN	0.147234	0.381536	NaN	NaN	0.791376	NaN	NaN	NaN	NaN	1.22609	NaN	NaN	NaN	NaN	NaN	NaN	NaN	NaN	0.284792	2.1252	NaN	NaN	NaN	NaN	NaN	1.45722	NaN	NaN	NaN	NaN	NaN	NaN	2.91191
NPPA	A0A087X094;P01160	Natriuretic peptides A;Atrial natriuretic factor	0.158848	NaN	4.21818	NaN	4.00682	NaN	4.91058	NaN	NaN	NaN	-0.424398	6.03402	NaN	4.87961	NaN	NaN	4.6394	NaN	NaN	0.408752	NaN	4.914	NaN	NaN	NaN	NaN	3.54471	NaN	5.13714	NaN	NaN	4.23286	NaN	NaN	3.60899	NaN	5.42899	NaN	NaN	NaN	NaN	NaN	NaN	5.01234	NaN	6.09797
RBM26	A0A087X0H9;Q5T8P6	RNA-binding protein 26	NaN	1.56149	NaN	NaN	NaN	NaN	NaN	NaN	NaN	NaN	NaN	NaN	NaN	NaN	NaN	NaN	NaN	1.4243	NaN	NaN	NaN	NaN	NaN	NaN	NaN	NaN	NaN	NaN	NaN	NaN	NaN	NaN	1.55457	NaN	0.716457	NaN	NaN	NaN	NaN	NaN	NaN	NaN	NaN	NaN	NaN	NaN
MARK1	B4DIB3;X5D2M4;A0A087X0I6;Q9P0L2;X5DNR8;X5D7J4	Serine/threonine-protein kinase MARK1	NaN	NaN	NaN	NaN	NaN	NaN	NaN	NaN	NaN	NaN	NaN	NaN	NaN	NaN	NaN	NaN	NaN	NaN	NaN	NaN	NaN	NaN	NaN	NaN	NaN	NaN	NaN	NaN	NaN	NaN	NaN	NaN	NaN	NaN	NaN	NaN	NaN	NaN	NaN	NaN	NaN	NaN	NaN	NaN	NaN	NaN
COL15A1	A0A087X0K0;P39059;B3KTP7	Collagen alpha-1(XV) chain;Restin;Restin-2;Restin-3;Restin-4	NaN	4.71623	NaN	3.0386	NaN	NaN	1.76253	NaN	NaN	4.42573	3.49068	4.77268	NaN	3.45525	3.80821	2.02402	NaN	NaN	3.47206	NaN	NaN	NaN	NaN	1.75018	2.56711	3.60925	4.75819	NaN	2.02962	2.21417	3.04134	4.24932	NaN	1.94531	NaN	3.66869	2.09975	1.44135	3.62801	2.68529	3.1171	3.87143	2.59498	NaN	NaN	3.9622
SLC4A1AP	A0A087X0M4;A0A087WWF4;B4DV74;Q9BWU0	Kanadaptin	NaN	NaN	NaN	NaN	NaN	NaN	NaN	NaN	NaN	NaN	NaN	NaN	NaN	NaN	NaN	NaN	NaN	NaN	NaN	NaN	NaN	NaN	NaN	NaN	NaN	NaN	NaN	NaN	NaN	NaN	NaN	NaN	NaN	NaN	NaN	NaN	NaN	NaN	NaN	NaN	NaN	NaN	NaN	NaN	NaN	NaN
YTHDF3;DKFZp451J085;DKFZp451A052	A0A087X0Q1;Q7Z739;Q8NA80;A0A024R7W5;B4DPX9;A0A087WY31;Q658Z6;Q8N3V9;Q96MZ5	YTH domain-containing family protein 3	NaN	NaN	NaN	NaN	NaN	NaN	NaN	NaN	NaN	NaN	0.800425	NaN	NaN	NaN	NaN	NaN	NaN	NaN	NaN	NaN	NaN	NaN	NaN	NaN	NaN	NaN	NaN	NaN	NaN	NaN	NaN	NaN	NaN	NaN	NaN	NaN	NaN	NaN	NaN	NaN	NaN	NaN	NaN	NaN	NaN	NaN
SNX12	Q3SYF1;A0A087X0R6;Q9UMY4	Sorting nexin-12	NaN	-0.875128	0.709953	-0.525668	0.788913	0.411675	NaN	-0.793894	NaN	0.0551826	-1.02226	-1.05073	-0.406319	-0.0783365	-0.82647	-1.10644	NaN	-0.77127	-0.579081	-0.504366	-0.519441	-0.023138	-1.82191	-0.551393	-0.0992279	-0.752535	-0.395063	-1.67627	-1.77628	NaN	-1.44167	NaN	-0.64322	-1.24566	-1.36547	-0.503451	-0.295958	NaN	-1.18769	-0.559736	-1.28048	-0.620347	-0.587311	NaN	-1.46975	-0.934554
COL6A1	A0A087X0S5;P12109;Q8TBN2	Collagen alpha-1(VI) chain	3.24467	3.11855	2.52114	2.9461	3.46973	4.10447	4.55657	4.03822	3.0964	3.82439	5.43886	5.26206	3.50853	4.16854	3.4812	2.59386	5.37788	3.30363	4.60046	3.99168	3.89293	4.5249	4.2245	4.55241	3.76937	3.07106	4.27697	3.54635	4.26269	2.93631	3.32875	3.81897	3.40927	3.79854	4.90724	3.56168	5.22142	4.27016	3.86052	3.26603	4.2677	6.14585	4.79786	4.35879	5.29958	5.37377
MYH7B	A0A087X0T3		NaN	-0.24987	4.0606	NaN	NaN	NaN	NaN	-2.24759	NaN	NaN	NaN	NaN	0.0392215	NaN	NaN	NaN	NaN	NaN	NaN	NaN	NaN	NaN	NaN	NaN	NaN	NaN	NaN	NaN	NaN	-1.26033	NaN	NaN	NaN	NaN	NaN	NaN	NaN	NaN	NaN	-0.274411	NaN	NaN	NaN	NaN	NaN	NaN
ACOT2	A0A087X0W7;A0A087WT95;P49753;B3KSA0	Acyl-coenzyme A thioesterase 2, mitochondrial	0.0753528	NaN	NaN	NaN	NaN	NaN	NaN	-0.14163	0.367248	0.33228	NaN	0.379827	NaN	NaN	NaN	NaN	NaN	NaN	-0.328722	NaN	0.41997	NaN	0.348445	-0.570366	NaN	-0.394185	NaN	NaN	NaN	NaN	NaN	NaN	NaN	NaN	NaN	NaN	NaN	NaN	NaN	-0.50284	NaN	NaN	NaN	NaN	NaN	NaN
RELA	Q2TAM5;E9PKH5;B4E082;A0A087X0W8;Q04206;E9PI38;E9PQS6;Q96F54;E9PKV4;Q96CP1;A0A087WVP0	Transcription factor p65	NaN	0.0986651	NaN	NaN	1.15966	NaN	NaN	NaN	NaN	NaN	NaN	NaN	0.347512	NaN	NaN	NaN	NaN	-1.06005	NaN	NaN	NaN	NaN	-0.828469	0.652811	NaN	NaN	NaN	NaN	NaN	NaN	NaN	-1.51076	0.159235	NaN	-0.281699	-0.584	NaN	NaN	-0.0508282	NaN	NaN	0.588053	NaN	NaN	NaN	-0.364236
DHRS7;DKFZp564H1664	A0A087X0Z7;H0YJ66;Q9Y394;Q659E8;H0YJE4	Dehydrogenase/reductase SDR family member 7	NaN	-0.0439044	NaN	NaN	-0.294665	NaN	NaN	NaN	-1.06543	NaN	1.2381	1.19743	NaN	NaN	NaN	NaN	NaN	NaN	NaN	NaN	NaN	NaN	NaN	0.265206	NaN	NaN	NaN	NaN	NaN	0.421527	NaN	NaN	NaN	NaN	NaN	NaN	NaN	NaN	NaN	NaN	NaN	NaN	NaN	0.659267	NaN	-0.427606
NOMO1	A0A0G2JN29;A0A087X117;Q15155;A0A0G2JP90;A0A087WW46	Nodal modulator 1	-0.0552891	1.2057	0.157399	0.377864	0.542267	0.25492	0.652992	0.448355	0.300266	-0.233275	0.0760731	0.319774	1.13756	-0.134352	-0.943281	0.227253	1.70684	0.316739	-0.311185	0.429749	NaN	-0.11063	-0.235044	0.519032	-0.0873072	-0.578744	-0.220781	-0.222928	0.139402	-1.28624	-0.964879	-1.10535	-0.556597	-0.574331	-0.331581	-0.376594	-0.510382	-1.04827	-0.407173	-0.491186	-0.547845	NaN	-1.3801	-0.901649	-0.432746	-0.203856
STAU1	A0A087X1A5;Q5JW30;A8K622;Q59F99;O95793;B3KRE0	Double-stranded RNA-binding protein Staufen homolog 1	0.967026	0.920898	0.311932	0.917014	0.586099	0.468875	1.26992	0.833502	0.440759	0.896356	0.75998	0.825798	0.292416	1.07978	0.914349	0.00575033	0.0355052	0.513148	0.0236657	0.807896	1.08535	1.44805	0.265179	0.423128	-0.317536	-0.42544	1.08216	NaN	0.193162	0.791408	-0.220825	1.23549	0.370802	-0.608865	0.242635	0.543026	1.84048	NaN	-0.0881416	NaN	NaN	0.082362	0.127872	NaN	0.703337	0.211598
CORIN	A0A087X1D5;J3KR88;B4E1Y7;J3KR90;Q9Y5Q5;Q8IZR7;B7Z4R1;J3KR83;B4E2W9;E7EQE7;B4DZA3	Atrial natriuretic peptide-converting enzyme;Atrial natriuretic peptide-converting enzyme, N-terminal propeptide;Atrial natriuretic peptide-converting enzyme, activated protease fragment;Atrial natriuretic peptide-converting enzyme, 180 kDa soluble fragment;Atrial natriuretic peptide-converting enzyme, 160 kDa soluble fragment;Atrial natriuretic peptide-converting enzyme, 100 kDa soluble fragment	NaN	NaN	NaN	NaN	NaN	NaN	NaN	NaN	NaN	NaN	NaN	NaN	NaN	NaN	NaN	NaN	NaN	NaN	NaN	NaN	NaN	NaN	NaN	NaN	NaN	NaN	NaN	NaN	NaN	NaN	NaN	NaN	NaN	NaN	NaN	NaN	NaN	NaN	NaN	NaN	NaN	NaN	NaN	NaN	NaN	NaN
ARFIP2	B4DXH2;B4DUZ3;A0A087X1E4;P53365	Arfaptin-2	NaN	NaN	NaN	NaN	NaN	NaN	NaN	NaN	NaN	NaN	NaN	NaN	NaN	NaN	NaN	NaN	NaN	NaN	NaN	NaN	NaN	NaN	NaN	NaN	NaN	NaN	NaN	NaN	NaN	NaN	NaN	NaN	NaN	NaN	NaN	NaN	NaN	NaN	NaN	NaN	NaN	NaN	NaN	NaN	NaN	NaN
2018-09-15	A0A087X1G7;A0A0B4J1S4;O60613	15 kDa selenoprotein	NaN	NaN	NaN	NaN	NaN	NaN	NaN	NaN	NaN	NaN	1.09007	NaN	NaN	NaN	NaN	NaN	NaN	NaN	NaN	NaN	NaN	NaN	NaN	NaN	NaN	NaN	NaN	NaN	NaN	NaN	NaN	NaN	NaN	NaN	NaN	NaN	NaN	NaN	NaN	NaN	NaN	NaN	NaN	NaN	NaN	NaN
GPX3	A0A087X1J7;P22352	Glutathione peroxidase;Glutathione peroxidase 3	2.96838	NaN	3.50594	2.8831	2.83557	NaN	NaN	NaN	NaN	NaN	NaN	NaN	NaN	4.04702	NaN	1.89314	NaN	NaN	3.84859	4.14852	4.4877	5.42787	2.77201	2.43113	NaN	2.45973	4.33957	NaN	4.66181	NaN	2.68882	4.14635	4.44703	NaN	4.23958	NaN	4.71057	4.01351	4.41251	NaN	NaN	4.39138	NaN	NaN	5.00796	4.26968
LYPLA1	A0A087X1K9;E5RGR0;Q6IAQ1;B4DJV9;O75608;B4DP64	Acyl-protein thioesterase 1	-0.222565	1.22692	-0.877869	0.700826	-0.0776084	0.495207	0.30424	0.0366886	-0.0502812	0.750543	-0.234025	0.265744	-0.32458	NaN	-0.481402	-0.416299	-0.0142124	-0.802152	-0.295018	-0.639749	-0.521195	NaN	-0.29725	-0.0152121	-0.869074	-0.77215	0.235331	-0.661411	-0.641731	-0.508834	-0.694568	0.00613001	-0.551715	-0.841087	-0.41846	-0.850883	-0.501923	-1.07731	-0.427523	-0.790689	-0.777986	-0.526136	-1.01164	-0.766182	-1.24099	-0.592463
PSME2	Q86SZ7;Q2TNB3;A0A087X1Z3;Q9UL46;H0YM70;Q6FHK9	Proteasome activator complex subunit 2	-0.65986	-1.66369	-1.39313	-1.39393	-1.65194	-0.929359	-0.554595	-0.927898	-0.372952	-0.4952	-0.549477	-0.238869	-1.02041	-0.205197	-1.29392	-1.59697	0.395985	-1.70606	-0.641266	-0.507084	-0.716805	-0.711827	-0.853017	-0.0858582	-0.992353	-0.927677	-0.651499	-0.544874	-0.443322	-0.853082	-0.747344	-0.567126	-1.12968	-0.675978	-0.162192	-0.98361	-0.548119	-1.15124	-0.706228	-0.847382	-0.486767	-0.0445973	-0.786541	-0.472983	-0.820242	-0.544199
AGRN	A0A087X208;O00468	Agrin;Agrin N-terminal 110 kDa subunit;Agrin C-terminal 110 kDa subunit;Agrin C-terminal 90 kDa fragment;Agrin C-terminal 22 kDa fragment	1.72221	0.816872	0.492922	0.823652	1.00552	0.611611	1.20609	1.19329	1.19533	0.527463	1.64641	2.02398	1.74827	1.18244	0.655483	0.280438	0.987095	0.57643	0.643549	1.11061	1.50294	2.08152	0.820865	0.734487	1.31109	0.834141	1.69756	0.529743	1.6694	0.508476	1.22212	1.25628	0.614909	1.39328	1.77458	0.938249	1.83115	1.11943	1.28159	0.346887	1.3381	1.50778	0.420449	1.10758	2.02585	1.42795
MRPL45	A0A087X2D5;B4DEF8;Q9BRJ2;A0A0G2JMS5;A0A087WU62	39S ribosomal protein L45, mitochondrial	0.623354	0.467793	0.00109683	NaN	1.38764	NaN	NaN	NaN	0.457593	NaN	NaN	NaN	0.166859	NaN	NaN	NaN	NaN	NaN	-0.101247	NaN	NaN	NaN	NaN	-0.704164	NaN	-0.590916	-0.687329	NaN	NaN	NaN	NaN	-0.107018	0.159476	NaN	-0.0723115	-0.804149	NaN	NaN	-0.0312558	-0.751549	NaN	0.0983974	NaN	NaN	NaN	NaN
SPAG9	A0A087X2D8;O60271;B4DS36;Q5JB53	C-Jun-amino-terminal kinase-interacting protein 4	NaN	-0.0153549	NaN	NaN	NaN	NaN	NaN	NaN	0.556818	0.333443	2.072	NaN	0.320054	NaN	NaN	NaN	NaN	-1.8722	NaN	NaN	NaN	NaN	NaN	NaN	NaN	0.644533	NaN	NaN	NaN	NaN	NaN	NaN	0.783738	NaN	-0.107152	NaN	NaN	NaN	NaN	NaN	NaN	NaN	NaN	NaN	NaN	NaN
HEL-S-73;PSMC6	V9HW24;A0A087X2I1;P62333	26S protease regulatory subunit 10B	-0.287275	-0.486529	-0.799692	-0.365406	0.301639	-0.231497	0.0917274	-0.391488	0.0952866	-1.13237	-0.772103	-0.285474	-0.0636889	0.16567	-0.433853	-0.726827	0.503513	-0.459268	-0.0823766	-0.708211	-0.788918	-0.0439953	-0.680624	-0.0800175	-0.851547	-1.19082	-0.565834	-1.01777	-0.922123	-0.603384	-1.22743	-0.722188	-0.813525	-0.875423	-0.83489	-1.07298	-0.550926	-0.796349	-0.486969	-0.693771	-0.392938	-0.519859	-1.16908	-1.0547	-1.16683	0.00477469
SCRN1	A0A090N7T9;Q12765;A0A024RA21;B4DH22;C9K052	Secernin-1	-1.04399	-0.554488	-0.696338	-0.696018	-0.574109	-1.31447	0.135515	-1.12966	-0.587708	-0.79106	-0.530837	-0.0801453	-0.476942	-0.421465	-1.0869	-0.818393	-0.143402	-0.935314	-0.85759	-1.04764	-0.690761	-0.390817	-0.798449	-0.972729	-1.41667	-1.31182	-0.308231	-0.835922	-0.613906	-0.766152	-0.704522	-0.159774	-0.419362	-0.478272	0.265755	-1.31706	-0.509179	-1.19482	-0.357066	-1.54637	-1.07831	-0.582553	-1.83843	-0.457288	-1.179	-1.03367
CUL1	B4DLA3;A0A0C4DGX4;A0A090N7U0;Q13616;Q75MQ1;B3KTW0	Cullin-1	0.565482	-0.145221	-0.362329	NaN	0.40048	-0.893451	NaN	-1.15778	NaN	NaN	-1.26183	NaN	-1.79954	NaN	NaN	NaN	-0.751549	-1.22558	0.0140647	0.261509	NaN	-1.34307	0.110684	-0.627607	NaN	NaN	0.300146	NaN	NaN	NaN	NaN	-0.935535	NaN	NaN	NaN	NaN	NaN	NaN	NaN	NaN	NaN	NaN	NaN	NaN	NaN	NaN
C7orf24;GGCT	A0A090N7V5;O75223;M0QZK8;B8ZZK2;B3KMN7	Gamma-glutamylcyclotransferase	0.655357	0.773938	0.572082	0.847363	0.225435	-0.76757	2.43077	1.06557	0.928842	-0.0413231	0.71022	0.0141414	1.11343	-0.0218692	-0.322159	-1.09936	1.30126	-0.359873	0.611948	0.780802	-0.657823	-0.642378	1.0963	1.40049	-0.644261	-0.349019	-0.145521	-0.359071	-0.0801408	0.00848433	-0.380294	-0.434623	-0.215492	-0.328093	-0.353662	-0.116521	-0.717508	-0.446445	0.330501	-0.303188	NaN	0.208011	0.45176	-0.572793	NaN	-0.795606
GARS	A0A090N8G0		-0.571352	0.163659	-0.870042	-0.118048	0.430268	-0.26009	-0.848539	-1.57505	-0.181901	-0.19845	-0.0404349	0.358542	0.0389368	-0.043367	-0.410084	-0.986821	0.262678	0.0188481	-0.268007	-0.446997	-0.800599	0.551247	0.553271	-0.076869	1.24503	-0.785703	-0.106391	-1.24499	0.253945	-0.398547	-0.168253	-0.225178	-0.301073	-0.447269	-0.193721	-0.981537	-0.313761	-0.807831	-0.203919	-0.807694	-0.765148	0.064578	0.0657524	-0.191714	-0.180561	-0.221815
FKBP9	B3KQQ0;A0A090N8P3;O95302;B7Z230;B7Z1U8	Peptidyl-prolyl cis-trans isomerase FKBP9	NaN	-0.623118	NaN	NaN	-0.646353	-0.024887	0.57079	NaN	-0.960141	NaN	NaN	-0.312814	-0.0326651	-0.551067	-1.19931	NaN	-0.786968	NaN	-0.223917	-1.24428	-0.090447	-0.364348	NaN	-0.781821	-0.863542	-1.36977	-1.0224	NaN	NaN	NaN	NaN	-1.59665	NaN	NaN	-0.949841	-1.5756	-0.284869	NaN	-0.995955	NaN	-0.325386	0.126407	-0.564524	-0.660682	NaN	NaN
PRKAG2	B7Z6X8;E9PGP6;A0A090N8Q6;Q9UGJ0	5-AMP-activated protein kinase subunit gamma-2	0.845732	-0.540853	-0.793929	0.381527	0.258046	1.04732	0.954338	1.24834	-0.102632	0.108677	0.858464	0.817962	0.573334	0.243458	0.884149	0.522375	0.841741	0.672209	0.387194	0.343939	0.582801	2.00217	-0.192928	0.632786	0.092071	0.0814539	0.42295	-0.0833526	0.664474	0.0502773	0.571295	-0.241191	-0.162792	0.513181	0.00123152	-0.171252	-0.175805	-0.18959	-0.148863	-0.26646	0.668552	-0.00819871	-0.52466	-0.588608	0.966867	-0.0633306
ERP70;PDIA4	A0A090N8Y2;P13667	Protein disulfide-isomerase A4	-0.399503	-0.0433762	-2.93438	0.167879	-0.134988	-0.277646	-1.19665	-2.94478	-0.27124	-3.00128	-0.47243	-0.26425	-0.292019	-0.216973	-0.497393	-0.72882	0.205703	-0.420254	-0.708248	-0.361819	-1.66656	-0.197432	-0.0964034	-0.293812	-1.01287	-0.541758	-0.492341	-0.834711	-2.91708	-1.21152	-1.20319	-0.766133	-0.443016	-1.11465	-0.440883	-0.552813	-0.598005	-1.2125	-0.641916	-1.10988	-0.67603	-0.542734	-1.21913	-1.07355	-1.46851	-0.365438
LSM5	B8ZZF8;A0A090N8Y5;Q9Y4Y9	U6 snRNA-associated Sm-like protein LSm5	NaN	0.642009	NaN	NaN	0.893384	NaN	NaN	NaN	NaN	NaN	NaN	-0.496923	-1.80037	NaN	-1.6089	NaN	-0.852478	-0.0129261	NaN	NaN	NaN	-0.562084	-1.53413	NaN	NaN	NaN	-0.989037	NaN	NaN	NaN	NaN	NaN	NaN	NaN	NaN	NaN	NaN	NaN	NaN	NaN	NaN	NaN	NaN	NaN	NaN	NaN
SMARCD3	B3KXL9;A0A090N8Z9;Q6STE5	SWI/SNF-related matrix-associated actin-dependent regulator of chromatin subfamily D member 3	NaN	NaN	NaN	NaN	NaN	NaN	0.257856	NaN	NaN	NaN	NaN	NaN	NaN	NaN	NaN	NaN	NaN	NaN	NaN	0.190701	-0.160404	NaN	NaN	NaN	NaN	NaN	NaN	NaN	NaN	-0.210514	NaN	NaN	NaN	NaN	NaN	NaN	NaN	NaN	NaN	NaN	NaN	NaN	0.356864	1.15711	NaN	NaN
RHEB	Q6NZ61;A8K005;A0A090N900;Q15382;C9J931	GTP-binding protein Rheb	NaN	2.67955	NaN	1.69152	1.49716	NaN	NaN	-0.032383	1.48233	1.59789	0.715249	1.71146	2.42213	1.276	-0.657366	NaN	1.46116	1.43195	NaN	NaN	NaN	NaN	-0.752577	-0.997256	NaN	NaN	1.29811	NaN	-0.556111	0.139093	0.282614	NaN	0.351866	0.883635	NaN	0.528324	0.046191	-0.224905	NaN	-0.265782	0.450321	-0.696172	NaN	NaN	-0.643025	NaN
AAK1	L0R804;A0A096LP25;Q6ZSR9;A0A096LNZ0	Uncharacterized protein FLJ45252	NaN	NaN	NaN	NaN	NaN	NaN	NaN	NaN	NaN	NaN	NaN	NaN	NaN	NaN	NaN	NaN	NaN	NaN	NaN	NaN	NaN	NaN	NaN	NaN	NaN	-0.211511	1.074	NaN	NaN	NaN	NaN	1.72176	NaN	NaN	NaN	NaN	NaN	NaN	NaN	NaN	NaN	NaN	NaN	NaN	NaN	NaN
FAM21A;FAM21C	F8W7U3;J3KP36;E7ESD2;B7ZME8;A8K5W5;A0A0A0MR88;A0A096LPC5;Q9Y4E1;Q641Q2;B4DPK9;Q9NVB8;B4DF48;A0A087WYF6	WASH complex subunit FAM21C;WASH complex subunit FAM21A	NaN	NaN	NaN	NaN	NaN	NaN	NaN	NaN	NaN	NaN	NaN	NaN	1.15837	NaN	NaN	NaN	NaN	NaN	NaN	NaN	NaN	NaN	NaN	NaN	NaN	NaN	NaN	NaN	NaN	NaN	NaN	NaN	NaN	NaN	NaN	NaN	NaN	NaN	NaN	NaN	NaN	NaN	NaN	NaN	NaN	NaN
C21orf33	A0A140VKB0;A0A0B4J2D5;A0A096LPI6;P30042;A0A096LNH5;A0A0B4J2H4;H7C1F6;H7C2G3	ES1 protein homolog, mitochondrial	0.624158	0.260035	-0.201362	0.36213	0.190505	-0.0813649	0.769341	0.289786	0.291263	0.321225	0.353686	0.670312	-0.206712	0.334574	0.288681	0.531695	0.79695	0.467634	0.127914	-0.303081	0.109767	0.180889	0.315126	-0.0129342	-0.0988923	0.608843	0.465222	0.234526	0.123097	0.365875	0.0931302	-0.172641	0.304746	0.255086	0.368866	0.610011	0.528296	0.279303	0.396242	0.418525	0.477177	-0.232936	0.5348	-0.0218112	0.508577	-0.0135163
ENAH	A8K2B4;A0A097PID1;A0A097PIC4;A0A0U1RRM6;Q8N8S7;A0A075B6E5	Protein enabled homolog	NaN	NaN	NaN	NaN	NaN	NaN	NaN	0.350541	NaN	NaN	0.421863	NaN	NaN	NaN	NaN	NaN	NaN	NaN	2.29541	3.13277	NaN	NaN	NaN	NaN	NaN	NaN	NaN	NaN	NaN	NaN	NaN	NaN	NaN	NaN	NaN	NaN	NaN	NaN	NaN	NaN	NaN	NaN	NaN	NaN	NaN	NaN
COX2;COII;cox2;MT-CO2	Q7Y6N0;Q4GVP5;C8YBL1;A0A097PWR7;Q14XT3;X2D4U2;H9E7F7;H9E7P8;A0A1B1PEQ8;H9E7W2;H9E7T7;H9PDV6;X5C6M5;X5BKA4;X2CK15;W8DFH5;W8DBX9;W8D1X2;V9K571;V9JPM6;V9J3S1;U5Z9R9;U5Z487;U3LSI8;U3L556;T1SWS8;T1Q632;S4STI1;R9Y412;Q9B2U8;Q9B138;Q8WCW3;Q8HNR1;Q85KS0;Q7YCE6;Q7Y6M3;Q6VJJ3;Q6VJD8;Q6VIG7;Q6RQ80;Q6RNN7;Q6RKW8;Q6R0V6;Q5SB08;Q5SAP1;Q5SA98;Q5S971;Q4GQP0;Q4GHE1;Q4GCZ4;Q4GCG2;Q4GCC3;Q4F4V6;Q4EZD4;Q305H0;Q19MP7…	Cytochrome c oxidase subunit 2	0.716318	0.730161	1.61986	0.0170441	0.912757	0.819889	-0.323532	-0.0835342	0.472766	-0.0471049	1.31211	-0.213084	0.7262	0.318288	0.177592	1.11228	-0.418045	1.14845	0.726214	0.864389	1.4259	0.42166	0.689454	0.99491	1.87814	1.15936	0.901595	1.20251	0.807781	1.13092	0.6318	0.865595	0.732103	0.721179	1.80524	1.29109	0.831109	0.794145	1.34208	1.15006	0.853446	1.23774	0.966767	1.12507	1.11735	1.58185
MARK3	A0A0A0MQR8;A0A0A0MT23;P27448;A0A0A0MSZ1;J3KNR0;H0YNV4;A0A0A0MST9	MAP/microtubule affinity-regulating kinase 3	NaN	NaN	NaN	NaN	NaN	NaN	NaN	NaN	NaN	NaN	NaN	NaN	NaN	NaN	NaN	NaN	NaN	NaN	NaN	NaN	NaN	NaN	NaN	NaN	NaN	NaN	NaN	NaN	NaN	NaN	NaN	NaN	NaN	NaN	NaN	NaN	NaN	NaN	NaN	NaN	NaN	NaN	NaN	NaN	NaN	NaN
WDR18	U3KQC1;A0A0A0MQU0;Q9BV38;K7EIR0	WD repeat-containing protein 18	NaN	NaN	NaN	NaN	NaN	NaN	NaN	NaN	NaN	NaN	NaN	NaN	NaN	-0.422341	NaN	NaN	NaN	NaN	NaN	1.04442	NaN	NaN	NaN	-0.0554733	-0.1153	NaN	NaN	NaN	NaN	NaN	NaN	NaN	NaN	NaN	NaN	NaN	NaN	NaN	NaN	NaN	NaN	NaN	NaN	NaN	NaN	NaN
SCLY	B4DVB4;B4DDP9;A0A0A0MQU4;Q96I15;H7C1S7;H7C3V9;H7C277	Selenocysteine lyase	NaN	NaN	NaN	NaN	1.32561	NaN	NaN	NaN	NaN	NaN	NaN	NaN	0.632377	NaN	NaN	NaN	NaN	NaN	NaN	NaN	NaN	NaN	NaN	NaN	NaN	NaN	NaN	NaN	NaN	NaN	NaN	NaN	NaN	NaN	NaN	NaN	NaN	NaN	NaN	NaN	NaN	NaN	NaN	NaN	NaN	NaN
MYEF2	A0A0A0MQW0;A0A0A0MR39;A0A087WUT0;Q9P2K5;A0A024R5Q6	Myelin expression factor 2	0.518205	-1.08427	NaN	NaN	-0.828728	-1.01635	-0.921436	0.661143	-0.86671	-0.621712	NaN	NaN	1.07091	-0.814345	-1.31081	NaN	-1.1103	NaN	NaN	NaN	NaN	-1.13543	NaN	NaN	-1.23646	NaN	0.136202	NaN	NaN	NaN	-0.708143	NaN	-0.659559	NaN	NaN	NaN	0.920898	NaN	NaN	NaN	NaN	NaN	NaN	NaN	NaN	NaN
SPOCK1;SPOCK3	D3DQB3;A0A0A0MQX7;Q08629;E7ENT7;B4DI52;A0A0A0MTJ2;B4DFW5;Q9BQ16	Testican-1;Testican-3	NaN	NaN	NaN	NaN	NaN	NaN	NaN	NaN	NaN	NaN	NaN	NaN	NaN	NaN	NaN	NaN	NaN	NaN	NaN	NaN	NaN	NaN	NaN	NaN	NaN	NaN	NaN	NaN	NaN	NaN	NaN	NaN	NaN	NaN	NaN	NaN	NaN	NaN	NaN	NaN	NaN	NaN	NaN	NaN	NaN	NaN
MBNL1;MBLL;MBNL2	C9JP00;A0A0A0MQX8;Q9NR56;O95205;A0PJJ3;H7C4T5;A2A3S3;Q5VZF2	Muscleblind-like protein 1;Muscleblind-like protein 2	NaN	NaN	NaN	NaN	NaN	NaN	NaN	NaN	NaN	NaN	NaN	NaN	NaN	NaN	NaN	NaN	NaN	NaN	NaN	NaN	NaN	NaN	NaN	NaN	NaN	-0.80091	NaN	NaN	NaN	NaN	NaN	NaN	NaN	NaN	NaN	-0.864097	NaN	NaN	0.494353	NaN	NaN	NaN	NaN	NaN	NaN	NaN
PDLIM3	A0A0A0MQY0;Q53GG5;A0A087WYF8	PDZ and LIM domain protein 3	-1.96682	-0.0407419	0.428895	-1.11811	-0.956503	-2.01535	-1.11011	-0.498251	-3.15813	-1.76614	-2.37798	-1.45911	-3.07085	-2.16996	-1.66161	-1.9672	-1.62725	-1.65323	-1.08135	-1.19835	NaN	-2.02848	-1.38267	-1.84171	-2.14638	-2.33434	-0.655586	-3.66358	NaN	-1.5007	NaN	-1.12628	-0.854938	-2.22484	-0.490683	-2.19011	NaN	-2.08849	-1.29715	-0.80331	-0.732183	-1.63315	-1.41526	NaN	-3.67593	-1.41665
PPM1K	A0A0A0MQZ4;Q8N3J5;V9GY69	Protein phosphatase 1K, mitochondrial	NaN	NaN	NaN	NaN	NaN	NaN	NaN	NaN	NaN	NaN	NaN	NaN	NaN	NaN	NaN	NaN	NaN	NaN	NaN	NaN	NaN	NaN	NaN	NaN	NaN	NaN	NaN	NaN	NaN	NaN	NaN	NaN	NaN	NaN	NaN	NaN	NaN	NaN	NaN	NaN	NaN	NaN	NaN	NaN	NaN	NaN
MLST8	H3BM50;H3BPU5;B4E2R3;H3BR25;H3BPT1;H3BN58;H3BSZ4;A0A0A0MR05;Q9BVC4;H3BR38	Target of rapamycin complex subunit LST8	NaN	NaN	NaN	NaN	NaN	NaN	NaN	NaN	NaN	NaN	NaN	NaN	NaN	NaN	NaN	NaN	NaN	NaN	NaN	NaN	NaN	NaN	NaN	NaN	NaN	NaN	NaN	NaN	NaN	NaN	NaN	NaN	NaN	NaN	NaN	NaN	NaN	NaN	NaN	NaN	NaN	NaN	NaN	NaN	NaN	NaN
RER1	Q5T092;A0A0A0MR06;Q5T091;Q5T094;Q9P0H9;O15258;Q5T093;Q6IBJ7	Protein RER1	NaN	NaN	NaN	NaN	NaN	NaN	NaN	NaN	NaN	NaN	NaN	NaN	NaN	NaN	NaN	NaN	NaN	NaN	NaN	NaN	NaN	NaN	NaN	NaN	NaN	NaN	NaN	NaN	NaN	NaN	NaN	NaN	NaN	NaN	NaN	NaN	NaN	NaN	NaN	NaN	NaN	NaN	NaN	NaN	NaN	NaN
GSTZ1	A0A0A0MR33;G3V5T0;A0A0C4DFM0;G3V4T6;G3V267;B2RDN1;O43708	Maleylacetoacetate isomerase	NaN	NaN	NaN	NaN	NaN	NaN	NaN	NaN	NaN	NaN	NaN	1.36301	NaN	NaN	NaN	NaN	NaN	0.00296057	NaN	NaN	NaN	NaN	NaN	NaN	NaN	NaN	NaN	NaN	NaN	NaN	NaN	NaN	NaN	NaN	-0.477885	NaN	NaN	NaN	NaN	NaN	NaN	NaN	NaN	NaN	NaN	NaN
DKFZp686E2459;RBM10	A0A0S2Z4X1;A0A0S2Z4W4;Q7Z3D7;A0A0A0MR66;P98175;Q6PKH5	RNA-binding protein 10	NaN	NaN	0.450774	1.15447	NaN	NaN	NaN	NaN	NaN	NaN	NaN	NaN	1.82153	0.488695	NaN	NaN	NaN	NaN	0.16942	0.516264	NaN	NaN	0.853795	-1.39072	NaN	NaN	-0.1149	NaN	NaN	NaN	-2.23217	1.65399	-0.816723	0.930463	0.361878	-1.66111	NaN	NaN	-0.848317	-1.46221	NaN	NaN	NaN	NaN	NaN	NaN
DGAT1	A0A0A0MR74;O75907	Diacylglycerol O-acyltransferase 1	NaN	NaN	NaN	NaN	NaN	NaN	NaN	NaN	NaN	NaN	NaN	NaN	NaN	NaN	NaN	NaN	NaN	NaN	NaN	NaN	NaN	NaN	NaN	NaN	NaN	NaN	NaN	NaN	NaN	NaN	NaN	NaN	NaN	NaN	NaN	NaN	NaN	NaN	NaN	NaN	NaN	NaN	NaN	NaN	NaN	NaN
EPB41L3	A0A0A0MRA8;Q9Y2J2;A0A0A0MSA4;A0A1B0GTF8;B7Z8M8	Band 4.1-like protein 3;Band 4.1-like protein 3, N-terminally processed	-0.346188	0.570574	-0.806975	-0.268281	0.124711	-0.127427	-0.140394	0.229766	-0.0168197	-0.00422984	0.556961	0.165585	0.0695679	-0.441397	0.230468	-0.290603	-0.174775	0.224449	-0.0272833	0.26043	-0.318231	-0.0944322	-0.256473	-0.2507	-0.495183	-0.333798	0.0271689	-0.665174	-0.799411	-0.700909	-0.477366	-0.624537	-0.547644	-0.422075	-0.407153	-0.750317	-0.517015	-1.22975	-0.469725	-1.29792	-0.71636	-0.680941	-0.947854	-2.11257	-1.1531	-0.59167
ASAP1	E5RHD7;A0A0A0MRE5;Q9ULH1	Arf-GAP with SH3 domain, ANK repeat and PH domain-containing protein 1	NaN	NaN	NaN	NaN	NaN	NaN	NaN	NaN	NaN	NaN	-1.71352	NaN	NaN	NaN	NaN	NaN	NaN	NaN	NaN	NaN	NaN	NaN	NaN	NaN	NaN	NaN	NaN	NaN	NaN	NaN	NaN	NaN	NaN	NaN	NaN	NaN	NaN	NaN	NaN	NaN	NaN	NaN	NaN	NaN	NaN	NaN
APP	H7C0V9;B4DJT9;A0A0A0MRG2;B4DQM1;E9PG40;B4DGD0;A0A140VJC8;P05067;B4DM00;B4DMD5	Amyloid beta A4 protein;N-APP;Soluble APP-alpha;Soluble APP-beta;C99;Beta-amyloid protein 42;Beta-amyloid protein 40;C83;P3(42);P3(40);C80;Gamma-secretase C-terminal fragment 59;Gamma-secretase C-terminal fragment 57;Gamma-secretase C-terminal fragment 50;C31	0.731087	0.904245	NaN	0.89139	NaN	-0.0521377	0.616171	0.271601	NaN	NaN	NaN	2.68501	0.400111	NaN	0.0720277	-0.647729	0.00284488	0.0746233	NaN	3.1674	1.54785	NaN	-0.0384361	NaN	-0.589859	-0.37128	NaN	-0.28948	-0.428242	NaN	NaN	NaN	0.354889	NaN	NaN	-0.62653	NaN	NaN	0.416442	NaN	0.729268	-0.254836	NaN	NaN	NaN	NaN
BAK;BAK1;DKFZp686D0345	Q8NFF3;A0A0A0MRG8;A8K7S8;A0A0S2Z391;A0A0S2Z319;Q16611;B4E0L2;B3KRK7;B4DEB4;Q5HCI0	Bcl-2 homologous antagonist/killer	NaN	NaN	NaN	NaN	NaN	NaN	NaN	NaN	NaN	NaN	1.52882	NaN	0.623976	NaN	NaN	NaN	NaN	NaN	1.14707	1.45534	NaN	NaN	NaN	NaN	NaN	NaN	NaN	NaN	NaN	NaN	NaN	NaN	NaN	NaN	1.41435	NaN	NaN	NaN	NaN	NaN	NaN	NaN	NaN	0.433175	0.556521	0.230651
TNNT2;HNTN1	E7EPW4;A0A0A0MRJ5;A0A0A0MRJ4;P45379;Q7Z554;A0A024R953;Q15607;Q15608;E7EPN8	Troponin T, cardiac muscle	-1.0281	-0.0867282	-1.72953	-0.294855	-1.43585	-0.579991	-1.11744	-0.686757	-0.571652	-0.860419	-0.55243	-1.06467	0.091979	-0.848213	-1.5607	-0.770442	-0.620537	-0.714143	-0.474698	-1.01937	-0.265994	-0.0454131	-0.997844	-0.993014	-0.53997	-1.27396	-1.38698	-0.721968	-1.05387	-0.39484	-0.563994	-0.555832	-0.0763429	-0.851675	-1.18923	-0.27343	-1.05591	-1.20556	-0.688347	-0.209803	-1.14449	-1.71915	-0.755299	-1.08713	-1.59524	-0.567793
PCMT1	A0A0A0MRJ6;H7BY58;P22061;F6S8N6;B7Z972	Protein-L-isoaspartate O-methyltransferase;Protein-L-isoaspartate(D-aspartate) O-methyltransferase	-1.04693	-0.304169	-1.26788	-0.533234	-0.386797	-0.81226	-1.19796	-0.859425	-0.456167	-0.738093	-0.716624	-0.922044	-0.883832	-1.06787	-0.817464	-1.22854	-0.760307	-0.491399	-1.1723	-0.607959	-0.682012	-0.471182	-0.620564	-0.881588	-0.954703	-1.42511	-0.472442	-1.02374	-0.837959	-0.733074	-0.378275	-0.624042	-0.702229	-0.701377	-0.425512	-0.856465	-0.825897	-0.439652	-0.693765	-0.86596	-0.845513	-1.43204	-0.704503	-0.551314	-0.522126	-0.493759
MTX1	A0A0A0MRK6;Q13505	Metaxin-1	0.685445	1.60169	-0.483777	NaN	-0.236085	-0.0594657	1.07769	0.660176	-0.62882	1.19628	0.343747	0.116567	1.86113	1.23974	0.308841	0.770166	1.49007	1.24094	0.0132992	0.0437279	-0.018998	1.24726	0.508334	0.983063	0.296988	0.918115	1.51891	0.0482878	0.577748	-0.875151	1.36598	NaN	0.167685	NaN	0.00105352	0.00419891	0.981722	0.174379	2.17585	NaN	-1.10232	-0.896388	NaN	NaN	NaN	NaN
ABLIM1	A0A0A0MRL6;F8W8M4;J3QSX6		-0.386235	-0.548989	-0.684785	-1.12421	-0.736723	-0.598247	-0.296586	-0.832664	-0.814745	-0.555381	-0.435724	-0.279911	-1.04299	-0.619093	-0.938329	-1.29153	-0.437762	-1.35997	-0.21881	-0.640595	-0.590874	-0.684946	-0.596424	-0.520846	-1.50076	-0.852302	-2.0392	-0.823581	-1.23268	-1.57907	-1.01464	-1.22477	-0.835469	-0.859933	-0.450503	-0.534409	-0.4485	-0.967889	-0.727505	-0.455561	-0.119249	-0.805855	-0.583587	-0.979649	-0.581819	-1.0213
ANKRD2	B2RBQ4;A0A0A0MRN9;Q9GZV1;Q5T457	Ankyrin repeat domain-containing protein 2	NaN	NaN	NaN	NaN	NaN	NaN	NaN	NaN	NaN	NaN	NaN	NaN	NaN	NaN	NaN	NaN	NaN	NaN	NaN	NaN	NaN	NaN	NaN	NaN	NaN	1.72271	NaN	1.97434	NaN	NaN	NaN	NaN	NaN	NaN	NaN	NaN	NaN	NaN	NaN	NaN	NaN	NaN	1.81686	NaN	NaN	NaN
SMARCA1	Q86UA8;A0A0A0MRP6;B7ZLQ5;P28370;D7EZH4	Probable global transcription activator SNF2L1	-0.228228	-0.335888	-0.988194	-0.630219	-1.34057	-0.883729	-1.72605	-0.795112	0.458924	-0.486966	-0.254605	-1.20648	-0.0140695	-0.00270128	-1.80661	-1.44821	0.963937	-0.712904	-0.678252	-0.345209	NaN	-0.514106	-0.236042	-0.962856	NaN	-1.38744	-1.09016	-1.30696	-1.21234	-2.16401	-0.8404	-0.0549208	-0.600893	-1.13263	-0.328492	-1.07728	-1.01907	-0.0694271	-0.785592	-0.142244	0.579321	-0.405775	0.964905	NaN	NaN	NaN
SNRPC	Q5TAL4;Q53G33;A0A0A0MRR7;P09234	U1 small nuclear ribonucleoprotein C	1.00332	NaN	NaN	NaN	NaN	-0.208143	NaN	NaN	NaN	NaN	-0.267716	NaN	NaN	-0.448267	NaN	NaN	NaN	NaN	NaN	NaN	-0.614868	NaN	0.528053	NaN	NaN	NaN	NaN	NaN	NaN	NaN	-0.206268	NaN	NaN	NaN	NaN	-0.672742	NaN	NaN	NaN	NaN	0.291433	-1.18612	0.430101	NaN	NaN	NaN
ABI1	B6VEX5;B6VEX4;B6VEX3;A0A0A0MRT6;Q8IZP0;Q59G41	Abl interactor 1	NaN	-0.654069	NaN	NaN	NaN	NaN	NaN	NaN	NaN	NaN	NaN	NaN	NaN	NaN	NaN	NaN	NaN	NaN	NaN	NaN	NaN	NaN	NaN	NaN	NaN	NaN	NaN	NaN	NaN	NaN	NaN	NaN	0.0393252	NaN	NaN	NaN	NaN	NaN	NaN	NaN	NaN	NaN	NaN	NaN	NaN	NaN
MPP2	B4DZ84;D3DX48;B4DRL7;A0A0A0MRU0;A0A0D9SFF8;D3DX49;A0A0C4DH75;Q14168;A0A087WVY2;B4DS08;A0A087X0C7;E5RK50;E5RJK0;E5RK44;E5RI32;E5RIU3	MAGUK p55 subfamily member 2	NaN	NaN	NaN	NaN	NaN	NaN	NaN	NaN	NaN	NaN	NaN	0.63122	NaN	NaN	NaN	NaN	NaN	NaN	NaN	NaN	NaN	NaN	NaN	NaN	NaN	NaN	NaN	NaN	NaN	NaN	NaN	NaN	NaN	NaN	NaN	NaN	NaN	NaN	NaN	NaN	NaN	NaN	NaN	NaN	NaN	NaN
NFIB	A0A1B0GW37;U3KQE8;Q5VW28;A0A1B0GWJ4;A0A0A0MRX8;A0A1B0GU97;A0A1B0GWI9;Q5VW27;Q5VW30;Q5VW26;O00712;U3KPY9;A0A1B0GTC1;A0A087WXP2;Q5W0Y9;A0A0S2Z4H3;A0A1B0GVN4;B4DS74	Nuclear factor 1;Nuclear factor 1 B-type	NaN	NaN	NaN	NaN	NaN	NaN	NaN	NaN	NaN	NaN	NaN	NaN	NaN	NaN	NaN	NaN	NaN	NaN	NaN	NaN	NaN	NaN	NaN	NaN	NaN	NaN	NaN	NaN	NaN	NaN	NaN	NaN	-0.398022	NaN	NaN	NaN	NaN	NaN	NaN	NaN	NaN	NaN	NaN	NaN	NaN	NaN
PPP1R12B	A0A0A0MS24;O60237;A0A024R998;A0A024R9B2	Protein phosphatase 1 regulatory subunit 12B;Protein phosphatase 1 regulatory subunit	-0.133903	0.0312614	0.514035	-0.301907	-1.7334	-0.0105881	-0.0513405	-0.347457	0.112028	-0.158106	0.774699	0.131458	-0.238318	-1.02942	-0.353301	-0.885435	-0.453833	-0.293807	0.139645	-0.232056	-0.0731731	0.64731	-0.919454	-0.200287	-0.373417	-0.508107	-0.184136	0.563771	0.135994	-0.155762	-0.264626	0.0421109	0.363544	-0.158465	-1.33612	-1.12941	-0.0759103	0.0343052	-0.0236526	-0.41009	-0.501474	-0.764094	-0.246121	-0.380412	0.162326	0.219628
MFF	A0A0A0MS29;H7C433		NaN	NaN	NaN	NaN	NaN	NaN	NaN	NaN	NaN	NaN	NaN	NaN	NaN	NaN	NaN	NaN	NaN	NaN	NaN	NaN	NaN	NaN	NaN	NaN	NaN	NaN	NaN	NaN	NaN	NaN	NaN	NaN	NaN	NaN	NaN	NaN	NaN	NaN	NaN	NaN	NaN	NaN	NaN	NaN	NaN	NaN
SFXN3	A0A0A0MS41;B4DRS6;Q9BWM7;S4R3N9	Sideroflexin;Sideroflexin-3	-0.294677	-0.052443	1.31014	0.421646	-0.00246582	0.130059	0.647992	-0.0784918	0.205451	-0.968149	0.0725577	1.49262	0.507172	-0.34527	-0.0911631	-1.16667	0.32298	0.120298	-2.11725	0.629977	-0.216362	0.425299	-0.113274	-0.0809277	0.183482	-1.4428	0.404719	-1.86059	-0.234541	-0.773779	-1.3736	-0.647414	-0.55316	-1.64408	-0.294057	-0.577717	-0.700794	-0.898507	-0.290407	-0.922283	-1.68712	-0.507792	-0.49889	-1.06055	-0.965101	-0.159704
GSN	A0A0A0MS51;B7Z9A0;B7Z6N2;A0A0A0MT01;P06396;B7Z4U6;CON__Q3SX14;B3KS49	Gelsolin	NaN	NaN	NaN	NaN	NaN	NaN	NaN	NaN	NaN	NaN	NaN	NaN	NaN	NaN	NaN	NaN	NaN	NaN	NaN	NaN	NaN	NaN	NaN	NaN	NaN	NaN	NaN	NaN	NaN	NaN	NaN	NaN	NaN	NaN	NaN	NaN	NaN	NaN	NaN	NaN	NaN	NaN	NaN	NaN	NaN	NaN
PVR	B3KSS4;A0A0A0MSA9;A8K4I1;A0A0C4DG49;P15151	Poliovirus receptor	NaN	NaN	NaN	2.72413	NaN	NaN	NaN	NaN	1.55038	NaN	1.81294	NaN	0.0907875	NaN	NaN	NaN	1.87986	NaN	NaN	NaN	NaN	NaN	NaN	NaN	NaN	NaN	NaN	NaN	NaN	NaN	NaN	NaN	NaN	NaN	NaN	NaN	NaN	NaN	NaN	NaN	NaN	NaN	NaN	NaN	NaN	NaN
EXOC7;DKFZp686P1551	A0A0A0MSB8;Q9UPT5;Q63HP7;Q5G0E1;A0A0A0MRE1;B4DJ07	Exocyst complex component 7	NaN	0.607639	NaN	NaN	NaN	NaN	NaN	NaN	NaN	0.55186	NaN	NaN	0.183561	0.498933	-0.0342158	NaN	NaN	NaN	0.991714	NaN	NaN	NaN	NaN	NaN	NaN	NaN	0.947307	NaN	NaN	NaN	0.0229472	0.830614	NaN	-0.145221	NaN	NaN	0.394297	-0.390888	0.0527505	NaN	-0.665029	NaN	NaN	NaN	NaN	-0.630312
HADH	A0A140VK76;A0A0A0MSE2;Q16836;E9PF18	Hydroxyacyl-coenzyme A dehydrogenase, mitochondrial	0.683206	0.180201	0.200902	0.630678	0.0915554	0.87693	0.255784	0.40704	0.210407	0.441725	0.655335	-0.0149327	0.657621	0.327278	0.399518	0.49925	0.435959	0.64862	1.20576	0.314284	1.18111	0.154106	0.194341	1.10773	0.612552	2.15573	0.366396	1.34444	0.91515	1.00117	1.42049	0.252005	0.201353	0.129936	0.384143	1.048	0.793876	1.20398	0.43222	1.33147	1.59685	1.08883	0.839729	1.34672	1.31116	0.97323
FHL2;AAG11	Q6I9R8;Q2XQU9;J3KNW4;A0A0A0MSG2;Q14192;Q2TSB7;I0CE67;Q53T40	Four and a half LIM domains protein 2	-0.222015	-0.391863	-0.480487	-0.744426	-1.36159	-0.441562	-0.309735	0.00597424	-0.631515	-0.0103589	-0.569736	-1.11215	-1.37332	-1.28976	-0.659985	-0.937428	-0.0981316	-0.817878	-1.11422	-1.76543	-0.590404	-0.850982	-0.203102	-0.519191	-0.177876	-1.0594	-0.348345	0.207437	-1.37917	0.017412	0.114812	-0.687691	-0.595389	0.809495	-1.30689	-0.582144	-1.40276	-0.890731	-0.765257	-0.811044	-0.0228149	-1.39473	-0.40759	-1.65525	-0.757897	-0.70292
EXOC5	Q8IW24;A0A0A0MSI8;O00471;F8W9B8;B4E0U7;B4DHG4	Exocyst complex component 5	NaN	0.390433	NaN	NaN	NaN	NaN	NaN	NaN	NaN	NaN	NaN	NaN	0.603336	NaN	NaN	NaN	0.361454	NaN	-0.499272	NaN	NaN	NaN	NaN	NaN	NaN	NaN	0.462055	NaN	NaN	NaN	NaN	1.49602	NaN	NaN	NaN	NaN	NaN	NaN	NaN	NaN	NaN	NaN	NaN	NaN	NaN	NaN
PET100	A0A0A0MSK2;P0DJ07	Protein PET100 homolog, mitochondrial	NaN	NaN	NaN	NaN	NaN	NaN	NaN	NaN	NaN	NaN	NaN	NaN	NaN	NaN	NaN	NaN	NaN	NaN	NaN	NaN	NaN	NaN	NaN	NaN	NaN	NaN	NaN	NaN	NaN	NaN	NaN	NaN	NaN	NaN	NaN	0.143213	NaN	NaN	NaN	NaN	NaN	NaN	NaN	NaN	NaN	NaN
TOR1AIP1	A0A0A0MSK5;Q5JTV8;J3KN66;H0YD16	Torsin-1A-interacting protein 1	NaN	0.974064	NaN	NaN	-0.718087	NaN	NaN	-2.67521	1.57257	NaN	-0.315317	NaN	-3.89272	1.7521	-1.51111	NaN	NaN	-0.510759	NaN	-1.16465	-1.01664	NaN	1.61328	1.72867	NaN	NaN	0.102264	NaN	0.310627	NaN	-0.577731	-2.3972	4.1989	NaN	NaN	NaN	0.407364	-0.882995	-2.08302	NaN	NaN	NaN	-2.14542	NaN	0.702679	-1.20939
ARHGAP5	A0A0A0MSK6;Q13017	Rho GTPase-activating protein 5	NaN	NaN	NaN	NaN	NaN	NaN	NaN	NaN	NaN	NaN	NaN	NaN	NaN	NaN	NaN	NaN	NaN	NaN	NaN	NaN	NaN	NaN	NaN	NaN	NaN	NaN	NaN	NaN	NaN	NaN	NaN	NaN	NaN	NaN	NaN	NaN	NaN	NaN	0.803997	NaN	NaN	NaN	NaN	NaN	NaN	NaN
PLS3	B4DPW9;A0A0A0MSQ0;Q53GY0;P13797;Q96HI1;B4DG31;A7E2S2;B4DI60	Plastin-3	0.0410609	0.171888	NaN	NaN	NaN	NaN	NaN	NaN	NaN	NaN	NaN	NaN	-0.511164	NaN	NaN	NaN	NaN	NaN	0.372954	0.0759	NaN	NaN	-1.07224	NaN	NaN	0.140905	NaN	NaN	NaN	NaN	NaN	-0.186594	-0.503552	NaN	-0.232538	NaN	NaN	-0.378068	NaN	NaN	0.403179	0.81722	NaN	NaN	NaN	-0.72561
SLC4A7	A0A0A0MST8;E9PFN4;B5M450;C9JRP1;Q9Y6M7;H7C3C4	Anion exchange protein;Sodium bicarbonate cotransporter 3	NaN	2.03878	NaN	NaN	NaN	NaN	NaN	NaN	NaN	NaN	NaN	NaN	2.08553	NaN	NaN	NaN	NaN	NaN	NaN	NaN	NaN	NaN	NaN	1.83388	NaN	NaN	NaN	NaN	NaN	NaN	NaN	NaN	1.52214	NaN	2.04877	NaN	1.38945	NaN	NaN	NaN	NaN	NaN	NaN	NaN	NaN	NaN
ABCA8	B4E2N9;B4DJ11;B4E2I2;A0A0A0MSU4;A0A024R8L6;O94911	ATP-binding cassette sub-family A member 8	NaN	NaN	NaN	NaN	NaN	NaN	NaN	NaN	NaN	NaN	NaN	NaN	NaN	NaN	NaN	NaN	NaN	NaN	NaN	NaN	NaN	NaN	NaN	NaN	NaN	NaN	NaN	NaN	NaN	NaN	NaN	NaN	NaN	NaN	NaN	NaN	NaN	NaN	NaN	NaN	NaN	NaN	NaN	NaN	NaN	NaN
PITPNB	A0A0A0MSW4;P48739;B3KYB6;B2R7P6;B3KYB7	Phosphatidylinositol transfer protein beta isoform	NaN	NaN	NaN	NaN	NaN	NaN	0.675397	NaN	NaN	NaN	NaN	NaN	NaN	NaN	NaN	NaN	NaN	NaN	NaN	NaN	NaN	NaN	NaN	NaN	NaN	NaN	NaN	NaN	NaN	2.44922	NaN	NaN	NaN	NaN	NaN	NaN	0.406924	NaN	NaN	NaN	NaN	NaN	NaN	NaN	NaN	NaN
NFYC	Q5T6K7;E9PI99;A0A0A0MT00;Q5T6K5;Q13952	Nuclear transcription factor Y subunit gamma	NaN	1.39825	NaN	NaN	NaN	NaN	NaN	NaN	NaN	NaN	NaN	NaN	NaN	NaN	NaN	NaN	NaN	NaN	NaN	NaN	NaN	NaN	NaN	NaN	NaN	0.475535	NaN	NaN	NaN	NaN	NaN	NaN	NaN	NaN	NaN	NaN	0.187609	NaN	NaN	NaN	NaN	NaN	NaN	NaN	NaN	NaN
ATP1A3	M0R116;Q53ES0;B7Z9V4;A0A0A0MT26;P13637;B7Z1Q9;B7Z3F8;B3KV59;B3KSY7	Sodium/potassium-transporting ATPase subunit alpha-3	NaN	-0.123269	NaN	NaN	NaN	NaN	NaN	NaN	NaN	NaN	NaN	NaN	0.236401	NaN	1.31384	1.53717	NaN	0.189598	NaN	0.600534	NaN	NaN	0.760969	NaN	2.34021	2.65299	0.954361	2.41773	NaN	NaN	1.17118	0.55349	NaN	1.27652	NaN	1.69509	NaN	1.43187	0.629858	NaN	NaN	NaN	NaN	NaN	NaN	NaN
SCN5A	A3EY21;Q86V90;K4DIA1;A0A0A0MT39;E9PHB6;S5NU80;E9PG18;H9KVD2;Q14524	Sodium channel protein;Sodium channel protein type 5 subunit alpha	NaN	NaN	NaN	NaN	NaN	NaN	NaN	NaN	NaN	NaN	NaN	NaN	NaN	NaN	NaN	NaN	NaN	NaN	NaN	NaN	NaN	NaN	NaN	NaN	NaN	NaN	NaN	NaN	NaN	NaN	NaN	NaN	NaN	NaN	NaN	NaN	NaN	NaN	NaN	NaN	NaN	NaN	NaN	NaN	NaN	NaN
SMARCA4	A7E2E1;Q9HBD4;B9EGQ8;A0A0A0MT49;P51532;B4E0F1;B4DSI8;B3KNW7;Q59FZ6	Transcription activator BRG1	-0.370004	-0.128265	1.15429	0.889503	-0.427309	0.0445405	1.14931	0.592368	-0.336807	0.0490716	1.45226	0.216695	0.0100918	-0.661433	-1.22745	-1.79146	0.242606	-0.804549	-0.00095585	0.477843	-1.54873	-1.00134	-0.229847	-0.308794	-0.669596	-1.05846	0.249726	0.0854636	0.0630022	-1.07021	0.00127386	-2.57139	0.425943	-0.66486	-0.547691	-1.08462	-0.281409	-1.08059	-0.506378	-1.22622	0.0529831	-0.683843	-1.48364	-0.00288247	NaN	-0.369805
FKBP15	B4DZS8;A0A0A0MT60;Q5T1M5;B4DVS2	Peptidyl-prolyl cis-trans isomerase;FK506-binding protein 15	NaN	NaN	NaN	NaN	NaN	NaN	NaN	NaN	NaN	NaN	NaN	NaN	NaN	NaN	1.65995	NaN	NaN	NaN	2.51556	NaN	NaN	NaN	NaN	NaN	NaN	NaN	NaN	NaN	NaN	NaN	NaN	NaN	NaN	NaN	NaN	NaN	NaN	NaN	NaN	NaN	NaN	NaN	NaN	NaN	NaN	NaN
IVD	A0A0S2Z422;A0A0A0MT83;P26440;A0A0S2Z4K7;H0YLC3;H7C4G6	Isovaleryl-CoA dehydrogenase, mitochondrial	-0.28407	-0.535805	-0.330477	-0.50351	-0.527293	-0.0725597	-0.216491	-0.444144	-0.582867	-0.44415	0.0668283	-0.298918	-1.01949	-0.488369	-0.79864	-0.702074	-0.190497	-0.967902	-0.471247	-0.812503	0.105467	0.371853	-0.735035	-0.605677	-0.68065	-0.43618	-0.453642	-0.477083	-0.407366	-0.570944	-0.599946	-0.452754	-0.483714	-0.254376	-0.224657	-0.274987	-0.0950239	-0.694892	-0.48094	-0.593695	-0.478141	-0.249533	-0.13633	-0.176342	0.0818497	-0.312146
VARS2	A0A140TA45;A0A140TA40;A0A0A0MTG1;A0A140T8Y0;A0A0G2JIA5;A0A140TA36;A0A140TA35;Q5ST30;B7ZL25;B4E0K6;A0A0G2JL52	Valine--tRNA ligase, mitochondrial	NaN	NaN	NaN	NaN	NaN	NaN	NaN	NaN	NaN	NaN	NaN	NaN	NaN	NaN	NaN	NaN	NaN	NaN	NaN	NaN	NaN	NaN	NaN	NaN	NaN	NaN	NaN	NaN	NaN	NaN	NaN	NaN	NaN	NaN	NaN	NaN	NaN	NaN	NaN	NaN	NaN	NaN	NaN	NaN	NaN	NaN
HEL-S-28;ILK	V9HWF0;A0A0A0MTH3;Q13418	Integrin-linked protein kinase	0.516334	0.463785	-0.0132571	0.556029	0.228693	-0.431651	-0.332851	0.286214	0.142572	0.241195	-0.554105	0.63255	0.284901	0.756381	0.338259	0.306535	0.692741	0.416706	0.266895	-0.845184	0.588722	0.0389248	0.138618	-0.244352	-0.0949207	0.225641	0.505107	-0.357779	-0.0827379	0.326639	-0.285239	0.137474	0.116779	0.00011766	0.473658	0.10849	NaN	0.949282	0.214463	-0.13272	0.322408	0.154193	-0.137713	0.557105	0.354986	0.293404
NCEH1	A0A0R4J2G3;A0A0A0MTJ9;Q6PIU2;H7C046	Neutral cholesterol ester hydrolase 1	NaN	NaN	NaN	NaN	NaN	NaN	NaN	NaN	NaN	NaN	NaN	NaN	NaN	NaN	NaN	NaN	NaN	NaN	NaN	NaN	NaN	NaN	NaN	NaN	NaN	NaN	NaN	NaN	NaN	NaN	NaN	NaN	NaN	NaN	NaN	NaN	NaN	NaN	NaN	NaN	NaN	NaN	NaN	NaN	NaN	NaN
CUL2	A0A140VKB1;A0A0A0MTN0;Q13617;Q5T2B5;B7Z1Y1	Cullin-2	NaN	NaN	NaN	NaN	NaN	NaN	NaN	1.29283	NaN	NaN	1.20533	NaN	NaN	NaN	NaN	NaN	NaN	NaN	0.494292	1.0885	NaN	NaN	NaN	NaN	NaN	-0.675961	2.46977	NaN	NaN	NaN	NaN	NaN	NaN	NaN	1.80909	1.36257	NaN	NaN	NaN	-0.707966	-2.47731	NaN	NaN	NaN	NaN	1.5971
HYI	A0A0A0MTR5;F6UJY1;H0YB18;Q5T017;H0YB70;F6UJY9;G4XUV3;J9JIE9;E7EWH8;Q5T013	Hydroxypyruvate isomerase;Putative hydroxypyruvate isomerase	NaN	NaN	NaN	NaN	NaN	NaN	NaN	NaN	NaN	NaN	NaN	NaN	NaN	NaN	NaN	NaN	NaN	NaN	NaN	NaN	NaN	NaN	NaN	NaN	NaN	NaN	-0.495797	NaN	NaN	NaN	NaN	0.762877	NaN	NaN	NaN	NaN	NaN	NaN	NaN	NaN	NaN	NaN	NaN	NaN	NaN	NaN
CD47	A0A0A1TSG4;Q08722	Leukocyte surface antigen CD47	NaN	0.55368	1.88486	0.199139	1.68478	0.385733	NaN	NaN	0.639063	NaN	0.693062	2.02427	NaN	1.2229	NaN	NaN	1.52048	NaN	NaN	0.268537	NaN	NaN	-0.717824	NaN	0.703453	NaN	1.08088	NaN	1.29276	0.596798	-0.0993626	1.94689	1.46733	0.552567	2.41843	NaN	1.31104	0.317446	1.88135	NaN	-1.12876	NaN	NaN	NaN	NaN	1.53663
TMED7-TICAM2;TMED7	A0A0A6YYA0;Q9Y3B3;B4E2C1;Q3B7W7	Transmembrane emp24 domain-containing protein 7	-1.65775	0.850615	-2.6911	-1.65601	1.52187	1.51672	0.440988	-0.606182	-2.35044	1.78644	-0.828397	-0.464239	-0.429383	NaN	NaN	-1.28463	-0.82024	0.0663788	-0.104244	-1.45056	-0.648189	-0.479108	0.787294	-0.549979	0.00907975	-1.21885	0.6539	-0.569563	-2.40223	-0.337426	-1.92433	0.35717	-0.283625	NaN	NaN	-1.2098	0.982164	0.114394	-0.810813	-1.01263	-1.00341	-0.997462	-1.601	NaN	-0.741642	0.204615
C15orf38-AP3S2;ARPIN	A0A0A6YYH1;Q7Z6K5	Arpin	NaN	NaN	NaN	NaN	NaN	NaN	NaN	NaN	NaN	NaN	NaN	NaN	NaN	NaN	NaN	NaN	NaN	NaN	NaN	NaN	NaN	NaN	NaN	NaN	NaN	NaN	NaN	NaN	NaN	NaN	NaN	NaN	NaN	NaN	NaN	NaN	NaN	NaN	NaN	NaN	NaN	NaN	NaN	NaN	NaN	NaN
LUC7L2	A0A0A6YYJ8;B3KRR1		1.17171	0.470686	-0.00201719	0.707461	1.09779	0.164079	0.0989975	-0.16614	0.734514	0.130952	0.165434	-0.356756	-0.327194	1.8783	0.142297	0.833694	0.782085	0.410989	-0.0694417	0.477028	0.819958	1.59223	-0.046981	0.843513	1.9237	-0.473076	-0.498777	0.76884	0.366905	0.751637	0.247403	0.611097	-0.126529	-0.191092	-0.345737	-0.79762	-0.335611	0.324928	0.536922	0.707054	0.318969	0.219668	0.409524	-0.530651	NaN	0.534614
CORO7-PAM16;CORO7;hCG_1787779	A0A0A6YYL4;P57737;B3KUH7;B3KSY4;B4DKU9	Coronin;Coronin-7	2.23916	NaN	NaN	NaN	0.723372	-0.741747	NaN	NaN	-1.21506	NaN	-0.0237591	NaN	0.839544	NaN	NaN	-0.872632	0.252948	0.0223465	NaN	NaN	NaN	0.520231	0.400568	1.11101	-0.131326	-1.08712	0.393746	NaN	NaN	NaN	NaN	0.243472	-0.108759	NaN	NaN	-0.339023	NaN	NaN	-0.0172093	NaN	NaN	NaN	NaN	NaN	NaN	-0.255199
USP13	A0A0A6YZ17;Q92995	Ubiquitin carboxyl-terminal hydrolase;Ubiquitin carboxyl-terminal hydrolase 13	NaN	NaN	NaN	NaN	NaN	NaN	NaN	NaN	NaN	NaN	NaN	NaN	NaN	NaN	NaN	NaN	NaN	NaN	NaN	NaN	NaN	NaN	NaN	NaN	NaN	NaN	NaN	NaN	NaN	NaN	NaN	-0.553361	0.0936943	NaN	0.227489	NaN	NaN	NaN	NaN	NaN	NaN	NaN	NaN	NaN	NaN	NaN
URLC2;NO66	A0A0A8K8C0;Q9H6W3	Bifunctional lysine-specific demethylase and histidyl-hydroxylase NO66	NaN	NaN	NaN	NaN	NaN	NaN	NaN	NaN	NaN	NaN	NaN	NaN	NaN	NaN	NaN	NaN	NaN	NaN	NaN	NaN	NaN	NaN	NaN	NaN	NaN	NaN	NaN	NaN	NaN	NaN	NaN	NaN	NaN	NaN	NaN	NaN	NaN	NaN	NaN	NaN	NaN	NaN	NaN	NaN	NaN	NaN
ACSS3	A0A0B4J1R2;Q9H6R3	Acyl-CoA synthetase short-chain family member 3, mitochondrial	NaN	NaN	NaN	NaN	NaN	NaN	NaN	-0.742437	NaN	NaN	NaN	NaN	-0.737341	NaN	NaN	NaN	NaN	NaN	NaN	NaN	NaN	NaN	NaN	NaN	NaN	NaN	NaN	NaN	NaN	NaN	NaN	NaN	NaN	NaN	NaN	NaN	NaN	NaN	NaN	NaN	NaN	NaN	NaN	NaN	NaN	NaN
NAA15;NARG1	A0A0B4J1W3;B2RBE5;Q9BXJ9;B4E2T6;Q58F05	N-alpha-acetyltransferase 15, NatA auxiliary subunit	-0.355693	2.55529	-0.130728	1.21294	1.24427	-0.72369	NaN	1.40495	NaN	-0.433066	0.303165	-0.177844	1.93121	-1.65352	0.87462	-0.801821	NaN	NaN	-0.0632793	0.200747	NaN	NaN	0.587059	NaN	NaN	0.394013	-0.623118	NaN	0.735355	-0.604071	0.386808	1.369	0.980896	-0.627046	0.103627	-0.686613	NaN	-0.524665	-0.425567	NaN	NaN	NaN	NaN	NaN	-0.850719	NaN
SRSF7	A0A0B4J1Z1;B4DEK2;C9JAB2;Q16629;Q8NB80	Serine/arginine-rich splicing factor 7	0.0333659	-1.051	-0.838587	-2.29879	-1.78425	-2.44714	0.666645	-1.86858	-0.954298	-2.14255	-0.872592	-1.55125	-2.44579	-1.49011	-1.91929	-2.51602	-1.63654	-1.56995	-0.490159	-1.19098	-1.6177	-1.54586	-1.52946	-1.96033	-1.4004	-1.40803	-1.15517	-2.01764	-2.48048	-1.90848	-2.62473	-1.47787	-1.4384	-2.03784	-1.14954	-2.14339	-1.83456	-1.56135	0.338716	-1.85026	-0.796292	-1.33785	-1.84562	-0.851118	-1.53027	-0.544155
LYZ	F8VV32;A0A0B4J259;B2R4C5;P61626	Lysozyme;Lysozyme C	NaN	NaN	NaN	NaN	NaN	NaN	NaN	NaN	NaN	NaN	NaN	NaN	NaN	NaN	NaN	NaN	NaN	NaN	NaN	NaN	NaN	NaN	NaN	NaN	NaN	NaN	NaN	NaN	NaN	NaN	NaN	NaN	NaN	NaN	NaN	NaN	NaN	NaN	NaN	NaN	NaN	NaN	NaN	NaN	NaN	3.23774
COMMD4	A0A0B4J287;H3BM91;Q9H0A8;H3BPG2;H3BQF2	COMM domain-containing protein 4	NaN	NaN	NaN	NaN	NaN	NaN	NaN	NaN	NaN	NaN	NaN	NaN	NaN	NaN	NaN	NaN	NaN	NaN	NaN	NaN	NaN	NaN	NaN	NaN	NaN	NaN	NaN	NaN	NaN	NaN	NaN	NaN	NaN	NaN	NaN	NaN	NaN	NaN	NaN	NaN	NaN	NaN	NaN	NaN	NaN	NaN
TRAPPC2L	A0A0B4J294;H3BUK6;H3BQQ8;H3BP13;Q9UL33	Trafficking protein particle complex subunit 2-like protein	NaN	NaN	NaN	NaN	NaN	NaN	NaN	NaN	NaN	NaN	NaN	NaN	NaN	NaN	NaN	NaN	NaN	NaN	NaN	NaN	NaN	NaN	NaN	NaN	NaN	NaN	NaN	NaN	NaN	NaN	NaN	NaN	NaN	NaN	NaN	NaN	NaN	NaN	NaN	NaN	NaN	NaN	NaN	NaN	NaN	NaN
RPS15	K7EM56;A0A0B4J2B4;S4R417;K7EQJ5;K7ELC2;P62841;S4R456;K7EJ78	40S ribosomal protein S15	2.26521	NaN	-1.0897	NaN	NaN	NaN	NaN	NaN	NaN	NaN	0.134011	NaN	NaN	2.25278	NaN	NaN	NaN	NaN	NaN	0.509882	-0.32402	NaN	1.3216	NaN	NaN	NaN	NaN	0.570057	NaN	NaN	NaN	NaN	NaN	NaN	NaN	0.737831	NaN	NaN	NaN	-1.56628	-0.987792	-0.908198	NaN	NaN	NaN	NaN
TPT1	A0A0P1J1R0;Q5W0H4;A0A0B4J2C3;P13693;J3KPG2;E9PJF7;Q9UP43;B4DKJ4;B4DLD6	Translationally-controlled tumor protein	-2.41603	-1.53003	-0.254221	-3.20124	NaN	-1.97762	-1.77783	0.999714	-0.500659	-1.13807	0.200455	-1.66614	-1.30472	0.664791	-0.0465676	-3.22235	0.036558	0.0171499	-2.75802	-0.0688771	0.296204	-1.38327	0.0824036	-2.56798	-2.40412	-0.182628	-1.05622	-0.708202	0.399353	-3.79004	-1.78132	-2.49672	-0.762879	NaN	-0.682714	-0.558953	-2.10481	NaN	NaN	0.459179	-2.04925	-0.581387	-3.14564	NaN	-3.37196	-3.48916
IGKV1D-13	A0A0B4J2D9		NaN	NaN	NaN	NaN	NaN	NaN	NaN	NaN	NaN	NaN	NaN	NaN	NaN	NaN	NaN	NaN	NaN	NaN	NaN	NaN	NaN	NaN	NaN	NaN	NaN	NaN	NaN	NaN	NaN	NaN	NaN	NaN	NaN	NaN	NaN	NaN	NaN	NaN	NaN	NaN	NaN	NaN	NaN	NaN	NaN	NaN
VKORC1	A0A0B5EEB2;A0A0S2Z5X7;I3L3B4;F8W9H0;A0A0S2Z6I4;E9PLN8;Q9BQB6	Vitamin K epoxide reductase complex subunit 1	NaN	NaN	NaN	NaN	NaN	NaN	NaN	NaN	NaN	NaN	NaN	NaN	NaN	NaN	NaN	NaN	NaN	NaN	NaN	NaN	NaN	NaN	NaN	NaN	NaN	NaN	NaN	NaN	NaN	NaN	NaN	NaN	NaN	NaN	NaN	NaN	NaN	NaN	NaN	NaN	NaN	NaN	NaN	NaN	NaN	NaN
PITX3;PITX1;PITX2	A0A127AXK3;A0A0B5HSU7;A0A0B5HP44;A0A0B5HP26;A0A0B5HLC0;A0A0B5HLA6;A0A0B5HFD9;A0A0B5HFC0;A0A0B5HBG5;A0A0B5HBE9;D6R955;D6RBG8;D6R9U1;H0YJC8;U3KQ81;D6RFI4;X5D9A5;O75364;P78337;Q99697	Pituitary homeobox 3;Pituitary homeobox 1;Pituitary homeobox 2	NaN	NaN	NaN	NaN	NaN	NaN	NaN	NaN	NaN	NaN	NaN	NaN	NaN	NaN	NaN	NaN	NaN	NaN	NaN	NaN	NaN	NaN	NaN	NaN	NaN	NaN	NaN	NaN	NaN	NaN	NaN	NaN	NaN	NaN	NaN	NaN	NaN	NaN	NaN	NaN	NaN	NaN	NaN	NaN	NaN	NaN
CYP51A1	B3KRC6;A0A0C4DFL7;Q16850;Q05D40	Lanosterol 14-alpha demethylase	-0.521453	2.22553	NaN	NaN	NaN	-0.771302	0.876175	-0.815575	NaN	NaN	-0.71343	NaN	NaN	NaN	NaN	-0.86132	0.112272	NaN	NaN	-0.351153	-1.50828	NaN	NaN	-0.82439	-0.421587	-2.10484	NaN	-1.78069	-1.97537	-1.28262	-1.78484	NaN	-0.521252	NaN	-0.488545	NaN	NaN	-0.708628	-0.925772	NaN	-1.10323	NaN	-3.00741	-1.44452	NaN	NaN
MFN1;DKFZp762F247;hfzo1;hfzo2	H7C5H5;Q6AI38;Q4AEJ3;A0A0C4DFN1;Q4AEJ4;Q8IWA4;Q05CV7	Mitofusin-1	NaN	0.574048	NaN	-0.399663	1.15197	NaN	NaN	NaN	-0.772815	0.169647	NaN	NaN	0.704441	NaN	-0.560009	-0.635615	0.468831	0.231007	NaN	-0.857555	NaN	NaN	NaN	NaN	-0.48671	NaN	-0.521051	NaN	NaN	NaN	0.860138	NaN	NaN	NaN	NaN	NaN	NaN	NaN	NaN	NaN	NaN	NaN	NaN	NaN	NaN	NaN
MGLL	B2ZGL7;A0A0C4DFN3;Q99685;C9JAM4;H7C599;H7C4E0;Q2VYF8;E7EWX8	Monoglyceride lipase	NaN	NaN	NaN	NaN	NaN	NaN	NaN	NaN	NaN	NaN	NaN	NaN	NaN	NaN	NaN	NaN	NaN	NaN	NaN	NaN	NaN	NaN	NaN	NaN	NaN	NaN	NaN	NaN	NaN	NaN	NaN	NaN	NaN	NaN	NaN	NaN	NaN	NaN	NaN	NaN	NaN	NaN	NaN	NaN	NaN	NaN
DLG1	A0A0C4DFT3;Q12959;Q59FC4;B4DF78;E7EQD7	Disks large homolog 1	0.131747	0.120552	NaN	NaN	NaN	-0.583038	-0.0839282	-0.760008	-0.503858	-1.13054	NaN	-0.101047	0.0686698	0.228807	-1.04299	NaN	0.378644	0.294153	-1.2986	-1.0767	NaN	NaN	-0.843903	NaN	NaN	-1.69251	NaN	NaN	0.411809	0.0110499	0.818376	-0.0919833	-0.35061	NaN	NaN	0.0691824	NaN	0.492559	-1.14558	NaN	-0.745452	0.827717	-1.35581	1.90013	NaN	NaN
SOD2	Q7Z7M4;A0A0C4DFU2;P04179;Q7Z7M6;Q4ZJI1;Q7Z7M7;F5H3C5;F5H4R2;A0A0C4DFU1;F5GYZ5;Q7Z7M5;G8JLJ2;A0A0C4DG56	Superoxide dismutase;Superoxide dismutase [Mn], mitochondrial	-1.01476	-0.0798742	0.437663	-0.847614	-0.355512	-0.526614	-0.070079	-0.0377509	-0.910402	-0.881093	-0.140494	-0.685808	-0.36317	-0.49553	-0.488701	-0.20651	-0.0657642	0.0393132	0.190211	-0.682922	0.33352	0.0940517	-0.373888	-0.41991	0.233466	0.563641	-0.22694	-0.39283	-0.314177	0.439315	-0.772454	-0.275114	-0.349722	0.0126101	-0.153598	-0.0183038	0.156227	-0.0615048	-0.0320219	-0.00855041	0.280663	0.498839	0.125712	-0.315348	0.723449	-0.0737288
EMILIN1	A0A0C4DFX3;Q9Y6C2	EMILIN-1	1.56947	1.06638	2.83359	1.00691	2.6197	0.898895	1.90696	0.864578	0.829415	1.04936	1.41364	2.5409	1.09861	2.14798	1.16296	0.879751	2.49584	0.285883	3.34247	1.17456	0.452932	3.17774	0.433687	0.687263	0.906094	0.947186	3.2151	0.466054	2.92694	1.06633	1.34612	2.31354	2.55747	1.001	2.65694	0.932747	4.13787	1.49868	1.96034	0.8448	2.61295	4.14242	0.842737	2.19344	2.25339	3.412
NELFA;WHSC2	C9JEM7;H7C2C7;C9JHL4;B3KSP0;B3KTK5;Q53GS8;H0Y3X6;B3KM78;A0A0C4DFX9;Q9H3P2	Negative elongation factor A	NaN	NaN	NaN	NaN	NaN	NaN	NaN	NaN	NaN	NaN	NaN	NaN	NaN	NaN	NaN	NaN	NaN	NaN	NaN	NaN	NaN	NaN	NaN	NaN	NaN	NaN	NaN	NaN	NaN	NaN	NaN	NaN	NaN	NaN	NaN	NaN	NaN	NaN	NaN	NaN	NaN	NaN	NaN	NaN	NaN	NaN
ABI2;ABI-2	E9PEZ7;E7EW77;E7EP65;A0A0C4DG21;F8WAL6;Q9NYB9;Q53RS4;B7Z836	Abl interactor 2	0.77088	NaN	NaN	3.33349	NaN	NaN	NaN	-1.60782	NaN	NaN	-1.39235	NaN	NaN	NaN	NaN	NaN	NaN	NaN	NaN	NaN	NaN	NaN	NaN	NaN	NaN	NaN	0.764763	NaN	NaN	NaN	NaN	NaN	NaN	NaN	NaN	NaN	NaN	NaN	NaN	NaN	-1.24428	NaN	NaN	NaN	NaN	NaN
HEPH	Q1HE23;A0A0C4DG76;Q9BQS7;E7ES21;Q5JZ08;B4DI78;B4DFV3	Hephaestin	NaN	NaN	NaN	NaN	NaN	NaN	NaN	NaN	NaN	NaN	NaN	NaN	NaN	NaN	NaN	NaN	NaN	NaN	NaN	NaN	NaN	NaN	0.496224	NaN	NaN	-1.04914	-0.507008	NaN	NaN	NaN	NaN	NaN	NaN	NaN	NaN	NaN	NaN	NaN	NaN	NaN	NaN	NaN	NaN	NaN	NaN	NaN
DDX46	A8K6X3;A0A0C4DG89;Q7L014;D3DQA6	Probable ATP-dependent RNA helicase DDX46	0.183922	-0.289479	-0.165925	0.397362	0.907388	-0.47672	0.256994	-1.05733	0.553038	0.878944	0.147181	0.0135477	0.220397	-0.155041	-0.750014	-0.0616882	0.0173123	-1.58224	0.060259	0.180895	0.225597	0.778441	0.441263	0.17039	-0.588421	-0.979594	-0.311484	-0.785343	-1.30229	0.154186	-0.508863	-0.158677	0.152468	0.445941	-0.066027	-0.790492	0.284678	0.121439	-0.0388649	-1.09733	-1.03876	-0.514905	-1.17829	0.2983	-1.41109	-0.609655
NME6	C9JQB1;C9J9V6;A0A0C4DG91;O75414;C9J1J2	Nucleoside diphosphate kinase;Nucleoside diphosphate kinase 6	NaN	NaN	NaN	NaN	NaN	NaN	NaN	NaN	NaN	NaN	NaN	NaN	NaN	NaN	NaN	NaN	NaN	NaN	NaN	NaN	NaN	NaN	NaN	NaN	NaN	NaN	NaN	NaN	NaN	NaN	NaN	NaN	NaN	NaN	NaN	NaN	NaN	NaN	NaN	NaN	NaN	NaN	NaN	NaN	NaN	NaN
SCOC	A0A0C4DGB0;Q9UIL1	Short coiled-coil protein	NaN	NaN	NaN	NaN	NaN	NaN	NaN	NaN	NaN	NaN	NaN	NaN	NaN	NaN	NaN	NaN	NaN	NaN	NaN	NaN	NaN	NaN	2.20863	NaN	NaN	NaN	NaN	NaN	NaN	NaN	NaN	NaN	NaN	NaN	NaN	NaN	NaN	NaN	NaN	NaN	NaN	NaN	NaN	NaN	NaN	NaN
PACSIN3	A0A0C4DGG1;B4DUI2;Q9UKS6;D3DQR0;E9PIY1	Protein kinase C and casein kinase substrate in neurons protein 3	-0.140428	0.106577	-0.0243296	-0.484758	-0.808622	-1.18523	-0.266277	-0.220455	-0.984659	-0.542803	-0.288108	-0.012211	0.0216657	-0.225892	-0.582768	-0.909481	-0.310983	-0.712731	-0.29625	-0.262462	-0.627046	-0.862432	-0.519754	-0.147221	-0.487896	-0.374632	0.135696	-1.05123	-0.378454	-0.826943	-0.552766	-0.146252	-0.00262795	-0.34738	-0.680884	-0.263566	-0.504203	-1.22048	-0.596735	-0.493794	0.120545	0.201128	-0.00417774	-0.760525	-1.02336	-0.0808596
CHD4	B3KY63;F5GWX5;A0A0C4DGG9;Q14839	Chromodomain-helicase-DNA-binding protein 4	0.160491	NaN	NaN	0.257752	0.279989	-0.120419	NaN	-0.063543	-0.608052	0.108728	0.70809	-0.234055	-0.33778	-0.832444	-1.92227	-0.64285	-0.576377	-0.919302	NaN	1.09155	-0.264491	-0.754472	-0.621413	1.25988	-0.211032	NaN	0.421901	0.0704886	-1.2979	-0.846874	-0.236913	-0.290251	-0.419287	-1.47893	-0.96798	-1.22641	-1.46668	-1.15774	-0.940772	-1.08829	-1.73513	-0.000519425	-0.647545	-0.837575	-1.2486	-1.26903
CD276	A8K9J6;A0A0C4DGH0;B4DK26;Q5ZPR3;A8K6Q6	CD276 antigen	NaN	NaN	NaN	NaN	NaN	NaN	NaN	NaN	NaN	NaN	NaN	NaN	NaN	NaN	NaN	NaN	NaN	NaN	NaN	NaN	NaN	NaN	NaN	NaN	NaN	NaN	NaN	NaN	NaN	NaN	NaN	NaN	NaN	NaN	NaN	NaN	NaN	NaN	NaN	NaN	NaN	NaN	NaN	NaN	NaN	NaN
CAPNS1	A0A0C4DGQ5;P04632;K7ELJ7;K7EM73;K7EIV0;A0A075B7C0;U3KQE2;K7EKD8	Calpain small subunit 1	-0.264706	1.15621	-0.397939	0.591071	1.35958	-0.0447635	0.423562	-0.090287	-0.194661	0.542419	-0.42164	0.184185	2.27063	0.669235	-0.458195	-0.814935	-1.20274	-0.476637	-0.914451	-0.193614	-0.583721	0.54166	0.276994	-0.0776569	-1.48489	-1.00913	-0.250929	-1.54768	-0.307778	-1.0831	-0.97627	-0.655824	-1.40316	-0.811635	NaN	-1.33628	-1.50554	-2.57256	-0.801953	-0.941142	-0.453316	-0.468301	-0.731538	0.0336084	-0.296076	-0.356031
DHRS7B	A0A0C4DGQ8;Q6IAN0;J3QKT1	Dehydrogenase/reductase SDR family member 7B	NaN	NaN	NaN	NaN	NaN	NaN	NaN	NaN	NaN	NaN	NaN	NaN	NaN	NaN	NaN	NaN	NaN	NaN	NaN	NaN	NaN	NaN	NaN	NaN	NaN	NaN	NaN	NaN	NaN	NaN	NaN	NaN	NaN	NaN	NaN	NaN	NaN	NaN	NaN	NaN	NaN	NaN	NaN	NaN	NaN	NaN
NDUFA6	A0A0C4DGS0;P56556;R4GN43	NADH dehydrogenase [ubiquinone] 1 alpha subcomplex subunit 6	1.43425	0.242884	0.474667	0.777704	-0.591466	1.40108	0.698468	0.670014	0.516364	1.23586	1.37981	-0.336415	-0.037919	0.836966	0.818871	1.69593	0.211436	0.840466	1.05246	0.74139	2.23802	1.69754	1.06649	0.95858	1.96861	2.34543	0.192896	1.67297	1.00133	1.69038	1.20669	-0.25324	0.448735	1.19988	0.880983	2.04838	0.74117	1.74915	0.392282	2.01293	2.16245	1.56765	1.38376	1.38525	1.78855	0.494425
GOLGA2	A0A0C4DGS5;Q08379	Golgin subfamily A member 2	NaN	NaN	NaN	NaN	NaN	NaN	NaN	NaN	NaN	NaN	NaN	NaN	NaN	NaN	NaN	NaN	NaN	NaN	NaN	NaN	NaN	NaN	NaN	NaN	NaN	NaN	NaN	NaN	NaN	NaN	NaN	NaN	NaN	NaN	NaN	NaN	NaN	-0.857026	NaN	-2.0273	NaN	NaN	NaN	-1.57202	NaN	NaN
C5orf51	A0A0C4DGW6;A6NDU8	UPF0600 protein C5orf51	NaN	NaN	NaN	NaN	NaN	NaN	NaN	NaN	NaN	NaN	NaN	NaN	NaN	NaN	NaN	NaN	NaN	NaN	NaN	NaN	NaN	NaN	NaN	NaN	NaN	NaN	NaN	NaN	NaN	NaN	NaN	NaN	NaN	NaN	NaN	NaN	NaN	NaN	NaN	NaN	NaN	NaN	NaN	NaN	NaN	NaN
ATP6AP1;FLJ00383	A0A0C4DGX8;B4DWM8;Q8NF19;B3KR70;Q15904	V-type proton ATPase subunit S1	NaN	NaN	NaN	NaN	NaN	NaN	NaN	NaN	NaN	NaN	NaN	NaN	NaN	NaN	NaN	NaN	NaN	NaN	NaN	NaN	NaN	NaN	NaN	NaN	NaN	NaN	NaN	NaN	NaN	NaN	NaN	NaN	NaN	NaN	NaN	NaN	NaN	NaN	NaN	NaN	NaN	NaN	NaN	NaN	NaN	NaN
IGHV1-3;IGHM	A0A0C4DH29;A2N7P4		NaN	NaN	NaN	NaN	NaN	NaN	NaN	NaN	NaN	NaN	NaN	NaN	NaN	NaN	NaN	NaN	NaN	NaN	NaN	NaN	NaN	NaN	NaN	NaN	NaN	NaN	NaN	NaN	NaN	NaN	NaN	NaN	NaN	NaN	NaN	NaN	NaN	NaN	NaN	NaN	NaN	NaN	NaN	NaN	NaN	NaN
C6orf203	A0A0D9SEI0;Q9P0P8	Uncharacterized protein C6orf203	NaN	NaN	NaN	NaN	NaN	NaN	NaN	0.684063	NaN	NaN	NaN	NaN	NaN	NaN	NaN	NaN	NaN	NaN	NaN	NaN	NaN	NaN	NaN	NaN	NaN	NaN	NaN	NaN	NaN	NaN	NaN	NaN	NaN	NaN	NaN	NaN	NaN	NaN	NaN	NaN	NaN	NaN	NaN	NaN	NaN	NaN
CDK11B;CDK11A;CDC2L1;CDC2L2	B4E3D9;A0A0D9SEI3;Q5QPR3;B7ZVY7;A0A0D9SER5;A0A0D9SEN2;J3QR44;Q9UQ88;P21127;B4E0M9;B4E0N4;A4VCI5;Q5QPR4;J3QR29;Q96CA8;Q6P5Y5;Q4VBY6	Cyclin-dependent kinase 11A;Cyclin-dependent kinase 11B	NaN	NaN	NaN	NaN	NaN	NaN	NaN	NaN	NaN	NaN	NaN	NaN	NaN	NaN	NaN	NaN	NaN	NaN	NaN	NaN	NaN	NaN	NaN	NaN	NaN	NaN	NaN	NaN	NaN	NaN	NaN	NaN	NaN	NaN	NaN	NaN	NaN	NaN	NaN	NaN	NaN	NaN	NaN	NaN	NaN	NaN
SRSF4;SFRS4	A0A0D9SEM4;Q53F45;A8K644;Q08170;Q59EF5;B4DEM8	Serine/arginine-rich splicing factor 4	-0.388746	-1.09661	-1.57226	-1.14277	-1.39243	-0.774149	-0.778629	-1.34579	-1.86268	-1.75076	-0.522184	-0.934269	-1.15102	-0.758629	-1.15882	-1.37953	-0.0880269	-0.680403	-0.401708	-1.29213	-0.326192	-0.248656	0.298442	-0.987084	-1.97266	-1.66466	-0.72442	-0.550113	-1.41343	-1.1319	NaN	-0.726765	-0.734227	-1.06182	-2.13333	-1.09444	0.379357	-0.617357	-0.581669	-1.07087	-1.69882	NaN	-1.54151	-1.34749	-1.90873	-1.05207
NCAM1	A0A0D9SF30		-0.726157	-0.186627	-1.42755	NaN	NaN	NaN	NaN	-0.302697	NaN	NaN	-0.479853	-0.515207	NaN	-0.507712	-1.20408	-1.33805	-0.170951	NaN	-0.594002	-1.15536	-0.636636	0.43082	NaN	-0.324604	NaN	NaN	-0.660746	-0.704164	-1.13001	-2.8194	-1.75065	NaN	0.17145	-0.87342	-0.814017	NaN	-1.38597	NaN	-0.932137	NaN	NaN	-2.82607	NaN	-4.09381	NaN	-1.66566
DDX3X	A0A0D9SFB3;A0A0D9SG12;B5BTY4;Q59GX6;A0A0D9SF53;O00571;Q5S4N1;B4DLU5	ATP-dependent RNA helicase DDX3X	-0.442071	0.227304	-0.335255	0.0578934	-0.15017	-1.10601	0.152018	-1.52011	-0.396625	-0.300171	-1.85146	1.01927	-0.432516	0.317486	0.459289	-1.09634	NaN	-0.545745	-0.422751	-0.621828	-1.14472	0.930023	0.178501	-0.974272	-0.0759259	-1.19839	0.0979375	-1.3487	1.0881	-0.398679	NaN	1.1706	0.58957	-0.11722	0.907119	-1.30066	-0.29162	-0.091626	0.331431	-1.16949	-0.514469	-0.874649	-1.15544	0.0520122	-0.318231	1.289
SPTAN1	A0A0D9SF54		-0.516822	NaN	NaN	-0.949722	NaN	NaN	NaN	-0.368377	-0.121148	NaN	-0.002147	-0.245617	-0.429964	-0.80686	-0.630126	-1.10608	-0.143002	-0.39846	-0.344829	-0.400866	NaN	-0.287827	-0.465357	-1.24002	-0.972399	NaN	NaN	NaN	NaN	-0.735002	NaN	NaN	-0.675136	NaN	NaN	NaN	-0.204767	NaN	NaN	NaN	NaN	NaN	NaN	NaN	NaN	NaN
PKP4	Q4W5T8;A0A0D9SF60;Q99569	Plakophilin-4	NaN	NaN	NaN	NaN	NaN	NaN	NaN	NaN	NaN	NaN	NaN	NaN	NaN	NaN	NaN	NaN	NaN	NaN	NaN	NaN	NaN	NaN	NaN	NaN	NaN	NaN	NaN	NaN	NaN	NaN	NaN	NaN	NaN	NaN	NaN	NaN	NaN	NaN	NaN	NaN	NaN	NaN	NaN	NaN	NaN	NaN
CYTH2	A0A0D9SFG6;Q99418;Q59F87;F8W8E2;Q15795;G5E9B7;M0R2J0	Cytohesin-2	NaN	0.481525	NaN	NaN	1.03074	NaN	NaN	NaN	-0.213503	NaN	NaN	NaN	NaN	NaN	NaN	NaN	NaN	NaN	NaN	NaN	NaN	NaN	NaN	NaN	NaN	NaN	NaN	NaN	NaN	NaN	NaN	NaN	NaN	NaN	NaN	NaN	NaN	NaN	NaN	NaN	NaN	NaN	NaN	NaN	NaN	NaN
KIF1BP;KIAA1279	A0A1B0GV79;A0A1B0GW21;A0A1B0GTE6;A0A0D9SFK7;A0A1B0GUH6;A0A1B0GUA3;Q96EK5	KIF1-binding protein	NaN	NaN	NaN	NaN	NaN	NaN	NaN	NaN	NaN	NaN	NaN	NaN	NaN	NaN	NaN	NaN	NaN	NaN	NaN	NaN	NaN	NaN	NaN	NaN	NaN	NaN	NaN	NaN	NaN	NaN	NaN	NaN	NaN	NaN	NaN	NaN	NaN	NaN	NaN	NaN	NaN	NaN	NaN	NaN	NaN	NaN
PNKP	A0A0D9SFL2;M0QYH2;Q96T60;M0QYI1;M0R3C8	Bifunctional polynucleotide phosphatase/kinase;Polynucleotide 3-phosphatase;Polynucleotide 5-hydroxyl-kinase	NaN	NaN	NaN	NaN	NaN	NaN	NaN	NaN	NaN	NaN	NaN	NaN	NaN	NaN	NaN	NaN	NaN	NaN	NaN	NaN	NaN	NaN	NaN	NaN	NaN	NaN	NaN	NaN	NaN	NaN	NaN	NaN	NaN	NaN	NaN	NaN	NaN	NaN	NaN	NaN	NaN	NaN	NaN	NaN	NaN	NaN
COBLL1	A0A0X1KG75;B7Z2P5;A0A0D9SG04;Q53SF7;B3KMG7	Cordon-bleu protein-like 1	NaN	NaN	NaN	NaN	NaN	NaN	NaN	NaN	NaN	NaN	NaN	NaN	NaN	NaN	NaN	NaN	NaN	NaN	NaN	NaN	NaN	NaN	NaN	NaN	NaN	NaN	NaN	NaN	NaN	NaN	NaN	NaN	NaN	NaN	NaN	NaN	NaN	NaN	NaN	NaN	NaN	NaN	NaN	NaN	NaN	NaN
STXBP1;stxbp1	A0A1B0GWF2;A0A1B0GVQ5;A0A0D9SG72;A0A1B0GTP9;Q68CM6;P61764;B7Z3F4;B7Z1V5;B7Z2V7;Q59GC9	Syntaxin-binding protein 1	-1.55513	-0.880019	NaN	NaN	1.49533	NaN	NaN	NaN	-0.393965	NaN	NaN	NaN	NaN	NaN	NaN	NaN	NaN	NaN	NaN	NaN	NaN	NaN	0.889129	NaN	-1.29531	NaN	NaN	NaN	NaN	NaN	NaN	0.323574	NaN	NaN	NaN	NaN	NaN	NaN	NaN	NaN	NaN	NaN	NaN	NaN	NaN	NaN
UBAP1	A0A0D9SG79;Q9NZ09	Ubiquitin-associated protein 1	NaN	NaN	NaN	NaN	NaN	NaN	NaN	NaN	NaN	NaN	NaN	NaN	NaN	NaN	NaN	NaN	NaN	NaN	NaN	NaN	NaN	NaN	NaN	NaN	NaN	NaN	NaN	NaN	NaN	NaN	NaN	NaN	NaN	NaN	NaN	NaN	NaN	NaN	NaN	NaN	NaN	NaN	NaN	NaN	NaN	NaN
SPTAN1	A0A0D9SGF6;B4DGT1		-1.0877	-1.02269	-1.22971	-1.08532	-1.01151	-1.40575	-1.17084	-1.16259	-1.19235	-1.0136	-0.962061	-1.01461	-0.868564	-1.11387	-1.05179	-1.29771	-0.797976	-1.27381	-1.0287	-0.970005	-0.953822	-0.80373	-0.918002	-0.658442	-0.929416	-1.02895	-0.785198	-1.09846	-0.912591	-1.03308	-1.00312	-0.676937	-0.910046	-0.889106	-0.862933	-0.940245	-0.798649	-0.776546	-0.665655	-1.18026	-1.03687	-1.17087	-1.24305	-1.14089	-1.48011	-1.39503
FXR1	A0A0F7KYT8;A0A0F7L1S3;P51114;A0A0F7L0Q8;B4DXZ6;E9PFF5;B4DM21;B4DM78;E7EU85;B4DGH9	Fragile X mental retardation syndrome-related protein 1	0.137086	-0.366275	-0.588192	0.0032454	-0.541227	-0.651335	-1.08104	-0.346948	-0.454058	-0.532029	0.258459	0.00851998	-0.517823	-0.643514	-0.644766	-0.559128	-0.0679911	0.0496113	0.512162	0.258734	0.189354	0.902703	-0.636437	-0.18895	-0.579523	-0.592441	0.128562	-0.428103	-0.718408	-0.213124	-0.34328	-0.269105	-0.427812	-0.479609	0.286031	-0.886148	0.0164877	0.0195359	-0.207896	-0.488306	-0.620016	-0.579663	-1.02355	0.0144766	-0.898508	-0.696257
HLA-DRA;HLA-DRA1;HLA-DQA1/DRA	Q30118;B4DVL4;A0A0G2JH46;Q59GE3;B0UXD8;A0A0G2JMH6;Q7YPT8;P01903	HLA class II histocompatibility antigen, DR alpha chain	NaN	NaN	NaN	NaN	NaN	NaN	NaN	NaN	NaN	NaN	NaN	NaN	NaN	NaN	NaN	NaN	NaN	NaN	NaN	NaN	NaN	NaN	NaN	NaN	NaN	NaN	NaN	NaN	NaN	NaN	NaN	NaN	NaN	NaN	NaN	NaN	NaN	NaN	NaN	NaN	NaN	NaN	NaN	NaN	NaN	NaN
DIAPH1	A0A140T8Z0;Q6URC4;A0A0G2JH68;O60610;H9KV28;A0RZB8	Protein diaphanous homolog 1	NaN	NaN	NaN	NaN	NaN	NaN	NaN	NaN	NaN	NaN	NaN	NaN	NaN	NaN	NaN	NaN	NaN	NaN	NaN	NaN	NaN	NaN	NaN	NaN	NaN	NaN	NaN	NaN	NaN	NaN	NaN	NaN	NaN	NaN	NaN	NaN	NaN	NaN	NaN	NaN	NaN	NaN	NaN	NaN	NaN	NaN
HEL-S-103;HSPA1B;HSPA1A	A8K5I0;A0A0G2JIW1;P0DMV9;P0DMV8;B4DNT8;B4DWK5;Q59EJ3;B4DFN9;B4DI39;B4E1S9;B4E388;B4DVU9;V9GZ37;B3KTT5;B4DNX1;B4E1T6	Heat shock 70 kDa protein 1B;Heat shock 70 kDa protein 1A	-0.527803	-1.17437	-0.23176	-0.566115	-0.590385	-0.58191	-0.950508	-0.473563	-0.848871	-0.773581	-0.408231	-0.566077	-0.749403	-0.541596	-0.585818	-0.527141	-0.645403	-0.627677	-0.592554	-0.111299	-0.721628	-0.721565	-0.560718	-0.822158	-0.84784	-1.17896	-0.406811	-0.892693	-0.410156	-0.710323	-0.426103	-0.163392	-0.793197	-0.427989	-0.961071	-0.684995	-0.283886	-0.320756	-0.210046	-1.01155	-0.693142	-0.659026	-1.12473	0.2469	-0.75025	0.249785
PSMB9	A2ACR1;A0A0G2JJA7;P28065	Proteasome subunit beta type;Proteasome subunit beta type-9	NaN	NaN	NaN	NaN	NaN	NaN	NaN	NaN	NaN	NaN	NaN	NaN	1.04641	NaN	NaN	NaN	NaN	NaN	NaN	NaN	NaN	NaN	NaN	NaN	NaN	NaN	0.849336	NaN	NaN	NaN	NaN	NaN	-0.319965	NaN	NaN	NaN	NaN	NaN	NaN	NaN	NaN	NaN	NaN	NaN	NaN	NaN
ABHD16A;BAT5	A8K0A4;A0A0G2JJD3;O95870;A0A0G2JI89;B3KNX9	Abhydrolase domain-containing protein 16A	NaN	NaN	NaN	NaN	NaN	NaN	NaN	NaN	NaN	NaN	NaN	NaN	NaN	NaN	NaN	NaN	NaN	NaN	NaN	NaN	NaN	NaN	NaN	NaN	NaN	NaN	NaN	NaN	NaN	NaN	NaN	NaN	NaN	NaN	NaN	NaN	NaN	NaN	NaN	NaN	NaN	NaN	NaN	NaN	NaN	NaN
GABBR1	A0A140TA42;A0A0G2JKF9;Q9UBS5;C9J342;F8WAV2;C9JZG6;F8WDC0;Q59HG8;Q8IW08;Q5SUJ9;Q53EM0;Q8NHA5;A0A140T9S4	Gamma-aminobutyric acid type B receptor subunit 1	NaN	NaN	NaN	NaN	NaN	NaN	NaN	NaN	NaN	NaN	NaN	NaN	NaN	NaN	NaN	NaN	NaN	NaN	NaN	NaN	NaN	NaN	NaN	NaN	NaN	NaN	NaN	NaN	NaN	NaN	NaN	NaN	NaN	NaN	NaN	NaN	NaN	NaN	NaN	NaN	NaN	NaN	NaN	NaN	NaN	NaN
SLC12A7	A0A0G2JNW7;Q9Y666;A0A0U1RR18;A0A0G2JQE3;H0YB78	Solute carrier family 12 member 7	NaN	NaN	NaN	NaN	NaN	NaN	NaN	NaN	NaN	NaN	NaN	NaN	NaN	NaN	NaN	NaN	NaN	NaN	NaN	NaN	NaN	NaN	NaN	NaN	NaN	NaN	NaN	NaN	NaN	NaN	NaN	NaN	NaN	NaN	NaN	NaN	NaN	NaN	NaN	NaN	-1.36524	NaN	NaN	NaN	NaN	NaN
SCRIB	A0A0G2JNZ2;A0A0G2JPP5;Q14160;A0A0G2JMS7	Protein scribble homolog	-0.142846	0.253681	0.750057	-0.115699	-0.183582	-0.226608	1.2009	NaN	0.116614	0.368147	2.02477	-0.43295	0.068786	0.245916	0.558276	0.186016	0.724349	0.00734681	-0.328013	-0.155749	NaN	0.507767	-0.825867	1.64202	0.252862	0.349698	0.317827	0.100144	0.201559	-0.886667	-0.242694	-0.531297	-0.896189	-0.203013	-0.146395	-0.688225	-0.432318	NaN	-0.410667	0.847103	-1.51319	NaN	-0.786345	NaN	-0.726395	-0.664629
C4A	A0A140TA49;A0A140TA32;A0A140TA29;A0A0G2JPR0;P0C0L4	Complement C4-A;Complement C4 beta chain;Complement C4-A alpha chain;C4a anaphylatoxin;C4b-A;C4d-A;Complement C4 gamma chain	2.64729	1.84586	2.18519	1.34523	3.31811	NaN	3.02409	1.85899	2.10675	1.11145	NaN	2.723	2.48757	3.90509	NaN	NaN	3.0979	NaN	0.499116	-1.83697	NaN	3.96133	1.11463	NaN	NaN	1.51986	2.74063	NaN	3.71801	1.99257	-0.93644	2.91057	1.05469	NaN	1.63375	NaN	3.83542	NaN	3.75703	NaN	0.480519	NaN	NaN	2.31324	NaN	2.44617
ABR	B7Z2X0;A0A0G2JQ41;B7Z7Z1;A0A1C7CYZ0;Q12979;Q6ZT60;B7Z683	Active breakpoint cluster region-related protein	2.75001	NaN	-0.353662	NaN	NaN	NaN	NaN	NaN	NaN	3.64902	0.856515	NaN	NaN	NaN	NaN	NaN	NaN	NaN	NaN	NaN	NaN	NaN	NaN	NaN	NaN	NaN	NaN	NaN	NaN	NaN	NaN	NaN	NaN	NaN	NaN	0.543215	NaN	NaN	NaN	NaN	0.822137	NaN	NaN	NaN	NaN	NaN
RBFOX2;DKFZp547L059;RBFOX1;A2BP1;RBFOX3	B0QYV1;A0A0G2JRA5;O43251;S4R469;Q8TCM0;F8VR27;F8VZY7;Q59HD3;X5DP44;B7ZLH9;B0QYY4;A0A087X2B1;F8WSN4;X5D7T5;J3KNW3;X5DNY3;B7Z1U7;F8VZG9;Q9NWB1;I3L1D4;A0A0G2JRD1;S4R3K7;A0A0G2JSB3;B0QYY7;J3QRF4;F8VRS4;A6NFN3	RNA binding protein fox-1 homolog;RNA binding protein fox-1 homolog 2;RNA binding protein fox-1 homolog 1;RNA binding protein fox-1 homolog 3	-1.29825	-0.193333	NaN	NaN	-0.632082	NaN	1.9105	NaN	NaN	NaN	NaN	NaN	-0.0138361	NaN	NaN	-0.966357	NaN	NaN	NaN	-0.314174	NaN	NaN	0.81845	NaN	NaN	NaN	1.35203	NaN	-0.0978804	NaN	-0.379308	0.272088	1.49683	-0.729035	0.510334	-0.193545	-0.556111	NaN	NaN	NaN	0.723444	NaN	NaN	NaN	NaN	-0.0589399
TAF4	V9GY14;A0A0G2JRY5;O00268	Transcription initiation factor TFIID subunit 4	NaN	NaN	NaN	NaN	NaN	NaN	NaN	NaN	NaN	NaN	NaN	NaN	NaN	NaN	NaN	NaN	NaN	NaN	NaN	NaN	NaN	NaN	NaN	NaN	NaN	NaN	NaN	NaN	NaN	NaN	NaN	NaN	NaN	NaN	NaN	NaN	NaN	NaN	NaN	NaN	NaN	NaN	NaN	NaN	NaN	NaN
PUF60	A0A0J9YYL3;A0A0J9YVP6;A0A0J9YXJ8;A0A0J9YXX5;Q9UHX1;A0A0J9YVR6;E9PQ56;A0A0J9YWM1;H0YEM1	Poly(U)-binding-splicing factor PUF60	-0.0780786	-0.104694	-1.74588	0.582788	0.173738	1.17602	1.391	0.165899	0.456167	0.140969	0.728229	0.219703	0.00772452	0.03849	-0.0210265	NaN	-0.0663934	-0.0915508	0.128394	0.957716	1.03953	0.810836	0.0487582	0.512219	-0.0301285	-1.03281	-0.51066	0.595271	-2.07159	-0.864255	0.551691	-1.48728	-0.822166	-0.207768	-1.6688	NaN	0.0431256	NaN	-1.34778	-0.291132	-0.877462	-0.805949	NaN	0.877977	NaN	0.0218306
BNIP3	B4DHJ7;Q53HF4;F6RP06;Q66K24;A0A0J9YW18;Q6NVY4;Q12983	BCL2/adenovirus E1B 19 kDa protein-interacting protein 3	NaN	NaN	NaN	NaN	NaN	NaN	NaN	NaN	NaN	NaN	NaN	NaN	NaN	NaN	NaN	NaN	NaN	NaN	NaN	NaN	NaN	NaN	NaN	NaN	NaN	NaN	NaN	NaN	NaN	NaN	NaN	NaN	NaN	NaN	NaN	NaN	NaN	NaN	NaN	NaN	NaN	NaN	NaN	NaN	NaN	NaN
	A0A0J9YYJ7;A0A0J9YW50;A0A0J9YY01		0.113505	1.57919	0.228605	-0.836005	NaN	NaN	NaN	-0.148869	NaN	0.365816	NaN	0.173157	-0.0382958	NaN	0.39534	NaN	0.386204	NaN	NaN	NaN	0.00313407	-1.02942	NaN	NaN	NaN	NaN	-0.299714	-0.207893	NaN	NaN	0.39798	-0.747173	NaN	NaN	NaN	NaN	NaN	NaN	NaN	NaN	NaN	NaN	NaN	NaN	NaN	-0.128821
ARMC10	A0A0J9YWR7;A0A0J9YXE4;Q8N2F6;H7C2M7	Armadillo repeat-containing protein 10	NaN	0.916753	NaN	NaN	NaN	NaN	NaN	NaN	NaN	NaN	2.03056	NaN	NaN	NaN	NaN	NaN	NaN	NaN	1.35413	0.501872	NaN	NaN	NaN	1.48524	NaN	-0.730488	NaN	NaN	NaN	NaN	0.715438	NaN	NaN	NaN	NaN	NaN	NaN	NaN	NaN	NaN	NaN	1.19103	NaN	NaN	NaN	NaN
DNAJB6	A0A0J9YX62;C9J2C4;A7UJ17;C9JDR7;C9JDX6;F8WCZ4;C9J2P2;B4DNF1		0.398075	-0.0540887	NaN	0.685305	0.0374118	1.18909	1.08449	-0.463622	0.100915	0.0884081	0.644715	0.23806	-0.0300595	0.0297373	0.260282	-0.00733908	0.543762	1.162	-0.0318056	0.79794	-0.139138	0.44218	-0.0646097	0.668546	-0.613925	-0.378036	0.0936109	0.302778	0.203104	-0.359239	-0.638544	0.027357	0.0454554	-0.0538065	0.10268	-0.151741	-0.277509	NaN	0.49543	-0.105897	-0.164915	0.0171803	-0.762136	0.153422	-0.261591	0.0857073
	A0A0J9YXC7		0.10605	-0.0786166	NaN	0.201417	NaN	0.00407139	0.742313	0.129435	-0.113748	-0.342994	0.657464	-0.157432	0.0342267	0.836269	0.141898	-0.360533	-0.00733908	-0.152302	0.935525	0.101087	-0.443186	0.29511	-0.272603	0.108441	-0.256528	0.585566	0.171547	-0.128259	1.16149	-0.400708	0.6486	0.274265	0.176359	0.17349	0.474069	0.0515785	0.124755	0.454035	0.116927	NaN	0.165544	NaN	-0.725742	NaN	NaN	-0.137897
PON2	B4DKM6;A0A0J9YXF2;J3QT77;A0A0J9YYG4;B4DW02;Q15165	Serum paraoxonase/arylesterase 2	-0.20989	-0.383653	-1.13186	1.50819	-0.240684	-0.162081	0.115691	0.261572	-0.0526797	-0.501312	0.0196318	-0.499373	-0.194213	-1.013	-0.0959919	-0.350548	NaN	0.293629	-1.17332	-0.507255	NaN	NaN	0.713673	-1.09444	0.0572417	0.229162	0.404724	-1.34089	-0.904426	NaN	-0.523662	-0.124328	-0.287945	-1.03469	NaN	-0.808014	NaN	NaN	NaN	NaN	-0.943373	NaN	NaN	NaN	NaN	NaN
CELF2	E9PC62;A0A0J9YXJ0;B4DT00;B4DDE7;Q5VZZ6;B2RA86;B4DS31;A0A0J9YX66;A0A1B0GU44;A0A1B0GUN8;O95319;V9GYD9;B4DSZ2	CUGBP Elav-like family member 2	-0.679577	0.155237	NaN	-2.10662	-0.782616	1.1161	-0.22033	-0.0347791	0.411387	1.0041	1.13736	1.11135	-1.37532	-1.0263	-2.18377	-2.32625	NaN	-1.34802	-0.364236	NaN	NaN	NaN	-1.56862	NaN	NaN	-1.17396	-2.3202	NaN	NaN	-1.82171	3.4743	NaN	-0.0770598	-1.00523	-1.63946	-1.51182	NaN	NaN	NaN	-1.10862	-0.981107	-0.957172	NaN	NaN	NaN	-1.25042
PLIN4;KIAA1881	A0A0J9YXN7;Q96Q06;A8E631	Perilipin-4	NaN	NaN	NaN	NaN	NaN	NaN	NaN	NaN	NaN	NaN	NaN	NaN	NaN	NaN	NaN	1.94914	NaN	NaN	NaN	NaN	NaN	NaN	NaN	NaN	NaN	NaN	NaN	NaN	NaN	NaN	NaN	NaN	NaN	NaN	NaN	2.23712	NaN	NaN	NaN	NaN	2.13214	NaN	NaN	NaN	NaN	NaN
CGI-87;TRAPPC12	A0A0J9YXQ9;Q53QD4;B3KST6;Q8WVT3;A0A0G2JQW1;Q8N9N0	Trafficking protein particle complex subunit 12	NaN	NaN	NaN	NaN	NaN	NaN	NaN	NaN	NaN	NaN	NaN	NaN	NaN	NaN	NaN	NaN	NaN	NaN	NaN	NaN	NaN	NaN	NaN	NaN	NaN	NaN	NaN	NaN	NaN	NaN	NaN	NaN	NaN	NaN	NaN	NaN	NaN	NaN	NaN	NaN	NaN	NaN	NaN	NaN	NaN	NaN
CNPY4	A0A0J9YYJ0;Q8N129	Protein canopy homolog 4	NaN	NaN	NaN	NaN	NaN	NaN	NaN	NaN	NaN	NaN	NaN	NaN	NaN	NaN	NaN	NaN	NaN	NaN	NaN	NaN	NaN	NaN	NaN	NaN	NaN	NaN	NaN	NaN	NaN	NaN	NaN	NaN	NaN	NaN	NaN	NaN	NaN	NaN	NaN	NaN	NaN	NaN	NaN	NaN	NaN	NaN
ACO2	A0A0K0K1H7;A2A274;Q99798;B4DZ08;B2RBW5;B4DJW1;B4DW08	Aconitate hydratase, mitochondrial	-0.361891	-0.312178	-0.60691	-0.375222	-0.466285	-0.409108	-0.460394	-0.446779	-0.604241	-0.377657	-0.0458022	-0.399763	-0.279034	-0.388931	-0.363546	-0.292216	-0.213358	-0.379894	-0.192107	-0.32588	0.0462301	-0.589451	-0.421264	-0.18931	0.30795	0.100885	-0.431171	-0.0317353	-0.0979937	0.197958	-0.366395	-0.373164	-0.374266	0.180499	-0.380064	0.107037	-0.365909	-0.146541	-0.179413	-0.201993	0.362651	0.000174252	0.100815	-0.108286	0.150818	0.0783902
CST3	A0A0K0K1J1;P01034	Cystatin-C	NaN	NaN	NaN	NaN	NaN	NaN	NaN	NaN	NaN	NaN	NaN	NaN	NaN	NaN	NaN	NaN	NaN	NaN	NaN	NaN	NaN	NaN	NaN	NaN	NaN	NaN	NaN	NaN	NaN	NaN	NaN	NaN	NaN	NaN	2.20896	NaN	NaN	NaN	NaN	NaN	NaN	NaN	NaN	0.829844	NaN	NaN
SPATA20	A0A0K0K1J9;Q8TB22;A0A0U1RRL8;B3KS41;A8K6Z0;Q9H6R1;B3KWT9	Spermatogenesis-associated protein 20	1.00637	-0.212634	0.918826	-1.08616	-0.207168	-0.597316	-1.50334	1.28754	0.208586	-0.488824	-0.0660591	0.789398	0.179746	-0.218818	0.045275	-0.477677	1.0966	-0.530358	0.101746	0.840973	0.510395	0.249496	0.153442	-0.144648	-0.0209336	0.590114	0.337545	-0.602545	0.30122	-0.935762	-0.105876	-0.418986	-0.104622	-0.586991	-0.225248	-0.781286	-1.1622	-0.8259	0.311589	0.503184	-1.15892	-0.82559	-0.430025	0.0626556	-0.819847	-2.59354
PSMA7;hCG_41772	A0A0K0K1K4;O14818;Q05DH1;H0UI83;H0Y586	Proteasome subunit alpha type-7;Proteasome subunit alpha type	-0.303477	-0.208749	-0.523473	-0.283498	-0.689389	-0.536666	0.290532	-0.51001	-0.256126	-0.196702	-0.790253	-0.246494	-0.587921	-0.501512	-0.463094	-0.289441	-0.786178	-0.0977543	-0.308847	-0.175319	-0.801319	-0.587736	-0.547472	-0.204415	-0.539421	-0.761965	-0.272418	-0.458821	-0.338133	-0.592671	-1.28405	-0.525169	-0.676548	-0.972245	-0.471753	-1.09329	-1.10308	-0.78245	-0.329012	-0.639793	-1.29312	-0.653196	-1.23779	-1.40413	-1.10555	-1.25151
PGLS	A0A0K0K1K7;O95336;M0R261	6-phosphogluconolactonase	-0.42094	-0.472082	-0.739292	-0.185169	-0.298654	0.144575	0.378902	-0.559648	0.211878	0.0405965	-0.380801	0.536201	0.133387	-0.357812	0.496553	-0.184288	0.751221	-0.566542	0.0561656	0.708511	0.142781	0.606599	0.0250833	-0.476329	-0.226593	-0.829831	-0.143309	-0.140151	0.45362	0.00454465	-0.185022	-0.323396	-0.117466	-0.121253	-0.399301	-0.425141	-0.0242444	-0.373481	-0.243195	-0.407558	-1.25147	0.0223944	-0.897507	-0.582229	-0.895923	-0.610798
PSME1	A0A0K0K1L8;Q06323;Q6FHU3	Proteasome activator complex subunit 1	-0.618918	0.113575	-0.942323	-0.429473	-1.1189	-0.740242	-0.216337	-0.999657	-0.140641	-0.447429	-0.837012	-0.9463	-0.798162	-0.727845	-1.12982	-0.832207	-0.610005	-1.12273	-0.254455	-0.856022	-0.759712	-0.653193	-1.2449	-0.503815	-1.06289	-1.43066	-0.973957	-1.01002	-1.01407	-1.30756	-0.986435	-1.00114	-0.892321	-1.29286	-0.949955	-1.34897	-0.922176	-1.16915	-0.656637	-1.61381	-1.77898	-0.765551	-1.32219	-1.46019	-1.16785	-1.37598
	A0A0M3HER2		NaN	NaN	NaN	NaN	NaN	NaN	NaN	NaN	NaN	NaN	NaN	NaN	1.35288	NaN	NaN	NaN	NaN	NaN	NaN	NaN	NaN	NaN	1.45103	NaN	NaN	NaN	NaN	NaN	NaN	NaN	NaN	NaN	NaN	NaN	NaN	NaN	NaN	NaN	NaN	NaN	NaN	NaN	NaN	NaN	NaN	NaN
HLA-DRB1	S0F3J2;S0F2J8;A0A0M3LCZ3;G9HWB7;G1EMY8;D7GN73		NaN	NaN	NaN	NaN	NaN	NaN	NaN	NaN	NaN	NaN	NaN	NaN	NaN	NaN	NaN	NaN	NaN	NaN	NaN	NaN	NaN	NaN	NaN	NaN	NaN	NaN	NaN	NaN	NaN	NaN	NaN	NaN	NaN	NaN	NaN	NaN	NaN	NaN	NaN	NaN	NaN	NaN	NaN	NaN	NaN	NaN
MAP7D2	A0A0M4FLI9;A0A0M4F6E1;Q96T17;B3KXC0;A0A0K1JS24;A0A0K1JRJ6;A0A0M3R6J9	MAP7 domain-containing protein 2	NaN	NaN	NaN	NaN	NaN	NaN	NaN	NaN	NaN	NaN	NaN	NaN	NaN	NaN	NaN	NaN	NaN	NaN	NaN	NaN	NaN	NaN	NaN	NaN	NaN	NaN	NaN	NaN	NaN	NaN	NaN	NaN	NaN	NaN	NaN	NaN	NaN	NaN	NaN	NaN	1.56687	NaN	NaN	NaN	NaN	NaN
PYGM	A0A0M4FEM1;P11217;B4DRW6;B2RB32;B4DRQ4	Glycogen phosphorylase, muscle form;Alpha-1,4 glucan phosphorylase	-0.0609539	0.0983995	-0.319577	0.335558	-0.688986	-0.018969	0.281983	0.235562	0.209326	0.613934	0.217982	0.302233	0.295852	-0.00421315	-0.0888262	-0.323698	0.0736428	-0.0233287	-0.27982	-0.307891	0.355072	0.0793423	-0.106511	-0.0994927	-0.142976	-0.282622	-0.693909	-0.0453116	-0.404529	0.188557	0.150282	0.146498	-0.281109	-0.197341	0.120407	-0.307074	-0.0252104	-0.129456	-0.264773	-0.0964853	0.138578	-0.0964968	0.747927	-0.494233	0.688862	-0.683469
FBF1	I6L969;A0A0R4J2E4;K7ENL6;Q8TES7;Q8IZ48	Fas-binding factor 1	NaN	NaN	NaN	0.0591191	NaN	NaN	NaN	NaN	NaN	NaN	NaN	NaN	NaN	NaN	NaN	NaN	NaN	NaN	NaN	NaN	NaN	NaN	NaN	NaN	-0.268434	NaN	NaN	NaN	NaN	NaN	NaN	NaN	NaN	NaN	NaN	NaN	NaN	NaN	NaN	NaN	NaN	NaN	NaN	NaN	NaN	NaN
MATR3;DKFZp686K23100	A0A0R4J2E8;A8MXP9;P43243;D6REM6;Q68D11;D6R991	Matrin-3	-1.17708	-0.985323	-2.14373	-1.27216	-0.79354	-1.666	-1.2932	-2.05468	-1.48214	-1.55518	-1.52264	-1.49878	-1.12593	-0.964438	-1.47721	-1.54664	-0.80987	-1.36412	-1.14468	-1.58404	-1.38472	-1.28715	-1.24866	-1.20261	-1.44463	-1.67241	-1.12145	-1.81764	-1.54654	-1.55993	-1.57084	-1.05928	-1.13414	-1.28921	-1.2295	-1.63266	-1.09334	-1.36083	-1.15418	-2.03147	-1.95321	-1.51598	-2.24463	-1.36426	-1.51597	-1.38191
AGL	A0A0S2A4E4;P35573;A0A0M4G3H8;G1UI17	Glycogen debranching enzyme;4-alpha-glucanotransferase;Amylo-alpha-1,6-glucosidase	-0.892463	-0.521981	-1.04098	-0.563594	-0.715784	-0.885365	-0.458511	-1.16594	-0.565216	-1.04639	-0.569832	-0.413045	-0.762236	-0.860141	-0.961403	-0.782504	-0.946116	-0.75154	-1.2527	-0.786845	-0.858004	-0.492892	-0.876166	-0.692773	-1.01351	-0.830387	-0.612827	-1.11696	-0.888498	-0.796224	-0.917764	-0.374398	-0.451987	-0.438423	-0.253559	-1.09148	-0.530823	-0.903118	-0.171889	-0.859744	-0.701332	-0.934187	-0.951805	-0.818485	-0.706986	-0.532988
ARID1A;ARID1A variant protein	H0Y488;A0A1B0GTU5;A0A0S2Q0B1;O14497;Q96T01;Q96SM7;Q8NC65;Q96TA9;Q4LE49	AT-rich interactive domain-containing protein 1A	-1.32895	NaN	NaN	NaN	NaN	NaN	NaN	NaN	NaN	NaN	NaN	-0.0409626	NaN	NaN	NaN	NaN	NaN	-0.773659	NaN	NaN	NaN	NaN	NaN	NaN	NaN	NaN	-0.23952	NaN	NaN	NaN	NaN	-1.83732	-0.610889	NaN	NaN	NaN	NaN	NaN	NaN	NaN	NaN	NaN	NaN	NaN	NaN	NaN
ABCB7	A0A0S2Z2Z3;O75027;A0A087WW65;B4DGL8;B3KM98	ATP-binding cassette sub-family B member 7, mitochondrial	1.86007	1.12328	-0.826111	0.893912	0.518972	NaN	NaN	2.21304	-0.97966	NaN	0.527887	0.555312	1.85224	2.18242	2.0272	NaN	3.74505	1.64161	0.734403	0.163963	0.693458	1.5317	1.2432	2.89454	2.56388	0.000433598	1.25219	-0.145612	-0.232982	-0.288872	0.354641	3.04394	-0.123012	1.30211	1.25423	1.13459	-1.426	-0.388245	1.85897	2.08933	-0.252148	NaN	NaN	0.432902	-0.289362	-0.501561
ANXA6	A0A0S2Z2Z6;P08133;A8K3Q7;B7Z582;Q6ZP35;E7EMC6	Annexin A6;Annexin	-0.903547	-0.717918	-0.603313	-0.764584	-0.618044	-0.530586	-0.719618	-0.738369	-0.708796	-0.956317	-0.658619	-0.34982	-0.499908	-0.629068	-0.499989	-0.5837	-0.380952	-0.498824	-0.483299	-0.615262	-0.847587	-0.596243	-0.741049	-0.246347	-0.522599	-0.948949	-0.646326	-0.830393	-0.507237	-0.435499	-0.733191	-0.267307	-0.674672	-0.467408	-0.34587	-0.544084	-0.301074	-0.598577	-0.536121	-0.880668	-0.608456	-0.349422	-1.10126	-0.710226	-0.598614	-0.535704
ACADM;DKFZp686M24262	A0A0S2Z366;Q5T4U5;Q5HYG7;P11310;B7Z9I1;B4DWX6;B4DJE7;B4DVE0	Medium-chain specific acyl-CoA dehydrogenase, mitochondrial	1.3609	1.25151	1.12707	0.886448	-0.0698172	1.16018	1.10492	0.374108	0.954024	0.492104	1.244	0.526203	0.874627	1.0505	1.1695	1.0198	0.511921	1.20562	0.872423	1.00535	1.61859	0.920345	1.33248	1.541	1.84809	1.69413	1.0932	1.33165	1.68166	1.82737	1.17602	1.15177	0.63416	1.24169	1.38918	2.03716	1.10104	1.63449	1.36034	1.90115	1.87731	1.7296	1.68156	1.30469	1.7106	1.60954
ANXA6	A0A0S2Z377;E5RK69	Annexin	NaN	NaN	NaN	NaN	NaN	NaN	NaN	NaN	NaN	NaN	NaN	1.70599	NaN	NaN	0.91414	NaN	NaN	NaN	NaN	NaN	NaN	NaN	NaN	NaN	NaN	NaN	NaN	NaN	1.84549	NaN	0.791683	NaN	NaN	NaN	NaN	NaN	NaN	NaN	NaN	NaN	NaN	NaN	NaN	NaN	NaN	NaN
NKX2-5	A0A0S2Z383;P52952;A1ECB7;A1ECB6;A1ECB2;A1ECB1;A1ECD1;A1ECB8;A0A165EY39	Homeobox protein Nkx-2.5	NaN	NaN	NaN	NaN	NaN	NaN	NaN	0.483864	NaN	NaN	1.12095	NaN	0.668501	NaN	NaN	NaN	NaN	-0.521553	0.0689373	2.10339	NaN	NaN	NaN	-0.0437644	NaN	NaN	NaN	-0.814589	-0.032242	NaN	NaN	-0.952056	0.386412	NaN	NaN	-0.245617	NaN	NaN	-0.426855	NaN	NaN	0.452688	NaN	NaN	NaN	0.401349
APOE	A0A0S2Z3D5;P02649;J9ZVQ3;H0Y7L5;E9PEV4;E7ERP7	Apolipoprotein E	-0.819793	0.57916	-0.238577	0.628877	0.768476	-0.417513	-0.533401	-1.01336	0.0956031	-1.70644	-0.814015	3.53857	0.281896	1.99608	0.752386	-0.921694	3.60786	0.111006	-0.626151	-0.500649	-0.294608	2.86384	-0.0329079	-0.939541	0.122372	-1.24963	-0.180341	-1.0415	4.61216	0.0788973	-0.401788	1.92872	0.577689	-1.13031	3.33513	-1.07243	-0.0790678	-0.622928	-0.516788	-1.61555	-1.65297	-0.961655	-1.21204	3.74161	-1.29175	1.91555
FXN	C9JAX1;A0A0S2Z3G4;Q16595;H7C585	Frataxin, mitochondrial;Frataxin intermediate form;Frataxin(56-210);Frataxin(78-210);Frataxin mature form	NaN	NaN	NaN	NaN	NaN	NaN	NaN	NaN	NaN	NaN	NaN	NaN	1.76195	NaN	NaN	NaN	NaN	NaN	NaN	NaN	NaN	NaN	NaN	NaN	NaN	NaN	0.712551	NaN	NaN	NaN	NaN	NaN	1.12164	NaN	NaN	NaN	NaN	NaN	NaN	NaN	NaN	NaN	NaN	NaN	NaN	NaN
ACTN4	A0A0S2Z3G9;O43707;Q96BG6	Alpha-actinin-4	1.33856	0.119315	0.26638	0.798496	0.193125	0.226037	-0.00331438	-0.692784	0.566567	0.0959322	-0.262472	0.50556	0.564075	-0.947816	2.4079	0.25428	1.10168	0.431914	-0.303234	1.33445	NaN	1.29092	0.230377	-0.553684	-0.329411	-0.603773	0.0810746	-0.116735	0.328127	-0.321697	0.131494	0.29416	-0.157017	0.00212899	0.395548	0.0078873	0.428874	NaN	-0.399716	-0.19203	0.0404395	0.218136	0.516259	1.38447	1.17722	0.502283
CLPTM1	A0A0S2Z3H2;A0A0S2Z3H6;O96005;K7EQQ1	Cleft lip and palate transmembrane protein 1	NaN	NaN	NaN	NaN	NaN	NaN	NaN	NaN	NaN	NaN	NaN	NaN	0.23897	NaN	NaN	NaN	-0.182946	NaN	NaN	NaN	NaN	NaN	NaN	NaN	NaN	0.594705	NaN	NaN	NaN	NaN	NaN	NaN	NaN	NaN	NaN	NaN	NaN	NaN	NaN	NaN	NaN	NaN	NaN	NaN	NaN	0.0107883
SLC25A4	A0A0S2Z3H3;P12235;V9GYG0;A0A0S2Z359;A0A0S2Z3C4	ADP/ATP translocase 1	-0.760637	-1.15122	-0.692061	-2.22192	-1.21083	-0.936386	-1.03782	-0.60878	-0.995245	-1.07859	-0.69806	-0.135232	-1.62852	-0.506815	-1.43769	-1.62603	-1.91561	-0.765776	-0.725423	-1.01469	-0.290806	-1.96787	-0.255745	-0.559915	-0.985286	-0.75151	-0.511552	-1.23973	-0.810725	-0.799845	-0.772581	-1.15247	-0.703482	-0.973663	-1.12446	-0.754477	-0.648742	-1.06165	-1.07785	-0.37973	-0.711744	-0.68307	-0.845367	-0.416691	0.0351006	-1.41078
GNAS;GSA	A0A0S2Z3H8;P63092;Q5JWF2;B0AZR9;A0A0S2Z3S5;Q14455;Q5FWY2;S4R3E3	Guanine nucleotide-binding protein G(s) subunit alpha isoforms short;Guanine nucleotide-binding protein G(s) subunit alpha isoforms XLas	0.74023	0.328171	0.907528	0.180099	-0.00733908	0.0941367	0.867512	0.305935	0.551051	0.473946	0.224984	-0.516318	0.136771	0.762546	0.441698	0.231825	0.991743	0.0614559	-0.349825	-0.53653	-0.282394	-0.386917	-0.0565241	0.989068	0.357272	-0.204789	0.554497	-0.113784	-0.110148	-0.309878	0.998698	-0.104239	-0.0203793	1.89518	-0.374172	-0.0597697	1.32591	0.762197	0.340451	-0.703661	-0.404158	0.338361	-0.211558	-0.254833	0.503019	0.671667
RCC1	Q5T081;A0A0S2Z3I4;A0A0S2Z404;P18754;C9JW69;C9JRH2;C9JMJ4;C9J3R0;C9JQZ4	Regulator of chromosome condensation	NaN	1.01736	NaN	NaN	NaN	0.04792	NaN	NaN	NaN	NaN	NaN	0.212952	2.6621	NaN	NaN	NaN	NaN	NaN	NaN	NaN	NaN	NaN	NaN	NaN	NaN	NaN	NaN	NaN	NaN	-0.245374	NaN	NaN	NaN	-0.154842	NaN	NaN	NaN	NaN	NaN	NaN	NaN	NaN	NaN	NaN	NaN	NaN
BAG1	A0A0S2Z3K4;J3QTA2;Q99933	BAG family molecular chaperone regulator 1	NaN	NaN	NaN	NaN	NaN	NaN	NaN	NaN	NaN	NaN	NaN	NaN	NaN	NaN	NaN	NaN	NaN	NaN	NaN	NaN	NaN	NaN	NaN	NaN	NaN	NaN	NaN	NaN	NaN	NaN	NaN	NaN	NaN	NaN	NaN	NaN	NaN	NaN	NaN	NaN	NaN	NaN	NaN	NaN	NaN	NaN
ETFA	A0A0S2Z3L0;P13804;A0A0S2Z3M4;H0YLU7;H0YKF0;H0YL12;H0YK49;H0YNX6	Electron transfer flavoprotein subunit alpha, mitochondrial	0.158047	0.272142	0.437322	-0.215829	-0.109586	0.0325813	0.408167	0.074233	-0.0307751	-0.0744494	0.0294911	-0.330632	-0.0693028	-0.0612769	-0.191023	-0.0816066	-0.250278	0.214075	0.130859	-0.238772	0.180884	-0.355386	0.559741	0.296247	0.5451	0.742816	0.0316546	0.811557	0.883092	0.87329	0.431681	0.580645	0.150973	0.599423	0.35952	0.651754	0.396223	0.819309	0.57673	0.601187	0.547046	0.535997	0.425343	0.48469	0.751804	0.451015
ATP2A2	A0A0S2Z3L2;P16615;H7C5W9	Sarcoplasmic/endoplasmic reticulum calcium ATPase 2	-0.832413	-0.617057	-0.606389	-0.851117	-0.655548	-0.831284	-0.401987	-0.540455	-0.754244	-0.503328	-1.012	-0.0343514	-0.882241	-0.153026	-0.578088	-0.776191	-0.306328	-0.589869	-0.865461	-0.702873	-0.931836	-0.253875	-0.651191	-0.732935	-0.455055	-0.354444	-0.158002	-0.87555	-0.235442	-0.610385	-0.613908	0.166105	-0.315889	-0.737909	0.191764	-1.10601	0.0690224	-0.80071	-0.243882	-1.25958	-0.760579	-0.302444	-0.811137	0.0513078	-0.720471	-0.0354056
ACADSB	A0A0S2Z3P9;P45954	Short/branched chain specific acyl-CoA dehydrogenase, mitochondrial	-0.331714	-0.155746	-0.0299967	-0.781195	0.0300705	-0.43154	-1.22225	-0.479836	-1.06631	-0.260434	-0.0506663	-0.603019	-0.0847312	-0.570155	-0.687773	-0.878259	-0.235693	-0.30271	-0.474954	-0.600921	-0.426116	-0.280539	-0.632475	-0.872444	-0.817927	-0.657379	-0.689137	-0.704632	-0.32527	-0.433818	-0.869982	-0.107695	-0.26234	-0.866588	0.0811863	-0.909613	-0.427343	-1.09093	0.0651939	-0.749635	-0.538094	-0.130345	-0.589725	-0.534536	-0.493135	-0.784002
CRK	L7RT18;A0A0S2Z3Q4;P46108;A0A0S2Z3K9;I3L297	Adapter molecule crk	NaN	NaN	NaN	NaN	NaN	NaN	NaN	NaN	0.0991699	NaN	NaN	NaN	NaN	NaN	NaN	NaN	NaN	NaN	NaN	NaN	NaN	NaN	NaN	NaN	NaN	NaN	NaN	NaN	NaN	NaN	NaN	NaN	NaN	NaN	NaN	NaN	NaN	NaN	NaN	NaN	NaN	NaN	NaN	NaN	NaN	NaN
EFEMP1	A0A0U1RQV3;B4DWH0;A0A0S2Z3V1;Q59G97;B2R6M6;A8KAJ3;A0A0S2Z4F1;Q12805;Q53TA7;B3KS53	EGF-containing fibulin-like extracellular matrix protein 1	NaN	NaN	NaN	NaN	NaN	NaN	5.55178	NaN	NaN	NaN	NaN	NaN	NaN	NaN	NaN	NaN	NaN	NaN	4.40847	NaN	NaN	NaN	NaN	NaN	NaN	NaN	NaN	NaN	2.99723	NaN	NaN	NaN	NaN	NaN	NaN	NaN	NaN	NaN	NaN	NaN	NaN	3.17124	NaN	NaN	3.25525	3.77493
ATP1A2	B3KRI1;B1AKY9;B2RAQ4;A0A0S2Z3W6;P50993;B3KX35;H0Y7C1;B4DIQ8	Sodium/potassium-transporting ATPase subunit alpha-2	1.45737	1.12763	0.569422	0.846874	1.59323	0.987504	0.905601	0.573884	2.11168	1.22504	1.22598	0.859294	0.954991	0.745564	1.04042	1.29008	1.27044	0.975012	0.762617	1.26207	1.38097	0.731925	1.40889	1.34273	1.29647	1.58546	1.53182	0.970891	0.824451	0.84534	1.12647	-0.0397856	0.450232	0.759608	1.68016	1.20757	1.27145	1.61245	1.10197	0.900053	1.06601	0.262143	1.84763	1.48288	1.02477	0.178851
ITPA	A0A0S2Z3W7;Q9BY32;A0A0S2Z423	Inosine triphosphate pyrophosphatase	NaN	NaN	NaN	NaN	NaN	NaN	NaN	NaN	NaN	NaN	NaN	NaN	0.141542	NaN	NaN	NaN	NaN	NaN	NaN	NaN	NaN	NaN	0.906467	NaN	NaN	-1.52847	NaN	NaN	NaN	NaN	NaN	NaN	NaN	NaN	NaN	-1.16343	NaN	NaN	NaN	NaN	NaN	NaN	NaN	NaN	NaN	NaN
GDI1	A0A0S2Z3X8;P31150;B4DHX4;B4DH24	Rab GDP dissociation inhibitor alpha	0.843574	0.301048	-0.000697879	0.166686	-0.0626525	0.695576	-0.34301	1.20354	0.572038	1.23231	0.950015	0.848091	0.531508	1.09045	0.171187	-0.39214	0.659573	-0.145091	0.392031	0.773256	0.617231	0.578865	-0.257651	-0.269275	-0.629071	-0.0425098	0.109321	-0.234265	0.121335	0.00667407	-0.229308	-0.0463027	-0.163431	-0.292928	0.527439	-0.318808	0.506306	0.693854	-0.027775	0.163228	0.0799811	0.513728	2.94186	-0.0546419	1.1131	-0.1286
LGALS3BP	B4DVE1;A0A0S2Z3Y1;Q08380;B3KP88;B4DDG4;B4DWA8;B4DI70;K7EP36	Galectin-3-binding protein	1.6267	2.51223	0.409143	0.599029	0.713766	3.40271	0.374861	4.28607	2.98779	2.35146	2.00923	0.637955	1.2312	0.759801	1.16659	0.81356	0.317687	0.0868314	3.20616	2.40568	1.38253	0.426385	1.46196	1.12596	2.50846	2.44767	0.942762	0.659554	0.244833	2.68823	3.43025	0.425796	1.72593	3.8112	1.25172	1.8393	0.296076	3.02172	0.882987	2.6688	3.07285	1.73732	2.85042	0.616326	1.90607	1.25773
AGFG1;HRB	A0A0S2Z444;A0A0S2Z3Y3;A0A0S2Z3Z1;A0A0S2Z462;P52594;B4DHC5;A0A024R458;B8ZZY2;C9J2I0	Arf-GAP domain and FG repeat-containing protein 1	NaN	NaN	NaN	NaN	NaN	NaN	NaN	NaN	NaN	NaN	NaN	NaN	NaN	NaN	NaN	NaN	NaN	NaN	NaN	NaN	NaN	NaN	NaN	NaN	NaN	NaN	NaN	NaN	NaN	NaN	NaN	NaN	NaN	NaN	NaN	NaN	NaN	NaN	NaN	NaN	NaN	NaN	NaN	NaN	NaN	NaN
GALT	B2RAT6;A0A0S2Z3Y7;P07902;G3V3U5;G3V223;F2Z2X9;B4DDJ1;B3KTV7;Q8N8Y3;A0A0S2Z4I0;G3V4G9	Galactose-1-phosphate uridylyltransferase	NaN	NaN	NaN	NaN	NaN	NaN	NaN	NaN	NaN	NaN	NaN	NaN	NaN	NaN	NaN	NaN	NaN	NaN	NaN	NaN	NaN	NaN	NaN	NaN	NaN	NaN	NaN	NaN	NaN	NaN	NaN	NaN	NaN	NaN	NaN	NaN	NaN	NaN	NaN	NaN	NaN	NaN	NaN	NaN	NaN	NaN
MPV17	G5E9F5;A0A0S2Z469;B5MC53;B5MCF8;A0A0S2Z3Z9;P39210;A0A0S2Z466;F8WEL3;B5MC10;A8MTD3;E7EX18	Protein Mpv17	NaN	NaN	NaN	NaN	NaN	NaN	NaN	NaN	NaN	NaN	NaN	NaN	NaN	NaN	NaN	NaN	NaN	NaN	NaN	NaN	NaN	NaN	NaN	NaN	NaN	NaN	NaN	NaN	NaN	NaN	NaN	NaN	NaN	NaN	NaN	NaN	NaN	NaN	NaN	NaN	NaN	NaN	NaN	NaN	NaN	NaN
HSD17B10	A0A0S2Z410;Q99714;Q5H928;A0A0S2Z434	3-hydroxyacyl-CoA dehydrogenase type-2	-0.407824	0.255249	0.061324	-0.10596	0.0162472	-0.417046	0.320048	-0.572815	-0.391072	-0.429658	-0.125599	0.0623945	0.00238043	-0.340635	-0.402759	-0.813726	-0.438006	0.15824	0.139376	0.141965	0.0216531	-0.475708	-0.0694623	-0.432824	-0.705745	0.280748	0.578398	-0.00608908	0.0131023	0.0600831	-0.217508	0.139917	0.199981	-0.129963	0.543017	-0.794121	-0.0210165	-0.787356	0.170035	-0.784505	-0.102627	-0.561404	0.153566	0.329391	0.106192	1.02483
[truncated: 3,236 more rows]
