# Supplementary material for: Proteomic mapping of atrial and ventricular heart tissue in patients with aortic valve stenosis
Source: Sci Rep. 2021 Dec 22;11:24389. doi: 10.1038/s41598-021-03907-3 (PMC8695579; doi:10.1038/s41598-021-03907-3)
Supplement: Supplementary file 5 — Supplementary Table 2. [file 41598_2021_3907_MOESM5_ESM.xlsx]

## Sheet: Legend
Supplementary Table 2 - Univariate data analysis of differential protein expression between atria and ventricles

## Sheet: Differential Protein Expression
ProteinName	ProtID	Gene name	logFC (Ventricle / Atrium)	adj.P.Val
Myosin light chain 3	A0A024R2Q5;P08590	MYL3	-8.85947	7.04362e-20
NA	B0ZBE8	NPPA	10.9067	1.98794e-19
NA	H7BZE4	MYL7	4.11943	1.04233e-18
Myosin regulatory light chain 2, ventricular/cardiac muscle isoform	Q6IB42;P10916;Q14908;Q7Z3Z1;G3V1V8	MYL2	-4.27986	1.0938e-17
Filamin-C	Q14315	FLNC	-2.16832	7.70839e-15
Fibulin-2	Q86V58;B7Z9B8;P98095;B7Z6T9;Q9Y3V7	FBLN2;DKFZp586A1519	7.20223	2.67417e-14
Natriuretic peptides A;Atrial natriuretic factor	A0A087X094;P01160	NPPA	7.78263	1.04545e-11
Dihydropyrimidinase-related protein 2	Q59GB4;A0A1C7CYX9;Q16555	DPYSL2	2.05505	2.06503e-11
Peroxiredoxin-1	Q06830;B2R4P2	PRDX1	1.4613	4.02553e-10
Clusterin;Clusterin beta chain;Clusterin alpha chain;Clusterin	P10909;H0YLK8;E7ERK6;E7ETB4;H0YC35	CLU	3.16948	5.36926e-10
Heat shock protein beta-6	V9HWB6;O14558;B4DNC2;K7EP04	HEL55;HSPB6	-3.29609	5.57802e-10
NA	H7BXR3;H7C1R7	SORBS2	-2.2806	7.59814e-10
EMILIN-1	A0A0C4DFX3;Q9Y6C2	EMILIN1	3.25329	9.57108e-09
Peptidyl-glycine alpha-amidating monooxygenase;Peptidylglycine alpha-hydroxylating monooxygenase;Peptidyl-alpha-hydroxyglycine alpha-amidating lyase	P19021;B4DKE0;H7BYD9	PAM	2.92887	1.29975e-07
Sarcoplasmic/endoplasmic reticulum calcium ATPase 2	A0A0S2Z3L2;P16615;H7C5W9	ATP2A2	1.12638	2.52376e-07
Fibrinogen alpha chain;Fibrinopeptide A;Fibrinogen alpha chain	P02671;A0A0S2Z3E8	FGA	5.40086	3.60367e-07
Myosin-6	P13533	MYH6	2.69591	5.00147e-07
Heat shock protein beta-7	Q9UBY9;D3YTC6;Q68DG0;Q7Z3C1;Q8N241;B3KQL3	HSPB7;DKFZp779D0968;DKFZp686A14192	-1.60254	5.13587e-07
Complement C4-A;Complement C4 beta chain;Complement C4-A alpha chain;C4a anaphylatoxin;C4b-A;C4d-A;Complement C4 gamma chain	A0A140TA49;A0A140TA32;A0A140TA29;A0A0G2JPR0;P0C0L4	C4A	4.30695	9.21051e-07
Long-chain-fatty-acid--CoA ligase 1	A8K9T3;P33121;E7EPM6;B4E0R0;B7Z3Z9	ACSL1	-1.57711	1.60641e-06
Fatty acid-binding protein, heart	S4R371;P05413;Q6IBD7;S4R3A2	FABP3	-1.46822	2.14492e-06
Hexokinase	B3KXY9	NA	0.822479	2.28348e-06
Leukocyte surface antigen CD47	A0A0A1TSG4;Q08722	CD47	2.30736	2.28348e-06
Isocitrate dehydrogenase [NADP], mitochondrial;Isocitrate dehydrogenase [NADP]	Q53GL5;P48735;Q13584;B4DSZ6	IDH2	-0.927025	2.65858e-06
Sorbin and SH3 domain-containing protein 2	O94875;B7Z997	SORBS2	-1.81137	5.42422e-06
NAD-dependent malic enzyme, mitochondrial	P23368	ME2	1.72423	5.42422e-06
Vimentin	V9HWE1;P08670;B0YJC4;Q53HU8;B3KRK8	HEL113;VIM	1.91268	5.74031e-06
Sorbin and SH3 domain-containing protein 1	Q9BX66;B4DTX5;B4E264;A0A0U1RQI5	SORBS1	-1.40387	8.93852e-06
NA	Q6MZV7;Q6PYX1	DKFZp686C11235	2.14764	1.43948e-05
Myosin-7	P12883;Q59EV3;Q5GJ54	MYH7	-1.1785	1.68428e-05
Beta-enolase;Enolase	P13929;E5RGZ4	ENO3	-1.16628	2.01465e-05
Sushi repeat-containing protein SRPX	P78539;V9HW11	SRPX;HEL-S-83p	2.35805	2.13471e-05
Peroxiredoxin-6	V9HWC7;P30041	HEL-S-128m;PRDX6	0.918589	2.56735e-05
Four and a half LIM domains protein 1	Q53FI7;B7Z6U8;B7Z5V0;B7Z9A1;B7Z4B7;Q5JXI8;B7Z5T3;Q13642;Q5JXH8;Q5JXH7;Q5JXI3;A0A0D9SFZ9;Q5JXI2;A0A0D9SFI6;A0A0D9SFB0;Q5JXH9;B3KRI9	FHL1	-1.96197	3.34545e-05
Collagen alpha-2(I) chain	A0A087WTA8;A0A0S2Z3H5;P08123	COL1A2	2.7394	3.34545e-05
L-xylulose reductase	J3KS22;Q7Z4W1;J3QS36;J3KRZ4;J3QS45;J3KSZ5	DCXR	-1.22327	3.44345e-05
Apolipoprotein E	A0A0S2Z3D5;P02649;J9ZVQ3;H0Y7L5;E9PEV4;E7ERP7	APOE	4.17089	4.27397e-05
Tubulin alpha-4A chain	P68366	TUBA4A	-2.21247	4.30724e-05
Myosin-binding protein C, cardiac-type	B6D425;A8MXZ9;Q14896;A0A0A0MQU5;F5GZR4;B4DNB5	MYBPC3	-1.14902	4.30724e-05
Cathepsin B;Cathepsin B light chain;Cathepsin B heavy chain	B4DL49;A0A024R374;P07858;A8K2H4;B4DMY4;B3KUJ8;Q6LAF9	CTSB	1.06087	4.30724e-05
Collagen alpha-1(XIV) chain	Q05707;A8KAL5;J3QT83	COL14A1	2.33985	4.30724e-05
Transmembrane emp24 domain-containing protein 10	A0A024R6I3;Q53GF9;P49755;B4DZH3	TMED10	1.04089	5.10277e-05
Secernin-1	A0A090N7T9;Q12765;A0A024RA21;B4DH22;C9K052	SCRN1	1.16812	7.93063e-05
Myosin light chain 4	A0A1C7CYY4;P12829;I3L1K6;I3L532;I3L3U1	MYL4	2.96693	8.91351e-05
Basement membrane-specific heparan sulfate proteoglycan core protein;Endorepellin;LG3 peptide	A0A024RAB6;P98160	HSPG2	0.944469	0.000119595
Vitronectin;Vitronectin V65 subunit;Vitronectin V10 subunit;Somatomedin-B	D9ZGG2;P04004	VTN	4.35377	0.000121055
Titin	Q8WZ42	TTN	-0.812001	0.000135997
Microfibrillar-associated protein 2	A0A024RA94;P55001	MFAP2	1.67959	0.000144334
Galectin-3-binding protein	B4DVE1;A0A0S2Z3Y1;Q08380;B3KP88;B4DDG4;B4DWA8;B4DI70;K7EP36	LGALS3BP	-2.77095	0.000154766
ATP-dependent RNA helicase DDX3X	A0A0D9SFB3;A0A0D9SG12;B5BTY4;Q59GX6;A0A0D9SF53;O00571;Q5S4N1;B4DLU5	DDX3X	1.92194	0.000162838
Phosphoglucomutase-1	P36871;B4DFP1	PGM1	-0.635186	0.000166423
Alcohol dehydrogenase [NADP(+)]	V9HWI0;P14550	HEL-S-165mP;AKR1A1	1.24851	0.000173649
Laminin subunit alpha-2	P24043;A0A087WX80;A0A087WYF1;Q59H37	LAMA2	-1.08886	0.000212094
Dihydropyrimidinase-related protein 3	A0A140VK07;Q6DEN2;Q14195;Q8IXW6	DPYSL3	1.1451	0.000212094
Aldehyde dehydrogenase, mitochondrial	P05091;Q53FB6;B4YAH7	ALDH2	0.927537	0.000231815
Pyruvate kinase	A0A024R5Z9;H3BTN5;B4DRT3;Q504U3;H3BR70;A0A024R609;H3BQ34	PKM2;PKM	0.640822	0.000249659
Elongation factor 1-delta	E9PK01;P29692;A0A087X1X7;Q71RH4;Q9H7G6;D3DWK1;B2RAR6;E9PRY8;E9PPR1;E9PL12;E9PQ49;E9PI39;E9PMW7;E9PIZ1;H0YCK7;E9PQZ1	EEF1D	1.10742	0.000314609
Annexin;Annexin A2;Putative annexin A2-like protein	V9HW65;A0A024R5Z7;P07355;H0YN42;H0YMD0;H0YMU9;A6NMY6;H0YM50;H0YKS4;B3KRQ1;H0YN28;H0YL33;H0YNP5;B4DNH8	HEL-S-270;ANXA2;ANXA2P2	1.51407	0.000334253
Troponin C, slow skeletal and cardiac muscles	Q6FH91;P63316	TNNC1	-1.50313	0.00038013
Histone H1.0;Histone H1.0, N-terminally processed	P07305	H1F0	0.751795	0.000575516
Fibronectin;Anastellin;Ugl-Y1;Ugl-Y2;Ugl-Y3	A0A024R462;B7ZLE5;P02751;Q6MZM7;Q6N084;Q68CX6	FN1;DKFZp686O12165;DKFZp686L11144;DKFZp686O13149	1.21962	0.000604186
Endoplasmin	Q5CAQ5;V9HWP2;P14625;B4DHT9;B4DU71;Q59FC6	TRA1;HEL-S-125m;HSP90B1	0.673358	0.000820295
T-complex protein 1 subunit alpha	P17987;E7ERF2;E7EQR6;F5H282	TCP1	0.803896	0.000820295
SH3 domain-binding glutamic acid-rich-like protein	V9HW48;O75368;D3DTE6	HEL-S-115;SH3BGRL	2.5028	0.000820295
Ig gamma-2 chain C region	Q6N093;P01859;Q6MZU6;Q68CN4	DKFZp686I04196;IGHG2;DKFZp686C15213;DKFZp686E23209	5.99814	0.00090859
Serum amyloid P-component;Serum amyloid P-component(1-203)	V9HWP0;P02743	HEL-S-92n;APCS	4.09364	0.000986624
60 kDa heat shock protein, mitochondrial	A0A024R3X4;P10809;B3GQS7;B7Z597;B7Z5E7;B7Z4F6	HSPD1	0.604302	0.0010488
Sarcalumenin	B4DYT9;Q86TD4;B3KPP4	SRL	-1.79631	0.00117417
Glycogen [starch] synthase, muscle	P13807;Q53ER0;A8K6K7;B7Z806;B7Z6I6	GYS1	-1.26272	0.00117417
Transketolase	B4E022;V9HWD9;Q53EM5;P29401;A0A0B4J1R6;B3KSI4;A0A0K0K1H9;B3KPZ8;B4DVU1	HEL107;TKT	1.16572	0.00117417
Myosin-10	P35580	MYH10	0.70568	0.00136162
Very long-chain specific acyl-CoA dehydrogenase, mitochondrial	P49748;Q53HR2;B4DEA8;B3KPA6;B3KPX1	ACADVL	-1.11914	0.00141409
Ribonuclease inhibitor	A0A140VJT8;P13489;A0A024RC87	RNH1	0.872389	0.0015124
NA	A5YM51	MYH7	-5.32719	0.00163238
Filamin-A	P21333;Q5HY54;Q60FE6;Q60FE5	FLNA	1.34413	0.0018124
Eukaryotic translation elongation factor 1 epsilon-1	O43324;D6RBD7;C9J1V9;H0YAL7	EEF1E1;EEF1E1-BLOC1S5	0.861218	0.00190462
Actin-related protein 2/3 complex subunit 2	Q53R19;O15144;Q9BXV5;A0A024R408	ARPC2	0.811945	0.00231356
Transmembrane protein 109	B2R9T9;Q9BVC6;B4E1S3	TMEM109	1.17698	0.00232838
Protein S100-A1;Protein S100	A0A0S2Z4H2;P23297;Q5T7Y5;Q5T7Y4;Q5T7Y6	S100A1	-5.9095	0.00252284
Actin-related protein 2	P61160;Q8IY98;F5H6T1;B4DHK9;B4DWQ5	ACTR2	0.925331	0.00252284
Phosphoglycerate mutase 1;Phosphoglycerate mutase	Q6P6D7;Q6FHU2;P18669;Q53G35;Q6FHK8;B4DKL5;B4DMJ7	PGAM1;hCG_2015269	0.777643	0.00262542
Galectin;Galectin-3	Q86TY5;A0A024R693;Q59FR8;P17931;Q6FGL0;G3V3R6	hCG_22119;LGALS3	0.931298	0.00262542
3-mercaptopyruvate sulfurtransferase;Sulfurtransferase	A0A140VJX3;P25325;Q2VEU1;B1AH49;Q59HD5	MPST	1.04407	0.00262542
Serine protease HTRA2, mitochondrial	O43464;A0A0C4DG44;A8K7G2	HTRA2	1.61882	0.00262542
Annexin;Annexin A5	V9HWE0;P08758;D6RBE9;D6RBL5;E9PHT9	HEL-S-7;ANXA5	1.03124	0.00275084
Tubulin alpha-1B chain	B3KT06;B3KPS3;P68363;A8JZY9;B4DDU2;F8VVB9	TUBA1B	0.607144	0.00291078
L-lactate dehydrogenase;L-lactate dehydrogenase A chain	V9HWB9;P00338;B4DJI1;F5GYU2;F5GXY2	HEL-S-133P;LDHA	0.86246	0.00299664
Lamina-associated polypeptide 2, isoforms beta/gamma;Thymopoietin;Thymopentin	A0A024RBE7;P42167;G5E972	TMPO	1.31411	0.00299664
Alpha-actinin-2	P35609;B7Z2N5;B7Z4P6;Q59FD9;B7Z4K1;F6THM6	ACTN2	-0.859221	0.00299864
26S proteasome non-ATPase regulatory subunit 5	A8K4T6;Q16401	PSMD5	1.01415	0.00299864
ELKS/Rab6-interacting/CAST family member 1	X6RLX0;Q8IUD2;G8JLD3;X6RM00;B4DG07	ERC1	1.1065	0.00299864
Splicing factor, proline- and glutamine-rich	Q86VG2;P23246;Q9BSV4;Q6PIX2	SFPQ	0.811955	0.00323507
NADH-cytochrome b5 reductase 1	Q9UHQ9;H7C0R7	CYB5R1	-0.923559	0.00336098
Alpha-2-macroglobulin	P01023	A2M	2.29961	0.00336098
NA	B7Z964;H7C3M8	SLMAP	-1.04598	0.00340162
Aspartate--tRNA ligase, cytoplasmic	A0A140VJW5;P14868;D3DP78;Q53T60	DARS	0.842043	0.00388161
Annexin;Annexin A1	Q5TZZ9;P04083;B5BU38	ANXA1	1.7371	0.00388161
Hemoglobin subunit beta;LVV-hemorphin-7;Spinorphin	D9YZU5;P68871;C8C504;Q0Z944;Q9BWV6;Q9GZL9;B3VL86;Q14473;Q8IZI0;Q3LR79;Q4TWB7;A0A1B4WRL5;Q9UK54;B3VL31;Q6V0K9;Q52MT0;E9NGZ5;B3VL05;Q4JLR8;B2M1S6;B5ANL9;F8W6P5;Q3Y9I8;Q4TZM4;B3VL17	HBB	1.91942	0.00388161
Retinal dehydrogenase 1	V9HW83;V9HVX6;P00352;B4DDF8;B4DXX3;Q59EJ0	HEL-S-53e;HEL-9;ALDH1A1	3.47381	0.00388161
NADH dehydrogenase [ubiquinone] 1 alpha subcomplex subunit 6	A0A0C4DGS0;P56556;R4GN43	NDUFA6	-1.51596	0.003905
60S ribosomal protein L26	Q6IBH6;P61254;J3QRI7;J3QQQ9;J3QQV1;J3KTJ8;J3QRC4;A0A024RBF6	RPL26;hCG_26523	0.835203	0.003905
UV excision repair protein RAD23 homolog B	P54727;B4DEA3;Q53F10;B7ZA74;B7Z4W4;Q5W0S5	RAD23B	0.915235	0.00396934
Heterochromatin protein 1-binding protein 3	Q5SSJ5;X6RGJ2;B0QZK4;Q5SWC8	HP1BP3	0.819403	0.00401505
Retinol-binding protein 1	P09455;A0A0A0MTB9;H0YAK8;A0A0A0MQT0	RBP1	1.13595	0.00401505
Myosin light polypeptide 6	F8W1R7;G3V1V0;P60660;J3KND3;G8JLA2;B7Z6Z4;G3V1Y7;F8VPF3;Q6IBG5;F8VZU9;F8W180	MYL6	1.21669	0.00401505
NA	Q8N7A6	NA	3.67014	0.00437083
Collagen alpha-1(I) chain	P02452;Q6LAN8;H9C5C5	COL1A1	2.11041	0.00458315
Versican core protein	A0A024RAQ9;Q59FG9;P13611;E9PF17;A0A024RAP3;A0A024RAL1;D6RGZ6	CSPG2;VCAN	1.43868	0.00483929
Ras-related protein Rap-2c	Q9Y3L5	RAP2C	1.40761	0.00505057
Troponin I, cardiac muscle	Q6FGX2;B6D427;P19429;Q6FGU5;K7EN02	TNNI3	-1.67857	0.00507952
Alpha-adducin	E7EV99;E7ENY0;P35611;Q96D30;A0A0A0MSR2;Q4TT76;H0Y9H2	ADD1;LA04NC01-25A3.2-001	1.02845	0.00536285
Single-stranded DNA-binding protein;Single-stranded DNA-binding protein, mitochondrial	Q567R6;A4D1U3;Q04837;A0A0G2JLD8;E7EUY5;B7Z268;C9K0U8	SSBP1	0.695326	0.00569139
Dynactin subunit 3	O75935;X6RA56;X6RCK5;A0A0A0MRV8;Q8NB28;X6RLR1	DCTN3	1.15432	0.00569139
60S ribosomal protein L18a	M0R117;B4DM74;Q02543;M0R3D6;M0R1A7;B4DM94;B4DUV3;B2R4C0;Q53HD3;M0R0P7;Q32XH3	RPL18A	0.574241	0.0057063
Heterogeneous nuclear ribonucleoprotein M	P52272;A0A087X0X3;Q59ES8;Q7KYM9	HNRNPM;ORF	0.704034	0.0057063
Glutathione S-transferase omega-1	V9HWG9;B2R983;P78417;Q5TA02	HEL-S-21;GSTO1	0.869386	0.0057063
Leucine-rich PPR motif-containing protein, mitochondrial	E5KNY5;P42704;B4DSR0	LRPPRC	0.732662	0.00573506
60S ribosomal protein L3	P39023;Q8TBW1;Q96QL0;B3KS36;Q9NY85;G5E9G0;Q49AJ9;Q9BT63;B5MCW2;H7C422;H7C3M2	RPL3;rpl3	0.666964	0.00575716
Guanine nucleotide-binding protein G(i) subunit alpha-2	P04899;B3KX51;Q96C71;B3KP24;Q93020	GNAI2;WUGSC:H_LUCA16.1	0.721824	0.00584407
Histone H1.4	Q4VB24;A3R0T8;P10412;B2R984;A3R0T7	HIST1H1E	0.726862	0.00586554
Talin-1	Q9Y490	TLN1	0.805835	0.00633996
ADP-ribosylation factor 1;ADP-ribosylation factor 3	A0A024R3Q3;A0A024R0Y6;P84077;P61204;F5H423;B4E190;B4DN70;B4DEB9;B4DJC8	ARF1;ARF3	0.76036	0.00635301
Rho GTPase-activating protein 1	Q07960;B4DPZ4;H0YE29	ARHGAP1	1.04141	0.00654993
Prelamin-A/C;Lamin-A/C	P02545;Q5I6Y5;Q8N519	LMNA	0.677111	0.00665679
Flap endonuclease 1	Q6FHX6;P39748;B4DWZ4;I3L3E9	FEN1	1.87543	0.00693274
Dolichyl-diphosphooligosaccharide--protein glycosyltransferase subunit 1	Q6IBR0;P04843;Q96HX3;Q53EP4;B4DL99;B7Z4L4;B4DNJ5	RPN1	0.599834	0.00726957
Beta-2-syntrophin	A0A024R732;Q13425;H0YCS0	SNTB2	1.04405	0.00781065
Histone H2A.V;Histone H2A.Z;Histone H2A	Q71UI9;P0C0S5;C9J0D1;C9J386	H2AFV;H2AFZ	0.631078	0.00791002
NA	A0A024R9B9;A0A024R9H1	MATN2	1.13833	0.00824006
Alpha-1,4 glucan phosphorylase;Glycogen phosphorylase, liver form	B2R825;P06737;E9PK47	PYGL	0.757564	0.00827744
Serotransferrin	Q53H26;Q06AH7;P02787;B4DI57;B4DHZ6	TF	1.08058	0.00829799
Tumor protein D54	A0A087WYR3;Q68E05;Q6FGS1;O43399;Q53GA0;A0A087WZ51;Q5J908	TPD52L2;DKFZp686A1765	0.926263	0.00860268
Dolichyl-diphosphooligosaccharide--protein glycosyltransferase subunit 2	B2RE46;P04844;B4DJL0	RPN2	0.62457	0.00896347
Glutathione peroxidase;Glutathione peroxidase 3	A0A087X1J7;P22352	GPX3	3.80717	0.00901444
Isocitrate dehydrogenase [NAD] subunit, mitochondrial;Isocitrate dehydrogenase [NAD] subunit alpha, mitochondrial	B4DJB4;P50213;H0YL72;B4DSY4;B7Z9J8;H0YMU3	IDH3A	0.523196	0.00912093
NA	F6WQW2;C9JDM3	RANBP1	1.17952	0.00912093
Cytoskeleton-associated protein 4	A0A024RBH2;Q07065;B3KVX6;Q8TB01;Q6NWZ1	CKAP4	0.732374	0.00921458
Lysosome membrane protein 2	A0A024RDG6;Q14108	SCARB2	1.11039	0.00921458
Adenylyl cyclase-associated protein;Adenylyl cyclase-associated protein 1	D3DPU2;B2RDY9;B4DNW7;Q01518;B4DI38;B4DNY3;B4DNA3;B4DUZ8	CAP1	0.998017	0.0096522
Glutaredoxin-3	A0A140VJK1;O76003	GLRX3	1.6843	0.00990926
Creatine kinase S-type, mitochondrial	A0A024RAK5;P17540;B2R8A3;B3KVA7	CKMT2	-1.1239	0.00992022
Histidine-rich glycoprotein	B2R8I2;P04196	HRG	3.49762	0.00992715
Isocitrate dehydrogenase [NADP];Isocitrate dehydrogenase [NADP] cytoplasmic	V9HWJ2;O75874;Q0QER2;V9HW78;Q6FIA4;B2R5M8;Q6FI37	HEL-S-26;IDH1;HEL-216	0.715344	0.010018
Serine/threonine-protein phosphatase 2B catalytic subunit alpha isoform;Serine/threonine-protein phosphatase	A0A0S2Z4C6;Q08209;A0A0S2Z4B5;E7ETC2;Q9UMM5	PPP3CA	1.2686	0.0101103
Histone H2B;Histone H2B type 1-C/E/F/G/I;Histone H2B type 1-K;Histone H2B type F-S	B2R4S9;P62807;A0A024RCL8;O60814;P57053;Q0D2M2	HIST1H2BI;HIST1H2BC;HIST1H2BK;H2BFS	0.678437	0.0104269
DNA helicase;DNA replication licensing factor MCM7	B2RBA6;A0A0S2Z4A5;P33993;C6EMX8;B3KUD7	MCM7	1.18944	0.0104269
Isochorismatase domain-containing protein 1	Q96CN7;D6RGE2;Q9Y3B5	ISOC1	0.748953	0.0104658
Xin actin-binding repeat-containing protein 1	Q702N8	XIRP1	-0.737926	0.0107735
Troponin I, slow skeletal muscle	A0A024R959;B3KW26;A0A087WT47;P19237;G3V489;G3V4F8;G3V3L5	TNNI1	1.50629	0.0116567
DNA fragmentation factor subunit alpha	Q53HN4;O00273;A0A024R4H5	DFFA	1.78694	0.0116567
PDZ and LIM domain protein 1	V9HW92;O00151	HEL-S-112;PDLIM1	-0.966631	0.0117332
Kinectin	A0A024R663;Q86UP2	KTN1	1.09134	0.0118455
T-complex protein 1 subunit gamma	B3KX11;P49368;Q59H77;Q2TU64;B4DUR8	CCT3	0.511459	0.012513
RuvB-like 1	B5BUB1;Q9Y265;E7ETR0;B3KRS7	RUVBL1	0.739942	0.012513
Ras-related C3 botulinum toxin substrate 1;Ras-related C3 botulinum toxin substrate 3;Ras-related C3 botulinum toxin substrate 2	A4D2P1;A4D2P0;P63000;A4D2P2;A0A024R9T5;A0A024R1P2;P60763;P15153	RAC1;hCG_20693;RAC2;RAC3	0.873315	0.012513
26S proteasome non-ATPase regulatory subunit 14	A0A140VKF2;O00487;Q53TH1;Q59G89	PSMD14	0.910926	0.012513
Calsequestrin-2;Calsequestrin	O14958;B4DEF0	CASQ2	-1.62715	0.0125472
Fibrillin-1	P35555;Q75N88	FBN1	1.79191	0.0127979
Diphosphoinositol polyphosphate phosphohydrolase 2	A0A024RBD0;Q9NZJ9;F8VRL4;F8VRR0;A0A0C4DGJ4	NUDT4	1.53147	0.0128192
60S ribosomal protein L10a;Ribosomal protein	P62906;Q1JQ76;A0A024RCW3	RPL10A	0.681859	0.0134004
T-complex protein 1 subunit delta	P50991;A8K3C3;B7Z9L0;B7Z2Z8;B7Z2F4	CCT4	0.637558	0.0135957
AP complex subunit beta;AP-2 complex subunit beta	A8K916;A0A140VJE8;P63010;H0UID5;H0UID4;H0UID3;A8K0G3;Q68DI0;A0A087X253;B4DWG4;A0A087WU93;A0A087WZQ6;B4E261;A0A087WYD1;Q96EL6	AP2B1;DKFZp781K0743	0.888973	0.0137547
X-ray repair cross-complementing protein 5	P13010;Q53T09	XRCC5	0.67206	0.0139536
Hemoglobin subunit alpha	D1MGQ2;P69905;U6A216;E9M4D4;I1VZV6;A0A0K2BMD8;Q4ZGM8;E1B2D1;V9H1D9;Q9BX83;Q96T46	HBA2;HBA1	2.08749	0.0140188
Integrin beta-1	P05556	ITGB1	0.62011	0.0142824
28S ribosomal protein S23, mitochondrial	J3QLR8;Q9Y3D9	MRPS23	1.01012	0.0143758
Transgelin	Q6FI52;Q5U0D2;Q01995;Q53GC9;H0YCU9;Q59FA5	TAGLN	1.46425	0.0143758
Lipoma-preferred partner	B7ZLW0;Q93052;A0A087WZF1;B7Z8W0;C9JUT4	LPP	0.933123	0.0145667
Vesicle-associated membrane protein-associated protein A	A8KA83;Q9P0L0	VAPA	1.37113	0.0146761
Thioredoxin	H9ZYJ2;P10599	TXN	0.691794	0.0148208
Prostaglandin F2 receptor negative regulator	Q9P2B2	PTGFRN	1.01106	0.0148208
Ubiquitin-protein ligase E3A	Q9H2G0;Q5W7F7;Q9BUI6;Q05086;A0A1B0GVL3;A0A0D9SG77;Q96GR7	UBE3A	1.15902	0.0161063
NA	D3DTX7	COL1A1	1.16909	0.0161063
U6 snRNA-associated Sm-like protein LSm4	V9GZ56;Q9Y4Z0;M0QXB0;U3KQS7;U3KQK1	LSM4	1.07587	0.0163717
Dihydrolipoyllysine-residue succinyltransferase component of 2-oxoglutarate dehydrogenase complex, mitochondrial	A0A024R6C9;P36957;Q6IBS5;Q86TQ8;Q86TW7	DLST	-0.975356	0.0164045
60S ribosomal protein L4	P36578;Q53G74;B4DMJ6;H3BM89;B4DFI6;B4DMJ2	RPL4	0.533475	0.0164045
Coronin	J3KSS5;J3QRV4	CORO6	1.51102	0.0164045
40S ribosomal protein S3a	Q6NXR8;A8K4W0;P61247;D6RG13;D6RAT0;B7Z3M5;D6RB09;E9PFI5;H0Y9Y4;H0Y8L7;D6R9B6;D6RAS7	RPS3A	0.689392	0.0171315
Peptidyl-prolyl cis-trans isomerase;Peptidyl-prolyl cis-trans isomerase B	V9HWC6;P23284	HEL-S-39;PPIB	0.707707	0.017365
Nucleolin	A0A024R4A0;P19338;B3KTP9;B3KM80;Q6ZS99;Q9BQ02;H7BY16	NCL	0.93487	0.017365
Proteasome subunit beta type-2;Proteasome subunit beta type	A0A140VJS6;P49721;B7Z478;Q59FJ0	PSMB2	0.804466	0.0173838
General vesicular transport factor p115	A0A024RDG1;O60763	VDP;USO1	0.862994	0.0173838
Probable ubiquitin carboxyl-terminal hydrolase FAF-X;Ubiquitin carboxyl-terminal hydrolase	Q93008;D3DWB6	USP9X	0.903045	0.0173838
Biglycan	A6NLG9;B4DDQ2;Q53FI4;A8K7E0;P21810;B3KS75;Q53HU6;Q8NAB7;B4DNL4;B4DQD6;B4DDN7	BGN	1.6979	0.0173838
Calcium-binding mitochondrial carrier protein SCaMC-1	Q6NUK1;B7ZB41;B4E290	SLC25A24	0.965444	0.0178543
60S ribosomal protein L30	E5RI99;A0A024R9D3;P62888	RPL30	1.09146	0.0180587
Heterogeneous nuclear ribonucleoprotein U-like protein 2	Q1KMD3;H3BQZ7	HNRNPUL2;HNRNPUL2-BSCL2	0.684466	0.0191662
Putative elongation factor 1-alpha-like 3;Elongation factor 1-alpha;Elongation factor 1-alpha 1	Q5VTE0;Q6IPT9;Q6IPS9;Q6IPN6;Q53HM9;P68104;A8K9C4;Q53HR5;Q53HQ7;Q53GA1;Q53G85;Q96RE1;A0A087WVQ9;B4DV42;A0A087WV01;Q9H2I7;Q53G89;Q8IUB0;Q53HR1;B4DNE0;Q504Z0;B4E2C5;Q16577	EEF1A1P5;EEF1A1;EEF1A1L14;PTI-1	0.487656	0.0195785
ATP-dependent Clp protease ATP-binding subunit clpX-like, mitochondrial	A0A024R5X7;O76031;Q9H072	CLPX;DKFZp586J151	1.00811	0.0196981
Protein arginine N-methyltransferase 1	E9PKG1;Q5U8W9;H7C2I1;Q99873;A0A087X1W2;E9PIX6;B4DJ87	PRMT1;HRMT1L2	1.20722	0.01977
Voltage-dependent anion-selective channel protein 3	Q9Y277;E5RJN6;E5RHZ6	VDAC3	0.685159	0.0201896
Staphylococcal nuclease domain-containing protein 1	A0A140VK49;Q7KZF4;B2R5U1;Q59FF0;B4E299;B3KU67	SND1	0.561157	0.0202093
40S ribosomal protein S12	P25398	RPS12	0.620821	0.0205038
Complement C3;Complement C3 beta chain;C3-beta-c;Complement C3 alpha chain;C3a anaphylatoxin;Acylation stimulating protein;Complement C3b alpha chain;Complement C3c alpha chain fragment 1;Complement C3dg fragment;Complement C3g fragment;Complement C3d fragment;Complement C3f fragment;Complement C3c alpha chain fragment 2	V9HWA9;P01024;B4E216	HEL-S-62p;C3	1.71987	0.0205038
FACT complex subunit SSRP1	A0A024R4Z6;Q08945	SSRP1	1.25234	0.0205092
Prolow-density lipoprotein receptor-related protein 1;Low-density lipoprotein receptor-related protein 1 85 kDa subunit;Low-density lipoprotein receptor-related protein 1 515 kDa subunit;Low-density lipoprotein receptor-related protein 1 intracellular domain	Q07954;Q59FG2	LRP1	0.99946	0.0206182
Myomesin-1	P52179;A8MX12	MYOM1	-0.704454	0.0209858
NA	E9PDN5;A0A075B6G3;A0A087WV90;A0A087WTU7	DMD	0.614709	0.0209858
Ras-related protein Rab-11B;Ras-related protein Rab-11A	Q15907;H3BMH2;H3BSC1;A0A024R5Z8;P62491;B4DMN1	RAB11B;RAB11A	0.780464	0.0221173
Propionyl-CoA carboxylase beta chain, mitochondrial	E7EX59;E9PDR0;Q59GV0;P05166;E7EUY3;E7ETT1;C9JQS9;A0A1B2JLU8;E7ETT4;B7Z8A8;E9PEC3;F8WBI9;B7Z7U9;Q9HBR7	PCCB	0.761387	0.0228409
NADH dehydrogenase [ubiquinone] iron-sulfur protein 4, mitochondrial	A0A0S2Z433;O43181;H0Y9M8	NDUFS4	-1.03458	0.0229237
Alpha-enolase;Enolase	A0A024R4F1;P06733;E2DRY6	ENO1	0.489925	0.0230692
Nuclear ubiquitous casein and cyclin-dependent kinase substrate 1	Q9H1E3;B4DTY3;Q6IA16	NUCKS1;NUCKS	0.976693	0.0234021
Citrate lyase subunit beta-like protein, mitochondrial	A0A024RE03;Q8N0X4;B4DU60;Q5JVC2	CLYBL	0.995557	0.0237859
Fibrinogen gamma chain	C9JC84;P02679;A0A140VJJ6;C9JEU5;D3DP16;Q7Z664	FGG;DKFZp779N0926	3.00573	0.0241946
Alpha-parvin	J3KNQ4;Q9NVD7;B7Z952;E9PS97	PARVA	1.23141	0.0242797
Serine--tRNA ligase, mitochondrial	M0QWZ7;Q9NP81;M0R2C6;B4DXB9;M0R259;A0A024R0H0	SARS2	1.49105	0.0243821
Palladin	Q8WX93;B2RTX2	PALLD	0.682248	0.0246134
Methyl-CpG-binding protein 2	A0A140VKC4;E9LUH3;D3YJ43;D0UU70;E9LUH4;P51608;E1B2J3;C6KG45;D9ZNA4;D5L9I5;A8K079;D6QZ43;A0A087X1U4;C6KG44;I6LM39;A0A075BPP5;A0A0S2Z401	MECP2	1.04176	0.0248652
Ketimine reductase mu-crystallin	Q14894;I3L325;I3NI53;I3L2W5	CRYM	-1.91188	0.0256318
Protein-glutamine gamma-glutamyltransferase 2	V9HWG3;P21980;B4DIT7;B4DTN7	HEL-S-45;TGM2	0.632778	0.0256318
Elongation factor 1-gamma	Q53YD7;P26641;B4DUP0	EEF1G	0.844687	0.0256318
Protein S100-A13	Q99584	S100A13	1.4416	0.0256318
Heterogeneous nuclear ribonucleoprotein D0	A0A024RDF4;A0A024RDF3;Q14103;H0Y8G5;D6RAF8	HNRPD;HNRNPD	0.755248	0.0257767
Plectin	Q15149	PLEC	-0.42705	0.0260004
Vinculin	A0A024QZN4;V9HWK2;P18206;Q5JQ13	VCL;HEL114	-0.646744	0.0265974
Triosephosphate isomerase	V9HWK1;P60174;Q53HE2;B4DUI5;U3KPZ0	HEL-S-49;TPI1	0.453827	0.0266323
Microtubule-associated protein RP/EB family member 2	A0A024RC33;Q15555	MAPRE2	-1.42436	0.0280068
NADH-ubiquinone oxidoreductase chain 5	Q5S9U8;A0A1B0W1F8;A0A075X6P1;Q53ZV6;H9A7H1;D7P652;D7P639;D7P626;B8X5X6;B2XIN1;A0A059RIX9;A0A023REG7;A0A023QG09;X5CM76;X5CKG0;X5CI32;X5CF88;X5CBQ3;X5BYA7;X5BWL7;X5BWF0;X5BVZ3;X5BVA2;X5BV52;X5BPC3;X2JJ49;W8DRA6;W8DIL7;W8DCA6;W8DBU7;W8DBM7;W8DAS2;W8D9V0;W8D9F9;W8D8R1;W0C6Q7;W0C3F1;V9PAU1;V9PAR5;V9PA42;V9NA48;V9N990;V9N6Q0;V9N6J1;V9N5T7;V9N4K8;V9M765;V9K141;V9JYL6;V9JXJ3;V9JTH7;V9JMS4;V9JLL5;V9JJF5;V…	ND5;NADH5;ndh5;MT-ND5	1.02858	0.0282888
Tubulointerstitial nephritis antigen-like	F6SDV2;Q9GZM7;B4DVG5	TINAGL1	-1.74393	0.0295497
T-complex protein 1 subunit eta	Q53HV2;Q99832;Q6IBT3;B7Z7I4;B7Z1C9	CCT7	0.542791	0.0295497
40S ribosomal protein S23	A8K517;P62266;D6RD47	RPS23	0.592176	0.0295497
Basal cell adhesion molecule	A0A087WXM8;I7L574;I7KDP0;G0TQY6;A0A0A1TTQ0;P50895;A0A068W6H0;K7ENU8	BCAM;LU	0.622028	0.0295497
Serine/threonine-protein phosphatase;Serine/threonine-protein phosphatase PP1-beta catalytic subunit	V9HW04;P62140;B7ZB67;B4DJ75;E7ETD8	HEL-S-80p;PPP1CB	0.82936	0.02962
Mannosyl-oligosaccharide glucosidase	Q13724;C9J8D4	MOGS	1.52681	0.02962
Coxsackievirus and adenovirus receptor	P78310	CXADR	1.5722	0.02962
3-ketoacyl-CoA thiolase, mitochondrial	B2RB23;P42765;A0A0B4J2A4;B3KNP8;K7EME0	ACAA2	-1.09174	0.0307691
Septin-2	Q15019;C9J938;C9JB25	43345	0.693938	0.0307691
Keratin, type I cytoskeletal 18	B2RA03;A0A024RAY2;P05783;F8VZY9;I6L965	KRT18	0.70986	0.0307691
Isocitrate dehydrogenase [NAD] subunit gamma, mitochondrial;Isocitrate dehydrogenase [NAD] subunit, mitochondrial	P51553;D3DWV9;E9PF84;G5E9Q7;E7EQB8;O15384	IDH3G;hCG_2004980	0.959637	0.0307691
Ubiquitin carboxyl-terminal hydrolase 5	A0A140VJZ1;P45974	USP5	0.706304	0.0310091
60S ribosomal protein L24	C9JXB8;C9JNW5;V9HW01;P83731	RPL24;HEL-S-310	0.483395	0.0310816
Estradiol 17-beta-dehydrogenase 8	Q92506	HSD17B8	0.654493	0.0310816
Tropomyosin alpha-1 chain	A0A0S2Z4G6;D9YZV4;P09493;H0YL52	TPM1	-0.899905	0.0315307
Tricarboxylate transport protein, mitochondrial	Q6LAP8;D9HTE9;P53007;B4DP62	SLC25A1	0.539584	0.0317483
14-3-3 protein sigma	P31947	SFN	0.397971	0.0320063
Vasodilator-stimulated phosphoprotein	A0A0S2Z4I9;A0A0S2Z4N8;A0A024R0V4;P50552;A0A0S2Z4I7	VASP	1.08054	0.0323045
3-hydroxyisobutyrate dehydrogenase;3-hydroxyisobutyrate dehydrogenase, mitochondrial	A0A024RA75;P31937	HIBADH	0.770641	0.0326396
NADH dehydrogenase [ubiquinone] iron-sulfur protein 2, mitochondrial	O75306;B7Z792;Q53HG2;B7Z9L2	NDUFS2	-0.798312	0.0330251
BTB/POZ domain-containing protein KCTD12	B3KY04;A0A140VJM4;Q96CX2	KCTD12	1.34715	0.0330251
Paxillin	A0A1B0GTU4;F5GZ78;B3KVL0;A0A140VJQ8;A0A1B0GU60;Q59GS5;P49023	PXN	0.852326	0.0336539
Core histone macro-H2A.1;Histone H2A	O75367;B4DJC3;Q59FH0	H2AFY	0.536616	0.0339237
Myomesin-3	Q5VTT5	MYOM3	-2.62862	0.0341799
Mth938 domain-containing protein	Q9H7C9;E9PNP3;E9PR47;E9PIQ4	AAMDC	1.11527	0.0344412
Transducin beta-like protein 2	E9PF19;B4DY50;A0A0S2Z5F3;Q8N2L6;B2RB52;Q9Y4P3;B4DY59;Q96E41	TBL2	1.25315	0.0344412
NEDD8-conjugating enzyme Ubc12	A0A024R4T4;P61081	UBE2M	1.40107	0.0344412
26S proteasome non-ATPase regulatory subunit 1	B2R6D0;Q99460;A0A087WW66;Q05CW6;Q05BX4	PSMD1	0.639879	0.035209
Cystatin-B	Q76LA1;P04080	CSTB	0.76058	0.0357464
Haloacid dehalogenase-like hydrolase domain-containing protein 3	B3KUF6;A0A024R837;Q9BSH5	HDHD3	1.13004	0.0357464
tRNA-splicing ligase RtcB homolog	Q9Y3I0	RTCB	0.627712	0.0358437
Transforming protein RhoA	A0A024R324;P61586;B4DKN9;Q9BVT0	RHOA;ARHA	1.3606	0.0360772
Glyceraldehyde-3-phosphate dehydrogenase	V9HVZ4;P04406;Q2TSD0;E7EUT5;Q0QET7	HEL-S-162eP;GAPDH	0.411486	0.0371951
60S ribosomal protein L32	D3YTB1;A0A024R2G7;F8W727;P62910	RPL32	0.8056	0.0373972
Quinone oxidoreductase	Q08257;A6NP24;C9JH92	CRYZ	0.700555	0.0382688
Septin-9	A0A0S2Z5A5;A0A024R8V0;Q9UHD8;A0A024R8Q0;A0A0S2Z5W9	43352	0.984029	0.0384971
Actin, alpha cardiac muscle 1;Actin, aortic smooth muscle;Actin, gamma-enteric smooth muscle	P68032;D2JYH4;A8K3K1;P62736;P63267;B3KW67;Q13707	ACTC1;ACTA2;ACTG2	-0.802718	0.0388
NA	Q7Z3B7	DKFZp451N061	0.787217	0.0388
NADPH--cytochrome P450 reductase	B2R6E5;A8K3B4;Q59ED7;P16435;Q63HL4;B4DKM8;E7EMD0;B4DDH3	POR;DKFZp686G04235	1.88339	0.0388
Actin, cytoplasmic 2;Actin, cytoplasmic 2, N-terminally processed	P63261;B4E3A4;B4DVQ0;I3L3I0;I3L1U9	ACTG1	0.934049	0.0394799
40S ribosomal protein S15a	B2R4W8;P62244;I3L3P7;A8K7H3;I3L246	hCG_1994130;RPS15A	0.434207	0.039745
Haptoglobin;Haptoglobin alpha chain;Haptoglobin beta chain	P00738;A0A0C4DGL8;J3QLC9;J3QR68;H0Y300;Q6NSB4;A0A087WU08;Q6PEJ8;B3KP77;H3BS21	HP	2.36747	0.0400868
cAMP-dependent protein kinase type II-beta regulatory subunit	Q6DHZ2;A0A024R712;P31323;B3KY43;Q75MP1	PRKAR2B	1.26757	0.0409815
NA	B9EH95;Q8NAH4	ARVCF	0.847692	0.0420299
Cullin-associated NEDD8-dissociated protein 1	A8K8U1;Q86VP6;A0A0C4DGH5	CAND1	0.871578	0.0422683
Aldehyde dehydrogenase X, mitochondrial	P30837	ALDH1B1	0.630808	0.0422749
Threonine--tRNA ligase, cytoplasmic	Q53GX7;P26639;B2RDX5;B4DKZ9;Q5M7Z9;B3KTN2	TARS	0.852023	0.0424969
Acetyl-CoA acetyltransferase, mitochondrial	A0A140VJX1;P24752	ACAT1	-0.830294	0.0434558
Sodium/potassium-transporting ATPase subunit alpha-1	P05023	ATP1A1	0.543711	0.0434558
Histone H4	B2R4R0;P62805;Q0VAS5	HIST1H4H;HIST1H4A	0.659563	0.0449088
28S ribosomal protein S5, mitochondrial	P82675	MRPS5	0.834606	0.0449088
Serine protease HTRA1	Q92743;Q05DJ8;B3KRN4	HTRA1	0.884034	0.0449088
Collagen alpha-1(VI) chain	A0A087X0S5;P12109;Q8TBN2	COL6A1	1.36461	0.0449088
Hydroxyacyl-coenzyme A dehydrogenase, mitochondrial	A0A140VK76;A0A0A0MSE2;Q16836;E9PF18	HADH	-0.780528	0.0449519
Glycogen debranching enzyme;4-alpha-glucanotransferase;Amylo-alpha-1,6-glucosidase	A0A0S2A4E4;P35573;A0A0M4G3H8;G1UI17	AGL	0.451539	0.0451978
Pyruvate kinase;Pyruvate kinase PKM	V9HWB8;P14618;B4DNK4;Q8WUW7	HEL-S-30;PKM;PKM2	0.512598	0.0455217
Cytochrome c oxidase subunit 7C, mitochondrial	P15954;D6R9Z7;Q71U45	COX7C	0.945204	0.0456543
Deoxyuridine 5-triphosphate nucleotidohydrolase, mitochondrial	P33316;H0YNW5;H0YKC5;H0YKI0;A0A0C4DGL3;H0YMM5;H0YNJ9	DUT	0.946942	0.0458531
Obg-like ATPase 1	J3KQ32;Q9NTK5;Q53SQ6	OLA1;PTD004	1.09544	0.0467961
Ferritin;Ferritin heavy chain;Ferritin heavy chain, N-terminally processed	Q6NZ44;B3KXC3;A0A024R525;P02794;Q6NS36;G3V192;G3V1D1;E9PRK8;E9PKY7;Q8TD27	FTH1	-1.51346	0.0469359
Peroxiredoxin-5, mitochondrial	V9HW35;P30044	HEL-S-55;PRDX5	0.401887	0.0469359
Dual specificity protein phosphatase 3	B5BUI8;P51452	DUSP3	0.675233	0.0469359
MICOS complex subunit MIC27	A0A087WUX8;A0A087WYF7;Q6UXV4;Q68DW4	APOOL;DKFZp779P1227	0.899734	0.0469359
Acyl-CoA-binding protein	P07108;B8ZWD1;A0A024RAF2;A0A0A0MTI5;B8ZWD9;B8ZWD8	DBI	-1.08069	0.0469515
Glutathione S-transferase P	V9HWE9;P09211;A8MX94	HEL-S-22;GSTP1	0.710181	0.0469672
A-kinase anchor protein 12	Q02952	AKAP12	1.4646	0.0470687
Filamin-B	A0A024R321;O75369;Q68CT4;E7EN95	FLNB;DKFZp686A1668	1.32461	0.0471766
Desmoglein-2	Q14126	DSG2	1.47553	0.0475401
NA	CON__P00761	NA	-2.70696	0.0482455
Translocon-associated protein subunit alpha	C9J3L8;C9J5W0;B2R6N9;E9PAL7;C9IZQ1;P43307	SSR1	0.734591	0.0485538
S-formylglutathione hydrolase	A0A140VJJ2;P10768;X6RA14;H7BZT7	ESD	0.782162	0.0485538
Acyl-CoA synthetase family member 2, mitochondrial	Q96CM8;E9PF16;B4DTB9	ACSF2	1.17624	0.0485538
Septin-10	E7EW69;A8K7M3;E7EX04;B5ME97;Q9P0V9;B7Z371;Q59H84;Q9H9P7	43353	1.65819	0.0485538
Hypoxia up-regulated protein 1	A0A087X054;Q9Y4L1;B7Z2N4;B3KXH0;B7Z766;E9PJ21;Q05D91;A0A087WWI4;Q6IN67;K7EQK2;B7Z602	HYOU1	0.538147	0.0490821
Integrin alpha-V;Integrin alpha-V heavy chain;Integrin alpha-V light chain	A5YM53;L7RXH0;P06756	ITGAV	0.893561	0.0504133
NSFL1 cofactor p47	Q9UNZ2;Q53FE8;Q53FF5;F2Z2K0	NSFL1C	0.557099	0.0509856
Voltage-dependent anion-selective channel protein 1	P21796;B3KTS5	VDAC1	0.45409	0.0515073
40S ribosomal protein S4;40S ribosomal protein S4, X isoform	Q96IR1;B2R491;P62701;Q53HV1	RPS4X	0.566443	0.0515073
ATP-dependent RNA helicase DDX42	Q86XP3;A0A0A0MSJ0	DDX42	0.967894	0.0517682
CAD protein;Glutamine-dependent carbamoyl-phosphate synthase;Aspartate carbamoyltransferase;Dihydroorotase	F8VPD4;P27708;Q53SY7	CAD	1.14783	0.0517682
60S ribosomal protein L27	E4W6B6;B2R4D8;A0A024R1V4;P61353;K7ELC7;K7EQQ9	RPL27	0.746941	0.0522285
Tubulin-specific chaperone D	J3KR97;Q9BTW9;B4DE53;I6L959	TBCD	0.931932	0.052604
Ig kappa chain C region	Q0KKI6;Q8TCD0;Q5EFE6;Q7Z3Y4;Q6GMX0;P01834;A0A075B6H6	IGKC	2.83465	0.0530395
NHP2-like protein 1;NHP2-like protein 1, N-terminally processed	Q6FHM6;P55769;B1AHD1	NHP2L1	-1.6469	0.0534644
Neuroblast differentiation-associated protein AHNAK	Q09666	AHNAK	0.495485	0.0534644
40S ribosomal protein S16	P62249;M0R210;M0R3H0;M0R1M5;A0A087WZ27;Q6IPX4	RPS16;ZNF90	0.608355	0.0534644
Prefoldin subunit 5	Q99471;H3BPF6	PFDN5	0.993039	0.0545157
Spermine synthase	P52788;H7C2R7;B4DE40	SMS	1.18884	0.0545157
Cytoskeleton-associated protein 5	Q14008	CKAP5	1.6069	0.0545815
Non-POU domain-containing octamer-binding protein	A8K525;A0A0S2Z4Z9;Q15233;H7C367;C9JYS8	NONO	0.688261	0.0546805
NA	B4DJ09	NA	-0.881855	0.0549561
Protein disulfide-isomerase;Protein disulfide-isomerase A3	B3KQT9;V9HVY3;P30101	HEL-S-269;PDIA3	0.480163	0.055888
Protein phosphatase 1 regulatory subunit;Protein phosphatase 1 regulatory subunit 12A	B2RAH5;O14974;A0A024RBF1;F8VZN8	PPP1R12A	0.814593	0.0560618
N(G),N(G)-dimethylarginine dimethylaminohydrolase 2	V9HW53;O95865;A0A140T971;Q5SSV3;Q5SRR8;H0Y7N1	HEL-S-277;DDAH2	0.828322	0.0560618
60S ribosomal protein L23	Q9BTQ7;A0A024R1Q8;P62829;C9JD32;J3KT29;J3KTJ3;B9ZVP7	RPL23	0.503809	0.0562401
Eukaryotic translation initiation factor 3 subunit L	B0QY89;Q9Y262;B4DQF6;B3KPB9;B0QY90;B3KNG0	EIF3L	1.12418	0.0569808
Cytochrome b-c1 complex subunit 7	P14927;B7Z2R2;E5RHG9	UQCRB	-0.804101	0.0570045
Acyl-CoA dehydrogenase family member 9, mitochondrial	Q9H845;Q9H9W4;H0Y8Z9;Q9BUX5;Q59FN3	ACAD9	0.525717	0.057366
Nascent polypeptide-associated complex subunit alpha, muscle-specific form	E9PAV3	NACA	-0.478852	0.0576007
Lamin-B1	P20700;E9PBF6;Q6DC98;A0A0D9SFE5	LMNB1	0.444886	0.0576007
Spliceosome RNA helicase DDX39B	A0A024RCM3;Q13838;A0A0G2JJZ9;Q5STU3;B4DP52;A0A140T9X3;F6WLT2;A0A140T9X9;A0A140T996;F6UJC5;A0A140TA18;A0A0A0MT12;F6TRA5	hCG_2005638;DDX39B	0.522204	0.0576007
Heat shock protein beta-2	A8KAH6;Q16082	HSPB2	0.549657	0.0576007
Membrane-associated progesterone receptor component 1	Q6IB11;O00264	PGRMC1	0.781562	0.0576007
Four and a half LIM domains protein 2	Q6I9R8;Q2XQU9;J3KNW4;A0A0A0MSG2;Q14192;Q2TSB7;I0CE67;Q53T40	FHL2;AAG11	-0.843035	0.0581445
Lysosome-associated membrane glycoprotein 1	B3KRY3;A0A024RDY3;P11279	LAMP1	0.799388	0.0581445
Glyoxalase domain-containing protein 4	F6TLX2;Q9Y3E8;B4DX01;B7Z403;A8K8F0;Q9HC38;B3KV49;I3L3Q4	GLOD4	0.638209	0.0581637
Alpha-actinin-1	A0A024R694;P12814;Q86TX4	ACTN1	0.931833	0.0581637
PDZ and LIM domain protein 3	A0A0A0MQY0;Q53GG5;A0A087WYF8	PDLIM3	1.49752	0.0589296
Myozenin-2	Q9NPC6	MYOZ2	-1.04375	0.0611267
4-aminobutyrate aminotransferase, mitochondrial	X5D8S1;H3BRN4;P80404;H3BNQ7;B7Z1V4	ABAT	1.16027	0.0612076
D-3-phosphoglycerate dehydrogenase	O43175;V9HW79;Q5SZU1;B3KSC3;Q9UMY2	PHGDH;HEL-S-113;PGDH3	0.754162	0.0613974
Acetyl-coenzyme A synthetase;Acetyl-coenzyme A synthetase, cytoplasmic	Q96FY7;Q4G0E8;Q68CU9;H0UIA1;Q6DKJ3;Q9NR19;B3KUV2;Q9H9U4	ACSS2;DKFZp762G026	0.807961	0.0626115
Septin-11	D6RGI3;D6RER5;Q9NVA2;D6RDU5;H0Y961	43354	0.81574	0.0627777
DNA-dependent protein kinase catalytic subunit	P78527	PRKDC	0.880919	0.0631284
Eukaryotic translation initiation factor 3 subunit I	Q5U0F4;Q53HU7;Q13347	EIF3I	1.53952	0.0631284
LIM domain only protein 7	E9PMT2;F8WD26;F8J2B5;J3KP06;Q8WWI1;A0A0A0MTE2;H0Y424	LMO7	0.552798	0.0634486
Flavin reductase (NADPH)	V9HWI1;P30043;M0R192;M0QZL1	HEL-S-10;BLVRB	0.555747	0.063475
Nuclear mitotic apparatus protein 1	A0A024R5M9;Q4LE64;Q14980;A0A087WY61;A0A024R5G4;Q59HB8;Q7Z757	NUMA1;NUMA1 variant protein	0.798366	0.063475
NA	A0A1B0GV45	NA	2.01923	0.06503
Puromycin-sensitive aminopeptidase	E9PLK3;P55786;B7Z899;B7Z4B2;B3KU93;B7Z1H4;B3KTP2;B7Z1V9	NPEPPS	0.42553	0.0652312
Collagen alpha-2(VI) chain	P12110	COL6A2	0.968737	0.0652312
26S protease regulatory subunit 6A	R4GNH3;A8K781;A0A140VK42;P17980;E9PM69;E9PKD5;E9PN50	PSMC3	0.642689	0.0652516
39S ribosomal protein L18, mitochondrial	A8K9D2;Q9H0U6	MRPL18	0.599218	0.0657966
Nestin	D3DVC4;P48681	NES	0.750793	0.0657966
Agrin;Agrin N-terminal 110 kDa subunit;Agrin C-terminal 110 kDa subunit;Agrin C-terminal 90 kDa fragment;Agrin C-terminal 22 kDa fragment	A0A087X208;O00468	AGRN	0.75701	0.0657966
Mimecan	Q7Z532;A8K0R3;B4DI63;P20774;Q5TBF5	OGN	3.07697	0.0657966
Tubulin beta-2B chain	Q9BVA1	TUBB2B	0.48285	0.0659026
6-phosphogluconate dehydrogenase, decarboxylating	P52209;B4E2U0;B4DL86;K7EM49;A9Z1X1;B4DV68	PGD	0.504714	0.0659026
Hsc70-interacting protein;Putative protein FAM10A5;Putative protein FAM10A4	B4E0U6;A0A140VKA6;P50502;Q1XBU6;B7ZA40;Q0IJ56;H7C3I1;Q8NFI4;Q3KNR6;Q8IZP2;F6VDH7	ST13;ST13P5;ST13P4	0.759266	0.0659026
60S ribosomal protein L18	Q0QEW2;H0YHA7;A0A024QZD1;J3QQ67;Q07020;G3V203;F8VUA6;F8VYV2;B4DDY5;A0A075B7A0	RPL18	0.436521	0.0661715
40S ribosomal protein S27	P42677;Q5T4L4	RPS27	0.516911	0.0665954
Kinase D-interacting substrate of 220 kDa	Q9ULH0;E9PH70;H0Y8E4;B4DGY1;B4DK94;Q7Z322	KIDINS220;DKFZp686H14204	1.20534	0.0676701
Large proline-rich protein BAG6	A0A024RCR6;A0A0G2JK23;P46379;A0A0G2JL47	BAT3;BAG6	1.36536	0.0679058
Myosin regulatory light polypeptide 9	Q6IBG1;P24844	MYL9	0.935004	0.0679213
Nuclear pore complex protein Nup155	E9PF10;B4DLT2;A0A024R071;O75694	NUP155	1.1352	0.0679574
Translocon-associated protein subunit gamma	C9JA28;Q9UNL2	SSR3	1.38101	0.0679574
Oligoribonuclease, mitochondrial	H0YGR4;F5GYG5;Q9Y3B8;H0YG54	REXO2	-1.36771	0.0685268
Epimerase family protein SDR39U1	Q9NRG7;G3V4N6;G3V5T1;G3V4Z0;Q86TZ5;F6RWC2	SDR39U1	0.627585	0.0698214
T-complex protein 1 subunit beta	V9HW96;P78371;F5GWF6;F8VQ14	HEL-S-100n;CCT2	0.501199	0.0699091
NA	K7EL81;B4DLW4	PPP1R12C	-1.41624	0.0715557
Clustered mitochondria protein homolog	I3L2B0;K7EIG1;O75153	CLUH	-0.782614	0.0715557
60S ribosomal protein L22	Q7Z4W8;P35268;K7EP65;K7EKS7;K7ELC4;K7EMH1;K7ERI7;K7EJT5	RPL22	0.882545	0.0715557
Keratin, type II cytoskeletal 1	H6VRG3;H6VRG0;H6VRF8;H6VRG1;P04264;H6VRF9;CON__P04264	KRT1	0.969212	0.0715557
3-hydroxyacyl-CoA dehydrogenase type-2	A0A0S2Z410;Q99714;Q5H928;A0A0S2Z434	HSD17B10	0.59825	0.0728635
Myosin regulatory light chain 12A;Myosin regulatory light chain 12B	J3QRS3;P19105;O14950;Q53HL1;Q2F834	MYL12A;MYL12B	0.6515	0.0732293
COP9 signalosome complex subunit 4	Q53FV3;B3KM48;A0A0S2Z5H7;Q9BT78;D6RFN0;D6RAX7;D6RD63	COPS4	0.839482	0.0732293
Myosin-4	Q9Y623	MYH4	1.2053	0.0732293
High mobility group protein B2	Q5U071;P26583;D6R9A6	HMGB2	0.597872	0.0753016
Actin-related protein 2/3 complex subunit 1A	V9HVZ6;Q92747;Q53GB6;A0A0K0K1L3;Q59GQ0;E9PF58;Q75MY0	HEL-68;ARPC1A	0.675437	0.0760034
Succinate dehydrogenase [ubiquinone] flavoprotein subunit, mitochondrial	A0A024QZ30;P31040;D6RFM5;B3KT34;A0A087X1I3;Q0QF12;B4DYN5	SDHA	-0.705212	0.0765049
[Pyruvate dehydrogenase (acetyl-transferring)] kinase isozyme 1, mitochondrial	Q15118;Q53R49;B7Z7N6;B7Z207;C9IYB4	PDK1	0.806549	0.0767903
Rab GDP dissociation inhibitor beta	Q6IAT1;B4DLV7;P50395	GDI2	0.521521	0.0770127
Carnitine O-palmitoyltransferase 1, muscle isoform	A8K5K1;A5PLL0;A0A024R4W7;Q92523;Q53FV7;A2RRE8	CPT1B;hCG_2044796	-1.9415	0.0772529
Serine hydroxymethyltransferase;Serine hydroxymethyltransferase, mitochondrial	V9HW06;Q53ET4;P34897;A0A024RB99;Q5HYG8;B4DW25;B4E1G2;B4DJQ3;B4DP88;Q5BJF5;B4DJ63;B4DWA7;B4DLV4;H0YIZ0	HEL-S-51e;SHMT2;DKFZp686P09201	0.494727	0.0772621
Vacuolar protein sorting-associated protein 28 homolog	Q548N1;Q9UK41;A0A0S2Z5H5;E9PQR7;E9PM90	VPS28	0.893928	0.0772621
28S ribosomal protein S31, mitochondrial	Q92665	MRPS31	0.967323	0.0772621
Myosin-9	A0A024R1N1;P35579;Q86XU5	MYH9	0.505585	0.0779225
SURP and G-patch domain-containing protein 2	A8K5G0;A0A024R7K0;M0R2Z9;Q8IX01;M0R3F6	SFRS14;SUGP2	1.03659	0.0788053
Pyruvate dehydrogenase protein X component, mitochondrial	O00330;B2R673	PDHX	-0.437132	0.0788288
Myosin regulatory light chain 2, atrial isoform	Q01449;H7C243	MYL7	1.02835	0.0789794
Phosphomevalonate kinase	Q6FGV9;Q15126	PMVK	1.21154	0.0789794
Delta-aminolevulinic acid dehydratase	B7Z3I9;A0A140VJL9;A0A024R877;Q6ZMU0;P13716;B7ZBK6	ALAD	-0.733467	0.0796966
Aspartate aminotransferase;Aspartate aminotransferase, mitochondrial	A0A024R6W0;P00505;B3KUZ8;A8K482	GOT2	-0.655838	0.0796966
Phosphoglycerate kinase;Phosphoglycerate kinase 1	V9HWF4;P00558;B4E1H9	HEL-S-68p;PGK1	0.332329	0.0796966
60S ribosomal protein L8	P62917;B4DVG7;E9PKZ0;G3V1A1;E9PKU4	RPL8	0.367378	0.0796966
Alanine--tRNA ligase, cytoplasmic	P49588	AARS	0.603743	0.0796966
NA	Q6FGX3;A0A024R5H8;Q53ET8	RAB6A	0.636228	0.0796966
Cell division control protein 42 homolog	A0A024RAE4;B4E1U9;P60953;A0A024R9T1;B7ZAY4;B4DMH5;Q5JYX0;Q9UJM1	CDC42;hCG_39634	0.65925	0.0796966
Nucleolar protein 56	O00567;A8K9K6;A0PJ92	NOP56	0.680059	0.0796966
Microtubule-associated protein RP/EB family member 1	B4DM33;Q15691;A2VCR0	MAPRE1	0.689658	0.0796966
Transmembrane emp24 domain-containing protein 2	B4DP27;Q6FHT8;Q15363;F5GX39;E7EQ72;B4E020	RNP24;TMED2	0.747477	0.0796966
Scaffold attachment factor B1	B7Z2Z1;B7ZLP5;A8K329;Q15424;B7Z1C7;B7Z2F6;B7Z5X3;B7Z959	SAFB	0.81139	0.0796966
Mitofusin-2	O95140;B7Z3H8	MFN2	0.821339	0.0796966
Metaxin-2	B7Z9F3;O75431;C9JNK6;B3KM74;C9JAZ1	MTX2	0.939618	0.0796966
Phosphatidylinositol 4-kinase alpha	B4DYG5;Q4LE69;P42356;D3DX33	PIK4CA variant protein;PI4KA;hCG_1999854	1.18028	0.0796966
Ubiquitin carboxyl-terminal hydrolase;Ubiquitin carboxyl-terminal hydrolase 7	Q6U8A4;Q93009;B7Z855;B7ZAX6;H3BND8;B7Z7T5	USP7	1.38065	0.0796966
ATP synthase F(0) complex subunit B1, mitochondrial	Q5QNZ2;Q08ET0;A8K4W2;P24539;Q53GB3	ATP5F1;hCG_39985	0.390865	0.0809825
Protein SET;Protein SETSIP	A0A0C4DFV9;B2RCX0;A0A024R895;Q5VXV3;Q01105;A0A087X027;P0DME0	SET;SETSIP	0.546468	0.0809825
Thiosulfate sulfurtransferase/rhodanese-like domain-containing protein 1	Q8NFU3;R4GNF9	TSTD1	0.804532	0.0809825
Peptidyl-prolyl cis-trans isomerase NIMA-interacting 1	Q13526;K7EN45;K7EMU7;B3KUM4	PIN1	-0.648098	0.0812565
Trimethyllysine dioxygenase, mitochondrial	Q9NVH6	TMLHE	0.566425	0.0812565
Tubulin beta-4B chain	Q8IZ29;P68371;Q8N6N5;Q8IWP6;B3KML9;Q96HX0	TUBB2C;TUBB4B	0.331653	0.0813516
Eukaryotic initiation factor 4A-I	A8K7F6;P60842;A8K088;J3KT12;Q59F68;J3KTB5;J3QS69;J3QL43;B4DNH2;J3QR64	EIF4A1	0.374429	0.0813516
Matrin-3	A0A0R4J2E8;A8MXP9;P43243;D6REM6;Q68D11;D6R991	MATR3;DKFZp686K23100	0.504018	0.0813516
Calpain-2 catalytic subunit	Q59EF6;B2RCM3;P17655;B4E1R7;B4DN77	CAPN2	0.70311	0.0830524
Myosin-3	P11055;Q5GJ67	MYH3	-0.959138	0.0831496
Protein disulfide-isomerase TMX3	Q3B7X1;Q96JJ7	TMX3	0.824082	0.0831496
THO complex subunit 4	Q86V81;E9PB61	ALYREF	0.676188	0.0839539
Syntaxin-binding protein 3	O00186	STXBP3	0.882019	0.0840808
Thrombospondin-1	P07996;A0A024R9Q1;CON__Q28194	THBS1	0.654268	0.0843664
Inter-alpha-trypsin inhibitor heavy chain H1	B7Z539;B7Z549;P19827;F8WAS2	ITIH1	1.74341	0.0845794
NADH dehydrogenase [ubiquinone] flavoprotein 1, mitochondrial	G3V0I5;E5KNH5;P49821;Q53G70;Q96ID4;B4DE93;B4DUN7	NDUFV1	-0.716388	0.0860719
Protein phosphatase 1 regulatory subunit 7	A0A140VK83;Q15435;C9J177;H7C003;C9JD73;B5MBZ8	PPP1R7	0.958384	0.087698
Elongation factor 1-alpha 2	Q05639;Q59GP5	EEF1A2	2.25089	0.0878598
Poly [ADP-ribose] polymerase 1	A0A024R3T8;P09874;B4E0E1;B2R5W3	PARP1	0.445353	0.0879396
Sideroflexin;Sideroflexin-3	A0A0A0MS41;B4DRS6;Q9BWM7;S4R3N9	SFXN3	1.09749	0.0879396
Sorcin	C9J0K6;P30626;B4DHQ6	SRI	0.543341	0.0880244
Bifunctional purine biosynthesis protein PURH;Phosphoribosylaminoimidazolecarboxamide formyltransferase;IMP cyclohydrolase	V9HWH7;P31939;B2R7P8	HEL-S-70p;ATIC	0.569198	0.0881194
Stomatin-like protein 2, mitochondrial	Q9UJZ1;A0A087WYB4;Q6ZNW0	STOML2	0.468159	0.0881585
DAZ-associated protein 1	K7EQ55;K7EK33;A0A0S2Z569;Q96EP5;K7EQ02;Q5IRN2	DAZAP1;DAZAP1/MEF2D fusion	1.03814	0.0881585
Elongation factor 1-beta	A0A024R3W7;P24534;A4D1M6	EEF1B2;LOC392793	0.567478	0.088902
Major vault protein	X5D2M8;Q14764;X5D7K9;B4DXN0;B4DDR2;B4DP93;X5DNU0;X5D7S8	MVP	0.744649	0.088902
COP9 signalosome complex subunit 3	Q9UNS2;H7C3P9;B4DN01	COPS3	1.06689	0.088902
Cytochrome c oxidase subunit NDUFA4	A0A024R9Z0;O00483	NDUFA4	0.524462	0.0893128
Vesicle-associated membrane protein-associated protein B/C	Q53XM7;O95292	VAPB	0.716922	0.0893128
GMP synthase [glutamine-hydrolyzing]	B4DUT7;A0A140VJK6;P49915;Q53F90	GMPS	1.00812	0.0893128
Glutathione S-transferase kappa 1	Q6FII1;Q9Y2Q3;Q2NLC8;E9PFN5;C9JNT3	LOC51064;GSTK1	1.58235	0.0893128
Calcium-binding mitochondrial carrier protein Aralar1	B3KMV8;O75746	SLC25A12	0.650448	0.0895483
Heat shock protein HSP 90-alpha	K9JA46;P07900;Q2VPJ6;Q8TBA7;Q86U12;O75322;Q96HX7	EL52;HSP90AA1	0.375563	0.0898939
Phosphatidylinositol-binding clathrin assembly protein	B5BU72;A0A024R5L7;A8K5U9;A0A024R5P1;Q13492;E9PI56;E9PKP6;E9PLJ8	PICALM	1.54015	0.0900863
Cadherin-2	A0A024RC42;P19022	CDH2	-0.793684	0.0906352
NA	A6N933;A6N931	MYH7	-1.34227	0.0907066
Sepiapterin reductase	P35270;B4DSF0	SPR	-1.25255	0.0920465
Mannose-6-phosphate isomerase	H3BPB8;P34949;H3BMZ9;Q8NHZ6;H3BPP3;H3BP57;H3BT48;H3BUZ9;B4DFC4;F5GX71;B4DW50;H3BPM5;H3BPU7;H3BU66;H3BQX0;H3BNY8;H3BT46	MPI	-0.954484	0.0925264
Adenosylhomocysteinase	P23526;Q1RMG2	AHCY	0.396263	0.0925264
Nuclear pore complex protein Nup205	Q92621;Q6P486;B4DE72	NUP205	0.900743	0.0925264
Pyridoxal kinase	V9HWC3;O00764;F2Z2Y4	HEL-S-1a;PDXK	0.809422	0.0935454
Annexin;Annexin A4	V9HW59;Q6LES2;P09525;Q6P452;B4DDZ4;B4DE02;Q59FK3	HEL-S-274;ANXA4	0.830608	0.0935454
Ragulator complex protein LAMTOR2	Q9Y2Q5	LAMTOR2	0.907555	0.0935454
RNA-binding protein 4;RNA-binding protein 4B	Q9BWF3;E9PB51;A8K9U0;Q9BQ04;D6R9K7;J3QRR5;E9PLB0;E9PM61;U3KQD5	RBM4;RBM4B	0.548825	0.0942509
28S ribosomal protein S7, mitochondrial	A0A024R8L0;J3QLS3;Q9Y2R9;J3QQS1;J3QKW2;J3KSI8	MRPS7	0.798524	0.0943835
Short/branched chain specific acyl-CoA dehydrogenase, mitochondrial	A0A0S2Z3P9;P45954	ACADSB	0.486741	0.0948562
Actin-related protein 3	A0A024RAI1;P61158;B4DXW1;Q59FV6;B4DT29;B4DTI0	ACTR3	0.552374	0.0948562
5-nucleotidase domain-containing protein 2	Q9H857	NT5DC2	0.745092	0.0948562
Ubiquinone biosynthesis protein COQ9, mitochondrial	A0A024R6U3;O75208;B4DIV2;H3BNT2;H3BPY0;H3BSJ5	hCG_2025883;COQ9	-1.09853	0.0961985
14-3-3 protein theta	P27348;B4DMT8;Q53S41;B4DY04;E9PG15	YWHAQ	0.707792	0.096713
LIM domain-binding protein 3	V5T7C5;O75112;B4DGP4;A0A0S2Z501	LDB3	-0.60676	0.096806
Peptidyl-prolyl cis-trans isomerase FKBP1A;Peptidyl-prolyl cis-trans isomerase	P62942;Q5W0X3;A0A087WZM5;Q0VDC6	FKBP1A	1.05569	0.096806
40S ribosomal protein S3	P23396;Q53G83;E9PL09;E9PPU1;H0YEU2;F2Z2S8;H0YCJ7;Q9NQS8;H0YF32	RPS3	0.383368	0.0982425
Heat shock 70 kDa protein 6;Putative heat shock 70 kDa protein 7	Q53FC7;B2R6X5;P17066;B3KSM6;P48741	HSPA6;HSPA7	0.847594	0.0985318
Clathrin heavy chain;Clathrin heavy chain 1	A0A087WVQ6;Q00610	CLTC	0.361379	0.0990767
Thioredoxin-like protein 1	V9HW51;B2R960;O43396;Q59G46;K7ER96	HEL-S-114;TXNL1	1.04329	0.10015
Mitogen-activated protein kinase kinase kinase MLT	D4Q8H0;A8K710;B4DQ47;Q9NYL2	pk;ZAK	-1.30833	0.101309
Fructose-bisphosphate aldolase;Fructose-bisphosphate aldolase A	V9HWN7;P04075;J3KPS3;H3BQN4;H3BPS8;H3BUH7;A0A0M4FNU3;H3BR04;H3BMQ8	HEL-S-87p;ALDOA	0.553362	0.10173
EH domain-containing protein 4	A8K9B9;A0A024R9N6;Q9H223	EHD4	0.629643	0.102512
39S ribosomal protein L40, mitochondrial	Q9NQ50	MRPL40	0.635564	0.103897
NADH dehydrogenase [ubiquinone] 1 beta subcomplex subunit 10	A8K761;O96000;H3BPJ9;H3BV16	NDUFB10	0.44377	0.104074
KH domain-containing, RNA-binding, signal transduction-associated protein 1	B4DDX2;Q07666;B4E043;B2R7B5	KHDRBS1	0.668072	0.104802
28S ribosomal protein S15, mitochondrial	P82914;D3DPS9;B4DYW3;Q59EA6	MRPS15	0.633649	0.104995
Homer protein homolog 1	Q53F18;Q86YM7;Q5U5K4;Q86YM6	HOMER1	1.24834	0.105117
Sodium/potassium-transporting ATPase subunit alpha-3	M0R116;Q53ES0;B7Z9V4;A0A0A0MT26;P13637;B7Z1Q9;B7Z3F8;B3KV59;B3KSY7	ATP1A3	-1.00885	0.105203
Heat shock 70 kDa protein 1B;Heat shock 70 kDa protein 1A	A8K5I0;A0A0G2JIW1;P0DMV9;P0DMV8;B4DNT8;B4DWK5;Q59EJ3;B4DFN9;B4DI39;B4E1S9;B4E388;B4DVU9;V9GZ37;B3KTT5;B4DNX1;B4E1T6	HEL-S-103;HSPA1B;HSPA1A	0.459909	0.105203
26S proteasome non-ATPase regulatory subunit 10	B1AJY7;O75832;B1AJY5	PSMD10	0.741632	0.105203
RNA-binding protein 14	A0A0S2Z4Z0;Q96PK6;Q59GV2	RBM14	0.947149	0.105203
Delta-sarcoglycan	Q92629	SGCD	2.10484	0.105203
Erlin-2	O94905;E5RHW4;E5RJ09	ERLIN2	0.663952	0.105703
Aminoacyl tRNA synthase complex-interacting multifunctional protein 2	B2R7M3;A0A024QZY1;Q13155;A8MU58;F8W950	JTV1;AIMP2	0.762799	0.105703
Desmin	Q53SB5;A5Z217;P17661;Q45VM8;Q45VM7;Q45VM6;Q9H319;L7RDA5;B4DUI0	tmp_locus_29;DES	-0.552466	0.105987
PDZ and LIM domain protein 5	A0A024RDE8;Q96HC4;H0Y8Y3;Q4W5K9	PDLIM5;LIM	-0.69254	0.106087
Enoyl-CoA delta isomerase 1, mitochondrial	P42126;Q96DC0;H3BS70	ECI1;DCI	0.585365	0.106087
Far upstream element-binding protein 1	B4E0X8;E9PEB5;Q96AE4;B4DWL1;B4DT31;Q6PJY1;Q59FU3	FUBP1	0.721242	0.106087
Glyoxylate reductase/hydroxypyruvate reductase	Q9UBQ7;Q5M7Z5;U3KQ56	GRHPR	0.459644	0.106265
Probable 2-oxoglutarate dehydrogenase E1 component DHKTD1, mitochondrial	Q96HY7	DHTKD1	-1.1	0.107174
NA	D3DSM4;D3DSM5;Q8NG19;H7C457	COL18A1	0.712161	0.107174
Leucine-rich repeat flightless-interacting protein 2	A0A024R2K4;Q9Y608	LRRFIP2	1.06516	0.107174
Carbamoyl-phosphate synthase [ammonia], mitochondrial	Q5R210;Q5R208;Q5R206;A8K134;A0A024R454;P31327;Q5R209;Q5R207	CPS1	1.09541	0.107753
Protein SCO1 homolog, mitochondrial	J3QL56;O75880	SCO1	-1.12475	0.108249
Calnexin	P27824	CANX	0.410461	0.108249
Cofilin-2	Q549N0;Q9Y281	CFL2	-0.537908	0.108589
Prolyl endopeptidase	P48147	PREP	0.633229	0.108589
NA	Q96DP0	NA	0.782287	0.108589
Ig alpha-1 chain C region	Q6MZW0;Q9UP60;Q8NCL6;Q96K68;Q6N090;P01876;Q8WY24	DKFZp686J11235;SNC73;DKFZp686G21220;IGHA1	2.86251	0.109399
40S ribosomal protein S24	E7ETK0;A0A087WUS0;P62847	RPS24	0.678598	0.109676
Ubiquitin carboxyl-terminal hydrolase 28;Ubiquitin carboxyl-terminal hydrolase	Q96RU2;B4E3L3;G3V1N5	USP28	0.947936	0.109676
Collagen alpha-1(III) chain	P02461	COL3A1	0.999294	0.109676
Transforming growth factor-beta-induced protein ig-h3	A0A0S2Z4Q2;Q15582;Q53GU8;A0A0S2Z4K6;H0Y8L3	TGFBI	1.17719	0.109676
T-complex protein 1 subunit zeta	B2R9K8;A0A024RDL1;P40227;Q59ET3;A1JUI8;B4DPJ8;B4DN39	CCT6A	0.332215	0.110147
Core histone macro-H2A;Core histone macro-H2A.2;Histone H2A	A0A024QZP6;Q9P0M6;Q9HA11;Q5SQT3	H2AFY2	0.444018	0.110163
Probable ATP-dependent RNA helicase DDX17	H3BLZ8;Q59F66;Q92841	DDX17	0.5037	0.110163
Protein DEK	P35659;B4DNW3;B4DFG0;D6RDA2	DEK	0.71374	0.110163
Cytochrome b-c1 complex subunit 8	O14949;B7Z4A1	UQCRQ	0.743172	0.110928
Small nuclear ribonucleoprotein Sm D2	P62316;K7ERG4	SNRPD2	0.536378	0.111642
Inactive tyrosine-protein kinase 7	Q13308;Q59FV9	PTK7	0.777784	0.111642
NA	G1UI22;A8MQ02	MLLT4	0.830978	0.111642
28S ribosomal protein S27, mitochondrial	G5EA06;B4DT94;A0A024RAJ1;Q92552;D6RH20;Q6PKB3;B4DKI9;Q8N6F2	MRPS27	0.897846	0.111642
NA	Q6P5S8	IGK@	1.30246	0.111642
Glycogen phosphorylase, muscle form;Alpha-1,4 glucan phosphorylase	A0A0M4FEM1;P11217;B4DRW6;B2RB32;B4DRQ4	PYGM	-0.463956	0.112198
Calumenin	Q6IAW5;O43852;B3KQF5	CALU	0.61771	0.112247
Lactoylglutathione lyase	X5DNM4;V9HW62;Q04760	GLO1;HEL-S-74	0.500146	0.112283
Perilipin;Perilipin-2	B4DJK9;Q6FHZ7;Q99541;B4DNH6	ADFP;PLIN2	1.27149	0.112283
DNA topoisomerase 2-beta;DNA topoisomerase 2	Q02880;Q71UH4;B4DKD0;E9PCY5;Q59H80	TOP2B	0.670115	0.112479
Apolipoprotein O	H7C1U8;Q9BUR5;G3V1B6	APOO	0.723175	0.112479
Protein AMBP;Alpha-1-microglobulin;Inter-alpha-trypsin inhibitor light chain;Trypstatin	B7Z8R6;P02760;S4R3Y4;S4R471	AMBP	2.05193	0.112737
Electron transfer flavoprotein subunit beta	P38117;M0QY67	ETFB	-0.553819	0.11279
ER membrane protein complex subunit 2	Q53HG5;A8K4K9;Q15006	EMC2	1.00688	0.11279
Keratin, type II cytoskeletal 8	CON__P05787;P05787;Q969I0;F8VUG2;Q7L4M3	KRT8	0.46219	0.113553
Heterogeneous nuclear ribonucleoprotein R	O43390;Q0VGD6;B4DMB1;B2R7W4;B4DT28	HNRNPR;HNRPR	0.398637	0.113907
Calmegin	A8K454;A0A140VKG2;O14967;D6RAZ4;B4DRG2	CLGN	0.569734	0.113907
ERO1-like protein alpha	Q96HE7	ERO1L	0.773858	0.116948
DNA repair protein RAD50	Q92878	RAD50	0.900052	0.117492
Poly(U)-binding-splicing factor PUF60	A0A0J9YYL3;A0A0J9YVP6;A0A0J9YXJ8;A0A0J9YXX5;Q9UHX1;A0A0J9YVR6;E9PQ56;A0A0J9YWM1;H0YEM1	PUF60	-1.01587	0.120172
Interferon-induced transmembrane protein 1;Interferon-induced transmembrane protein 2;Interferon-induced transmembrane protein 3	H7BYV1;E9PS44;E9PQN9;A0A024R210;Q6IBB0;H9NL19;H9NL12;H9NKY4;P13164;Q01629;Q01628	IFITM2;IFITM3;IFITM1	0.421929	0.120172
Laminin subunit alpha-5	O15230	LAMA5	0.536991	0.120172
Cytochrome c oxidase subunit 7A2, mitochondrial	Q496I0;D6RIE3;D6RGV5;H0UI06;P14406	COX7A2	0.644457	0.120172
Signal recognition particle 9 kDa protein	P49458	SRP9	0.650767	0.120172
39S ribosomal protein L49, mitochondrial	A0A024R578;Q13405;H0YDP7;Q59GE9	MRPL49	0.687754	0.120172
Disks large homolog 1	A0A0C4DFT3;Q12959;Q59FC4;B4DF78;E7EQD7	DLG1	0.853013	0.120172
Malate dehydrogenase;Malate dehydrogenase, mitochondrial	Q75MT9;Q6FHZ0;A0A024R4K3;P40926;Q0QF37;G3XAL0;B3KTM1	MDH2	0.359371	0.120676
Gamma-adducin	Q5VU08;Q9UEY8;Q59EK1;Q53FL4	ADD3	0.531928	0.120676
Proteasome activator complex subunit 2	Q86SZ7;Q2TNB3;A0A087X1Z3;Q9UL46;H0YM70;Q6FHK9	PSME2	0.606898	0.120676
Cytoplasmic FMR1-interacting protein 2	E7EVJ5;B7Z4I3;B7Z8N7;Q96F07;H7C229;E7EW33;B7Z217;B7Z3H2;Q9NSN1	CYFIP2;DKFZp761H087	0.806742	0.120676
40S ribosomal protein S13	P62277;J3KMX5	RPS13	0.489334	0.123095
Superkiller viralicidic activity 2-like 2	P42285;B4E3M6;A8K6I4	SKIV2L2	0.856125	0.123095
Serine/arginine-rich splicing factor 10	Q5JRI1;Q53GD7;A0A0S2Z504;O75494	SRSF10	0.779294	0.12369
Synaptic vesicle membrane protein VAT-1 homolog	A0A024R1Z6;Q99536;B3KUF8	VAT1	0.619555	0.125756
Profilin-1	P07737;K7EJ44	PFN1	0.364381	0.126678
NHL repeat-containing protein 2	Q8NBF2	NHLRC2	0.712169	0.126678
26S proteasome non-ATPase regulatory subunit 7	B2RD27;P51665;B4DXI8;H3BNT7;H3BTM8	PSMD7	0.886708	0.126678
Heterogeneous nuclear ribonucleoprotein U	B3KX72;Q00839;Q96BA7;B4DLR3;Q7Z4Q5	HNRNPU;HNRPU	0.59231	0.127189
E3 SUMO-protein ligase RanBP2	P49792	RANBP2	1.19606	0.127189
40S ribosomal protein S17	P08708;H0YN88;A0A075B716;H0YN73	RPS17	-0.796496	0.129882
ADP/ATP translocase 2;ADP/ATP translocase 2, N-terminally processed	P05141;Q6NVC0	SLC25A5	0.342422	0.130527
Basigin	B4DY23;Q54A51;P35613;B4DNE1;A0A087X2B5;I3L192;A0A087WUV8	hEMMPRIN;BSG	0.684416	0.130527
Prolargin	Q6FHG6;P51888;Q7Z4B2	PRELP;MST161	1.68518	0.131294
Argininosuccinate synthase	Q5T6L4;P00966;A8KAP9;B4E395	ASS;ASS1	0.775176	0.131932
NA	Q6IPH7	RPL14	0.482645	0.132137
Microtubule-associated protein;Microtubule-associated protein 4	E7EVA0;P27816	MAP4	-0.470439	0.13285
Ras-related protein Rab-5A	A0A024R2K1;P20339;A0A0A1HAN9	RAB5A	0.679009	0.132935
NA	V9HVZ7	HEL-176	1.30753	0.134431
Thymidylate kinase	Q6FGU2;P23919;Q53F55;G5E9E9;H7C312;H7C3A4;H7BZ20	DTYMK	0.648946	0.134684
Mitochondrial import receptor subunit TOM22 homolog	Q549C5;Q9NS69;Q53GB0	MST065;TOMM22	0.713652	0.134684
Annexin A6;Annexin	A0A0S2Z2Z6;P08133;A8K3Q7;B7Z582;Q6ZP35;E7EMC6	ANXA6	0.295755	0.134794
Propionyl-CoA carboxylase alpha chain, mitochondrial	P05165;B2RDE0;A0A1B0GU58;A0A1B0GWI4;A0A1B0GUX9;A0A1B0GWA1	PCCA	0.404126	0.135894
Histidine--tRNA ligase, cytoplasmic	P12081;B4DDD8;B3KWE1;Q52NV4;B4E1C5;E7ETE2;B4DEA2	HARS;HRS	0.550226	0.13634
Host cell factor 1;HCF N-terminal chain 1;HCF N-terminal chain 2;HCF N-terminal chain 3;HCF N-terminal chain 4;HCF N-terminal chain 5;HCF N-terminal chain 6;HCF C-terminal chain 1;HCF C-terminal chain 2;HCF C-terminal chain 3;HCF C-terminal chain 4;HCF C-terminal chain 5;HCF C-terminal chain 6	P51610;A6NEM2	HCFC1	1.43721	0.13712
Structural maintenance of chromosomes protein;Structural maintenance of chromosomes protein 3	Q86VX4;Q9UQE7;B0AZQ4	SMC3	0.673301	0.137233
60S ribosomal protein L11	Q5VVD0;P62913;Q08ES8;Q5VVC8;Q5VVC9	RPL11	-0.95321	0.141822
60S ribosomal protein L9	D6RAN4;Q53Z07;P32969;H0Y9V9;B4E1M5;E7ESE0;B4DLV8	RPL9	0.645157	0.142234
Heterogeneous nuclear ribonucleoprotein K	B4DUQ1;A0A024R228;Q6IBN1;P61978;B4DFF1;Q5T6W2	HNRPK;HNRNPK	0.786921	0.142538
2-oxoglutarate dehydrogenase, mitochondrial	Q02218;A0A0D9SFS3	OGDH	-0.598085	0.142944
T-complex protein 1 subunit theta	P50990;Q53HU0;Q7Z759	CCT8	0.360481	0.144497
Microtubule-associated tumor suppressor 1	B4E246;Q9ULD2	MTUS1	1.00445	0.146046
Serine/arginine-rich splicing factor 7	A0A0B4J1Z1;B4DEK2;C9JAB2;Q16629;Q8NB80	SRSF7	0.885452	0.147379
Beta-2-microglobulin;Ig lambda-3 chain C regions;Ig lambda-2 chain C regions	Q8N355;Q8N5F4;Q6GMV8;Q6GMW3;Q6PJG0;A2NUT2;Q6PIQ7;Q6IPQ0;Q6GMX4;Q8TCJ5;A0A075B6L0;A0A075B6K9;Q6PJR7;S6C4S2;Q6NS95;Q7Z2U7;Q6IN99;Q567P1;A0A5E4;Q6GMX3;P0CG06;P0CG05	IGL@;DKFZp667J0810;IGLC3;IGLC2	2.4285	0.148142
Cysteine and glycine-rich protein 3	A2TDB8;P50461	CSRP3	-0.478517	0.14828
Tripeptidyl-peptidase 2	Q5VZU9;P29144;B7Z920	TPP2	0.853297	0.150681
Peroxiredoxin-4	V9HW63;Q13162;H7C3T4	HEL-S-97n;PRDX4	0.404619	0.151373
Heterogeneous nuclear ribonucleoprotein A1;Heterogeneous nuclear ribonucleoprotein A1, N-terminally processed;Heterogeneous nuclear ribonucleoprotein A1-like 2	F8W6I7;A0A024RB53;A0A024RAZ7;P09651;A0A024RC46;Q6IPF2;Q9BSM5;Q0VAC0;F8VZ49;A0A024QZ98;Q32P51;F8VTQ5;B4DP35;B4E0B5	HNRNPA1;HNRPA1;hCG_2020860;RP11-78J21.1;HNRNPA1L2	0.435667	0.151373
Emerin	P50402;Q5HY57	EMD	0.680713	0.151373
Eukaryotic translation initiation factor 2 subunit 3;Putative eukaryotic translation initiation factor 2 subunit 3-like protein	P41091;Q2VIR3;F8W810	EIF2S3;EIF2S3L	0.565384	0.15185
Eukaryotic translation initiation factor 6	P56537	EIF6	1.13617	0.15185
ADP-ribosylation factor-like protein 8A	B2R7U5;A0A024R977;Q96BM9	ARL8A	0.792848	0.152191
NA	A0A090N8G0	GARS	0.619463	0.153402
Nicotinate phosphoribosyltransferase	Q6XQN6;G5E977;C9J8U2	NAPRT	0.625669	0.153402
Thioredoxin domain-containing protein 5	A0A024QZV0;Q86UY0;Q6EHZ3;Q658S9;Q8NBS9	hCG_1811539;TXNDC5;STRF8;DKFZp666I134	1.23229	0.153659
V-type proton ATPase subunit B, brain isoform	A0A140VK65;P21281;Q59HF3;H0YC04	ATP6V1B2	0.655853	0.154047
Serine/threonine-protein kinase Nek9	A0A024R6D1;Q8TD19	NEK9	0.651335	0.15469
Tubulin beta chain	Q5JP53;Q5SU16;P07437;B7ZAF0;Q6LC01;B4DY90;Q5ST81;B7ZAK1;Q9BUU9;B4E052;B4DMU8;Q96B85;B4DXZ5;Q1KSF8	TUBB;XTP3TPATP1	0.426444	0.155377
Aspartyl aminopeptidase	A0A024R442;Q53SB6;E7ETB3;B7Z7F0;Q9ULA0;Q9BSS9;E7EMB6;A0A024R443;Q9NV55;Q9HAC6;B9ZVU2;F8WAN0;B7Z822;E7EPX3;C9JBE1	DNPEP	0.616097	0.155377
39S ribosomal protein L1, mitochondrial	A0PJ79;Q9BYD6;H0Y8N7	MRPL1	0.696297	0.155377
SUN domain-containing protein 1	E9PHI4;A0A146IHP0;A4D2Q0;O94901;A7MCZ7;H0Y6N5;H0Y742;B4E278;H7C2K3	SUN1;UNC84A	0.604705	0.155478
Coiled-coil domain-containing protein 141	Q6ZP82;E7ERF0;B8ZZB3;C9JR62	CCDC141	0.530063	0.156778
TRIO and F-actin-binding protein	Q9H2D6	TRIOBP	0.803462	0.156898
Eukaryotic translation initiation factor 3 subunit C;Eukaryotic translation initiation factor 3 subunit C-like protein	B4DVQ5;A1KYQ7;A0A024QYU9;Q99613;B5ME19;B4DVU3;B4DDN4;B4DRU0;B4E2Z6;A0A024QYX7;B3KNZ4	EIF3C;EIF3CL	0.961176	0.156898
Exportin-7	A8K607;Q9UIA9;E7ESC6;D3DSQ7;B4DSP8	XPO7	1.08139	0.157256
ATP-dependent 6-phosphofructokinase, platelet type	Q01813;Q8WTZ9	PFKP	0.372821	0.157602
26S proteasome non-ATPase regulatory subunit 13	A0A024R201;Q9Y6E3;Q9UNM6;Q53GN6;B2RBM7;A0A087WUL9;B4DJ66;J3KNQ3;E9PL38;H0YD73	PSMD13	0.572096	0.157602
OCIA domain-containing protein 1	A0A024R9U3;Q9NX40;D6RG39;D6RIT9;D6RDK6;D6RBN5	OCIAD1	0.7436	0.157654
Voltage-dependent anion-selective channel protein 2	A0A024QZT0;P45880;A0A0A0MR02;A0A024QZN9;B4DKM5;Q5JSD1	VDAC2	0.348633	0.158224
Dynactin subunit 1	E7EX90;Q14203;Q6MZZ3;Q6AWB1;Q6AWB3	DCTN1;DKFZp686I0746;DKFZp686E0752;DKFZp686E191	0.584247	0.158224
Endoplasmic reticulum resident protein 44	Q9BS26	ERP44	0.588161	0.158224
Mitochondrial chaperone BCS1	Q53EX1;A8JZZ8;A0A024R467;Q9Y276;H7C492	BCS1L	0.772185	0.158377
Myosin-1	V9HWC1;P12882	HEL71;MYH1	-1.29179	0.159055
Aconitate hydratase, mitochondrial	A0A0K0K1H7;A2A274;Q99798;B4DZ08;B2RBW5;B4DJW1;B4DW08	ACO2	-0.338558	0.159055
Protein NipSnap homolog 3A	Q9UFN0;B4DW81	NIPSNAP3A	0.585744	0.159491
Growth factor receptor-bound protein 2	Q6ICN0;B0LPF3;P62993;B3KR50;J3KT38	GRB2	0.433185	0.16039
Cell adhesion molecule 1	A0A087X105;A0A087WZW4;A0A087X1W8;A0A0A0MTJ8;A0A087WZR6;X5D8W0;X5DQS5;X5DQR8;X5DNF2;X5D7A8;Q9BY67;A0A087X0T8;A0A4Z1	CADM1	0.772163	0.16089
Synaptojanin-2-binding protein	A0A024R670;A0A087WUM0;P57105	SYNJ2BP;SYNJ2BP-COX16	0.831628	0.16089
NA	B4DE59	NA	0.894146	0.16089
NA	B7Z992;B7Z2X4	NA	0.452573	0.161082
Voltage-dependent calcium channel subunit alpha-2/delta-1;Voltage-dependent calcium channel subunit alpha-2-1;Voltage-dependent calcium channel subunit delta-1	P54289;Q9UIU0;Q9UDQ3	CACNA2D1;WUGSC:H_DJ0560O14.1	0.44436	0.161213
F-actin-capping protein subunit beta	P47756;B2R7T8;B1AK87;B1AK88;B4DWA6;B1AK85	CAPZB	0.543332	0.161297
Cancer-related nucleoside-triphosphatase	Q5TDE9;Q9BSD7;Q5TDF0	C1orf57;NTPCR	0.68625	0.161297
Ubiquitin thioesterase OTUB1	F5GYN4;J3KR44;B4DPD5;Q96FW1;F5H6Q1;F5GYJ8;Q659F9	OTUB1;DKFZp564E242	0.701316	0.161297
Sorting nexin-6;Sorting nexin-6, N-terminally processed	A8K885;Q9UNH7;A0A0A0MRI2;B4DJS7;Q5QTQ6;G3V5X9	SNX6	0.703445	0.161297
TSC22 domain family protein 2	O75157	TSC22D2	1.12413	0.161297
Mitochondrial amidoxime reducing component 2	Q969Z3	43161	0.624627	0.161299
40S ribosomal protein S20	P60866;E5RJX2;E5RIP1	RPS20	0.345054	0.1613
Isovaleryl-CoA dehydrogenase, mitochondrial	A0A0S2Z422;A0A0A0MT83;P26440;A0A0S2Z4K7;H0YLC3;H7C4G6	IVD	0.373951	0.1613
Activator of 90 kDa heat shock protein ATPase homolog 1	O95433;H0YJG7;H0YJ63;G3V438	AHSA1	0.889735	0.162578
Interferon regulatory factor 2-binding protein-like	Q9H1B7	IRF2BPL	-1.14098	0.163611
NA	Q53H01;A8K0B6;D3DSQ1;B3KUZ6	ASAH1	-0.363966	0.163611
GTP-binding nuclear protein Ran	B5MDF5;P62826;J3KQE5;F5H018;H0YFC6	RAN	0.446562	0.163611
NEDD8-activating enzyme E1 regulatory subunit	Q13564	NAE1	0.620207	0.163611
AP-3 complex subunit beta-1;AP-3 complex subunit beta	A0A0S2Z5J4;O00203;A8K586;Q3MNE1;A0A0S2Z4Z4;B4E0B2	AP3B1	0.625714	0.163611
Ubiquitin-like modifier-activating enzyme 6	A0A024RDB0;A0AVT1;B3KSS1	UBE1L2;UBA6	0.929316	0.163611
Sarcoplasmic reticulum histidine-rich calcium-binding protein	M0QZ43;Q2M1I0;B5TMG5;P23327	HRC	-0.730462	0.165175
Succinyl-CoA ligase [ADP/GDP-forming] subunit alpha, mitochondrial	Q6IAL5;A8K4W7;P53597;B2R8A1;B7Z438	SUCLG1	-0.488286	0.165175
Nicotinate-nucleotide pyrophosphorylase [carboxylating]	V9HWJ5;Q15274;C9JCJ5	HEL-S-90n;QPRT	0.710239	0.165175
LIM and SH3 domain protein 1	A0A024R1S8;Q14847;C9J9W2;A8K1D2;B4DIC4;B4DJI4	LASP1	0.865446	0.165175
EH domain-containing protein 2	B4DLA1;A0A024R0S6;Q9NZN4;B3KUH4;Q8NCJ3	EHD2	-1.84737	0.16615
Enoyl-CoA hydratase, mitochondrial	P30084	ECHS1	-0.430421	0.166289
Coatomer subunit gamma-1	Q9Y678;Q8WUI6;B3KW21	COPG1;COPG	0.707169	0.166824
Pogo transposable element with ZNF domain	Q7Z3K3;B4DSK8	POGZ	0.660636	0.16768
Heterogeneous nuclear ribonucleoprotein L	Q6NTA2;P14866;B2R959;M0QXS5	HNRNPL	0.425785	0.168359
Acetyltransferase component of pyruvate dehydrogenase complex;Dihydrolipoyllysine-residue acetyltransferase component of pyruvate dehydrogenase complex, mitochondrial	Q86YI5;A0A024R3D8;P10515;B4DJX1;H0YDD4;E9PEJ4;B4DS43;B4DLQ2	DLAT	-0.37276	0.168473
Guanine nucleotide-binding protein subunit alpha-11	Q59FM5;P29992;K7EL62	GNA11	0.732996	0.168659
NA	NA	NA	0.583801	0.168824
RNA-binding protein 12	Q69YJ7;Q9NTZ6;B4DRP9;B3KQH4	DKFZp667H197;RBM12	0.832154	0.168824
NA	CON__P02754	NA	-1.35833	0.16959
Complement component 1 Q subcomponent-binding protein, mitochondrial	Q07021;A8K651;I3L3Q7;I3L3B0	C1QBP	0.341803	0.16959
Polyadenylate-binding protein;Polyadenylate-binding protein 1;Polyadenylate-binding protein 3	A0A024R9C1;P11940;A0A087WTT1;E7EQV3;B4DZW4;E7ERJ7;B4DQX0;B3KT93;A0A024R9E2;H0YAR2;Q5VX58;Q3ZCS4;Q9H361	PABPC1;PABPC3	0.48772	0.16959
Collagen alpha-1(IV) chain;Arresten	A9LSU1;Q59F15;P02462	COL4A1	0.512661	0.16959
Heterogeneous nuclear ribonucleoprotein H3	Q53F48;A0A024QZK8;P31942;B4DHY1;A0A024QZP1	HNRPH3;HNRNPH3	0.705073	0.16959
Eukaryotic translation initiation factor 5	A0A024R6Q1;P55010;Q6IBU0	EIF5	0.772595	0.16959
Reticulon-4	Q9NQC3;Q53RF4	RTN4	1.1355	0.16959
Sodium/potassium-transporting ATPase subunit alpha-2	B3KRI1;B1AKY9;B2RAQ4;A0A0S2Z3W6;P50993;B3KX35;H0Y7C1;B4DIQ8	ATP1A2	-0.524002	0.170213
Myocardial zonula adherens protein	A0A024R5W4;P0CAP1;H8Y6P7	hCG_40688;MYZAP;GCOM1	0.889472	0.170346
Methylmalonate-semialdehyde dehydrogenase [acylating], mitochondrial	A0A024R6G4;Q02252;Q53H94;Q53FN8;G3V4Z4	ALDH6A1	0.293971	0.170885
Desmoplakin	P15924;Q4LE79	DSP;DSP variant protein	-0.333058	0.171165
Translocation protein SEC62	F8WF48;A0JLN5;R9WWI7;Q99442;F8WCJ7;Q3KR08;D3DNQ1	SEC62;TLOC1	0.738425	0.171165
Proteasome subunit alpha type-1;Proteasome subunit alpha type	P25786;V9HW55;F5GX11;B4E0X6;B4DEV8	PSMA1;HEL-S-275	0.583385	0.171457
Prostaglandin reductase 2	V9HW32;Q8N8N7;G3V3Y1	HEL-S-298;PTGR2	1.37276	0.171457
Cathepsin Z	Q5U000;Q9UBR2	CTSZ	0.472341	0.171815
Caveolin;Caveolin-1	Q2TNI1;Q03135;Q59E85;E9PCT5	CAV1	0.325542	0.17183
RNA binding protein fox-1 homolog;RNA binding protein fox-1 homolog 2;RNA binding protein fox-1 homolog 1;RNA binding protein fox-1 homolog 3	B0QYV1;A0A0G2JRA5;O43251;S4R469;Q8TCM0;F8VR27;F8VZY7;Q59HD3;X5DP44;B7ZLH9;B0QYY4;A0A087X2B1;F8WSN4;X5D7T5;J3KNW3;X5DNY3;B7Z1U7;F8VZG9;Q9NWB1;I3L1D4;A0A0G2JRD1;S4R3K7;A0A0G2JSB3;B0QYY7;J3QRF4;F8VRS4;A6NFN3	RBFOX2;DKFZp547L059;RBFOX1;A2BP1;RBFOX3	0.636156	0.17263
NA	B7ZA42	NA	0.365546	0.17274
Dihydropyrimidinase-related protein 5	Q53SW3;Q9BPU6	DPYSL5	0.62718	0.173063
26S proteasome non-ATPase regulatory subunit 8	K7EJR3;Q5U0B3;R4GMR5;V9HW09;P48556;K7EJC1;B4E2Y4	PSMD8;HEL-S-91n	0.508407	0.173242
EH domain-containing protein 3	Q9NZN3	EHD3	0.556464	0.175324
Splicing factor 3A subunit 1	A0A024R1K8;Q15459;B4E091	SF3A1	0.990955	0.175324
ATP synthase mitochondrial F1 complex assembly factor 2	Q8N5M1;C9J2Q2	ATPAF2	0.761134	0.176263
Actin-related protein 2/3 complex subunit 4	F8WCF6;P59998;F8WDD7;Q9H7Z5	ARPC4-TTLL3;ARPC4	0.601446	0.176854
Alpha/beta hydrolase domain-containing protein 11	Q8NFV4;D3DXF2	ABHD11	0.649602	0.178662
Peptidyl-prolyl cis-trans isomerase;Peptidyl-prolyl cis-trans isomerase A;Peptidyl-prolyl cis-trans isomerase A, N-terminally processed	V9HWF5;A8K486;P62937;B2RE56;B4DM82;Q71V99;F8WE65;C9J5S7	HEL-S-69p;PPIA	0.474682	0.181103
Ubiquitin-conjugating enzyme E2 variant 1	Q13404;I3L0A0;G3V2F7;A0A0A0MSL3	UBE2V1;TMEM189-UBE2V1	0.524794	0.181103
60S ribosomal protein L37a	C9J4Z3;P61513;G5E9R3;M0R0A1;Q6P4E4;E9PEL3;M0R2L6	RPL37A	-1.25653	0.18679
Nucleosome assembly protein 1-like 4	A0A024RCC9;B7ZAK9;B7ZB83;B4DS05;Q99733;B7ZAC7;C9J6D1;C9JZI7;E9PNW0;E9PJJ2;E9PS34;E9PNJ7;A8MXH2;E9PKT8	NAP1L4	0.417779	0.186845
Cytochrome c	C9JFR7;G4XXL9;P99999	CYCS	0.453635	0.186986
40S ribosomal protein S9	A0A024R4M0;P46781;B5MCT8;C9JM19;B7Z732;A5D904	RPS9	0.455034	0.186986
Aldose 1-epimerase	Q96C23;Q12915;H7C320;B8ZZ75	GALM;Ibd1	0.562331	0.186986
Transaldolase	A0A140VK56;P37837;F2Z393	TALDO1	0.454351	0.187656
NA	Q53GN4;Q59ER5;Q53H17	WDR1	0.361826	0.188441
Ras-related protein Rab-35	Q15286;F5H157	RAB35	0.763628	0.188488
Heterogeneous nuclear ribonucleoproteins C1/C2;Heterogeneous nuclear ribonucleoprotein C-like 4;Heterogeneous nuclear ribonucleoprotein C-like 1;Heterogeneous nuclear ribonucleoprotein C-like 3;Heterogeneous nuclear ribonucleoprotein C-like 2	G3V4W0;B4DY08;B2R5W2;G3V4C1;B2R603;A8K9A4;P07910;G3V2Q1;G3V576;B3KX96;B4DQQ2;G3V2D6;G3V5V7;D3DPI2;G3V555;G3V575;A0A0G2JPF8;A0A0G2JNQ3;P0DMR1;O60812;B7ZW38;B2RXH8	HNRNPC;hCG_1641229;HNRNPCL4;HNRNPCL1;HNRNPCL3;HNRNPCL2	0.508816	0.1885
Insulin-like growth factor-binding protein 5	A0A024R433;P24593;C9JXX4	IGFBP5	0.925851	0.1885
Sec1 family domain-containing protein 1	Q53GW1;Q8WVM8;B7Z738;B7Z5N7	SCFD1	1.09276	0.1885
Neural cell adhesion molecule 1	A0A087WWD4;P13591;A0A087WX77;A0A087WV75	NCAM1	0.645844	0.188546
Choline-phosphate cytidylyltransferase A;Choline-phosphate cytidylyltransferase B	C9J050;C9JEJ2;P49585;D3DXB2;B4E322;H7C1T3;B2R8P1;H7BZN1;C9J2E1;Q9Y5K3	PCYT1A;hCG_2002711;PCYT1B	0.407001	0.18927
Rootletin	B1AKD8;Q5TZA2;A1L0S9;A1L0S8;A0A087WW81	CROCC	0.503159	0.18927
Ferrochelatase;Ferrochelatase, mitochondrial	Q53FU1;Q7KZA3;P22830;Q5TZY0;B4DSA4;K7ELX4	DKFZp686P18130;FECH	0.590363	0.189713
Tubulin beta-4A chain	P04350;B4DE77;B4DJ43;B4DFH6	TUBB4A	0.889179	0.190893
26S protease regulatory subunit 10B	V9HW24;A0A087X2I1;P62333	HEL-S-73;PSMC6	0.508885	0.192404
Carbonyl reductase [NADPH] 1	P16152;E9PQ63;A8MTM1	CBR1	0.75007	0.192404
Medium-chain specific acyl-CoA dehydrogenase, mitochondrial	A0A0S2Z366;Q5T4U5;Q5HYG7;P11310;B7Z9I1;B4DWX6;B4DJE7;B4DVE0	ACADM;DKFZp686M24262	-0.527239	0.19241
Annexin;Annexin A11	Q5T0G8;P50995;Q6ICS0;Q59EP1;B7Z6L0;B4DPJ2	ANXA11	-0.489103	0.19241
T-complex protein 1 subunit epsilon	V9HW37;P48643;B4DZT5;E7ENZ3;Q9BU08;B7ZAR1;B4DDU6;B4DXI1;E9PCA1;B4DE30;B4DYC8;B4DX08;Q96GI1	HEL-S-69;CCT5	0.421488	0.19241
Radixin	B0YJ88;P35241;B7Z2S7;Q6PKD3;Q05CU6	RDX	0.55528	0.19241
Valine--tRNA ligase	A0A024RCN6;P26640;A0A140T936	VARS	0.608577	0.19241
Ras suppressor protein 1	Q32Q10;Q15404;B0YJ73	RSU1	-0.667879	0.192821
Unconventional myosin-XVIIIa	A0A0D9SFK2;A0A024QZ63;Q92614;B4DZ32	MYO18A;hCG_27198	0.806623	0.192821
Sorbitol dehydrogenase	V9HW89;Q00796;H0YLA4;B4DKI2	HEL-S-95n;SORD	0.726238	0.194795
Protein disulfide-isomerase A6	Q15084	PDIA6	0.434959	0.196094
Sulfurtransferase;Thiosulfate sulfurtransferase	Q53EW8;Q16762;B4DVZ4	TST	0.427424	0.196172
Hypoxanthine-guanine phosphoribosyltransferase	Q6LET3;A0A140VJL3;P00492	HPRT1	0.753151	0.196702
Ras-related protein Rab-27A	Q6IAS8;A2RU94;P51159;H3BN55;H3BUD9;H3BS49;H3BVH7	RAB27A	0.751937	0.196749
ADP-ribosylation factor-like protein 3	P36405	ARL3	0.743154	0.197826
cAMP-dependent protein kinase catalytic subunit alpha	A0A024R7J0;P17612;A8K8B9;Q15136;K7ERP6	PRKACA;KIN27	0.413753	0.198104
Copine-5	Q9HCH3	CPNE5	0.782217	0.198104
Tubulin alpha-8 chain	C9J2C0;Q9NY65;Q7Z3M3	TUBA8;DKFZp686L04275	-2.27507	0.19835
NA	H7BZJ3	PDIA3	0.966115	0.198538
Nucleophosmin	A0A0S2Z4G7;A0A0S2Z491;P06748;A0A140VJQ2;A4ZU86;Q9BTI9	NPM1	0.393097	0.198556
40S ribosomal protein S19	B0ZBD0;Q8WVX7;P39019;A0A075B6E2	RPS19	0.53112	0.198556
Protein transport protein Sec61 subunit beta	P60468;Q53FA5	SEC61B	0.664003	0.198556
Eukaryotic peptide chain release factor GTP-binding subunit ERF3A	Q7KZX8;B2RCT6;A8K2W7;P15170;H3BR35	GSPT1	0.698905	0.198556
Proteasome subunit beta type;Proteasome subunit beta type-7	Q6IBT1;E9KL30;Q99436;Q86U62;B2RAQ9;Q5TBG5	PSMB7	0.475156	0.198684
RuvB-like 2	Q9Y230;B3KNL2;M0R0Y3	RUVBL2	0.43719	0.198962
NA	A6MUU8	MIF	1.25076	0.198962
60S ribosomal protein L7a	P62424;Q5T8U3	RPL7A	0.36836	0.201762
14-3-3 protein zeta/delta	D0PNI1;P63104;E7EX29;B0AZS6;B7Z2E6;H0YB80;E7ESK7	YWHAZ	0.358544	0.20184
Starch-binding domain-containing protein 1	O95210;B3KMK8;B4DK68	STBD1	-0.860167	0.204178
Pleckstrin homology domain-containing family A member 7	E9PKC0;Q6IQ23;H0YDE2;A0A1B0GUN0	PLEKHA7	0.680025	0.204602
Coronin;Coronin-1C	Q53G58;B3KN06;A0A024RBI5;Q59EA2;Q9ULV4;B4DMH3;B4E3S0;B7Z9V0	CORO1C	1.02733	0.204602
Calcium-binding mitochondrial carrier protein Aralar2	Q53GR7;Q9UJS0;B7Z2E2	SLC25A13	0.518034	0.204949
Actin-related protein 2/3 complex subunit 5;Actin-related protein 2/3 complex subunit 5-like protein	B3KPC7;A0A024R897;Q9BPX5	ARPC5L	0.802478	0.204949
Histone-binding protein RBBP7	Q6FHQ0;Q16576;E9PC52;A8K6A2;Q5JP01	RBBP7	0.723352	0.207364
Histone H1x	Q92522	H1FX	0.489057	0.209683
Elongation factor G, mitochondrial	E5KND5;Q96RP9;C9IZ01;D3DNL3;F8WAU4	GFM1	0.788816	0.20974
Translation initiation factor eIF-2B subunit epsilon	Q13144;H7C2X0;C9JRD9;Q59HD8	EIF2B5	-0.497543	0.209783
14-3-3 protein gamma;14-3-3 protein gamma, N-terminally processed	P61981;B3KNB4;B4DE78;B4DHC4	YWHAG	0.49854	0.209783
Apoptosis inhibitor 5	G3V1C3;Q9BZZ5;B4DDR3;H0YER7	API5	0.684206	0.209783
Protein mago nashi homolog	P61326	MAGOH	0.721122	0.209783
DNA helicase;DNA replication licensing factor MCM2	B3KXZ4;P49736;B7Z8Z6;H0Y8E6;B4DSV5;Q9BWF4	MCM2	1.03822	0.209783
Adenylosuccinate synthetase isozyme 1	Q8N142	ADSSL1	-0.384681	0.209901
Isoleucine--tRNA ligase, cytoplasmic	Q59G75;P41252;J3KR24;A0A0A0MSX9;Q7Z3U5;Q7Z355;Q6P0M4;B4DVX2;Q7L4K8	IARS;DKFZp686L0869;DKFZp686L17145	0.580288	0.209901
PI-PLC X domain-containing protein 3	B3KXD1;Q63HM9	PLCXD3	0.670738	0.210891
E3 ubiquitin/ISG15 ligase TRIM25	Q14258	TRIM25	0.649827	0.212414
Oxygen-dependent coproporphyrinogen-III oxidase, mitochondrial	P36551	CPOX	0.894435	0.21447
Myomesin-2	A0A024QZ61;P54296;E7EWH9;B4DNE9;A0A0J9YVV7	MYOM2	-0.708347	0.214552
26S proteasome non-ATPase regulatory subunit 11	O00231;B4DTS5	PSMD11	0.289142	0.215306
Transmembrane emp24 domain-containing protein 4	Q7Z7H5	TMED4	0.465286	0.215493
Glutathione peroxidase;Phospholipid hydroperoxide glutathione peroxidase, mitochondrial	K7ERP4;A0A087X2I2;A0A087WT12;P36969;Q6PI42;K7EJ20;K7EKX7;R4GNE4;K7ENB4	GPX4	0.543078	0.215639
NADH dehydrogenase [ubiquinone] flavoprotein 3, mitochondrial	P56181	NDUFV3	-0.775839	0.216161
Ras-related protein Rab-1A	Q5U0I6;P62820;E7END7;B7Z8M7	RAB1A	0.33532	0.216161
Glutaryl-CoA dehydrogenase, mitochondrial	A0A024R7F9;Q92947;B4DK85;B4DUY0	GCDH	0.625221	0.217701
Serpin H1	A0A024R5K8;P50454;B4DN87;A8K259;E9PR70;E9PK86;E9PMI5	SERPINH1	0.492511	0.219489
Signal recognition particle receptor subunit alpha	P08240;Q6IAX9;A0A024R3M0	SRPR	0.559289	0.22033
Galectin-1	P09382	LGALS1	-1.0214	0.220358
Neuron navigator 1	Q8NEY1	NAV1	-0.77562	0.221174
Vesicle-trafficking protein SEC22b	O75396	SEC22B	0.619582	0.222057
Glutathione peroxidase 7	Q96SL4	GPX7	0.641753	0.222117
Plasminogen activator inhibitor 1 RNA-binding protein	Q8NC51;D3DQ70;Q5VU21;Q63HR1;D3DQ69	SERBP1;DKFZp686P17171	0.986275	0.222274
Cytosolic non-specific dipeptidase	B4DV28;Q96KP4;A0A024R382;B4DPF1	CNDP2	0.392197	0.222538
Monocarboxylate transporter 4	A0A024R8U1;O15427;Q53G91;J3QQV2;J3QSC3	SLC16A3	0.794307	0.222538
Nitrilase homolog 1	B7Z410;Q86X76;B2R8D1	NIT1	0.540109	0.222796
Complex I assembly factor TIMMDC1, mitochondrial	Q9NPL8;C9JU35;G3XA94	TIMMDC1	0.509203	0.224547
Clathrin light chain B	A0A024R7S3;P09497	CLTB	-0.993418	0.224946
Choline transporter-like protein 2	A0A024R798;A0A024R7D2;A0A088QF11;A0A088QCU6;Q8IWA5	SLC44A2	0.394126	0.224946
Sideroflexin-1	Q9H9B4;D6RFI0	SFXN1	0.401789	0.224946
Gamma-enolase;Enolase	Q6FHV6;P09104;A8K3B0;F5H0C8	ENO2	0.467126	0.224946
Copine-1	F2Z2V0;Q99829;A6PVH9;E7ENH5;B0QZ18;Q5JX58;Q5JX59;Q5JX60;Q5JX44;Q5JX55;Q5JX56;Q5JX45;Q59EI4;Q5JX54;Q5JX61;Q5JX52	CPNE1	0.845965	0.224946
Tumor susceptibility gene 101 protein	F5H442;Q99816;D3DQY6	TSG101	0.938459	0.224946
RNA-binding protein EWS	B0QYK0;Q01844;H7BY36;A0A0D9SFL3;C9JGE3	EWSR1	1.20526	0.224946
Growth hormone-inducible transmembrane protein	B4DSV8;B4DPG9;Q9H3K2;Q6FIA7;B4DNL0;Q9Y6G2	GHITM	0.42925	0.2258
ADP-ribosylation factor-like protein 2	Q53YD8;P36404	hCG_23373;ARL2	0.683464	0.2258
Vigilin	B2R5V9;A0A024R4E5;Q00341;H0Y394;B4DKR8;Q6ZS03;Q96CF6	HDLBP	0.698074	0.2258
AP-3 complex subunit delta-1	O14617;Q6PK82	AP3D1	0.511572	0.226199
Kinesin-like protein;Kinesin-1 heavy chain	V9HW29;P33176;D3DRX6	HEL-S-61;KIF5B	0.463264	0.227342
Lumican	P51884;Q53FV4	LUM	1.38597	0.228822
Dual specificity mitogen-activated protein kinase kinase 2	P36507;B3KS97;Q7Z370;G5E9C7	MAP2K2;DKFZp686L02273	0.809868	0.229007
MICOS complex subunit MIC19	A4D1N4;C9JRZ6;Q9NX63;F8WAR4;B7Z1X9	CHCHD3	-0.38035	0.230432
Lysophospholipase-like protein 1	Q5VWZ2	LYPLAL1	0.586876	0.230937
NA	CON__P02666	NA	-3.42395	0.231179
Protein unc-45 homolog B	Q8IWX7;H0UID2	UNC45B	-0.39815	0.231983
Histone H1.3	P16402	HIST1H1D	0.546638	0.231983
Serpin B6	A0A024QZX3;P35237;A0A024QZX5;A0A087X1N8;Q8IXH2	SERPINB6	0.383217	0.233291
40S ribosomal protein S21	Q8WVC2;Q6FGH5;P63220;Q9BYK1	RPS21	0.402199	0.233947
Protein CASP	Q13948	CUX1	-0.924487	0.234253
Peptidyl-prolyl cis-trans isomerase;Peptidyl-prolyl cis-trans isomerase FKBP3	Q53GD8;Q00688	FKBP3	0.494163	0.234253
40S ribosomal protein S25	P62851	RPS25	0.666264	0.234253
Lysine--tRNA ligase	Q15046;Q6ZTI3	KARS	0.570461	0.234706
28S ribosomal protein S26, mitochondrial	Q9BYN8	MRPS26	0.634187	0.236324
4-trimethylaminobutyraldehyde dehydrogenase	P49189;B4DE91;B9EKV4;B4DX14;B4DYY1	ALDH9A1	0.298374	0.23645
LanC-like protein 1	E9PHS0;Q6FHH6;Q53TN2;B2R602;A0A024R3Z5;O43813;F8WDS9;B4DGM7	LANCL1	0.439183	0.23645
Pyruvate dehydrogenase phosphatase regulatory subunit, mitochondrial	Q8NCN5;B4DZL5;A8MT40;H3BQG3	PDPR	0.739072	0.23645
NA	A0A087WZE9	HMGN3	0.777501	0.23645
Heme-binding protein 1	A0A024RAS8;Q9NRV9;F5GWX2	HEBP1	0.510278	0.236629
NA	Q71U02	NA	0.94099	0.236916
Proteasome subunit beta type-1;Proteasome subunit beta type	A0A140VK45;P20618;Q53FT8	PSMB1	0.446104	0.237763
Glucose-6-phosphate isomerase	B4DE36;P06744;A0A0A0MTS2;K7EQ48;A0A0J9YXP8;A0A0J9YX90;A0A0J9YYH3	GPI	0.450639	0.237763
Vacuolar protein sorting-associated protein 45	Q9NRW7;A0AR27;B7Z5E4;A0A087WU65;B7Z360;B7Z5D4;A0A1B0GXI6;Q5T4Q0;B7Z1J7	VPS45	0.717603	0.238761
Dysferlin	O75923	DYSF	-0.437232	0.239016
SEC23-interacting protein	B4DWG1;B3KM47;Q9Y6Y8;B3KN10	SEC23IP	0.688651	0.2391
Cullin-associated NEDD8-dissociated protein 2	O75155	CAND2	-0.554696	0.239676
Tubulin beta-6 chain	Q9BUF5;B4DP54;K7ESM5;B3KS31;B4E386	TUBB6	0.476097	0.239676
Endoplasmic reticulum resident protein 29	V9HW71;P30040;F8VY02	HEL-S-107;ERP29	0.554522	0.239842
RNA-binding protein with serine-rich domain 1	H3BPG5;H3BV80;H3BMM9;H3BTC0;D3DU92;Q15287;H3BMS0;A0A024R9P1	RNPS1;hCG_2026745	0.641613	0.242718
NA	Q6MZS5	DKFZp686A13234	0.684298	0.243273
Ras-related protein R-Ras2	P62070;E9PK85	RRAS2	0.672261	0.244413
Polymerase delta-interacting protein 2	B4DEM9;Q9Y2S7	POLDIP2	0.506585	0.245013
ATPase ASNA1	A0A087WXS7;O43681;B4DEE5;K7ERW9	ASNA1	0.534975	0.245209
Ubiquitin-40S ribosomal protein S27a;Ubiquitin;40S ribosomal protein S27a;Ubiquitin-60S ribosomal protein L40;Ubiquitin;60S ribosomal protein L40;Polyubiquitin-B;Ubiquitin;Polyubiquitin-C;Ubiquitin	Q5RKT7;B2RDW1;P62979;J3QS39;J3QTR3;F5H6Q2;Q3MIH3;F5GYU3;F5H2Z3;F5H265;Q5UGI3;B4DV12;F5H388;F5H747;F5GXK7;J3QKN0;Q5U5U6;Q5PY61;Q9UFQ0;Q96C32;Q96MH4;L8B4I8;L8B196;Q96H31;L8B4R0;A8K674;L8B4Z6;L8B4M0;L8B4J3;Q66K58;Q59EM9;P62987;P0CG47;P0CG48;Q8WYN9;M0R1V7;Q49A90;M0R1M6;M0R2S1	RPS27A;HEL112;UBB;UBC;UBA52;DKFZp434K0435;UbC	-0.416571	0.246891
Dynein light chain roadblock-type 1;Dynein light chain roadblock-type 2	B4DFR2;Q9NP97;A0A140VJH9;B1AKR6;Q8TF09	DYNLRB1;DYNLRB2	-0.564233	0.24758
Hemopexin	P02790;Q9BS19	HPX	1.93548	0.24758
Insulin-like growth factor 2 mRNA-binding protein 1	Q9NZI8;D3DTW3	IGF2BP1	0.397263	0.248011
Succinate-semialdehyde dehydrogenase, mitochondrial	X5DQN2;X5D299;P51649;C9J8Q5;A8K435	ALDH5A1	-0.578726	0.248248
MICOS complex subunit MIC10	A0A087WU07;Q5TGZ0;R4GMM1;R4GNA1	MINOS1;MINOS1-NBL1	-0.374246	0.248347
Signal transducer and activator of transcription 1-alpha/beta;Signal transducer and activator of transcription	P42224;J3KPM9	STAT1	0.534554	0.248347
NA	A0A024R5W6	TPM1	-0.626465	0.248687
Plasminogen receptor (KT)	Q9HBL7	PLGRKT	0.488172	0.251848
Troponin T, cardiac muscle	E7EPW4;A0A0A0MRJ5;A0A0A0MRJ4;P45379;Q7Z554;A0A024R953;Q15607;Q15608;E7EPN8	TNNT2;HNTN1	-0.480434	0.251985
Protein FAM162A	Q96A26;F8W7Q4;E9PH05;B4DF97	FAM162A	0.538605	0.251985
Activated RNA polymerase II transcriptional coactivator p15	Q6IBA2;Q59G24;P53999;B7Z1Z0	PC4;SUB1	0.656929	0.251985
Cullin-3	Q53S54;A0A024R475;Q13618;B7Z600	CUL3	0.861764	0.251985
Heterogeneous nuclear ribonucleoprotein H;Heterogeneous nuclear ribonucleoprotein H, N-terminally processed	G8JLB6;P31943;E9PCY7;D6RIT2;D6RIU0;D6RBM0;E7EQJ0;D6RAM1;D6R9T0;D6RFM3;D6RDU3;D6RJ04;D6RIH9	HNRNPH1	0.396936	0.252055
26S proteasome non-ATPase regulatory subunit 9	J3KN29;O00233;F5H5V4;F5GX23;F5H169	PSMD9	0.796112	0.252055
Acyl-coenzyme A thioesterase 9, mitochondrial	Q9Y305;H7C5Q2	ACOT9	-0.472074	0.252646
Proteasome subunit alpha type-4;Proteasome subunit alpha type;Proteasome subunit beta type	P25789;H0YN18;B2RDG0;H0YMZ1;H0YL69;H0YMA1;H0YKT8	PSMA4	0.3438	0.252646
Mitogen-activated protein kinase;Mitogen-activated protein kinase 1	Q1HBJ4;P28482;B4DHN0;Q499G7	MAPK1	0.484705	0.253987
NA	CON__Q3ZBD7	NA	-0.881857	0.255463
G-rich sequence factor 1	A0A024RD99;B7Z2D8;B7Z5F9;B3KP14;H0Y8R1;F5H5I6;B7Z3R7;H0YAK1;B3KW50;Q12849	GRSF1	0.470675	0.255463
Biliverdin reductase A	A0A140VJF4;P53004	BLVRA	-0.778952	0.255649
78 kDa glucose-regulated protein	V9HWB4;P11021	HEL-S-89n;HSPA5	0.247352	0.255649
Chloride intracellular channel protein;Chloride intracellular channel protein 1	Q5SRT3;Q53FB0;O00299	CLIC1	0.451689	0.255649
LEM domain-containing protein 2	A0A024RCZ1;Q8NC56	LEMD2	0.560671	0.255649
Nesprin-2	Q8WXH0;A0A0C4DGK3	SYNE2	0.750628	0.256115
Mitochondrial antiviral-signaling protein	Q7Z434	MAVS	0.500578	0.256981
Ribose-phosphate pyrophosphokinase 1	Q53FW2;P60891;B1ALA9;B7ZB02	PRPS1	0.508408	0.256981
ER membrane protein complex subunit 1	Q8N766	EMC1	0.763201	0.256981
Eukaryotic initiation factor 4A-III;Eukaryotic initiation factor 4A-III, N-terminally processed	A0A024R8W0;P38919	DDX48;EIF4A3	0.46125	0.258255
Heterogeneous nuclear ribonucleoprotein A0	Q13151	HNRNPA0	0.562825	0.258255
SRA stem-loop-interacting RNA-binding protein, mitochondrial	Q9GZT3;A0A087WUN7;H0YJ40;G3V4X6;G3V2S9;H0YJW7	SLIRP	-0.850128	0.258319
Prolactin regulatory element-binding protein	Q9HCU5;B5MC98;A8K813;Q05DB2	PREB	0.823682	0.258319
NADH dehydrogenase [ubiquinone] 1 alpha subcomplex subunit 2	O43678	NDUFA2	-0.654077	0.259195
Optic atrophy 3 protein	Q9H6K4;B4DK77	OPA3	0.390439	0.259195
ELAV-like protein 1	Q15717;M0QZR9	ELAVL1	0.436871	0.259195
Protein kinase C delta-binding protein	Q969G5;E9PIE3	PRKCDBP	0.571397	0.259195
UPF0160 protein MYG1, mitochondrial	F8VR84;Q8WYI2;Q86UA3;Q9HB07;F8VQQ3;Q96CT6	C12orf10;MST024	1.63532	0.259195
NADH dehydrogenase [ubiquinone] iron-sulfur protein 3, mitochondrial	O75489;Q53FM7;Q9UF24	NDUFS3;DKFZp586K0821	-0.507269	0.260507
BolA-like protein 2	Q9H3K6;A0A087WZT3	BOLA2	0.426307	0.26112
Guanine nucleotide-binding protein G(I)/G(S)/G(T) subunit beta-1	B2R6K4;A0A024R056;P62873;F6UT28;B1AKQ8;F6X3N5	GNB1	1.03535	0.26112
Enolase	B4DUJ6	NA	-1.1714	0.261289
Probable C->U-editing enzyme APOBEC-2	Q9Y235;B4DUL0	APOBEC2	-0.521001	0.261289
26S protease regulatory subunit 6B	A8K2M0;P43686	PSMC4	0.429678	0.261289
A disintegrin and metalloproteinase with thrombospondin motifs 19	Q8TE59;B3KV14	ADAMTS19	0.770569	0.261289
Trifunctional enzyme subunit beta, mitochondrial;3-ketoacyl-CoA thiolase	P55084;B4DY96;F5GZQ3;B4DDC9;B5MD38;D6W539	HADHB	-0.377087	0.261521
Reticulocalbin-1	V9HW95;Q15293;Q5J7V8	HEL-S-84;RCN1	0.721578	0.261998
Coatomer subunit beta	P35606	COPB2	0.604204	0.262554
Prolyl 4-hydroxylase subunit alpha-2	Q05DA4;O15460;Q5HYD8	P4HA2;DKFZp686M0919	0.647298	0.262573
Chloride intracellular channel protein;Chloride intracellular channel protein 5	Q53G01;Q9NZA1;B2RAZ0;Q7Z2R8	CLIC5;MST130	0.742373	0.262932
E3 ubiquitin-protein ligase HUWE1	A0A024R9U8;A0A024R9W5;Q7Z6Z7;A0A024R9Y3;Q5H924	HUWE1	0.827463	0.26302
Ras-related protein Rab-18	Q9NP72;A0A087X163;B7Z5V3;Q5W0J0;B7Z4P9;H0Y6T8	RAB18	-0.414985	0.26325
Protein transport protein Sec61 subunit alpha isoform 2	F8W776;Q9H9S3;B3KQ68;Q8TC24	SEC61A2	0.623179	0.26325
DnaJ homolog subfamily B member 11	Q9UBS4;B3KW63;H7C2Y5	DNAJB11	0.545384	0.263956
Ras-related protein Rab-10	P61026;Q53T70	RAB10	0.983599	0.264577
DNA topoisomerase 1	P11387;B9EG90	TOP1	0.580243	0.26461
Protein quaking	Q96PU8;H0YG47	QKI	0.58406	0.26461
Protein deglycase DJ-1	V9HWC2;Q99497;K7ELW0;K7EN27	HEL-S-67p;PARK7	-0.277254	0.264773
Dihydrolipoyl dehydrogenase;Dihydrolipoyl dehydrogenase, mitochondrial	B4DFL1;A0A024R713;P09622;E9PEX6;B4DMK9	DLD	-0.362576	0.26718
ATP-dependent 6-phosphofructokinase, liver type	P17858;Q7L2M7	PFKL	0.355977	0.267699
Collagen alpha-1(II) chain;Collagen alpha-1(II) chain;Chondrocalcin	P02458	COL2A1	0.491951	0.267699
NA	A0A0D9SF30	NCAM1	-0.888502	0.269576
D-beta-hydroxybutyrate dehydrogenase, mitochondrial	Q02338;E9PCG9;C9K0G7	BDH1	-0.566639	0.269576
Utrophin	P46939	UTRN	0.52407	0.269576
ATP-binding cassette sub-family D member 3	B4DL07;P28288;B4DZ22	ABCD3	0.723386	0.269576
Cytochrome c oxidase subunit 8A, mitochondrial	Q53XN1;U3KQK5;P10176	COX8A	0.486219	0.270294
Phosphatidylethanolamine-binding protein 1;Hippocampal cholinergic neurostimulating peptide	D9IAI1;P30086;A0A0K0K1J6;B4DRT4;V9HW05	HEL-S-34;PEBP1;HEL-210	0.335706	0.270505
C-1-tetrahydrofolate synthase, cytoplasmic;Methylenetetrahydrofolate dehydrogenase;Methenyltetrahydrofolate cyclohydrolase;Formyltetrahydrofolate synthetase;C-1-tetrahydrofolate synthase, cytoplasmic, N-terminally processed	A0A024R652;P11586;F5H2F4;B7Z809	MTHFD1	0.384779	0.271482
Galactokinase	V9HWE7;P51570;Q6ZP37;Q71UH7;K7ERJ9;B4E1A8	HEL-S-19;GALK1	0.542819	0.271975
Protein QIL1	A0A140TA86;Q5XKP0;K7EIR2;A0A140TA84	QIL1;C19orf70	-1.13198	0.272016
Nidogen-2	Q14112;A0A087WZP6;H0YJV3;B4DPX8	NID2	-0.436164	0.272016
HIV Tat-specific factor 1	O43719;B4DRS4;Q5H919;Q5H918	HTATSF1	0.593251	0.272016
Serine/threonine-protein phosphatase 2A 55 kDa regulatory subunit B;Serine/threonine-protein phosphatase 2A 55 kDa regulatory subunit B alpha isoform	Q56VW8;A0A140VJT0;P63151	PPP2R2A	0.780507	0.272016
Importin-9	Q96P70	IPO9	0.794304	0.272016
Secretory carrier-associated membrane protein 3	Q6FHJ5;O14828	SCAMP3	0.740907	0.27211
Solute carrier family 2, facilitated glucose transporter member 3	B7Z966;P11169;Q59F54;B7Z5A7	SLC2A3	0.421891	0.272972
Proteasome subunit beta type-5	P28074;A0A140VJS7	PSMB5	0.394228	0.274568
Heterogeneous nuclear ribonucleoprotein H2	P55795;B4DFK9;B4DP00	HNRNPH2	0.452436	0.274568
NA	A0A0J9YXC7	NA	0.376145	0.274937
Far upstream element-binding protein 2	A0A087WTP3;Q92945;B4DV73;M0R0I5	KHSRP	0.586359	0.274953
39S ribosomal protein L43, mitochondrial	A8K4V4;H0Y6Y8;B1AL05;Q8N983	MRPL43	0.681068	0.274987
Selenocysteine-specific elongation factor	P57772;C9J8T0	EEFSEC	0.717649	0.2755
Adipocyte plasma membrane-associated protein	Q9HDC9;H0Y512	APMAP	0.689568	0.275562
Lipoamide acyltransferase component of branched-chain alpha-keto acid dehydrogenase complex, mitochondrial	P11182;B4E1Q7;Q5VVL7	DBT	-0.361327	0.276079
NADH dehydrogenase [ubiquinone] flavoprotein 2, mitochondrial	Q6IPW4;Q6IB76;A8K750;E7EPT4;P19404;Q9UEH5	NDUFV2	-0.684525	0.276216
Vacuolar protein sorting-associated protein 4A	I3L4J1;A0A024R705;Q9UN37;Q9NXK5;Q9UF30	VPS4A;DKFZp434E0418	0.431128	0.276311
26S proteasome non-ATPase regulatory subunit 3	B3KNN7;Q8N9M2;O43242;B4DEB0;Q96N86;B4DV84;Q6IBN0;B4DPM7	PSMD3	0.374223	0.278407
39S ribosomal protein L24, mitochondrial	Q96A35	MRPL24	0.396861	0.278407
Tyrosine-protein phosphatase non-receptor type substrate 1;Signal-regulatory protein beta-1 isoform 3	P78324;B4DP97;D3DVW9;Q5TFQ8	SIRPA;PTPNS1;SIRPB1	0.495874	0.278407
Peroxidasin homolog	Q92626;H7C1W1	PXDN	0.62582	0.278407
Popeye domain-containing protein 2	Q9HBU9;C9J3P7	POPDC2	0.585618	0.281307
Sodium/potassium-transporting ATPase subunit beta-3	P54709;D3DNF9;Q58I18	ATP1B3	0.828355	0.282378
NADH dehydrogenase [ubiquinone] 1 alpha subcomplex subunit 9, mitochondrial	Q9BTT5;Q16795;A8K4V2	NDUFA9	-0.320533	0.283803
Ras-related protein R-Ras	A0A024QZF2;P10301	RRAS	-0.30323	0.283803
Mitochondrial pyruvate carrier 2	Q5R3B4;B2R4Q7;A0A024R8Z5;O95563	MPC2;BRP44	0.51484	0.283803
Katanin p60 ATPase-containing subunit A-like 2	K7EM02;K7EIJ8;Q8IYT4	KATNAL2	-0.456107	0.28583
39S ribosomal protein L11, mitochondrial	Q53G19;Q9Y3B7	MRPL11	0.54551	0.28583
Caprin-1	G3V153;B3KXU8;Q14444;E9PLA9;B4DSF8	CAPRIN1	0.937964	0.28583
ATP synthase subunit gamma	B4DL14;B4DFE6	NA	-0.280808	0.286142
Elongation factor Tu, mitochondrial	P49411	TUFM	0.204213	0.288413
Crk-like protein	P46109	CRKL	0.566065	0.288413
AP-2 complex subunit alpha-1	O95782	AP2A1	0.646415	0.289359
Solute carrier family 2, facilitated glucose transporter member 1	B3KVN0;Q0P512;Q59GX2;P11166;B4DKW1;B4DDR6	SLC2A1	0.49251	0.289558
28S ribosomal protein S14, mitochondrial	O60783;B2R4A5	MRPS14	0.500517	0.290098
Chloride channel CLIC-like protein 1	A0A024R0G0;Q96S66;A0A024R095	CLCC1	0.823701	0.290098
Persulfide dioxygenase ETHE1, mitochondrial	A0A0S2Z580;A0A0S2Z5B3;M0QXB5;O95571;B2RCZ7;A0A0S2Z5N8	ETHE1	-0.442853	0.290276
Inositol monophosphatase 1	A0A024R830;A0A140VJL8;P29218;E5RIP7;H0YBL1;E5RG13;E5RI82;E5RGY4	IMPA1	0.504493	0.290797
Protein S100;Protein S100-A11;Protein S100-A11, N-terminally processed	V9HWH9;P31949;B2R5H0	HEL-S-43;S100A11	0.824711	0.290797
Plexin-B2	O15031	PLXNB2	1.146	0.291868
NA	A8K6Q8;B7Z2I6	NA	0.424373	0.292307
40S ribosomal protein S7	P62081;B5MCP9	RPS7	0.321389	0.295611
DNA damage-binding protein 1	Q16531;F5GY55;B7Z2A1;B4DSA8;B4DZP5	DDB1	0.394763	0.295722
DNA replication licensing factor MCM6	Q14566;Q4ZG57	MCM6	0.564998	0.295722
Prosaposin;Saposin-A;Saposin-B-Val;Saposin-B;Saposin-C;Saposin-D	Q53FJ5;A0A024QZQ2;C9JIZ6;Q59EN5;P07602;B4DEK5;B4DRB7;Q5BJH1	PSAP	-0.41607	0.29624
Cat eye syndrome critical region protein 5	Q9BXW7	CECR5	0.295897	0.29624
Protein ERGIC-53	B2R774;A0A024R2A7;P49257;Q53FS4	LMAN1	0.660965	0.297963
General transcription factor II-I	X5D2J9;Q499G6;X5D939;X5DNP5;A8K9W7;X5DR09;P78347;B4DH52;B4DRA9	GTF2I	0.531597	0.298239
Protein syndesmos	B2RD96;Q9BRJ7;K7ENA3;K7EIN2;W4VSQ8	NUDT16L1	0.786116	0.298796
40S ribosomal protein S10;Putative 40S ribosomal protein S10-like	P46783;Q59GE4;F6U211;Q9NQ39	RPS10;RPS10P5	0.363477	0.299778
Succinyl-CoA:3-ketoacid-coenzyme A transferase;Succinyl-CoA:3-ketoacid coenzyme A transferase 1, mitochondrial	A0A024R040;P55809;Q6IAV5;E9PDW2;B7Z609	OXCT1;OXCT	-0.320369	0.301338
E3 UFM1-protein ligase 1	O94874	UFL1	0.833404	0.301338
Double-stranded RNA-binding protein Staufen homolog 1	A0A087X1A5;Q5JW30;A8K622;Q59F99;O95793;B3KRE0	STAU1	0.498583	0.304327
Hexokinase;Hexokinase-2	E9PB90;P52789;Q68E10;A8K2U2;Q53QX9	HK2;DKFZp686M1669	0.692641	0.304354
Dynactin subunit 4	A0A0S2Z5B8;A0A0S2Z5D4;Q9UJW0	DCTN4	0.745107	0.304354
Methionine--tRNA ligase, cytoplasmic	A8K492;P56192;B4DF61;B4E0E9	MARS	0.781923	0.304536
Endoplasmic reticulum-Golgi intermediate compartment protein 2	A0A024RB08;A0A087WU02;Q9HC06;Q96RQ1;H0YI50;F8VPA6	ERGIC2	-0.744815	0.304755
Protein-tyrosine-phosphatase;Receptor-type tyrosine-protein phosphatase delta	Q59H90;Q3KPI9;F5GWR7;Q2HXI4;P23468	PTPRD	-0.656951	0.304755
Isobutyryl-CoA dehydrogenase, mitochondrial	Q9UKU7;Q59FC2	ACAD8	0.41528	0.304755
MOB kinase activator 1A;MOB kinase activator 1B	Q9H8S9;Q7L9L4;D6RCK3;B3KSH6;Q4W5E0	MOB1A;MOB1B;MOBKL1A;MOB4A	0.505058	0.304755
Magnesium transporter protein 1	B4DH58;A0A087WU53;Q9H0U3;A8MUP5	MAGT1	0.464358	0.305571
Heat shock protein beta-3	Q6ICS9;Q12988	HSPB3	0.325699	0.307366
ATP-binding cassette sub-family F member 1	Q2L6I2;Q8NE71;Q59F96;H0YGW7;B4DNU2	ABCF1	0.619899	0.307366
ATP-dependent 6-phosphofructokinase;ATP-dependent 6-phosphofructokinase, muscle type	A0A024R0Y5;P08237;A0A0S2Z4A1;Q96I60;A0A0S2Z4I1;Q7KYX9	PFKM	-0.301025	0.308564
Insulin-like growth factor 2 mRNA-binding protein 2	F8W930;Q9Y6M1;B4DKT5	IGF2BP2	0.359358	0.308564
NAD-dependent protein deacylase sirtuin-5, mitochondrial	A0A024R012;Q9NXA8	SIRT5	0.436965	0.308564
60S ribosomal protein L36	Q9Y3U8;J3QSB5	RPL36	0.442468	0.308564
Apoptosis-inducing factor 1, mitochondrial	O95831;E9PMA0	AIFM1	-0.285809	0.308607
Serine beta-lactamase-like protein LACTB, mitochondrial	P83111	LACTB	-0.584203	0.309911
Ubiquitin-like modifier-activating enzyme 1	A0A024R1A3;P22314;B4DDE4;B4DL67	UBE1;UBA1	0.649526	0.313718
Ubiquitin-conjugating enzyme E2 L3	A8K4W8;A0A024R1A4;P68036	UBE2L3	0.689787	0.313718
Enhancer of rudimentary homolog	A0A024R6D4;P84090;G3V279	ERH	0.77769	0.313718
Adenylyl cyclase-associated protein 2;Adenylyl cyclase-associated protein	P40123;Q5JPJ8;A0A087X0J3;A0A087WZ15;E9PDI2;B7Z4M3;B7Z385	CAP2;DKFZp686D0714	-0.509401	0.313969
Ras-related protein Rab-5B	A0A024RB09;P61020;Q6FI54	RAB5B	0.359675	0.313969
Protein phosphatase 1A	B5BUD5;B2R8E4;A0A024R6A5;P35813	PPM1A	-0.580563	0.314441
Eukaryotic translation initiation factor 4 gamma 2	D3DQV9;Q59G42;B4DZF2;P78344;H0Y3P2;Q2TU89	EIF4G2;AAG1	-0.49435	0.314441
COP9 signalosome complex subunit 7a	Q9UBW8;Q567U8;F5GYF7;F5H248;F5H7C6	COPS7A	0.571531	0.314726
Small nuclear ribonucleoprotein-associated protein;Small nuclear ribonucleoprotein-associated protein N;Small nuclear ribonucleoprotein-associated proteins B and B	J3QLE5;Q66K91;Q5XPV6;B4DVS0;X5DP00;Q15182;P63162;P14678;Q53HE7;Q9UIS4;J3KRY3;S4R3P3;Q6LBS1	SNRPN;SNRPB	0.434813	0.315446
Inositol-3-phosphate synthase 1	A0A140VK73;Q9NPH2;B3KSG0;B7Z3K3	ISYNA1	0.59117	0.315541
40S ribosomal protein S5;40S ribosomal protein S5, N-terminally processed	M0R0F0;A0A024R4Q8;P46782;Q53G25;M0R0R2;M0QZN2	RPS5	0.30163	0.317638
Very-long-chain 3-oxoacyl-CoA reductase	Q53GQ0;B4DWS6;D3DR22;B3KQJ0;A0A1B0GVY6;A0A1B0GV93	HSD17B12	0.970464	0.319329
Threonine--tRNA ligase, mitochondrial	Q9BW92;U3KQG0;Q6ST48;F6S7Q7	TARS2	0.564249	0.319878
UPF0568 protein C14orf166	Q5RLJ0;Q549M8;Q9Y224;G3V4C6;H0YJB9	C14orf166	0.541542	0.320692
Atypical kinase ADCK3, mitochondrial	A0A024R3S3;Q8NI60;B4DVB7;A1L377;Q5T7A2;B4DED1;B4DN23	CABC1;ADCK3	-0.306874	0.320751
NADH dehydrogenase [ubiquinone] 1 beta subcomplex subunit 6	O95139;A0A087WZX2	NDUFB6	0.414928	0.320932
Adenylate kinase isoenzyme 1	Q6FGX9;Q53EY8;Q5T9B7;P00568;H0Y4J6	AK1	-0.430545	0.322789
NAD(P) transhydrogenase, mitochondrial	Q2TB59;A0A024R0C3;Q13423	NNT	-0.259151	0.322789
Malonyl-CoA decarboxylase, mitochondrial	O95822	MLYCD	-0.338692	0.323251
Phosphorylase b kinase regulatory subunit alpha, liver isoform	P46019	PHKA2	0.312398	0.323251
Mitochondrial Rho GTPase 1;Mitochondrial Rho GTPase	Q8IXI2;H7BXZ6	RHOT1	0.679283	0.323251
Heterogeneous nuclear ribonucleoprotein A/B	D6R9P3;D6RD18;B4DMY3;D6RBZ0;Q53F64;Q99729	HNRNPAB	0.688939	0.323251
Mitochondrial import inner membrane translocase subunit TIM44	Q53G69;O43615;Q9UPE4;M0QXU7	TIMM44;hTIM44	0.594655	0.32343
Selenium-binding protein 1	V9HWG1;Q13228;B4DPI7	HEL-S-134P;SELENBP1	0.616383	0.323961
Glycylpeptide N-tetradecanoyltransferase;Glycylpeptide N-tetradecanoyltransferase 1	Q96HI4;P30419	NMT1	0.275103	0.325067
Adenylate kinase 4, mitochondrial	P27144;D3DQ64	AK4	0.334264	0.325067
FERM, RhoGEF and pleckstrin domain-containing protein 1	C9JME2;Q9Y4F1	FARP1	0.48463	0.32645
Heterogeneous nuclear ribonucleoprotein L-like	B7WPG3;C9IYN3;A8K894;D6W592;A0A0S2Z6K1;Q8WVV9;A0A0S2Z5U3	HNRNPLL;HNRPLL	-0.574385	0.328072
Trifunctional purine biosynthetic protein adenosine-3;Phosphoribosylamine--glycine ligase;Phosphoribosylformylglycinamidine cyclo-ligase;Phosphoribosylglycinamide formyltransferase	Q3B7A7;Q59HH3;P22102;Q15374	GART	0.941565	0.328072
Heterogeneous nuclear ribonucleoprotein F;Heterogeneous nuclear ribonucleoprotein F, N-terminally processed	A0A024R7T3;P52597;B4DKS8	HNRPF;HNRNPF	0.311111	0.329905
Protein kinase C and casein kinase substrate in neurons protein 3	A0A0C4DGG1;B4DUI2;Q9UKS6;D3DQR0;E9PIY1	PACSIN3	0.347788	0.329905
Cytochrome c oxidase subunit 7A1, mitochondrial	Q6FGI7;P24310;K7ER11;H6SG12	COX7A1	0.491249	0.330372
Double-strand-break repair protein rad21 homolog	A0A024R9J0;O60216	RAD21	0.621242	0.330429
Guanine nucleotide-binding protein G(I)/G(S)/G(O) subunit gamma-7	O60262	GNG7	0.713345	0.330429
High mobility group protein B3	E7ES08;E7EQU1;O15347;E9PES6;Q7Z684	HMGB3;DKFZp779G118	-1.10843	0.330641
Serine/arginine-rich splicing factor 5	A0A024R6D8;Q59EK7;Q13243;B4DJK0;B4DUA4	SFRS5;SRSF5	0.772976	0.330755
Extended synaptotagmin-2	H7BXI1;A0A087WXU3;A0FGR8	ESYT2	-0.645119	0.333072
Glia maturation factor beta	G3V4P8;P60983	GMFB	0.370044	0.333072
Replication protein A 70 kDa DNA-binding subunit;Replication protein A 70 kDa DNA-binding subunit, N-terminally processed	P27694	RPA1	0.470414	0.333072
Pinin	A8K964;Q9H307	PNN	0.552112	0.333072
Proteasome activator complex subunit 3	K7ENH2;K9J957;V9HWJ8;A0A024R203;P61289;J7FRP4;A0A087WTV2;B3KQ25;K7ESG5;Q6FHK7	PSME3;HEL-S-283	0.352486	0.333439
Uveal autoantigen with coiled-coil domains and ankyrin repeats	H0YNH8;B7ZKM6;Q9BZF9;F5H2B9;B7ZKM7	UACA	0.547145	0.333439
Glycerol-3-phosphate dehydrogenase 1-like protein;Glycerol-3-phosphate dehydrogenase [NAD(+)]	Q8N335;C9JM46	GPD1L	0.574868	0.333439
Creatine kinase M-type;Creatine kinase M-type, N-terminally processed	P06732;B2R892;B4DUP1	CKM	0.330536	0.335705
Regulation of nuclear pre-mRNA domain-containing protein 1B	Q9NQG5;A2A2M0	RPRD1B	0.568015	0.336283
Proliferating cell nuclear antigen	Q6FHF5;P12004;Q6FI35	PCNA	1.17467	0.336283
NADH dehydrogenase [ubiquinone] 1 alpha subcomplex subunit 13	Q9P0J0;B4DEZ3;K7EJE1;E7ENQ6;B4DQP1	NDUFA13	-0.424205	0.336775
Bone marrow stromal antigen 2	A0A024R7H5;B4E0Z6;Q10589	BST2	-0.581083	0.337123
Heat shock protein 75 kDa, mitochondrial	Q59EK6;Q9BV61;A0A140VJY2;Q12931;Q53G55;Q53FS6;Q8N9Z3;K0A7K7;Q5CAQ4;I3L0K7	TRAP1	0.430318	0.337123
Lamin-B2	Q03252	LMNB2	0.270173	0.337825
Sialic acid synthase	Q9NR45;V9HW39	NANS;HEL-S-100	0.47287	0.339466
60S ribosomal protein L27a	Q9BQQ5;E9PLL6;Q6NZ52;P46776;E9PJD9;E9PLX7	L27a;RPL27A	0.356675	0.340186
LDLR chaperone MESD	Q14696	MESDC2	0.566111	0.340186
Cleavage and polyadenylation specificity factor subunit 5	B2R6U8;A0A024R6W2;O43809;H3BND3	NUDT21	0.857881	0.340186
Centromere protein V	Q7Z7K6	CENPV	0.692298	0.340259
Methylglutaconyl-CoA hydratase, mitochondrial	Q13825	AUH	-0.369273	0.341542
Catenin alpha-2	P26232;Q49AD3	CTNNA2	0.640123	0.342352
Ras-related protein Rap-1A	A8KAH9;P62834;Q5U0C3;A0A075B6Q0	RAP1A	0.342105	0.34241
ATP-dependent RNA helicase DDX19A	I3L0H8;B4DS24;Q9NUU7	DDX19A	0.52144	0.343529
Paraspeckle component 1	A0A024RDP4;B4DWI8;Q8WXF1;X6RDA4	PSPC1	0.410257	0.343725
Lupus La protein	B5BUB5;P05455	SSB	0.341358	0.343991
Tumor suppressor p53-binding protein 1	A6NNK5;Q12888;B7Z3E7;A8KA50	TP53BP1	0.607782	0.344441
CDP-diacylglycerol--inositol 3-phosphatidyltransferase	B3KSW0;Q53HA5;A8K3L7;B3KY94;O14735;H3BUR9	CDIPT	0.45064	0.34508
Mitochondrial carrier homolog 1	A8YXX5;Q9Y374;A4FVA6;A0A024RD08;A0A024RCX4;Q9NZJ7;H0Y8C3;Q8IW90	PIG60;MTCH1	-0.453477	0.345543
Sodium/potassium-transporting ATPase subunit beta-1	Q6LEU2;A3KLL5;P05026;A6NGH2	ATP1B1	0.485146	0.346165
CD109 antigen	Q6YHK3	CD109	0.623351	0.346605
Rho-associated protein kinase;Rho-associated protein kinase 1	D9ZGF8;Q13464;A0A0U1RQV4	ROCK1	0.843304	0.34729
Branched-chain-amino-acid aminotransferase;Branched-chain-amino-acid aminotransferase, mitochondrial	Q53EW7;O15382;B3KSI3;M0QXF9;M0QZ10;M0QZP4	BCAT2	0.486368	0.349074
Heat shock cognate 71 kDa protein	V9HW22;P11142;E9PKE3;Q53GZ6;Q96IS6;B3KTV0;E9PNE6;Q53HF2;A8K7Q2	HEL-S-72p;HSPA8	-0.291023	0.349277
NA	H0YJ34;A0A0U1RRM8	FERMT2	0.4401	0.349932
GTP-binding protein SAR1a	Q5SQT9;Q9NR31;Q8NG23;B2R679;Q6FID4;Q5SQT8	SAR1A;SARA1	0.602463	0.349932
TOM1-like protein 2	Q6ZVM7;B7Z8F0;B7Z2U2	TOM1L2	0.694282	0.349932
U2 small nuclear ribonucleoprotein A	Q53G61;Q53G21;P09661;H0YLR3;H0YMA0	SNRPA1	0.718787	0.349932
NADH-ubiquinone oxidoreductase 75 kDa subunit, mitochondrial	E5KRK5;P28331;B4DJ81	NDUFS1	-0.319722	0.350183
Tight junction protein ZO-1	G3V1L9;Q07157;A9CQZ8;G5E9E7;A0A087X0K9;Q6MZU1;Q68DX9	TJP1;DKFZp686A1195;DKFZp686M05161	0.358497	0.351877
Nck-associated protein 1	Q9Y2A7	NCKAP1	0.74676	0.351877
NA	A0A0D9SF54	SPTAN1	0.318433	0.352137
26S protease regulatory subunit 8	A0A140VJS3;P62195;Q59GS3;J3QSA9;J3QQM1;J3KRP2;J3QLH6	PSMC5	0.347201	0.352428
Moesin	V9HWC0;P26038;Q6PJT4	HEL70;MSN	0.351055	0.352428
Signal recognition particle 54 kDa protein	B4DDS7;P61011;G3V4F7	SRP54	0.622392	0.352428
Thrombospondin type-1 domain-containing protein 4	Q6ZMP0	THSD4	0.720467	0.352428
Coatomer subunit delta	B0YIW5;P48444;Q6MZV5;B0YIW6	ARCN1;DKFZp686M09245	0.397735	0.353235
Sphingosine-1-phosphate lyase 1	O95470	SGPL1	0.44778	0.353611
ATP synthase subunit alpha;ATP synthase subunit alpha, mitochondrial	V9HW26;P25705	HEL-S-123m;ATP5A1	-0.269022	0.354474
40S ribosomal protein S2	P15880;Q3KQT6;Q8N5L9;Q6IPX5;H0YEN5;Q8J014;E9PQD7;E9PMM9;I3L404;E9PPT0;Q8NI61;E9PM36	RPS2;rps2;OK/KNS-cl.7	0.300923	0.354474
Probable threonine--tRNA ligase 2, cytoplasmic	A2RTX5;B7ZLP8	TARSL2	0.558327	0.354474
Ataxin-10	Q9UBB4;Q7Z524	ATXN10	0.49263	0.355675
Eukaryotic translation initiation factor 2 subunit 2	Q6IBR8;P20042;B5BU01	EIF2S2	0.395822	0.356764
Dolichyl-diphosphooligosaccharide--protein glycosyltransferase 48 kDa subunit	A0A0C4DGS1;A0A024RAD5;P39656	DDOST	0.427372	0.356764
Mitochondrial import receptor subunit TOM40 homolog	A0A024R0P9;O96008;K7EKG4;K7EJ57	TOMM40	0.431159	0.356764
V-type proton ATPase catalytic subunit A	P38606;B7Z2V6	ATP6V1A	0.492361	0.356764
Mitogen-activated protein kinase;Mitogen-activated protein kinase 14	A0A024RD15;Q16539;B4E0K5;B5TY33	MAPK14	0.527692	0.356764
UDP-glucose 6-dehydrogenase	O60701	UGDH	0.565657	0.356764
ATP synthase subunit delta, mitochondrial	P30049	ATP5D	-0.211266	0.359835
60S acidic ribosomal protein P2	A0A024RCA7;P05387	RPLP2	0.422366	0.359835
Nuclear autoantigenic sperm protein	P49321;Q53H03;B4DS57;Q6PJY7	NASP	0.465305	0.359835
Signal transducing adapter molecule 1	B2RAY1;Q92783;B4DZT2;A6NMU3	STAM	0.705086	0.360796
Microtubule-associated protein 1S;MAP1S heavy chain;MAP1S light chain	A8K940;Q66K74	MAP1S	0.50224	0.360941
Serine/arginine-rich splicing factor 2	J3KP15;Q53FN0;A0A024R8U5;Q01130;J3QL05;B3KUY1;Q8NAK9;B3KX15;Q6NXQ0;Q8N220;B3KVY2;B3KUF7	SRSF2;SFRS2	0.398048	0.361023
Platelet-activating factor acetylhydrolase IB subunit gamma	A0A024R0L6;Q15102;M0R389;M0R1K3	PAFAH1B3	0.437352	0.361872
Heterogeneous nuclear ribonucleoprotein A3	P51991	HNRNPA3	0.500533	0.361872
Early endosome antigen 1	Q15075;A8K7J3	EEA1	0.578951	0.361872
NA	B4DPC0;Q9BSL6	LRRFIP1	0.772466	0.361872
Signal recognition particle 14 kDa protein	P37108;H0YLA2	SRP14	0.388748	0.364404
Pyruvate dehydrogenase E1 component subunit alpha;Pyruvate dehydrogenase E1 component subunit alpha, somatic form, mitochondrial	A0A024RBX9;P08559;Q53GE3;A5YPB6;A5PHJ9	PDHA1;PDHA1/LOC79064	-0.423552	0.364708
Disco-interacting protein 2 homolog B	Q9P265;Q96IB4	DIP2B	0.572359	0.366685
Vacuolar protein sorting-associated protein 26A	B4DLT1;O75436;S4R3Q6	VPS26A	0.826448	0.366836
[Pyruvate dehydrogenase (acetyl-transferring)] kinase isozyme 3, mitochondrial	Q15120	PDK3	-0.876703	0.367022
Translational activator GCN1	E1NZA1;Q92616;A0A024RBS1	PRIC295;GCN1L1	0.541463	0.370474
IST1 homolog	A8K5S3;P53990;H3BQF7;H3BMU1;H3BUI0;B4DLP1;F5GXM3;J3KR23;B4DHF3	IST1	-0.393361	0.373347
40S ribosomal protein S8	Q5JR94;P62241;Q5JR95;Q9BS10	RPS8	0.245101	0.373347
RNA-binding motif protein, X chromosome;RNA-binding motif protein, X chromosome, N-terminally processed	P38159;H3BT71;H0Y6E7;B4E352;B3KRG5;H3BUY5	RBMX	0.27172	0.373347
Charged multivesicular body protein 4b	Q9H444	CHMP4B	0.531607	0.373347
Delta-1-pyrroline-5-carboxylate synthase;Glutamate 5-kinase;Gamma-glutamyl phosphate reductase	P54886	ALDH18A1	0.9461	0.373347
Eukaryotic translation initiation factor 3 subunit D	O15371;B4E1K8	EIF3D	0.474767	0.374366
TSC22 domain family protein 4	Q9Y3Q8;Q8IV54	TSC22D4	0.63066	0.374366
Ribosome-recycling factor, mitochondrial	A0A024R850;Q96E11;X6RDS5;A0A024R855	MRRF	0.340058	0.375754
Trans-2-enoyl-CoA reductase, mitochondrial	Q9BV79;B4DV18;H3BM30	MECR	0.362533	0.378245
Prefoldin subunit 2	B1AQP2;Q9UHV9	PFDN2	0.468471	0.378947
NA	B4DSQ5	NA	0.552995	0.378947
Amine oxidase [flavin-containing] A	Q53YE7;Q53EZ0;P21397;Q49A63;Q5ULA3	MAOA	-1.0609	0.379007
Laminin subunit alpha-1	P25391	LAMA1	-0.669495	0.379007
Transitional endoplasmic reticulum ATPase	V9HW80;P55072;Q96IF9;Q0IIN5;Q9NTC4	HEL-S-70;VCP;DKFZp434K0126	-0.226142	0.379007
Delta-1-pyrroline-5-carboxylate dehydrogenase, mitochondrial	A0A024RAD8;P30038	ALDH4A1	0.277071	0.379007
Insulin-degrading enzyme	P14735;Q59GA5;B7Z7W6;B3KSB8	IDE	0.407042	0.379007
Fibrillin-2	P35556;A0A087WYV8;D6RJI3	FBN2	0.419081	0.379007
Serine/threonine-protein phosphatase;Serine/threonine-protein phosphatase PP1-gamma catalytic subunit	Q9UPN1;F8VYE8;A0A024RBP2;P36873;F8VR82;F8W0W8;A0A087WYY5	PPP1CC	0.637244	0.379007
DnaJ homolog subfamily A member 2	A0A024R6S1;O60884	DNAJA2	0.650497	0.379007
Matrix-remodeling-associated protein 7	P84157	MXRA7	0.552056	0.379229
Importin subunit beta-1	B2RBR9;Q14974;J3KTM9;B7Z752	KPNB1	0.242246	0.379672
5-oxoprolinase	A7E261;O14841	OPLAH	0.306213	0.38076
CDGSH iron-sulfur domain-containing protein 1	A0A024QZN7;Q9NZ45	C10orf70;CISD1	0.213716	0.381702
Leucyl-cystinyl aminopeptidase;Leucyl-cystinyl aminopeptidase, pregnancy serum form	B2RAK1;Q9UIQ6	LNPEP	0.500095	0.383394
Phosphoenolpyruvate carboxykinase [GTP], mitochondrial	Q6IB91;A0A0S2Z430;Q16822;H0YML5;B4DW73;A0A0A0MS74;A0A0S2Z451;H0YM31	PCK2	0.364573	0.383716
Prostaglandin E synthase 3	A0A024RB32;A0A087WYT3;B3KUY2;Q15185;B4DDC6	PTGES3	0.412815	0.384291
Calcium/calmodulin-dependent protein kinase type II subunit delta	D6R938;A0A024RDK3;Q13557;E9PBG7;E9PF82;B7Z2B0;Q4G1A8	CAMK2D	0.227872	0.384471
Tryptophan--tRNA ligase, cytoplasmic;T1-TrpRS;T2-TrpRS	A0A024R6K8;P23381	WARS	0.517803	0.384811
ATPase family AAA domain-containing protein 1	Q8NBU5;B4E2J1	ATAD1	0.45516	0.387275
60S ribosomal protein L28	H0YKD8;P46779;H0YMF4;H0YLP6;Q59F34	RPL28	0.228511	0.388414
Sorting nexin-12	Q3SYF1;A0A087X0R6;Q9UMY4	SNX12	0.504185	0.388414
Bifunctional glutamate/proline--tRNA ligase;Glutamate--tRNA ligase;Proline--tRNA ligase	P07814	EPRS	0.390179	0.39113
DnaJ homolog subfamily C member 11	Q9NVH1;B4DPK2;B4DGD5	DNAJC11	0.339344	0.393223
Poly(rC)-binding protein 2	H3BRU6;F8VZX2;Q15366;B4DRD7	PCBP2	0.411043	0.395435
Saccharopine dehydrogenase-like oxidoreductase	Q8NBX0	SCCPDH	0.317054	0.396683
NADH dehydrogenase [ubiquinone] 1 alpha subcomplex subunit 5	A0A024R745;Q16718;A0A087X1G1;H7BYD0;F8WAS3;C9IZN5	NDUFA5	-0.49998	0.398664
Melanoma-associated antigen D2	A0A024R9Y7;Q9UNF1;B4DX55;Q5H909;Q5H907	MAGED2	0.513105	0.399954
Protein canopy homolog 2	F8W031;F8VXJ7;Q9Y2B0;F8W1K5	CNPY2	0.626773	0.400024
Serine/arginine-rich splicing factor 11	Q05BU6;Q6PJY9;Q6PKC9;Q5T760;Q6PJB9;Q05519;B4DWT1;B4DTC1	SFRS11;SRSF11	-0.517398	0.402672
6-phosphogluconolactonase	A0A0K0K1K7;O95336;M0R261	PGLS	0.36133	0.402672
Peptidyl-prolyl cis-trans isomerase FKBP4;Peptidyl-prolyl cis-trans isomerase FKBP4, N-terminally processed	Q02790;B2R9U2	FKBP4	0.536777	0.402672
Presequence protease, mitochondrial	B4DH07;Q5JRX3;B4DRW8;A0A0A0MRX9;B3KN37;B3KM51	PITRM1	0.874508	0.403532
Serine/threonine-protein phosphatase CPPED1	Q9BRF8	CPPED1	-0.657543	0.404025
Calcineurin B homologous protein 1	A0A024R9M9;Q99653;H0YKE7;F5GX29;H0YNG9;B4DSB5	CHP;CHP1	-0.541537	0.404025
40S ribosomal protein S28	B2R4R9;P62857	RPS28	0.238791	0.404025
Prenylcysteine oxidase 1	Q9UHG3;B7Z8A2;Q584P1;B7Z3Y2;F8W8W4	PCYOX1	0.258407	0.404025
Prostaglandin E synthase 2;Prostaglandin E synthase 2 truncated form	B3KPZ2;Q9H7Z7;A6NHH0;B4DWP1;X6RJ95	PTGES2	0.413501	0.404025
Probable ATP-dependent RNA helicase DDX46	A8K6X3;A0A0C4DG89;Q7L014;D3DQA6	DDX46	0.494972	0.404025
Filamin-A-interacting protein 1	A8K2G7;Q7Z7B0;A0A075B6G6	FILIP1	0.587824	0.404025
NEDD8-activating enzyme E1 catalytic subunit	B2RBP3;Q8TBC4;J3JZZ9;F8W8D4;B7Z5F6	UBA3;UBE1C	0.955122	0.404025
Splicing factor U2AF 65 kDa subunit	P26368;B5BU25;K7ENG2	U2AF2	0.634635	0.4041
60S acidic ribosomal protein P0;60S acidic ribosomal protein P0-like	A8K4Z4;A0A024RBS2;P05388;Q6NSF2;F8VWS0;Q53HW2;Q53HK9;F8VU65;F8VPE8;G3V210;F8VW21;F8VQY6;F8VRK7;F8VZS0;B4E3D5;Q8NHW5;F8VS58	RPLP0;RPLP0P6	0.344715	0.404112
GTP:AMP phosphotransferase AK3, mitochondrial	Q7Z4Y4;Q9UIJ7;Q7Z531	AK3	-0.301512	0.404552
U6 snRNA-associated Sm-like protein LSm3	P62310;B2R5H5	LSM3	0.451998	0.40586
Transcriptional activator protein Pur-alpha	Q2NLD4;Q2NLC9;Q56A79;Q00577	PURA	-0.590254	0.406357
Coatomer subunit beta	P53618;E9PP73	COPB1	0.401611	0.406357
116 kDa U5 small nuclear ribonucleoprotein component	B3KX19;Q6IBM8;Q15029;Q8IXJ3;A8KAP3;B4DZB1;B3KWY2	U5-116KD;EFTUD2;SNRP116	0.461461	0.406357
Eukaryotic translation initiation factor 3 subunit A	J9R021;Q14152;Q24JU4;Q7Z5T5;Q6P1R0	eIF3a;EIF3A	0.518665	0.406357
NA	B7Z4U9;Q59HE3;B2RCJ7;B7Z5T6;A8K8C4;Q15786	NA	0.257972	0.407178
Glutamine--fructose-6-phosphate aminotransferase [isomerizing] 1	Q06210	GFPT1	0.598069	0.407178
Acyl-protein thioesterase 2	A0A140VJC9;O95372;Q5QPQ1;Q5QPQ0;Q5QPQ3;Q5QPQ2	LYPLA2	0.726586	0.407768
NA	C9JWC3	SORBS2	-0.410179	0.407925
Acyl carrier protein, mitochondrial;Acyl carrier protein	O14561;H3BNK3	NDUFAB1	-0.395734	0.407925
Leucine--tRNA ligase, cytoplasmic	B4E266;B2RCM2;Q9P2J5;B4DER1;Q9H8E3	LARS	0.311553	0.407925
Pantothenate kinase 4	Q9NVE7;A0A0G2JR38;B4DHW9;E9PHT6;B4DZX1;Q7RTX2	PANK4	0.40735	0.407925
Ras-related protein Rab-13	Q504R6;P51153;D3DV69;A0A024RB27	RAB13;hCG_1996054;hCG_24991	0.455659	0.407925
Mitochondrial carrier homolog 2	Q9Y6C9;Q53G34	MTCH2	0.402917	0.408432
X-ray repair cross-complementing protein 6	A0A024R1N4;P12956;B1AHC9;B2RDN9;B4DE32;B4E356	XRCC6	0.476392	0.408432
Vacuolar protein-sorting-associated protein 25	K7EKV4;A0A024R1X3;Q9BRG1	VPS25	0.56711	0.408432
14-3-3 protein eta	A0A024R1K7;Q04917;Q9H4N8;A2IDB2	YWHAH	0.552155	0.408992
14 kDa phosphohistidine phosphatase	V9HWC4;Q9NRX4;Q6FIE5	HEL-S-132P;PHPT1;PHP14	0.294329	0.409517
Bone morphogenetic protein 5	M9VUD0;A8K694;P22003	BMP5	0.643986	0.409517
60S ribosomal protein L14	P50914	RPL14	0.490608	0.409807
Keratin, type I cytoskeletal 9	CON__P35527;P35527;K7EQQ3	KRT9	0.492264	0.409807
Ubiquitin-associated protein 2-like	B4DYY5;F8W726;Q14157;B4DZJ6;Q5VU77	UBAP2L	0.568916	0.409807
Cytochrome c oxidase subunit 3	A0A075X871;A0A059QTG6;H9E795;A0A075X6R4;H9E7H3;H9E7J9;B4YCG0;T1Q6R9;T1Q5Q2;T1Q5P3;T1Q5B9;S4T6M3;Q9B2X0;Q9B2W9;Q9B2U6;Q9B1S6;Q9B1S4;Q8WCY1;Q8HNQ7;Q85L10;Q85L04;Q85KZ1;Q85KW2;Q85KW0;Q7YEF1;Q7YCF3;Q7YCE5;Q7YCE0;Q7YCC7;Q7Y664;Q6WQG6;Q6WQA1;Q6RRW7;Q6RPE6;Q6RMU0;Q6RLY3;Q6R0W6;Q6R0Q1;Q5SB31;Q5SAG0;Q4F2U0;Q4F2A8;Q4F1I5;Q4F0P9;Q4EZD1;Q4EXJ4;Q305X3;Q305K6;Q305I0;Q27H55;Q15IP0;Q15II8;Q0G899;I6N522;F1AKZ3;E0…	COX3;COIII;CO3;coxIII;MT-CO3	0.406453	0.409872
NA	F8W7C6;H7C123;H7C2C5	RPL10	0.297614	0.410003
Lanosterol 14-alpha demethylase	B3KRC6;A0A0C4DFL7;Q16850;Q05D40	CYP51A1	0.656205	0.412089
Elongation factor 2	P13639;Q8TA90;B4DPU3;Q6PK56	EEF2	0.216163	0.413522
Microsomal glutathione S-transferase 3	Q53GB9;A0A024R8Z1;Q5VV89;O14880;Q5VV87	MGST3	0.504602	0.413522
Septin-8	B7ZVZ1;A6NMH6;A6NFQ9;F8W8I8;Q92599;A0A087X142	43351	0.533223	0.413522
Latent-transforming growth factor beta-binding protein 1	Q14766;E7EV71;B7ZLY3	LTBP1	0.47413	0.413677
Epidermal growth factor receptor substrate 15-like 1	A0A024R7G6;M0R165;A8K5P4;Q9UBC2;A5PKY0;B4DME4;B4DQX5;M0R2S2	EPS15L1	-0.649207	0.413908
Flotillin-2	A0A024QZ62;Q14254;Q6FG43;E7EMK3;J3QLD9;Q9BTI6;K7EKW9	hCG_1998851;FLOT2	0.25575	0.414217
Guanine nucleotide-binding protein G(I)/G(S)/G(O) subunit gamma-12;Guanine nucleotide-binding protein subunit gamma	Q9UBI6;Q53GD1	GNG12	-0.447839	0.415403
Phospholipase D3	A0A024R0Q4;Q8IV08;B4DEL6	PLD3	0.449599	0.419676
Peroxiredoxin-2	V9HW12;P32119;B4DF70;A6NIW5	HEL-S-2a;PRDX2	0.198386	0.420448
26S protease regulatory subunit 4	Q53XL8;Q53HB3;P62191	PSMC1	0.306293	0.420448
Procollagen-lysine,2-oxoglutarate 5-dioxygenase 1	A0A024R4H0;Q02809;B2R5M9;B4DGN8;B4DHT1	PLOD1	0.484728	0.420761
Transportin-1	A0A024RAM0;Q92973	TNPO1	0.463465	0.422704
Rap1 GTPase-GDP dissociation stimulator 1	P52306;B3KNU0;B7Z2V8;B7Z4M5;Q6U7G8	RAP1GDS1	0.373541	0.4255
Serine-threonine kinase receptor-associated protein	Q9Y3F4;B0AZV0	STRAP	-0.350156	0.425594
Midkine	E9PPJ5;E9PLM6;P21741	MDK	0.280249	0.425594
U2 small nuclear ribonucleoprotein B	P08579;B5BTZ8	SNRPB2	0.416058	0.425594
Cell division cycle 5-like protein	B4DSH1;B3KY60;Q99459	CDC5L	0.653845	0.425594
Pre-mRNA-processing factor 40 homolog A	O75400;B4DPY2;Q4ZG51	PRPF40A;FNBP3	-0.779159	0.425687
DCC-interacting protein 13-alpha	Q9UKG1;B4DQX8	APPL1	-0.764457	0.425774
26S protease regulatory subunit 7	A0A140VK70;P35998;Q75L23	PSMC2	0.210718	0.425774
U6 snRNA-associated Sm-like protein LSm8	A4D0W0;O95777;F2Z2Y6;C9JIZ0;C9JNV3	LSM8	0.575144	0.427281
28 kDa heat- and acid-stable phosphoprotein	Q13442	PDAP1	-0.524986	0.429322
Splicing factor 3B subunit 6	Q9Y3B4	SF3B6	0.388685	0.429324
Inorganic pyrophosphatase 2, mitochondrial	Q9H2U2;B4DR66;D6R967	PPA2	0.428948	0.429421
Paralemmin-1	B2RCL4;A0A024R1Y6;O75781;A0A024R207;B7Z649;B3KMX3	PALM	0.491815	0.429421
COP9 signalosome complex subunit 8	E9PGT6;B2R8N1;A0A024R4D1;Q99627;H7C3S9	COPS8	0.606544	0.429421
39S ribosomal protein L53, mitochondrial	Q96EL3	MRPL53	0.403834	0.432268
Tropomyosin alpha-3 chain	P06753;Q8NAH0	TPM3;HEL-S-82p	-0.692415	0.433509
Succinyl-CoA ligase subunit beta;Succinyl-CoA ligase [ADP-forming] subunit beta, mitochondrial	E5KS60;Q9P2R7;Q6N0B1;Q5T9Q5	SUCLA2;DKFZp686D0880	-0.222566	0.433509
Phosphoribosyl pyrophosphate synthase-associated protein 1	A0A024R8M4;Q14558;B4DP31	PRPSAP1	0.415453	0.433509
Phosphoglycerate mutase 2;Phosphoglycerate mutase	P15259;A4D2J6	PGAM2	0.505972	0.433509
Programmed cell death 6-interacting protein	Q8WUM4;Q4W4Y1;B4DHD2;B7Z5C1	PDCD6IP;DRIP4	0.25957	0.433874
Heat shock protein beta-1	V9HW43;P04792;B4DL87	HEL-S-102;HSPB1	-0.200331	0.434018
Eukaryotic translation initiation factor 4H	Q15056;Q75MU1;B4DMV6;Q75MU2;A4D198	EIF4H;WBSCR1;LOC392647	0.384307	0.434018
Mitochondrial fission 1 protein	Q9Y3D6	FIS1	0.824155	0.434018
Serine/threonine-protein kinase MARK2	A0A140VJP1;E9PC69;Q7KZI7;A0A024R5B2;E7ETY4;A9CP04;A8K2S4;A0A024R555;F5H4F6	MARK2;Par1b	0.597782	0.434272
2-oxoisovalerate dehydrogenase subunit alpha, mitochondrial	Q59EI3;B2R8A9;A0A024R0K3;Q6ZSA3;F5H5P2;P12694;F5GXU9;Q658P7	BCKDHA;DKFZp313C0640	0.305747	0.434468
Trifunctional enzyme subunit alpha, mitochondrial;Long-chain enoyl-CoA hydratase;Long chain 3-hydroxyacyl-CoA dehydrogenase	E9KL44;P40939;B4DRH6;B4DDZ5	HADHA	-0.155729	0.434671
ATP-binding cassette sub-family E member 1	P61221;D6R9I9	ABCE1	0.455163	0.437983
Ras-related protein Rab-2A	A0A024R7V6;P61019;A0A0A1HAW1;E9PKL7	RAB2;RAB2A	0.240204	0.438066
Cathepsin D;Cathepsin D light chain;Cathepsin D heavy chain	A0A1B0GW44;A0A1B0GVD5;A0A1B0GWE8;V9HWI3;P07339;A0A1B0GV23;A0A1B0GVP3;H7C469;H7C1V0	HEL-S-130P;CTSD	-0.356532	0.438729
COP9 signalosome complex subunit 2	Q53HJ0;Q59EL2;P61201;B2R6N0;B4DIH5;H0YKU5	COPS2	0.55966	0.438875
Sodium/calcium exchanger 1	P32418;E7EV41	SLC8A1	0.276055	0.441742
Phenylalanine--tRNA ligase beta subunit	Q9BR63;Q9NSD9;A8K666;B7ZB32	FARSB	0.364067	0.441782
Histone H1.5	P16401	HIST1H1B	-0.313331	0.442375
Retinol dehydrogenase 13	A0A024R4M8;Q8NBN7;B2RDH1;G8JLA1	RDH13	0.326593	0.442375
Lethal(2) giant larvae protein homolog 1	A0A087WW77;Q15334;A0PJG1	LLGL1	-0.646111	0.442987
Keratin, type II cytoskeletal 2 epidermal	CON__P35908;P35908	KRT2	0.376312	0.442987
Cold shock domain-containing protein E1	Q9GZV0;A0A024R0K2;A0A024R0E2;O75534;Q96L66;E9PLT0	CSDE1;UNR	0.417257	0.443062
U5 small nuclear ribonucleoprotein 200 kDa helicase	O75643;A4FU77	SNRNP200	0.447373	0.443062
Beta-adducin	Q05DK5;P35612	ADD2	-0.564343	0.444573
NADH dehydrogenase [ubiquinone] 1 alpha subcomplex assembly factor 3	Q9BU61	NDUFAF3	-0.370622	0.444573
SWI/SNF complex subunit SMARCC2	Q59G16;F8VXC8;A0A024RB22;Q8TAQ2;B4DF22	SMARCC2	0.397246	0.444573
Protein VAC14 homolog	Q08AM6;B4DMP4	VAC14	0.429249	0.444573
Mitochondrial import inner membrane translocase subunit Tim9	A0A024R648;Q9Y5J7;G3V502;G3V2F3	TIMM9	-0.327251	0.446438
Mitochondrial import inner membrane translocase subunit TIM50	Q0VAB1;A0A024R0M6;Q3ZCQ8;M0R0C3;M0R2F8	TIMM50	0.608072	0.447967
Glutathione reductase, mitochondrial	V9HW90;P00390	HEL-75;GSR	0.28385	0.448266
Probable leucine--tRNA ligase, mitochondrial	Q15031;E9PHM2	LARS2	0.509089	0.448331
NA	S4R3H4;B4DQZ7	ACIN1	-0.611092	0.449354
NA	A0A0D9SGF6;B4DGT1	SPTAN1	0.163543	0.450778
Serine/arginine-rich splicing factor 4	A0A0D9SEM4;Q53F45;A8K644;Q08170;Q59EF5;B4DEM8	SRSF4;SFRS4	0.425225	0.450921
Iron-sulfur protein NUBPL	X5D2R5;Q8TB37;X5D995;X5DR74;F8W061;B4DWB0;H0YHR7	NUBPL	-0.378487	0.451604
V-type proton ATPase subunit a;V-type proton ATPase 116 kDa subunit a isoform 1	Q53X12;Q93050;Q53ET5;Q5CZH6;B7Z641;B7Z2A9;K7EM24;K7EN36	ATP6V0A1;DKFZp686N0561	0.511535	0.451604
Echinoderm microtubule-associated protein-like 1	F8W717;B7Z650;B3KXA3;O00423	EML1	0.424122	0.452806
Coiled-coil domain-containing protein 127	Q96BQ5	CCDC127	-1.2425	0.45324
Ubiquitin carboxyl-terminal hydrolase isozyme L3;Ubiquitin carboxyl-terminal hydrolase	A0A140VJZ4;P15374;A0A087WTB8;Q5TBK7	UCHL3	-0.47838	0.45324
Rab GTPase-binding effector protein 1	Q15276;B4DMM4;Q05BX6	RABEP1	0.381259	0.45324
Tyrosine-protein phosphatase non-receptor type;Tyrosine-protein phosphatase non-receptor type 1	A8K3M3;P18031;B4DSN5	PTPN1	0.435405	0.45324
GTPase-activating protein and VPS9 domain-containing protein 1	A0A024R862;A0A024R8A2;Q14C86;F8W9S7;A0A024R875;B3KN67;C9IZ08;B4DK42	GAPVD1	0.601159	0.45324
Methylmalonyl-CoA mutase, mitochondrial	A0A024RD82;P22033;T1WHH0;B2R6K1;A0A0S2Z4X4	MUT	0.264907	0.453676
NA	L0R512	NCAM2	0.270095	0.453676
AP-2 complex subunit mu	A0A087WY71;E9PFW3;B4DNB9;Q96CW1;B4DJB1;B4DFM1;B4E304;C9JJ47;B4DTI4;B7Z4N2	AP2M1	0.77965	0.453676
Microfibrillar-associated protein 5	B3KW70;F5GYX4;H0YG03;A8K3H0;Q13361;H0YGS3	MFAP5	1.39606	0.454051
Profilin	D3DNI2;C9J0J7;G5E9Q6;B4DNH1;D3DNI3	PFN2	-0.567229	0.454321
Eukaryotic translation initiation factor 3 subunit K	Q9UBQ5;K7ES31;K7ERF1;B4DVD7;K7EQM4;U3LUI4;A0A087WVB9	EIF3K	0.360588	0.457324
Ras-related protein Rab-21	A0A024RBA9;Q9UL25;Q96GX3	RAB21	0.440721	0.458604
Regulator of microtubule dynamics protein 1	Q96DB5;H0YB03;H0YB83;E5RH53	RMDN1	0.496046	0.458604
Mitochondrial import inner membrane translocase subunit Tim13	Q9Y5L4;K7EIT2	TIMM13	0.529621	0.458604
DNA helicase;DNA replication licensing factor MCM5	Q53FG5;B1AHB0;A8K521;P33992;B1AHB1;B4DQ39;B3KVF0;B4DVK5	MCM5	-0.513693	0.459416
EPM2A-interacting protein 1	Q7L775	EPM2AIP1	0.4968	0.459416
Eukaryotic translation initiation factor 4 gamma 1	B4DSI9;B4DGF1;B2RU10;B2RU06;Q4LE58;Q04637;Q96I65	EIF4G1;EIF4G1 variant protein	-0.418093	0.460181
NA	Q5CZI2	DKFZp686D12108	0.444062	0.462211
Heat shock protein 105 kDa	A0A024RDQ0;A0A024RDS1;Q92598;B4DF68;B4DY72	HSPH1	0.481956	0.462211
Annexin;Annexin A7	B2R657;B4DT77;B4DWU2;B4DHY4;Q53HM8;P20073;B2R7L2	ANXA7	-0.344423	0.463801
Ubiquitin carboxyl-terminal hydrolase 47	Q96K76	USP47	0.492098	0.463801
NA	A0A0J9YYJ7;A0A0J9YW50;A0A0J9YY01	NA	-0.25747	0.463819
Protein NipSnap homolog 2	O75323	GBAS	0.331506	0.464343
Spondin-1	Q9HCB6	SPON1	0.414868	0.464481
ADP-ribosylation factor-like protein 1	P40616;F8VYN9;B4DZG7;B4DR16	ARL1	0.205372	0.46551
Nuclear pore complex protein Nup93	Q8N1F7;A8K897;H3BVG0	NUP93	-0.484885	0.466649
Aspartate aminotransferase, cytoplasmic;Aspartate aminotransferase	A0A140VK69;P17174;Q2TU84;B7Z1I2	GOT1;GIG18	-0.316257	0.46725
Carbonyl reductase family member 4	Q8N4T8;H0Y962	CBR4	0.459511	0.468954
Barrier-to-autointegration factor;Barrier-to-autointegration factor, N-terminally processed	A0A024R5H0;O75531;B2R4V4	BANF1	0.753563	0.468954
Endoplasmic reticulum-Golgi intermediate compartment protein 1	B4E0N6;Q969X5	ERGIC1	-0.511155	0.470148
Acylpyruvase FAHD1, mitochondrial	Q6P587	FAHD1	0.289382	0.47193
Phosphatidylinositide phosphatase SAC1	Q9NTJ5;E9PGZ4;B4DVV3	SACM1L	0.430284	0.472265
Pentatricopeptide repeat domain-containing protein 3, mitochondrial	Q96EY7;B2RDU4	PTCD3	0.279305	0.474046
Polyribonucleotide nucleotidyltransferase 1, mitochondrial	Q8TCS8	PNPT1	0.527972	0.474046
DnaJ homolog subfamily C member 7	Q99615;B7Z9W6;Q59EH7;A8K4T2;K7EPP7;K7ESP1;K7EIH8	DNAJC7	-0.703119	0.474449
Ribosomal protein S6 kinase alpha-3	B4DKZ2;B4DG22;B7ZB17;P51812	RPS6KA3	0.450519	0.474449
Leiomodin-1	B3KX20;B4E3F8;B4E3S9;B4DIX9;P29536	LMOD1	0.337242	0.474862
Peripheral plasma membrane protein CASK	B7ZKY2;O14936;Q5JS74	CASK	0.550543	0.475719
Treacle protein	Q13428;Q59FZ2	TCOF1	0.387506	0.475826
Drebrin	Q16643;D6R9W4;B3KSQ7	DBN1	0.443543	0.475826
O-acetyl-ADP-ribose deacetylase MACROD1	Q9BQ69	MACROD1	0.534402	0.47614
C-terminal-binding protein 1	X5D8Y5;Q13363;Q4KMQ8;X5D7T7;D6RAX2;E7ESU7;E7EPF8	CTBP1	-0.537835	0.476303
Alpha-crystallin B chain	V9HW27;P02511;E9PR44;A0A140G961;C3VMY8;A0A024R3B9;E9PNH7	HEL-S-101;CRYAB	-0.390227	0.476487
Eukaryotic translation initiation factor 1	Q6IAV3;K7EM18;P41567	SUI1;EIF1	0.291475	0.476487
Phosphoribosyl pyrophosphate synthase-associated protein 2	B2R7R5;A0A024QYY3;O60256;I3L0S1;E7EPA1;C9K0K7;C9JJS3	PRPSAP2	0.442066	0.476534
NA	A0A024R884;Q4LE33	TNC;TNC variant protein	-0.663291	0.476944
Protein kinase C and casein kinase substrate in neurons protein 2	Q6FIA3;A0A0U1RR22;Q9UNF0;A0A024R4X1;B0QYG7;B0QYG8	PACSIN2	0.387991	0.476944
Glucosamine-6-phosphate isomerase 1;Glucosamine-6-phosphate isomerase	P46926;B3KMV2;A8K3S1;D6RFF8;D6R9P4;D6RAY7	GNPDA1	0.536224	0.47747
S-phase kinase-associated protein 1	E5RJR5;P63208;E7ERH2;F8W8N3	SKP1	-0.693604	0.478401
Bcl-2-like protein 13	Q9BXK5;A0A087WX97;A0A087WTL4;E9PDD6;B2RB43	BCL2L13	-0.408662	0.478401
Isoleucine--tRNA ligase, mitochondrial	Q9NSE4;A8K5W7	IARS2	0.17947	0.478401
CDGSH iron-sulfur domain-containing protein 2	Q8N5K1;I3L1N9	CISD2	0.348355	0.478401
Signal recognition particle receptor subunit beta	Q549N5;Q9Y5M8;H7C4H2	SRPRB	0.491343	0.478401
Guanine nucleotide-binding protein G(o) subunit alpha	A0A142CHG9;P09471;Q8N6I9;B3KP89;H3BTM2;H3BN82	GNAO1	0.706741	0.478401
40S ribosomal protein SA	C9J9K3;A0A024R2P0;A0A0C4DG17;P08865;Q96RS2;A0A024R7P5;F8WD59	RPSA;LOC388524	0.207165	0.478888
RNA-binding protein with multiple splicing	D3DSV0;B4E3T4;Q93062;Q569H2;H0YBU9	hCG_2043421;RBPMS	0.412232	0.480438
GTP-binding protein 1	A0A024R1S5;O00178;B2RDW9	GTPBP1	0.460145	0.480897
Sodium/potassium-transporting ATPase subunit beta-2	P14415;I3L3J8	ATP1B2	-0.497311	0.482278
Thyroid hormone receptor-associated protein 3	Q9Y2W1	THRAP3	0.48027	0.484879
Myosin-13	Q9UKX3	MYH13	-0.718155	0.486303
Small nuclear ribonucleoprotein G;Putative small nuclear ribonucleoprotein G-like protein 15	Q49AN9;F5H013;P62308;A8MWD9	SNRPG;SNRPGP15	0.311924	0.486788
60S ribosomal protein L31	B2R4C1;P62899;H7C2W9;C9JU56;B7Z4E3;B7Z4C8;B8ZZK4	RPL31	-0.356759	0.488175
Creatine kinase B-type	V9HWH2;V9HW77;P12277;A0A0S2Z471;B4DP56;G3V4N7	HEL-S-29;HEL-211;CKB	0.347874	0.490061
Tubulin-specific chaperone A	E5RIW3;Q6FGD7;E5RJD8;O75347;E5RHG6	TBCA	-0.3183	0.490157
E3 ubiquitin-protein ligase MARCH5	Q9NX47	43164	0.361681	0.49128
NA	A0A024R674	SPTB	-0.338784	0.49161
ATP synthase subunit O, mitochondrial	P48047;Q53HH2;H7C0C1	ATP5O	-0.215367	0.492347
Protein LYRIC	A0A024R9D2;Q86UE4;E5RJU9	MTDH	0.461385	0.492903
Striatin	O43815;Q3B874	STRN	0.494982	0.495302
A-kinase anchor protein SPHKAP	Q2M3C7	SPHKAP	0.425287	0.49535
Translocation protein SEC63 homolog	B3KNE7;B3KQF0;A0A0S2Z5M1;Q9UGP8;B3KWU4	SEC63	-0.34625	0.495444
Striated muscle preferentially expressed protein kinase	Q15772	SPEG	0.725654	0.495444
V-type proton ATPase subunit d 1	B2R7M1;F5GYQ1;P61421;R4GN72;B7Z6L9;J3QL14;B7Z788	ATP6V0D1	0.303011	0.497057
Golgi integral membrane protein 4	O00461;F8W785	GOLIM4	0.7323	0.497584
Erythrocyte band 7 integral membrane protein	A0A024R882;P27105;B4E2V5;B4DZK8	STOM	0.325583	0.498512
Endothelial differentiation-related factor 1	O60869	EDF1	-0.573385	0.498632
Probable ATP-dependent RNA helicase DDX5	B4DN41;J3KTA4;P17844;B5BUE6;B4DNG2;Q7Z2V5;Q59E92	DDX5;DKFZp686J01190	0.303798	0.498945
Interferon-induced GTP-binding protein Mx1;Interferon-induced GTP-binding protein Mx1, N-terminally processed	P20591;F8W8T1;Q8NAA8	MX1	0.607652	0.500259
Fragile X mental retardation protein 1	R9WQY1;A8MQB8;G3V0J0;X5D907;R9WPL0;A0A087WXI3;X5DQX7;Q06787;R9WNI0;W5ZQ92;Q59GC1;A0A0K0MJ24;Q8IXW7	FMR1	0.596911	0.500974
NADH dehydrogenase [ubiquinone] 1 beta subcomplex subunit 11, mitochondrial	Q7Z4X2;Q9NX14	NDUFB11	-0.371007	0.501053
mRNA export factor	P78406;Q5J8M4;E9PQ57;E9PPG9	RAE1	0.298272	0.501053
Cysteine and glycine-rich protein 1	B4DY28;P21291;Q9BTA4;B3KVC9;Q6ZMS3;B4E2T4;E9PND2;E9PS42;Q59EQ5;E9PP21;Q6AI18	CSRP1;DKFZp686M148	0.635641	0.501355
Nuclear cap-binding protein subunit 1	A0A024R179;Q09161	NCBP1	0.255776	0.503016
Ras-related protein Ral-B	A0A024RAG3;P11234;C9J6B1;C9JQB3;B4E364	RALB	0.274926	0.505413
EMILIN-2	Q9BXX0	EMILIN2	0.296812	0.505413
D-dopachrome decarboxylase;D-dopachrome decarboxylase-like protein	Q53Y51;P30046;B4DJQ7;J3KQ18;A0A0F7RPW6;B5MC82;B4E259;A6NHG4	DDT;DDTL	0.326255	0.505413
Succinate dehydrogenase [ubiquinone] cytochrome b small subunit, mitochondrial	Q6UWH2;A0A0S2Z4J3;O14521;H0YD96;H0YD41;G3V173;E9PK73;H3BRW5	UNQ5809;SDHD	0.35756	0.505413
Protein arginine N-methyltransferase 5;Protein arginine N-methyltransferase 5, N-terminally processed;Protein arginine N-methyltransferase 5	O14744;B2RDD7;G3V580;B4DV00	PRMT5	0.499472	0.505413
Muscular LMNA-interacting protein	Q5VWP3;E2QRH6	MLIP	-0.338566	0.505815
Acyl-coenzyme A thioesterase 1	E9KL42;Q86TX2;B4DV16;A1L172;G3V4F2;B7ZMC1	ACOT1	-0.291239	0.508637
RNA-binding protein Musashi homolog 2	B4DHE8;Q96DH6;B4DM51	MSI2	0.425368	0.508637
Translationally-controlled tumor protein	A0A0P1J1R0;Q5W0H4;A0A0B4J2C3;P13693;J3KPG2;E9PJF7;Q9UP43;B4DKJ4;B4DLD6	TPT1	0.82654	0.509886
NA	CON__P02769	NA	0.354314	0.51034
Importin subunit alpha;Importin subunit alpha-7	B4DII5;B4DWX3;O60684;Q5TFJ7	KPNA6	-0.363423	0.513044
Transcription elongation factor B polypeptide 2	Q15370;B8ZZU8;I3L0M9;A0A0B4J296	TCEB2	-0.254852	0.513044
39S ribosomal protein L39, mitochondrial	Q9NYK5	MRPL39	0.252941	0.513044
Protein AHNAK2	Q8IVF2	AHNAK2	0.545532	0.513044
Transmembrane and TPR repeat-containing protein 3	A8K321;B4DZ55;Q6ZXV5	TMTC3	0.383698	0.513565
Translation initiation factor IF-2, mitochondrial	P46199;Q6P1N2;Q8IWH1	MTIF2	-0.351963	0.516305
S-adenosylmethionine synthase;S-adenosylmethionine synthase isoform type-2	B4DEX8;A0A140VJP5;P31153	MAT2A	-0.230756	0.516305
CD59 glycoprotein	E9PNW4;Q6FHM9;E9PR17;P13987	CD59	0.285864	0.516305
Collagen alpha-3(VI) chain	D9ZGF2;P12111	COL6A3	0.651617	0.517007
Acyl-coenzyme A oxidase;Peroxisomal acyl-coenzyme A oxidase 3	B2R856;O15254	ACOX3	0.339453	0.518991
Eukaryotic translation initiation factor 5A;Eukaryotic translation initiation factor 5A-1;Eukaryotic translation initiation factor 5A-1-like	I3L397;I3L504;P63241;Q6IS14	EIF5A;EIF5AL1	-0.426306	0.519833
Prolyl 4-hydroxylase subunit alpha-1	P13674;Q5VSQ6	P4HA1	0.441868	0.521036
Electron transfer flavoprotein-ubiquinone oxidoreductase, mitochondrial	Q547S8;Q16134;B4DEQ0;A7UNU5	ETFDH	0.333742	0.52265
Myosin-14	Q7Z406	MYH14	0.310977	0.523111
Microtubule-associated tumor suppressor candidate 2	J3KQA9;Q5JR59;B4DYN0	MTUS2	0.334834	0.523111
Nephronectin	D6RH31;Q6UXI9;H0YAK9	NPNT	0.41697	0.524043
Blood vessel epicardial substance	Q8NE79	BVES	-0.447645	0.525047
Acylamino-acid-releasing enzyme	A0A024R2U9;C9JIF9;P13798;H7C393	APEH	0.280302	0.525047
Ras-related protein Rab-14	A0A024R845;P61106;X6RFL8	RAB14	0.376141	0.527548
Thioredoxin-dependent peroxide reductase, mitochondrial	P30048;Q53HC2	PRDX3	0.171424	0.528086
Thioredoxin domain-containing protein 17	A0A140VJY7;Q9BRA2;I3L0K2;I3L3M7;I3L2R6	TXNDC17	0.207042	0.528086
Cofilin-1	V9HWI5;P23528;G3V1A4;E9PP50;E9PK25;E9PQB7;B4E112;E9PLJ3;E9PS23	HEL-S-15;CFL1	0.209972	0.528086
Golgi apparatus protein 1	Q92896;H3BM42	GLG1	0.345901	0.528086
Striatin-3	Q13033;A0AV58	STRN3	0.389547	0.528086
Muscle-related coiled-coil protein	Q5BKX8	MURC	0.48604	0.528086
Peptidyl-prolyl cis-trans isomerase FKBP8	B2R8G6;A0A024R7P2;Q14318;B7Z6M0;U3KQ64;A0A0A0MTJ1	FKBP8	0.502647	0.530846
Ubiquitin-fold modifier 1	P61960;H0Y614	UFM1	-0.2915	0.531113
Keratin, type I cytoskeletal 10	CON__P13645;P13645	KRT10	0.359582	0.531661
3-ketoacyl-CoA thiolase, peroxisomal	Q8NCW8;B4DEN6;A0A024R2M6;P09110;H7C131;C9JDE9;A0A140VJX0;H0Y4D4	ACAA1	-0.28444	0.532286
Protein transport protein Sec31A	A0A024RDD3;D6REX3;O94979;A0A024RDH6;D6RHZ5;H7BXG7	SEC31L1;SEC31A	0.326888	0.532286
Ubiquitin-conjugating enzyme E2 K	B4DIZ2;P61086;D6RDM7	UBE2K	0.628829	0.533993
Glutamate dehydrogenase;Glutamate dehydrogenase 1, mitochondrial;Glutamate dehydrogenase 2, mitochondrial	B4DMF5;E9KL48;P00367;B4E0N9;Q53GW3;B4DMG8;B3KT18;A0A140VK14;P49448	GLUD1;GLUD2	0.158638	0.535839
Macrophage migration inhibitory factor	I4AY87;P14174	MIF	0.252543	0.535839
Signal recognition particle subunit SRP68	Q9UHB9;B4DVI7;B3KMI9;Q96K98	SRP68	0.583189	0.535839
Transmembrane protein 14C	Q53F27;A0A024R001;Q9P0S9	TMEM14C	0.586678	0.535839
Sorting nexin-5	Q9Y5X3;Q5QPE4;Q53FH8;Q6P5V6;Q5QPE5;B7Z476	SNX5	-0.641722	0.536682
Ankyrin-3	Q12955;Q59G01	ANK3	0.277553	0.53754
Ras-related protein Rab-5C	A0A024R1U4;P51148;K7ERI8;F8VVK3;K7ENY4	RAB5C	0.707318	0.53754
Synaptopodin-2	H0Y9Y3;B9EG60;Q9UMS6	SYNPO2	-0.452391	0.537906
NA	D3DPG0;A0A0A0MTS7	TTN	-0.238563	0.537906
Translin	E9PGT1;Q15631;H7C1D4;Q53GR3;B3KRM8;B7Z5D9	TSN	0.279802	0.537906
Nexilin	Q0ZGT2;D3DQ79;H7BXY5;B4DDI0	NEXN	0.299809	0.537906
Fragile X mental retardation syndrome-related protein 2	P51116	FXR2	0.336376	0.539127
Endophilin-B1	A0A140VJU5;A0A087WW40;Q9Y371	SH3GLB1	0.299682	0.539198
Zinc transporter SLC39A7	B4DZZ8;B4DVK8;A0A024RCX7;Q92504	SLC39A7	-0.92997	0.540222
Nuclear migration protein nudC	Q9Y266;Q9H2R7;A0A0A0MSU9	NUDC;NPD011	0.521866	0.54226
Epoxide hydrolase 1	R4SBI6;P07099;Q6FGZ3	EPHX1	0.243455	0.542382
Acetyl-CoA acetyltransferase, cytosolic	A8K4W5;Q59GW6;Q9BWD1	ACAT2	0.455257	0.54256
Pyridoxal phosphate phosphatase	A0A024R1I3;Q96GD0	PDXP	-0.252977	0.543015
Serine/threonine-protein kinase 26;Serine/threonine-protein kinase 25	Q8NBY1;Q499L9;B4E0Y9;Q9P289;Q9NWX4;C9JDH9;C9J6L2;C9JCC0;C9J232;H7C279;Q5CZ67;B4E185;B3KRS6;A0A0S2Z4Y2;B4DVS7;Q96BA2;A0A024R4B2;O00506	STK26;MST4;STK25;DKFZp686J1430	-0.551169	0.543138
Cytochrome b-c1 complex subunit 9	Q9UDW1	UQCR10	0.230187	0.545586
COP9 signalosome complex subunit 1	Q13098;C9JFE4;B4DND6;A0A096LPJ3;A0A096LP07;A8K070	GPS1	0.379441	0.545939
FUN14 domain-containing protein 2	Q9BWH2	FUNDC2	0.327898	0.546432
Tropomodulin-1	P28289	TMOD1	0.224861	0.54719
Transmembrane emp24 domain-containing protein 7	A0A0A6YYA0;Q9Y3B3;B4E2C1;Q3B7W7	TMED7-TICAM2;TMED7	0.604769	0.54719
Cytochrome c oxidase subunit 5A, mitochondrial	P20674;H3BRM5;H3BV69;H3BNX8	COX5A	0.31559	0.547982
Alpha-2-macroglobulin receptor-associated protein	B2R6S9;P30533;A8K8F6	LRPAP1	-0.421665	0.548138
Phenylalanine--tRNA ligase alpha subunit	Q6IBR2;Q9Y285;K7ER00;K7ER16;K7EPH2	FARSLA;FARSA	0.374251	0.548249
Syntaxin-4	Q12846;B7Z425;C9JFM5	STX4;STX4A	0.398474	0.548249
Metaxin-1	A0A0A0MRK6;Q13505	MTX1	0.43167	0.548249
Laminin subunit beta-1	G3XAI2;P07942;Q8TAS6	LAMB1	-0.250618	0.551533
NEDD8	E9PL57;F8VSA6;E9PS38;S4R3E9;Q15843	NEDD8-MDP1;NEDD8	-0.363769	0.553432
Nucleoside diphosphate kinase;Nucleoside diphosphate kinase B	Q32Q12;Q6FHN3;J3KPD9;P22392;E7ERL0	NME1-NME2;NME2;NME1	0.301981	0.553432
Protein transport protein Sec24C	G5EA31;A0A024QZM6;P53992;B4DSN3	SEC24C	0.430932	0.553432
Transmembrane protein 205	K7ELQ9;A0A024R7D3;Q6UW68;K7ER05;K7EJQ9;K7EM09;K7EPR0	TMEM205;UNQ501	0.439328	0.553432
Amino acid transporter;Neutral amino acid transporter A	Q9P2X2;Q53F03;B2R7N6;P43007;B7Z9M1;B7Z561	SLC1A4	0.477712	0.553432
39S ribosomal protein L9, mitochondrial	Q9BYD2;Q5SZR1	MRPL9	0.36271	0.555453
Coiled-coil domain-containing protein 58	Q4VC31;C9JQ41;H7C525	CCDC58	-0.325343	0.556696
39S ribosomal protein L41, mitochondrial	Q8IXM3	MRPL41	0.267488	0.556696
Cellular retinoic acid-binding protein 2	P29373;Q5SYZ4	CRABP2	0.403992	0.556696
NADH dehydrogenase [ubiquinone] 1 subunit C2;NADH dehydrogenase [ubiquinone] 1 subunit C2, isoform 2	A0A024R5K6;O95298;E9PRJ5;E9PM14;A0A087WUM3;E9PQ53	NDUFC2;KCTD14;NDUFC2-KCTD14	-0.454901	0.55742
ATP synthase subunit epsilon-like protein, mitochondrial;ATP synthase subunit epsilon, mitochondrial	Q5VTU8;P56381	ATP5EP2;ATP5E	-0.306928	0.55742
NA	A8K6S3	NA	0.317117	0.559547
Proteasome subunit alpha type;Proteasome subunit alpha type-3	Q6IB71;A0A140VK43;P25788	PSMA3	0.206113	0.561447
Tyrosine--tRNA ligase, cytoplasmic;Tyrosine--tRNA ligase, cytoplasmic, N-terminally processed;Tyrosine--tRNA ligase	A0A0S2Z4R1;P54577;A0A0C4DGZ5	YARS	0.226344	0.561447
Nucleolar transcription factor 1	E9PKP7;P17480;B4DNQ1;A8K962;O00164;Q05BZ1;B4DLB0	UBTF	0.502995	0.561447
Spectrin alpha chain, non-erythrocytic 1	Q13813	SPTAN1	-0.293507	0.562666
Sperm-associated antigen 7	O75391;I3L0X5	SPAG7	0.365686	0.562666
F-box-like/WD repeat-containing protein TBL1XR1	Q9BZK7;B7Z475;A0A0D9SF63	TBL1XR1	-0.862701	0.563976
Calcium/calmodulin-dependent protein kinase type II subunit beta	A4D2J9;Q13554;D3DVK8;Q53H78	CAMK2B	-0.443459	0.563976
Protein transport protein Sec61 subunit alpha isoform 1	B3KNF6;B4DR61;P61619;H7C1Q9;C9JXC6;H7C069;A6NK38;F2Z2C7;A6NIF9;C9JJV4	SEC61A1;SEC61A2	-0.376163	0.563976
Methionine aminopeptidase 1	P53582;Q5CZ91	METAP1;DKFZp781C0419	0.365818	0.564286
Unconventional myosin-XVIIIb	Q8IUG5;A0A075B6F5;F5GXR6	MYO18B	0.495174	0.56447
Annexin A3;Annexin	P12429;D6RA82	ANXA3	-0.200459	0.564616
Proteasome subunit alpha type;Proteasome subunit alpha type-2	Q53GF5;A0A024RA52;P25787;C9JCK5	PSMA2	-0.266487	0.565615
Vacuolar protein sorting-associated protein VTA1 homolog	A0A087WY55;Q9NP79;Q9C063;Q5TGM0	VTA1	-0.456986	0.568561
Ras-related protein Rab-7a	A0A158RFU6;P51149;C9J8S3;C9J4V0;C9J4S4;C9J592	RAB7A	-0.327804	0.568561
Casein kinase I isoform alpha	V9HW00;P48729;Q05DL3;Q6PJ06;B4E1D9;B4DER9;D6REM4;E7ETM0	HEL-S-77p;CSNK1A1	0.204465	0.568561
Ribosyldihydronicotinamide dehydrogenase [quinone]	Q5TD07;B3KPX6;A0A024QZT9;P16083;Q5TD05;Q59EN2	NQO2	0.256752	0.568561
Zinc-binding alcohol dehydrogenase domain-containing protein 2	Q8N4Q0;Q4G1C4	ZADH2	-0.29833	0.569114
Guanidinoacetate N-methyltransferase	V9HWB2;Q14353;B4DMJ3	HEL-S-20;GAMT	-0.211269	0.571756
Band 4.1-like protein 3;Band 4.1-like protein 3, N-terminally processed	A0A0A0MRA8;Q9Y2J2;A0A0A0MSA4;A0A1B0GTF8;B7Z8M8	EPB41L3	-0.287994	0.573867
Collagen alpha-1(XII) chain	D6RGG3;Q99715;A0A087X0A8;B9EJB8	COL12A1	0.216787	0.575313
ATP-dependent RNA helicase A	Q08211;Q58F26;Q6PJK6	DHX9	0.288702	0.575313
Ras-related protein Ral-A	P11233;H7C3P7	RALA	0.325804	0.575498
NADH dehydrogenase [ubiquinone] iron-sulfur protein 5	Q6IBA0;O43920	NDUFS5	-0.203665	0.575983
NA	A0A0J9YX62;C9J2C4;A7UJ17;C9JDR7;C9JDX6;F8WCZ4;C9J2P2;B4DNF1	DNAJB6	0.255304	0.576364
Serine--tRNA ligase, cytoplasmic	Q0VGA5;Q53HA4;Q5T5C7;P49591	SARS	0.4908	0.578681
Small nuclear ribonucleoprotein Sm D1	P62314;Q7Z5A3;J3QLI9	SNRPD1	0.188909	0.579808
Splicing factor 3B subunit 1	O75533;Q7Z497	SF3B1	0.268242	0.579808
39S ribosomal protein L44, mitochondrial	A0A024R473;Q9H9J2	MRPL44	0.360608	0.579956
Calpain small subunit 1	A0A0C4DGQ5;P04632;K7ELJ7;K7EM73;K7EIV0;A0A075B7C0;U3KQE2;K7EKD8	CAPNS1	0.471266	0.579956
NADH dehydrogenase [ubiquinone] iron-sulfur protein 8, mitochondrial	O00217;A0A024R5K3;E9PPW7;Q53G17;E9PKH6;E9PN51;F8W9K7;B4DYI3	NDUFS8	-0.549322	0.581116
Heat shock protein HSP 90-beta	A0A024RD80;P08238;B4DMA2;B4DGL0	HSP90AB1	-0.162139	0.582239
Microtubule-associated protein 1B;MAP1B heavy chain;MAP1 light chain LC1	A0A024RAM4;P46821;A2BDK6;Q5H9P1	MAP1B;DKFZp686F1345	0.337491	0.582239
Pre-mRNA-processing-splicing factor 8	Q6P2Q9;B4DK16	PRPF8	0.372863	0.582449
Apolipoprotein C-III	A3KPE2;B0YIW2;P02656	APOC3	1.23113	0.582936
Brain acid soluble protein 1	P80723	BASP1	-0.393591	0.583771
Tetraspanin;CD81 antigen	E9PJK1;E9PRJ8;H0YDL9;H0YDJ9;A0A024RCB7;E9PIF1;A6NMH8;P60033	CD81	-0.231524	0.583771
Syntaxin-7	O15400;B4DH37	STX7	-0.36425	0.584895
Ras-related protein Rab-24	Q969Q5;F8W8H5;Q8WY67	RAB24	-0.600228	0.585435
GPI transamidase component PIG-S	Q8NBL9;B2RBB2;Q96S52;Q96IR5	PIGS	-0.458801	0.585435
PDZ domain-containing protein GIPC1	A8K2I7;A0A024R7I0;O14908;K7EM11;A0A024R7I1	GIPC1	0.262366	0.585547
ELMO domain-containing protein 2	D6RBS5;Q8IZ81;V9GY58;D6RHX2	ELMOD2	0.454713	0.585547
Receptor expression-enhancing protein;Receptor expression-enhancing protein 5	B7Z6B3;B2R6C4;Q00765;B7Z2A3	REEP5	-0.588458	0.586273
Vesicular integral-membrane protein VIP36	B4DWN1;A8K7T4;Q12907;D6RBV2;D6RIU4;D6RDX1	LMAN2	0.364609	0.586273
Serine/threonine-protein kinase WNK1	D3DUP2;F5GWT4;D3DUP1;Q9H4A3;A5D8Z4	WNK1	0.377268	0.586273
NADH dehydrogenase [ubiquinone] complex I, assembly factor 7	C9J236;C9JS27;B4DXV9;Q7L592;B4DQY3;C9JP36	NDUFAF7	0.372184	0.586549
Transforming acidic coiled-coil-containing protein 2	O95359;E7EMZ9;E9PBC6;B2RWP4;B7ZMJ9;Q4VXL8;Q4VXL4;D6RAA5	TACC2	0.883449	0.587294
3-hydroxyisobutyryl-CoA hydrolase, mitochondrial	A0A140VJL0;Q6NVY1;B9A058	HIBCH	0.159565	0.58788
Tubulin-folding cofactor B	K7EK42;Q99426;K7EP07	TBCB	0.334987	0.587948
Integrin alpha-7;Integrin alpha-7 heavy chain;Integrin alpha-7 light chain;Integrin alpha-7 70 kDa form	J3KNV4;Q4LE35;Q13683;B3KMS6	ITGA7;ITGA7 variant protein	-0.296445	0.588485
Copper chaperone for superoxide dismutase;Superoxide dismutase [Cu-Zn]	J3KNF4;O14618;E9PP76	CCS	0.362164	0.58869
Torsin-1A-interacting protein 1	A0A0A0MSK5;Q5JTV8;J3KN66;H0YD16	TOR1AIP1	0.692771	0.58869
Phosphate carrier protein, mitochondrial	Q8NCF7;B2RE88;A0A024RBE8;A0A024RBH9;Q00325;F8VVM2;Q53HC3	SLC25A3	0.157126	0.591216
2-oxoisovalerate dehydrogenase subunit beta, mitochondrial	B7ZB80;A0A140VKB3;P21953;B4E2N3;A0A0K2GN21	BCKDHB	0.208867	0.592124
Ribosomal protein L19;60S ribosomal protein L19	J3QR09;J3KTE4;P84098;Q53G49;Q8IWR8;J3QL15	RPL19	0.302833	0.592124
Nucleolar protein 58	Q9Y2X3;B3KN82	NOP58	0.303772	0.592124
Nuclear receptor-binding protein	B4DW31;Q9UHY1;F8W6G1	NRBP1	0.39324	0.592124
NADH dehydrogenase [ubiquinone] iron-sulfur protein 6, mitochondrial	Q6IBC4;O75380;D6RBT3	NDUFS6	-0.339453	0.593184
Pre-mRNA-processing factor 19	Q9UMS4	PRPF19	0.214293	0.594869
39S ribosomal protein L55, mitochondrial	A0A024R3R0;Q7Z7F7;X6R631	MRPL55	-0.384934	0.595308
2-amino-3-ketobutyrate coenzyme A ligase, mitochondrial	O75600;A8K228	GCAT	-0.34918	0.595308
Integrin-linked protein kinase	V9HWF0;A0A0A0MTH3;Q13418	HEL-S-28;ILK	0.189306	0.595308
NA	H0Y2W2	ATAD3A	0.258968	0.595308
Eukaryotic translation initiation factor 3 subunit E	Q6IAX5;P60228;B2R806;B3KW56;E5RGA2	EIF3E	-0.448106	0.596125
tRNA (cytosine(34)-C(5))-methyltransferase	Q08J23	NSUN2	0.338634	0.598175
Talin-2	Q9Y4G6;A0A1C7CYV7;A0A1B0GVU7;G1UI21;H0YMT1	TLN2	0.342314	0.600413
ATP synthase subunit beta;ATP synthase subunit beta, mitochondrial	V9HW31;P06576;Q0QEN7;H0YH81;F8W079	HEL-S-271;ATP5B	-0.171003	0.600468
Fatty acid-binding protein, epidermal	E7DVW5;Q01469;I6L8B7	FABP5	-0.290003	0.602033
Drebrin-like protein	Q9UJU6;B4DDD6;Q59FH4;H0Y5J4;B4DDU5;B4DKZ4;B4DXL9;B4DUF9	DBNL	-0.350593	0.603209
28S ribosomal protein S36, mitochondrial	P82909	MRPS36	0.169302	0.603209
Histone-lysine N-methyltransferase SMYD1	Q8NB12;E9PHG3;Q5GJ33;Q5HYE8;Q5GJ32	SMYD1;DKFZp313O0925	0.193353	0.603209
NA	F8W0P7	ATP5B	-0.315878	0.603492
Proteasome subunit beta type-3	P49720;A0A087WXQ8;A0A087WY10;A0A087WUL2	PSMB3	0.321341	0.603591
Fumarylacetoacetate hydrolase domain-containing protein 2A;Fumarylacetoacetate hydrolase domain-containing protein 2B	A0A024RE27;Q96GK7;Q6P2I3;D3DXG4;D3DXG5	FAHD2A;FAHD2B;hCG_2002650	0.191358	0.604014
Exportin-2	P55060;B4DM31;B4DUC5;B4DM67;B4DPS6	CSE1L	-0.296963	0.604217
Toll-interacting protein	Q6FIE9;Q9H0E2;Q8N8J5;F2Z2Y8;E9PNS3	TOLLIP	0.237425	0.604217
Fascin	B3KTA3;Q16658	FSCN1	0.252555	0.604217
Signal recognition particle subunit SRP72	Q86X80;A0PJJ5;Q0D2M6;V9HWK0;O76094;R4GNC1	SRP72;HEL103	0.36048	0.604217
Cytochrome b-c1 complex subunit Rieske, mitochondrial;Cytochrome b-c1 complex subunit 11;Putative cytochrome b-c1 complex subunit Rieske-like protein 1	P47985;P0C7P4	UQCRFS1;UQCRFS1P1	-0.244664	0.604646
NA	Q6ZN40	TPM1	0.383868	0.604646
Tubulin alpha-1A chain;Tubulin alpha-3C/D chain;Tubulin alpha-3E chain	Q71U36;B4DQK4;Q1ZYQ1;Q13748;Q9UQM3;F8VQQ4;Q6PEY2	TUBA1A;TUBA2;TUBA3C;TUBA3E	-0.248831	0.605614
High mobility group protein HMG-I/HMG-Y	B4DWA0;A0A024RCT9;P17096	HMGA1	-0.156451	0.605614
Farnesyl pyrophosphate synthase	P14324;B3KMW3;A0A087X1D8;A0A087WVN4;Q14329	FDPS	0.277196	0.605614
BAG family molecular chaperone regulator 2	B3KN59;O95816;B3KM36	BAG2	-0.543334	0.605984
TIP41-like protein	O75663	TIPRL	-0.34581	0.606812
60S ribosomal protein L6	Q8TBK5;Q8N5Z7;A0A024RBK3;Q9HBB3;Q02878;B4DRX3	RPL6	0.173578	0.606812
Putative oxidoreductase GLYR1	K7EMM8;D3DUE6;Q49A26;D3DUE7	GLYR1;N-PAC	0.296108	0.606812
Translocon-associated protein subunit delta	P51571;A6NLM8	SSR4	0.306281	0.607962
Golgin subfamily B member 1	Q14789;E7EU81	GOLGB1	0.499011	0.607962
Cullin-5	Q93034;L0L6C1	CUL5	-0.337043	0.609685
14-3-3 protein beta/alpha;14-3-3 protein beta/alpha, N-terminally processed	V9HWD6;P31946;B5BU24	HEL-S-1;YWHAB	0.305584	0.609685
Tetraspanin;CD151 antigen	E9PMR4;A0A024RCB3;P48509;E9PRJ3;Q53FU5	CD151	0.379482	0.609685
Pre-mRNA 3-end-processing factor FIP1	B4DTW7;Q6UN15	FIP1L1	0.328778	0.610185
WD repeat-containing protein 37	Q9Y2I8;C9JGR9;E7EQ49;A0A087WTQ2	WDR37	0.272549	0.611239
NA	CON__P02662	NA	0.897353	0.611855
Manganese-transporting ATPase 13A1	A0A024R7P3;A0A024R7N2;Q9HD20	ATP13A1	0.299351	0.613763
Perilipin-3	O60664;A0A140VJN8;K7ERZ3;K7EL96	PLIN3	-0.213429	0.615641
Stress-70 protein, mitochondrial	B7Z4V2;V9HW84;P38646;Q8N1C8;B7Z4T3;B7Z1V7	HEL-S-124m;HSPA9	0.162238	0.616853
Transcription elongation regulator 1	O14776;G3V220	TCERG1	0.360265	0.618587
40S ribosomal protein S14	P62263;H0YB22;E5RH77	RPS14	-0.225424	0.619044
Protein disulfide-isomerase	A0A024R8S5;P07237;B4DUA5;H7BZ94;B4DLN6;B4DNL5;H0Y3Z3	P4HB	-0.147108	0.619186
Lactadherin;Lactadherin short form;Medin	B3KTQ2;A0A024RC55;Q08431;A0A024RC59;F5GZN3;B4E396	MFGE8	0.228808	0.619186
Suppressor of G2 allele of SKP1 homolog	A8K5T7;Q9Y2Z0;A8K7W3;B4DYC6	SUGT1	0.285327	0.619186
60S ribosomal protein L29	A0A024R326;Q6IPI1;P47914	RPL29	0.380371	0.619809
60S ribosomal protein L17	A0A087WXM6;J3QQT2;J3KRX5;A0A024R261;A0A0A6YYL6;P18621;J3QLC8;A0A0A0MRF8;J3KRB3;A0A087WWH0;J3QS96	RPL17;hCG_24487;RPL17-C18orf32	0.276264	0.620307
Beta-2-microglobulin;Beta-2-microglobulin;Beta-2-microglobulin form pI 5.3	B4E0X1;P61769;H0YLF3;A6XMH5;F5H6I0;A6XND9;A6XMH4	B2M	0.367065	0.620307
Zyxin	Q15942;H0Y2Y8;Q96AF9;Q28617;Q9BUS0;B4DQR8;B4DY85	ZYX	-0.434991	0.62116
SAFB-like transcription modulator	Q9NWH9;H7BXE3;A0A024R5X3;H0YL55	SLTM	0.280288	0.622141
Interleukin enhancer-binding factor 3	A0A024R7C7;Q12906;F4ZW64;A8K590;F4ZW65;F4ZW66;B4DFG4;Q59GP7	ILF3	0.371104	0.622141
Vascular cell adhesion protein 1	Q53FL7;P19320;E9PDD2	VCAM1	-0.40413	0.622721
Protein lunapark	B7Z829;B7ZLA9;Q9C0E8;B7Z7F5	KIAA1715;LNP	0.341544	0.622853
Splicing factor 3B subunit 2	Q13435;E9PPJ0;Q7Z3K9;E9PJ04;H0YCG1	SF3B2;DKFZp781L0540	0.263701	0.624182
Mycophenolic acid acyl-glucuronide esterase, mitochondrial	Q9NUJ1	ABHD10	-0.376442	0.625785
39S ribosomal protein L45, mitochondrial	A0A087X2D5;B4DEF8;Q9BRJ2;A0A0G2JMS5;A0A087WU62	MRPL45	0.183885	0.625785
Acyl-protein thioesterase 1	A0A087X1K9;E5RGR0;Q6IAQ1;B4DJV9;O75608;B4DP64	LYPLA1	0.263669	0.625785
Ubiquitin-conjugating enzyme E2 N	V9HW41;P61088;F8VSD4;F8VV71;F8VZ29	HEL-S-71;UBE2N	0.218304	0.62657
Beta-actin-like protein 2	Q562R1	ACTBL2	0.431224	0.627227
Heme oxygenase 2	Q6IBP2;P30519;B3KSE0;A0A087WT44;I3L159;I3L1F5	HMOX2	-0.418222	0.63022
5-AMP-activated protein kinase catalytic subunit alpha-2	P54646;B2RA25;A0MZF5;A0A087WXX9	PRKAA2	0.344459	0.63022
Glutathione S-transferase Mu 2	Q0D2I8;P28161;E9PHN7;A8HT81;E9PHN6;F6XZQ7;E9PLF1	GSTM2	0.212674	0.631219
Cytochrome b-c1 complex subunit 6, mitochondrial	Q567R0;P07919	UQCRH	-0.211548	0.632001
Cytochrome c oxidase assembly factor 3 homolog, mitochondrial	A0A024R1X4;Q9Y2R0;K7EPV0	hCG_16955;COA3	0.269484	0.632001
Transcription activator BRG1	A7E2E1;Q9HBD4;B9EGQ8;A0A0A0MT49;P51532;B4E0F1;B4DSI8;B3KNW7;Q59FZ6	SMARCA4	0.389487	0.632001
40S ribosomal protein S27;40S ribosomal protein S27-like	H0YMV8;Q71UM5;C9JLI6	RPS27L	0.186268	0.636506
N-acylneuraminate cytidylyltransferase	Q8NFW8;Q53GF0	CMAS	0.451034	0.636506
ATP-binding cassette sub-family B member 10, mitochondrial	Q9NRK6;Q6ZMF8	ABCB10	0.639976	0.639694
Nuclease-sensitive element-binding protein 1	P67809;Q6PKI6;Q7KZ24;H0Y449	YBX1	-0.23977	0.640679
Casein kinase II subunit alpha	E7EU96;Q5U5J2;P68400;Q2I0Y7;B2R6D7	CSNK2A1	0.38197	0.640679
Ran GTPase-activating protein 1	A0A024R1U0;P46060;B4DY16;B4E0U0	RANGAP1	0.317139	0.642476
Importin-5	A0A024RDY0;O00410;H0Y8C6;B4E0R6;B3KWG6	RANBP5;IPO5	0.301201	0.642727
Splicing factor 1	A0A024R588;A0A024R566;B4DJU4;A0A024R5D9;A0A024R572;Q15637;B4DX42	SF1	-0.408508	0.643776
Ribosome maturation protein SBDS	A0A0S2Z5I7;Q9Y3A5;A0A087X020	SBDS	0.200623	0.643776
28S ribosomal protein S6, mitochondrial	P82932	MRPS6	0.258013	0.643901
Cytochrome b-c1 complex subunit 2, mitochondrial	P22695;H3BRG4;H3BSJ9;H3BP04	UQCRC2	-0.222496	0.644406
Prothymosin alpha;Prothymosin alpha, N-terminally processed;Thymosin alpha-1	B8ZZQ6;V9HVW6;Q15202;Q8TBK9;Q86YS2;Q53S24;Q15204;P06454;Q15200;B8ZZA1;B8ZZW7;H7C2N1;Q15203;Q7KZ52;Q7Z4R6	PTMA;PTMAP7	0.544263	0.644406
ATPase inhibitor, mitochondrial	Q9UII2	ATPIF1	0.364975	0.644858
Mitochondrial fission regulator 1-like	A0A0S2Z5H6;B4DRE5;Q9H019;E9PLD2;B2RAQ5;C9JF50;E9PLU1;E9PRK5;B3KPT5	MTFR1L	0.253498	0.644899
NA	A0A024R152;A0A024R167;C9JVY5	hCG_28765;AKAP2	0.205823	0.644921
Nuclear protein localization protein 4 homolog	A0A024R8R4;Q8TAT6;B4DG89	NPLOC4	0.317431	0.647818
Fructosamine-3-kinase	Q9H479;B4DH12;B3KNR9	FN3K	-0.222269	0.649458
UDP-glucose:glycoprotein glucosyltransferase 1	A8KAK1;Q9NYU2	UGGT1	-0.320916	0.651137
Enoyl-CoA hydratase domain-containing protein 3, mitochondrial	A0A140VKF9;Q96DC8;Q5W0J8	ECHDC3	0.222666	0.651312
NLR family member X1	Q86UT6;B7Z889	NLRX1	0.256521	0.651312
Lysophospholipid acyltransferase 7	B4DDH8;Q96N66	MBOAT7	-0.224552	0.6531
Heterogeneous nuclear ribonucleoprotein Q	Q05CK9;O60506;B2R8Z8;Q59GL1;B7Z645	SYNCRIP	0.21741	0.6531
Small nuclear ribonucleoprotein Sm D3	P62318;H3BT13	SNRPD3	0.299367	0.6531
Coiled-coil domain-containing protein 69	D3DQH5;A6NI79;H0YBY5;Q7L2X4	CCDC69	0.430423	0.6531
NA	CON__Q3SX09	NA	-0.953109	0.653699
Polyadenylate-binding protein 2	Q86U42	PABPN1	0.353431	0.653699
NA	B2R642	NA	0.332514	0.654187
Synaptosomal-associated protein;Synaptosomal-associated protein 23	A8K287;O00161;A0A024R9R8;H3BNE1;H3BR18;H3BM38;H3BPJ0	SNAP23	0.181609	0.656284
Ragulator complex protein LAMTOR1	F5GX19;F5H3Y3;Q6IAA8;H0YFI1;F5H479	LAMTOR1	-0.257161	0.658758
Pleckstrin homology domain-containing family A member 6	Q5VTI5;A0A1B0GUN5;Q9Y2H5	PLEKHA6	0.333832	0.659729
Glutaminase kidney isoform, mitochondrial	A8K132;O94925;Q53TX0	GLS	0.351558	0.66017
Argininosuccinate lyase	A0A024RDL8;P04424;A0A0S2Z316;B4DU69;A0A0S2Z3B0;F8W943	ASL	-0.683684	0.660335
Potassium/sodium hyperpolarization-activated cyclic nucleotide-gated channel 4	Q9Y3Q4	HCN4	0.38177	0.660335
Myelin expression factor 2	A0A0A0MQW0;A0A0A0MR39;A0A087WUT0;Q9P2K5;A0A024R5Q6	MYEF2	-0.250782	0.661068
U2 snRNP-associated SURP motif-containing protein	O15042;E7ET15	U2SURP	0.214643	0.661068
Sulfite oxidase, mitochondrial	B2R6Y2;A0A024RB79;P51687;D6QX84	SUOX	-0.403587	0.662012
Methylcrotonoyl-CoA carboxylase beta chain, mitochondrial	A0A140VK29;Q9HCC0;D6RDF7;A0A0S2Z5R4	MCCC2	-0.221218	0.663019
Caldesmon	Q9NYG1;E9PGZ1;A0A140VKA0;B7Z6G4;E7EX44;Q05682;C9J813;B4DPW5;B4E3I0;Q6PJM5	CALD1	-0.574772	0.663519
WD repeat-containing protein 44	Q5JSH3;Q8N397;H7BY83;B7Z947	WDR44;DKFZp761M142	-0.400983	0.663519
Proliferation-associated protein 2G4	A8K6Y1;Q6PIN5;A0A024RB85;Q9UQ80;Q05D08;F8VR77	PA2G4	0.161624	0.663519
Protein-tyrosine-phosphatase;Tyrosine-protein phosphatase non-receptor type 23	B4DST5;Q9H3S7;B4DJ12;B4DJ21	PTPN23	0.696295	0.663519
Thioredoxin, mitochondrial	B4DX69;Q99757;M0QXH0	TXN2	0.251884	0.664435
Peptidyl-prolyl cis-trans isomerase FKBP5;Peptidyl-prolyl cis-trans isomerase FKBP5, N-terminally processed	B7Z8G2;Q53GX4;Q2TA84;Q13451;B7Z7Z8	FKBP5	0.264024	0.664435
Fatty acid synthase;[Acyl-carrier-protein] S-acetyltransferase;[Acyl-carrier-protein] S-malonyltransferase;3-oxoacyl-[acyl-carrier-protein] synthase;3-oxoacyl-[acyl-carrier-protein] reductase;3-hydroxyacyl-[acyl-carrier-protein] dehydratase;Enoyl-[acyl-carrier-protein] reductase;Oleoyl-[acyl-carrier-protein] hydrolase	P49327;A0A0U1RQF0	FASN	0.313768	0.664435
Leukotriene A-4 hydrolase;Leukotriene A(4) hydrolase	A0A140VK27;P09960;B4DVZ8;Q59ES1	LTA4H	0.179977	0.664599
NA	A1L0S7;B7Z6H8	TNS1	0.20984	0.665235
Kinesin-like protein KIF13A	Q9H1H9;A0A1B0GUA8	KIF13A	-0.229665	0.666727
Inosine-5-monophosphate dehydrogenase 2	H0Y4R1;P12268;B7Z1G4;Q6QE17	IMPDH2	-0.257282	0.668187
Tyrosine-protein phosphatase non-receptor type 11	Q06124	PTPN11	0.207979	0.668187
Tropomyosin alpha-4 chain	V9HW56;P67936;B4DVY2	HEL-S-108;TPM4	0.447153	0.669135
Enhancer of mRNA-decapping protein 4	Q6P2E9;B7Z7V8	EDC4	0.285996	0.669639
5-3 exoribonuclease 2	B4DZC3;B3KMC9;Q9H0D6;B4E0B9	XRN2	0.245308	0.669872
Mediator of RNA polymerase II transcription subunit 23	Q5JWT2;Q9ULK4;B4E3G4;B9TX53;B9TX52;B9TX51;B9TX50;B9TX49	MED23	-1.25556	0.670567
Calcium/calmodulin-dependent protein kinase type II subunit alpha	Q8IWE0;Q7LDD5;Q9UQM7;A8K161	CAMK2A	0.269871	0.670567
AP-2 complex subunit alpha-2	B7Z5S9;O94973;A0A0G2JS82;A0A0G2JQM1;B7Z1Q4	AP2A2	0.252831	0.672423
SUN domain-containing protein 2	A0A024R1P7;B4E2A6;Q9UH99;B4DIU6;Q6NT72;A8K129	UNC84B;SUN2	0.720701	0.672802
Crooked neck-like protein 1	Q5JY65;Q9BZJ0;Q69YP1;Q8IXG0	CRNKL1;DKFZp762M013;crn	-0.225853	0.675235
Tenascin-X	A0A140TA52;A0A140TA41;A0A140TA33;P22105;A0A140T9C0;A0A140T902;A0A140T8Y3;A0A140T8Z8;A0A140T956;A0A087X0I0	TNXB	0.361544	0.675355
Cell cycle and apoptosis regulator protein 2	B3KTJ9;Q8N163;H0YB24;G3V119;E2PSM9	CCAR2	0.386327	0.675355
Aspartyl/asparaginyl beta-hydroxylase	Q12797	ASPH	-0.373178	0.675536
Asparagine--tRNA ligase, cytoplasmic	O43776;B4DN60	NARS	-0.299649	0.675536
Protein PBDC1	Q9BVG4;Q9P0N4;A6NDF3	PBDC1	0.205427	0.675536
Hsp90 co-chaperone Cdc37;Hsp90 co-chaperone Cdc37, N-terminally processed	A0A024R7B7;Q16543;Q6FG59;K7EQA9;K7EKQ2	CDC37	0.355544	0.675536
Tropomyosin beta chain	P07951;Q5TCU8	TPM2	-0.37615	0.678346
MICOS complex subunit MIC60	Q16891;B9A067;B4DQY2;B4DKR1;B4DT20	IMMT	0.127343	0.678346
NADH dehydrogenase [ubiquinone] 1 alpha subcomplex subunit 8	P51970;B7Z768	NDUFA8	-0.247342	0.678472
Polymerase I and transcript release factor	Q6NZI2;B4DPZ5;B4DNU9;B3KRY5	PTRF	0.164712	0.678495
Ubiquitin-like protein ISG15	P05161;A0A096LNZ9;A0A096LPJ4	ISG15	0.299771	0.678495
40S ribosomal protein S6	Q96DV6;A2A3R6;P62753;A2A3R5	RPS6	0.158435	0.681513
Adipocyte enhancer-binding protein 1	Q8IUX7;B4DJB3	AEBP1	0.269239	0.681513
Heterogeneous nuclear ribonucleoprotein D-like	A0A087WUK2;A0A024RDF6;O14979;B4DTA2	HNRNPDL;HNRPDL	0.281481	0.682293
Regulator of nonsense transcripts 1	A0A024R7L5;A0A024R7L8;Q92900	UPF1	0.25863	0.682648
SWI/SNF-related matrix-associated actin-dependent regulator of chromatin subfamily B member 1	Q9H836;G5E975;Q12824;B5MCL5;C9JTA6;A0A0G2JSE9;Q86WI8;A0A0U1RQQ2;Q86WI7;A0A0U1RRB8;B4E117;B4DRT1	SMARCB1	0.304774	0.683968
Wolframin	A0A0S2Z4V6;O76024	WFS1	-0.442871	0.685324
Citrate synthase;Citrate synthase, mitochondrial	B4DJV2;A0A024RB75;O75390;B3KTN4;A0A0C4DGI3	CS	-0.168378	0.685324
Eukaryotic translation initiation factor 2 subunit 1	Q53XC0;P05198;G3V4T5;H0YJS4	EIF2S1	0.252329	0.685324
Omega-amidase NIT2	V9HW91;Q9NQR4	HEL-S-8a;NIT2	-0.292061	0.685541
NAD kinase 2, mitochondrial	Q4G0N4;A0A0C4DGV3;A0A024R048;B7Z8V7	NADK2;FLJ30596	-0.227517	0.685541
Enoyl-CoA delta isomerase 2, mitochondrial	Q53HG3;Q53GC8;A0A0C4DGA2;A0A024QZU5;O75521;B4DLL3;Q59E94;Q9NYD2;F1LLU7;F8WAW4;C9JB63	ECI2;PECI;HCA64	-0.165727	0.685541
Catalase	P04040;B4DWK8	CAT	0.168805	0.685541
3-hydroxybutyrate dehydrogenase type 2	A0A024RDG9;Q9BUT1;A8K5M0;A0A024RDJ8;D6R9U8;D6RIR6;B3KY19	BDH2	0.183271	0.685541
Collagen alpha-2(IV) chain;Canstatin	A0A024RDW8;P08572;B4DH43	COL4A2	0.195693	0.685541
CD166 antigen	Q13740;F5GXJ9;B3KNN9;B4DX43	ALCAM	0.226573	0.685541
Alpha-N-acetylgalactosaminidase	A0A024R1Q5;P17050	NAGA	0.372785	0.685541
Stathmin	P16949;B5BU83;A2A2D0;Q96CE4;A0A140VJW2	STMN1	0.208286	0.685997
Eukaryotic translation initiation factor 5B	A0A087WUT6;O60841;B3KM86;D3DVI5	EIF5B	-0.37714	0.687813
Receptor protein-tyrosine kinase;Receptor tyrosine-protein kinase erbB-2	X5DNK3;P04626;B4DTR1;J3QLU9	ERBB2	0.18479	0.687899
26S proteasome non-ATPase regulatory subunit 6	Q15008;B3KT66;C9J0E9	PSMD6	0.187087	0.687899
Nucleobindin-1	Q53GX6;A8K7Q1;Q02818;B4DZX0;C9JKZ2;H7BZI1	NUCB1	0.326823	0.687899
High mobility group protein HMGI-C	F5H2U8;F5H2A4;F6LHU9;Q1M183;F5H6H0;P52926;D2WHG0;A5Y0M9	HMGA2	-0.108976	0.689119
Armadillo repeat-containing X-linked protein 1	A0A024RCI6;Q9P291	ARMCX1	-0.53133	0.68913
Low molecular weight phosphotyrosine protein phosphatase	Q59EH3;P24666;G5E9R5;A0A140VK37	ACP1	0.181758	0.68913
Hepatoma-derived growth factor	P51858;B2RDE8;A8K8G0;B7Z958;B7Z525	HDGF	0.331078	0.68913
E3 ubiquitin-protein ligase TRIM63	Q6NR77;Q969Q1	TRIM63	-0.281413	0.689723
Dihydropteridine reductase	A0A140VKA9;P09417;B7Z415;D6RGG7	QDPR	-0.194618	0.690489
Up-regulated during skeletal muscle growth protein 5	Q96IX5	USMG5	0.138829	0.690489
Rho-related GTP-binding protein RhoC	Q5JR08;A0A024R0I3;P08134;E9PQH6;Q5JR07;C9JNR4;C9JX21;Q5JR05	RHOC;hCG_2043376;RHOA	0.272655	0.691408
Myotrophin	Q69YG1;P58546;C9JL85	DKFZp761E1322;MTPN	-0.35442	0.691891
Destrin	V9HWA6;P60981;F6RFD5;B7Z9M9	HEL32;DSTN	0.184533	0.691891
Secretory carrier-associated membrane protein 1	O15126;B4E2V7;A0A087WXB0;A8K2G0;A0A087WU14;B4DP10;Q96AZ4	SCAMP1	-0.288273	0.693009
NA	A0A1B0GWJ6	NA	0.296369	0.693009
TBC1 domain family member 4	A0A024R637;O60343	TBC1D4	0.241031	0.696517
Serum albumin	CON__P02768-1;P02768;A0A0C4DGB6;Q56G89;B2RBS8;B4DPP6;A8K9P0;B4DPR2;B7WNR0;H0YA55;C9JKR2;A0A087WWT3	ALB	0.255732	0.696517
Mitochondrial fission factor	A0A024R491;Q9GZY8	C2orf33;MFF	-0.507309	0.697242
Calmodulin	B4DJ51;B2RDW0;H0Y7A7;P62158;Q9BRL5;E7ETZ0;E7EMB3;A8K1M2;Q96HY3;G3V361	CALM3;CALM2;CALM1	0.276094	0.697242
Transmembrane emp24 domain-containing protein 9	B2R8A2;A0A024R7M0;Q9BVK6	TMED9	0.264173	0.69791
Aminoacyl tRNA synthase complex-interacting multifunctional protein 1;Endothelial monocyte-activating polypeptide 2	Q12904;B4DNK3	AIMP1	0.352152	0.69791
Serine/arginine-rich splicing factor 3	B2R6F3;P84103;A0A087X2D0	SFRS3;SRSF3	0.142258	0.701016
NFU1 iron-sulfur cluster scaffold homolog, mitochondrial	Q9UMS0	NFU1	0.165204	0.701671
Multifunctional protein ADE2;Phosphoribosylaminoimidazole-succinocarboxamide synthase;Phosphoribosylaminoimidazole carboxylase	E9PBS1;A0A024RD93;P22234;B4DGX3;D6RF62	PAICS	0.196148	0.701671
ATP synthase subunit e, mitochondrial	P56385	ATP5I	-0.197879	0.702251
ADP/ATP translocase 3;ADP/ATP translocase 3, N-terminally processed	Q6I9V5;P12236;Q59EI9	SLC25A6	0.127095	0.702528
Guanine nucleotide-binding protein G(s) subunit alpha isoforms short;Guanine nucleotide-binding protein G(s) subunit alpha isoforms XLas	A0A0S2Z3H8;P63092;Q5JWF2;B0AZR9;A0A0S2Z3S5;Q14455;Q5FWY2;S4R3E3	GNAS;GSA	0.224506	0.702576
Methionine-R-sulfoxide reductase B3	F5H7C4;F5H6G9;F5H199;H0YFW5;Q8IXL7;H7C2B7	MSRB3	-0.502426	0.704024
ADP-sugar pyrophosphatase	A6NFX8;Q9UKK9;A6NJU6	NUDT5	0.181777	0.704024
Double-strand break repair protein MRE11A	F8W7U8;A0A024R395;P49959;Q05D78	MRE11A	-0.259089	0.706563
Alpha-1-syntrophin	Q13424;B3KTR0	SNTA1	-0.199905	0.706563
Proteasome subunit alpha type;Proteasome subunit alpha type-6	A0A140VK44;G3V5Z7;P60900;G3V295;G3V3I1	PSMA6	0.187067	0.706563
Eukaryotic initiation factor 4A-II;Eukaryotic initiation factor 4A-II, N-terminally processed	Q14240;E7EQG2;Q9NZE6;Q96B07	EIF4A2	0.200735	0.706563
39S ribosomal protein L13, mitochondrial	E5RJI7;Q9BYD1	MRPL13	0.306927	0.706563
Procollagen galactosyltransferase 1	Q8NBJ5	COLGALT1	0.343432	0.706563
E3 ubiquitin-protein ligase UBR4	Q5T4S7	UBR4	0.25733	0.707955
Glypican-1;Secreted glypican-1	P35052;H7C410;A0A024R4D5;H7C024;Q59GI7	GPC1	-0.192255	0.70849
NADPH:adrenodoxin oxidoreductase, mitochondrial	Q6GSK2;P22570;B4DDI9;A0A0C4DFN8;A0A0A0MSZ4;A0A0A0MTR6;A0A0C4DGN7	FDXR	0.194243	0.70849
MAPK-interacting and spindle-stabilizing protein-like	Q8NDC0	MAPK1IP1L	0.205625	0.70849
Obscurin-like protein 1	O75147;A6NN50	OBSL1	0.207058	0.70849
Heat shock protein beta-8	Q9UJY1	HSPB8	0.241597	0.70849
RNA-binding protein 20	Q5T481	RBM20	0.368464	0.70849
Protein prune homolog	Q86TP1;Q5SZG1	PRUNE	-0.369546	0.709551
Small glutamine-rich tetratricopeptide repeat-containing protein alpha	O43765;B4DEA6;K7EMD6	SGTA	0.250493	0.709551
Nucleoporin Nup43	A0PJK4;B3KTT0;Q8NFH3	NUP43	0.257856	0.709551
Dehydrogenase/reductase SDR family member 4	Q9BTZ2;D5KJA1;D5KJA2;F5GWZ1	DHRS4;DHRS4L2	-0.257117	0.710593
Nucleosome assembly protein 1-like 1	F8VY35;F5H4R6;H0YIV4;A0A024RBB7;P55209;F8W020;F8W118;F8VV59;A0A024RBE6;F8W0J6;B7Z2V4;F8VRJ2;B7Z5H0;H0YH88;H0YHC3;F8VXI6;F8VUX1;B7Z9C2;F8VVB5	NAP1L1	0.278399	0.710593
UBX domain-containing protein 1	E9PJ81;E9PRQ7;A0A024R598;A0A024R539;Q04323;B4E0P8;Q05BV2;B4DNC6;A0A087WTZ5	UBXN1;LOC51035	0.177494	0.712114
Histone H1.2	P16403	HIST1H1C	0.231307	0.712114
Cell division cycle and apoptosis regulator protein 1	Q8IX12;A0A0C4DGG8;F5H2E6;F5H1H2;F5H3E1	CCAR1	0.462426	0.712114
Centromere/kinetochore protein zw10 homolog	B2R7C2;O43264;B4E1J7	ZW10	0.188834	0.71394
Rho GDP-dissociation inhibitor 1	J3KTF8;V9HWE8;J3QQX2;P52565;J3KRE2;J3QW41;A0A0S2Z3D9;J3KRY1	ARHGDIA;HEL-S-47e	-0.316207	0.714526
28S ribosomal protein S34, mitochondrial	C9JJ19;P82930;A4UCR9	MRPS34	-0.302339	0.714526
Prohibitin-2	Q99623;J3KPX7;F5GY37;F5GWA7;B4DW05;F5H3X6	PHB2	0.0995959	0.714526
Transformer-2 protein homolog beta	Q8N1H4;Q68DZ9;Q59GA1;B2RDQ3;P62995;H7BXF3	DKFZp686F18120;TRA2B	0.229278	0.714526
60S ribosomal protein L5	B3KTM6;A2RUM7;P46777;Q59GX9	RPL5	0.159217	0.716709
2,3-cyclic-nucleotide 3-phosphodiesterase	A0A024R1T5;P09543	CNP	0.206821	0.716709
BUB3-interacting and GLEBS motif-containing protein ZNF207	X6R4W8;J3QRS9;Q59G94;O43670	ZNF207	0.349679	0.716709
Histone H2A;Histone H2A type 1-C;Histone H2A type 3;Histone H2A type 1-B/E;Histone H2A type 1-A	Q08AJ9;A0A024R017;Q93077;Q7L7L0;P04908;Q96QV6	HIST1H2AB;HIST1H2AC;HIST3H2A;HIST1H2AA	-0.32159	0.719554
Myoglobin	B0QYF8;A0A024R1G3;P02144;F2Z2F1;B2RA67;F2Z337	MB	-0.31669	0.719554
Cytochrome b-c1 complex subunit 1, mitochondrial	P31930	UQCRC1	-0.139015	0.719554
Prostaglandin reductase 1	Q14914;A0A024R172	PTGR1;LTB4DH	0.141766	0.719554
Serine/arginine-rich splicing factor 1	J3KTL2;Q07955;Q59FA2;A8K1L8	SRSF1	0.169714	0.719554
NA	CON__P08727	NA	0.184082	0.719554
40S ribosomal protein S18	P62269	RPS18	0.185128	0.719554
Proline synthase co-transcribed bacterial homolog protein	D3DSW3;O94903;A8K520;E5RG77;B3KMP6;E5RFX7	PROSC	0.230379	0.720412
Catenin beta-1	B4DL06;A0A024R2Q3;P35222;B4DGU4;B5BU28;B4DSW9	CTNNB1	0.146474	0.720784
FACT complex subunit SPT16	Q9Y5B9	SUPT16H	0.414559	0.720784
Aldose reductase	A0A024R7A8;P15121;Q59EL5;E9PCX2	AKR1B1	-0.144359	0.721673
NADH dehydrogenase [ubiquinone] 1 alpha subcomplex subunit 7	Q6FG42;Q32Q14;O95182;Q6IB89	NDUFA7	-0.306787	0.722015
ATP-dependent RNA helicase DDX1	A3RJH1;Q92499;F1T0B3;A0A087X2G1;B4DP70	DDX1	0.173642	0.723621
Protein lin-7 homolog C	Q53FX5;Q9NUP9;G3V1D4	LIN7C	0.328509	0.723621
Serine/threonine-protein kinase PAK 2;PAK-2p27;PAK-2p34;Non-specific serine/threonine protein kinase	Q13177;A8K5M4	PAK2	0.271137	0.726178
Dermatopontin	Q07507	DPT	-0.808528	0.726401
Mitochondrial Rho GTPase 2	Q8IXI1;I3L2C6;H3BST5	RHOT2	-0.304225	0.726401
Prohibitin	Q6PUJ7;A8K401;P35232;Q6FHP5;Q53FV0;C9JW96;C9JZ20;E7ESE2;E9PCW0	HEL-S-54e;PHB	-0.100375	0.726401
Malate dehydrogenase;Malate dehydrogenase, cytoplasmic	V9HWF2;P40925;B9A041;B8ZZ51;C9JF79	HEL-S-32;MDH1	-0.0952236	0.726401
Long-chain-fatty-acid--CoA ligase 3	B3KN05;B2RBE0;A0A024R497;O95573	ACSL3	0.193225	0.726401
Nodal modulator 1	A0A0G2JN29;A0A087X117;Q15155;A0A0G2JP90;A0A087WW46	NOMO1	0.240942	0.726401
Ubiquinone biosynthesis monooxygenase COQ6, mitochondrial	Q9Y2Z9;A0A0D9SFJ1	COQ6	0.217056	0.726431
Cytochrome b5	P00167	CYB5A	0.474094	0.727124
Glutathione peroxidase;Glutathione peroxidase 1	A0A087WUQ6;Q7L4Q3;P07203;Q6NSD4	GPX1	0.14628	0.730499
Ribosome-binding protein 1	A7BI36;A0A0A0MRV0;Q9P2E9;A1A5C4;A1A5C5;F8W7S5;A0A087WVV2	RRBP1	0.270018	0.730499
Lipopolysaccharide-responsive and beige-like anchor protein	P50851	LRBA	0.281835	0.730499
Keratin, type I cytoskeletal 14	CON__P02533;P02533;A0A024R1X6	KRT14	0.61688	0.730499
Exocyst complex component 8	Q8IYI6	EXOC8	0.190489	0.730534
NA	B4DLN1	NA	-0.298606	0.730644
mRNA cap guanine-N7 methyltransferase	O43148;A8K946;Q05D80;K7EP06;Q05DQ2	RNMT	-0.40922	0.732112
Protein FAM136A	E7EQY1;Q96C01;B0AZT6	FAM136A	-0.25756	0.732112
Electron transfer flavoprotein subunit alpha, mitochondrial	A0A0S2Z3L0;P13804;A0A0S2Z3M4;H0YLU7;H0YKF0;H0YL12;H0YK49;H0YNX6	ETFA	-0.137429	0.732112
Tubulin gamma-1 chain;Tubulin gamma-2 chain;Tubulin gamma chain	P23258;A0A1B4Z394;Q9NRH3;K7EIS0	TUBG1;TUBG2	0.218829	0.732112
Mesencephalic astrocyte-derived neurotrophic factor	A8K878;P55145	MANF	0.298482	0.732112
Minor histocompatibility antigen H13	A0A0S2Z5V7;Q8TCT9;A0A075B6F6;A0A0S2Z6F0	HM13	-0.310358	0.732634
Zinc finger protein 512	G3XAG1;Q96ME7;B4DES6;B7Z9P6;Q658M0;B4E0X7	ZNF512;DKFZp666L156	-0.21662	0.732634
U4/U6 small nuclear ribonucleoprotein Prp31	F1T0A5;Q8WWY3;E7EVX8;B4DWW8	PRPF31	0.175879	0.732634
Cytoplasmic dynein 1 light intermediate chain 1	Q9Y6G9;B3KM42;E9PHI6;B4DDM4;Q6MZE7	DYNC1LI1;DKFZp686A1525	0.204189	0.732634
Polypyrimidine tract-binding protein 1	A0A0U1RRM4;P26599;A6NLN1;A0A0D9SF20	PTBP1	0.275771	0.732634
Alpha-soluble NSF attachment protein	M0R0Y2;A0A024R0R9;P54920;M0R2M1	NAPA	0.154004	0.732851
Transcriptional coactivator YAP1	P46937;A0A024R3E4;Q86T74;H0YCI3;B4E2Y3	YAP1;DKFZp451O0517	0.200299	0.732851
Adenylate cyclase type 5	O95622;B3KWA8;B7Z2C7	ADCY5	-0.1958	0.733214
Beta-galactosidase	Q53G40;B7Z6Q5;P16278;E7EQ29;B7Z5H9;Q53H18	GLB1	0.565386	0.735632
Supervillin	O95425	SVIL	0.190932	0.736339
Cold-inducible RNA-binding protein	D6W5Y5;K7ENX8;K7ELV6;K7EJV5;Q6ZR81;K7ELT6;B4E2A3;K7EJV1;K7EMY9;K7EPM4;Q53XX5;K7ER40;K7EQR7;Q14011	CIRBP	-0.208501	0.737881
Histone H2A;Histone H2A type 1-J;Histone H2A type 1-H;Histone H2A.J;Histone H2A type 1-D;Histone H2A type 1	A3KPC7;A0A024RAS2;B2R5B3;A4FTV9;A0A0U1RR32;A0A0U1RRH7;Q99878;Q96KK5;Q9BTM1;P20671;P0C0S8;H0YFX9;B4E0B3	HIST1H2AH;H2AFJ;HIST1H2AK;HIST1H2AJ;HIST1H2AD;HIST1H2AG	0.154315	0.737969
Calreticulin	Q53G71;V9HW88;P27797;B4DHR1;K7EJB9;B4E2Y9	HEL-S-99n;CALR	0.199904	0.739108
Alkyldihydroxyacetonephosphate synthase, peroxisomal	O00116;B7Z3Q4;A0A1B0GWA2	AGPS	0.274667	0.739108
Coatomer subunit alpha;Xenin;Proxenin	P53621	COPA	0.152149	0.745855
Alpha-aminoadipic semialdehyde synthase, mitochondrial;Lysine ketoglutarate reductase;Saccharopine dehydrogenase	A4D0W4;Q9UDR5;F8WAH1;F8WE53	AASS	0.156176	0.745855
Protein-methionine sulfoxide oxidase MICAL3	Q7RTP6	MICAL3	0.335383	0.745855
Interferon-inducible double-stranded RNA-dependent protein kinase activator A	O75569;F8WEG8;G5E9Q4;C9JMM3	PRKRA	0.160321	0.747372
Flotillin-1	Q5ST80;O75955;Q6IB58;Q53HQ0;A0A140T9R1;A2VCL5;A0A140T9X0;A2AB09;A2AB10	FLOT1	0.134528	0.747582
Serrate RNA effector molecule homolog	Q9BXP5;H7C3A1	SRRT	-0.181472	0.750595
60S ribosomal protein L13	Q6NZ55;A8K4C8;P26373;J3QSB4	RPL13	0.0858935	0.750595
Peptidyl-prolyl cis-trans isomerase FKBP9	B3KQQ0;A0A090N8P3;O95302;B7Z230;B7Z1U8	FKBP9	-0.183245	0.751713
Neutral alpha-glucosidase AB	V9HWJ0;B4DJ30;Q14697	HEL-S-164nA;GANAB	0.121569	0.751922
Probable ATP-dependent RNA helicase DDX6	B2R858;P26196	DDX6	0.239995	0.751922
Far upstream element-binding protein 3	A0A024R8A7;Q96I24	hCG_31253;FUBP3	0.322497	0.751922
SPRY domain-containing protein 4	Q8WW59;B4DUC9	SPRYD4	0.202747	0.753339
Sterol-4-alpha-carboxylate 3-dehydrogenase, decarboxylating	Q15738;C9JDR0	NSDHL	0.258198	0.753339
Nucleoprotein TPR	P12270	TPR	-0.203373	0.753943
5-AMP-activated protein kinase subunit gamma-2	B7Z6X8;E9PGP6;A0A090N8Q6;Q9UGJ0	PRKAG2	-0.191909	0.753943
Cysteine desulfurase, mitochondrial	Q5QP19;Q53FP3;Q9Y697;B2R5S3;B4DNL7;F2Z2E7	NFS1	-0.184869	0.753943
Structural maintenance of chromosomes protein 1A;Structural maintenance of chromosomes protein	Q14683;G8JLG1;Q6P2R1;A8K7A6;Q6MZR8;B7Z709	SMC1A;DKFZp686L19178	-0.168255	0.753943
Mitochondrial ribonuclease P protein 1	Q7L0Y3;C9JVB6	TRMT10C	0.181809	0.753943
Chromobox protein homolog 5	V9HWG0;P45973;Q6I9T7	HEL25;CBX5	0.321404	0.753943
Catenin delta-1	C9JZR2;O60716;Q68DU0;Q96FS1;Q7KZJ3;A0A024R4Z0;A0A024R4Y7	CTNND1;DKFZp781O2021	0.179336	0.75492
Coatomer subunit zeta-1	Q53FU3;A0A024RB72;F8VVA7;P61923;F8VXB1;F8W156;F8W651;F8VYZ4;F8VUC5;F8VXR1	COPZ1	-0.246929	0.75659
Chromatin complexes subunit BAP18	F8W038;Q8IXM2;H0YIS7;F8W1H0	C17orf49;BAP18;RNASEK-C17orf49	0.253832	0.756988
Fragile X mental retardation syndrome-related protein 1	A0A0F7KYT8;A0A0F7L1S3;P51114;A0A0F7L0Q8;B4DXZ6;E9PFF5;B4DM21;B4DM78;E7EU85;B4DGH9	FXR1	0.14522	0.759002
Ribosomal protein L15;60S ribosomal protein L15	A0A024R2Q4;P61313;B4DLP4;E7EQV9;E7ENU7;B4DEN1	RPL15	0.145388	0.759002
Tubulin--tyrosine ligase-like protein 12	A0A024R4U3;Q14166	TTLL12	0.236376	0.75959
40S ribosomal protein S26;Putative 40S ribosomal protein S26-like 1	A0A024RB14;P62854;Q75MH1;Q5JNZ5	RPS26;RPS26P11	0.169421	0.759645
Junctophilin-2	Q9BR39;B4E3T9;Q86VZ3	JPH2	0.275428	0.759645
Coiled-coil domain-containing protein 124	A0A024R7M8;Q96CT7;M0R2F5	LOC115098;CCDC124	0.167085	0.75987
Adenylate kinase 2, mitochondrial;Adenylate kinase 2, mitochondrial;Adenylate kinase 2, mitochondrial, N-terminally processed	F8W1A4;A0A140VK93;P54819;F8VZG5;B4DLK2;F8VY04;G3V213	AK2	-0.13737	0.76223
LETM1 and EF-hand domain-containing protein 1, mitochondrial	O95202;D3DVQ1	LETM1	0.149578	0.76223
60 kDa SS-A/Ro ribonucleoprotein	A0A024R983;P10155;B3KN94	TROVE2	0.282816	0.76223
Anoctamin-6;Anoctamin	Q4KMQ2;B4DZA5;B4E1V1;B3KX12	ANO6	0.18377	0.762477
Exocyst complex component 2	B3KPN7;A0A024QZT2;Q96KP1;B4DZI7	EXOC2	0.192221	0.762938
Dihydropyrimidinase-related protein 4	O14531;D3DRG7;Q5T0Q6	DPYSL4	0.159505	0.763904
NA	Q49A71;Q8NI45	COQ7	0.228171	0.763904
DNA-(apurinic or apyrimidinic site) lyase;DNA-(apurinic or apyrimidinic site) lyase, mitochondrial	Q5TZP7;P27695;G3V3M6;G3V5Q1;G3V3C7;A0A0C4DGK8;G3V5M0;G3V359;G3V5D9	APEX1	0.178198	0.764357
NADH dehydrogenase [ubiquinone] 1 beta subcomplex subunit 7	P17568	NDUFB7	0.143696	0.765314
Pre-mRNA-splicing factor ATP-dependent RNA helicase DHX15	B4E0S6;O43143	DHX15	0.152255	0.766183
Arginine--tRNA ligase, cytoplasmic	P54136;B4DXW6	RARS	0.112842	0.76686
2-methoxy-6-polyprenyl-1,4-benzoquinol methylase, mitochondrial	Q5HYK3;F8VVW7;F8VVX6;F8VP53;B4DP72	COQ5	0.322583	0.76686
Pre-mRNA-processing factor 6	O94906	PRPF6	-0.230222	0.767553
Dynamin-1-like protein	G8JLD5;O00429;D3DUW7;D3DUW6;B4DYR6;D3DUW5;Q32Q67	DNM1L	0.163788	0.76778
S-(hydroxymethyl)glutathione dehydrogenase;Alcohol dehydrogenase class-3	Q6IRT1;Q6FI45;P11766;Q5U043;Q2VIM7;H0YAG8	ADH5	-0.0896171	0.768953
39S ribosomal protein L15, mitochondrial	Q9P015;B2R739;E5RIZ4;E5RHF4	MRPL15	0.149847	0.771416
Chromodomain-helicase-DNA-binding protein 4	B3KY63;F5GWX5;A0A0C4DGG9;Q14839	CHD4	-0.223304	0.771433
Surfeit locus protein 4	Q5T8U5;Q5T8U7;O15260;B7Z605;B7Z8F3;B7Z7A8	SURF4	-0.206956	0.771433
Rab GDP dissociation inhibitor alpha	A0A0S2Z3X8;P31150;B4DHX4;B4DH24	GDI1	-0.199032	0.771433
Methylthioribulose-1-phosphate dehydratase	B4DY17;Q96GX9;S4R3D6	APIP	-0.176792	0.771433
Carnitine O-acetyltransferase	P43155	CRAT	0.124071	0.771433
Inactive hydroxysteroid dehydrogenase-like protein 1	I6L975;Q3SXM5	HSDL1	0.133605	0.771433
Malectin	Q14165;F5H1S8;H0YG07	MLEC	0.176249	0.771433
TAR DNA-binding protein 43	A0A0A0N0L3;A0A024R4E2;Q13148;A0A087WX29;B1AKP7;G3V162;A0A087X260;A0A087WYY0;K7EJM5;A0A0A0N0N3;A0A0A0N0M3;B4DRW3;A0A087WXQ5;A0A087WV68	TDP43;TARDBP	0.263735	0.771433
Polypyrimidine tract-binding protein 2	Q9UKA9;B4DSU5;B4DSS8	PTBP2	0.287483	0.771433
5(3)-deoxyribonucleotidase, cytosolic type	V9HWF3;Q8TCD5;J3KRC4;J3KSY6	HEL74;NT5C	0.299439	0.771433
Serine/threonine-protein phosphatase 2A 65 kDa regulatory subunit A alpha isoform	A8K7B7;P30153;B4DDF7;A8K3H8;B4DE69;B4DQY1;Q8NB89;B3KQV6;C9J9C1	PPP2R1A	0.12727	0.772274
NA	A0A0U1RQK4	NA	0.166908	0.772274
Importin subunit alpha-3	O00629	KPNA4	0.230695	0.772944
von Willebrand factor A domain-containing protein 8	A3KMH1;B3KT81	VWA8	-0.126882	0.774024
Ankyrin-2	I6L894;A0A024RDK2;Q01484;A0A024RDI4;B7Z636;E9PHW9;D6RHE1;A0A0U1RQN6;B7Z651	ANK2	0.162963	0.774024
Eukaryotic translation initiation factor 3 subunit B	B4DV79;A4D210;A0A024R821;P55884;B4DXN6;Q96G38;Q86UM1	EIF3B;EIF3S9	0.16965	0.774024
Pyruvate dehydrogenase E1 component subunit beta, mitochondrial	P11177;C9J634	PDHB	-0.0839665	0.775068
NADH-cytochrome b5 reductase;NADH-cytochrome b5 reductase 3;NADH-cytochrome b5 reductase 3 membrane-bound form;NADH-cytochrome b5 reductase 3 soluble form	A0A024R4X0;P00387;Q6ZVI6	CYB5R3	0.113792	0.775068
39S ribosomal protein L4, mitochondrial	K7ES61;A0A024R7C5;Q9BYD3;K7EKI4;K7ELF1;K7ELQ0	MRPL4	0.135007	0.776698
Coronin;Coronin-7	A0A0A6YYL4;P57737;B3KUH7;B3KSY4;B4DKU9	CORO7-PAM16;CORO7;hCG_1787779	0.164851	0.776698
Matrix metalloproteinase-15	A0A024R6U8;P51511;Q7KZY0	MMP15	0.282902	0.776698
Gamma-sarcoglycan	B2RE70;A8K3K5;Q13326	SGCG	0.512321	0.776698
Bleomycin hydrolase	Q13867;K7ES02;K7ESE8;J3KSD8;B4DXF3	BLMH	-0.180806	0.777486
NA	Q59FT7	NA	0.155235	0.778779
Liprin-beta-1	A0A024RB02;Q86W92;F5GZP6;B4DFU8	PPFIBP1	0.216113	0.778779
BAG family molecular chaperone regulator 3	O95817;Q53GY1;C9JFK9	BAG3	-0.184356	0.779237
NADH dehydrogenase [ubiquinone] 1 alpha subcomplex assembly factor 4	Q9P032	NDUFAF4	0.177782	0.78034
Sorting nexin-2	B3KN57;B3KML1;O60749;Q53GG3	SNX2	-0.271249	0.782635
Myosin-11	A0A024QZJ6;A0A024QZJ4;B1PS43;P35749;Q7Z7R0	MYH11	0.261079	0.782635
Glucosidase 2 subunit beta	A0A024R7F1;K7ELL7;B4DJQ5;P14314;A0A0S2Z4D8;A0A0S2Z4W7;A2VCQ4;A0A0S2Z4A0	PRKCSH	0.147904	0.783784
Cysteine-rich protein 2	Q53FN1;P52943;H0YHD8;H0YFA4	CRIP2	-0.29761	0.784033
DnaJ homolog subfamily C member 3	A8KA82;Q13217;X6R9L0	DNAJC3	-0.294529	0.784033
ATP synthase subunit g, mitochondrial	E9PN17;O75964	ATP5L	-0.0926963	0.784033
39S ribosomal protein L47, mitochondrial	Q9HD33	MRPL47	0.131407	0.784033
NADH dehydrogenase [ubiquinone] 1 alpha subcomplex subunit 12	Q9UI09;Q53HG1;F8VRD8	NDUFA12	0.145824	0.784305
NA	G3V325;B4DJ38;C9JJT5	ATP5J2-PTCD1	0.21429	0.785673
Serine/threonine-protein phosphatase;Serine/threonine-protein phosphatase 5	Q9BPW0;H0YDU8;Q53FR0;A0A024R0Q7;P53041;B4DLP6;B2R6R6;A8MU39;B4DDZ8	PPP5C	0.218296	0.785673
Plexin-A3	P51805	PLXNA3	0.26782	0.785673
Heme-binding protein 2	Q05DB4;Q9Y5Z4	HEBP2	-0.289276	0.787877
40S ribosomal protein S11	P62280;M0QZC5	RPS11	-0.0975027	0.787877
Dolichyl-diphosphooligosaccharide--protein glycosyltransferase subunit STT3A	A0A024R3J7;P46977	hCG_2032701;STT3A	-0.274391	0.787946
Cardiac phospholamban	Q5R352;P26678	PLN	0.142638	0.788469
DNA replication licensing factor MCM4	B4DLA6;B3KMX0;A0A024R7U6;P33991	MCM4	0.174966	0.789234
Protein flightless-1 homolog	Q13045;B4DIX0;Q59H95	FLII	0.250673	0.792267
Transcription elongation factor B polypeptide 1	E5RHG8;A0A024R7Y5;Q15369;R4GMY8	TCEB1	-0.164192	0.793237
Small ubiquitin-related modifier;Small ubiquitin-related modifier 2	A0A024R8S3;P61956	SUMO2	-0.260171	0.794647
Laminin subunit beta-2	A0A024R319;P55268	LAMB2	0.102444	0.794647
Dolichyl-diphosphooligosaccharide--protein glycosyltransferase subunit DAD1	F5GXX5;P61803;Q53G02;F5H895;A0A0B4J239	DAD1	0.144907	0.795026
Constitutive coactivator of PPAR-gamma-like protein 1	Q9NZB2	FAM120A	0.158527	0.795026
Zinc finger RNA-binding protein	B2RNR6;Q96KR1	ZFR	0.197509	0.795026
AFG3-like protein 2	D3DUJ0;Q8TA92;Q9Y4W6	AFG3L2	-0.102051	0.795847
Catenin alpha-1	P35221;B4E2G8;G3XAM7;B4DU00;B4DKT9;B3KSR8	CTNNA1	0.0938771	0.795847
60S ribosomal protein L13a	Q5QTS3;P40429;Q9BSQ6;Q53H34;M0QYS1;Q8J015;Q0VGL3	RPL13A;RPL13a	0.1109	0.795847
Ryanodine receptor 2	Q92736;H7BY35	RYR2	0.112729	0.795847
Redox-regulatory protein FAM213A	Q9BRX8	FAM213A	0.139438	0.795847
Coiled-coil domain-containing protein 6	Q05CP8;A0A024QZJ7;Q16204	CCDC6	0.150379	0.795847
Pleiotropic regulator 1	O43660;H0YA24	PLRG1	0.208325	0.795847
28S ribosomal protein S35, mitochondrial	P82673	MRPS35	0.213269	0.795847
DDRGK domain-containing protein 1	Q96HY6;A0A0A0MRX2	DDRGK1	0.214275	0.795847
N-acetylglucosamine-6-sulfatase	B4DTT0;Q7Z3X3;H7C3P4;A8K6V6;A0A024RBC5;F6S8M0;B4E284;P15586;H0YFA9;F5H4C6	DKFZp686E12166;GNS	0.215127	0.795847
Helicase SKI2W	Q9NPK3;O76046;Q15477;Q96BC0;B4E0N1;B4DM01;B4DSY1;A0A024RCU1;Q59F56	SKIV2L;SKI2W	0.216354	0.795847
NA	B4E106	NA	0.230156	0.795847
Ras GTPase-activating protein-binding protein 2	A8K6V7;A0A024RDB2;A0A024RDE5;Q9UN86	G3BP2	0.208264	0.798351
Pre-B-cell leukemia transcription factor-interacting protein 1	B4DV94;B4E1J0;B4E0K4;Q96AQ6	PBXIP1	-0.259987	0.798922
Protein S100;Protein S100-A6	R4GN98;P06703	S100A6	0.139492	0.79916
Vitamin K-dependent protein S	Q9NSD0;Q16519;A0A0S2Z4K3;A0A0S2Z4L3;P07225;G5E9F8;B4E1L6	PROS1	0.212913	0.799174
Phosphoribosylformylglycinamidine synthase	A8K9T9;A8K8N7;O15067	PFAS	0.12163	0.799306
Myoferlin	Q9NZM1;H0YD14	MYOF	-0.172986	0.799861
Protein NipSnap homolog 1	B4DQI7;A8K4I8;Q9BPW8;H7C2U6;F8WCR5	NIPSNAP1	0.164123	0.799861
Thioredoxin domain-containing protein 12	O95881	TXNDC12	0.195127	0.799964
U6 snRNA-associated Sm-like protein LSm6	P62312	LSM6	-0.176277	0.800476
F-actin-capping protein subunit alpha-1	A0A024R0E5;P52907;A8K0T9	CAPZA1	0.23094	0.800476
Phosphoglucomutase-like protein 5	Q15124	PGM5	-0.1372	0.802031
Malic enzyme;NADP-dependent malic enzyme, mitochondrial	E9PMB9;B2R995;Q16798	ME3	-0.103223	0.803487
Septin-7	Q8TC62;E7ES33;Q3LIE9;A4GYY8;E7EPK1;Q16181;B4DUD6;A8K3D0;Q59EY4	SEPT7;Nbla02942;DKFZp686F17268	0.146918	0.803487
Carnitine O-palmitoyltransferase 2, mitochondrial	A0A140VK13;A0A1B0GVF3;P23786;A0A1B0GTB8;A0A1B0GWC0;A0A1B0GV75	CPT2	-0.090089	0.804388
H/ACA ribonucleoprotein complex subunit 4	O60832;C9IYT0;U5UA77	DKC1	-0.203625	0.805822
NA	E5KLM1;E5KLL9;E5KLM2;E5KLM0	NA	-0.136307	0.805822
Tripartite motif-containing protein 55	Q9BYV6	TRIM55	0.217953	0.805822
Beta-taxilin	Q5HYH7;B2RBM1;Q8N3L3;Q5HYK6;H0UI60;H0UI61	DKFZp451B226;TXLNB;DKFZp451H216	0.236159	0.805822
ATP-dependent Clp protease proteolytic subunit, mitochondrial;ATP-dependent Clp protease proteolytic subunit	Q16740;M0R208	CLPP	0.174654	0.80593
WD repeat-containing protein 5	P61964	WDR5	0.241488	0.808313
Mitochondrial import inner membrane translocase subunit Tim8 B	Q9Y5J9;G3XAN8	TIMM8B	-0.149537	0.812043
Endophilin-A2	Q9UQD4;Q6FGM0;Q99961;M0QYE0;M0R0I3	SH3GL1	-0.153355	0.812413
Thymosin beta-4;Hematopoietic system regulatory peptide	A2VCK8;P62328;Q0P5T0;Q0P5U7;Q0P5Q0;Q0P5P4;Q0P5N8	TMSB4X	0.239537	0.812413
Hydroxyacylglutathione hydrolase, mitochondrial	H3BPK3;B4DT01;Q16775;H3BPQ4;H3BQW8	HAGH	0.164741	0.81438
Calcium-regulated heat stable protein 1	Q9Y2V2;H3BSW7;H3BUY4;H3BPY5;H3BNU9;H3BTK3;I3L3X8	CARHSP1	-0.113	0.814919
Splicing factor U2AF 35 kDa subunit	P0DN76;B5BU08;Q01081	U2AF1	-0.199187	0.815031
Paraplegin	Q9UQ90	SPG7	-0.127906	0.815031
Glycerol-3-phosphate dehydrogenase;Glycerol-3-phosphate dehydrogenase, mitochondrial	Q53T76;A0A140VJK2;P43304;A8K1Z2;B7Z601	GPD2	0.181378	0.816063
Cleavage and polyadenylation specificity factor subunit 7	F5H669;B4DGF8;Q8N684;F5H6M0;F5H047	CPSF7	-0.183857	0.816572
5-AMP-activated protein kinase catalytic subunit alpha-1	Q13131;Q96E92	PRKAA1	-0.126237	0.816572
WD40 repeat-containing protein SMU1;WD40 repeat-containing protein SMU1, N-terminally processed	A0MNN4;Q2TAY7	SMU1	-0.122939	0.816572
Platelet-activating factor acetylhydrolase IB subunit alpha	P43034;B4DZN3	PAFAH1B1	-0.0956041	0.816572
KN motif and ankyrin repeat domain-containing protein 2	Q63ZY3	KANK2	0.160165	0.816572
Transmembrane protein 43	A0A024R2F9;Q9BTV4;A0A0S2Z5N2;Q8TEP9	TMEM43;FLJ00144	0.238335	0.816572
Alpha-1-antitrypsin;Short peptide from AAT	E9KL23;P01009	SERPINA1	0.38504	0.816572
B-cell receptor-associated protein 31	Q53HT6;Q53G72;P51572;C9JSP1;C9JQ75;C9J0M4;C9JMD7	BCAP31	-0.18373	0.817035
STE20-like serine/threonine-protein kinase	Q9H2G2	SLK	-0.176231	0.817035
Transcription elongation factor SPT5	B4E0Q4;B4DZJ7;O00267;B4DJK4	SUPT5H	-0.137767	0.817035
Protein SCO2 homolog, mitochondrial	O43819	SCO2	0.120888	0.817035
Endonuclease G, mitochondrial	E5KNL5;Q14249	ENDOG	0.180268	0.817035
CLIP-associating protein 1	F8WA11;Q7Z460;B7Z5R7;B7Z4E5;B7Z7Q8;H0Y5T1;Q68D09;B7Z2P0	CLASP1;DKFZp686D1968	-0.351853	0.818076
Junction plakoglobin	A0A0S2Z487;A0A024R1X8;P14923	JUP	-0.0768945	0.818076
39S ribosomal protein L46, mitochondrial	Q9H2W6	MRPL46	0.222923	0.818076
Cytochrome c1, heme protein, mitochondrial	Q8TBT6;P08574	CYC1	0.100153	0.820205
Kelch-like protein 41	O60662;B2RE63;Q3ZTS6	KLHL41;SARCOSIN	0.160682	0.822271
SWI/SNF-related matrix-associated actin-dependent regulator of chromatin subfamily E member 1	J3QKS7;B4DGM3;A0A024R1S7;Q969G3;K7EMQ8;H7C048	SMARCE1	0.255612	0.822416
Eukaryotic translation initiation factor 3 subunit F	B4DMT5;B3KSH1;O00303;B4DEW9	EIF3F	0.153648	0.822725
Poly(A) RNA polymerase, mitochondrial	Q9NVV4	MTPAP	0.135774	0.822875
39S ribosomal protein L50, mitochondrial	Q8N5N7	MRPL50	0.174979	0.822875
Protein FAM49B	A0A024R9G4;Q9NUQ9;Q68D08	FAM49B;DKFZp686B04128	-0.206481	0.823005
Arginase;Arginase-2, mitochondrial	A0A024R6A0;P78540	ARG2	0.184111	0.823005
Proteasome activator complex subunit 1	A0A0K0K1L8;Q06323;Q6FHU3	PSME1	0.101934	0.82337
NA	J3KNF8	CYB5B	-0.158275	0.824008
Superoxide dismutase [Cu-Zn]	V9HWC9;P00441;H7BYH4	HEL-S-44;SOD1	-0.175743	0.827169
Insulin-like growth factor 2 mRNA-binding protein 3	O00425	IGF2BP3	0.175676	0.827628
DnaJ homolog subfamily A member 3, mitochondrial	Q59E88;Q53G26;Q96EY1;B3KM81	DNAJA3	-0.102312	0.827781
Histone H3.2;Histone H3.1;Histone H3;Histone H3.3;Histone H3.3C	Q71DI3;P68431;B4E380;K7EK07;B2R4P9;P84243;K7EMV3;B4DEB1;B2R6Y1;A8K4Y7;K7ES00;Q6NXT2	HIST2H3A;HIST1H3A;H3F3B;H3F3A;H3F3C	0.118344	0.827862
ADP-ribosylation factor 6	Q5U025;P62330;Q6FH17	ARF6	0.138049	0.827862
DNA helicase;DNA replication licensing factor MCM3	Q53HJ4;B2R7C5;A0A0S2Z4T1;P25205;A0A0S2Z492;Q8NHX6;B4DUQ9;J3KQ69;B4DS46	MCM3;HCC5	-0.209505	0.830768
UTP--glucose-1-phosphate uridylyltransferase	Q16851;B2RAN1;A0A087WYS1;E7EUC7;B4DUP2;Q53QE9	UGP2	-0.0504668	0.830768
Lysophospholipid acyltransferase 5	Q6P1A2;F5H0M4	LPCAT3	-0.310303	0.833661
Vacuolar protein sorting-associated protein 13C	Q709C8	VPS13C	-0.282257	0.833661
[Pyruvate dehydrogenase [acetyl-transferring]]-phosphatase 1, mitochondrial	B3KPZ7;A0A024R9C0;B4DYX8;Q6P1N1;Q9P0J1	PPM2C;PDP1	-0.207996	0.833661
Non-specific lipid-transfer protein	B2R761;P22307;B4E0J3;H0YF61	SCP2	-0.204861	0.833661
Glutathione synthetase	V9HWJ1;P48637;B7Z1C5;B7Z514	HEL-S-64p;GSS	-0.171138	0.833661
Polyadenylate-binding protein;Polyadenylate-binding protein 4	Q6IQ30;B1ANR0;Q13310;H0Y5F5	PABPC4	-0.134909	0.833661
Neuroplastin	Q9UFM8;Q9Y639;Q9Y499	DKFZp566H1924;NPTN	-0.134724	0.833661
60S ribosomal protein L21	Q6IAX2;P46778;Q59GK9;G3V1B3;M0R181	RPL21	-0.11166	0.833661
2,4-dienoyl-CoA reductase, mitochondrial	A0A024R9D7;Q16698	DECR1	-0.094595	0.833661
Proteasome subunit alpha type-5;Proteasome subunit alpha type	A0A109NGN6;P28066;Q5U0A0	PSMA5	0.0601202	0.833661
Quinone oxidoreductase PIG3	Q53FA7;H7BZH6;B4DMQ7	TP53I3	0.100701	0.833661
Eukaryotic translation initiation factor 3 subunit J	A0A024R5S5;O75822	EIF3S1;EIF3J	0.164745	0.833661
NAD-dependent protein deacetylase sirtuin-3, mitochondrial	E9PM75;B7Z5J1;Q9NTG7;E9PK80;B7Z580;B7Z7G4;E9PN58;B7Z777	SIRT3	0.166609	0.833661
Cleavage and polyadenylation specificity factor subunit 6	F8WJN3;Q16630;B4DSU9	CPSF6	0.173794	0.833661
Nucleobindin-2;Nesfatin-1	E9PKG6;V9HW75;A0A087WSV8;P80303;Q2L696;E9PLR0;E9PLE9	NUCB2;HEL-S-109;Nucb2	0.202	0.833661
CTP synthase;CTP synthase 2	A0A024RC00;Q9NRF8	CTPS2	0.209896	0.833661
DNA mismatch repair protein Msh6	P52701;A0A087WWJ1;Q1L838	MSH6;GTBP	0.230059	0.833661
Protein S100-A4	P26447	S100A4	0.255754	0.833661
Fatty aldehyde dehydrogenase	P51648;J3QRD1;Q59H65;Q68D64;I3L1M4	ALDH3A2;DKFZp686E23276	-0.110503	0.834031
Ras-related protein Rab-9B	Q9NP90	RAB9B	0.107407	0.834031
Serine/arginine repetitive matrix protein 2	A0A140VK53;Q9UQ35;O60382	SRRM2;KIAA0324	0.189516	0.836782
NADH dehydrogenase [ubiquinone] 1 alpha subcomplex subunit 10, mitochondrial	E7ESZ7;Q7Z518;A8K413;A0A087WXC5;A0A024R4B3;O95299;Q53SW4	NDUFA10	-0.0852588	0.837457
Basic leucine zipper and W2 domain-containing protein 2	B7Z4K8;E7ETZ4;B3KM68;A0A024RA42;Q9Y6E2;Q75MG1;B5MCH7;B5MCE7;E9PFD4	BZW2	0.145138	0.837457
26S proteasome non-ATPase regulatory subunit 4	P55036;A6PVX3	PSMD4	-0.120184	0.837962
RNA-binding protein 10	A0A0S2Z4X1;A0A0S2Z4W4;Q7Z3D7;A0A0A0MR66;P98175;Q6PKH5	DKFZp686E2459;RBM10	0.164115	0.837962
Bcl-2-associated transcription factor 1	E9PK09;E9PQN2;E9PKI6;E9PK91;Q9NYF8;Q6DCA8;E9PJA7	BCLAF1	0.20691	0.839412
Dipeptidyl peptidase 3	Q5JPB8;G3V1D3;G3V180;Q9NY33;Q53HL4;Q53GT4;B4E357	DKFZp686O1117;DPP3	-0.204837	0.839998
Gamma-glutamylcyclotransferase	A0A090N7V5;O75223;M0QZK8;B8ZZK2;B3KMN7	C7orf24;GGCT	-0.164506	0.839998
Isocitrate dehydrogenase [NAD] subunit, mitochondrial;Isocitrate dehydrogenase [NAD] subunit beta, mitochondrial	A0A087WZN1;O43837;A0A087X2E5	IDH3B	0.100241	0.840058
Vesicle-fusing ATPase	I3L0N3;B7Z5J7;P46459;B4DGR3;B7Z9U2;B4DH19;B4DSK5	NSF	0.125372	0.840058
Parathymosin	A0A158RFU3;P20962;O15256;A2VCM6	PTMS	-0.175885	0.840595
Interleukin enhancer-binding factor 2	B4DY09;F4ZW62;Q12905;Q53FG3;F4ZW63	ILF2	-0.114413	0.840595
Long-chain fatty acid transport protein 6	B2R8P6;Q9Y2P4	SLC27A6	0.109234	0.841835
Dynein light chain Tctex-type 1	P63172;Q5VTU3	DYNLT1	0.152452	0.841835
cAMP-dependent protein kinase type I-alpha regulatory subunit;cAMP-dependent protein kinase type I-alpha regulatory subunit, N-terminally processed	Q68DQ4;B2R5T5;P10644;K7EPB2	DKFZp779L0468;PRKAR1A	0.0999945	0.84248
28S ribosomal protein S22, mitochondrial	G5E9W7;G5E9V5;P82650;Q8NBL6;A8K9Y7;H7C5F2;H7C5H3	MRPS22	0.112897	0.845565
Nucleolysin TIAR	O15187;Q2TSD2;A8K5C4;Q01085;A6NKZ9;E7ETJ9;E7ETC0;Q59G49;Q49AS9	TIAL1	0.164493	0.850715
Rab3 GTPase-activating protein non-catalytic subunit	Q9H2M9	RAB3GAP2	-0.146789	0.851895
NADH dehydrogenase [ubiquinone] 1 beta subcomplex subunit 5, mitochondrial	E7EWP0;D3DNS1;B2R9L0;H0Y886;O43674;Q05D62	NDUFB5	0.104164	0.852814
Collagen alpha-1(XV) chain;Restin;Restin-2;Restin-3;Restin-4	A0A087X0K0;P39059;B3KTP7	COL15A1	0.36797	0.852828
Protein NDRG2	Q9UN36;G3V5H8;G3V4S9;Q8TDR6;A0A0A0MS87;G3V578;H0YJT9;G3V5L7;G3V2I9	NDRG2	-0.139859	0.853349
Target of Myb protein 1	B4DKQ5;O60784;B4DJ44;B3KUF5	TOM1	0.184564	0.853687
Very-long-chain (3R)-3-hydroxyacyl-CoA dehydratase 3	Q9P035;H3BS72;H3BPZ1	HACD3	-0.122983	0.853847
DnaJ homolog subfamily C member 8	O75937	DNAJC8	0.214269	0.854244
Aflatoxin B1 aldehyde reductase member 2	H3BLU7;V9HWA2;O43488	AKR7A2;HEL-S-166mP	-0.140782	0.855223
Myosin light chain kinase 3	Q32MK0	MYLK3	-0.122733	0.859867
Voltage-dependent calcium channel subunit alpha-2/delta-2;Voltage-dependent calcium channel subunit alpha-2-2;Voltage-dependent calcium channel subunit delta-2	C9JE82;C9JVC9;Q9NY47	CACNA2D2	-0.169455	0.859913
Superoxide dismutase;Superoxide dismutase [Mn], mitochondrial	Q7Z7M4;A0A0C4DFU2;P04179;Q7Z7M6;Q4ZJI1;Q7Z7M7;F5H3C5;F5H4R2;A0A0C4DFU1;F5GYZ5;Q7Z7M5;G8JLJ2;A0A0C4DG56	SOD2	0.087949	0.860821
Kinesin light chain 1	Q7RTQ9;Q7RTQ7;G5E9S8;G3V2E7;B5BU63;Q7RTQ8;Q7RTQ2;G3V3H3;Q7RTQ1;Q7RTQ0;G3V5R9;Q7RTP8;E7EVH7;Q07866;F8W6L3;B4DGB3;Q7RTQ4;B4DS14;Q7Z5D5	KNS2;KLC1	0.195461	0.860821
NADH dehydrogenase [ubiquinone] 1 beta subcomplex subunit 8, mitochondrial	O95169;K9J7I2;E9PQ68	NDUFB8	0.132933	0.860876
39S ribosomal protein L22, mitochondrial	E7ESL0;J3KQY1;Q9NWU5	MRPL22	-0.170571	0.861304
Cytochrome c oxidase subunit 5B, mitochondrial	P10606;Q6FHM4;Q6FHJ9	COX5B	-0.106664	0.861304
Protein-cysteine N-palmitoyltransferase HHAT-like protein	A0A024R2M3;Q9HCP6	GUP1;HHATL	-0.115231	0.863712
Peptidyl-prolyl cis-trans isomerase FKBP10	A0A024R1W3;Q96AY3;B4DJJ5;Q658U4;Q8NAG5;Q6ZME7;H0Y827	FKBP10;DKFZp666D193	0.135655	0.863712
Alpha-actinin-4	A0A0S2Z3G9;O43707;Q96BG6	ACTN4	0.128329	0.864264
Programmed cell death protein 10	Q9BUL8;C9J5C3;H7C5M9;C9JSA3;C9JND6;C9J363;C9J6F3	PDCD10	0.109666	0.865013
Peptidyl-prolyl cis-trans isomerase;Peptidyl-prolyl cis-trans isomerase F, mitochondrial	B2R6X6;A0A024QZS4;P30405	PPIF	0.0791656	0.867017
Mitochondrial-processing peptidase subunit beta	Q96CP5;B3KM34;O75439;A8K1E9;G3V0E4;B4DM90;Q9UG64;B3KQ85	PMPCB;DKFZp586I1223	0.0967277	0.867017
39S ribosomal protein L2, mitochondrial	Q5T653;C9IY40;B4DVE2	MRPL2	0.103777	0.867017
AP-2 complex subunit sigma	M0R0N4;M0QYZ2;P53680;M0QZ21;X6R390	AP2S1	-0.201927	0.867348
N-alpha-acetyltransferase 15, NatA auxiliary subunit	A0A0B4J1W3;B2RBE5;Q9BXJ9;B4E2T6;Q58F05	NAA15;NARG1	-0.151279	0.868794
NA	Q5D044;H0UI49;B7Z938	LAMA4	-0.121723	0.868794
Ras GTPase-activating protein-binding protein 1	Q6FI03;Q5U0Q1;Q13283;Q32P45;Q53HH4;B7Z8K4	G3BP;DKFZp686L1159;G3BP1	-0.073658	0.868794
Nidogen-1	P14543	NID1	-0.0594438	0.868794
Endoplasmic reticulum aminopeptidase 1	A8K6H1;A0A0A7E7X3;A0A0A7E7W9;A0A0A7E7W5;A0A0A7E7T3;A0A0A7E7S5;A0A0A7E6P9;A0A0A7E6P4;A0A0A7E6P0;A0A0A7E6I2;A0A0A7E6D8;A0A0A7E6D4;A0A024RAR8;Q9NZ08;A0A0A7E6K0;A0A0A7E6J5;A0A075BV59;A0A075BSP6;A0A075BTL2	ERAP1;ARTS-1	0.0888542	0.868794
Glutamine--tRNA ligase	Q53HS0;P47897;A8K3A8;B4DNN3	QARS	0.110137	0.868794
Poly(ADP-ribose) glycohydrolase ARH3	Q9NX46;B4DHV5;B7ZAN4	ADPRHL2	0.157774	0.868794
U1 small nuclear ribonucleoprotein A	B2R802;P09012;M0R268;M0QXK2;M0R221;M0R2B8;M0R0G9;B4DDC7	SNRPA	-0.143465	0.869502
Protein TBRG4	D3DVL7;B4DU42;Q969Z0;B3KRS4;B3KMT3;B3KM73;C9J7P5;C9IZN7	TBRG4	-0.134628	0.870025
Proteasome subunit beta type-4	A0A140VK46;P28070;B4DFL3	PSMB4	-0.130606	0.870025
Mitochondrial import inner membrane translocase subunit Tim21	A8K1K8;Q9BVV7	C18orf55;TIMM21	-0.100372	0.870025
Methylosome protein 50	A0A024R0H7;Q9BQA1;H0Y711	WDR77	0.0799503	0.870025
GrpE protein homolog 1, mitochondrial;GrpE protein homolog	Q9HAV7;B4DWV5	GRPEL1	0.111152	0.870025
U1 small nuclear ribonucleoprotein 70 kDa	A0A024QZD5;P08621;A8KAQ5;M0QYR1	SNRP70;SNRNP70	0.15253	0.870025
Cadherin-13	B7Z9B1;P55290	CDH13	-0.259242	0.870471
Cytochrome c oxidase subunit 2	Q7Y6N0;Q4GVP5;C8YBL1;A0A097PWR7;Q14XT3;X2D4U2;H9E7F7;H9E7P8;A0A1B1PEQ8;H9E7W2;H9E7T7;H9PDV6;X5C6M5;X5BKA4;X2CK15;W8DFH5;W8DBX9;W8D1X2;V9K571;V9JPM6;V9J3S1;U5Z9R9;U5Z487;U3LSI8;U3L556;T1SWS8;T1Q632;S4STI1;R9Y412;Q9B2U8;Q9B138;Q8WCW3;Q8HNR1;Q85KS0;Q7YCE6;Q7Y6M3;Q6VJJ3;Q6VJD8;Q6VIG7;Q6RQ80;Q6RNN7;Q6RKW8;Q6R0V6;Q5SB08;Q5SAP1;Q5SA98;Q5S971;Q4GQP0;Q4GHE1;Q4GCZ4;Q4GCG2;Q4GCC3;Q4F4V6;Q4EZD4;Q305H0;Q19MP7…	COX2;COII;cox2;MT-CO2	-0.104028	0.870582
Cytochrome c oxidase subunit 6B1	P14854	COX6B1	0.183449	0.870582
Serine/threonine-protein phosphatase 2A 56 kDa regulatory subunit alpha isoform	Q15172	PPP2R5A	0.104182	0.870979
28S ribosomal protein S29, mitochondrial	P51398;V9GYL9;V9GYJ9;V9GZ03;V9GYW1;V9GYA7	DAP3	-0.146218	0.873076
L-lactate dehydrogenase;L-lactate dehydrogenase B chain	Q5U077;P07195;A8MW50;C9J7H8	LDHB	-0.0479697	0.873076
Caseinolytic peptidase B protein homolog	A0A140VK11;Q9H078;H0YGM0;Q7Z777	CLPB	0.157677	0.873076
Serine/threonine-protein phosphatase PGAM5, mitochondrial	Q96HS1	PGAM5	-0.0607995	0.87429
3(2),5-bisphosphate nucleotidase 1	V9HWF9;O95861;A6NF51;F8W1J0;B7Z9J7	HEL20;BPNT1	0.0927221	0.87429
Vacuolar protein sorting-associated protein 29	Q5JPE4;F8VXU5;Q9UBQ0	DKFZp667O202;VPS29	-0.228451	0.875603
NADH dehydrogenase [ubiquinone] 1 beta subcomplex subunit 3	A0A024R413;O43676;C9JKQ2	NDUFB3	0.0776946	0.875603
Methionine adenosyltransferase 2 subunit beta	A0A140VJP2;Q9NZL9;A8K7A4;E5RJR3;H7C0X7	MAT2B	0.0888364	0.875603
N(G),N(G)-dimethylarginine dimethylaminohydrolase 1	B1AKK2;O94760;B4E3V1;B4DYP1;B4DGT0	DDAH1	0.102997	0.875603
Lanosterol synthase;Terpene cyclase/mutase family member	P48449;B2R694;A0A0G2JQD0	LSS	0.106294	0.875603
60S ribosomal protein L7	P18124;A0A024R814;A8MUD9	RPL7	0.0510215	0.876494
Splicing factor 3A subunit 2	Q05DF2;Q15428;K7EMT0	SF3A2	0.117211	0.877637
Pleckstrin homology domain-containing family A member 5	A0A024RAY7;Q9HAU0;B4DHK5;A0JP02;B4DMB9;B4DJX4	PLEKHA5	0.143373	0.879105
Calponin;Calponin-1	V9HWA5;P51911;Q53FP8;B7Z7E1;K7EQ72	HEL-S-14;CNN1	-0.174276	0.879129
Lon protease homolog, mitochondrial;Lon protease homolog	K7EJE8;K7EKE6;B3KU28;Q2VPA0;B3KXS5;E5KMI6;P36776;B4DPX0	LONP1	0.0637112	0.879181
Cytosol aminopeptidase	V9HW38;P28838;B4DQG5;H0Y9Q1	HEL-S-106;LAP3	0.0855157	0.879181
39S ribosomal protein L37, mitochondrial	Q9BZE1;S4R369	MRPL37	0.0855941	0.879181
Succinate dehydrogenase [ubiquinone] iron-sulfur subunit, mitochondrial	P21912;A0A087WWT1;A0A087WXX8	SDHB	0.0744632	0.879598
Glutathione S-transferase Mu 3	Q6FGJ9;P21266;A0A0A0MTN3;A4UJ43;Q59EJ5;B4E2J2	GSTM3	-0.0792276	0.879876
Very-long-chain enoyl-CoA reductase	Q9NZ01;B3KM97;B3KSQ1	TECR	-0.173687	0.882196
Short-chain specific acyl-CoA dehydrogenase, mitochondrial	E5KSD5;D4QEZ8;P16219;E5KSE7;E9PE82;B4DUH1	ACADS	-0.0890242	0.882196
Tyrosine-protein kinase receptor;Protein TFG	Q05BK6;Q7Z426;Q8TDJ5;Q92734;C9JJP5;C9JUE0;C9JTY3;Q7Z427	TFG;TFG/ALK fusion	0.0958714	0.882196
Squamous cell carcinoma antigen recognized by T-cells 3	Q15020;F8VV04;B4DRG9;B4E3R6	SART3	0.116607	0.882196
Lamin-B receptor	A0A024R3R5;Q14739;C9JXK0	LBR	0.1336	0.882196
Signal peptidase complex subunit 2	B4DDB9;A0A087WUC6;E9PI68;Q15005;E9PL01	SPCS2	0.138195	0.882196
Tripeptidyl-peptidase 1	B4DSE2;B4E0C7;Q53HP2;D3DQU2;O14773;B2R608;B4DE89	TPP1	0.0916247	0.883944
Copine-3	A0A024R994;O75131;Q05DL8;A0A087WYQ3;E5RHZ0	CPNE3	0.0918746	0.883944
DDB1- and CUL4-associated factor 7	P61962;B4DH46;A0A087WWI6	DCAF7	0.0708273	0.884048
Mitochondrial import inner membrane translocase subunit Tim10	P62072	TIMM10	0.153155	0.884048
Hydroxymethylglutaryl-CoA lyase, mitochondrial	B1AK13;P35914	HMGCL	0.0872384	0.885324
NADH dehydrogenase [ubiquinone] 1 beta subcomplex subunit 9	Q9Y6M9;E9PH64	NDUFB9	-0.0673425	0.888159
Cullin-1	B4DLA3;A0A0C4DGX4;A0A090N7U0;Q13616;Q75MQ1;B3KTW0	CUL1	0.0841937	0.890516
Synemin	O15061;A0A075B7B1;H0YL34	SYNM	0.0615623	0.890991
Hepatoma-derived growth factor-related protein 3	A0A024R216;Q9Y3E1	HDGFRP3	0.113461	0.890991
UPF0317 protein C14orf159, mitochondrial	Q6IA66;B3KVU6;Q4LE40;Q7Z3D6;Q53HP9;H0YB09;A0A0C4DGD4;H0YB62	C14orf159;C14orf159 variant protein	-0.124983	0.891644
Ras-related protein Rab-1B	Q9H0U4;Q6FIG4;E9PLD0;Q9H1C9	RAB1B	-0.105295	0.891644
rRNA 2-O-methyltransferase fibrillarin	Q96BS4;P22087;M0R299;M0QXL5;M0R2Q4;B4DLD4;M0R0P1	FBL	-0.0802152	0.891644
NA	Q53G79	NA	-0.0762988	0.891644
ATP-dependent (S)-NAD(P)H-hydrate dehydratase	B4DKX7;A0A024RDX4;Q8IW45;B3KSJ9	CARKD;FLJ10769	0.0900752	0.891644
26S proteasome non-ATPase regulatory subunit 2	Q13200;Q59EG8;B4DM22;Q9NSM5;Q13041	PSMD2;DKFZp564A2282	0.0692171	0.89172
Acylglycerol kinase, mitochondrial	E9PC15;B4E2Z8;A4D1U5;Q53H12;E9PG39;B4DR72	AGK;FLJ10842	0.0693304	0.89172
Actin-like protein 6A	Q6FI97;Q53FS0;O96019;H7C5S0	BAF53A;ACTL6A	-0.139412	0.892251
DnaJ homolog subfamily A member 1	P31689;B7Z5C0;Q9NXZ8	DNAJA1;HDJ2	-0.108622	0.892251
10 kDa heat shock protein, mitochondrial	P61604;Q9UNM1;B8ZZL8;A0A024R3X7	HSPE1;EPFP1	0.0577647	0.892251
Ezrin	Q6NUR7;E7EQR4;P15311;V9HW42;B2R6J2;B7Z5V2;B7Z437	EZR;HEL-S-105	0.0696953	0.892251
Stress-induced-phosphoprotein 1	V9HW72;A8K690;P31948	HEL-S-94n;STIP1	0.0699952	0.892251
N-acetylserotonin O-methyltransferase-like protein	O95671;B4DRF1;B3KM43;B4DN81	ASMTL	0.0726463	0.892251
Phosphofurin acidic cluster sorting protein 1	A0A024R5H6;Q6VY07;B4DF77	PACS1	0.0763522	0.892251
Septin-5	G3XAH0;Q59GE1;C9JM82;B4DJ62;X5DNA9;Q7KYV2;Q99648;Q99719;E7EPG2;E7EX32	SEPT5;CDCrel-1	0.0852074	0.892251
Src substrate cortactin	A0A024R5M3;Q14247;Q53HG7;Q76MU0	CTTN;EMS1	0.0997607	0.892251
Integrin beta-1-binding protein 2	Q9UKP3	ITGB1BP2	0.154257	0.892251
Hydroxysteroid dehydrogenase-like protein 2	Q6YN16;B2R923;A0A024R159;B4E136	HSDL2	0.0726341	0.892282
Xaa-Pro dipeptidase	J3K000;A0A140VJR2;P12955	PEPD	0.0548557	0.892737
Elongation factor Ts, mitochondrial	B4DHY8;E5KS95;P43897	TSFM	-0.12256	0.893917
Proteasomal ubiquitin receptor ADRM1	Q68E00;Q16186;B4DMP7;A0A087WX59	DKFZp686G2045;ADRM1	0.0939177	0.894719
CUGBP Elav-like family member 2	E9PC62;A0A0J9YXJ0;B4DT00;B4DDE7;Q5VZZ6;B2RA86;B4DS31;A0A0J9YX66;A0A1B0GU44;A0A1B0GUN8;O95319;V9GYD9;B4DSZ2	CELF2	0.155539	0.894719
High mobility group protein B1	A0A024RDR0;P09429;Q5T7C4;B7Z965;Q59GW1;B3KQ05	HMGB1	-0.106261	0.895884
NA	A0A0A0MRL6;F8W8M4;J3QSX6	ABLIM1	-0.0610998	0.896412
Protein scribble homolog	A0A0G2JNZ2;A0A0G2JPP5;Q14160;A0A0G2JMS7	SCRIB	0.0987834	0.896628
Spectrin beta chain, non-erythrocytic 1	B2ZZ89;Q01082;A0A087WUZ3;D6W5C0;K9MS24	SPTBN1	-0.0413419	0.898225
Arginyl-tRNA--protein transferase 1	B4E107;B2R7P0;F5GXE4;B4DR48;B4DK25;H0Y5C2;O95260;Q5SQQ1	ATE1	0.0901013	0.898225
Protein disulfide-isomerase A4	A0A090N8Y2;P13667	ERP70;PDIA4	0.119216	0.898225
Iron-sulfur cluster assembly 2 homolog, mitochondrial	Q86U28	ISCA2	0.0750038	0.898536
Plakophilin-2	Q99959;B8QGS9	PKP2	0.0732328	0.89885
Exportin-1	O14980;B7ZB16;B3KWD0;B4DR01	XPO1	-0.0792881	0.899299
28S ribosomal protein S28, mitochondrial	A0A0S2Z5D2;A0A0S2Z563;A0A0S2Z5H0;Q9Y2Q9;H0YAT2;H7C5V3;Q53G62;E5RGC7;E5RFH3	MRPS28	0.0723232	0.899299
Splicing factor 3A subunit 3	B3KY12;A8K7V1;A8K566;Q12874;Q53HM6;B4DW90	SF3A3	-0.0739245	0.901319
Cytoplasmic dynein 1 heavy chain 1	Q14204	DYNC1H1	-0.0426876	0.901319
GTP-binding protein SAR1b	Q53F37;Q9Y6B6;D6RD69;Q9H029;D6RDB2	SAR1B;DKFZp434B2017	0.0891104	0.902314
Alpha-aminoadipic semialdehyde dehydrogenase	A0A1B0GTG2;A0A1B0GW77;P49419;A0A1B0GUA1;A0A1B0GW82;A0A1B0GTY9;A0A1B0GTJ4;A0A1B0GV49;A0A140T9V3;A0A0J9YWF7	ALDH7A1	0.0529512	0.902856
Protein FAM98B	Q52LJ0	FAM98B	0.0746113	0.902856
PC4 and SFRS1-interacting protein	O75475;Q05CM9	PSIP1	0.140062	0.903445
Signal transducer and activator of transcription;Signal transducer and activator of transcription 3	B5BTZ6;P40763;G8JLH9;B4DNP0;B7ZA24;B4DVR6	STAT3	0.0796498	0.903919
Fructose-bisphosphate aldolase;Fructose-bisphosphate aldolase C	A0A024QZ64;P09972;B7Z3K9;B7Z1Y2;B7Z1N6;A8MVZ9;B7Z3K7;J3KSV6;J3QKP5;C9J8F3	ALDOC	0.105897	0.904644
NA	Q6ZR64;K7EQX8	MXRA7	-0.0638255	0.905261
Nuclear pore membrane glycoprotein 210	Q8TEM1	NUP210	-0.1058	0.905365
Myristoylated alanine-rich C-kinase substrate	P29966;Q6NVI1	MARCKS	-0.122719	0.905934
Thioredoxin-related transmembrane protein 4	Q9H1E5;E9PIN7	TMX4	0.122857	0.905934
[Pyruvate dehydrogenase (acetyl-transferring)] kinase isozyme 2, mitochondrial	Q15119;B4DLP2;D6RDN9	PDK2	-0.10307	0.907087
ES1 protein homolog, mitochondrial	A0A140VKB0;A0A0B4J2D5;A0A096LPI6;P30042;A0A096LNH5;A0A0B4J2H4;H7C1F6;H7C2G3	C21orf33	-0.0411427	0.909912
THO complex subunit 2	Q8NI27;A0A0C4DG98	THOC2	0.0566829	0.911024
Myeloid-derived growth factor	M0QXF7;M0QYN0;Q969H8	MYDGF	-0.139095	0.915379
Coatomer subunit gamma-2;Coatomer subunit gamma	A0A140VK12;Q9UBF2;Q9H9B7;Q9NUP3	COPG2	-0.098155	0.915379
Metastasis-associated protein MTA2	A0A024R534;O94776	MTA2	-0.0774986	0.915379
Mitochondrial import receptor subunit TOM70	O94826;B4DZ87;B3KQK5;B3KQK0	TOMM70A	-0.067074	0.915379
ATP synthase-coupling factor 6, mitochondrial	Q6IB54;P18859;Q6NZ59;A8MUH2	ATP5J	-0.0471565	0.915379
Acyl-coenzyme A thioesterase 13;Acyl-coenzyme A thioesterase 13, N-terminally processed	Q9NPJ3	ACOT13	-0.0397307	0.915379
Ubiquitin carboxyl-terminal hydrolase;Ubiquitin carboxyl-terminal hydrolase 14	B2RD79;P54578;A6NJA2;D3DUG9;B3KTG4	USP14	0.0744483	0.915379
Melanoma inhibitory activity protein 3	Q5JRA6;A0A0A0MRH6	MIA3	0.0761347	0.915379
Non-specific serine/threonine protein kinase;Serine/threonine-protein kinase MRCK beta	A0A024R6N2;Q9Y5S2	CDC42BPB	0.0935268	0.915379
Adenine phosphoribosyltransferase	P07741;H3BQZ9;H3BQF1;H3BQB1;H3BSW3	APRT	0.0961545	0.915379
Dystrobrevin alpha;Dystrobrevin	Q9Y4J8;A0A024RC32;B7Z3X3;M0QZ28;M0R021	DTNA	0.0801904	0.91555
Chromobox protein homolog 1	J3KS05;Q6IBN6;P83916;B5MD17;K7ELA4	CBX1	-0.0763578	0.915791
Transmembrane protein 256	K7ENI6;K7ERE1;Q8N2U0	TMEM256	0.0436244	0.916663
Alanine--tRNA ligase, mitochondrial	Q5JTZ9	AARS2	-0.0896196	0.920207
Transmembrane 9 superfamily member 4	A0A0C4DFM1;A0A024QYR3;Q92544;B4DKC1;B4DYH6;B4DH88	TM9SF4	0.0816628	0.921069
60S ribosomal protein L35	P42766;F2Z388;A4D2M5;A0A024R866	RPL35;LOC154880	-0.0929583	0.921917
L-2-hydroxyglutarate dehydrogenase, mitochondrial	A8K9B2;Q9H9P8;C9JVN9	L2HGDH	-0.0901878	0.921917
Probable global transcription activator SNF2L1	Q86UA8;A0A0A0MRP6;B7ZLQ5;P28370;D7EZH4	SMARCA1	-0.0814946	0.921917
Phosphatidylinositol transfer protein alpha isoform	V9HWC5;F5GWE5;Q6NUL6;Q00169;B4E1U1;I3L4H1;I3L471;I3L4C0;I3L4U7;I3L459	HEL-S-36;PITPNA	-0.0805904	0.921917
Protein phosphatase 1 regulatory subunit 12B;Protein phosphatase 1 regulatory subunit	A0A0A0MS24;O60237;A0A024R998;A0A024R9B2	PPP1R12B	-0.0614503	0.921917
Aconitate hydratase;Cytoplasmic aconitate hydratase	V9HWB7;P21399;Q9HBB2;Q59FI0	HEL60;ACO1;IRP1	-0.0548663	0.921917
Peroxisomal multifunctional enzyme type 2;(3R)-hydroxyacyl-CoA dehydrogenase;Enoyl-CoA hydratase 2	B2R659;A0A0S2Z4J1;P51659;E7EWE5;B4DSD0;B4DDM5;E7ER27;G5E9S2;E7ET17;B4DI68;B3KSP2	HSD17B4	-0.0416816	0.921917
Phosphorylase b kinase regulatory subunit beta	Q93100	PHKB	-0.176323	0.923105
Histone deacetylase;Histone deacetylase 2	B3KUJ5;Q92769	HDAC2	-0.101918	0.924711
Lamina-associated polypeptide 2, isoform alpha;Thymopoietin;Thymopentin	P42166	TMPO	0.0430342	0.924744
Cytochrome c oxidase protein 20 homolog	B3KM21;Q5RI15	FAM36A;COX20	0.046682	0.925931
Protoporphyrinogen oxidase	P50336;B4DY76;B3KT30;Q96TC9;H0YFP3	PPOX	-0.0830599	0.926541
5-AMP-activated protein kinase subunit gamma-1	A0A024R125;P54619;F8VYY9;H0YHF8;H0YIC9	PRKAG1	-0.0820945	0.927088
Nucleoporin p54	Q53FD7;Q53H29;Q7Z3B4;B4DRV5	NUP54	-0.0624494	0.927088
28S ribosomal protein S18b, mitochondrial	B0S7P4;Q9Y676;B4DFG6;A0A0G2JIC6	MRPS18B	0.0454079	0.927088
Succinyl-CoA ligase subunit beta;Succinyl-CoA ligase [GDP-forming] subunit beta, mitochondrial	A0A024R325;Q96I99;Q3ZCW5;E9PDQ8	SUCLG2	0.0461762	0.927088
Transcription intermediary factor 1-beta	B2R8R5;Q13263	TRIM28	0.0488702	0.927088
NADH-ubiquinone oxidoreductase chain 4	A0A075X8B5;H9E785;A0A059QSR8;A0A141ZSL4;A0A141ZQA8;Q1ZY32;X5CDJ3;X5BLB3;V9N9T2;V9N9H0;V9N518;V9JFH6;V9J5G3;V9J548;V9J0Z6;V9IZQ9;V5JGF7;U5ZDA5;U5YXJ5;U5YT86;U3LDR4;U3LCU1;U3L9L1;U3L8Y8;U3L8P3;U3L6U8;U3L6N6;U3L6H7;T2HMQ7;T1Q5B1;T1Q517;S5RPJ8;S5RLC1;S4UQT8;R9Y4Q4;R9Y4D9;R9Y457;R9Y323;R9Y2B9;R9Y0J8;Q9T9Y1;Q9B2Y7;Q9B2Y5;Q9B2X8;Q9B2X6;Q9B2W5;Q9B2W2;Q9B1S7;Q9B188;Q9B0T8;Q8WCZ0;Q8WCY0;Q8W8T1;Q8HNR0;Q8HG2…	ND4;ndh4;NADH4;MT-ND4	0.0528249	0.927088
CDK5 regulatory subunit-associated protein 3	Q96JB5;J3QRM1	CDK5RAP3	0.0652378	0.927088
Cytoplasmic dynein 1 intermediate chain 2	A0A140VKE9;Q13409;B4DPZ3;Q59GU5;E7EQL5;E7EV09	DYNC1I2	0.075551	0.928923
Sorting nexin-3	O60493	SNX3	0.0963742	0.930233
[truncated: 165 more rows]
