# Supplementary material for: Proteomic mapping of atrial and ventricular heart tissue in patients with aortic valve stenosis
Source: Sci Rep. 2021 Dec 22;11:24389. doi: 10.1038/s41598-021-03907-3 (PMC8695579; doi:10.1038/s41598-021-03907-3)
Supplement: Supplementary file 6 — Supplementary Table 3. [file 41598_2021_3907_MOESM6_ESM.xlsx]

## Sheet: Legend
Supplementary Table 3 - Panther - Overrepresentation Test using proteins upregulated in the ventricle and respectively the atrium. Current Study. Dolls Study (Doll et al.: Supplementary Data 5. Differentially expressed proteins in the ventricular vs. atrial region).

## Sheet: Current Study
Analysis Type:	PANTHER Overrepresentation Test (Released 20200728)
Annotation Version and Release Date:	GO Ontology database DOI: 10.5281/zenodo.3980761 Released 2020-08-10
Analyzed List:	this study - ventricle
Reference List:	Homo sapiens (all genes in database)
Test Type:	FISHER
Correction:	FDR
GO cellular component complete	Homo sapiens - REFLIST (20851)	Client Text Box Input (53)	Client Text Box Input (expected)	Client Text Box Input (over/under)	Client Text Box Input (fold Enrichment)	Client Text Box Input (raw P-value)	Client Text Box Input (FDR)
cardiac Troponin complex (GO:1990584)	3	2	0.01	+	> 100	6.28e-05	0.00332	Ventricle	Barbarics
striated muscle myosin thick filament (GO:0005863)	3	2	0.01	+	> 100	6.28e-05	0.00323	Ventricle	Barbarics
cardiac myofibril (GO:0097512)	7	3	0.02	+	> 100	1.82e-06	0.000153	Ventricle	Barbarics
zonula adherens (GO:0005915)	9	2	0.02	+	87.43	0.000342	0.0156	Ventricle	Barbarics
troponin complex (GO:0005861)	9	2	0.02	+	87.43	0.000342	0.0153	Ventricle	Barbarics
myofilament (GO:0036379)	27	6	0.07	+	87.43	2.08e-10	3.8e-08	Ventricle	Barbarics
sarcoplasmic reticulum lumen (GO:0033018)	10	2	0.03	+	78.68	0.00041	0.0179	Ventricle	Barbarics
A band (GO:0031672)	39	7	0.1	+	70.61	2.21e-11	5.56e-09	Ventricle	Barbarics
striated muscle thin filament (GO:0005865)	23	4	0.06	+	68.42	6.19e-07	6.21e-05	Ventricle	Barbarics
costamere (GO:0043034)	19	3	0.05	+	62.12	2.29e-05	0.00144	Ventricle	Barbarics
M band (GO:0031430)	26	4	0.07	+	60.53	9.61e-07	9.19e-05	Ventricle	Barbarics
myosin filament (GO:0032982)	22	3	0.06	+	53.65	3.4e-05	0.00195	Ventricle	Barbarics
muscle myosin complex (GO:0005859)	15	2	0.04	+	52.46	0.000837	0.035	Ventricle	Barbarics
contractile fiber (GO:0043292)	242	19	0.62	+	30.89	2.86e-23	5.74e-20	Ventricle	Barbarics
myofibril (GO:0030016)	231	18	0.59	+	30.66	5.59e-22	5.61e-19	Ventricle	Barbarics
sarcomere (GO:0030017)	209	16	0.53	+	30.12	1.98e-19	1.32e-16	Ventricle	Barbarics
sarcoplasm (GO:0016528)	80	6	0.2	+	29.51	7.99e-08	1.23e-05	Ventricle	Barbarics
contractile actin filament bundle (GO:0097517)	72	5	0.18	+	27.32	1.49e-06	0.000136	Ventricle	Barbarics
stress fiber (GO:0001725)	72	5	0.18	+	27.32	1.49e-06	0.00013	Ventricle	Barbarics
I band (GO:0031674)	142	9	0.36	+	24.93	1.42e-10	2.86e-08	Ventricle	Barbarics
actin filament bundle (GO:0032432)	79	5	0.2	+	24.9	2.29e-06	0.000184	Ventricle	Barbarics
Z disc (GO:0030018)	129	8	0.33	+	24.4	1.92e-09	3.2e-07	Ventricle	Barbarics
actomyosin (GO:0042641)	83	5	0.21	+	23.7	2.88e-06	0.0002	Ventricle	Barbarics
respiratory chain complex I (GO:0045271)	50	3	0.13	+	23.6	0.00033	0.0161	Ventricle	Barbarics
NADH dehydrogenase complex (GO:0030964)	50	3	0.13	+	23.6	0.00033	0.0158	Ventricle	Barbarics
mitochondrial respiratory chain complex I (GO:0005747)	50	3	0.13	+	23.6	0.00033	0.0154	Ventricle	Barbarics
myosin complex (GO:0016459)	58	3	0.15	+	20.35	0.000499	0.0213	Ventricle	Barbarics
sarcoplasmic reticulum (GO:0016529)	71	3	0.18	+	16.62	0.000879	0.036	Ventricle	Barbarics
sarcolemma (GO:0042383)	136	5	0.35	+	14.46	2.88e-05	0.00175	Ventricle	Barbarics
oxidoreductase complex (GO:1990204)	110	4	0.28	+	14.31	0.0002	0.01	Ventricle	Barbarics
actin cytoskeleton (GO:0015629)	515	15	1.31	+	11.46	2.43e-12	6.98e-10	Ventricle	Barbarics
focal adhesion (GO:0005925)	417	10	1.06	+	9.43	1.01e-07	1.36e-05	Ventricle	Barbarics
cell-substrate junction (GO:0030055)	425	10	1.08	+	9.26	1.2e-07	1.51e-05	Ventricle	Barbarics
supramolecular fiber (GO:0099512)	1012	22	2.57	+	8.55	1.61e-15	8.11e-13	Ventricle	Barbarics
supramolecular polymer (GO:0099081)	1020	22	2.59	+	8.49	1.89e-15	7.61e-13	Ventricle	Barbarics
mitochondrial matrix (GO:0005759)	480	8	1.22	+	6.56	2.93e-05	0.00173	Ventricle	Barbarics
supramolecular complex (GO:0099080)	1338	22	3.4	+	6.47	4.35e-13	1.45e-10	Ventricle	Barbarics
anchoring junction (GO:0070161)	837	10	2.13	+	4.7	4.53e-05	0.00253	Ventricle	Barbarics
cytoskeleton (GO:0005856)	2307	21	5.86	+	3.58	8.06e-08	1.16e-05	Ventricle	Barbarics
extracellular exosome (GO:0070062)	2098	18	5.33	+	3.38	2.32e-06	0.000179	Ventricle	Barbarics
mitochondrion (GO:0005739)	1648	14	4.19	+	3.34	4.77e-05	0.00259	Ventricle	Barbarics
extracellular vesicle (GO:1903561)	2119	18	5.39	+	3.34	2.67e-06	0.000199	Ventricle	Barbarics
extracellular organelle (GO:0043230)	2121	18	5.39	+	3.34	2.71e-06	0.000194	Ventricle	Barbarics
intracellular non-membrane-bounded organelle (GO:0043232)	5274	29	13.41	+	2.16	8.3e-06	0.000555	Ventricle	Barbarics
non-membrane-bounded organelle (GO:0043228)	5283	29	13.43	+	2.16	8.38e-06	0.000543	Ventricle	Barbarics
cytoplasm (GO:0005737)	11717	51	29.78	+	1.71	5.95e-11	1.33e-08	Ventricle	Barbarics
intracellular organelle (GO:0043229)	12856	49	32.68	+	1.5	5.65e-07	5.97e-05	Ventricle	Barbarics
organelle (GO:0043226)	13868	51	35.25	+	1.45	2.24e-07	2.65e-05	Ventricle	Barbarics
intracellular (GO:0005622)	14704	52	37.38	+	1.39	3.84e-07	4.28e-05	Ventricle	Barbarics
Analysis Type:	PANTHER Overrepresentation Test (Released 20200728)
Annotation Version and Release Date:	GO Ontology database DOI: 10.5281/zenodo.3980761 Released 2020-08-10
Analyzed List:	This study - Atrium
Reference List:	Homo sapiens (all genes in database)
Test Type:	FISHER
Correction:	FDR
GO cellular component complete	Homo sapiens - REFLIST (20851)	Client Text Box Input (240)	Client Text Box Input (expected)	Client Text Box Input (over/under)	Client Text Box Input (fold Enrichment)	Client Text Box Input (raw P-value)	Client Text Box Input (FDR)
collagen type I trimer (GO:0005584)	2	2	0.02	+	86.88	0.000762	0.0135	Atrium	Barbarics
serine-type peptidase complex (GO:1905286)	3	2	0.03	+	57.92	0.00126	0.0215	Atrium	Barbarics
integrin alpha4-beta1 complex (GO:0034668)	3	2	0.03	+	57.92	0.00126	0.0213	Atrium	Barbarics
eukaryotic translation elongation factor 1 complex (GO:0005853)	4	2	0.05	+	43.44	0.00188	0.0301	Atrium	Barbarics
fibrinogen complex (GO:0005577)	8	3	0.09	+	32.58	0.000224	0.00469	Atrium	Barbarics
zona pellucida receptor complex (GO:0002199)	8	3	0.09	+	32.58	0.000224	0.00465	Atrium	Barbarics
chaperonin-containing T-complex (GO:0005832)	11	4	0.13	+	31.59	2.02e-05	0.000549	Atrium	Barbarics
dense body (GO:0097433)	6	2	0.07	+	28.96	0.00345	0.0491	Atrium	Barbarics
paraspeckles (GO:0042382)	6	2	0.07	+	28.96	0.00345	0.0488	Atrium	Barbarics
haptoglobin-hemoglobin complex (GO:0031838)	10	3	0.12	+	26.06	0.000383	0.00732	Atrium	Barbarics
endoplasmic reticulum chaperone complex (GO:0034663)	10	3	0.12	+	26.06	0.000383	0.00725	Atrium	Barbarics
endocytic vesicle lumen (GO:0071682)	21	6	0.24	+	24.82	4.94e-07	1.71e-05	Atrium	Barbarics
polysomal ribosome (GO:0042788)	34	6	0.39	+	15.33	5.66e-06	0.00017	Atrium	Barbarics
chaperone complex (GO:0101031)	25	4	0.29	+	13.9	0.000311	0.00617	Atrium	Barbarics
endolysosome (GO:0036019)	20	3	0.23	+	13.03	0.00218	0.0334	Atrium	Barbarics
mast cell granule (GO:0042629)	22	3	0.25	+	11.85	0.00278	0.042	Atrium	Barbarics
proteasome regulatory particle (GO:0005838)	22	3	0.25	+	11.85	0.00278	0.0417	Atrium	Barbarics
cytosolic large ribosomal subunit (GO:0022625)	59	8	0.68	+	11.78	9.15e-07	3.06e-05	Atrium	Barbarics
cytosolic small ribosomal subunit (GO:0022627)	48	6	0.55	+	10.86	3.34e-05	0.000859	Atrium	Barbarics
blood microparticle (GO:0072562)	144	18	1.66	+	10.86	4.37e-13	2.83e-11	Atrium	Barbarics
cytosolic ribosome (GO:0022626)	112	14	1.29	+	10.86	1.86e-10	1.04e-08	Atrium	Barbarics
platelet alpha granule lumen (GO:0031093)	67	8	0.77	+	10.37	2.19e-06	6.87e-05	Atrium	Barbarics
melanosome (GO:0042470)	105	12	1.21	+	9.93	9.56e-09	4.18e-07	Atrium	Barbarics
pigment granule (GO:0048770)	105	12	1.21	+	9.93	9.56e-09	4.09e-07	Atrium	Barbarics
ficolin-1-rich granule (GO:0101002)	124	14	1.43	+	9.81	6.31e-10	3.17e-08	Atrium	Barbarics
ficolin-1-rich granule lumen (GO:1904813)	124	14	1.43	+	9.81	6.31e-10	3.09e-08	Atrium	Barbarics
polysome (GO:0005844)	72	8	0.83	+	9.65	3.58e-06	0.000111	Atrium	Barbarics
endopeptidase complex (GO:1905369)	71	7	0.82	+	8.57	3.01e-05	0.000785	Atrium	Barbarics
intercalated disc (GO:0014704)	53	5	0.61	+	8.2	0.000513	0.00954	Atrium	Barbarics
proteasome complex (GO:0000502)	65	6	0.75	+	8.02	0.000157	0.0034	Atrium	Barbarics
small ribosomal subunit (GO:0015935)	76	7	0.87	+	8	4.51e-05	0.00108	Atrium	Barbarics
nucleosome (GO:0000786)	77	7	0.89	+	7.9	4.87e-05	0.00115	Atrium	Barbarics
rough endoplasmic reticulum (GO:0005791)	88	8	1.01	+	7.9	1.4e-05	0.000396	Atrium	Barbarics
cell-substrate junction (GO:0030055)	425	38	4.89	+	7.77	8.91e-22	1.38e-19	Atrium	Barbarics
focal adhesion (GO:0005925)	417	37	4.8	+	7.71	4.11e-21	5.89e-19	Atrium	Barbarics
platelet alpha granule (GO:0031091)	91	8	1.05	+	7.64	1.76e-05	0.000483	Atrium	Barbarics
secretory granule lumen (GO:0034774)	321	28	3.69	+	7.58	5.37e-16	5.14e-14	Atrium	Barbarics
myosin complex (GO:0016459)	58	5	0.67	+	7.49	0.000752	0.0135	Atrium	Barbarics
cytoplasmic vesicle lumen (GO:0060205)	325	28	3.74	+	7.48	7.2e-16	6.57e-14	Atrium	Barbarics
vesicle lumen (GO:0031983)	327	28	3.76	+	7.44	8.32e-16	7.26e-14	Atrium	Barbarics
collagen-containing extracellular matrix (GO:0062023)	427	36	4.91	+	7.32	7e-20	9.37e-18	Atrium	Barbarics
peptidase complex (GO:1905368)	96	8	1.1	+	7.24	2.52e-05	0.000665	Atrium	Barbarics
contractile actin filament bundle (GO:0097517)	72	6	0.83	+	7.24	0.000264	0.00536	Atrium	Barbarics
stress fiber (GO:0001725)	72	6	0.83	+	7.24	0.000264	0.00531	Atrium	Barbarics
DNA packaging complex (GO:0044815)	85	7	0.98	+	7.15	8.72e-05	0.00197	Atrium	Barbarics
cell-cell contact zone (GO:0044291)	76	6	0.87	+	6.86	0.000347	0.00677	Atrium	Barbarics
ribosomal subunit (GO:0044391)	191	15	2.2	+	6.82	1.51e-08	6.08e-07	Atrium	Barbarics
actin filament bundle (GO:0032432)	79	6	0.91	+	6.6	0.000421	0.00791	Atrium	Barbarics
actomyosin (GO:0042641)	83	6	0.96	+	6.28	0.000539	0.00993	Atrium	Barbarics
ribosome (GO:0005840)	242	17	2.79	+	6.1	7.76e-09	3.46e-07	Atrium	Barbarics
large ribosomal subunit (GO:0015934)	118	8	1.36	+	5.89	9.91e-05	0.00219	Atrium	Barbarics
endoplasmic reticulum lumen (GO:0005788)	313	21	3.6	+	5.83	2.77e-10	1.5e-08	Atrium	Barbarics
azurophil granule lumen (GO:0035578)	90	6	1.04	+	5.79	0.000805	0.0142	Atrium	Barbarics
lamellipodium (GO:0030027)	203	13	2.34	+	5.56	1.25e-06	4.11e-05	Atrium	Barbarics
vacuolar lumen (GO:0005775)	172	11	1.98	+	5.56	8.41e-06	0.000241	Atrium	Barbarics
extracellular matrix (GO:0031012)	569	36	6.55	+	5.5	3.78e-16	3.99e-14	Atrium	Barbarics
sarcomere (GO:0030017)	209	13	2.41	+	5.4	1.69e-06	5.4e-05	Atrium	Barbarics
Z disc (GO:0030018)	129	8	1.48	+	5.39	0.000177	0.00375	Atrium	Barbarics
myofibril (GO:0030016)	231	14	2.66	+	5.27	9.01e-07	3.07e-05	Atrium	Barbarics
sarcolemma (GO:0042383)	136	8	1.57	+	5.11	0.000249	0.00511	Atrium	Barbarics
extracellular exosome (GO:0070062)	2098	123	24.15	+	5.09	1.06e-56	7.06e-54	Atrium	Barbarics
extracellular vesicle (GO:1903561)	2119	124	24.39	+	5.08	3.42e-57	6.86e-54	Atrium	Barbarics
extracellular organelle (GO:0043230)	2121	124	24.41	+	5.08	3.78e-57	3.8e-54	Atrium	Barbarics
contractile fiber (GO:0043292)	242	14	2.79	+	5.03	1.52e-06	4.91e-05	Atrium	Barbarics
basement membrane (GO:0005604)	104	6	1.2	+	5.01	0.00163	0.0271	Atrium	Barbarics
anchoring junction (GO:0070161)	837	48	9.63	+	4.98	9.96e-20	1.25e-17	Atrium	Barbarics
I band (GO:0031674)	142	8	1.63	+	4.89	0.000329	0.00647	Atrium	Barbarics
tertiary granule (GO:0070820)	164	9	1.89	+	4.77	0.000169	0.00362	Atrium	Barbarics
nuclear chromosome, telomeric region (GO:0000784)	110	6	1.27	+	4.74	0.00214	0.033	Atrium	Barbarics
actin cytoskeleton (GO:0015629)	515	27	5.93	+	4.55	1.41e-10	8.06e-09	Atrium	Barbarics
secretory granule (GO:0030141)	861	45	9.91	+	4.54	4.73e-17	5.28e-15	Atrium	Barbarics
azurophil granule (GO:0042582)	154	8	1.77	+	4.51	0.000549	0.01	Atrium	Barbarics
primary lysosome (GO:0005766)	154	8	1.77	+	4.51	0.000549	0.00994	Atrium	Barbarics
cell cortex (GO:0005938)	314	15	3.61	+	4.15	6.01e-06	0.000178	Atrium	Barbarics
microbody (GO:0042579)	148	7	1.7	+	4.11	0.00203	0.032	Atrium	Barbarics
peroxisome (GO:0005777)	148	7	1.7	+	4.11	0.00203	0.0318	Atrium	Barbarics
secretory vesicle (GO:0099503)	1027	47	11.82	+	3.98	1.13e-15	9.42e-14	Atrium	Barbarics
protein-DNA complex (GO:0032993)	175	8	2.01	+	3.97	0.00121	0.0208	Atrium	Barbarics
growth cone (GO:0030426)	188	8	2.16	+	3.7	0.00187	0.0303	Atrium	Barbarics
cell leading edge (GO:0031252)	427	18	4.91	+	3.66	3.78e-06	0.000115	Atrium	Barbarics
endocytic vesicle (GO:0030139)	341	14	3.92	+	3.57	6.06e-05	0.0014	Atrium	Barbarics
site of polarized growth (GO:0030427)	195	8	2.24	+	3.56	0.00233	0.0355	Atrium	Barbarics
extracellular space (GO:0005615)	3389	133	39.01	+	3.41	8.03e-43	4.03e-40	Atrium	Barbarics
ribonucleoprotein complex (GO:1990904)	700	27	8.06	+	3.35	7.3e-08	2.87e-06	Atrium	Barbarics
cell-cell junction (GO:0005911)	497	19	5.72	+	3.32	7.8e-06	0.000227	Atrium	Barbarics
mitochondrial matrix (GO:0005759)	480	18	5.52	+	3.26	1.74e-05	0.000486	Atrium	Barbarics
perinuclear region of cytoplasm (GO:0048471)	734	27	8.45	+	3.2	1.82e-07	6.43e-06	Atrium	Barbarics
vesicle (GO:0031982)	3923	142	45.15	+	3.14	1.05e-42	4.21e-40	Atrium	Barbarics
supramolecular fiber (GO:0099512)	1012	35	11.65	+	3	1.04e-08	4.36e-07	Atrium	Barbarics
supramolecular polymer (GO:0099081)	1020	35	11.74	+	2.98	1.26e-08	5.17e-07	Atrium	Barbarics
cell body (GO:0044297)	606	20	6.98	+	2.87	3.48e-05	0.000872	Atrium	Barbarics
cell junction (GO:0030054)	2122	70	24.42	+	2.87	4.51e-16	4.53e-14	Atrium	Barbarics
synapse (GO:0045202)	1383	45	15.92	+	2.83	3.82e-10	2.02e-08	Atrium	Barbarics
extracellular region (GO:0005576)	4395	142	50.59	+	2.81	5.27e-37	1.76e-34	Atrium	Barbarics
glutamatergic synapse (GO:0098978)	373	12	4.29	+	2.8	0.00161	0.0269	Atrium	Barbarics
lytic vacuole (GO:0000323)	716	22	8.24	+	2.67	3.99e-05	0.000988	Atrium	Barbarics
lysosome (GO:0005764)	716	22	8.24	+	2.67	3.99e-05	0.000976	Atrium	Barbarics
postsynapse (GO:0098794)	651	20	7.49	+	2.67	9.04e-05	0.00202	Atrium	Barbarics
endoplasmic reticulum (GO:0005783)	1472	45	16.94	+	2.66	2.56e-09	1.22e-07	Atrium	Barbarics
cytoplasmic vesicle (GO:0031410)	2434	73	28.02	+	2.61	1.11e-14	7.66e-13	Atrium	Barbarics
intracellular vesicle (GO:0097708)	2438	73	28.06	+	2.6	1.2e-14	8.04e-13	Atrium	Barbarics
vacuole (GO:0005773)	815	24	9.38	+	2.56	3.4e-05	0.000865	Atrium	Barbarics
supramolecular complex (GO:0099080)	1338	39	15.4	+	2.53	1.19e-07	4.36e-06	Atrium	Barbarics
nucleolus (GO:0005730)	942	26	10.84	+	2.4	5.76e-05	0.00134	Atrium	Barbarics
side of membrane (GO:0098552)	655	18	7.54	+	2.39	0.00113	0.0198	Atrium	Barbarics
mitochondrion (GO:0005739)	1648	45	18.97	+	2.37	1.07e-07	4.05e-06	Atrium	Barbarics
cell surface (GO:0009986)	947	25	10.9	+	2.29	0.000139	0.00303	Atrium	Barbarics
cytosol (GO:0005829)	5314	138	61.17	+	2.26	2.79e-25	5.61e-23	Atrium	Barbarics
dendrite (GO:0030425)	621	16	7.15	+	2.24	0.00331	0.0485	Atrium	Barbarics
dendritic tree (GO:0097447)	623	16	7.17	+	2.23	0.00338	0.0491	Atrium	Barbarics
vesicle membrane (GO:0012506)	810	20	9.32	+	2.15	0.00203	0.0316	Atrium	Barbarics
neuron projection (GO:0043005)	1395	34	16.06	+	2.12	4.32e-05	0.00104	Atrium	Barbarics
polymeric cytoskeletal fiber (GO:0099513)	781	19	8.99	+	2.11	0.00303	0.045	Atrium	Barbarics
cytoskeleton (GO:0005856)	2307	56	26.55	+	2.11	7.93e-08	3.06e-06	Atrium	Barbarics
cytoplasmic vesicle membrane (GO:0030659)	788	19	9.07	+	2.09	0.00317	0.0468	Atrium	Barbarics
somatodendritic compartment (GO:0036477)	872	21	10.04	+	2.09	0.00173	0.0283	Atrium	Barbarics
protein-containing complex (GO:0032991)	5532	128	63.67	+	2.01	3.04e-18	3.59e-16	Atrium	Barbarics
endomembrane system (GO:0012505)	4631	104	53.3	+	1.95	4.54e-13	2.85e-11	Atrium	Barbarics
whole membrane (GO:0098805)	1739	37	20.02	+	1.85	0.000373	0.0072	Atrium	Barbarics
cell projection (GO:0042995)	2352	50	27.07	+	1.85	2.17e-05	0.000582	Atrium	Barbarics
envelope (GO:0031975)	1229	26	14.15	+	1.84	0.00344	0.0497	Atrium	Barbarics
organelle envelope (GO:0031967)	1229	26	14.15	+	1.84	0.00344	0.0494	Atrium	Barbarics
organelle lumen (GO:0043233)	6114	129	70.37	+	1.83	6.12e-15	4.73e-13	Atrium	Barbarics
intracellular organelle lumen (GO:0070013)	6114	129	70.37	+	1.83	6.12e-15	4.55e-13	Atrium	Barbarics
membrane-enclosed lumen (GO:0031974)	6114	129	70.37	+	1.83	6.12e-15	4.39e-13	Atrium	Barbarics
plasma membrane bounded cell projection (GO:0120025)	2255	47	25.96	+	1.81	6.39e-05	0.00146	Atrium	Barbarics
intracellular non-membrane-bounded organelle (GO:0043232)	5274	107	60.71	+	1.76	1.24e-10	7.55e-09	Atrium	Barbarics
non-membrane-bounded organelle (GO:0043228)	5283	107	60.81	+	1.76	1.32e-10	7.8e-09	Atrium	Barbarics
cytoplasm (GO:0005737)	11717	218	134.87	+	1.62	9.59e-32	2.75e-29	Atrium	Barbarics
membrane-bounded organelle (GO:0043227)	12748	220	146.73	+	1.5	1.58e-26	3.53e-24	Atrium	Barbarics
intracellular organelle (GO:0043229)	12856	218	147.98	+	1.47	3.18e-24	5.8e-22	Atrium	Barbarics
intracellular membrane-bounded organelle (GO:0043231)	11041	187	127.08	+	1.47	2.53e-15	2.03e-13	Atrium	Barbarics
nucleus (GO:0005634)	7578	128	87.22	+	1.47	1.12e-07	4.16e-06	Atrium	Barbarics
organelle (GO:0043226)	13868	230	159.62	+	1.44	1.35e-28	3.38e-26	Atrium	Barbarics
membrane (GO:0016020)	9917	155	114.15	+	1.36	1.58e-07	5.67e-06	Atrium	Barbarics
intracellular (GO:0005622)	14704	229	169.25	+	1.35	2.19e-22	3.67e-20	Atrium	Barbarics
cell periphery (GO:0071944)	5934	92	68.3	+	1.35	0.00117	0.0202	Atrium	Barbarics
cellular anatomical entity (GO:0110165)	18767	239	216.01	+	1.11	5.96e-10	3.07e-08	Atrium	Barbarics
cellular_component (GO:0005575)	18951	239	218.13	+	1.1	5.04e-09	2.36e-07	Atrium	Barbarics
intrinsic component of membrane (GO:0031224)	5937	47	68.34	-	0.69	0.00192	0.0307	Atrium	Barbarics
integral component of membrane (GO:0016021)	5780	45	66.53	-	0.68	0.00173	0.0285	Atrium	Barbarics
Unclassified (UNCLASSIFIED)	1900	1	21.87	-	0.05	5.04e-09	2.3e-07	Atrium	Barbarics

## Sheet: Doll et al
Analysis Type:	PANTHER Overrepresentation Test (Released 20200728)
Annotation Version and Release Date:	GO Ontology database DOI: 10.5281/zenodo.3980761 Released 2020-08-10
Analyzed List:	Doll et al - Ventricle
Reference List:	Homo sapiens (all genes in database)
Test Type:	FISHER
Correction:	FDR
GO cellular component complete	Homo sapiens - REFLIST (20851)	Client Text Box Input (730)	Client Text Box Input (expected)	Client Text Box Input (over/under)	Client Text Box Input (fold Enrichment)	Client Text Box Input (raw P-value)	Client Text Box Input (FDR)
cardiac Troponin complex (GO:1990584)	3	3	0.11	+	28.56	0.000714	0.0114	Ventricle	Doll
mitochondrial alpha-ketoglutarate dehydrogenase complex (GO:0005947)	5	5	0.18	+	28.56	9.56e-06	0.0002	Ventricle	Doll
cardiac myofibril (GO:0097512)	7	6	0.25	+	24.48	2.06e-06	4.64e-05	Ventricle	Doll
mitochondrial tricarboxylic acid cycle enzyme complex (GO:0030062)	6	5	0.21	+	23.8	1.7e-05	0.000345	Ventricle	Doll
dihydrolipoyl dehydrogenase complex (GO:0045240)	10	8	0.35	+	22.85	5.35e-08	1.47e-06	Ventricle	Doll
pyruvate dehydrogenase complex (GO:0045254)	8	6	0.28	+	21.42	3.49e-06	7.62e-05	Ventricle	Doll
tricarboxylic acid cycle enzyme complex (GO:0045239)	15	11	0.53	+	20.95	2.99e-10	1.09e-08	Ventricle	Doll
fascia adherens (GO:0005916)	10	7	0.35	+	19.99	7.12e-07	1.66e-05	Ventricle	Doll
mitochondrial pyruvate dehydrogenase complex (GO:0005967)	6	4	0.21	+	19.04	0.000232	0.00394	Ventricle	Doll
oxoglutarate dehydrogenase complex (GO:0045252)	6	4	0.21	+	19.04	0.000232	0.00391	Ventricle	Doll
respiratory chain complex I (GO:0045271)	50	32	1.75	+	18.28	5.34e-26	4.46e-24	Ventricle	Doll
NADH dehydrogenase complex (GO:0030964)	50	32	1.75	+	18.28	5.34e-26	4.29e-24	Ventricle	Doll
mitochondrial respiratory chain complex I (GO:0005747)	50	32	1.75	+	18.28	5.34e-26	4.12e-24	Ventricle	Doll
basal cortex (GO:0045180)	5	3	0.18	+	17.14	0.0019	0.0277	Ventricle	Doll
mitochondrial proton-transporting ATP synthase complex, coupling factor F(o) (GO:0000276)	13	7	0.46	+	15.38	2.6e-06	5.73e-05	Ventricle	Doll
respiratory chain complex (GO:0098803)	84	45	2.94	+	15.3	1.51e-33	1.89e-31	Ventricle	Doll
proton-transporting ATP synthase complex, coupling factor F(o) (GO:0045263)	15	8	0.53	+	15.23	5.15e-07	1.25e-05	Ventricle	Doll
oxidoreductase complex (GO:1990204)	110	55	3.85	+	14.28	1.46e-39	1.96e-37	Ventricle	Doll
mitochondrial respirasome (GO:0005746)	89	44	3.12	+	14.12	1.09e-31	1.15e-29	Ventricle	Doll
respirasome (GO:0070469)	100	47	3.5	+	13.42	5.27e-33	6.22e-31	Ventricle	Doll
myofilament (GO:0036379)	27	12	0.95	+	12.69	3.47e-09	1.16e-07	Ventricle	Doll
zonula adherens (GO:0005915)	9	4	0.32	+	12.69	0.000727	0.0115	Ventricle	Doll
striated muscle thin filament (GO:0005865)	23	10	0.81	+	12.42	8.43e-08	2.23e-06	Ventricle	Doll
respiratory chain complex III (GO:0045275)	14	6	0.49	+	12.24	3.79e-05	0.000732	Ventricle	Doll
mitochondrial respiratory chain complex III (GO:0005750)	14	6	0.49	+	12.24	3.79e-05	0.000725	Ventricle	Doll
inner mitochondrial membrane protein complex (GO:0098800)	144	61	5.04	+	12.1	1.73e-40	2.67e-38	Ventricle	Doll
M band (GO:0031430)	26	11	0.91	+	12.08	2.36e-08	6.86e-07	Ventricle	Doll
muscle myosin complex (GO:0005859)	15	6	0.53	+	11.43	5.15e-05	0.000958	Ventricle	Doll
A band (GO:0031672)	39	15	1.37	+	10.99	1.91e-10	7.11e-09	Ventricle	Doll
mitochondrial protein complex (GO:0098798)	269	101	9.42	+	10.72	6.43e-63	1.29e-60	Ventricle	Doll
respiratory chain complex IV (GO:0045277)	19	7	0.67	+	10.52	1.85e-05	0.000371	Ventricle	Doll
cytochrome complex (GO:0070069)	33	12	1.16	+	10.39	2.12e-08	6.25e-07	Ventricle	Doll
TIM23 mitochondrial import inner membrane translocase complex (GO:0005744)	14	5	0.49	+	10.2	0.000342	0.00568	Ventricle	Doll
organellar large ribosomal subunit (GO:0000315)	58	20	2.03	+	9.85	9.33e-13	4.26e-11	Ventricle	Doll
mitochondrial large ribosomal subunit (GO:0005762)	58	20	2.03	+	9.85	9.33e-13	4.16e-11	Ventricle	Doll
mitochondrial nucleoid (GO:0042645)	44	15	1.54	+	9.74	7.53e-10	2.7e-08	Ventricle	Doll
nucleoid (GO:0009295)	44	15	1.54	+	9.74	7.53e-10	2.65e-08	Ventricle	Doll
myosin II complex (GO:0016460)	21	7	0.74	+	9.52	3.13e-05	0.000611	Ventricle	Doll
proton-transporting ATP synthase complex (GO:0045259)	24	8	0.84	+	9.52	8.44e-06	0.000178	Ventricle	Doll
mitochondrial respiratory chain complex IV (GO:0005751)	12	4	0.42	+	9.52	0.00171	0.025	Ventricle	Doll
organellar ribosome (GO:0000313)	89	29	3.12	+	9.31	2.42e-17	1.73e-15	Ventricle	Doll
mitochondrial ribosome (GO:0005761)	89	29	3.12	+	9.31	2.42e-17	1.67e-15	Ventricle	Doll
proton-transporting two-sector ATPase complex, proton-transporting domain (GO:0033177)	25	8	0.88	+	9.14	1.08e-05	0.000224	Ventricle	Doll
myosin filament (GO:0032982)	22	7	0.77	+	9.09	4.01e-05	0.000759	Ventricle	Doll
mitochondrial matrix (GO:0005759)	480	148	16.8	+	8.81	2.12e-83	8.51e-81	Ventricle	Doll
MIB complex (GO:0140275)	13	4	0.46	+	8.79	0.00217	0.0314	Ventricle	Doll
SAM complex (GO:0001401)	13	4	0.46	+	8.79	0.00217	0.0312	Ventricle	Doll
mitochondrial proton-transporting ATP synthase complex (GO:0005753)	23	7	0.81	+	8.69	5.08e-05	0.000953	Ventricle	Doll
mitochondrial inner membrane (GO:0005743)	497	150	17.4	+	8.62	1.7e-83	8.53e-81	Ventricle	Doll
extrinsic component of mitochondrial inner membrane (GO:0031314)	14	4	0.49	+	8.16	0.00272	0.0374	Ventricle	Doll
organelle inner membrane (GO:0019866)	559	151	19.57	+	7.72	2.12e-78	6.1e-76	Ventricle	Doll
intercalated disc (GO:0014704)	53	14	1.86	+	7.54	4.22e-08	1.19e-06	Ventricle	Doll
sarcomere (GO:0030017)	209	52	7.32	+	7.11	1.87e-25	1.39e-23	Ventricle	Doll
myofibril (GO:0030016)	231	57	8.09	+	7.05	1.19e-27	1.14e-25	Ventricle	Doll
contractile fiber (GO:0043292)	242	58	8.47	+	6.85	1.47e-27	1.34e-25	Ventricle	Doll
integral component of mitochondrial inner membrane (GO:0031305)	55	13	1.93	+	6.75	3.85e-07	9.66e-06	Ventricle	Doll
intrinsic component of mitochondrial inner membrane (GO:0031304)	55	13	1.93	+	6.75	3.85e-07	9.54e-06	Ventricle	Doll
mitochondrial membrane (GO:0031966)	733	173	25.66	+	6.74	1.29e-82	4.32e-80	Ventricle	Doll
Z disc (GO:0030018)	129	30	4.52	+	6.64	1.52e-14	7.64e-13	Ventricle	Doll
I band (GO:0031674)	142	33	4.97	+	6.64	7.4e-16	4.37e-14	Ventricle	Doll
mitochondrial intermembrane space (GO:0005758)	82	19	2.87	+	6.62	1.09e-09	3.77e-08	Ventricle	Doll
mitochondrial envelope (GO:0005740)	778	180	27.24	+	6.61	5.42e-85	5.44e-82	Ventricle	Doll
microbody lumen (GO:0031907)	58	13	2.03	+	6.4	6.5e-07	1.55e-05	Ventricle	Doll
peroxisomal matrix (GO:0005782)	58	13	2.03	+	6.4	6.5e-07	1.53e-05	Ventricle	Doll
organellar small ribosomal subunit (GO:0000314)	28	6	0.98	+	6.12	0.000878	0.0137	Ventricle	Doll
mitochondrial small ribosomal subunit (GO:0005763)	28	6	0.98	+	6.12	0.000878	0.0136	Ventricle	Doll
integral component of mitochondrial membrane (GO:0032592)	86	18	3.01	+	5.98	1.19e-08	3.68e-07	Ventricle	Doll
intrinsic component of mitochondrial membrane (GO:0098573)	87	18	3.05	+	5.91	1.39e-08	4.17e-07	Ventricle	Doll
organelle envelope lumen (GO:0031970)	92	19	3.22	+	5.9	5.68e-09	1.87e-07	Ventricle	Doll
cell-cell contact zone (GO:0044291)	76	15	2.66	+	5.64	3.79e-07	9.63e-06	Ventricle	Doll
catenin complex (GO:0016342)	32	6	1.12	+	5.36	0.00161	0.0239	Ventricle	Doll
mitochondrion (GO:0005739)	1648	308	57.7	+	5.34	1.5e-132	3.01e-129	Ventricle	Doll
large ribosomal subunit (GO:0015934)	118	22	4.13	+	5.33	1.92e-09	6.54e-08	Ventricle	Doll
myosin complex (GO:0016459)	58	10	2.03	+	4.92	9.11e-05	0.0016	Ventricle	Doll
proton-transporting two-sector ATPase complex (GO:0016469)	53	9	1.86	+	4.85	0.000225	0.00386	Ventricle	Doll
contractile actin filament bundle (GO:0097517)	72	12	2.52	+	4.76	2.49e-05	0.000495	Ventricle	Doll
stress fiber (GO:0001725)	72	12	2.52	+	4.76	2.49e-05	0.00049	Ventricle	Doll
actin filament bundle (GO:0032432)	79	13	2.77	+	4.7	1.3e-05	0.000266	Ventricle	Doll
cell cortex region (GO:0099738)	43	7	1.51	+	4.65	0.00139	0.0208	Ventricle	Doll
ribosomal subunit (GO:0044391)	191	30	6.69	+	4.49	9.67e-11	3.74e-09	Ventricle	Doll
envelope (GO:0031975)	1229	193	43.03	+	4.49	1.65e-66	4.13e-64	Ventricle	Doll
organelle envelope (GO:0031967)	1229	193	43.03	+	4.49	1.65e-66	3.67e-64	Ventricle	Doll
microbody (GO:0042579)	148	22	5.18	+	4.25	7.32e-08	1.99e-06	Ventricle	Doll
peroxisome (GO:0005777)	148	22	5.18	+	4.25	7.32e-08	1.96e-06	Ventricle	Doll
cortical actin cytoskeleton (GO:0030864)	81	12	2.84	+	4.23	6.95e-05	0.00127	Ventricle	Doll
cortical cytoskeleton (GO:0030863)	110	16	3.85	+	4.15	5.58e-06	0.000119	Ventricle	Doll
actomyosin (GO:0042641)	83	12	2.91	+	4.13	8.58e-05	0.00152	Ventricle	Doll
ribosome (GO:0005840)	242	34	8.47	+	4.01	8.13e-11	3.2e-09	Ventricle	Doll
mitochondrial outer membrane (GO:0005741)	198	27	6.93	+	3.89	1.27e-08	3.87e-07	Ventricle	Doll
adherens junction (GO:0005912)	167	22	5.85	+	3.76	4.78e-07	1.17e-05	Ventricle	Doll
specific granule lumen (GO:0035580)	62	8	2.17	+	3.69	0.00245	0.0342	Ventricle	Doll
sarcoplasm (GO:0016528)	80	10	2.8	+	3.57	0.000921	0.0141	Ventricle	Doll
organelle outer membrane (GO:0031968)	224	28	7.84	+	3.57	3.71e-08	1.06e-06	Ventricle	Doll
outer membrane (GO:0019867)	226	28	7.91	+	3.54	4.4e-08	1.23e-06	Ventricle	Doll
microbody membrane (GO:0031903)	65	8	2.28	+	3.52	0.0032	0.0428	Ventricle	Doll
peroxisomal membrane (GO:0005778)	65	8	2.28	+	3.52	0.0032	0.0425	Ventricle	Doll
actin filament (GO:0005884)	123	15	4.31	+	3.48	6.94e-05	0.00128	Ventricle	Doll
actin cytoskeleton (GO:0015629)	515	57	18.03	+	3.16	3.1e-13	1.45e-11	Ventricle	Doll
sarcolemma (GO:0042383)	136	14	4.76	+	2.94	0.000585	0.00947	Ventricle	Doll
ficolin-1-rich granule (GO:0101002)	124	12	4.34	+	2.76	0.00227	0.0324	Ventricle	Doll
ficolin-1-rich granule lumen (GO:1904813)	124	12	4.34	+	2.76	0.00227	0.0321	Ventricle	Doll
lamellipodium (GO:0030027)	203	19	7.11	+	2.67	0.000208	0.0036	Ventricle	Doll
focal adhesion (GO:0005925)	417	37	14.6	+	2.53	9.86e-07	2.28e-05	Ventricle	Doll
specific granule (GO:0042581)	160	14	5.6	+	2.5	0.00244	0.0343	Ventricle	Doll
cell-substrate junction (GO:0030055)	425	37	14.88	+	2.49	1.39e-06	3.17e-05	Ventricle	Doll
tertiary granule (GO:0070820)	164	14	5.74	+	2.44	0.003	0.0405	Ventricle	Doll
supramolecular fiber (GO:0099512)	1012	83	35.43	+	2.34	6.23e-12	2.72e-10	Ventricle	Doll
actin-based cell projection (GO:0098858)	221	18	7.74	+	2.33	0.00161	0.0238	Ventricle	Doll
supramolecular polymer (GO:0099081)	1020	83	35.71	+	2.32	7.76e-12	3.18e-10	Ventricle	Doll
anchoring junction (GO:0070161)	837	62	29.3	+	2.12	1.27e-07	3.32e-06	Ventricle	Doll
membrane protein complex (GO:0098796)	1333	96	46.67	+	2.06	9.8e-11	3.71e-09	Ventricle	Doll
cell leading edge (GO:0031252)	427	30	14.95	+	2.01	0.000562	0.00918	Ventricle	Doll
cell cortex (GO:0005938)	314	22	10.99	+	2	0.00329	0.0435	Ventricle	Doll
organelle membrane (GO:0031090)	3612	252	126.46	+	1.99	7.84e-28	7.87e-26	Ventricle	Doll
membrane raft (GO:0045121)	332	23	11.62	+	1.98	0.00278	0.038	Ventricle	Doll
membrane microdomain (GO:0098857)	333	23	11.66	+	1.97	0.00286	0.0388	Ventricle	Doll
supramolecular complex (GO:0099080)	1338	90	46.84	+	1.92	9.12e-09	2.91e-07	Ventricle	Doll
cell-cell junction (GO:0005911)	497	33	17.4	+	1.9	0.000867	0.0136	Ventricle	Doll
extracellular vesicle (GO:1903561)	2119	137	74.19	+	1.85	7.35e-12	3.14e-10	Ventricle	Doll
extracellular organelle (GO:0043230)	2121	137	74.26	+	1.84	7.62e-12	3.19e-10	Ventricle	Doll
extracellular exosome (GO:0070062)	2098	135	73.45	+	1.84	1.46e-11	5.85e-10	Ventricle	Doll
catalytic complex (GO:1902494)	1401	89	49.05	+	1.81	1.49e-07	3.85e-06	Ventricle	Doll
ribonucleoprotein complex (GO:1990904)	700	43	24.51	+	1.75	0.000603	0.00968	Ventricle	Doll
cytoplasm (GO:0005737)	11717	654	410.22	+	1.59	2.09e-84	1.4e-81	Ventricle	Doll
cytosol (GO:0005829)	5314	287	186.04	+	1.54	1.11e-15	6.36e-14	Ventricle	Doll
organelle lumen (GO:0043233)	6114	322	214.05	+	1.5	1.06e-16	7.11e-15	Ventricle	Doll
intracellular organelle lumen (GO:0070013)	6114	322	214.05	+	1.5	1.06e-16	6.88e-15	Ventricle	Doll
membrane-enclosed lumen (GO:0031974)	6114	322	214.05	+	1.5	1.06e-16	6.67e-15	Ventricle	Doll
cytoskeleton (GO:0005856)	2307	117	80.77	+	1.45	7.76e-05	0.0014	Ventricle	Doll
cell junction (GO:0030054)	2122	103	74.29	+	1.39	0.000999	0.0151	Ventricle	Doll
intracellular membrane-bounded organelle (GO:0043231)	11041	531	386.55	+	1.37	6.46e-27	5.64e-25	Ventricle	Doll
protein-containing complex (GO:0032991)	5532	266	193.68	+	1.37	8.57e-09	2.77e-07	Ventricle	Doll
intracellular organelle (GO:0043229)	12856	615	450.09	+	1.37	1.43e-39	2.06e-37	Ventricle	Doll
membrane-bounded organelle (GO:0043227)	12748	598	446.31	+	1.34	7.68e-33	8.57e-31	Ventricle	Doll
organelle (GO:0043226)	13868	645	485.52	+	1.33	5.01e-41	8.38e-39	Ventricle	Doll
intracellular (GO:0005622)	14704	682	514.79	+	1.32	2.12e-52	3.87e-50	Ventricle	Doll
vesicle (GO:0031982)	3923	177	137.35	+	1.29	0.000372	0.00613	Ventricle	Doll
extracellular space (GO:0005615)	3389	150	118.65	+	1.26	0.00267	0.0369	Ventricle	Doll
membrane (GO:0016020)	9917	426	347.2	+	1.23	1.13e-08	3.55e-07	Ventricle	Doll
cellular anatomical entity (GO:0110165)	18767	713	657.04	+	1.09	1.75e-15	9.78e-14	Ventricle	Doll
cellular_component (GO:0005575)	18951	716	663.48	+	1.08	2.99e-15	1.54e-13	Ventricle	Doll
cell periphery (GO:0071944)	5934	167	207.75	-	0.8	0.000942	0.0143	Ventricle	Doll
plasma membrane (GO:0005886)	5815	160	203.58	-	0.79	0.000341	0.00571	Ventricle	Doll
integral component of membrane (GO:0016021)	5780	157	202.36	-	0.78	0.000172	0.003	Ventricle	Doll
intrinsic component of membrane (GO:0031224)	5937	160	207.86	-	0.77	8.28e-05	0.00148	Ventricle	Doll
intrinsic component of plasma membrane (GO:0031226)	1749	29	61.23	-	0.47	3.98e-06	8.58e-05	Ventricle	Doll
integral component of plasma membrane (GO:0005887)	1668	26	58.4	-	0.45	2.27e-06	5.07e-05	Ventricle	Doll
chromosome (GO:0005694)	2012	19	70.44	-	0.27	2.18e-13	1.04e-11	Ventricle	Doll
Unclassified (UNCLASSIFIED)	1900	14	66.52	-	0.21	2.99e-15	1.58e-13	Ventricle	Doll
nuclear chromosome (GO:0000228)	1542	9	53.99	-	0.17	5.13e-14	2.51e-12	Ventricle	Doll
chromatin (GO:0000785)	1504	6	52.66	-	0.11	4.91e-16	2.99e-14	Ventricle	Doll
nuclear chromatin (GO:0000790)	1316	4	46.07	-	0.09	2.28e-15	1.24e-13	Ventricle	Doll
immunoglobulin complex (GO:0019814)	187	0	6.55	-	< 0.01	0.00335	0.044	Ventricle	Doll
Analysis Type:	PANTHER Overrepresentation Test (Released 20200728)
Annotation Version and Release Date:	GO Ontology database DOI: 10.5281/zenodo.3980761 Released 2020-08-10
Analyzed List:	Doll et al - Atrium
Reference List:	Homo sapiens (all genes in database)
Test Type:	FISHER
Correction:	FDR
GO cellular component complete	Homo sapiens - REFLIST (20851)	Client Text Box Input (1936)	Client Text Box Input (expected)	Client Text Box Input (over/under)	Client Text Box Input (fold Enrichment)	Client Text Box Input (raw P-value)	Client Text Box Input (FDR)
elastic fiber (GO:0071953)	4	4	0.37	+	10.77	0.00275	0.0209	Atrium	Doll
collagen type V trimer (GO:0005588)	4	4	0.37	+	10.77	0.00275	0.0208	Atrium	Doll
membrane attack complex (GO:0005579)	7	7	0.65	+	10.77	6.35e-05	0.000792	Atrium	Doll
intermediate-density lipoprotein particle (GO:0034363)	6	5	0.56	+	8.98	0.00131	0.011	Atrium	Doll
neurofibrillary tangle (GO:0097418)	5	4	0.46	+	8.62	0.00462	0.0335	Atrium	Doll
polar microtubule (GO:0005827)	5	4	0.46	+	8.62	0.00462	0.0334	Atrium	Doll
fibrillar collagen trimer (GO:0005583)	12	9	1.11	+	8.08	2.59e-05	0.000354	Atrium	Doll
banded collagen fibril (GO:0098643)	12	9	1.11	+	8.08	2.59e-05	0.000351	Atrium	Doll
platelet dense granule lumen (GO:0031089)	14	10	1.3	+	7.69	1.23e-05	0.000184	Atrium	Doll
COPI vesicle coat (GO:0030126)	13	9	1.21	+	7.46	4.05e-05	0.000521	Atrium	Doll
microtubule bundle (GO:0097427)	6	4	0.56	+	7.18	0.00718	0.0497	Atrium	Doll
nuclear stress granule (GO:0097165)	6	4	0.56	+	7.18	0.00718	0.0496	Atrium	Doll
clathrin coat of coated pit (GO:0030132)	17	11	1.58	+	6.97	8.9e-06	0.000136	Atrium	Doll
AP-2 adaptor complex (GO:0030122)	11	7	1.02	+	6.85	0.000434	0.00417	Atrium	Doll
chaperonin-containing T-complex (GO:0005832)	11	7	1.02	+	6.85	0.000434	0.00415	Atrium	Doll
fibrinogen complex (GO:0005577)	8	5	0.74	+	6.73	0.00317	0.0239	Atrium	Doll
spherical high-density lipoprotein particle (GO:0034366)	8	5	0.74	+	6.73	0.00317	0.0238	Atrium	Doll
zona pellucida receptor complex (GO:0002199)	8	5	0.74	+	6.73	0.00317	0.0238	Atrium	Doll
chylomicron (GO:0042627)	13	8	1.21	+	6.63	0.000199	0.00218	Atrium	Doll
contractile ring (GO:0070938)	10	6	0.93	+	6.46	0.00142	0.0117	Atrium	Doll
clathrin coat of endocytic vesicle (GO:0030128)	12	7	1.11	+	6.28	0.000637	0.00582	Atrium	Doll
exocyst (GO:0000145)	19	11	1.76	+	6.24	1.93e-05	0.000275	Atrium	Doll
platelet dense granule (GO:0042827)	21	12	1.95	+	6.15	8.92e-06	0.000136	Atrium	Doll
endolysosome membrane (GO:0036020)	14	8	1.3	+	6.15	0.000289	0.003	Atrium	Doll
Arp2/3 protein complex (GO:0005885)	11	6	1.02	+	5.87	0.00203	0.0161	Atrium	Doll
vesicle coat (GO:0030120)	56	30	5.2	+	5.77	6.97e-12	2.46e-10	Atrium	Doll
COPII vesicle coat (GO:0030127)	15	8	1.39	+	5.74	0.00041	0.004	Atrium	Doll
complex of collagen trimers (GO:0098644)	21	11	1.95	+	5.64	3.89e-05	0.000507	Atrium	Doll
clathrin adaptor complex (GO:0030131)	25	13	2.32	+	5.6	8.23e-06	0.000127	Atrium	Doll
clathrin coat of trans-Golgi network vesicle (GO:0030130)	14	7	1.3	+	5.39	0.00126	0.0107	Atrium	Doll
SCAR complex (GO:0031209)	10	5	0.93	+	5.39	0.00641	0.045	Atrium	Doll
COPI-coated vesicle membrane (GO:0030663)	18	9	1.67	+	5.39	0.000258	0.00273	Atrium	Doll
nuclear pore outer ring (GO:0031080)	10	5	0.93	+	5.39	0.00641	0.0448	Atrium	Doll
platelet alpha granule lumen (GO:0031093)	67	32	6.22	+	5.14	1.45e-11	4.78e-10	Atrium	Doll
triglyceride-rich plasma lipoprotein particle (GO:0034385)	21	10	1.95	+	5.13	0.000161	0.00181	Atrium	Doll
very-low-density lipoprotein particle (GO:0034361)	21	10	1.95	+	5.13	0.000161	0.0018	Atrium	Doll
high-density lipoprotein particle (GO:0034364)	28	13	2.6	+	5	2.1e-05	0.000297	Atrium	Doll
blood microparticle (GO:0072562)	144	65	13.37	+	4.86	5.15e-21	2.72e-19	Atrium	Doll
endolysosome (GO:0036019)	20	9	1.86	+	4.85	0.000472	0.00447	Atrium	Doll
clathrin vesicle coat (GO:0030125)	29	13	2.69	+	4.83	2.81e-05	0.000376	Atrium	Doll
pseudopodium (GO:0031143)	18	8	1.67	+	4.79	0.00104	0.00906	Atrium	Doll
trans-Golgi network transport vesicle membrane (GO:0012510)	16	7	1.49	+	4.71	0.00229	0.0179	Atrium	Doll
mitochondria-associated endoplasmic reticulum membrane (GO:0044233)	16	7	1.49	+	4.71	0.00229	0.0178	Atrium	Doll
pore complex (GO:0046930)	23	10	2.14	+	4.68	0.000286	0.00299	Atrium	Doll
platelet alpha granule (GO:0031091)	91	39	8.45	+	4.62	1.28e-12	4.68e-11	Atrium	Doll
endocytic vesicle lumen (GO:0071682)	21	9	1.95	+	4.62	0.000624	0.00572	Atrium	Doll
septin ring (GO:0005940)	14	6	1.3	+	4.62	0.0051	0.0364	Atrium	Doll
septin complex (GO:0031105)	14	6	1.3	+	4.62	0.0051	0.0363	Atrium	Doll
clathrin coat (GO:0030118)	47	20	4.36	+	4.58	4.08e-07	7.87e-06	Atrium	Doll
glycoprotein complex (GO:0090665)	19	8	1.76	+	4.53	0.00137	0.0114	Atrium	Doll
dystrophin-associated glycoprotein complex (GO:0016010)	19	8	1.76	+	4.53	0.00137	0.0113	Atrium	Doll
filamentous actin (GO:0031941)	34	14	3.16	+	4.43	2.95e-05	0.000393	Atrium	Doll
proteasome regulatory particle (GO:0005838)	22	9	2.04	+	4.41	0.000814	0.0072	Atrium	Doll
chaperone complex (GO:0101031)	25	10	2.32	+	4.31	0.000485	0.00458	Atrium	Doll
septin cytoskeleton (GO:0032156)	15	6	1.39	+	4.31	0.00663	0.0462	Atrium	Doll
COPI-coated vesicle (GO:0030137)	28	11	2.6	+	4.23	0.00029	0.003	Atrium	Doll
filopodium membrane (GO:0031527)	18	7	1.67	+	4.19	0.00387	0.0283	Atrium	Doll
membrane coat (GO:0030117)	96	37	8.91	+	4.15	5.64e-11	1.77e-09	Atrium	Doll
coated membrane (GO:0048475)	96	37	8.91	+	4.15	5.64e-11	1.74e-09	Atrium	Doll
collagen-containing extracellular matrix (GO:0062023)	427	159	39.65	+	4.01	1.68e-41	2.25e-39	Atrium	Doll
organelle membrane contact site (GO:0044232)	35	13	3.25	+	4	0.000131	0.00151	Atrium	Doll
smooth endoplasmic reticulum (GO:0005790)	35	13	3.25	+	4	0.000131	0.00151	Atrium	Doll
actomyosin (GO:0042641)	83	30	7.71	+	3.89	1.19e-08	2.96e-07	Atrium	Doll
contractile actin filament bundle (GO:0097517)	72	26	6.69	+	3.89	1.12e-07	2.37e-06	Atrium	Doll
stress fiber (GO:0001725)	72	26	6.69	+	3.89	1.12e-07	2.34e-06	Atrium	Doll
proteasome accessory complex (GO:0022624)	25	9	2.32	+	3.88	0.00168	0.0136	Atrium	Doll
trans-Golgi network transport vesicle (GO:0030140)	34	12	3.16	+	3.8	0.000346	0.00347	Atrium	Doll
lipoprotein particle (GO:1990777)	37	13	3.44	+	3.78	0.000206	0.00224	Atrium	Doll
plasma lipoprotein particle (GO:0034358)	37	13	3.44	+	3.78	0.000206	0.00223	Atrium	Doll
endoplasmic reticulum lumen (GO:0005788)	313	109	29.06	+	3.75	1.05e-26	8.1e-25	Atrium	Doll
podosome (GO:0002102)	29	10	2.69	+	3.71	0.00123	0.0104	Atrium	Doll
secretory granule lumen (GO:0034774)	321	110	29.8	+	3.69	1.81e-26	1.35e-24	Atrium	Doll
vesicle lumen (GO:0031983)	327	112	30.36	+	3.69	6.46e-27	5.19e-25	Atrium	Doll
cytoplasmic vesicle lumen (GO:0060205)	325	110	30.18	+	3.65	4.17e-26	2.89e-24	Atrium	Doll
AP-type membrane coat adaptor complex (GO:0030119)	42	14	3.9	+	3.59	0.000186	0.00206	Atrium	Doll
collagen trimer (GO:0005581)	90	30	8.36	+	3.59	5.28e-08	1.18e-06	Atrium	Doll
actin filament bundle (GO:0032432)	79	26	7.34	+	3.54	4.9e-07	9.11e-06	Atrium	Doll
basement membrane (GO:0005604)	104	34	9.66	+	3.52	1.04e-08	2.62e-07	Atrium	Doll
protein-lipid complex (GO:0032994)	40	13	3.71	+	3.5	0.000383	0.00381	Atrium	Doll
clathrin-coated pit (GO:0005905)	71	23	6.59	+	3.49	2.74e-06	4.51e-05	Atrium	Doll
melanosome (GO:0042470)	105	34	9.75	+	3.49	1.27e-08	3.07e-07	Atrium	Doll
pigment granule (GO:0048770)	105	34	9.75	+	3.49	1.27e-08	3.03e-07	Atrium	Doll
rough endoplasmic reticulum membrane (GO:0030867)	31	10	2.88	+	3.47	0.00185	0.015	Atrium	Doll
extracellular matrix (GO:0031012)	569	181	52.83	+	3.43	1.43e-39	1.6e-37	Atrium	Doll
actin filament (GO:0005884)	123	39	11.42	+	3.41	1.82e-09	4.99e-08	Atrium	Doll
coated vesicle membrane (GO:0030662)	182	57	16.9	+	3.37	5.38e-13	2e-11	Atrium	Doll
integrin complex (GO:0008305)	32	10	2.97	+	3.37	0.00225	0.0177	Atrium	Doll
Golgi-associated vesicle membrane (GO:0030660)	112	35	10.4	+	3.37	1.64e-08	3.88e-07	Atrium	Doll
azurophil granule lumen (GO:0035578)	90	28	8.36	+	3.35	4.66e-07	8.74e-06	Atrium	Doll
myelin sheath (GO:0043209)	49	15	4.55	+	3.3	0.000241	0.00259	Atrium	Doll
endoplasmic reticulum exit site (GO:0070971)	33	10	3.06	+	3.26	0.00271	0.0207	Atrium	Doll
nuclear pore (GO:0005643)	84	25	7.8	+	3.21	3.64e-06	5.9e-05	Atrium	Doll
protein complex involved in cell adhesion (GO:0098636)	37	11	3.44	+	3.2	0.00192	0.0154	Atrium	Doll
Golgi lumen (GO:0005796)	103	30	9.56	+	3.14	5.93e-07	1.08e-05	Atrium	Doll
phagocytic vesicle membrane (GO:0030670)	77	22	7.15	+	3.08	2.32e-05	0.000326	Atrium	Doll
focal adhesion (GO:0005925)	417	117	38.72	+	3.02	5.2e-22	2.9e-20	Atrium	Doll
cell-substrate junction (GO:0030055)	425	119	39.46	+	3.02	2.62e-22	1.55e-20	Atrium	Doll
coated vesicle (GO:0030135)	301	84	27.95	+	3.01	4.99e-16	1.96e-14	Atrium	Doll
vacuolar lumen (GO:0005775)	172	48	15.97	+	3.01	9.32e-10	2.79e-08	Atrium	Doll
ER to Golgi transport vesicle membrane (GO:0012507)	61	17	5.66	+	3	0.000244	0.00261	Atrium	Doll
Golgi-associated vesicle (GO:0005798)	184	51	17.08	+	2.99	3.43e-10	1.04e-08	Atrium	Doll
myosin complex (GO:0016459)	58	16	5.39	+	2.97	0.000405	0.00397	Atrium	Doll
ficolin-1-rich granule (GO:0101002)	124	34	11.51	+	2.95	3.55e-07	6.99e-06	Atrium	Doll
ficolin-1-rich granule lumen (GO:1904813)	124	34	11.51	+	2.95	3.55e-07	6.92e-06	Atrium	Doll
vesicle tethering complex (GO:0099023)	73	20	6.78	+	2.95	8.77e-05	0.00107	Atrium	Doll
clathrin-coated vesicle membrane (GO:0030665)	118	32	10.96	+	2.92	9.5e-07	1.69e-05	Atrium	Doll
site of polarized growth (GO:0030427)	195	52	18.11	+	2.87	9.91e-10	2.88e-08	Atrium	Doll
growth cone (GO:0030426)	188	50	17.46	+	2.86	2.25e-09	6.1e-08	Atrium	Doll
clathrin-coated vesicle (GO:0030136)	196	52	18.2	+	2.86	1.09e-09	3.12e-08	Atrium	Doll
catalytic step 2 spliceosome (GO:0071013)	87	23	8.08	+	2.85	4.29e-05	0.000549	Atrium	Doll
COPII-coated ER to Golgi transport vesicle (GO:0030134)	96	25	8.91	+	2.8	2.52e-05	0.000349	Atrium	Doll
specific granule lumen (GO:0035580)	62	16	5.76	+	2.78	0.000749	0.00672	Atrium	Doll
host cellular component (GO:0018995)	66	17	6.13	+	2.77	0.000529	0.00496	Atrium	Doll
host cell (GO:0043657)	66	17	6.13	+	2.77	0.000529	0.00494	Atrium	Doll
actin cytoskeleton (GO:0015629)	515	131	47.82	+	2.74	2.53e-21	1.37e-19	Atrium	Doll
nuclear periphery (GO:0034399)	134	34	12.44	+	2.73	1.89e-06	3.22e-05	Atrium	Doll
azurophil granule (GO:0042582)	154	39	14.3	+	2.73	3.24e-07	6.51e-06	Atrium	Doll
primary lysosome (GO:0005766)	154	39	14.3	+	2.73	3.24e-07	6.45e-06	Atrium	Doll
extracellular exosome (GO:0070062)	2098	527	194.8	+	2.71	2.75e-89	1.84e-86	Atrium	Doll
extracellular vesicle (GO:1903561)	2119	532	196.75	+	2.7	5.48e-90	1.1e-86	Atrium	Doll
extracellular organelle (GO:0043230)	2121	532	196.93	+	2.7	6.23e-90	6.26e-87	Atrium	Doll
rough endoplasmic reticulum (GO:0005791)	88	22	8.17	+	2.69	0.000181	0.00201	Atrium	Doll
phagocytic vesicle (GO:0045335)	141	35	13.09	+	2.67	1.86e-06	3.2e-05	Atrium	Doll
cortical actin cytoskeleton (GO:0030864)	81	20	7.52	+	2.66	0.000411	0.00399	Atrium	Doll
lamellipodium (GO:0030027)	203	50	18.85	+	2.65	1.79e-08	4.17e-07	Atrium	Doll
precatalytic spliceosome (GO:0071011)	53	13	4.92	+	2.64	0.00331	0.0245	Atrium	Doll
ruffle (GO:0001726)	180	44	16.71	+	2.63	1.68e-07	3.48e-06	Atrium	Doll
endoplasmic reticulum-Golgi intermediate compartment (GO:0005793)	135	33	12.53	+	2.63	4.73e-06	7.54e-05	Atrium	Doll
recycling endosome membrane (GO:0055038)	87	21	8.08	+	2.6	0.000332	0.00335	Atrium	Doll
U2-type precatalytic spliceosome (GO:0071005)	50	12	4.64	+	2.58	0.00542	0.0383	Atrium	Doll
autophagosome (GO:0005776)	101	24	9.38	+	2.56	0.000138	0.00157	Atrium	Doll
clathrin-coated endocytic vesicle membrane (GO:0030669)	76	18	7.06	+	2.55	0.00109	0.00937	Atrium	Doll
filopodium (GO:0030175)	106	25	9.84	+	2.54	0.000108	0.00129	Atrium	Doll
contractile fiber (GO:0043292)	242	57	22.47	+	2.54	6.61e-09	1.7e-07	Atrium	Doll
endoplasmic reticulum-Golgi intermediate compartment membrane (GO:0033116)	77	18	7.15	+	2.52	0.00118	0.0101	Atrium	Doll
Z disc (GO:0030018)	129	30	11.98	+	2.5	3.77e-05	0.000495	Atrium	Doll
endocytic vesicle membrane (GO:0030666)	196	45	18.2	+	2.47	5.29e-07	9.74e-06	Atrium	Doll
myofibril (GO:0030016)	231	53	21.45	+	2.47	4.33e-08	9.77e-07	Atrium	Doll
nuclear matrix (GO:0016363)	109	25	10.12	+	2.47	0.000234	0.00252	Atrium	Doll
secretory granule (GO:0030141)	861	196	79.94	+	2.45	2.55e-26	1.83e-24	Atrium	Doll
cortical cytoskeleton (GO:0030863)	110	25	10.21	+	2.45	0.000246	0.00261	Atrium	Doll
sarcomere (GO:0030017)	209	47	19.41	+	2.42	4.12e-07	7.88e-06	Atrium	Doll
neuron projection cytoplasm (GO:0120111)	89	20	8.26	+	2.42	0.000861	0.00758	Atrium	Doll
clathrin-coated endocytic vesicle (GO:0045334)	94	21	8.73	+	2.41	0.00106	0.00921	Atrium	Doll
microvillus (GO:0005902)	94	21	8.73	+	2.41	0.00106	0.00918	Atrium	Doll
cell division site (GO:0032153)	72	16	6.69	+	2.39	0.00322	0.0239	Atrium	Doll
trans-Golgi network membrane (GO:0032588)	95	21	8.82	+	2.38	0.00111	0.0095	Atrium	Doll
cell cortex (GO:0005938)	314	69	29.15	+	2.37	2.49e-09	6.68e-08	Atrium	Doll
lysosomal lumen (GO:0043202)	96	21	8.91	+	2.36	0.00117	0.00996	Atrium	Doll
anchoring junction (GO:0070161)	837	183	77.71	+	2.35	9.21e-23	5.61e-21	Atrium	Doll
I band (GO:0031674)	142	31	13.18	+	2.35	8.5e-05	0.00105	Atrium	Doll
transport vesicle membrane (GO:0030658)	212	46	19.68	+	2.34	1.43e-06	2.5e-05	Atrium	Doll
cell leading edge (GO:0031252)	427	91	39.65	+	2.3	2.48e-11	8.05e-10	Atrium	Doll
secretory vesicle (GO:0099503)	1027	217	95.36	+	2.28	2.09e-25	1.4e-23	Atrium	Doll
ruffle membrane (GO:0032587)	95	20	8.82	+	2.27	0.00201	0.016	Atrium	Doll
spliceosomal complex (GO:0005681)	195	41	18.11	+	2.26	9.87e-06	0.000149	Atrium	Doll
adherens junction (GO:0005912)	167	35	15.51	+	2.26	5.9e-05	0.000745	Atrium	Doll
endocytic vesicle (GO:0030139)	341	71	31.66	+	2.24	1e-08	2.55e-07	Atrium	Doll
extrinsic component of cytoplasmic side of plasma membrane (GO:0031234)	101	21	9.38	+	2.24	0.00164	0.0134	Atrium	Doll
specific granule (GO:0042581)	160	33	14.86	+	2.22	0.000123	0.00143	Atrium	Doll
distal axon (GO:0150034)	313	64	29.06	+	2.2	1.06e-07	2.27e-06	Atrium	Doll
recycling endosome (GO:0055037)	192	39	17.83	+	2.19	3.91e-05	0.000507	Atrium	Doll
extracellular space (GO:0005615)	3389	681	314.67	+	2.16	1.24e-81	4.15e-79	Atrium	Doll
vesicle membrane (GO:0012506)	810	162	75.21	+	2.15	3.62e-17	1.69e-15	Atrium	Doll
early endosome (GO:0005769)	380	76	35.28	+	2.15	1.25e-08	3.05e-07	Atrium	Doll
cytoplasmic vesicle membrane (GO:0030659)	788	157	73.17	+	2.15	1.7e-16	6.98e-15	Atrium	Doll
extrinsic component of plasma membrane (GO:0019897)	177	35	16.43	+	2.13	0.000156	0.00177	Atrium	Doll
vacuole (GO:0005773)	815	161	75.67	+	2.13	1.21e-16	5.06e-15	Atrium	Doll
early endosome membrane (GO:0031901)	163	32	15.13	+	2.11	0.000393	0.00388	Atrium	Doll
lytic vacuole (GO:0000323)	716	140	66.48	+	2.11	2.78e-14	1.07e-12	Atrium	Doll
lysosome (GO:0005764)	716	140	66.48	+	2.11	2.78e-14	1.05e-12	Atrium	Doll
vesicle (GO:0031982)	3923	765	364.25	+	2.1	3.9e-89	1.96e-86	Atrium	Doll
endoplasmic reticulum (GO:0005783)	1472	287	136.67	+	2.1	9.19e-29	8.02e-27	Atrium	Doll
secretory granule membrane (GO:0030667)	306	59	28.41	+	2.08	1.57e-06	2.72e-05	Atrium	Doll
neuron spine (GO:0044309)	177	34	16.43	+	2.07	0.000268	0.00282	Atrium	Doll
intrinsic component of endoplasmic reticulum membrane (GO:0031227)	172	33	15.97	+	2.07	0.00035	0.0035	Atrium	Doll
sarcolemma (GO:0042383)	136	26	12.63	+	2.06	0.00158	0.0129	Atrium	Doll
nuclear membrane (GO:0031965)	304	58	28.23	+	2.05	2.42e-06	4.02e-05	Atrium	Doll
endosome membrane (GO:0010008)	505	96	46.89	+	2.05	1.76e-09	4.97e-08	Atrium	Doll
brush border (GO:0005903)	111	21	10.31	+	2.04	0.00446	0.0325	Atrium	Doll
integral component of endoplasmic reticulum membrane (GO:0030176)	164	31	15.23	+	2.04	0.000669	0.00605	Atrium	Doll
transport vesicle (GO:0030133)	418	79	38.81	+	2.04	5.35e-08	1.18e-06	Atrium	Doll
dendritic spine (GO:0043197)	175	33	16.25	+	2.03	0.000419	0.00405	Atrium	Doll
supramolecular polymer (GO:0099081)	1020	192	94.71	+	2.03	9.07e-18	4.44e-16	Atrium	Doll
lytic vacuole membrane (GO:0098852)	383	72	35.56	+	2.02	2.48e-07	5.08e-06	Atrium	Doll
lysosomal membrane (GO:0005765)	383	72	35.56	+	2.02	2.48e-07	5.02e-06	Atrium	Doll
supramolecular fiber (GO:0099512)	1012	190	93.96	+	2.02	1.74e-17	8.32e-16	Atrium	Doll
extrinsic component of membrane (GO:0019898)	311	58	28.88	+	2.01	4.75e-06	7.51e-05	Atrium	Doll
fibrillar center (GO:0001650)	129	24	11.98	+	2	0.0032	0.0239	Atrium	Doll
vacuolar membrane (GO:0005774)	436	81	40.48	+	2	6.51e-08	1.42e-06	Atrium	Doll
actin-based cell projection (GO:0098858)	221	41	20.52	+	2	0.000127	0.00148	Atrium	Doll
trans-Golgi network (GO:0005802)	248	46	23.03	+	2	5.14e-05	0.000653	Atrium	Doll
nuclear envelope (GO:0005635)	476	88	44.2	+	1.99	2.43e-08	5.62e-07	Atrium	Doll
perinuclear region of cytoplasm (GO:0048471)	734	134	68.15	+	1.97	7.88e-12	2.68e-10	Atrium	Doll
whole membrane (GO:0098805)	1739	317	161.46	+	1.96	2.25e-27	1.88e-25	Atrium	Doll
intracellular vesicle (GO:0097708)	2438	443	226.37	+	1.96	5.45e-39	5.76e-37	Atrium	Doll
cytoplasmic vesicle (GO:0031410)	2434	442	226	+	1.96	7.79e-39	7.82e-37	Atrium	Doll
supramolecular complex (GO:0099080)	1338	242	124.23	+	1.95	2.57e-20	1.33e-18	Atrium	Doll
membrane raft (GO:0045121)	332	59	30.83	+	1.91	1.41e-05	0.000207	Atrium	Doll
membrane microdomain (GO:0098857)	333	59	30.92	+	1.91	1.48e-05	0.000216	Atrium	Doll
membrane region (GO:0098589)	346	61	32.13	+	1.9	1.35e-05	0.000199	Atrium	Doll
extracellular region (GO:0005576)	4395	774	408.07	+	1.9	1.39e-71	3.48e-69	Atrium	Doll
leading edge membrane (GO:0031256)	177	31	16.43	+	1.89	0.00239	0.0184	Atrium	Doll
axon (GO:0030424)	657	114	61	+	1.87	5.1e-09	1.33e-07	Atrium	Doll
cell-cell junction (GO:0005911)	497	85	46.15	+	1.84	7.81e-07	1.4e-05	Atrium	Doll
organelle subcompartment (GO:0031984)	398	68	36.95	+	1.84	1.06e-05	0.000159	Atrium	Doll
Golgi apparatus subcompartment (GO:0098791)	371	63	34.45	+	1.83	2.59e-05	0.000349	Atrium	Doll
cell junction (GO:0030054)	2122	355	197.03	+	1.8	1.11e-24	7.16e-23	Atrium	Doll
endosome (GO:0005768)	984	163	91.36	+	1.78	4.73e-11	1.51e-09	Atrium	Doll
organelle outer membrane (GO:0031968)	224	37	20.8	+	1.78	0.00232	0.018	Atrium	Doll
endomembrane system (GO:0012505)	4631	764	429.98	+	1.78	4.76e-59	8.69e-57	Atrium	Doll
nuclear outer membrane-endoplasmic reticulum membrane network (GO:0042175)	1144	188	106.22	+	1.77	1.89e-12	6.76e-11	Atrium	Doll
bounding membrane of organelle (GO:0098588)	2149	352	199.53	+	1.76	4.4e-23	2.76e-21	Atrium	Doll
outer membrane (GO:0019867)	226	37	20.98	+	1.76	0.00244	0.0188	Atrium	Doll
Golgi apparatus (GO:0005794)	1615	264	149.95	+	1.76	5.93e-17	2.71e-15	Atrium	Doll
endoplasmic reticulum membrane (GO:0005789)	1122	183	104.18	+	1.76	7.18e-12	2.48e-10	Atrium	Doll
synaptic vesicle (GO:0008021)	209	34	19.41	+	1.75	0.00363	0.0268	Atrium	Doll
mitochondrial outer membrane (GO:0005741)	198	32	18.38	+	1.74	0.0058	0.0409	Atrium	Doll
exocytic vesicle (GO:0070382)	229	37	21.26	+	1.74	0.00268	0.0206	Atrium	Doll
polymeric cytoskeletal fiber (GO:0099513)	781	126	72.52	+	1.74	3.53e-08	8.05e-07	Atrium	Doll
glutamatergic synapse (GO:0098978)	373	60	34.63	+	1.73	0.000164	0.00183	Atrium	Doll
cell projection membrane (GO:0031253)	349	56	32.4	+	1.73	0.000291	0.003	Atrium	Doll
Golgi membrane (GO:0000139)	769	123	71.4	+	1.72	7.86e-08	1.7e-06	Atrium	Doll
intrinsic component of organelle membrane (GO:0031300)	413	66	38.35	+	1.72	8.94e-05	0.00109	Atrium	Doll
microtubule (GO:0005874)	439	69	40.76	+	1.69	0.000101	0.00121	Atrium	Doll
cell body (GO:0044297)	606	95	56.27	+	1.69	4.95e-06	7.76e-05	Atrium	Doll
ribonucleoprotein granule (GO:0035770)	245	38	22.75	+	1.67	0.00497	0.0356	Atrium	Doll
synapse (GO:0045202)	1383	214	128.41	+	1.67	8.17e-12	2.74e-10	Atrium	Doll
neuron to neuron synapse (GO:0098984)	376	58	34.91	+	1.66	0.00064	0.00581	Atrium	Doll
postsynaptic density (GO:0014069)	345	53	32.03	+	1.65	0.00103	0.00905	Atrium	Doll
nuclear speck (GO:0016607)	404	62	37.51	+	1.65	0.000395	0.00389	Atrium	Doll
cytosol (GO:0005829)	5314	809	493.4	+	1.64	5.74e-50	8.87e-48	Atrium	Doll
asymmetric synapse (GO:0032279)	351	53	32.59	+	1.63	0.00153	0.0126	Atrium	Doll
neuronal cell body (GO:0043025)	533	80	49.49	+	1.62	0.000122	0.00144	Atrium	Doll
integral component of organelle membrane (GO:0031301)	382	57	35.47	+	1.61	0.00131	0.011	Atrium	Doll
postsynapse (GO:0098794)	651	97	60.44	+	1.6	2.48e-05	0.000346	Atrium	Doll
cytoskeleton (GO:0005856)	2307	343	214.2	+	1.6	1.71e-16	6.88e-15	Atrium	Doll
postsynaptic specialization (GO:0099572)	370	55	34.35	+	1.6	0.00198	0.0159	Atrium	Doll
side of membrane (GO:0098552)	655	96	60.82	+	1.58	5.96e-05	0.000748	Atrium	Doll
presynapse (GO:0098793)	536	78	49.77	+	1.57	0.000312	0.00318	Atrium	Doll
cell surface (GO:0009986)	947	136	87.93	+	1.55	3.27e-06	5.34e-05	Atrium	Doll
nuclear body (GO:0016604)	795	114	73.82	+	1.54	2.57e-05	0.000354	Atrium	Doll
ribonucleoprotein complex (GO:1990904)	700	100	64.99	+	1.54	9.97e-05	0.00121	Atrium	Doll
organelle membrane (GO:0031090)	3612	515	335.37	+	1.54	3.67e-22	2.1e-20	Atrium	Doll
somatodendritic compartment (GO:0036477)	872	124	80.96	+	1.53	1.56e-05	0.000224	Atrium	Doll
spindle (GO:0005819)	373	53	34.63	+	1.53	0.00486	0.035	Atrium	Doll
dendrite (GO:0030425)	621	87	57.66	+	1.51	0.000459	0.00437	Atrium	Doll
dendritic tree (GO:0097447)	623	87	57.85	+	1.5	0.000595	0.00548	Atrium	Doll
neuron projection (GO:0043005)	1395	192	129.52	+	1.48	4.19e-07	7.94e-06	Atrium	Doll
protein-containing complex (GO:0032991)	5532	757	513.64	+	1.47	1.92e-30	1.75e-28	Atrium	Doll
membrane protein complex (GO:0098796)	1333	181	123.77	+	1.46	2.14e-06	3.59e-05	Atrium	Doll
cell projection (GO:0042995)	2352	313	218.38	+	1.43	9.34e-10	2.76e-08	Atrium	Doll
plasma membrane bounded cell projection (GO:0120025)	2255	299	209.38	+	1.43	3.06e-09	8.08e-08	Atrium	Doll
cytoplasm (GO:0005737)	11717	1518	1087.91	+	1.4	6.5e-86	2.61e-83	Atrium	Doll
plasma membrane region (GO:0098590)	1245	160	115.6	+	1.38	0.000113	0.00134	Atrium	Doll
plasma membrane protein complex (GO:0098797)	708	90	65.74	+	1.37	0.00539	0.0383	Atrium	Doll
microtubule cytoskeleton (GO:0015630)	1278	161	118.66	+	1.36	0.000292	0.00299	Atrium	Doll
envelope (GO:0031975)	1229	153	114.11	+	1.34	0.000587	0.00545	Atrium	Doll
organelle envelope (GO:0031967)	1229	153	114.11	+	1.34	0.000587	0.00543	Atrium	Doll
organelle lumen (GO:0043233)	6114	748	567.68	+	1.32	6.12e-17	2.73e-15	Atrium	Doll
intracellular organelle lumen (GO:0070013)	6114	748	567.68	+	1.32	6.12e-17	2.67e-15	Atrium	Doll
membrane-enclosed lumen (GO:0031974)	6114	748	567.68	+	1.32	6.12e-17	2.61e-15	Atrium	Doll
membrane-bounded organelle (GO:0043227)	12748	1553	1183.64	+	1.31	2.77e-67	6.18e-65	Atrium	Doll
organelle (GO:0043226)	13868	1654	1287.63	+	1.28	5.07e-74	1.46e-71	Atrium	Doll
intracellular organelle (GO:0043229)	12856	1514	1193.67	+	1.27	1.63e-50	2.72e-48	Atrium	Doll
intracellular membrane-bounded organelle (GO:0043231)	11041	1286	1025.15	+	1.25	1.37e-30	1.31e-28	Atrium	Doll
intracellular (GO:0005622)	14704	1684	1365.26	+	1.23	4.39e-61	8.82e-59	Atrium	Doll
membrane (GO:0016020)	9917	1130	920.79	+	1.23	8.58e-20	4.31e-18	Atrium	Doll
nucleoplasm (GO:0005654)	3990	454	370.47	+	1.23	7.73e-06	0.00012	Atrium	Doll
non-membrane-bounded organelle (GO:0043228)	5283	592	490.52	+	1.21	7.49e-07	1.35e-05	Atrium	Doll
intracellular non-membrane-bounded organelle (GO:0043232)	5274	589	489.69	+	1.2	1.28e-06	2.26e-05	Atrium	Doll
cell periphery (GO:0071944)	5934	635	550.97	+	1.15	6.65e-05	0.000824	Atrium	Doll
plasma membrane (GO:0005886)	5815	615	539.92	+	1.14	0.000329	0.00334	Atrium	Doll
nucleus (GO:0005634)	7578	797	703.61	+	1.13	3.09e-05	0.000408	Atrium	Doll
cellular anatomical entity (GO:0110165)	18767	1899	1742.5	+	1.09	2.76e-43	3.95e-41	Atrium	Doll
cellular_component (GO:0005575)	18951	1905	1759.59	+	1.08	3.06e-41	3.61e-39	Atrium	Doll
intrinsic component of membrane (GO:0031224)	5937	472	551.25	-	0.86	0.000114	0.00134	Atrium	Doll
integral component of membrane (GO:0016021)	5780	449	536.67	-	0.84	1.55e-05	0.000224	Atrium	Doll
intrinsic component of plasma membrane (GO:0031226)	1749	126	162.39	-	0.78	0.00373	0.0275	Atrium	Doll
integral component of plasma membrane (GO:0005887)	1668	116	154.87	-	0.75	0.00143	0.0118	Atrium	Doll
chromatin (GO:0000785)	1504	88	139.65	-	0.63	4.61e-06	7.41e-05	Atrium	Doll
nuclear chromosome (GO:0000228)	1542	89	143.17	-	0.62	1.91e-06	3.22e-05	Atrium	Doll
mitochondrial inner membrane (GO:0005743)	497	27	46.15	-	0.59	0.0042	0.0306	Atrium	Doll
nuclear chromatin (GO:0000790)	1316	61	122.19	-	0.5	1.8e-09	5.03e-08	Atrium	Doll
Unclassified (UNCLASSIFIED)	1900	31	176.41	-	0.18	3.06e-41	3.83e-39	Atrium	Doll
T cell receptor complex (GO:0042101)	141	2	13.09	-	0.15	0.000713	0.00642	Atrium	Doll
mitochondrial respirasome (GO:0005746)	89	1	8.26	-	0.12	0.00669	0.0465	Atrium	Doll
respirasome (GO:0070469)	100	1	9.28	-	0.11	0.00208	0.0165	Atrium	Doll
keratin filament (GO:0045095)	101	1	9.38	-	0.11	0.00209	0.0164	Atrium	Doll
organellar ribosome (GO:0000313)	89	0	8.26	-	< 0.01	0.000796	0.0071	Atrium	Doll
mitochondrial ribosome (GO:0005761)	89	0	8.26	-	< 0.01	0.000796	0.00707	Atrium	Doll
