# Supplementary material for: Proteomic mapping of atrial and ventricular heart tissue in patients with aortic valve stenosis
Source: Sci Rep. 2021 Dec 22;11:24389. doi: 10.1038/s41598-021-03907-3 (PMC8695579; doi:10.1038/s41598-021-03907-3)
Supplement: Supplementary file 7 — Supplementary Table 4. [file 41598_2021_3907_MOESM7_ESM.xlsx]

## Sheet: Legend
Supplementary Table 4 - Protein-Protein comparison of all significantly regulated atrial and ventricular proteins from the current study and to the dataset of Doll et al. (Doll et al 2017: Supplementary Data 5. Differentially expressed proteins in the ventricular vs. atrial region)

## Sheet: Comparison to Doll et al
Protein Name	Gene Name	This study logFC (atria / ventricle)	This Study -log10(adj.P.Value)	Doll et al logFC (atria / ventricle)	Doll et al -log10(adj.P.Value)	Significant	opposing chamber	regression	Y - distance to regession line	outside Y = 2 from regression (1=Yes, 0=no)
Protein S100-A1;Protein S100	S100A1	-5.9095	2.59811	-0.336803	0.884232	1	0	1	-5.45486	1
Amyloid beta A4 protein;N-APP;Soluble APP-alpha;Soluble APP-beta;C99;Beta-amyloid protein 42;Beta-amyloid protein 40;C83;P3(42);P3(40);C80;Gamma-secretase C-terminal fragment 59;Gamma-secretase C-terminal fragment 57;Gamma-secretase C-terminal fragment 50;C31	APP	-0.0655679	0.0262682	4.95642	1.38405	2	1	1	-5.19568	1
Voltage-dependent calcium channel subunit alpha-2/delta-2;Voltage-dependent calcium channel subunit alpha-2-2;Voltage-dependent calcium channel subunit delta-2	CACNA2D2	-0.169455	0.0655456	4.66892	5.29494	2	1	1	-4.99624	1
Collagen alpha-1(II) chain;Collagen alpha-1(II) chain;Chondrocalcin	COL2A1	0.491951	0.572353	4.58165	2.16849	2	0	1	-4.24275	1
NA	TNC;TNC variant protein	-0.663291	0.321532	3.34215	5.68727	2	1	1	-4.09022	1
NA	MYH7	-5.32719	2.78718	-1.14897	4.46177	3	0	1	-4.01565	1
Myosin light chain 3	MYL3	-8.85947	19.1522	-4.56032	7.47683	3	0	1	-3.94871	1
5-nucleotidase domain-containing protein 2	NT5DC2	0.745092	1.02293	4.36168	5.43401	2	0	1	-3.75752	1
Peptidyl-prolyl cis-trans isomerase FKBP10	FKBP10;DKFZp666D193	0.135655	0.0636313	3.34623	3.35838	2	0	1	-3.29559	1
Actin, alpha cardiac muscle 1;Actin, aortic smooth muscle;Actin, gamma-enteric smooth muscle	ACTC1;ACTA2;ACTG2	-0.802718	1.41117	2.21982	2.7166	3	1	1	-3.04551	1
Sorbin and SH3 domain-containing protein 1	SORBS1	-1.40387	5.04873	1.50226	1.99614	3	1	1	-2.88959	1
Periostin	POSTN	-0.0746683	0.0172163	2.66864	6.91015	2	1	1	-2.791	1
Troponin I, slow skeletal muscle	TNNI1	1.50629	1.93342	4.06979	4.37521	3	0	1	-2.68836	1
MICOS complex subunit MIC60	IMMT	0.127343	0.168549	2.69006	2.33575	2	0	1	-2.61159	1
Myosin-4	MYH4	1.2053	1.13532	3.67098	1.88565	2	0	1	-2.56858	1
SAFB-like transcription modulator	SLTM	0.280288	0.206111	2.7768	3.75546	2	0	1	-2.55016	1
Latent-transforming growth factor beta-binding protein 1	LTBP1	0.47413	0.383339	2.85372	6.03919	2	0	1	-2.43747	1
Keratin, type I cytoskeletal 18	KRT18	0.70986	1.51189	3.01842	3.54873	3	0	1	-2.37552	1
Heterogeneous nuclear ribonucleoprotein L-like	HNRNPLL;HNRPLL	-0.574385	0.484031	1.77397	3.25999	2	1	1	-2.34678	1
Histone deacetylase;Histone deacetylase 2	HDAC2	-0.101918	0.033994	2.17477	1.65241	2	1	1	-2.29718	1
Myosin regulatory light chain 2, ventricular/cardiac muscle isoform	MYL2	-4.27986	16.9611	-1.79159	3.5746	3	0	1	-2.29032	1
Galectin-3-binding protein	LGALS3BP	-2.77095	3.81033	-0.379727	0.652164	1	0	1	-2.27103	1
Dermatopontin	DPT	-0.808528	0.138823	1.47731	3.51581	2	1	1	-2.26792	1
Pre-mRNA 3-end-processing factor FIP1	FIP1L1	0.328778	0.214538	2.5402	3.73885	2	0	1	-2.25204	1
Spondin-1	SPON1	0.414868	0.333032	2.6046	3.57877	2	0	1	-2.2339	1
[Pyruvate dehydrogenase (acetyl-transferring)] kinase isozyme 3, mitochondrial	PDK3	-0.876703	0.435308	1.35241	1.81204	2	1	1	-2.20432	1
Interferon regulatory factor 2-binding protein-like	IRF2BPL	-1.14098	0.786187	1.07964	1.44359	2	1	1	-2.18081	1
Myosin regulatory light chain 2, atrial isoform	MYL7	1.02835	1.10249	3.11441	4.82193	2	0	1	-2.15831	1
RNA-binding protein 10	DKFZp686E2459;RBM10	0.164115	0.0767757	2.25198	2.46582	2	0	1	-2.11261	1
Acyl-coenzyme A thioesterase 9, mitochondrial	ACOT9	-0.472074	0.597488	1.63806	1.69	2	1	1	-2.10107	1
mRNA cap guanine-N7 methyltransferase	RNMT	-0.40922	0.135423	1.6771	2.09781	2	1	1	-2.07941	1
Poly(U)-binding-splicing factor PUF60	PUF60	-1.01587	0.920197	1.09828	5.27689	2	1	1	-2.07535	1
Heat shock protein beta-6	HEL55;HSPB6	-3.29609	9.25352	-1.0982	4.16022	3	0	1	-2.03812	1
Four and a half LIM domains protein 1	FHL1	-1.96197	4.47555	0.130469	0.206355	1	1	1	-2.00035	1
Serine--tRNA ligase, mitochondrial	SARS2	1.49105	1.61293	-0.420044	0.874417	1	1	1	2.03351	1
ATP-dependent RNA helicase DDX3X	DDX3X	1.92194	3.78825	-0.0271553	0.103165	1	1	1	2.04987	1
Deoxyuridine 5-triphosphate nucleotidohydrolase, mitochondrial	DUT	0.946942	1.33863	-0.965266	1.32817	3	1	1	2.06465	1
Chloride intracellular channel protein;Chloride intracellular channel protein 5	CLIC5;MST130	0.742373	0.580157	-1.17149	4.12002	2	1	1	2.07767	1
Coronin	CORO6	1.51102	1.78504	-0.444006	1.02576	1	1	1	2.07876	1
NA	ATP5B	-0.315878	0.219329	-2.29235	2.30724	2	0	1	2.202	1
Myosin-13	MYH13	-0.718155	0.313093	-2.74261	4.84966	2	0	1	2.27479	1
Histidine-rich glycoprotein	HRG	3.49762	2.00318	1.25071	4.19154	3	0	1	2.27731	1
Dihydropyrimidinase-related protein 4	DPYSL4	0.159505	0.116961	-1.93165	2.70741	2	1	1	2.29682	1
Diphosphoinositol polyphosphate phosphohydrolase 2	NUDT4	1.53147	1.89214	-0.657714	1.63674	3	1	1	2.32469	1
Hemoglobin subunit beta;LVV-hemorphin-7;Spinorphin	HBB	1.91942	2.41099	-0.293819	1.50846	3	1	1	2.32871	1
ATP synthase subunit beta;ATP synthase subunit beta, mitochondrial	HEL-S-271;ATP5B	-0.171003	0.22151	-2.29235	2.30724	2	0	1	2.34688	1
2-amino-3-ketobutyrate coenzyme A ligase, mitochondrial	GCAT	-0.34918	0.225259	-2.475	1.31635	2	0	1	2.36141	1
Serum amyloid P-component;Serum amyloid P-component(1-203)	HEL-S-92n;APCS	4.09364	3.00585	1.68803	3.32411	3	0	1	2.41192	1
NA	ARVCF	0.847692	1.37644	-1.39351	2.81522	3	1	1	2.41723	1
NA	NPPA	10.9067	18.7016	8.08286	7.81123	3	0	1	2.47791	1
Hemoglobin subunit alpha	HBA2;HBA1	2.08749	1.85329	-0.306342	1.53499	3	1	1	2.50998	1
Homer protein homolog 1	HOMER1	1.24834	0.978327	-1.12166	4.67066	2	1	1	2.53106	1
Inactive tyrosine-protein kinase 7	PTK7	0.777784	0.952173	-1.5791	1.76095	2	1	1	2.54313	1
Retinal dehydrogenase 1	HEL-S-53e;HEL-9;ALDH1A1	3.47381	2.41099	0.959427	4.86835	3	0	1	2.56083	1
Fibrinogen gamma chain	FGG;DKFZp779N0926	3.00573	1.61628	0.49403	1.03153	1	0	1	2.58378	1
Glutathione peroxidase;Glutathione peroxidase 3	GPX3	3.80717	2.04506	1.13986	4.37139	3	0	1	2.70381	1
Apolipoprotein E	APOE	4.17089	4.36917	1.25007	3.81374	3	0	1	2.95125	1
Hexokinase;Hexokinase-2	HK2;DKFZp686M1669	0.692641	0.516621	-2.05196	1.55238	2	1	1	2.9569	1
Four and a half LIM domains protein 2	FHL2;AAG11	-0.843035	1.23549	-3.72195	3.71495	2	0	1	3.18319	1
Complement C4-A;Complement C4 beta chain;Complement C4-A alpha chain;C4a anaphylatoxin;C4b-A;C4d-A;Complement C4 gamma chain	C4A	4.30695	6.03572	1.12671	5.48287	3	0	1	3.21748	1
Vitronectin;Vitronectin V65 subunit;Vitronectin V10 subunit;Somatomedin-B	VTN	4.35377	3.91702	1.13883	3.40412	3	0	1	3.2515	1
Kinase D-interacting substrate of 220 kDa	KIDINS220;DKFZp686H14204	1.20534	1.1696	-2.26221	2.03595	2	1	1	3.69142	1
Perilipin;Perilipin-2	ADFP;PLIN2	1.27149	0.949685	-2.48668	2.35599	2	1	1	3.99441	1
Fibrinogen alpha chain;Fibrinopeptide A;Fibrinogen alpha chain	FGA	5.40086	6.44325	0.947706	2.97462	3	0	1	4.50024	1
Fibulin-2	FBLN2;DKFZp586A1519	7.20223	13.5728	2.51702	7.4567	3	0	1	4.64587	1
Ig gamma-2 chain C region	DKFZp686I04196;IGHG2;DKFZp686C15213;DKFZp686E23209	5.99814	3.04163	0.371449	0.7732	1	0	1	5.70552	1
CD166 antigen	ALCAM	0.226573	0.163967	2.19487	2.46902	2	0	0	-1.9899	0
Fatty acid synthase;[Acyl-carrier-protein] S-acetyltransferase;[Acyl-carrier-protein] S-malonyltransferase;3-oxoacyl-[acyl-carrier-protein] synthase;3-oxoacyl-[acyl-carrier-protein] reductase;3-hydroxyacyl-[acyl-carrier-protein] dehydratase;Enoyl-[acyl-carrier-protein] reductase;Oleoyl-[acyl-carrier-protein] hydrolase	FASN	0.313768	0.177547	2.26162	2.00082	2	0	0	-1.97312	0
Leiomodin-1	LMOD1	0.337242	0.323432	2.24992	3.15813	2	0	0	-1.9373	0
Ferritin;Ferritin heavy chain;Ferritin heavy chain, N-terminally processed	FTH1	-1.51346	1.32849	0.495106	1.06849	1	1	0	-1.93655	0
Myelin expression factor 2	MYEF2	-0.250782	0.179754	1.69067	1.5308	2	1	0	-1.93528	0
SNW domain-containing protein 1	SNW1	-0.0619689	0.0243764	1.84759	1.84621	2	1	0	-1.91203	0
NA	NCAM1	-0.888502	0.569319	1.05368	4.53202	2	1	0	-1.90093	0
Microtubule-associated protein RP/EB family member 2	MAPRE2	-1.42436	1.55274	0.540489	1.87153	3	1	0	-1.89534	0
Receptor protein-tyrosine kinase;Receptor tyrosine-protein kinase erbB-2	ERBB2	0.18479	0.162475	2.02832	2.80192	2	0	0	-1.85596	0
NA	MXRA7	-0.0638255	0.0432261	1.7859	1.70793	2	1	0	-1.8488	0
Adipocyte enhancer-binding protein 1	AEBP1	0.269239	0.166526	2.07989	5.05536	2	0	0	-1.82592	0
AP-2 complex subunit sigma	AP2S1	-0.201927	0.0618068	1.62137	1.60166	2	1	0	-1.81332	0
Myomesin-3	MYOM3	-2.62862	1.46623	-0.679359	5.69678	3	0	0	-1.81256	0
Zinc transporter SLC39A7	SLC39A7	-0.92997	0.267428	0.924983	1.91243	2	1	0	-1.80661	0
Nephronectin	NPNT	0.41697	0.280633	2.18669	1.56584	2	0	0	-1.79087	0
Peripheral plasma membrane protein CASK	CASK	0.550543	0.32265	2.30653	3.97602	2	0	0	-1.78373	0
Cyclin-dependent kinase 9	CDK9	-0.0326862	0.0183539	1.73699	2.37781	2	1	0	-1.76606	0
Neuroplastin	DKFZp566H1924;NPTN	-0.134724	0.0790106	1.63793	1.77476	2	1	0	-1.76358	0
Methionine-R-sulfoxide reductase B3	MSRB3	-0.502426	0.152413	1.27279	3.7722	2	1	0	-1.74603	0
Kinesin-like protein KIF13A	KIF13A	-0.229665	0.176052	1.50334	3.4776	2	1	0	-1.71651	0
Tubulin alpha-4A chain	TUBA4A	-2.21247	4.3658	-0.404733	1.81412	3	0	0	-1.68616	0
Brain acid soluble protein 1	BASP1	-0.393591	0.233758	1.31721	1.70729	2	1	0	-1.68406	0
High mobility group protein HMGI-C	HMGA2	-0.108976	0.161706	1.58503	1.38093	2	1	0	-1.68202	0
Translocation protein SEC63 homolog	SEC63	-0.34625	0.305005	1.35969	3.71634	2	1	0	-1.68155	0
Nodal modulator 1	NOMO1	0.240942	0.138823	1.90885	2.7257	2	0	0	-1.67375	0
Band 4.1-like protein 3;Band 4.1-like protein 3, N-terminally processed	EPB41L3	-0.287994	0.241189	1.40498	4.25549	2	1	0	-1.67107	0
H/ACA ribonucleoprotein complex subunit 4	DKC1	-0.203625	0.0937609	1.41564	1.42011	2	1	0	-1.59794	0
Tubulin alpha-8 chain	TUBA8;DKFZp686L04275	-2.27507	0.702568	-0.57458	1.91721	2	0	0	-1.56956	0
Collagen alpha-1(XII) chain	COL12A1	0.216787	0.240096	1.77341	3.54658	2	0	0	-1.55501	0
Golgin subfamily A member 3	GOLGA3	0.0607108	0.0267086	1.61214	3.54164	2	0	0	-1.54093	0
DNA mismatch repair protein Msh2	MSH2	0.0675954	0.0262682	1.60092	1.50408	2	0	0	-1.52221	0
Tropomyosin alpha-3 chain	TPM3;HEL-S-82p	-0.692415	0.363002	0.876712	2.94701	2	1	0	-1.51813	0
Structural maintenance of chromosomes flexible hinge domain-containing protein 1	SMCHD1	-0.0283684	0.0111741	1.49909	1.41719	2	1	0	-1.51074	0
Mitochondrial carrier homolog 2	MTCH2	0.402917	0.388881	1.9026	2.62774	2	0	0	-1.50519	0
Plexin-A3	PLXNA3	0.26782	0.104758	1.7744	3.38478	2	0	0	-1.50503	0
Insulin-like growth factor-binding protein 5	IGFBP5	0.925851	0.724689	2.37997	1.84278	2	0	0	-1.48591	0
Calsequestrin-2;Calsequestrin	CASQ2	-1.62715	1.90145	-0.0446578	0.0805441	1	0	0	-1.48075	0
Guanine nucleotide-binding protein G(o) subunit alpha	GNAO1	0.706741	0.320208	2.13871	5.16251	2	0	0	-1.45047	0
CD109 antigen	CD109	0.623351	0.460165	2.05257	6.6902	2	0	0	-1.44298	0
NA	MATN2	1.13833	2.08407	2.53073	4.74671	3	0	0	-1.4325	0
Lysophospholipid acyltransferase 7	MBOAT7	-0.224552	0.18502	1.23181	2.39637	2	1	0	-1.42493	0
Serine/threonine-protein kinase 26;Serine/threonine-protein kinase 25	STK26;MST4;STK25;DKFZp686J1430	-0.551169	0.26509	0.912059	1.41849	2	1	0	-1.41418	0
Pre-mRNA-processing factor 6	PRPF6	-0.230222	0.114892	1.20479	1.31951	2	1	0	-1.40208	0
Transcriptional coactivator YAP1	YAP1;DKFZp451O0517	0.200299	0.134984	1.60507	1.68679	2	0	0	-1.39389	0
Microtubule-associated protein 1B;MAP1B heavy chain;MAP1 light chain LC1	MAP1B;DKFZp686F1345	0.337491	0.234898	1.73166	10.3725	2	0	0	-1.39025	0
Phosphoenolpyruvate carboxykinase [GTP], mitochondrial	PCK2	0.364573	0.41599	1.75599	1.99458	2	0	0	-1.38885	0
Sushi repeat-containing protein SRPX	SRPX;HEL-S-83p	2.35805	4.67066	3.63955	4.27149	3	0	0	-1.38266	0
Mitochondrial import inner membrane translocase subunit Tim9	TIMM9	-0.327251	0.350239	1.08855	3.05312	2	1	0	-1.37647	0
Carnitine O-palmitoyltransferase 1, muscle isoform	CPT1B;hCG_2044796	-1.9415	1.11209	-0.441854	2.13302	2	0	0	-1.37603	0
Amine oxidase [flavin-containing] A	MAOA	-1.0609	0.421352	0.385205	2.12555	2	1	0	-1.36803	0
Ketimine reductase mu-crystallin	CRYM	-1.91188	1.59122	-0.437437	1.15205	1	0	0	-1.35107	0
Filamin-C	FLNC	-2.16832	14.113	-0.681648	0.975381	1	0	0	-1.34984	0
Acyl-coenzyme A oxidase;Peroxisomal acyl-coenzyme A oxidase 3	ACOX3	0.339453	0.28484	1.66932	6.89883	2	0	0	-1.32252	0
Calponin;Calponin-1	HEL-S-14;CNN1	-0.174276	0.0559476	1.18019	2.44626	2	1	0	-1.32018	0
Long-chain-fatty-acid--CoA ligase 1	ACSL1	-1.57711	5.79414	-0.15463	0.283073	1	0	0	-1.31468	0
Epidermal growth factor receptor substrate 15-like 1	EPS15L1	-0.649207	0.383096	0.711864	3.52313	2	1	0	-1.30099	0
NA	SLMAP	-1.04598	2.46831	0.329155	0.173629	1	1	0	-1.29398	0
RNA-binding protein 25	RBM25	-0.0369341	0.0287732	1.27589	2.94835	2	1	0	-1.28381	0
Transmembrane protein 201	TMEM201	-0.0180024	0.00413291	1.29206	1.59118	2	1	0	-1.28194	0
Sarcalumenin	SRL	-1.79631	2.93027	-0.428724	3.36751	3	0	0	-1.24469	0
Heat shock protein beta-7	HSPB7;DKFZp779D0968;DKFZp686A14192	-1.60254	6.28939	-0.250993	0.213223	1	0	0	-1.23844	0
Matrix-remodeling-associated protein 7	MXRA7	0.552056	0.421098	1.7859	1.70793	2	0	0	-1.23291	0
Nicotinate-nucleotide pyrophosphorylase [carboxylating]	HEL-S-90n;QPRT	0.710239	0.782056	1.93411	3.416	2	0	0	-1.23111	0
Minor histocompatibility antigen H13	HM13	-0.310358	0.135113	0.966489	2.78588	2	1	0	-1.23079	0
Inorganic pyrophosphatase 2, mitochondrial	PPA2	0.428948	0.367117	1.66455	2.28517	2	0	0	-1.228	0
Dynein light chain roadblock-type 1;Dynein light chain roadblock-type 2	DYNLRB1;DYNLRB2	-0.564233	0.606285	0.719244	2.39439	2	1	0	-1.22381	0
Pre-B-cell leukemia transcription factor-interacting protein 1	PBXIP1	-0.259987	0.0974955	1.00472	3.12709	2	1	0	-1.22076	0
Tenascin-X	TNXB	0.361544	0.170468	1.58831	6.75666	2	0	0	-1.21496	0
Cysteine-rich protein 2	CRIP2	-0.29761	0.105666	0.936058	2.55254	2	1	0	-1.18594	0
Histone H1.5	HIST1H1B	-0.313331	0.354209	0.913884	1.77907	2	1	0	-1.17826	0
Pogo transposable element with ZNF domain	POGZ	0.660636	0.775519	1.82829	1.62659	2	0	0	-1.16906	0
Signal recognition particle subunit SRP72	SRP72;HEL103	0.36048	0.218807	1.54336	1.77183	2	0	0	-1.1686	0
FERM, RhoGEF and pleckstrin domain-containing protein 1	FARP1	0.48463	0.486183	1.65877	4.73494	2	0	0	-1.16621	0
Caldesmon	CALD1	-0.574772	0.178147	0.650557	2.59657	2	1	0	-1.16188	0
Versican core protein	CSPG2;VCAN	1.43868	2.31522	2.54653	7.43993	3	0	0	-1.14881	0
Nuclear cap-binding protein subunit 1	NCBP1	0.255776	0.298418	1.42367	1.52481	2	0	0	-1.14702	0
Vitamin K-dependent protein S	PROS1	0.212913	0.0973585	1.38292	4.43505	2	0	0	-1.14689	0
Tyrosine-protein phosphatase non-receptor type substrate 1;Signal-regulatory protein beta-1 isoform 3	SIRPA;PTPNS1;SIRPB1	0.495874	0.55532	1.64724	2.61824	2	0	0	-1.14281	0
Extended synaptotagmin-2	ESYT2	-0.645119	0.477462	0.544447	1.74326	2	1	0	-1.12027	0
UDP-glucose 6-dehydrogenase	UGDH	0.565657	0.447618	1.68895	3.73271	2	0	0	-1.11703	0
5-AMP-activated protein kinase subunit gamma-2	PRKAG2	-0.191909	0.122661	0.961432	3.59566	2	1	0	-1.10701	0
Very-long-chain enoyl-CoA reductase	TECR	-0.173687	0.0544351	0.951751	5.27843	2	1	0	-1.07857	0
RNA-binding protein FUS	FUS	0.0060644	0.0025626	1.11972	1.42282	2	0	0	-1.07604	0
Ran GTPase-activating protein 1	RANGAP1	0.317139	0.192143	1.40154	2.77403	2	0	0	-1.06231	0
Nuclear pore membrane glycoprotein 210	NUP210	-0.1058	0.0431765	0.999313	1.30784	2	1	0	-1.06087	0
Exocyst complex component 8	EXOC8	0.190489	0.13636	1.26591	2.03185	2	0	0	-1.04585	0
Peptidyl-glycine alpha-amidating monooxygenase;Peptidylglycine alpha-hydroxylating monooxygenase;Peptidyl-alpha-hydroxyglycine alpha-amidating lyase	PAM	2.92887	6.88614	3.85588	9.8887	3	0	0	-1.04008	0
Exocyst complex component 4	EXOC4	-0.026648	0.017222	1.0467	3.89721	2	1	0	-1.03171	0
ADP-sugar pyrophosphatase	NUDT5	0.181777	0.152413	1.23817	1.91769	2	0	0	-1.02531	0
WD40 repeat-containing protein SMU1;WD40 repeat-containing protein SMU1, N-terminally processed	SMU1	-0.122939	0.0880054	0.946492	2.58361	2	1	0	-1.02228	0
Protein lin-7 homolog C	LIN7C	0.328509	0.140489	1.36436	1.64318	2	0	0	-1.01171	0
Reticulon-4	RTN4	1.1355	0.770601	2.12552	10.1634	2	0	0	-1.0078	0
Pinin	PNN	0.552112	0.477462	1.57247	2.51513	2	0	0	-1.00768	0
Tubulointerstitial nephritis antigen-like	TINAGL1	-1.74393	1.52945	-0.613169	1.90528	3	0	0	-0.997706	0
Myosin-11	MYH11	0.261079	0.106441	1.28374	3.86182	2	0	0	-0.994079	0
Apolipoprotein C-III	APOC3	1.23113	0.234379	2.19169	2.99605	2	0	0	-0.981981	0
Wolframin	WFS1	-0.442871	0.164104	0.60188	2.64432	2	1	0	-0.978617	0
FAS-associated factor 2	FAF2	0.0720755	0.0311185	1.08672	3.10472	2	0	0	-0.975216	0
NADH dehydrogenase [ubiquinone] 1 alpha subcomplex subunit 6	NDUFA6	-1.51596	2.40838	-0.422123	2.2089	3	0	0	-0.971304	0
Myosin-6	MYH6	2.69591	6.3009	3.56988	6.56171	3	0	0	-0.971292	0
Fragile X mental retardation protein 1	FMR1	0.596911	0.300185	1.57947	1.78907	2	0	0	-0.970265	0
DnaJ homolog subfamily C member 3	DNAJC3	-0.294529	0.105666	0.728287	2.96169	2	1	0	-0.963643	0
N(G),N(G)-dimethylarginine dimethylaminohydrolase 1	DDAH1	0.102997	0.0576929	1.09634	4.24353	2	0	0	-0.954441	0
Protein transport protein Sec61 subunit alpha isoform 1	SEC61A1;SEC61A2	-0.376163	0.24874	0.632399	1.52812	2	1	0	-0.944109	0
Collagen alpha-1(III) chain	COL3A1	0.999294	0.959888	1.92964	7.47904	2	0	0	-0.937335	0
Surfeit locus protein 4	SURF4	-0.206956	0.112702	0.785606	2.3648	2	1	0	-0.936546	0
Guanine nucleotide-binding protein G(I)/G(S)/G(O) subunit gamma-12;Guanine nucleotide-binding protein subunit gamma	GNG12	-0.447839	0.38153	0.55725	1.377	2	1	0	-0.936497	0
Centromere protein V	CENPV	0.692298	0.46819	1.63442	2.13385	2	0	0	-0.932856	0
Zyxin	ZYX	-0.434991	0.206796	0.542232	1.33389	2	1	0	-0.907804	0
Very-long-chain (3R)-3-hydroxyacyl-CoA dehydratase 3	HACD3	-0.122983	0.0686199	0.823749	1.69518	2	1	0	-0.892818	0
Transmembrane protein 43	TMEM43;FLJ00144	0.238335	0.0880054	1.16194	4.5515	2	0	0	-0.888313	0
Troponin I, cardiac muscle	TNNI3	-1.67857	2.29418	-0.657249	4.04623	3	0	0	-0.885846	0
Myeloid-derived growth factor	MYDGF	-0.139095	0.0383993	0.796956	2.37811	2	1	0	-0.88066	0
Protein S100-A4	S100A4	0.255754	0.0790106	1.15366	3.45385	2	0	0	-0.862164	0
Serine/threonine-protein kinase WNK1	WNK1	0.377268	0.2319	1.26772	2.81564	2	0	0	-0.860991	0
Tumor suppressor p53-binding protein 1	TP53BP1	0.607782	0.462885	1.48612	1.73176	2	0	0	-0.860907	0
Serum paraoxonase/arylesterase 2	PON2	0.0110205	0.00413291	0.919732	2.65664	2	0	0	-0.860083	0
5(3)-deoxyribonucleotidase, cytosolic type	HEL74;NT5C	0.299439	0.112702	1.18872	4.85231	2	0	0	-0.85547	0
Prolyl 4-hydroxylase subunit alpha-2	P4HA2;DKFZp686M0919	0.647298	0.58075	1.51211	1.91033	2	0	0	-0.848806	0
BUB3-interacting and GLEBS motif-containing protein ZNF207	ZNF207	0.349679	0.144657	1.21977	1.91155	2	0	0	-0.837992	0
Transcriptional activator protein Pur-alpha	PURA	-0.590254	0.391092	0.327733	1.32219	2	1	0	-0.836754	0
Laminin subunit alpha-2	LAMA2	-1.08886	3.67347	-0.149708	1.02867	1	0	0	-0.83162	0
Thiosulfate sulfurtransferase/rhodanese-like domain-containing protein 1	TSTD1	0.804532	1.09161	1.6438	5.54599	2	0	0	-0.830521	0
Eukaryotic translation initiation factor 3 subunit E	EIF3E	-0.448106	0.224663	0.451487	1.31234	2	1	0	-0.825176	0
3-hydroxybutyrate dehydrogenase type 2	BDH2	0.183271	0.163967	1.04828	1.98186	2	0	0	-0.823465	0
IST1 homolog	IST1	-0.393361	0.427888	0.501478	1.60434	2	1	0	-0.823176	0
Serrate RNA effector molecule homolog	SRRT	-0.181472	0.124594	0.696083	1.70677	2	1	0	-0.816609	0
PC4 and SFRS1-interacting protein	PSIP1	0.140062	0.0440984	0.991901	1.76212	2	0	0	-0.807186	0
Putative elongation factor 1-alpha-like 3;Elongation factor 1-alpha;Elongation factor 1-alpha 1	EEF1A1P5;EEF1A1;EEF1A1L14;PTI-1	0.487656	1.70822	1.31287	6.66866	3	0	0	-0.798234	0
Prostaglandin F2 receptor negative regulator	PTGFRN	1.01106	1.82913	1.80865	7.70128	3	0	0	-0.797925	0
Nucleolar transcription factor 1	UBTF	0.502995	0.250691	1.32155	1.98304	2	0	0	-0.79206	0
Microtubule-associated protein 1S;MAP1S heavy chain;MAP1S light chain	MAP1S	0.50224	0.442564	1.31378	2.54548	2	0	0	-0.78461	0
Ubiquilin-2	UBQLN2	-0.024091	0.00606796	0.812934	4.29578	2	1	0	-0.782515	0
U1 small nuclear ribonucleoprotein A	SNRPA	-0.143465	0.0607296	0.694997	1.62309	2	1	0	-0.777457	0
Serpin B6	SERPINB6	0.383217	0.632102	1.19309	1.93921	2	0	0	-0.776305	0
B-cell receptor-associated protein 31	BCAP31	-0.18373	0.0877594	0.653798	2.04545	2	1	0	-0.774254	0
Dolichyl-diphosphooligosaccharide--protein glycosyltransferase subunit STT3A	hCG_2032701;STT3A	-0.274391	0.103503	0.567766	2.11285	2	1	0	-0.774144	0
Arfaptin-1	ARFIP1	0.0655393	0.0262682	0.877771	2.34722	2	0	0	-0.761293	0
Drebrin	DBN1	0.443543	0.322552	1.2351	3.62011	2	0	0	-0.760293	0
Putative oxidoreductase GLYR1	GLYR1;N-PAC	0.296108	0.216946	1.09018	2.02316	2	0	0	-0.754827	0
Exocyst complex component 2	EXOC2	0.192221	0.117511	0.98909	3.16293	2	0	0	-0.75206	0
NA	COL1A1	1.16909	1.793	1.90003	6.59569	3	0	0	-0.736307	0
Myotrophin	DKFZp761E1322;MTPN	-0.35442	0.159963	0.452831	1.90881	2	1	0	-0.732908	0
RNA-binding protein 39	DKFZp781C0423;RBM39;DKFZp686A11192;RNPC2;DKFZp781I1140;DKFZp686C17209	-0.00489031	0.0024478	0.779423	3.81414	2	1	0	-0.727957	0
Alpha-2-macroglobulin receptor-associated protein	LRPAP1	-0.421665	0.26111	0.368444	1.60178	2	1	0	-0.711119	0
Nuclear receptor-binding protein	NRBP1	0.39324	0.227588	1.1328	3.48832	2	0	0	-0.702664	0
Alpha-1,4 glucan phosphorylase;Glycogen phosphorylase, liver form	PYGL	0.757564	2.0821	1.47172	2.44061	3	0	0	-0.695933	0
DNA repair protein RAD50	RAD50	0.900052	0.929993	1.60469	2.84918	2	0	0	-0.693734	0
Xin actin-binding repeat-containing protein 1	XIRP1	-0.737926	1.96764	0.0501014	0.12537	1	1	0	-0.691504	0
GTP-binding protein Rheb	RHEB	0.0119072	0.00291679	0.758559	2.40513	2	0	0	-0.689147	0
Drebrin-like protein	DBNL	-0.350593	0.219532	0.413276	1.42382	2	1	0	-0.687348	0
60S ribosomal protein L13a	RPL13A;RPL13a	0.1109	0.0991702	0.848606	3.42216	2	0	0	-0.68516	0
Eukaryotic translation initiation factor 5B	EIF5B	-0.37714	0.16253	0.384144	1.43114	2	1	0	-0.683158	0
Protein disulfide-isomerase A4	ERP70;PDIA4	0.119216	0.046615	0.853118	4.72427	2	0	0	-0.681605	0
Collagen alpha-1(XIV) chain	COL14A1	2.33985	4.3658	2.95323	8.19185	3	0	0	-0.67674	0
AP-2 complex subunit alpha-2	AP2A2	0.252831	0.172358	0.970955	4.40718	2	0	0	-0.672316	0
Nucleoprotein TPR	TPR	-0.203373	0.122661	0.53344	1.96573	2	1	0	-0.66691	0
Serine/arginine-rich splicing factor 2	SRSF2;SFRS2	0.398048	0.442465	1.09896	5.05349	2	0	0	-0.662159	0
Septin-5	SEPT5;CDCrel-1	0.0852074	0.0495132	0.800585	2.04641	2	0	0	-0.660187	0
Nucleoporin Nup43	NUP43	0.257856	0.149016	0.95912	1.482	2	0	0	-0.654805	0
Natriuretic peptides A;Atrial natriuretic factor	NPPA	7.78263	10.9807	8.08286	7.81123	3	0	0	-0.64611	0
D-3-phosphoglycerate dehydrogenase	PHGDH;HEL-S-113;PGDH3	0.754162	1.21185	1.42123	3.13596	2	0	0	-0.646063	0
Myoferlin	MYOF	-0.172986	0.0969857	0.540503	1.5063	2	1	0	-0.643975	0
NA	SORBS2	-2.2806	9.11929	-1.45857	1.34113	3	0	0	-0.642412	0
2,3-cyclic-nucleotide 3-phosphodiesterase	CNP	0.206821	0.144657	0.890818	4.90675	2	0	0	-0.633776	0
DnaJ homolog subfamily A member 1	DNAJA1;HDJ2	-0.108622	0.0495132	0.589904	2.16432	2	1	0	-0.631732	0
Bcl-2-associated transcription factor 1	BCLAF1	0.20691	0.0760249	0.887581	1.70069	2	0	0	-0.630272	0
Arginyl-tRNA--protein transferase 1	ATE1	0.0901013	0.046615	0.776211	2.33137	2	0	0	-0.629577	0
High mobility group protein B2	HMGB2	0.597872	1.1232	1.25549	2.92129	2	0	0	-0.62748	0
Nucleosome assembly protein 1-like 1	NAP1L1	0.278399	0.148379	0.949515	2.8714	2	0	0	-0.624128	0
Sorting nexin-2	SNX2	-0.271249	0.106441	0.428323	1.54573	2	1	0	-0.623879	0
Biglycan	BGN	1.6979	1.75985	2.29286	5.406	3	0	0	-0.621949	0
Stress-induced-phosphoprotein 1	HEL-S-94n;STIP1	0.0699952	0.0495132	0.747636	4.72721	2	0	0	-0.619534	0
ADP-ribosylation factor-like protein 1	ARL1	0.205372	0.332071	0.869077	2.02145	2	0	0	-0.612287	0
Signal peptidase complex subunit 2	SPCS2	0.138195	0.0544351	0.804715	3.06343	2	0	0	-0.611558	0
Thymosin beta-4;Hematopoietic system regulatory peptide	TMSB4X	0.239537	0.0902234	0.898027	2.44121	2	0	0	-0.608666	0
Ubiquinone biosynthesis protein COQ9, mitochondrial	hCG_2025883;COQ9	-1.09853	1.01683	-0.376161	1.49347	2	0	0	-0.602369	0
Manganese-transporting ATPase 13A1	ATP13A1	0.299351	0.212	0.946251	1.65857	2	0	0	-0.599733	0
Nucleoporin p54	NUP54	-0.0624494	0.032879	0.599225	1.49942	2	1	0	-0.595394	0
Serine protease HTRA1	HTRA1	0.884034	1.34767	1.49007	1.19059	1	0	0	-0.588821	0
NADH dehydrogenase [ubiquinone] iron-sulfur protein 4, mitochondrial	NDUFS4	-1.03458	1.63972	-0.328817	1.57314	3	0	0	-0.588373	0
WD repeat-containing protein 5	WDR5	0.241488	0.0924204	0.876112	1.43959	2	0	0	-0.583593	0
Serine/threonine-protein phosphatase 2A 56 kDa regulatory subunit alpha isoform	PPP2R5A	0.104182	0.0599921	0.739492	2.38013	2	0	0	-0.576755	0
SWI/SNF complex subunit SMARCC2	SMARCC2	0.397246	0.352057	1.00247	1.90585	2	0	0	-0.561153	0
FYVE and coiled-coil domain-containing protein 1	FYCO1	0.0446682	0.0198322	0.663667	2.7481	2	0	0	-0.556268	0
Leucine-rich repeat-containing protein 59	LRRC59	0.0436893	0.0200263	0.658802	1.96506	2	0	0	-0.552114	0
Heterogeneous nuclear ribonucleoprotein F;Heterogeneous nuclear ribonucleoprotein F, N-terminally processed	HNRPF;HNRNPF	0.311111	0.481611	0.911999	1.69726	2	0	0	-0.551833	0
Protein prune homolog	PRUNE	-0.369546	0.149016	0.262292	1.59264	2	1	0	-0.547001	0
Septin-7	SEPT7;Nbla02942;DKFZp686F17268	0.146918	0.0950209	0.746596	4.40098	2	0	0	-0.541514	0
Beta-2-microglobulin;Beta-2-microglobulin;Beta-2-microglobulin form pI 5.3	B2M	0.367065	0.207393	0.954695	3.50975	2	0	0	-0.540928	0
Protein scribble homolog	SCRIB	0.0987834	0.0473877	0.70018	1.44801	2	0	0	-0.540676	0
N-alpha-acetyltransferase 15, NatA auxiliary subunit	NAA15;NARG1	-0.151279	0.061083	0.462527	1.61636	2	1	0	-0.539997	0
Nucleobindin-2;Nesfatin-1	NUCB2;HEL-S-109;Nucb2	0.202	0.0790106	0.796534	2.87665	2	0	0	-0.53912	0
CTP synthase;CTP synthase 2	CTPS2	0.209896	0.0790106	0.80267	1.66824	2	0	0	-0.537698	0
Ribosome-binding protein 1	RRBP1	0.270018	0.13638	0.858143	2.35833	2	0	0	-0.536105	0
Golgin subfamily B member 1	GOLGB1	0.499011	0.216124	1.07379	1.62883	2	0	0	-0.534632	0
GTP-binding protein RAD	RRAD	-0.0185082	0.00696083	0.578375	2.03261	2	1	0	-0.529455	0
Calcium-transporting ATPase	ATP2B4;DKFZp686M088	0.0714227	0.0311185	0.663479	3.40223	2	0	0	-0.529315	0
Nuclear autoantigenic sperm protein	NASP	0.465305	0.443896	1.03524	3.75612	2	0	0	-0.527668	0
Exportin-1	XPO1	-0.0792881	0.0460958	0.513875	2.27979	2	1	0	-0.522182	0
Cysteine and glycine-rich protein 1	CSRP1;DKFZp686M148	0.635641	0.299854	1.18262	4.38789	2	0	0	-0.512825	0
Mesencephalic astrocyte-derived neurotrophic factor	MANF	0.298482	0.135423	0.856652	3.35653	2	0	0	-0.506068	0
E3 ubiquitin-protein ligase MARCH5	"MARCH5"	0.361681	0.308671	0.915275	3.4212	2	0	0	-0.50472	0
Potassium/sodium hyperpolarization-activated cyclic nucleotide-gated channel 4	HCN4	0.38177	0.180236	0.933822	1.37406	2	0	0	-0.504199	0
Tropomyosin alpha-4 chain	HEL-S-108;TPM4	0.447153	0.174486	0.991817	2.34016	2	0	0	-0.500005	0
CUGBP Elav-like family member 2	CELF2	0.155539	0.0483134	0.714385	1.68447	2	0	0	-0.498908	0
Myosin-1	HEL71;MYH1	-1.29179	0.798452	-0.661462	1.61393	2	0	0	-0.494621	0
WD repeat-containing protein 37	WDR37	0.272549	0.213789	0.820097	3.82262	2	0	0	-0.493432	0
Signal recognition particle 14 kDa protein	SRP14	0.388748	0.438417	0.925377	3.61745	2	0	0	-0.488312	0
Lamin-B2	LMNB2	0.270173	0.471308	0.811432	5.02378	2	0	0	-0.486666	0
Acetyl-CoA acetyltransferase, cytosolic	ACAT2	0.455257	0.265552	0.985439	1.45382	2	0	0	-0.485172	0
SWI/SNF-related matrix-associated actin-dependent regulator of chromatin subfamily E member 1	SMARCE1	0.255612	0.0849085	0.79336	1.47678	2	0	0	-0.482159	0
40S ribosomal protein S11	RPS11	-0.0975027	0.103542	0.457786	1.98004	2	1	0	-0.481219	0
Nuclear pore complex protein Nup205	NUP205	0.900743	1.03373	1.40235	2.57722	2	0	0	-0.479562	0
Procollagen-lysine,2-oxoglutarate 5-dioxygenase 1	PLOD1	0.484728	0.375964	1.00508	2.59119	2	0	0	-0.476423	0
Vesicle-fusing ATPase	NSF	0.125372	0.0756908	0.664007	3.41279	2	0	0	-0.475922	0
Guanylate kinase	GUK1;DKFZp666D023	0.0196836	0.00650895	0.557964	3.18456	2	0	0	-0.469727	0
V-type proton ATPase subunit a;V-type proton ATPase 116 kDa subunit a isoform 1	ATP6V0A1;DKFZp686N0561	0.511535	0.345243	1.02345	3.18979	2	0	0	-0.468996	0
Double-strand-break repair protein rad21 homolog	RAD21	0.621242	0.480922	1.12581	1.35068	2	0	0	-0.467291	0
Cell adhesion molecule 1	CADM1	0.772163	0.793471	1.26239	2.06722	2	0	0	-0.46047	0
Fibronectin;Anastellin;Ugl-Y1;Ugl-Y2;Ugl-Y3	FN1;DKFZp686O12165;DKFZp686L11144;DKFZp686O13149	1.21962	3.21883	1.67475	6.7335	3	0	0	-0.448084	0
Prolargin	PRELP;MST161	1.68518	0.881755	2.11577	6.10481	2	0	0	-0.447834	0
Thrombospondin-1	THBS1	0.654268	1.07383	1.13833	2.73904	2	0	0	-0.447477	0
Malectin	MLEC	0.176249	0.112702	0.68061	2.72165	2	0	0	-0.442563	0
AP-3 complex subunit beta-1;AP-3 complex subunit beta	AP3B1	0.625714	0.786187	1.10634	4.94981	2	0	0	-0.44228	0
Small nuclear ribonucleoprotein Sm D1	SNRPD1	0.188909	0.236716	0.687069	1.48625	2	0	0	-0.436717	0
Kelch-like protein 41	KLHL41;SARCOSIN	0.160682	0.0849853	0.658072	2.16089	2	0	0	-0.434351	0
Lactadherin;Lactadherin short form;Medin	MFGE8	0.228808	0.208179	0.722073	2.48315	2	0	0	-0.433751	0
Protein SCO1 homolog, mitochondrial	SCO1	-1.12475	0.965574	-0.560928	2.19639	2	0	0	-0.433649	0
Melanoma-associated antigen D2	MAGED2	0.513105	0.39799	0.991076	6.5121	2	0	0	-0.433271	0
Transgelin	TAGLN	1.46425	1.84237	1.88733	6.19607	3	0	0	-0.427736	0
Fascin	FSCN1	0.252555	0.218807	0.738525	3.34203	2	0	0	-0.427362	0
Actin-related protein 2/3 complex subunit 3	ARPC3	-0.0196815	0.00606796	0.47149	1.57003	2	1	0	-0.417857	0
Eukaryotic translation initiation factor 3 subunit H	EIF3S3;EIF3H	-0.00669912	0.0024478	0.477604	1.67089	2	1	0	-0.411324	0
Cullin-1	CUL1	0.0841937	0.0503585	0.563375	2.45509	2	0	0	-0.410927	0
Dystroglycan;Alpha-dystroglycan;Beta-dystroglycan	DAG1	0.0250737	0.0234005	0.503904	2.92254	2	0	0	-0.407301	0
Pre-mRNA-processing factor 19	PRPF19	0.214293	0.225579	0.678807	1.90975	2	0	0	-0.402617	0
Protein S100;Protein S100-A6	S100A6	0.139492	0.0973662	0.607027	2.14963	2	0	0	-0.401685	0
Major vault protein	MVP	0.744649	1.05109	1.17863	5.08575	2	0	0	-0.399606	0
PDZ and LIM domain protein 5	PDLIM5;LIM	-0.69254	0.974337	-0.184969	1.3376	2	0	0	-0.398101	0
Splicing factor 3B subunit 3	SF3B3	-0.053683	0.0289528	0.417878	1.69741	2	1	0	-0.395293	0
Peroxiredoxin-1	PRDX1	1.4613	9.39518	1.84898	9.91995	3	0	0	-0.390228	0
Golgi apparatus protein 1	GLG1	0.345901	0.277295	0.791234	2.08668	2	0	0	-0.389628	0
Tropomyosin alpha-1 chain	TPM1	-0.899905	1.50127	-0.392513	1.23202	1	0	0	-0.386492	0
Alpha-actinin-1	ACTN1	0.931833	1.23535	1.34237	6.48732	2	0	0	-0.385186	0
Protein PBDC1	PBDC1	0.205427	0.170352	0.643087	1.34477	2	0	0	-0.373795	0
Obscurin	OBSCN	-0.00956902	0.00450844	0.438167	3.45005	2	1	0	-0.372585	0
Dihydrolipoyllysine-residue succinyltransferase component of 2-oxoglutarate dehydrogenase complex, mitochondrial	DLST	-0.975356	1.78504	-0.477617	2.72351	3	0	0	-0.372152	0
Neural cell adhesion molecule 1	NCAM1	0.645844	0.724582	1.05368	4.53202	2	0	0	-0.366584	0
RNA-binding motif protein, X chromosome;RNA-binding motif protein, X chromosome, N-terminally processed	RBMX	0.27172	0.427888	0.698076	2.1068	2	0	0	-0.36552	0
Tubulin gamma-1 chain;Tubulin gamma-2 chain;Tubulin gamma chain	TUBG1;TUBG2	0.218829	0.135423	0.640481	1.7164	2	0	0	-0.357644	0
Nesprin-2	SYNE2	0.750628	0.591564	1.14289	3.26292	2	0	0	-0.355926	0
DnaJ homolog subfamily B member 11	DNAJB11	0.545384	0.578469	0.945623	4.03	2	0	0	-0.353037	0
14-3-3 protein beta/alpha;14-3-3 protein beta/alpha, N-terminally processed	HEL-S-1;YWHAB	0.305584	0.214894	0.715924	3.50235	2	0	0	-0.350487	0
Alpha-actinin-4	ACTN4	0.128329	0.0633533	0.547079	3.04134	2	0	0	-0.349598	0
Thioredoxin-related transmembrane protein 4	TMX4	0.122857	0.0429032	0.539299	1.4956	2	0	0	-0.346862	0
Tubulin alpha-1A chain;Tubulin alpha-3C/D chain;Tubulin alpha-3E chain	TUBA1A;TUBA2;TUBA3C;TUBA3E	-0.248831	0.217804	0.185733	2.12709	2	1	0	-0.34551	0
Regulation of nuclear pre-mRNA domain-containing protein 1B	RPRD1B	0.568015	0.473295	0.954544	1.5725	2	0	0	-0.339818	0
40S ribosomal protein S26;Putative 40S ribosomal protein S26-like 1	RPS26;RPS26P11	0.169421	0.11939	0.576414	1.68411	2	0	0	-0.339457	0
Heat shock protein beta-1	HEL-S-102;HSPB1	-0.200331	0.362492	0.221762	1.74196	2	1	0	-0.335024	0
Myosin-3	MYH3	-0.959138	1.08014	-0.499929	1.52863	2	0	0	-0.332393	0
Protein disulfide-isomerase	P4HB	-0.147108	0.208179	0.264946	1.49846	2	1	0	-0.327362	0
Pre-mRNA-splicing factor ATP-dependent RNA helicase DHX15	DHX15	0.152255	0.115668	0.548089	2.12514	2	0	0	-0.326738	0
Torsin-1A-interacting protein 1	TOR1AIP1	0.692771	0.230113	1.05326	3.50667	2	0	0	-0.319211	0
Nestin	NES	0.750793	1.1818	1.10788	5.28932	2	0	0	-0.318818	0
Choline transporter-like protein 2	SLC44A2	0.394126	0.647921	0.766957	3.21572	2	0	0	-0.315788	0
Tubulin beta-6 chain	TUBB6	0.476097	0.620376	0.841055	3.76549	2	0	0	-0.311997	0
Translin	TSN	0.279802	0.269293	0.64062	2.29148	2	0	0	-0.296817	0
26S proteasome non-ATPase regulatory subunit 12	PSMD12	0.0224143	0.0177493	0.393831	1.70586	2	0	0	-0.293824	0
Synaptic vesicle membrane protein VAT-1 homolog	VAT1	0.619555	0.900472	0.959189	5.47643	2	0	0	-0.293178	0
Heat shock protein beta-3	HSPB3	0.325699	0.512345	0.676293	2.94802	2	0	0	-0.288559	0
Troponin C, slow skeletal and cardiac muscles	TNNC1	-1.50313	3.42007	-1.06143	4.66607	3	0	0	-0.283962	0
Sodium/potassium-transporting ATPase subunit alpha-3	ATP1A3	-1.00885	0.977971	-0.594557	4.68615	2	0	0	-0.282269	0
Splicing factor 3B subunit 2	SF3B2;DKFZp781L0540	0.263701	0.204689	0.60665	1.87847	2	0	0	-0.277077	0
Dihydropyrimidinase-related protein 3	DPYSL3	1.1451	3.67347	1.43572	5.76291	3	0	0	-0.270406	0
NADPH:adrenodoxin oxidoreductase, mitochondrial	FDXR	0.194243	0.149666	0.53109	1.82634	2	0	0	-0.266814	0
Fatty acid-binding protein, heart	FABP3	-1.46822	5.66859	-1.05841	4.68502	3	0	0	-0.252242	0
26S proteasome non-ATPase regulatory subunit 2	PSMD2;DKFZp564A2282	0.0692171	0.0497713	0.398546	1.6114	2	0	0	-0.251996	0
Replication protein A 70 kDa DNA-binding subunit;Replication protein A 70 kDa DNA-binding subunit, N-terminally processed	RPA1	0.470414	0.477462	0.777918	2.10869	2	0	0	-0.251065	0
Very-long-chain 3-oxoacyl-CoA reductase	HSD17B12	0.970464	0.495761	1.25137	4.54567	2	0	0	-0.250544	0
Myosin-binding protein C, cardiac-type	MYBPC3	-1.14902	4.3658	-0.767575	5.59848	3	0	0	-0.239889	0
60S ribosomal protein L3	RPL3;rpl3	0.666964	2.23979	0.953219	3.86411	3	0	0	-0.239471	0
Peroxiredoxin-4	HEL-S-97n;PRDX4	0.404619	0.819953	0.704555	3.14385	2	0	0	-0.239457	0
N-acylneuraminate cytidylyltransferase	CMAS	0.451034	0.196198	0.747582	2.21174	2	0	0	-0.238438	0
NADH-cytochrome b5 reductase 1	CYB5R1	-0.923559	2.47353	-0.555967	3.36256	3	0	0	-0.23769	0
F-actin-capping protein subunit alpha-1	CAPZA1	0.23094	0.0966518	0.535896	2.42146	2	0	0	-0.235188	0
Gamma-adducin	ADD3	0.531928	0.918379	0.817509	7.14194	2	0	0	-0.231323	0
Lumican	LUM	1.38597	0.640502	1.62597	6.30684	2	0	0	-0.230271	0
Dolichyl-diphosphooligosaccharide--protein glycosyltransferase subunit STT3B	STT3B	0.0350768	0.0170119	0.34271	1.35065	2	0	0	-0.227225	0
Tyrosine--tRNA ligase, cytoplasmic;Tyrosine--tRNA ligase, cytoplasmic, N-terminally processed;Tyrosine--tRNA ligase	YARS	0.226344	0.250691	0.518187	1.57853	2	0	0	-0.221099	0
Coatomer subunit delta	ARCN1;DKFZp686M09245	0.397735	0.451936	0.679699	3.3587	2	0	0	-0.220116	0
Interleukin enhancer-binding factor 3	ILF3	0.371104	0.206111	0.649795	3.29938	2	0	0	-0.215196	0
Calpain-1 catalytic subunit	CAPN1	0.060911	0.0254736	0.346935	2.19712	2	0	0	-0.205849	0
Delta-1-pyrroline-5-carboxylate synthase;Glutamate 5-kinase;Gamma-glutamyl phosphate reductase	ALDH18A1	0.9461	0.427888	1.18308	4.52437	2	0	0	-0.20285	0
Calreticulin	HEL-S-99n;CALR	0.199904	0.131292	0.475514	1.63902	2	0	0	-0.202516	0
Tyrosine-protein phosphatase non-receptor type 11	PTPN11	0.207979	0.175102	0.48248	3.18744	2	0	0	-0.20179	0
Transcription intermediary factor 1-beta	TRIM28	0.0488702	0.032879	0.330747	1.47213	2	0	0	-0.20081	0
Myosin-14	MYH14	0.310977	0.281406	0.578544	3.86137	2	0	0	-0.200148	0
Ras suppressor protein 1	RSU1	-0.667879	0.714845	-0.349707	2.4857	2	0	0	-0.19963	0
Serine/arginine-rich splicing factor 4	SRSF4;SFRS4	0.425225	0.3459	0.683629	1.52258	2	0	0	-0.196772	0
Protein-glutamine gamma-glutamyltransferase 2	HEL-S-45;TGM2	0.632778	1.59122	0.879993	4.98253	3	0	0	-0.196398	0
Nidogen-1	NID1	-0.0594438	0.061083	0.222894	1.306	2	1	0	-0.195332	0
Ezrin	EZR;HEL-S-105	0.0696953	0.0495132	0.345243	2.30217	2	0	0	-0.19528	0
Importin-7	IPO7	0.0484019	0.0200263	0.324682	1.32575	2	0	0	-0.194879	0
Protein NipSnap homolog 1	NIPSNAP1	0.164123	0.0969857	0.43328	1.4693	2	0	0	-0.193738	0
Choline-phosphate cytidylyltransferase A;Choline-phosphate cytidylyltransferase B	PCYT1A;hCG_2002711;PCYT1B	0.407001	0.722918	0.662893	1.55321	2	0	0	-0.193118	0
NADH-cytochrome b5 reductase;NADH-cytochrome b5 reductase 3;NADH-cytochrome b5 reductase 3 membrane-bound form;NADH-cytochrome b5 reductase 3 soluble form	CYB5R3	0.113792	0.11066	0.384816	2.73676	2	0	0	-0.192935	0
Hepatoma-derived growth factor	HDGF	0.331078	0.161699	0.590424	1.41349	2	0	0	-0.19258	0
Very long-chain specific acyl-CoA dehydrogenase, mitochondrial	ACADVL	-1.11914	2.84952	-0.784283	6.3253	3	0	0	-0.192383	0
Nucleolar protein 56	NOP56	0.680059	1.09856	0.917089	2.00134	2	0	0	-0.188256	0
Sorbin and SH3 domain-containing protein 2	SORBS2	-1.81137	5.26566	-1.45857	1.34113	3	0	0	-0.173186	0
Vinculin	VCL;HEL114	-0.646744	1.57516	-0.355827	3.65192	3	0	0	-0.172037	0
Casein kinase I isoform alpha	HEL-S-77p;CSNK1A1	0.204465	0.245223	0.447609	1.57922	2	0	0	-0.168514	0
Elongation factor 1-delta	EEF1D	1.10742	3.50223	1.29764	2.01756	3	0	0	-0.162411	0
Coatomer subunit alpha;Xenin;Proxenin	COPA	0.152149	0.127346	0.39162	2.61975	2	0	0	-0.161757	0
Probable 2-oxoglutarate dehydrogenase E1 component DHKTD1, mitochondrial	DHTKD1	-1.1	0.969911	-0.795605	2.32719	2	0	0	-0.161291	0
Adenine phosphoribosyltransferase	APRT	0.0961545	0.0383993	0.337251	1.38191	2	0	0	-0.160388	0
Translocon-associated protein subunit delta	SSR4	0.306281	0.216124	0.526486	1.59182	2	0	0	-0.149918	0
Protein FAM98B	FAM98B	0.0746113	0.0443813	0.305309	1.45643	2	0	0	-0.14823	0
Alpha-actinin-2	ACTN2	-0.859221	2.52308	-0.585545	4.94263	3	0	0	-0.142145	0
Serine/threonine-protein phosphatase CPPED1	CPPED1	-0.657543	0.393592	-0.398933	1.60625	2	0	0	-0.137357	0
THO complex subunit 4	ALYREF	0.676188	1.07596	0.864709	1.33539	2	0	0	-0.136862	0
Protein phosphatase 1 regulatory subunit;Protein phosphatase 1 regulatory subunit 12A	PPP1R12A	0.814593	1.25133	0.995519	4.34339	2	0	0	-0.136472	0
ELMO domain-containing protein 2	ELMOD2	0.454713	0.232438	0.653083	1.69078	2	0	0	-0.135056	0
Glycogen [starch] synthase, muscle	GYS1	-1.26272	2.93027	-0.975455	4.26637	3	0	0	-0.134256	0
General transcription factor II-I	GTF2I	0.531597	0.525435	0.716601	1.63149	2	0	0	-0.125188	0
NADH dehydrogenase [ubiquinone] iron-sulfur protein 2, mitochondrial	NDUFS2	-0.798312	1.48116	-0.544132	3.63757	3	0	0	-0.12493	0
Mannose-6-phosphate isomerase	MPI	-0.954484	1.03373	-0.692403	3.37414	2	0	0	-0.124664	0
Protein transport protein Sec31A	SEC31L1;SEC31A	0.326888	0.273855	0.520061	4.45936	2	0	0	-0.122532	0
KN motif and ankyrin repeat domain-containing protein 2	KANK2	0.160165	0.0880054	0.360813	1.71128	2	0	0	-0.121237	0
Unconventional myosin-Ic	MYO1C	-0.0330753	0.0287732	0.176363	1.68906	2	1	0	-0.119868	0
Desmin	tmp_locus_29;DES	-0.552466	0.974746	-0.316084	2.14291	2	0	0	-0.119691	0
Thyroid hormone receptor-associated protein 3	THRAP3	0.48027	0.314367	0.66073	1.34001	2	0	0	-0.117567	0
NADH dehydrogenase [ubiquinone] iron-sulfur protein 8, mitochondrial	NDUFS8	-0.549322	0.235737	-0.316378	1.5197	2	0	0	-0.116237	0
E3 ubiquitin/ISG15 ligase TRIM25	TRIM25	0.649827	0.672816	0.81923	2.70897	2	0	0	-0.11524	0
Heat shock protein beta-2	HSPB2	0.549657	1.23957	0.72298	3.89812	2	0	0	-0.113859	0
Heterogeneous nuclear ribonucleoprotein A/B	HNRNPAB	0.688939	0.49046	0.852417	1.5918	2	0	0	-0.111141	0
Nucleosome assembly protein 1-like 4	NAP1L4	0.417779	0.728519	0.5946	3.73398	2	0	0	-0.110287	0
40S ribosomal protein S18	RPS18	0.185128	0.142937	0.372067	1.66691	2	0	0	-0.108148	0
Collagen alpha-3(VI) chain	COL6A3	0.651617	0.286504	0.804446	5.20147	2	0	0	-0.097851	0
26S proteasome non-ATPase regulatory subunit 3	PSMD3	0.374223	0.55532	0.54093	3.9521	2	0	0	-0.0972162	0
Importin subunit beta-1	KPNB1	0.242246	0.420592	0.415308	2.98031	2	0	0	-0.0966525	0
Protein LYRIC	MTDH	0.461385	0.307238	0.620831	1.43909	2	0	0	-0.0943554	0
Transforming growth factor-beta-induced protein ig-h3	TGFBI	1.17719	0.959888	1.29678	6.02628	2	0	0	-0.0917247	0
Tubulin beta-4A chain	TUBB4A	0.889179	0.71921	1.02349	2.63949	2	0	0	-0.0913995	0
Alpha-1-antitrypsin;Short peptide from AAT	SERPINA1	0.38504	0.0880054	0.544069	1.88756	2	0	0	-0.0897111	0
Importin-5	RANBP5;IPO5	0.301201	0.191973	0.463697	2.54987	2	0	0	-0.0887523	0
Tripartite motif-containing protein 55	TRIM55	0.217953	0.0937609	0.383394	1.45893	2	0	0	-0.0872739	0
Laminin subunit alpha-5	LAMA5	0.536991	0.920197	0.681925	4.19985	2	0	0	-0.0832089	0
Serine/threonine-protein kinase MARK2	MARK2;Par1b	0.597782	0.362238	0.73952	1.73366	2	0	0	-0.0831842	0
KH domain-containing, RNA-binding, signal transduction-associated protein 1	KHDRBS1	0.668072	0.97963	0.79746	1.96582	2	0	0	-0.0740259	0
Acetyl-CoA acetyltransferase, mitochondrial	ACAT1	-0.830294	1.36195	-0.624813	1.14398	1	0	0	-0.0717871	0
Epoxide hydrolase 1	EPHX1	0.243455	0.265695	0.39217	2.67805	2	0	0	-0.0710303	0
6-phosphogluconolactonase	PGLS	0.36133	0.395048	0.49949	2.18149	2	0	0	-0.0663869	0
V-type proton ATPase catalytic subunit A	ATP6V1A	0.492361	0.447618	0.619855	3.29695	2	0	0	-0.0623493	0
3-hydroxyisobutyryl-CoA hydrolase, mitochondrial	HIBCH	0.159565	0.230711	0.29884	1.48662	2	0	0	-0.0564513	0
Sideroflexin;Sideroflexin-3	SFXN3	1.09749	1.05582	1.18356	4.65614	2	0	0	-0.0519709	0
Serine--tRNA ligase, cytoplasmic	SARS	0.4908	0.237561	0.608425	2.66952	2	0	0	-0.0518519	0
Carbonyl reductase family member 4	CBR4	0.459511	0.32887	0.576374	2.02299	2	0	0	-0.0493235	0
Heterogeneous nuclear ribonucleoprotein H;Heterogeneous nuclear ribonucleoprotein H, N-terminally processed	HNRNPH1	0.396936	0.598504	0.515444	3.4952	2	0	0	-0.0476132	0
Serine/threonine-protein phosphatase 2A 65 kDa regulatory subunit A alpha isoform	PPP2R1A	0.12727	0.112229	0.257419	2.04152	2	0	0	-0.0450433	0
60S ribosomal protein L8	RPL8	0.367378	1.09856	0.484688	2.06513	2	0	0	-0.0447221	0
Transmembrane emp24 domain-containing protein 4	TMED4	0.465286	0.666568	0.576416	2.26906	2	0	0	-0.0435937	0
Adipocyte plasma membrane-associated protein	APMAP	0.689568	0.55978	0.788063	4.88677	2	0	0	-0.0426146	0
Clathrin heavy chain;Clathrin heavy chain 1	CLTC	0.361379	1.00403	0.474999	4.65355	2	0	0	-0.040498	0
Mitogen-activated protein kinase;Mitogen-activated protein kinase 1	MAPK1	0.484705	0.595189	0.591823	3.24629	2	0	0	-0.0404299	0
Lysosome-associated membrane glycoprotein 1	LAMP1	0.799388	1.23549	0.888904	1.77512	2	0	0	-0.0391893	0
Nucleobindin-1	NUCB1	0.326823	0.162475	0.440851	2.17416	2	0	0	-0.0390258	0
Retinol-binding protein 1	RBP1	1.13595	2.39631	1.2076	3.32298	3	0	0	-0.038874	0
NA	COL18A1	0.712161	0.969911	0.80518	4.06326	2	0	0	-0.0380818	0
Growth factor receptor-bound protein 2	GRB2	0.433185	0.794824	0.539441	1.7681	2	0	0	-0.0366828	0
Unconventional myosin-XVIIIb	MYO18B	0.495174	0.248359	0.598059	1.35141	2	0	0	-0.0365409	0
Creatine kinase S-type, mitochondrial	CKMT2	-1.1239	2.00348	-0.936648	5.59382	3	0	0	-0.0363861	0
Heterogeneous nuclear ribonucleoprotein Q	SYNCRIP	0.21741	0.18502	0.332713	1.82444	2	0	0	-0.0343441	0
Polypyrimidine tract-binding protein 1	PTBP1	0.275771	0.135113	0.38768	1.35146	2	0	0	-0.0339776	0
Sorting nexin-12	SNX12	0.504185	0.410705	0.603618	1.92525	2	0	0	-0.0333948	0
Non-POU domain-containing octamer-binding protein	NONO	0.688261	1.26217	0.775862	4.47758	2	0	0	-0.0310495	0
NA	MYH7	-1.34227	1.04236	-1.14897	4.46177	2	0	0	-0.0307358	0
T-complex protein 1 subunit epsilon	HEL-S-69;CCT5	0.421488	0.715772	0.522075	2.87396	2	0	0	-0.0300578	0
Dolichyl-diphosphooligosaccharide--protein glycosyltransferase subunit DAD1	DAD1	0.144907	0.0996186	0.258536	1.56084	2	0	0	-0.0285851	0
3-ketoacyl-CoA thiolase, mitochondrial	ACAA2	-1.09174	1.51189	-0.914216	5.11887	3	0	0	-0.0278877	0
Membrane-associated progesterone receptor component 1	PGRMC1	0.781562	1.23957	0.854249	3.23462	2	0	0	-0.0204521	0
Vacuolar protein-sorting-associated protein 25	VPS25	0.56711	0.388881	0.648182	1.67483	2	0	0	-0.0174888	0
Acyl-CoA-binding protein	DBI	-1.08069	1.32835	-0.915756	4.27317	3	0	0	-0.0152113	0
ATP-dependent RNA helicase A	DHX9	0.288702	0.240096	0.381195	1.50092	2	0	0	-0.014205	0
L-xylulose reductase	DCXR	-1.22327	4.46301	-1.05214	3.76237	3	0	0	-0.0138997	0
Muscle-related coiled-coil protein	MURC	0.48604	0.277295	0.566526	1.5798	2	0	0	-0.012405	0
60 kDa SS-A/Ro ribonucleoprotein	TROVE2	0.282816	0.117914	0.373852	1.35582	2	0	0	-0.012343	0
Troponin T, cardiac muscle	TNNT2;HNTN1	-0.480434	0.598625	-0.354827	2.11643	2	0	0	-0.00678211	0
Gamma-enolase;Enolase	ENO2	0.467126	0.647921	0.541281	2.11687	2	0	0	-0.00468416	0
Elongation factor 1-beta	EEF1B2;LOC392793	0.567478	1.05109	0.635002	2.85392	2	0	0	-0.00321475	0
Serine/arginine-rich splicing factor 10	SRSF10	0.779294	0.907667	0.834751	2.55206	2	0	0	-0.00214809	0
Protein kinase C delta-binding protein	PRKCDBP	0.571397	0.586374	0.63712	1.9515	2	0	0	-0.00152982	0
60S ribosomal protein L32	RPL32	0.8056	1.42716	0.855079	2.30375	3	0	0	0.00270999	0
Prostaglandin E synthase 3	PTGES3	0.412815	0.41534	0.482361	1.70029	2	0	0	0.00317068	0
ELAV-like protein 1	ELAVL1	0.436871	0.586374	0.504305	2.6501	2	0	0	0.00407348	0
Heterogeneous nuclear ribonucleoprotein A0	HNRNPA0	0.562825	0.587951	0.623604	2.6701	2	0	0	0.00415868	0
Chloride channel CLIC-like protein 1	CLCC1	0.823701	0.537455	0.870327	2.35546	2	0	0	0.00472428	0
Signal recognition particle receptor subunit alpha	SRPR	0.559289	0.656926	0.615271	1.58007	2	0	0	0.00941541	0
Probable ATP-dependent RNA helicase DDX5	DDX5;DKFZp686J01190	0.303798	0.301948	0.372701	2.27626	2	0	0	0.0098523	0
Regulator of nonsense transcripts 1	UPF1	0.25863	0.165803	0.327852	1.82845	2	0	0	0.0120041	0
Protein flightless-1 homolog	FLII	0.250673	0.101129	0.319545	2.2344	2	0	0	0.0128116	0
Staphylococcal nuclease domain-containing protein 1	SND1	0.561157	1.69445	0.610685	3.41171	3	0	0	0.016121	0
Phosphatidylinositide phosphatase SAC1	SACM1L	0.430284	0.325814	0.486293	1.36245	2	0	0	0.016491	0
Aspartate aminotransferase;Aspartate aminotransferase, mitochondrial	GOT2	-0.655838	1.09856	-0.544211	3.42211	2	0	0	0.0176275	0
Coronin;Coronin-1C	CORO1C	1.02733	0.68909	1.0498	3.84873	2	0	0	0.0190017	0
Coatomer subunit beta	COPB1	0.401611	0.391092	0.453489	3.05836	2	0	0	0.0224288	0
Early endosome antigen 1	EEA1	0.578951	0.441445	0.620072	3.08606	2	0	0	0.0240115	0
ATPase family AAA domain-containing protein 1	ATAD1	0.45516	0.411981	0.501403	1.82284	2	0	0	0.0254246	0
Septin-11	"SEPT11"	0.81574	1.20219	0.842747	3.80843	2	0	0	0.0258615	0
Probable ATP-dependent RNA helicase DDX17	DDX17	0.5037	0.957965	0.543274	1.79212	2	0	0	0.0297881	0
Eukaryotic translation elongation factor 1 epsilon-1	EEF1E1;EEF1E1-BLOC1S5	0.861218	2.72019	0.878085	3.10716	3	0	0	0.0340548	0
Serpin H1	SERPINH1	0.492511	0.658587	0.528194	2.88881	2	0	0	0.0345096	0
T-complex protein 1 subunit theta	CCT8	0.360481	0.840143	0.400816	3.82007	2	0	0	0.0368725	0
NADH dehydrogenase [ubiquinone] 1 subunit C2;NADH dehydrogenase [ubiquinone] 1 subunit C2, isoform 2	NDUFC2;KCTD14;NDUFC2-KCTD14	-0.454901	0.253817	-0.373308	1.55927	2	0	0	0.0382498	0
Utrophin	UTRN	0.52407	0.569319	0.551801	3.33098	2	0	0	0.0411602	0
Glutathione reductase, mitochondrial	HEL-75;GSR	0.28385	0.348464	0.322801	2.01485	2	0	0	0.0425528	0
Septin-8	"SEPT8"	0.533223	0.383501	0.555406	2.94541	2	0	0	0.0465109	0
Coatomer subunit beta	COPB2	0.604204	0.580781	0.622502	3.69196	2	0	0	0.0467006	0
Succinate dehydrogenase [ubiquinone] flavoprotein subunit, mitochondrial	SDHA	-0.705212	1.11631	-0.618589	6.28205	2	0	0	0.0467283	0
T-complex protein 1 subunit beta	HEL-S-100n;CCT2	0.501199	1.15547	0.524046	2.58411	2	0	0	0.0475738	0
26S protease regulatory subunit 7	PSMC2	0.210718	0.370821	0.248231	1.56477	2	0	0	0.0480983	0
Peptidyl-prolyl cis-trans isomerase;Peptidyl-prolyl cis-trans isomerase B	HEL-S-39;PPIB	0.707707	1.76033	0.719189	3.45387	3	0	0	0.0481915	0
LEM domain-containing protein 2	LEMD2	0.560671	0.592356	0.578356	2.42945	2	0	0	0.0497446	0
Signal recognition particle receptor subunit beta	SRPRB	0.491343	0.320208	0.511045	1.98879	2	0	0	0.0514347	0
Cullin-associated NEDD8-dissociated protein 1	CAND1	0.871578	1.37399	0.868539	5.00954	3	0	0	0.0544872	0
Cell cycle and apoptosis regulator protein 2	CCAR2	0.386327	0.170468	0.408116	1.87822	2	0	0	0.0550169	0
Golgi integral membrane protein 4	GOLIM4	0.7323	0.303134	0.733646	1.81413	2	0	0	0.0575318	0
Probable C->U-editing enzyme APOBEC-2	APOBEC2	-0.521001	0.582879	-0.456647	1.80307	2	0	0	0.0600786	0
Nuclear protein localization protein 4 homolog	NPLOC4	0.317431	0.188547	0.336581	1.73472	2	0	0	0.0615955	0
T-complex protein 1 subunit eta	CCT7	0.542791	1.52945	0.546333	4.18089	3	0	0	0.0656518	0
Alpha/beta hydrolase domain-containing protein 11	ABHD11	0.649602	0.747967	0.644221	2.13943	2	0	0	0.0691833	0
NA	ASAH1	-0.363966	0.786187	-0.319956	1.62392	2	0	0	0.0728946	0
Pyruvate dehydrogenase E1 component subunit alpha;Pyruvate dehydrogenase E1 component subunit alpha, somatic form, mitochondrial	PDHA1;PDHA1/LOC79064	-0.423552	0.438055	-0.377221	3.8966	2	0	0	0.0737271	0
ATP-dependent RNA helicase DDX42	DDX42	0.967894	1.28594	0.938863	1.52143	2	0	0	0.076605	0
Medium-chain specific acyl-CoA dehydrogenase, mitochondrial	ACADM;DKFZp686M24262	-0.527239	0.715772	-0.478395	2.42161	2	0	0	0.0767855	0
26S proteasome non-ATPase regulatory subunit 13	PSMD13	0.572096	0.802439	0.561128	3.09139	2	0	0	0.0793465	0
Filamin-A	FLNA	1.34413	2.74175	1.28931	5.17147	3	0	0	0.0830973	0
AP-2 complex subunit alpha-1	AP2A1	0.646415	0.538563	0.626386	3.8879	2	0	0	0.0848131	0
Delta-aminolevulinic acid dehydratase	ALAD	-0.733467	1.09856	-0.688754	1.86808	2	0	0	0.0925027	0
GTP:AMP phosphotransferase AK3, mitochondrial	AK3	-0.301512	0.393025	-0.27965	3.8996	2	0	0	0.0928231	0
Sarcoplasmic reticulum histidine-rich calcium-binding protein	HRC	-0.730462	0.782056	-0.687299	3.68355	2	0	0	0.0939721	0
Heat shock protein 105 kDa	HSPH1	0.481956	0.33516	0.459742	2.46304	2	0	0	0.0961769	0
Chloride intracellular channel protein;Chloride intracellular channel protein 1	CLIC1	0.451689	0.592356	0.430143	1.54585	2	0	0	0.0971391	0
Ragulator complex protein LAMTOR1	LAMTOR1	-0.257161	0.181274	-0.244944	1.31659	2	0	0	0.100555	0
SUN domain-containing protein 1	SUN1;UNC84A	0.604705	0.808332	0.571232	3.26216	2	0	0	0.101295	0
GTP-binding protein 1	GTPBP1	0.460145	0.317948	0.434035	1.35822	2	0	0	0.101489	0
Tubulin alpha-1B chain	TUBA1B	0.607144	2.53599	0.572507	1.98886	3	0	0	0.102388	0
Heterogeneous nuclear ribonucleoprotein D0	HNRPD;HNRNPD	0.755248	1.58877	0.710211	2.90887	3	0	0	0.105204	0
Endoplasmin	TRA1;HEL-S-125m;HSP90B1	0.673358	3.08603	0.632215	4.38775	3	0	0	0.105606	0
TSC22 domain family protein 2	TSC22D2	1.12413	0.792375	1.05714	1.75736	2	0	0	0.108053	0
Metaxin-1	MTX1	0.43167	0.261022	0.398911	1.34829	2	0	0	0.110072	0
Iron-sulfur protein NUBPL	NUBPL	-0.378487	0.345243	-0.370083	2.13384	2	0	0	0.111261	0
Heat shock protein HSP 90-alpha	EL52;HSP90AA1	0.375563	1.04627	0.343025	4.06827	2	0	0	0.112928	0
RuvB-like 2	RUVBL2	0.43719	0.701229	0.397044	2.86786	2	0	0	0.117562	0
Acyl-CoA synthetase family member 2, mitochondrial	ACSF2	1.17624	1.31378	1.09148	6.27457	3	0	0	0.123921	0
Adenylate kinase isoenzyme 1	AK1	-0.430545	0.491081	-0.433744	2.68633	2	0	0	0.12637	0
Beta-enolase;Enolase	ENO3	-1.16628	4.6958	-1.13107	5.41732	3	0	0	0.126372	0
Pyruvate dehydrogenase protein X component, mitochondrial	PDHX	-0.437132	1.10332	-0.441041	2.92783	2	0	0	0.127481	0
Collagen alpha-2(VI) chain	COL6A2	0.968737	1.18554	0.890918	5.43131	2	0	0	0.128035	0
NA	RAB6A	0.636228	1.09856	0.574369	2.9228	2	0	0	0.129508	0
Histone H1x	H1FX	0.489057	0.678438	0.433969	1.33379	2	0	0	0.13047	0
EH domain-containing protein 3	EHD3	0.556464	0.756158	0.496263	2.05446	2	0	0	0.132152	0
Endoplasmic reticulum resident protein 44	ERP44	0.588161	0.800728	0.525993	2.84916	2	0	0	0.132481	0
Myosin-7	MYH7	-1.1785	4.77359	-1.14897	4.46177	3	0	0	0.13304	0
Protein disulfide-isomerase;Protein disulfide-isomerase A3	HEL-S-269;PDIA3	0.480163	1.25268	0.422665	3.46537	2	0	0	0.133503	0
Isovaleryl-CoA dehydrogenase, mitochondrial	IVD	0.373951	0.792365	0.320725	2.46776	2	0	0	0.134845	0
Succinyl-CoA ligase [ADP/GDP-forming] subunit alpha, mitochondrial	SUCLG1	-0.488286	0.782056	-0.497824	3.93644	2	0	0	0.136238	0
ATP-dependent 6-phosphofructokinase, liver type	PFKL	0.355977	0.572353	0.302352	1.31153	2	0	0	0.136256	0
Ras-related protein Rab-7a	RAB7A	-0.327804	0.245223	-0.3461	1.50551	2	0	0	0.136641	0
Translational activator GCN1	PRIC295;GCN1L1	0.541463	0.431242	0.476744	1.55785	2	0	0	0.137745	0
Protein kinase C and casein kinase substrate in neurons protein 2	PACSIN2	0.387991	0.321532	0.329213	1.74434	2	0	0	0.139929	0
Vigilin	HDLBP	0.698074	0.646277	0.622622	2.3398	2	0	0	0.140444	0
Vacuolar protein sorting-associated protein 45	VPS45	0.717603	0.622037	0.638346	2.31526	2	0	0	0.143383	0
GTP-binding nuclear protein Ran	RAN	0.446562	0.786187	0.380849	1.9155	2	0	0	0.14402	0
Alpha-crystallin B chain	HEL-S-101;CRYAB	-0.390227	0.321949	-0.41327	2.49119	2	0	0	0.145087	0
Nuclear mitotic apparatus protein 1	NUMA1;NUMA1 variant protein	0.798366	1.1974	0.709444	2.87202	2	0	0	0.149132	0
Cytoplasmic FMR1-interacting protein 2	CYFIP2;DKFZp761H087	0.806742	0.918379	0.71597	1.56082	2	0	0	0.150623	0
Beta-2-syntrophin	SNTB2	1.04405	2.10731	0.940275	2.54638	3	0	0	0.151272	0
Signal transducer and activator of transcription 1-alpha/beta;Signal transducer and activator of transcription	STAT1	0.534554	0.604941	0.454325	1.68898	2	0	0	0.154489	0
U6 snRNA-associated Sm-like protein LSm8	LSM8	0.575144	0.369287	0.492795	1.306	2	0	0	0.154491	0
PDZ and LIM domain protein 1	HEL-S-112;PDLIM1	-0.966631	1.93058	-0.969314	5.46281	3	0	0	0.15535	0
Myosin regulatory light polypeptide 9	MYL9	0.935004	1.16799	0.832932	2.90969	2	0	0	0.155481	0
Phosphoglucomutase-1	PGM1	-0.635186	3.77879	-0.657752	4.08523	3	0	0	0.158075	0
Plexin-B2	PLXNB2	1.146	0.534813	1.02987	1.94347	2	0	0	0.158688	0
Protein SET;Protein SETSIP	SET;SETSIP	0.546468	1.09161	0.461571	1.40576	2	0	0	0.158759	0
Enhancer of rudimentary homolog	ERH	0.77769	0.50346	0.675751	1.57639	2	0	0	0.164005	0
Short/branched chain specific acyl-CoA dehydrogenase, mitochondrial	ACADSB	0.486741	1.02293	0.398709	2.36727	2	0	0	0.165355	0
NADH dehydrogenase [ubiquinone] 1 beta subcomplex subunit 11, mitochondrial	NDUFB11	-0.371007	0.300117	-0.416311	1.58277	2	0	0	0.167514	0
T-complex protein 1 subunit delta	CCT4	0.637558	1.8666	0.537566	3.69993	3	0	0	0.169668	0
Myomesin-1	MYOM1	-0.704454	1.67807	-0.734508	1.56621	3	0	0	0.16979	0
Septin-2	"SEPT2"	0.693938	1.51189	0.589769	2.35314	3	0	0	0.17097	0
RNA-binding protein 14	RBM14	0.947149	0.977971	0.829563	1.57306	2	0	0	0.17118	0
Ras-related protein Rab-35	RAB35	0.763628	0.724717	0.646794	1.86811	2	0	0	0.180494	0
Prolow-density lipoprotein receptor-related protein 1;Low-density lipoprotein receptor-related protein 1 85 kDa subunit;Low-density lipoprotein receptor-related protein 1 515 kDa subunit;Low-density lipoprotein receptor-related protein 1 intracellular domain	LRP1	0.99946	1.68575	0.869558	2.62775	3	0	0	0.181293	0
LDLR chaperone MESD	MESDC2	0.566111	0.468283	0.454829	2.12207	2	0	0	0.185514	0
Succinate-semialdehyde dehydrogenase, mitochondrial	ALDH5A1	-0.578726	0.605114	-0.631905	2.57694	2	0	0	0.187264	0
AP-2 complex subunit mu	AP2M1	0.77965	0.343254	0.655278	3.08435	2	0	0	0.187565	0
Electron transfer flavoprotein subunit beta	ETFB	-0.553819	0.947728	-0.610541	4.32902	2	0	0	0.18963	0
Vesicle-trafficking protein SEC22b	SEC22B	0.619582	0.653535	0.501154	3.20684	2	0	0	0.19011	0
Guanine nucleotide-binding protein G(I)/G(S)/G(O) subunit gamma-7	GNG7	0.713345	0.480922	0.589985	1.35134	2	0	0	0.19015	0
Enoyl-CoA hydratase, mitochondrial	ECHS1	-0.430421	0.779135	-0.49694	2.42045	2	0	0	0.19317	0
Myosin regulatory light chain 12A;Myosin regulatory light chain 12B	MYL12A;MYL12B	0.6515	1.13532	0.528173	1.34724	2	0	0	0.19352	0
T-complex protein 1 subunit gamma	CCT3	0.511459	1.90264	0.391181	2.542	3	0	0	0.198017	0
U2 small nuclear ribonucleoprotein A	SNRPA1	0.718787	0.456016	0.587664	1.37472	2	0	0	0.19804	0
X-ray repair cross-complementing protein 6	XRCC6	0.476392	0.388881	0.357352	2.67147	2	0	0	0.198642	0
Adenylyl cyclase-associated protein 2;Adenylyl cyclase-associated protein	CAP2;DKFZp686D0714	-0.509401	0.503113	-0.578502	2.89285	2	0	0	0.200245	0
Acyl-coenzyme A thioesterase 1	ACOT1	-0.291239	0.293592	-0.37468	2.3299	2	0	0	0.203359	0
Moesin	HEL70;MSN	0.351055	0.45293	0.233698	1.68646	2	0	0	0.203769	0
Collagen alpha-1(I) chain	COL1A1	2.11041	2.33884	1.90003	6.59569	3	0	0	0.205013	0
14-3-3 protein sigma	SFN	0.397971	1.49476	0.276677	0.351837	1	0	0	0.205338	0
Apoptosis-inducing factor 1, mitochondrial	AIFM1	-0.285809	0.510594	-0.372091	3.69463	2	0	0	0.206057	0
Hydroxyacyl-coenzyme A dehydrogenase, mitochondrial	HADH	-0.780528	1.34725	-0.841216	6.29428	3	0	0	0.2063	0
Sorcin	SRI	0.543341	1.0554	0.41231	1.32231	2	0	0	0.207606	0
14-3-3 protein zeta/delta	YWHAZ	0.358544	0.694993	0.236453	1.54847	2	0	0	0.208351	0
Transmembrane emp24 domain-containing protein 7	TMED7-TICAM2;TMED7	0.604769	0.261862	0.469641	1.33682	2	0	0	0.208545	0
Splicing factor U2AF 65 kDa subunit	U2AF2	0.634635	0.393511	0.497764	1.51906	2	0	0	0.20874	0
Acetyltransferase component of pyruvate dehydrogenase complex;Dihydrolipoyllysine-residue acetyltransferase component of pyruvate dehydrogenase complex, mitochondrial	DLAT	-0.37276	0.773471	-0.457332	3.98308	2	0	0	0.209042	0
Rho-associated protein kinase;Rho-associated protein kinase 1	ROCK1	0.843304	0.459308	0.695014	1.44101	2	0	0	0.209295	0
Rho GTPase-activating protein 1	ARHGAP1	1.04141	2.18376	0.879262	3.79591	3	0	0	0.213009	0
Protein deglycase DJ-1	HEL-S-67p;PARK7	-0.277254	0.577126	-0.37081	1.93741	2	0	0	0.213261	0
26S protease regulatory subunit 6B	PSMC4	0.429678	0.582879	0.299087	2.06089	2	0	0	0.213402	0
Single-stranded DNA-binding protein;Single-stranded DNA-binding protein, mitochondrial	SSBP1	0.695326	2.24478	0.550179	3.4323	3	0	0	0.214128	0
Annexin;Annexin A4	HEL-S-274;ANXA4	0.830608	1.02898	0.67513	3.44058	2	0	0	0.217578	0
60S ribosomal protein L27	RPL27	0.746941	1.28209	0.591285	2.92912	2	0	0	0.222373	0
Transketolase	HEL107;TKT	1.16572	2.93027	0.986846	3.94425	3	0	0	0.223801	0
Adenylosuccinate synthetase isozyme 1	ADSSL1	-0.384681	0.677986	-0.487088	1.59459	2	0	0	0.228515	0
NADH dehydrogenase [ubiquinone] flavoprotein 1, mitochondrial	NDUFV1	-0.716388	1.06514	-0.803615	6.53051	2	0	0	0.230769	0
Malonyl-CoA decarboxylase, mitochondrial	MLYCD	-0.338692	0.49046	-0.446723	2.75457	2	0	0	0.231917	0
GTP-binding protein SAR1a	SAR1A;SARA1	0.602463	0.456016	0.444902	2.58762	2	0	0	0.232341	0
Matrin-3	MATR3;DKFZp686K23100	0.504018	1.08963	0.349826	3.35285	2	0	0	0.234207	0
NADH dehydrogenase [ubiquinone] flavoprotein 2, mitochondrial	NDUFV2	-0.684525	0.558751	-0.778379	5.41828	2	0	0	0.236006	0
Splicing factor, proline- and glutamine-rich	SFPQ	0.811955	2.49012	0.638608	2.00735	3	0	0	0.237458	0
CLIP-associating protein 1	CLASP1;DKFZp686D1968	-0.351853	0.0872063	-0.465012	1.86125	2	0	0	0.238052	0
60S acidic ribosomal protein P2	RPLP2	0.422366	0.443896	0.26678	1.42659	2	0	0	0.240175	0
Tropomyosin beta chain	TPM2	-0.37615	0.168549	-0.490727	1.97956	2	0	0	0.240886	0
Calnexin	CANX	0.410461	0.965574	0.254775	1.80958	2	0	0	0.240936	0
Tubulin beta-2B chain	TUBB2B	0.48285	1.1811	0.321412	1.90008	2	0	0	0.243019	0
Prelamin-A/C;Lamin-A/C	LMNA	0.677111	2.17674	0.504694	3.59152	3	0	0	0.243903	0
Aconitate hydratase, mitochondrial	ACO2	-0.338558	0.798452	-0.458994	3.64583	2	0	0	0.244997	0
Omega-amidase NIT2	HEL-S-8a;NIT2	-0.292061	0.163967	-0.415007	2.04493	2	0	0	0.245085	0
ATP synthase subunit O, mitochondrial	ATP5O	-0.215367	0.307729	-0.343145	2.46211	2	0	0	0.245959	0
Histone H2A.V;Histone H2A.Z;Histone H2A	H2AFV;H2AFZ	0.631078	2.10182	0.455954	0.822758	1	0	0	0.249295	0
Myosin-9	MYH9	0.505585	1.10834	0.328851	1.78745	2	0	0	0.257905	0
NA	RPL14	0.482645	0.878977	0.305126	1.53677	2	0	0	0.259997	0
V-type proton ATPase subunit B, brain isoform	ATP6V1B2	0.655853	0.812346	0.465341	1.48706	2	0	0	0.264166	0
Trifunctional enzyme subunit beta, mitochondrial;3-ketoacyl-CoA thiolase	HADHB	-0.377087	0.582494	-0.515246	5.31662	2	0	0	0.265819	0
60S ribosomal protein L14	RPL14	0.490608	0.387421	0.305126	1.53677	2	0	0	0.267959	0
Phosphoglycerate mutase 2;Phosphoglycerate mutase	PGAM2	0.505972	0.363002	0.319092	1.30667	2	0	0	0.268589	0
[Pyruvate dehydrogenase (acetyl-transferring)] kinase isozyme 2, mitochondrial	PDK2	-0.10307	0.042351	-0.263474	1.49545	2	0	0	0.274197	0
NADH dehydrogenase [ubiquinone] 1 alpha subcomplex subunit 5	NDUFA5	-0.49998	0.399393	-0.643409	2.6322	2	0	0	0.278148	0
Microtubule-associated protein RP/EB family member 1	MAPRE1	0.689658	1.09856	0.483581	1.58816	2	0	0	0.278726	0
Sodium/potassium-transporting ATPase subunit alpha-1	ATP1A1	0.543711	1.36195	0.344861	1.2071	1	0	0	0.27914	0
NADH dehydrogenase [ubiquinone] 1 alpha subcomplex subunit 13	NDUFA13	-0.424205	0.47266	-0.576029	4.65165	2	0	0	0.282831	0
Methyl-CpG-binding protein 2	MECP2	1.04176	1.60441	0.813026	1.79576	3	0	0	0.283238	0
Puromycin-sensitive aminopeptidase	NPEPPS	0.42553	1.18554	0.228559	1.35104	2	0	0	0.283666	0
MICOS complex subunit MIC19	CHCHD3	-0.38035	0.637458	-0.540157	3.07514	2	0	0	0.288838	0
Dolichyl-diphosphooligosaccharide--protein glycosyltransferase subunit 1	RPN1	0.599834	2.13849	0.386673	4.13895	3	0	0	0.291148	0
Aldehyde dehydrogenase X, mitochondrial	ALDH1B1	0.630808	1.37392	0.412649	0.595262	1	0	0	0.294715	0
Protein S100;Protein S100-A11;Protein S100-A11, N-terminally processed	HEL-S-43;S100A11	0.824711	0.53641	0.596308	1.55795	2	0	0	0.294843	0
Fatty aldehyde dehydrogenase	ALDH3A2;DKFZp686E23276	-0.110503	0.078818	-0.29239	2.09695	2	0	0	0.297272	0
Secernin-1	SCRN1	1.16812	4.10069	0.91656	3.17803	3	0	0	0.300359	0
Alpha-adducin	ADD1;LA04NC01-25A3.2-001	1.02845	2.2706	0.781681	4.76415	3	0	0	0.302999	0
Cytoskeleton-associated protein 4	CKAP4	0.732374	2.03552	0.497605	3.69743	3	0	0	0.306647	0
Hsc70-interacting protein;Putative protein FAM10A5;Putative protein FAM10A4	ST13;ST13P5;ST13P4	0.759266	1.1811	0.522154	2.6405	2	0	0	0.307638	0
Heterogeneous nuclear ribonucleoprotein M	HNRNPM;ORF	0.704034	2.24365	0.468491	1.49551	3	0	0	0.309023	0
26S protease regulatory subunit 10B	HEL-S-73;PSMC6	0.508885	0.715786	0.281971	1.51801	2	0	0	0.310667	0
Hypoxia up-regulated protein 1	HYOU1	0.538147	1.30908	0.305007	1.13277	1	0	0	0.315625	0
T-complex protein 1 subunit alpha	TCP1	0.803896	3.08603	0.555128	3.93288	3	0	0	0.317477	0
Tripeptidyl-peptidase 2	TPP2	0.853297	0.821942	0.601708	2.66949	2	0	0	0.317733	0
Fumarate hydratase, mitochondrial	FH	0.00660277	0.00413291	-0.2026	1.75998	2	1	0	0.319644	0
TIP41-like protein	TIPRL	-0.34581	0.216946	-0.537562	1.98632	2	0	0	0.320641	0
14-3-3 protein eta	YWHAH	0.552155	0.388285	0.310403	1.47558	2	0	0	0.323939	0
Lipoma-preferred partner	LPP	0.933123	1.83664	0.671125	4.80748	3	0	0	0.324319	0
DNA helicase;DNA replication licensing factor MCM7	MCM7	1.18944	1.98185	0.91403	0.502696	1	0	0	0.324358	0
60S ribosomal protein L24	RPL24;HEL-S-310	0.483395	1.5075	0.240962	0.465009	1	0	0	0.328444	0
A-kinase anchor protein 12	AKAP12	1.4646	1.32727	1.16959	4.17325	3	0	0	0.329871	0
Coatomer subunit gamma-1	COPG1;COPG	0.707169	0.777742	0.448506	2.51795	2	0	0	0.333244	0
Cysteine desulfurase, mitochondrial	NFS1	-0.184869	0.122661	-0.398071	1.91324	2	0	0	0.334409	0
Microfibrillar-associated protein 5	MFAP5	1.39606	0.342895	1.09921	2.38446	2	0	0	0.335586	0
Quinone oxidoreductase	CRYZ	0.700555	1.41716	0.437219	1.01269	1	0	0	0.338539	0
ELKS/Rab6-interacting/CAST family member 1	ERC1	1.1065	2.52308	0.820329	1.67861	3	0	0	0.340274	0
Actin-related protein 2/3 complex subunit 1A	HEL-68;ARPC1A	0.675437	1.11917	0.410143	1.31813	2	0	0	0.341988	0
60S ribosomal protein L4	RPL4	0.533475	1.78504	0.27496	1.00546	1	0	0	0.342654	0
NADH dehydrogenase [ubiquinone] 1 alpha subcomplex subunit 9, mitochondrial	NDUFA9	-0.320533	0.546984	-0.541152	4.12836	2	0	0	0.349706	0
SH3 domain-binding glutamic acid-rich-like protein	HEL-S-115;SH3BGRL	2.5028	3.08603	2.13158	7.74899	3	0	0	0.353104	0
Alanine--tRNA ligase, cytoplasmic	AARS	0.603743	1.09856	0.327616	1.61751	2	0	0	0.357367	0
60S ribosomal protein L18a	RPL18A	0.574241	2.24365	0.2946	1.02769	1	0	0	0.362699	0
Sulfite oxidase, mitochondrial	SUOX	-0.403587	0.179134	-0.633937	1.91284	2	0	0	0.364547	0
Cytochrome c oxidase subunit 5B, mitochondrial	COX5B	-0.106664	0.0648435	-0.35478	2.2099	2	0	0	0.366938	0
N(G),N(G)-dimethylarginine dimethylaminohydrolase 2	HEL-S-277;DDAH2	0.828322	1.25133	0.521074	3.24872	2	0	0	0.377833	0
Tricarboxylate transport protein, mitochondrial	SLC25A1	0.539584	1.49828	0.242468	0.770023	1	0	0	0.383045	0
28S ribosomal protein S29, mitochondrial	DAP3	-0.146218	0.0589481	-0.410422	1.36972	2	0	0	0.38609	0
EH domain-containing protein 4	EHD4	0.629643	0.989224	0.323342	2.09266	2	0	0	0.387776	0
Glyoxalase domain-containing protein 4	GLOD4	0.638209	1.23535	0.329045	1.55813	2	0	0	0.390324	0
Cytochrome b-c1 complex subunit 2, mitochondrial	UQCRC2	-0.222496	0.19084	-0.489588	4.90724	2	0	0	0.393339	0
Cadherin-13	CDH13	-0.259242	0.0602457	-0.525789	2.13157	2	0	0	0.394788	0
Ras-related protein Rab-11B;Ras-related protein Rab-11A	RAB11B;RAB11A	0.780464	1.65527	0.458751	3.82905	3	0	0	0.39573	0
Integrin alpha-V;Integrin alpha-V heavy chain;Integrin alpha-V light chain	ITGAV	0.893561	1.29745	0.565695	1.73673	2	0	0	0.395993	0
Valine--tRNA ligase	VARS	0.608577	0.715772	0.294628	2.32805	2	0	0	0.397005	0
Actin-related protein 2/3 complex subunit 5;Actin-related protein 2/3 complex subunit 5-like protein	ARPC5L	0.802478	0.688355	0.47791	2.24068	2	0	0	0.397529	0
Dihydrolipoyl dehydrogenase;Dihydrolipoyl dehydrogenase, mitochondrial	DLD	-0.362576	0.573196	-0.632524	4.72143	2	0	0	0.404066	0
Myosin light chain 4	MYL4	2.96693	4.04995	2.51906	7.8922	3	0	0	0.408422	0
Dolichyl-diphosphooligosaccharide--protein glycosyltransferase subunit 2	RPN2	0.62457	2.04752	0.296154	1.60001	3	0	0	0.411388	0
Nicotinamide phosphoribosyltransferase	PBEF1;NAMPT	-0.0524398	0.0261541	-0.349198	2.23507	2	0	0	0.415272	0
Laminin subunit beta-1	LAMB1	-0.250618	0.258429	-0.538106	2.43894	2	0	0	0.416407	0
Sorting nexin-6;Sorting nexin-6, N-terminally processed	SNX6	0.703445	0.792375	0.365419	1.3104	2	0	0	0.417183	0
Ubiquitin carboxyl-terminal hydrolase isozyme L3;Ubiquitin carboxyl-terminal hydrolase	UCHL3	-0.47838	0.343671	-0.757103	4.26692	2	0	0	0.419703	0
Talin-1	TLN1	0.805835	2.19791	0.45973	3.87485	3	0	0	0.420068	0
Atypical kinase ADCK3, mitochondrial	CABC1;ADCK3	-0.306874	0.493832	-0.597632	2.58333	2	0	0	0.422955	0
Cofilin-2	CFL2	-0.537908	0.964215	-0.818392	2.92688	2	0	0	0.424839	0
Annexin;Annexin A5	HEL-S-7;ANXA5	1.03124	2.56053	0.66683	3.70666	3	0	0	0.42697	0
Adenylyl cyclase-associated protein;Adenylyl cyclase-associated protein 1	CAP1	0.998017	2.01537	0.634718	3.52501	3	0	0	0.427625	0
26S proteasome non-ATPase regulatory subunit 7	PSMD7	0.886708	0.8973	0.526794	3.23449	2	0	0	0.430183	0
Erlin-2	ERLIN2	0.663952	0.975911	0.312269	2.05903	2	0	0	0.433767	0
Nck-associated protein 1	NCKAP1	0.74676	0.453609	0.389908	1.39626	2	0	0	0.434661	0
Elongation factor 1-gamma	EEF1G	0.844687	1.59122	0.476177	3.19087	3	0	0	0.441567	0
Aspartate aminotransferase, cytoplasmic;Aspartate aminotransferase	GOT1;GIG18	-0.316257	0.330451	-0.624644	3.71643	2	0	0	0.442072	0
Mitochondrial import inner membrane translocase subunit Tim21	C18orf55;TIMM21	-0.100372	0.0604682	-0.420378	1.41863	2	0	0	0.442441	0
NADH dehydrogenase [ubiquinone] 1 alpha subcomplex subunit 7	NDUFA7	-0.306787	0.141454	-0.619409	1.87994	2	0	0	0.446019	0
Sorting and assembly machinery component 50 homolog	SAMM50	-0.0222583	0.0200263	-0.352265	1.80716	2	0	0	0.44869	0
Methylcrotonoyl-CoA carboxylase beta chain, mitochondrial	MCCC2	-0.221218	0.178474	-0.543805	2.71551	2	0	0	0.45182	0
Alcohol dehydrogenase [NADP(+)]	HEL-S-165mP;AKR1A1	1.24851	3.76033	0.846548	6.20985	3	0	0	0.454623	0
Peroxisomal multifunctional enzyme type 2;(3R)-hydroxyacyl-CoA dehydrogenase;Enoyl-CoA hydratase 2	HSD17B4	-0.0416816	0.0353084	-0.3768	2.99178	2	0	0	0.455153	0
Stress-70 protein, mitochondrial	HEL-S-124m;HSPA9	0.162238	0.209818	-0.185836	1.36947	2	1	0	0.457591	0
Ryanodine receptor 2	RYR2	0.112729	0.0991702	-0.232777	2.96742	2	1	0	0.457609	0
Striated muscle preferentially expressed protein kinase	SPEG	0.725654	0.305005	0.348123	1.72972	2	0	0	0.457641	0
AP complex subunit beta;AP-2 complex subunit beta	AP2B1;DKFZp781K0743	0.888973	1.86155	0.498382	3.53627	3	0	0	0.462425	0
ATP synthase subunit g, mitochondrial	ATP5L	-0.0926963	0.105666	-0.432066	2.29161	2	0	0	0.462448	0
ADP-ribosylation factor 1;ADP-ribosylation factor 3	ARF1;ARF3	0.76036	2.19702	0.375239	2.02285	3	0	0	0.463738	0
Heterochromatin protein 1-binding protein 3	HP1BP3	0.819403	2.39631	0.42937	1.32695	3	0	0	0.465668	0
X-ray repair cross-complementing protein 5	XRCC5	0.67206	1.85531	0.288021	1.45874	3	0	0	0.467458	0
Mycophenolic acid acyl-glucuronide esterase, mitochondrial	ABHD10	-0.376442	0.203575	-0.706409	3.29351	2	0	0	0.468155	0
Protein disulfide-isomerase TMX3	TMX3	0.824082	1.08014	0.429844	1.99935	2	0	0	0.469847	0
NADH dehydrogenase [ubiquinone] iron-sulfur protein 3, mitochondrial	NDUFS3;DKFZp586K0821	-0.507269	0.58418	-0.832254	4.8239	2	0	0	0.470103	0
Collagen alpha-1(VI) chain	COL6A1	1.36461	1.34767	0.941265	6.66685	3	0	0	0.470784	0
NADH dehydrogenase [ubiquinone] 1 alpha subcomplex subunit 2	NDUFA2	-0.654077	0.586374	-0.974258	5.27555	2	0	0	0.47312	0
Ras-related protein Rab-10	RAB10	0.983599	0.577448	0.576932	2.16615	2	0	0	0.474174	0
Coiled-coil domain-containing protein 58	CCDC58	-0.325343	0.254382	-0.665081	1.97741	2	0	0	0.475649	0
Carbonyl reductase [NADPH] 1	CBR1	0.75007	0.715786	0.351912	1.46091	2	0	0	0.478059	0
NADH dehydrogenase [ubiquinone] 1 alpha subcomplex subunit 8	NDUFA8	-0.247342	0.168468	-0.594407	3.29415	2	0	0	0.479084	0
Lipoamide acyltransferase component of branched-chain alpha-keto acid dehydrogenase complex, mitochondrial	DBT	-0.361327	0.558966	-0.703626	5.07947	2	0	0	0.480333	0
PDZ and LIM domain protein 3	PDLIM3	1.49752	1.22967	1.057	2.85313	2	0	0	0.481587	0
Cytochrome c oxidase subunit 2	COX2;COII;cox2;MT-CO2	-0.104028	0.0601905	-0.464299	2.24085	2	0	0	0.485125	0
Transducin beta-like protein 2	TBL2	1.25315	1.46292	0.817748	2.08701	3	0	0	0.489648	0
Dihydropteridine reductase	QDPR	-0.194618	0.160844	-0.555268	1.97776	2	0	0	0.490514	0
Prohibitin-2	PHB2	0.0995959	0.145982	-0.280265	1.91466	2	1	0	0.494579	0
Agrin;Agrin N-terminal 110 kDa subunit;Agrin C-terminal 110 kDa subunit;Agrin C-terminal 90 kDa fragment;Agrin C-terminal 22 kDa fragment	AGRN	0.75701	1.1818	0.339163	1.73552	2	0	0	0.498449	0
3-ketoacyl-CoA thiolase, peroxisomal	ACAA1	-0.28444	0.273855	-0.648188	3.47112	2	0	0	0.49873	0
1,4-alpha-glucan-branching enzyme	GBE1	0.00283407	0.00247754	-0.379203	2.62856	2	1	0	0.502204	0
NADH-ubiquinone oxidoreductase 75 kDa subunit, mitochondrial	NDUFS1	-0.319722	0.455704	-0.68636	4.50891	2	0	0	0.503722	0
Isocitrate dehydrogenase [NADP], mitochondrial;Isocitrate dehydrogenase [NADP]	IDH2	-0.927025	5.57535	-1.26298	8.14166	3	0	0	0.504798	0
Superoxide dismutase [Cu-Zn]	HEL-S-44;SOD1	-0.175743	0.082406	-0.552788	3.68482	2	0	0	0.506773	0
E3 ubiquitin-protein ligase HUWE1	HUWE1	0.827463	0.580012	0.397918	1.56886	2	0	0	0.506911	0
Adenylosuccinate lyase	ADSL	0.0132781	0.00292784	-0.374502	2.10609	2	1	0	0.507688	0
NADH dehydrogenase [ubiquinone] iron-sulfur protein 6, mitochondrial	NDUFS6	-0.339453	0.226811	-0.709569	2.54155	2	0	0	0.508478	0
Elongation factor Ts, mitochondrial	TSFM	-0.12256	0.0487026	-0.504893	1.58785	2	0	0	0.509423	0
Titin	TTN	-0.812001	3.86647	-1.16224	0.488767	1	0	0	0.513527	0
Core histone macro-H2A.1;Histone H2A	H2AFY	0.536616	1.4695	0.114459	0.285418	1	0	0	0.515136	0
tRNA-splicing ligase RtcB homolog	RTCB	0.627712	1.44559	0.200583	0.745444	1	0	0	0.515365	0
Nebulette	NEBL	0.0109883	0.00450844	-0.384616	1.49966	2	1	0	0.51607	0
Pyruvate dehydrogenase E1 component subunit beta, mitochondrial	PDHB	-0.0839665	0.11066	-0.476457	2.81284	2	0	0	0.518013	0
Isochorismatase domain-containing protein 1	ISOC1	0.748953	1.98023	0.311901	1.11381	1	0	0	0.519157	0
Ubiquitin-like modifier-activating enzyme 1	UBE1;UBA1	0.649526	0.50346	0.215543	1.91607	2	0	0	0.521395	0
40S ribosomal protein S12	RPS12	0.620821	1.68817	0.185457	0.41084	1	0	0	0.524432	0
Electron transfer flavoprotein subunit alpha, mitochondrial	ETFA	-0.137429	0.135423	-0.53378	4.20918	2	0	0	0.525032	0
Isocitrate dehydrogenase [NAD] subunit, mitochondrial;Isocitrate dehydrogenase [NAD] subunit alpha, mitochondrial	IDH3A	0.523196	2.03996	0.0913281	0.352339	1	0	0	0.526121	0
Alpha-aminoadipic semialdehyde dehydrogenase	ALDH7A1	0.0529512	0.0443813	-0.35538	1.9659	2	1	0	0.527186	0
Protein S100-A13	S100A13	1.4416	1.59122	0.957135	2.83581	3	0	0	0.531032	0
Isoleucine--tRNA ligase, mitochondrial	IARS2	0.17947	0.320208	-0.242534	1.61885	2	1	0	0.534644	0
F-actin-capping protein subunit alpha-2	CAPZA2	-0.000292283	0.000412236	-0.412966	2.43165	2	0	0	0.5347	0
Protein-L-isoaspartate O-methyltransferase;Protein-L-isoaspartate(D-aspartate) O-methyltransferase	PCMT1	0.0231347	0.0217735	-0.393257	2.32675	2	1	0	0.537333	0
NADH dehydrogenase [ubiquinone] 1 alpha subcomplex subunit 10, mitochondrial	NDUFA10	-0.0852588	0.0770376	-0.499602	2.35339	2	0	0	0.541142	0
Methionine--tRNA ligase, cytoplasmic	MARS	0.781923	0.516362	0.321245	1.57435	2	0	0	0.542269	0
28S ribosomal protein S22, mitochondrial	MRPS22	0.112897	0.0728531	-0.319754	1.86132	2	1	0	0.549545	0
26S proteasome non-ATPase regulatory subunit 1	PSMD1	0.639879	1.45335	0.176688	0.652037	1	0	0	0.552742	0
Cytochrome b-c1 complex subunit Rieske, mitochondrial;Cytochrome b-c1 complex subunit 11;Putative cytochrome b-c1 complex subunit Rieske-like protein 1	UQCRFS1;UQCRFS1P1	-0.244664	0.218499	-0.665987	4.43396	2	0	0	0.557284	0
Src substrate cortactin	CTTN;EMS1	0.0997607	0.0495132	-0.339894	1.95456	2	1	0	0.557656	0
Splicing factor 3A subunit 1	SF3A1	0.990955	0.756158	0.502902	2.26742	2	0	0	0.559638	0
General vesicular transport factor p115	VDP;USO1	0.862994	1.75985	0.37916	2.44549	3	0	0	0.562235	0
Amine oxidase [flavin-containing] B	MAOB	-0.0430496	0.0308061	-0.479787	3.51035	2	0	0	0.562444	0
Cytochrome c oxidase subunit 4 isoform 1, mitochondrial	COX4I1	-0.0251701	0.0183539	-0.467092	3.93674	2	0	0	0.566929	0
NADH dehydrogenase [ubiquinone] 1 beta subcomplex subunit 4	NDUFB4	-0.0492951	0.0261541	-0.492587	3.53082	2	0	0	0.569704	0
Chloride intracellular channel protein;Chloride intracellular channel protein 4	CLIC4	0.0573938	0.0311185	-0.39272	2.11993	2	1	0	0.571025	0
Ubiquinone biosynthesis monooxygenase COQ6, mitochondrial	COQ6	0.217056	0.138806	-0.244975	1.35815	2	1	0	0.574806	0
Glypican-1;Secreted glypican-1	GPC1	-0.192255	0.149666	-0.635236	3.11182	2	0	0	0.577249	0
Glycogen phosphorylase, muscle form;Alpha-1,4 glucan phosphorylase	PYGM	-0.463956	0.950016	-0.893418	4.50476	2	0	0	0.57795	0
Cystatin-B	CSTB	0.76058	1.44677	0.263749	0.684706	1	0	0	0.581588	0
Proteasome subunit alpha type;Proteasome subunit alpha type-6	PSMA6	0.187067	0.150849	-0.28	1.69056	2	1	0	0.58177	0
Bcl-2-like protein 13	BCL2L13	-0.408662	0.320208	-0.844809	4.66677	2	0	0	0.581957	0
Tropomodulin-1	TMOD1	0.224861	0.261862	-0.245821	1.59274	2	1	0	0.583503	0
Aspartate--tRNA ligase, cytoplasmic	DARS	0.842043	2.41099	0.336759	2.0867	3	0	0	0.58602	0
Myosin light polypeptide 6	MYL6	1.21669	2.39631	0.691518	3.11572	3	0	0	0.586368	0
Succinyl-CoA ligase subunit beta;Succinyl-CoA ligase [ADP-forming] subunit beta, mitochondrial	SUCLA2;DKFZp686D0880	-0.222566	0.363002	-0.675197	4.48672	2	0	0	0.5891	0
Actin-related protein 2/3 complex subunit 2	ARPC2	0.811945	2.63572	0.30527	1.37159	3	0	0	0.589145	0
26S proteasome non-ATPase regulatory subunit 14	PSMD14	0.910926	1.90264	0.399017	1.09531	1	0	0	0.589216	0
UV excision repair protein RAD23 homolog B	RAD23B	0.915235	2.40128	0.398379	1.54913	3	0	0	0.594197	0
Myopalladin	MYPN	0.00214985	0.000800571	-0.467061	1.43731	2	1	0	0.594217	0
Actin, cytoplasmic 2;Actin, cytoplasmic 2, N-terminally processed	ACTG1	0.934049	1.40362	0.415539	3.75568	3	0	0	0.594907	0
Glycogen debranching enzyme;4-alpha-glucanotransferase;Amylo-alpha-1,6-glucosidase	AGL	0.451539	1.34488	-0.0420973	0.0915773	1	1	0	0.595237	0
Carnitine O-acetyltransferase	CRAT	0.124071	0.112702	-0.35306	1.86327	2	1	0	0.595858	0
Actin-related protein 2	ACTR2	0.925331	2.59811	0.405122	1.72045	3	0	0	0.597179	0
Exportin-7	XPO7	1.08139	0.803393	0.552544	1.62767	2	0	0	0.597699	0
Serotransferrin	TF	1.08058	2.08103	0.54874	1.41268	3	0	0	0.600901	0
Annexin A3;Annexin	ANXA3	-0.200459	0.248247	-0.666323	3.33301	2	0	0	0.601844	0
Threonine--tRNA ligase, cytoplasmic	TARS	0.852023	1.37164	0.329334	1.72478	3	0	0	0.603833	0
Proteasome subunit beta type-2;Proteasome subunit beta type	PSMB2	0.804466	1.75985	0.281686	0.800426	1	0	0	0.606549	0
Cytosol aminopeptidase	HEL-S-106;LAP3	0.0855157	0.0559219	-0.399821	3.24268	2	1	0	0.60664	0
Basement membrane-specific heparan sulfate proteoglycan core protein;Endorepellin;LG3 peptide	HSPG2	0.944469	3.92229	0.41369	3.09203	3	0	0	0.607277	0
ATP synthase subunit e, mitochondrial	ATP5I	-0.197879	0.153508	-0.670868	2.10874	2	0	0	0.60922	0
Trifunctional enzyme subunit alpha, mitochondrial;Long-chain enoyl-CoA hydratase;Long chain 3-hydroxyacyl-CoA dehydrogenase	HADHA	-0.155729	0.36184	-0.633907	8.06973	2	0	0	0.612373	0
Enoyl-CoA delta isomerase 2, mitochondrial	ECI2;PECI;HCA64	-0.165727	0.163967	-0.646045	2.88027	2	0	0	0.615182	0
Isocitrate dehydrogenase [NADP];Isocitrate dehydrogenase [NADP] cytoplasmic	HEL-S-26;IDH1;HEL-216	0.715344	1.99922	0.185626	0.404865	1	0	0	0.618777	0
NA	PDIA3	0.966115	0.702157	0.422665	3.46537	2	0	0	0.619455	0
60S ribosomal protein L10a;Ribosomal protein	RPL10A	0.681859	1.87288	0.152931	0.506785	1	0	0	0.619788	0
Vacuolar protein sorting-associated protein 26A	VPS26A	0.826448	0.435528	0.289955	1.36325	2	0	0	0.619807	0
Serine beta-lactamase-like protein LACTB, mitochondrial	LACTB	-0.584203	0.508763	-1.0472	4.40223	2	0	0	0.619948	0
Cullin-3	CUL3	0.861764	0.598625	0.317247	1.5311	2	0	0	0.626327	0
Estradiol 17-beta-dehydrogenase 8	HSD17B8	0.654493	1.5075	0.108605	0.271531	1	0	0	0.639189	0
Vasodilator-stimulated phosphoprotein	VASP	1.08054	1.49074	0.511195	1.33614	3	0	0	0.640477	0
NADH dehydrogenase [ubiquinone] 1 beta subcomplex subunit 9	NDUFB9	-0.0673425	0.0515094	-0.577026	1.69269	2	0	0	0.640746	0
Inter-alpha-trypsin inhibitor heavy chain H1	ITIH1	1.74341	1.07274	1.13879	7.90457	2	0	0	0.641184	0
Serine/threonine-protein phosphatase PGAM5, mitochondrial	PGAM5	-0.0607995	0.0583445	-0.571934	1.79577	2	0	0	0.641916	0
Ribosome maturation protein SBDS	SBDS	0.200623	0.191265	-0.325341	1.33091	2	1	0	0.643164	0
Glutathione S-transferase P	HEL-S-22;GSTP1	0.710181	1.32821	0.156189	0.59757	1	0	0	0.644673	0
ATP synthase subunit d, mitochondrial	ATP5H	-0.00761179	0.00413291	-0.524999	3.62008	2	0	0	0.645584	0
NA	ATAD3A	0.258968	0.225259	-0.274042	2.06226	2	1	0	0.647386	0
Methylglutaconyl-CoA hydratase, mitochondrial	AUH	-0.369273	0.466557	-0.870137	3.36641	2	0	0	0.648069	0
Succinate dehydrogenase [ubiquinone] iron-sulfur subunit, mitochondrial	SDHB	0.0744632	0.0557159	-0.451025	2.39719	2	1	0	0.649611	0
Ubiquitin carboxyl-terminal hydrolase 5	USP5	0.706304	1.50851	0.146856	0.68753	1	0	0	0.650642	0
Nucleolin	NCL	0.93487	1.76033	0.362821	1.80345	3	0	0	0.651349	0
ADP/ATP translocase 1	SLC25A4	-0.0487716	0.0298502	-0.572352	4.24456	2	0	0	0.654385	0
Ribonuclease inhibitor	RNH1	0.872389	2.82033	0.300083	1.40755	3	0	0	0.655062	0
Integrin beta-1-binding protein 2	ITGB1BP2	0.154257	0.0495132	-0.381299	1.9156	2	1	0	0.655838	0
Activator of 90 kDa heat shock protein ATPase homolog 1	AHSA1	0.889735	0.788938	0.312069	1.40732	2	0	0	0.659761	0
Kinectin	KTN1	1.09134	1.92645	0.500844	3.10284	3	0	0	0.662196	0
Plectin	PLEC	-0.42705	1.58502	-0.940873	0.594004	1	0	0	0.664924	0
NADH-ubiquinone oxidoreductase chain 5	ND5;NADH5;ndh5;MT-ND5	1.02858	1.54839	0.42502	0.675063	1	0	0	0.679435	0
BTB/POZ domain-containing protein KCTD12	KCTD12	1.34715	1.48116	0.724208	3.21224	3	0	0	0.682336	0
Importin subunit alpha-3	KPNA4	0.230695	0.111852	-0.337455	1.62852	2	1	0	0.686017	0
Serine/threonine-protein phosphatase;Serine/threonine-protein phosphatase PP1-beta catalytic subunit	HEL-S-80p;PPP1CB	0.82936	1.52842	0.226908	0.727455	1	0	0	0.689237	0
DnaJ homolog subfamily A member 3, mitochondrial	DNAJA3	-0.102312	0.0820844	-0.657635	4.05611	2	0	0	0.690824	0
Heterogeneous nuclear ribonucleoprotein U-like protein 2	HNRNPUL2;HNRNPUL2-BSCL2	0.684466	1.71746	0.0851354	0.145613	1	0	0	0.693925	0
26S proteasome non-ATPase regulatory subunit 5	PSMD5	1.01415	2.52308	0.396105	2.23545	3	0	0	0.695515	0
D-beta-hydroxybutyrate dehydrogenase, mitochondrial	BDH1	-0.566639	0.569319	-1.10249	4.72951	2	0	0	0.695852	0
ATP-dependent (S)-NAD(P)H-hydrate dehydratase	CARKD;FLJ10769	0.0900752	0.0498084	-0.481295	2.41545	2	1	0	0.697161	0
60 kDa heat shock protein, mitochondrial	HSPD1	0.604302	2.97931	0.00486204	0.0227531	1	0	0	0.698455	0
S-(hydroxymethyl)glutathione dehydrogenase;Alcohol dehydrogenase class-3	ADH5	-0.0896171	0.1141	-0.652921	4.99843	2	0	0	0.698546	0
Probable ubiquitin carboxyl-terminal hydrolase FAF-X;Ubiquitin carboxyl-terminal hydrolase	USP9X	0.903045	1.75985	0.284459	1.01167	1	0	0	0.702201	0
Glucose-6-phosphate isomerase	NA	0.0528275	0.0184857	-0.522182	5.63728	2	1	0	0.703051	0
Transmembrane emp24 domain-containing protein 10	TMED10	1.04089	4.29219	0.410849	1.73265	3	0	0	0.706693	0
Pyruvate kinase;Pyruvate kinase PKM	HEL-S-30;PKM;PKM2	0.512598	1.34178	-0.0968011	0.22191	1	1	0	0.714013	0
40S ribosomal protein S3a	RPS3A	0.689392	1.7662	0.0695421	0.37926	1	0	0	0.715302	0
Ras-related protein Rab-9B	RAB9B	0.107407	0.078818	-0.482965	3.49969	2	1	0	0.716254	0
2-methoxy-6-polyprenyl-1,4-benzoquinol methylase, mitochondrial	COQ5	0.322583	0.115284	-0.279575	1.3638	2	1	0	0.716838	0
Cytochrome b-c1 complex subunit 1, mitochondrial	UQCRC1	-0.139015	0.142937	-0.721198	5.68637	2	0	0	0.721185	0
Platelet glycoprotein 4	CD36	0.139654	0.0189928	-0.457349	2.04163	2	1	0	0.721473	0
Myoglobin	MB	-0.31669	0.142937	-0.896481	1.38619	2	0	0	0.728447	0
cAMP-dependent protein kinase type II-beta regulatory subunit	PRKAR2B	1.26757	1.38741	0.600124	1.7154	3	0	0	0.733674	0
Cytochrome c oxidase subunit 5A, mitochondrial	COX5A	0.31559	0.261233	-0.304209	1.59388	2	1	0	0.735836	0
Eukaryotic translation initiation factor 3 subunit C;Eukaryotic translation initiation factor 3 subunit C-like protein	EIF3C;EIF3CL	0.961176	0.804382	0.307268	1.66928	2	0	0	0.736267	0
Short-chain specific acyl-CoA dehydrogenase, mitochondrial	ACADS	-0.0890242	0.0544351	-0.689779	3.95965	2	0	0	0.738027	0
Peroxiredoxin-5, mitochondrial	HEL-S-55;PRDX5	0.401887	1.32849	-0.225292	1.1631	1	1	0	0.738869	0
Transmembrane protein 109	TMEM109	1.17698	2.63295	0.508667	1.10477	1	0	0	0.739578	0
L-lactate dehydrogenase;L-lactate dehydrogenase A chain	HEL-S-133P;LDHA	0.86246	2.52337	0.206411	0.679651	1	0	0	0.743964	0
Annexin;Annexin A1	ANXA1	1.7371	2.41099	1.03538	4.7628	3	0	0	0.743981	0
Aconitate hydratase;Cytoplasmic aconitate hydratase	HEL60;ACO1;IRP1	-0.0548663	0.0353084	-0.665485	6.16719	2	0	0	0.746552	0
Desmoplakin	DSP;DSP variant protein	-0.333058	0.766586	-0.930376	6.51391	2	0	0	0.747841	0
Phosphomevalonate kinase	PMVK	1.21154	1.10249	0.518964	1.55179	2	0	0	0.76328	0
von Willebrand factor A domain-containing protein 8	VWA8	-0.126882	0.111246	-0.752002	3.62211	2	0	0	0.765818	0
E3 SUMO-protein ligase RanBP2	RANBP2	1.19606	0.895551	0.500544	1.42701	2	0	0	0.767229	0
Elongation factor Tu, mitochondrial	TUFM	0.204213	0.539985	-0.444469	4.5506	2	1	0	0.772444	0
Protein NipSnap homolog 2	GBAS	0.331506	0.333161	-0.32402	2.63762	2	1	0	0.772654	0
Cytosolic non-specific dipeptidase	CNDP2	0.392197	0.652595	-0.26731	1.57447	2	1	0	0.773512	0
39S ribosomal protein L55, mitochondrial	MRPL55	-0.384934	0.225259	-1.00673	2.97603	2	0	0	0.776529	0
Glutaredoxin-related protein 5, mitochondrial	GLRX5	-0.0263249	0.00496322	-0.670559	1.70004	2	0	0	0.780448	0
RuvB-like 1	RUVBL1	0.739942	1.90264	0.0554144	0.185158	1	0	0	0.780758	0
39S ribosomal protein L22, mitochondrial	MRPL22	-0.170571	0.0648435	-0.808313	2.53669	2	0	0	0.781543	0
Methylmalonate-semialdehyde dehydrogenase [acylating], mitochondrial	ALDH6A1	0.293971	0.767296	-0.368705	1.40782	2	1	0	0.782265	0
U6 snRNA-associated Sm-like protein LSm4	LSM4	1.07587	1.78591	0.364482	0.370079	1	0	0	0.790594	0
S-formylglutathione hydrolase	ESD	0.782162	1.31378	0.0828489	0.286478	1	0	0	0.794033	0
Phosphate carrier protein, mitochondrial	SLC25A3	0.157126	0.228254	-0.517277	2.92762	2	1	0	0.802174	0
Acyl carrier protein, mitochondrial;Acyl carrier protein	NDUFAB1	-0.395734	0.389419	-1.04138	3.61776	2	0	0	0.802287	0
FACT complex subunit SSRP1	SSRP1	1.25234	1.68805	0.517028	0.616623	1	0	0	0.806117	0
D-dopachrome decarboxylase;D-dopachrome decarboxylase-like protein	DDT;DDTL	0.326255	0.296354	-0.362732	1.86957	2	1	0	0.808248	0
Carnitine O-palmitoyltransferase 2, mitochondrial	CPT2	-0.090089	0.0945345	-0.76046	3.71678	2	0	0	0.811536	0
NA	ATP5J2-PTCD1	0.21429	0.104758	-0.472532	1.67172	2	1	0	0.812129	0
LETM1 and EF-hand domain-containing protein 1, mitochondrial	LETM1	0.149578	0.117914	-0.536808	2.71666	2	1	0	0.815234	0
TBC1 domain family member 4	TBC1D4	0.241031	0.157069	-0.451574	1.51715	2	1	0	0.816758	0
NADH dehydrogenase [ubiquinone] 1 beta subcomplex subunit 3	NDUFB3	0.0776946	0.0576929	-0.611438	4.86398	2	1	0	0.82209	0
Triosephosphate isomerase	HEL-S-49;TPI1	0.453827	1.57459	-0.260433	1.67814	3	1	0	0.827885	0
Histone H1.4	HIST1H1E	0.726862	2.23169	-0.00286399	0.00190224	1	1	0	0.829166	0
2,4-dienoyl-CoA reductase, mitochondrial	DECR1	-0.094595	0.0790106	-0.783553	6.36208	2	0	0	0.831395	0
Integrin beta-1	ITGB1	0.62011	1.8452	-0.107816	0.383098	1	1	0	0.833147	0
Voltage-dependent anion-selective channel protein 2	VDAC2	0.348633	0.800728	-0.372953	2.19656	2	1	0	0.841409	0
Pyruvate kinase	PKM2;PKM	0.640822	3.60265	-0.0968011	0.22191	1	1	0	0.842237	0
Fructosamine-3-kinase	FN3K	-0.222269	0.187449	-0.917322	6.79668	2	0	0	0.844857	0
Cytochrome c1, heme protein, mitochondrial	CYC1	0.100153	0.0860774	-0.614137	4.2083	2	1	0	0.847396	0
Ig kappa chain C region	IGKC	2.83465	1.2754	1.97729	2.33758	2	0	0	0.847747	0
Glutathione S-transferase Mu 2	GSTM2	0.212674	0.19982	-0.50884	3.21548	2	1	0	0.84882	0
Ubiquitin-protein ligase E3A	UBE3A	1.15902	1.793	0.38756	1.18572	1	0	0	0.849396	0
Sarcoplasmic/endoplasmic reticulum calcium ATPase 2	ATP2A2	1.12638	6.59795	0.355907	2.39071	3	0	0	0.850151	0
Hydroxymethylglutaryl-CoA lyase, mitochondrial	HMGCL	0.0872384	0.0528979	-0.629654	1.48516	2	1	0	0.850853	0
Cathepsin B;Cathepsin B light chain;Cathepsin B heavy chain	CTSB	1.06087	4.3658	0.29282	0.606855	1	0	0	0.851209	0
Leucine-rich PPR motif-containing protein, mitochondrial	LRPPRC	0.732662	2.24146	-0.0201768	0.0667065	1	1	0	0.853232	0
NADH dehydrogenase [ubiquinone] 1 alpha subcomplex subunit 12	NDUFA12	0.145824	0.105515	-0.577174	1.46074	2	1	0	0.854069	0
Translocon-associated protein subunit alpha	SSR1	0.734591	1.31378	-0.0226652	0.0345182	1	1	0	0.857787	0
Mitochondrial import inner membrane translocase subunit Tim8 B	TIMM8B	-0.149537	0.0904212	-0.861704	2.1747	2	0	0	0.858908	0
Basal cell adhesion molecule	BCAM;LU	0.622028	1.52945	-0.130958	0.374138	1	1	0	0.859481	0
60S ribosomal protein L30	RPL30	1.09146	1.74331	0.311728	1.14296	1	0	0	0.861845	0
39S ribosomal protein L37, mitochondrial	MRPL37	0.0855941	0.0559219	-0.642869	1.72796	2	1	0	0.863152	0
NADH dehydrogenase [ubiquinone] iron-sulfur protein 5	NDUFS5	-0.203665	0.239591	-0.917302	4.00278	2	0	0	0.86344	0
Talin-2	TLN2	0.342314	0.22155	-0.402573	3.38294	2	1	0	0.866341	0
ATP synthase-coupling factor 6, mitochondrial	ATP5J	-0.0471565	0.0383993	-0.775166	4.16426	2	0	0	0.869985	0
Methylcrotonoyl-CoA carboxylase subunit alpha, mitochondrial	MCCC1;DKFZp686B20267	0.0361915	0.0262682	-0.696298	2.88271	2	1	0	0.870121	0
Eukaryotic translation initiation factor 3 subunit L	EIF3L	1.12418	1.24427	0.328425	2.17448	2	0	0	0.876953	0
Malate dehydrogenase;Malate dehydrogenase, mitochondrial	MDH2	0.359371	0.918379	-0.397434	3.60677	2	1	0	0.877977	0
Guanine nucleotide-binding protein G(i) subunit alpha-2	GNAI2;WUGSC:H_LUCA16.1	0.721824	2.23328	-0.0580781	0.214907	1	1	0	0.882384	0
Citrate lyase subunit beta-like protein, mitochondrial	CLYBL	0.995557	1.62368	0.197002	0.298397	1	0	0	0.886987	0
ATP-binding cassette sub-family B member 7, mitochondrial	ABCB7	0.00273974	0.000537788	-0.744369	4.22812	2	1	0	0.887388	0
Cadherin-2	CDH2	-0.793684	1.0427	-1.50147	8.08258	2	0	0	0.889758	0
Cytochrome c	CYCS	0.453635	0.72819	-0.319613	2.1207	2	1	0	0.890134	0
ATP-dependent 6-phosphofructokinase, platelet type	PFKP	0.372821	0.802439	-0.400893	2.28785	2	1	0	0.895075	0
Large proline-rich protein BAG6	BAT3;BAG6	1.36536	1.16809	0.536399	2.87521	2	0	0	0.898699	0
Histone H2B;Histone H2B type 1-C/E/F/G/I;Histone H2B type 1-K;Histone H2B type F-S	HIST1H2BI;HIST1H2BC;HIST1H2BK;H2BFS	0.678437	1.98185	-0.114715	0.0850228	1	1	0	0.898753	0
Peroxiredoxin-6	HEL-S-128m;PRDX6	0.918589	4.59051	0.106287	0.383591	1	0	0	0.905731	0
60S ribosomal protein L26	RPL26;hCG_26523	0.835203	2.40838	0.024186	0.0422025	1	0	0	0.908968	0
3-mercaptopyruvate sulfurtransferase;Sulfurtransferase	MPST	1.04407	2.5808	0.217744	0.500007	1	0	0	0.913613	0
Sodium/potassium-transporting ATPase subunit beta-1	ATP1B1	0.485146	0.460716	-0.31516	1.36786	2	1	0	0.916946	0
NADH dehydrogenase [ubiquinone] 1 alpha subcomplex subunit 11	NDUFA11	0.00383541	0.0024478	-0.774008	4.82596	2	1	0	0.919754	0
Haloacid dehalogenase-like hydrolase domain-containing protein 3	HDHD3	1.13004	1.44677	0.291543	0.36795	1	0	0	0.92172	0
ATP synthase F(0) complex subunit B1, mitochondrial	ATP5F1;hCG_39985	0.390865	1.09161	-0.416081	2.36865	2	1	0	0.929144	0
Squamous cell carcinoma antigen recognized by T-cells 3	SART3	0.116607	0.0544351	-0.67802	1.46211	2	1	0	0.931252	0
Voltage-dependent anion-selective channel protein 3	VDAC3	0.685159	1.69487	-0.1405	0.491836	1	1	0	0.932679	0
NA	MYL7	4.11943	17.982	3.11441	4.82193	3	0	0	0.932772	0
Cytochrome b-c1 complex subunit 6, mitochondrial	UQCRH	-0.211548	0.199282	-0.990761	5.32178	2	0	0	0.933062	0
Protein kinase C and casein kinase substrate in neurons protein 3	PACSIN3	0.347788	0.481611	-0.462306	2.33899	2	1	0	0.934838	0
NADH dehydrogenase [ubiquinone] 1 beta subcomplex subunit 5, mitochondrial	NDUFB5	0.104164	0.0691454	-0.693979	3.18945	2	1	0	0.935647	0
Pentatricopeptide repeat domain-containing protein 3, mitochondrial	PTCD3	0.279305	0.324179	-0.529427	1.85209	2	1	0	0.937173	0
Complement C3;Complement C3 beta chain;C3-beta-c;Complement C3 alpha chain;C3a anaphylatoxin;Acylation stimulating protein;Complement C3b alpha chain;Complement C3c alpha chain fragment 1;Complement C3dg fragment;Complement C3g fragment;Complement C3d fragment;Complement C3f fragment;Complement C3c alpha chain fragment 2	HEL-S-62p;C3	1.71987	1.68817	0.826684	5.51002	3	0	0	0.946942	0
3-hydroxyisobutyrate dehydrogenase;3-hydroxyisobutyrate dehydrogenase, mitochondrial	HIBADH	0.770641	1.48626	-0.0808851	0.168104	1	1	0	0.955264	0
Voltage-dependent anion-selective channel protein 1	VDAC1	0.45409	1.28813	-0.383475	2.62108	2	1	0	0.957967	0
Ras-related protein Rap-2c	RAP2C	1.40761	2.29666	0.518024	0.904363	1	0	0	0.960336	0
Histone H4	HIST1H4H;HIST1H4A	0.659563	1.34767	-0.196456	0.717998	1	1	0	0.966121	0
Lysocardiolipin acyltransferase 1	LCLAT1	0.0106399	0.00450844	-0.811786	2.43485	2	1	0	0.966418	0
Phosphoglycerate mutase 1;Phosphoglycerate mutase	PGAM1;hCG_2015269	0.777643	2.5808	-0.084863	0.18167	1	1	0	0.966462	0
Heat shock protein 75 kDa, mitochondrial	TRAP1	0.430318	0.472212	-0.414358	1.46987	2	1	0	0.966779	0
Fibrillin-1	FBN1	1.79191	1.89286	0.874287	3.04216	3	0	0	0.968758	0
C-1-tetrahydrofolate synthase, cytoplasmic;Methylenetetrahydrofolate dehydrogenase;Methenyltetrahydrofolate cyclohydrolase;Formyltetrahydrofolate synthetase;C-1-tetrahydrofolate synthase, cytoplasmic, N-terminally processed	MTHFD1	0.384779	0.566259	-0.464881	2.52307	2	1	0	0.974546	0
Thioredoxin	TXN	0.691794	1.82913	-0.176467	0.501835	1	1	0	0.977263	0
Stomatin-like protein 2, mitochondrial	STOML2	0.468159	1.05474	-0.388925	1.75208	2	1	0	0.977786	0
Aldehyde dehydrogenase, mitochondrial	ALDH2	0.927537	3.63486	0.0451152	0.289678	1	0	0	0.97922	0
Glyceraldehyde-3-phosphate dehydrogenase	HEL-S-162eP;GAPDH	0.411486	1.42951	-0.448864	2.95624	3	1	0	0.984354	0
Lon protease homolog, mitochondrial;Lon protease homolog	LONP1	0.0637112	0.0559219	-0.780621	3.53054	2	1	0	0.986607	0
Alkyldihydroxyacetonephosphate synthase, peroxisomal	AGPS	0.274667	0.131292	-0.582047	1.40836	2	1	0	0.988052	0
Histone-lysine N-methyltransferase SMYD1	SMYD1;DKFZp313O0925	0.193353	0.219532	-0.667906	3.6374	2	1	0	0.997327	0
Sialic acid synthase	NANS;HEL-S-100	0.47287	0.469203	-0.407828	1.48616	2	1	0	1.00244	0
ADP/ATP translocase 3;ADP/ATP translocase 3, N-terminally processed	SLC25A6	0.127095	0.153336	-0.737227	2.09119	2	1	0	1.00421	0
39S ribosomal protein L4, mitochondrial	MRPL4	0.135007	0.109748	-0.731151	2.1699	2	1	0	1.00571	0
39S ribosomal protein L2, mitochondrial	MRPL2	0.103777	0.0619725	-0.76099	2.60841	2	1	0	1.00596	0
L-lactate dehydrogenase;L-lactate dehydrogenase B chain	LDHB	-0.0479697	0.0589481	-0.906951	5.17895	2	0	0	1.00821	0
BolA-like protein 2	BOLA2	0.426307	0.583161	-0.458279	1.35516	2	1	0	1.00911	0
Creatine kinase M-type;Creatine kinase M-type, N-terminally processed	CKM	0.330536	0.474042	-0.552194	3.76042	2	1	0	1.01242	0
Calcium-binding mitochondrial carrier protein SCaMC-1	SLC25A24	0.965444	1.74826	0.0478723	0.102514	1	0	0	1.01422	0
Coiled-coil domain-containing protein 141	CCDC141	0.530063	0.804716	-0.367017	1.74759	2	1	0	1.01658	0
Hemopexin	HPX	1.93548	0.606285	0.961303	4.82564	2	0	0	1.02052	0
Junction plakoglobin	JUP	-0.0768945	0.0872063	-0.947481	7.43518	2	0	0	1.02205	0
Alpha-enolase;Enolase	ENO1	0.489925	1.63697	-0.413353	3.52898	3	1	0	1.02533	0
Protein AMBP;Alpha-1-microglobulin;Inter-alpha-trypsin inhibitor light chain;Trypstatin	AMBP	2.05193	0.947935	1.06367	3.39142	2	0	0	1.02897	0
Filamin-B	FLNB;DKFZp686A1668	1.32461	1.32627	0.372099	1.88269	3	0	0	1.0313	0
Annexin;Annexin A2;Putative annexin A2-like protein	HEL-S-270;ANXA2;ANXA2P2	1.51407	3.47593	0.544078	4.72433	3	0	0	1.0393	0
28S ribosomal protein S5, mitochondrial	MRPS5	0.834606	1.34767	-0.100622	0.208166	1	1	0	1.04005	0
39S ribosomal protein L50, mitochondrial	MRPL50	0.174979	0.0846663	-0.730626	1.41646	2	1	0	1.04513	0
NA	DNAJB6	0.255304	0.239303	-0.655399	1.49259	2	1	0	1.04608	0
Sodium/calcium exchanger 1	SLC8A1	0.276055	0.354831	-0.642999	2.35493	2	1	0	1.05375	0
Prolyl endopeptidase	PREP	0.633229	0.964215	-0.3061	2.57712	2	1	0	1.05547	0
NADH dehydrogenase [ubiquinone] 1 beta subcomplex subunit 7	NDUFB7	0.143696	0.11616	-0.770841	2.04909	2	1	0	1.05627	0
Complement component 1 Q subcomponent-binding protein, mitochondrial	C1QBP	0.341803	0.770601	-0.587051	4.33377	2	1	0	1.06047	0
Histone H1.0;Histone H1.0, N-terminally processed	H1F0	0.751795	3.23994	-0.204369	0.473597	1	1	0	1.0667	0
40S ribosomal protein S23	RPS23	0.592176	1.52945	-0.356909	1.2674	1	1	0	1.06802	0
Sulfurtransferase;Thiosulfate sulfurtransferase	TST	0.427424	0.707364	-0.521509	2.29792	2	1	0	1.07694	0
AFG3-like protein 2	AFG3L2	-0.102051	0.0991702	-1.02585	7.12743	2	0	0	1.07958	0
SH3 domain-binding glutamic acid-rich protein	SH3BGR	-0.00974386	0.00292784	-0.939612	4.15993	2	0	0	1.0809	0
39S ribosomal protein L41, mitochondrial	MRPL41	0.267488	0.254382	-0.679429	2.4397	2	1	0	1.08362	0
NADH dehydrogenase [ubiquinone] iron-sulfur protein 7, mitochondrial	NDUFS7	-0.0471809	0.0262682	-0.977902	4.2809	2	0	0	1.08386	0
Inositol monophosphatase 1	IMPA1	0.504493	0.53641	-0.457773	1.9036	2	1	0	1.08676	0
NAD-dependent protein deacylase sirtuin-5, mitochondrial	SIRT5	0.436965	0.510654	-0.525689	1.96477	2	1	0	1.09089	0
Polyribonucleotide nucleotidyltransferase 1, mitochondrial	PNPT1	0.527972	0.324179	-0.441593	1.93317	2	1	0	1.09317	0
Dynactin subunit 3	DCTN3	1.15432	2.24478	0.149809	0.277892	1	0	0	1.09555	0
Inosine-5-monophosphate dehydrogenase 2	IMPDH2	-0.257282	0.175102	-1.19149	1.65874	2	0	0	1.09911	0
Glucose-6-phosphate isomerase	GPI	0.450639	0.623856	-0.522182	5.63728	2	1	0	1.10086	0
NADH dehydrogenase [ubiquinone] 1 beta subcomplex subunit 6	NDUFB6	0.414928	0.493587	-0.557222	2.78376	2	1	0	1.10212	0
UPF0317 protein C14orf159, mitochondrial	C14orf159;C14orf159 variant protein	-0.124983	0.0498084	-1.07977	1.70498	2	0	0	1.11353	0
Tumor protein D54	TPD52L2;DKFZp686A1765	0.926263	2.06537	-0.0848045	0.303192	1	1	0	1.11502	0
Mimecan	OGN	3.07697	1.1818	1.9521	5.07187	2	0	0	1.11664	0
GrpE protein homolog 1, mitochondrial;GrpE protein homolog	GRPEL1	0.111152	0.0604682	-0.862523	4.30305	2	1	0	1.12046	0
Cathepsin D;Cathepsin D light chain;Cathepsin D heavy chain	HEL-S-130P;CTSD	-0.356532	0.357803	-1.31109	3.61593	2	0	0	1.12605	0
tRNA (cytosine(34)-C(5))-methyltransferase	NSUN2	0.338634	0.223172	-0.65391	2.41149	2	1	0	1.12784	0
Protein arginine N-methyltransferase 1	PRMT1;HRMT1L2	1.20722	1.70399	0.165883	0.621808	1	0	0	1.13148	0
Mitochondrial import inner membrane translocase subunit TIM50	TIMM50	0.608072	0.348754	-0.403925	3.35075	2	1	0	1.13353	0
Nuclear ubiquitous casein and cyclin-dependent kinase substrate 1	NUCKS1;NUCKS	0.976693	1.63074	-0.0568892	0.0467151	1	1	0	1.136	0
Vimentin	HEL113;VIM	1.91268	5.24106	0.830197	4.35353	3	0	0	1.13604	0
Ras-related C3 botulinum toxin substrate 1;Ras-related C3 botulinum toxin substrate 3;Ras-related C3 botulinum toxin substrate 2	RAC1;hCG_20693;RAC2;RAC3	0.873315	1.90264	-0.157442	0.502746	1	1	0	1.13871	0
Ubiquitin-conjugating enzyme E2 L3	UBE2L3	0.689787	0.50346	-0.33902	1.54086	2	1	0	1.14676	0
Poly [ADP-ribose] polymerase 1	PARP1	0.445353	1.05582	-0.572906	2.62743	2	1	0	1.14909	0
NADH dehydrogenase [ubiquinone] 1 beta subcomplex subunit 10	NDUFB10	0.44377	0.982656	-0.579352	3.47011	2	1	0	1.15431	0
Glutathione S-transferase omega-1	HEL-S-21;GSTO1	0.869386	2.24365	-0.177727	0.404004	1	1	0	1.15618	0
Delta(3,5)-Delta(2,4)-dienoyl-CoA isomerase, mitochondrial	ECH1	0.00290896	0.00201095	-1.00277	4.3874	2	1	0	1.16019	0
Ribose-phosphate pyrophosphokinase 1	PRPS1	0.508408	0.590099	-0.525234	1.69112	2	1	0	1.16185	0
Collagen alpha-2(I) chain	COL1A2	2.7394	4.47555	1.58799	6.49322	3	0	0	1.16323	0
Cytochrome c oxidase subunit NDUFA4	NDUFA4	0.524462	1.04909	-0.514323	2.49526	2	1	0	1.16639	0
14 kDa phosphohistidine phosphatase	HEL-S-132P;PHPT1;PHP14	0.294329	0.387728	-0.733152	1.75745	2	1	0	1.16714	0
2-oxoisovalerate dehydrogenase subunit alpha, mitochondrial	BCKDHA;DKFZp313C0640	0.305747	0.362043	-0.724614	1.4607	2	1	0	1.16955	0
Glutaryl-CoA dehydrogenase, mitochondrial	GCDH	0.625221	0.66214	-0.430184	1.34653	2	1	0	1.17838	0
Paraplegin	SPG7	-0.127906	0.0888258	-1.148	3.03023	2	0	0	1.18261	0
Mitochondrial pyruvate carrier 2	MPC2;BRP44	0.51484	0.546984	-0.539337	3.15402	2	1	0	1.18316	0
Enoyl-CoA delta isomerase 1, mitochondrial	ECI1;DCI	0.585365	0.974337	-0.474749	1.3065	2	1	0	1.18554	0
Tripeptidyl-peptidase 1	TPP1	0.0916247	0.0535754	-0.946668	3.36016	2	1	0	1.18971	0
NA	CTNNA3	0.00195991	0.000537788	-1.03252	5.69094	2	1	0	1.19063	0
NA	RANBP1	1.17952	2.03996	0.0806516	0.124959	1	0	0	1.19371	0
Propionyl-CoA carboxylase beta chain, mitochondrial	PCCB	0.761387	1.64129	-0.328173	1.92505	3	1	0	1.20692	0
Pyridoxal kinase	HEL-S-1a;PDXK	0.809422	1.02898	-0.292728	1.8712	2	1	0	1.21755	0
Dihydropyrimidinase-related protein 2	DPYSL2	2.05505	10.6851	0.887871	6.64609	3	0	0	1.21756	0
39S ribosomal protein L1, mitochondrial	MRPL1	0.696297	0.808613	-0.406751	1.51247	2	1	0	1.22473	0
NA	SORBS2	-0.410179	0.389419	-1.45857	1.34113	2	0	0	1.228	0
Transforming protein RhoA	RHOA;ARHA	1.3606	1.44277	0.21914	0.415385	1	0	0	1.22867	0
Glutaredoxin-3	GLRX3	1.6843	2.00396	0.52541	1.35752	3	0	0	1.22924	0
Alpha-parvin	PARVA	1.23141	1.61476	0.0961302	0.586527	1	0	0	1.22927	0
Presequence protease, mitochondrial	PITRM1	0.874508	0.394122	-0.24333	1.63197	2	1	0	1.23052	0
Microtubule-associated tumor suppressor candidate 2	MTUS2	0.334834	0.281406	-0.758972	1.43175	2	1	0	1.23489	0
Dual specificity protein phosphatase 3	DUSP3	0.675233	1.32849	-0.438336	1.73855	3	1	0	1.23699	0
Isocitrate dehydrogenase [NAD] subunit gamma, mitochondrial;Isocitrate dehydrogenase [NAD] subunit, mitochondrial	IDH3G;hCG_2004980	0.959637	1.51189	-0.17843	0.728717	1	1	0	1.24718	0
28S ribosomal protein S27, mitochondrial	MRPS27	0.897846	0.952173	-0.239376	1.94249	2	1	0	1.24969	0
MICOS complex subunit MIC27	APOOL;DKFZp779P1227	0.899734	1.32849	-0.244704	1.14325	1	1	0	1.2572	0
Lysosome membrane protein 2	SCARB2	1.11039	2.03552	-0.0480395	0.102583	1	1	0	1.26036	0
NLR family member X1	NLRX1	0.256521	0.186211	-0.860013	4.31501	2	1	0	1.26318	0
Sperm-associated antigen 7	SPAG7	0.365686	0.249749	-0.757984	2.26574	2	1	0	1.2647	0
NEDD8-conjugating enzyme Ubc12	UBE2M	1.40107	1.46292	0.223164	1.1082	1	0	0	1.26489	0
Lysophospholipase-like protein 1	LYPLAL1	0.586876	0.636507	-0.549632	1.62392	2	1	0	1.26606	0
Cytoskeleton-associated protein 5	CKAP5	1.6069	1.26295	0.412257	1.34764	2	0	0	1.27122	0
Coxsackievirus and adenovirus receptor	CXADR	1.5722	1.52842	0.367587	0.255857	1	0	0	1.28365	0
Regulator of microtubule dynamics protein 1	RMDN1	0.496046	0.338562	-0.655912	1.90991	2	1	0	1.28736	0
Leukocyte surface antigen CD47	CD47	2.30736	5.6414	1.04932	2.02066	3	0	0	1.29954	0
Plakophilin-2	PKP2	0.0732328	0.046313	-1.07189	6.81305	2	1	0	1.30344	0
Cytochrome c oxidase subunit 6B1	COX6B1	0.183449	0.0601905	-0.98339	3.10014	2	1	0	1.32028	0
Lamina-associated polypeptide 2, isoforms beta/gamma;Thymopoietin;Thymopentin	TMPO	1.31411	2.52337	0.0807764	0.0642732	1	0	0	1.32817	0
TOM1-like protein 2	TOM1L2	0.694282	0.456016	-0.507505	3.40456	2	1	0	1.32902	0
Phosphoglycolate phosphatase	PGP	0.0321714	0.0168094	-1.14234	5.83598	2	1	0	1.33671	0
5-AMP-activated protein kinase subunit gamma-1	PRKAG1	-0.0820945	0.032879	-1.27148	3.30466	2	0	0	1.35869	0
Complex I assembly factor TIMMDC1, mitochondrial	TIMMDC1	0.509203	0.648693	-0.71315	2.63809	2	1	0	1.36091	0
Cytochrome c oxidase subunit 7C, mitochondrial	COX7C	0.945204	1.34052	-0.301696	0.258867	1	1	0	1.3628	0
28S ribosomal protein S23, mitochondrial	MRPS23	1.01012	1.84237	-0.247045	1.25684	1	1	0	1.37006	0
Proteasome activator complex subunit 2	PSME2	0.606898	0.918379	-0.629435	2.17368	2	1	0	1.37028	0
Serine/threonine-protein phosphatase 2B catalytic subunit alpha isoform;Serine/threonine-protein phosphatase	PPP3CA	1.2686	1.99524	-0.0084309	0.0173239	1	1	0	1.37678	0
DNA fragmentation factor subunit alpha	DFFA	1.78694	1.93342	0.478225	1.35293	3	0	0	1.38166	0
Ribosome-recycling factor, mitochondrial	MRRF	0.340058	0.425097	-0.895074	2.09872	2	1	0	1.38371	0
Hydroxysteroid dehydrogenase-like protein 2	HSDL2	0.0726341	0.0494977	-1.14975	10.1907	2	1	0	1.38499	0
Tryptophan--tRNA ligase, cytoplasmic;T1-TrpRS;T2-TrpRS	WARS	0.517803	0.414753	-0.72931	2.2816	2	1	0	1.38656	0
Adenylate kinase 4, mitochondrial	AK4	0.334264	0.488027	-0.906214	6.53265	2	1	0	1.38967	0
Mitochondrial chaperone BCS1	BCS1L	0.772185	0.800308	-0.502791	2.68703	2	1	0	1.40195	0
Mth938 domain-containing protein	AAMDC	1.11527	1.46292	-0.177645	0.291886	1	1	0	1.40198	0
Mitochondrial import inner membrane translocase subunit TIM44	TIMM44;hTIM44	0.594655	0.49022	-0.677378	2.74507	2	1	0	1.40862	0
Vesicle-associated membrane protein-associated protein A	VAPA	1.37113	1.83339	0.0432341	0.116739	1	0	0	1.4248	0
NAD-dependent malic enzyme, mitochondrial	ME2	1.72423	5.26566	0.360714	0.810072	1	0	0	1.44293	0
39S ribosomal protein L53, mitochondrial	MRPL53	0.403834	0.364247	-0.895223	1.49524	2	1	0	1.44764	0
Septin-9	"SEPT9"	0.984029	1.41457	-0.351679	1.94701	3	1	0	1.45436	0
Cytochrome b-c1 complex subunit 8	UQCRQ	0.743172	0.95496	-0.583825	1.87704	2	1	0	1.45843	0
Basigin	hEMMPRIN;BSG	0.684416	0.884301	-0.64076	3.19932	2	1	0	1.45975	0
Elongation factor G, mitochondrial	GFM1	0.788816	0.67832	-0.544122	3.3347	2	1	0	1.46219	0
2-oxoisovalerate dehydrogenase subunit beta, mitochondrial	BCKDHB	0.208867	0.227588	-1.09992	2.24702	2	1	0	1.46864	0
Microfibrillar-associated protein 2	MFAP2	1.67959	3.84063	0.267092	0.145867	1	0	0	1.49707	0
39S ribosomal protein L40, mitochondrial	MRPL40	0.635564	0.983395	-0.725831	1.83486	2	1	0	1.50065	0
Branched-chain-amino-acid aminotransferase;Branched-chain-amino-acid aminotransferase, mitochondrial	BCAT2	0.486368	0.457083	-0.876707	4.17086	2	1	0	1.51064	0
Mannosyl-oligosaccharide glucosidase	MOGS	1.52681	1.52842	0.103165	0.157887	1	0	0	1.51725	0
O-acetyl-ADP-ribose deacetylase MACROD1	MACROD1	0.534402	0.322265	-0.839518	3.71101	2	1	0	1.51944	0
NADPH--cytochrome P450 reductase	POR;DKFZp686G04235	1.88339	1.41117	0.428956	1.0622	1	0	0	1.53009	0
A-kinase anchor protein SPHKAP	SPHKAP	0.425287	0.305087	-0.958577	2.30876	2	1	0	1.53594	0
Galectin;Galectin-3	hCG_22119;LGALS3	0.931298	2.5808	-0.482854	1.67917	3	1	0	1.54003	0
EMILIN-1	EMILIN1	3.25329	8.01904	1.70483	5.9125	3	0	0	1.55384	0
RNA-binding protein 20	RBM20	0.368464	0.149666	-1.041	1.89304	2	1	0	1.56608	0
Haptoglobin;Haptoglobin alpha chain;Haptoglobin beta chain	HP	2.36747	1.397	0.851135	0.923562	1	0	0	1.56874	0
39S ribosomal protein L11, mitochondrial	MRPL11	0.54551	0.543893	-0.884414	1.76804	2	1	0	1.57792	0
Mitochondrial fission 1 protein	FIS1	0.824155	0.362492	-0.621636	3.35679	2	1	0	1.57931	0
40S ribosomal protein S15a	hCG_1994130;RPS15A	0.434207	1.40072	-0.998647	0.637719	1	1	0	1.58714	0
Paxillin	PXN	0.852326	1.47296	-0.605959	0.943855	1	1	0	1.59094	0
Flap endonuclease 1	FEN1	1.87543	2.15909	0.353562	0.311706	1	0	0	1.60167	0
Alpha-aminoadipic semialdehyde synthase, mitochondrial;Lysine ketoglutarate reductase;Saccharopine dehydrogenase	AASS	0.156176	0.127346	-1.28637	5.00456	2	1	0	1.61268	0
Obg-like ATPase 1	OLA1;PTD004	1.09544	1.32979	-0.404037	2.09841	3	1	0	1.62101	0
NA	DMD	0.614709	1.67807	-0.862888	0.565315	1	1	0	1.6244	0
Oxygen-dependent coproporphyrinogen-III oxidase, mitochondrial	CPOX	0.894435	0.668634	-0.610191	1.90024	2	1	0	1.63752	0
Septin-10	"SEPT10"	1.65819	1.31378	0.102692	0.255143	1	0	0	1.64912	0
39S ribosomal protein L44, mitochondrial	MRPL44	0.360608	0.236605	-1.14803	2.22597	2	1	0	1.67115	0
Serine protease HTRA2, mitochondrial	HTRA2	1.61882	2.5808	0.00745434	0.0129905	1	0	0	1.71024	0
Clusterin;Clusterin beta chain;Clusterin alpha chain;Clusterin	CLU	3.16948	9.27009	1.4382	5.06584	3	0	0	1.75135	0
Neuron navigator 1	NAV1	-0.77562	0.655266	-2.30204	3.27613	2	0	0	1.75248	0
Catenin beta-1	CTNNB1	0.146474	0.142195	-1.43223	5.61629	2	1	0	1.75686	0
PI-PLC X domain-containing protein 3	PLCXD3	0.670738	0.675942	-0.97725	3.19091	2	1	0	1.80109	0
Transmembrane protein 65	TMEM65	0.0115921	0.00413291	-1.62653	6.43331	2	1	0	1.82699	0
Alpha-2-macroglobulin	A2M	2.29961	2.47353	0.511254	1.83999	3	0	0	1.85948	0
NFU1 iron-sulfur cluster scaffold homolog, mitochondrial	NFU1	0.165204	0.153866	-1.51871	5.78761	2	1	0	1.86684	0
Catenin alpha-2	CTNNA2	0.640123	0.465528	-1.06906	2.19731	2	1	0	1.86735	0
Desmoglein-2	DSG2	1.47553	1.32294	-0.355952	1.12448	1	1	0	1.95037	0
Prostaglandin reductase 2	HEL-S-298;PTGR2	1.37276	0.765845	-0.488511	2.39016	2	1	0	1.98746	0
Palladin	PALLD	0.682248	1.60883	-1.14865	1.2667	1	1	0	1.99344	0
ATP-dependent Clp protease ATP-binding subunit clpX-like, mitochondrial	CLPX;DKFZp586J151	1.00811	1.70557	-0.840224	3.92434	3	1	0	1.99389	0
39S ribosomal protein L43, mitochondrial	MRPL43	0.681068	0.560688	-1.15157	2.49456	2	1	0	1.99534	0
