# Supplementary material for: Proteomic mapping of atrial and ventricular heart tissue in patients with aortic valve stenosis
Source: Sci Rep. 2021 Dec 22;11:24389. doi: 10.1038/s41598-021-03907-3 (PMC8695579; doi:10.1038/s41598-021-03907-3)
Supplement: Supplementary file 8 — Supplementary Table 5. [file 41598_2021_3907_MOESM8_ESM.xlsx]

## Sheet: Legend
Supplementary Table 5 - Univariate data analysis of differential protein expression between atrial fibrillation and non-atrial fibrillation

## Sheet: Differential Protein Expression
ProteinName	ProtID	Gene name	logFC (fibrilliation / non-fibrillation)	adj.P.Val
H/ACA ribonucleoprotein complex subunit 4	O60832;C9IYT0;U5UA77	DKC1	1.06721	0.242962
39S ribosomal protein L37, mitochondrial	Q9BZE1;S4R369	MRPL37	0.861346	0.323926
Dynein light chain roadblock-type 1;Dynein light chain roadblock-type 2	B4DFR2;Q9NP97;A0A140VJH9;B1AKR6;Q8TF09	DYNLRB1;DYNLRB2	0.882453	0.323926
Putative transferase CAF17, mitochondrial	Q5T440	IBA57	0.83223	0.323926
EMILIN-2	Q9BXX0	EMILIN2	0.730458	0.323926
28S ribosomal protein S31, mitochondrial	Q92665	MRPS31	1.13718	0.323926
5-AMP-activated protein kinase subunit gamma-1	A0A024R125;P54619;F8VYY9;H0YHF8;H0YIC9	PRKAG1	0.958418	0.323926
Protein LYRIC	A0A024R9D2;Q86UE4;E5RJU9	MTDH	0.812383	0.323926
Sterol-4-alpha-carboxylate 3-dehydrogenase, decarboxylating	Q15738;C9JDR0	NSDHL	1.12793	0.323926
Pre-B-cell leukemia transcription factor-interacting protein 1	B4DV94;B4E1J0;B4E0K4;Q96AQ6	PBXIP1	1.4903	0.323926
Retinal dehydrogenase 1	V9HW83;V9HVX6;P00352;B4DDF8;B4DXX3;Q59EJ0	HEL-S-53e;HEL-9;ALDH1A1	-2.02518	0.323926
Coatomer subunit zeta-1	Q53FU3;A0A024RB72;F8VVA7;P61923;F8VXB1;F8W156;F8W651;F8VYZ4;F8VUC5;F8VXR1	COPZ1	0.909731	0.323926
Eukaryotic translation initiation factor 3 subunit A	J9R021;Q14152;Q24JU4;Q7Z5T5;Q6P1R0	eIF3a;EIF3A	0.852829	0.323926
Histidine-rich glycoprotein	B2R8I2;P04196	HRG	-2.67875	0.349989
39S ribosomal protein L9, mitochondrial	Q9BYD2;Q5SZR1	MRPL9	0.604552	0.373412
Xaa-Pro aminopeptidase 1	Q9NQW7;Q5T6H7;B3KSI7	XPNPEP1	0.845577	0.392562
Collagen alpha-1(I) chain	P02452;Q6LAN8;H9C5C5	COL1A1	-1.01532	0.400714
Cytochrome c oxidase subunit 7C, mitochondrial	P15954;D6R9Z7;Q71U45	COX7C	0.822422	0.41537
Serine/arginine-rich splicing factor 6	Q59GY3;A8K588;Q13247;V9HVZ0	SRSF6;HEL-S-91	0.86004	0.41537
Pre-mRNA-processing factor 6	O94906	PRPF6	0.82863	0.41537
Lysosomal Pro-X carboxypeptidase	A0A024R5L0;P42785;B7Z7Q6;E9PQB5;E9PL85;E9PQN3;E9PKN6;E9PIG4	PRCP	0.912474	0.438952
Caprin-1	G3V153;B3KXU8;Q14444;E9PLA9;B4DSF8	CAPRIN1	1.44237	0.463883
Acylglycerol kinase, mitochondrial	E9PC15;B4E2Z8;A4D1U5;Q53H12;E9PG39;B4DR72	AGK;FLJ10842	0.527168	0.46542
Eukaryotic translation initiation factor 3 subunit L	B0QY89;Q9Y262;B4DQF6;B3KPB9;B0QY90;B3KNG0	EIF3L	1.09146	0.476954
Succinyl-CoA ligase [ADP/GDP-forming] subunit alpha, mitochondrial	Q6IAL5;A8K4W7;P53597;B2R8A1;B7Z438	SUCLG1	0.506249	0.476954
NA	Q7Z3B7	DKFZp451N061	0.657704	0.48469
Aconitate hydratase;Cytoplasmic aconitate hydratase	V9HWB7;P21399;Q9HBB2;Q59FI0	HEL60;ACO1;IRP1	0.55767	0.493169
N(G),N(G)-dimethylarginine dimethylaminohydrolase 1	B1AKK2;O94760;B4E3V1;B4DYP1;B4DGT0	DDAH1	-0.639044	0.493169
Ras-related protein Rab-2A	A0A024R7V6;P61019;A0A0A1HAW1;E9PKL7	RAB2;RAB2A	0.423253	0.498656
AFG3-like protein 2	D3DUJ0;Q8TA92;Q9Y4W6	AFG3L2	0.441628	0.520991
Apoptosis inhibitor 5	G3V1C3;Q9BZZ5;B4DDR3;H0YER7	API5	0.710501	0.521329
Cell cycle and apoptosis regulator protein 2	B3KTJ9;Q8N163;H0YB24;G3V119;E2PSM9	CCAR2	0.945371	0.521329
Myelin expression factor 2	A0A0A0MQW0;A0A0A0MR39;A0A087WUT0;Q9P2K5;A0A024R5Q6	MYEF2	-0.645451	0.521329
Thioredoxin-like protein 1	V9HW51;B2R960;O43396;Q59G46;K7ER96	HEL-S-114;TXNL1	0.672941	0.521329
Alanine--tRNA ligase, mitochondrial	Q5JTZ9	AARS2	0.673015	0.521329
Biglycan	A6NLG9;B4DDQ2;Q53FI4;A8K7E0;P21810;B3KS75;Q53HU6;Q8NAB7;B4DNL4;B4DQD6;B4DDN7	BGN	0.726252	0.521329
Reticulon-4	Q9NQC3;Q53RF4	RTN4	-1.11528	0.521329
Sorting nexin-3	O60493	SNX3	1.20266	0.521329
26S proteasome non-ATPase regulatory subunit 7	B2RD27;P51665;B4DXI8;H3BNT7;H3BTM8	PSMD7	0.635627	0.521329
ADP-ribosylation factor-like protein 3	P36405	ARL3	0.596198	0.521329
Striatin	O43815;Q3B874	STRN	1.00486	0.521329
Carbonyl reductase family member 4	Q8N4T8;H0Y962	CBR4	0.666489	0.521329
DNA topoisomerase 2-beta;DNA topoisomerase 2	Q02880;Q71UH4;B4DKD0;E9PCY5;Q59H80	TOP2B	0.616469	0.521329
Cathepsin Z	Q5U000;Q9UBR2	CTSZ	0.583374	0.521329
Polypyrimidine tract-binding protein 2	Q9UKA9;B4DSU5;B4DSS8	PTBP2	1.29939	0.521329
Desmoglein-2	Q14126	DSG2	1.22379	0.521329
Single-stranded DNA-binding protein;Single-stranded DNA-binding protein, mitochondrial	Q567R6;A4D1U3;Q04837;A0A0G2JLD8;E7EUY5;B7Z268;C9K0U8	SSBP1	0.366136	0.521329
Dynein light chain Tctex-type 1	P63172;Q5VTU3	DYNLT1	0.71929	0.521329
Myosin-6	P13533	MYH6	-0.864921	0.521329
Aldose 1-epimerase	Q96C23;Q12915;H7C320;B8ZZ75	GALM;Ibd1	0.642644	0.521329
Glutaminase kidney isoform, mitochondrial	A8K132;O94925;Q53TX0	GLS	0.610385	0.521329
AP complex subunit beta;AP-2 complex subunit beta	A8K916;A0A140VJE8;P63010;H0UID5;H0UID4;H0UID3;A8K0G3;Q68DI0;A0A087X253;B4DWG4;A0A087WU93;A0A087WZQ6;B4E261;A0A087WYD1;Q96EL6	AP2B1;DKFZp781K0743	0.513312	0.521329
Lysophospholipase-like protein 1	Q5VWZ2	LYPLAL1	-0.582112	0.521329
Pre-mRNA-splicing factor ATP-dependent RNA helicase DHX15	B4E0S6;O43143	DHX15	0.531452	0.521329
Cytochrome c oxidase subunit 5B, mitochondrial	P10606;Q6FHM4;Q6FHJ9	COX5B	0.623898	0.521329
Ubiquitin-conjugating enzyme E2 N	V9HW41;P61088;F8VSD4;F8VV71;F8VZ29	HEL-S-71;UBE2N	-0.478216	0.521329
Serine/threonine-protein phosphatase 2A 65 kDa regulatory subunit A alpha isoform	A8K7B7;P30153;B4DDF7;A8K3H8;B4DE69;B4DQY1;Q8NB89;B3KQV6;C9J9C1	PPP2R1A	0.463503	0.521329
Heterogeneous nuclear ribonucleoprotein A0	Q13151	HNRNPA0	0.573271	0.521329
S-phase kinase-associated protein 1	E5RJR5;P63208;E7ERH2;F8W8N3	SKP1	-1.13028	0.521329
Rho GDP-dissociation inhibitor 1	J3KTF8;V9HWE8;J3QQX2;P52565;J3KRE2;J3QW41;A0A0S2Z3D9;J3KRY1	ARHGDIA;HEL-S-47e	1.02661	0.521329
Nuclear receptor-binding protein	B4DW31;Q9UHY1;F8W6G1	NRBP1	0.667866	0.521329
DNA damage-binding protein 1	Q16531;F5GY55;B7Z2A1;B4DSA8;B4DZP5	DDB1	0.500774	0.521329
Eukaryotic translation initiation factor 4E	Q32Q75;X5D7E3;D6RBW1;P06730	EIF4E	2.24626	0.521329
Cell division cycle and apoptosis regulator protein 1	Q8IX12;A0A0C4DGG8;F5H2E6;F5H1H2;F5H3E1	CCAR1	1.50539	0.521329
Adenylosuccinate lyase	A0A1B0GWJ0;A0A1B0GTJ7;X5D8S6;P30566;Q71UA4;X5DP48;X5D2Z4;A0A1B0GTG9;A0A1B0GWF8;B4DP46;A0A0A6YY92;A8K4X6;A0A096LNY6;A0A096LNY5;B4DUM2	ADSL	-0.772036	0.521329
NA	A0A0A6YYJ8;B3KRR1	LUC7L2	0.760616	0.521329
Tropomyosin alpha-1 chain	A0A0S2Z4G6;D9YZV4;P09493;H0YL52	TPM1	-0.565601	0.521329
UDP-glucose:glycoprotein glucosyltransferase 1	A8KAK1;Q9NYU2	UGGT1	0.843952	0.521329
Poly(U)-binding-splicing factor PUF60	A0A0J9YYL3;A0A0J9YVP6;A0A0J9YXJ8;A0A0J9YXX5;Q9UHX1;A0A0J9YVR6;E9PQ56;A0A0J9YWM1;H0YEM1	PUF60	1.04984	0.521329
Uveal autoantigen with coiled-coil domains and ankyrin repeats	H0YNH8;B7ZKM6;Q9BZF9;F5H2B9;B7ZKM7	UACA	0.762953	0.521329
Sorbitol dehydrogenase	V9HW89;Q00796;H0YLA4;B4DKI2	HEL-S-95n;SORD	0.639701	0.521329
Coatomer subunit alpha;Xenin;Proxenin	P53621	COPA	0.572276	0.521329
Heat shock 70 kDa protein 6;Putative heat shock 70 kDa protein 7	Q53FC7;B2R6X5;P17066;B3KSM6;P48741	HSPA6;HSPA7	-0.58839	0.521329
Mitogen-activated protein kinase kinase kinase MLT	D4Q8H0;A8K710;B4DQ47;Q9NYL2	pk;ZAK	1.10373	0.521329
Neuroplastin	Q9UFM8;Q9Y639;Q9Y499	DKFZp566H1924;NPTN	0.580569	0.521329
NA	B7Z992;B7Z2X4	NA	0.408663	0.521329
Proteasome subunit alpha type;Proteasome subunit alpha type-6	A0A140VK44;G3V5Z7;P60900;G3V295;G3V3I1	PSMA6	0.55012	0.521329
BUB3-interacting and GLEBS motif-containing protein ZNF207	X6R4W8;J3QRS9;Q59G94;O43670	ZNF207	1.07631	0.521329
Fatty aldehyde dehydrogenase	P51648;J3QRD1;Q59H65;Q68D64;I3L1M4	ALDH3A2;DKFZp686E23276	0.585927	0.521329
RNA-binding protein 39	B4DRA0;Q68DD9;B4E1M7;Q14498;B4DLM0;B3KWX7;B7Z4L7;Q6N037;E1P5S2;Q7Z3L0;Q6MZY7;G3XAC6;A0A0U1RQH7;H0Y4X3	DKFZp781C0423;RBM39;DKFZp686A11192;RNPC2;DKFZp781I1140;DKFZp686C17209	0.667058	0.521329
Fragile X mental retardation protein 1	R9WQY1;A8MQB8;G3V0J0;X5D907;R9WPL0;A0A087WXI3;X5DQX7;Q06787;R9WNI0;W5ZQ92;Q59GC1;A0A0K0MJ24;Q8IXW7	FMR1	0.650288	0.521329
Double-strand break repair protein MRE11A	F8W7U8;A0A024R395;P49959;Q05D78	MRE11A	0.574139	0.521329
Ubiquitin-like modifier-activating enzyme 6	A0A024RDB0;A0AVT1;B3KSS1	UBE1L2;UBA6	0.580355	0.521329
40S ribosomal protein S24	E7ETK0;A0A087WUS0;P62847	RPS24	0.697729	0.521329
PC4 and SFRS1-interacting protein	O75475;Q05CM9	PSIP1	0.955867	0.521329
NEDD8-activating enzyme E1 catalytic subunit	B2RBP3;Q8TBC4;J3JZZ9;F8W8D4;B7Z5F6	UBA3;UBE1C	1.3374	0.521329
Atypical kinase ADCK3, mitochondrial	A0A024R3S3;Q8NI60;B4DVB7;A1L377;Q5T7A2;B4DED1;B4DN23	CABC1;ADCK3	0.327357	0.521329
60S ribosomal protein L22	Q7Z4W8;P35268;K7EP65;K7EKS7;K7ELC4;K7EMH1;K7ERI7;K7EJT5	RPL22	0.597821	0.521329
Cullin-5	Q93034;L0L6C1	CUL5	0.738755	0.521329
WD40 repeat-containing protein SMU1;WD40 repeat-containing protein SMU1, N-terminally processed	A0MNN4;Q2TAY7	SMU1	0.37427	0.521329
Muscle-related coiled-coil protein	Q5BKX8	MURC	0.405135	0.521329
Valine--tRNA ligase	A0A024RCN6;P26640;A0A140T936	VARS	0.629558	0.521329
COP9 signalosome complex subunit 6	B2R514;E7EM64;Q7L5N1	COPS6	0.632416	0.521329
Peptidyl-prolyl cis-trans isomerase FKBP8	B2R8G6;A0A024R7P2;Q14318;B7Z6M0;U3KQ64;A0A0A0MTJ1	FKBP8	0.915636	0.521329
Transmembrane protein 205	K7ELQ9;A0A024R7D3;Q6UW68;K7ER05;K7EJQ9;K7EM09;K7EPR0	TMEM205;UNQ501	0.929809	0.521329
Protein mago nashi homolog	P61326	MAGOH	0.680936	0.521329
Peptidyl-prolyl cis-trans isomerase;Peptidyl-prolyl cis-trans isomerase FKBP3	Q53GD8;Q00688	FKBP3	0.479119	0.521329
26S protease regulatory subunit 10B	V9HW24;A0A087X2I1;P62333	HEL-S-73;PSMC6	0.500742	0.521329
Transcription factor A, mitochondrial	Q6LES8;E5KSX8;E5KSU5;Q00059;H7BYN3	TFAM	-0.440711	0.521329
Natriuretic peptides A;Atrial natriuretic factor	A0A087X094;P01160	NPPA	1.9422	0.526497
5-nucleotidase domain-containing protein 2	Q9H857	NT5DC2	0.458948	0.526497
Zinc-binding alcohol dehydrogenase domain-containing protein 2	Q8N4Q0;Q4G1C4	ZADH2	0.625661	0.527516
Src substrate cortactin	A0A024R5M3;Q14247;Q53HG7;Q76MU0	CTTN;EMS1	0.511662	0.530974
Vitamin K-dependent protein S	Q9NSD0;Q16519;A0A0S2Z4K3;A0A0S2Z4L3;P07225;G5E9F8;B4E1L6	PROS1	0.722408	0.530974
Spectrin beta chain, non-erythrocytic 1	B2ZZ89;Q01082;A0A087WUZ3;D6W5C0;K9MS24	SPTBN1	-0.30793	0.530974
CD109 antigen	Q6YHK3	CD109	0.640369	0.530974
Coatomer subunit gamma-2;Coatomer subunit gamma	A0A140VK12;Q9UBF2;Q9H9B7;Q9NUP3	COPG2	0.506688	0.530974
Receptor protein-tyrosine kinase;Receptor tyrosine-protein kinase erbB-2	X5DNK3;P04626;B4DTR1;J3QLU9	ERBB2	0.536211	0.530974
Kelch-like protein 41	O60662;B2RE63;Q3ZTS6	KLHL41;SARCOSIN	0.84341	0.530974
Microtubule-associated tumor suppressor candidate 2	J3KQA9;Q5JR59;B4DYN0	MTUS2	0.595879	0.530974
Chromobox protein homolog 3	A4D177;Q13185	CBX3	0.713053	0.530974
Perilipin;Perilipin-2	B4DJK9;Q6FHZ7;Q99541;B4DNH6	ADFP;PLIN2	1.1126	0.530974
Protein lin-7 homolog C	Q53FX5;Q9NUP9;G3V1D4	LIN7C	1.02102	0.530974
Tyrosine-protein phosphatase non-receptor type substrate 1;Signal-regulatory protein beta-1 isoform 3	P78324;B4DP97;D3DVW9;Q5TFQ8	SIRPA;PTPNS1;SIRPB1	-0.54984	0.530974
Small nuclear ribonucleoprotein Sm D2	P62316;K7ERG4	SNRPD2	0.428986	0.530974
Phosphofurin acidic cluster sorting protein 1	A0A024R5H6;Q6VY07;B4DF77	PACS1	0.516303	0.530974
Phosphatidylinositide phosphatase SAC1	Q9NTJ5;E9PGZ4;B4DVV3	SACM1L	0.730852	0.530974
Mitochondrial 2-oxoglutarate/malate carrier protein	I3L1P8;Q6IBH0;Q02978	SLC25A11	-0.36171	0.533847
E3 ubiquitin-protein ligase UBR4	Q5T4S7	UBR4	0.713298	0.533847
Estradiol 17-beta-dehydrogenase 8	Q92506	HSD17B8	-0.313657	0.533847
NA	D3DTX7	COL1A1	-0.624406	0.534477
Calpain small subunit 1	A0A0C4DGQ5;P04632;K7ELJ7;K7EM73;K7EIV0;A0A075B7C0;U3KQE2;K7EKD8	CAPNS1	0.733966	0.534477
NA	F6WQW2;C9JDM3	RANBP1	0.553804	0.534477
Phenylalanine--tRNA ligase beta subunit	Q9BR63;Q9NSD9;A8K666;B7ZB32	FARSB	0.529923	0.534477
Calcium-binding mitochondrial carrier protein Aralar2	Q53GR7;Q9UJS0;B7Z2E2	SLC25A13	0.451415	0.534477
Sperm-associated antigen 7	O75391;I3L0X5	SPAG7	0.622838	0.534477
Tumor protein D54	A0A087WYR3;Q68E05;Q6FGS1;O43399;Q53GA0;A0A087WZ51;Q5J908	TPD52L2;DKFZp686A1765	0.501453	0.534477
40S ribosomal protein S7	P62081;B5MCP9	RPS7	0.389108	0.534549
Mitochondrial-processing peptidase subunit alpha	Q10713	PMPCA	0.44263	0.543227
Calsequestrin-2;Calsequestrin	O14958;B4DEF0	CASQ2	-0.980337	0.544326
SPRY domain-containing protein 4	Q8WW59;B4DUC9	SPRYD4	0.508561	0.547379
Ras-related protein Rab-7a	A0A158RFU6;P51149;C9J8S3;C9J4V0;C9J4S4;C9J592	RAB7A	-0.579324	0.549258
Hepatoma-derived growth factor	P51858;B2RDE8;A8K8G0;B7Z958;B7Z525	HDGF	0.744433	0.549258
DNA helicase;DNA replication licensing factor MCM2	B3KXZ4;P49736;B7Z8Z6;H0Y8E6;B4DSV5;Q9BWF4	MCM2	0.950966	0.549258
Sodium/potassium-transporting ATPase subunit beta-1	Q6LEU2;A3KLL5;P05026;A6NGH2	ATP1B1	0.464533	0.549258
Flavin reductase (NADPH)	V9HWI1;P30043;M0R192;M0QZL1	HEL-S-10;BLVRB	-0.382147	0.549258
COP9 signalosome complex subunit 2	Q53HJ0;Q59EL2;P61201;B2R6N0;B4DIH5;H0YKU5	COPS2	0.626811	0.549258
Protein FAM49B	A0A024R9G4;Q9NUQ9;Q68D08	FAM49B;DKFZp686B04128	0.947089	0.549258
Apolipoprotein O	H7C1U8;Q9BUR5;G3V1B6	APOO	0.535483	0.549258
Alpha/beta hydrolase domain-containing protein 11	Q8NFV4;D3DXF2	ABHD11	0.47762	0.549258
Histone H1.3	P16402	HIST1H1D	0.442731	0.549258
Ubiquitin-conjugating enzyme E2 K	B4DIZ2;P61086;D6RDM7	UBE2K	0.798028	0.549258
SEC23-interacting protein	B4DWG1;B3KM47;Q9Y6Y8;B3KN10	SEC23IP	-0.681454	0.549258
FACT complex subunit SSRP1	A0A024R4Z6;Q08945	SSRP1	0.585103	0.549258
Galactokinase	V9HWE7;P51570;Q6ZP37;Q71UH7;K7ERJ9;B4E1A8	HEL-S-19;GALK1	0.458831	0.549258
Enoyl-CoA hydratase domain-containing protein 3, mitochondrial	A0A140VKF9;Q96DC8;Q5W0J8	ECHDC3	0.484877	0.549376
Pterin-4-alpha-carbinolamine dehydratase	P61457;Q6FGB3;Q6LEE2	PCBD1;PCBD	0.749451	0.555146
Alpha-mannosidase;Lysosomal alpha-mannosidase;Lysosomal alpha-mannosidase A peptide;Lysosomal alpha-mannosidase B peptide;Lysosomal alpha-mannosidase C peptide;Lysosomal alpha-mannosidase D peptide;Lysosomal alpha-mannosidase E peptide	B4E0K9;Q59E90;A8K6A7;O00754	MAN2B1	-0.849238	0.555146
Transmembrane protein 65	Q6PI78	TMEM65	0.709709	0.555146
NADH-ubiquinone oxidoreductase chain 5	Q5S9U8;A0A1B0W1F8;A0A075X6P1;Q53ZV6;H9A7H1;D7P652;D7P639;D7P626;B8X5X6;B2XIN1;A0A059RIX9;A0A023REG7;A0A023QG09;X5CM76;X5CKG0;X5CI32;X5CF88;X5CBQ3;X5BYA7;X5BWL7;X5BWF0;X5BVZ3;X5BVA2;X5BV52;X5BPC3;X2JJ49;W8DRA6;W8DIL7;W8DCA6;W8DBU7;W8DBM7;W8DAS2;W8D9V0;W8D9F9;W8D8R1;W0C6Q7;W0C3F1;V9PAU1;V9PAR5;V9PA42;V9NA48;V9N990;V9N6Q0;V9N6J1;V9N5T7;V9N4K8;V9M765;V9K141;V9JYL6;V9JXJ3;V9JTH7;V9JMS4;V9JLL5;V9JJF5;V…	ND5;NADH5;ndh5;MT-ND5	0.477617	0.555146
Alkyldihydroxyacetonephosphate synthase, peroxisomal	O00116;B7Z3Q4;A0A1B0GWA2	AGPS	0.774662	0.555146
Succinate dehydrogenase [ubiquinone] cytochrome b small subunit, mitochondrial	Q6UWH2;A0A0S2Z4J3;O14521;H0YD96;H0YD41;G3V173;E9PK73;H3BRW5	UNQ5809;SDHD	0.434254	0.555146
Tyrosine-protein kinase receptor;Protein TFG	Q05BK6;Q7Z426;Q8TDJ5;Q92734;C9JJP5;C9JUE0;C9JTY3;Q7Z427	TFG;TFG/ALK fusion	0.419416	0.555146
Aminomethyltransferase;Aminomethyltransferase, mitochondrial	A0A024R2U7;P48728;B3KRJ7;A0A1B0GTM2;A0A1B0GWC4;A0A1B0GVP5;B3KTU4;A0A1B0GTA8;H0Y695;A0A1B0GUU7;B4DGG9;A0A1B0GTV8;A0A1B0GUH1;Q49A62	hCG_2001997;AMT	0.597999	0.555146
Eukaryotic translation initiation factor 3 subunit D	O15371;B4E1K8	EIF3D	0.613375	0.555146
Fructose-bisphosphate aldolase;Fructose-bisphosphate aldolase C	A0A024QZ64;P09972;B7Z3K9;B7Z1Y2;B7Z1N6;A8MVZ9;B7Z3K7;J3KSV6;J3QKP5;C9J8F3	ALDOC	-1.02622	0.555146
Ras-related protein Rab-5C	A0A024R1U4;P51148;K7ERI8;F8VVK3;K7ENY4	RAB5C	1.11461	0.555146
Enhancer of rudimentary homolog	A0A024R6D4;P84090;G3V279	ERH	0.866886	0.555146
Minor histocompatibility antigen H13	A0A0S2Z5V7;Q8TCT9;A0A075B6F6;A0A0S2Z6F0	HM13	0.849989	0.555146
Ubiquitin carboxyl-terminal hydrolase;Ubiquitin carboxyl-terminal hydrolase 7	Q6U8A4;Q93009;B7Z855;B7ZAX6;H3BND8;B7Z7T5	USP7	-0.946977	0.555146
Copine-1	F2Z2V0;Q99829;A6PVH9;E7ENH5;B0QZ18;Q5JX58;Q5JX59;Q5JX60;Q5JX44;Q5JX55;Q5JX56;Q5JX45;Q59EI4;Q5JX54;Q5JX61;Q5JX52	CPNE1	0.550349	0.555146
General vesicular transport factor p115	A0A024RDG1;O60763	VDP;USO1	0.351465	0.557549
Proteasome subunit beta type-4	A0A140VK46;P28070;B4DFL3	PSMB4	0.534721	0.558817
NA	A0A024R884;Q4LE33	TNC;TNC variant protein	-0.857402	0.558817
Mitochondrial-processing peptidase subunit beta	Q96CP5;B3KM34;O75439;A8K1E9;G3V0E4;B4DM90;Q9UG64;B3KQ85	PMPCB;DKFZp586I1223	0.384485	0.558817
Translation initiation factor eIF-2B subunit epsilon	Q13144;H7C2X0;C9JRD9;Q59HD8	EIF2B5	-0.492871	0.558817
Transportin-1	A0A024RAM0;Q92973	TNPO1	0.501687	0.558817
Adenylate kinase 2, mitochondrial;Adenylate kinase 2, mitochondrial;Adenylate kinase 2, mitochondrial, N-terminally processed	F8W1A4;A0A140VK93;P54819;F8VZG5;B4DLK2;F8VY04;G3V213	AK2	-0.394802	0.558817
Ribose-phosphate pyrophosphokinase 1	Q53FW2;P60891;B1ALA9;B7ZB02	PRPS1	0.586507	0.558817
EH domain-containing protein 4	A8K9B9;A0A024R9N6;Q9H223	EHD4	0.500167	0.558817
EH domain-containing protein 3	Q9NZN3	EHD3	0.305227	0.558817
Calcium-binding mitochondrial carrier protein SCaMC-1	Q6NUK1;B7ZB41;B4E290	SLC25A24	0.536064	0.558817
Hepatoma-derived growth factor-related protein 3	A0A024R216;Q9Y3E1	HDGFRP3	0.630186	0.558817
Beta-enolase;Enolase	P13929;E5RGZ4	ENO3	-0.371352	0.560069
MAPK-interacting and spindle-stabilizing protein-like	Q8NDC0	MAPK1IP1L	0.554173	0.560069
Integrin beta-1-binding protein 2	Q9UKP3	ITGB1BP2	-0.879183	0.560069
GTP-binding protein SAR1a	Q5SQT9;Q9NR31;Q8NG23;B2R679;Q6FID4;Q5SQT8	SAR1A;SARA1	0.731521	0.56225
Sodium/calcium exchanger 1	P32418;E7EV41	SLC8A1	0.426339	0.56225
TAR DNA-binding protein 43	A0A0A0N0L3;A0A024R4E2;Q13148;A0A087WX29;B1AKP7;G3V162;A0A087X260;A0A087WYY0;K7EJM5;A0A0A0N0N3;A0A0A0N0M3;B4DRW3;A0A087WXQ5;A0A087WV68	TDP43;TARDBP	0.721589	0.56225
Treacle protein	Q13428;Q59FZ2	TCOF1	0.473693	0.56225
UBX domain-containing protein 1	E9PJ81;E9PRQ7;A0A024R598;A0A024R539;Q04323;B4E0P8;Q05BV2;B4DNC6;A0A087WTZ5	UBXN1;LOC51035	0.371677	0.56225
Annexin;Annexin A4	V9HW59;Q6LES2;P09525;Q6P452;B4DDZ4;B4DE02;Q59FK3	HEL-S-274;ANXA4	0.691288	0.56225
Nucleoprotein TPR	P12270	TPR	0.554042	0.56225
Protein kinase C delta-binding protein	Q969G5;E9PIE3	PRKCDBP	0.580823	0.56225
Serine/threonine-protein kinase WNK1	D3DUP2;F5GWT4;D3DUP1;Q9H4A3;A5D8Z4	WNK1	0.73907	0.56225
Unconventional myosin-Ic	O00159;F5H6E2;B7Z3E5	MYO1C	0.368995	0.56225
Peroxiredoxin-1	Q06830;B2R4P2	PRDX1	-0.306002	0.56225
Glutathione peroxidase;Phospholipid hydroperoxide glutathione peroxidase, mitochondrial	K7ERP4;A0A087X2I2;A0A087WT12;P36969;Q6PI42;K7EJ20;K7EKX7;R4GNE4;K7ENB4	GPX4	0.452236	0.56225
Lamina-associated polypeptide 2, isoform alpha;Thymopoietin;Thymopentin	P42166	TMPO	-0.340872	0.56225
5-oxoprolinase	A7E261;O14841	OPLAH	0.432156	0.56225
Ubiquinone biosynthesis monooxygenase COQ6, mitochondrial	Q9Y2Z9;A0A0D9SFJ1	COQ6	0.544962	0.56225
Collagen alpha-2(I) chain	A0A087WTA8;A0A0S2Z3H5;P08123	COL1A2	-0.713429	0.56225
Carnitine O-palmitoyltransferase 1, muscle isoform	A8K5K1;A5PLL0;A0A024R4W7;Q92523;Q53FV7;A2RRE8	CPT1B;hCG_2044796	-1.04822	0.56225
UPF0568 protein C14orf166	Q5RLJ0;Q549M8;Q9Y224;G3V4C6;H0YJB9	C14orf166	0.497854	0.56225
RNA-binding protein 4;RNA-binding protein 4B	Q9BWF3;E9PB51;A8K9U0;Q9BQ04;D6R9K7;J3QRR5;E9PLB0;E9PM61;U3KQD5	RBM4;RBM4B	0.374356	0.56225
Myozenin-2	Q9NPC6	MYOZ2	-0.524996	0.56225
Myosin light chain kinase 3	Q32MK0	MYLK3	0.428332	0.56225
cAMP-dependent protein kinase type II-alpha regulatory subunit	A8KAH7;A0A0S2Z472;A0A024R2W3;P13861	PRKAR2A	0.374386	0.56225
NADH dehydrogenase [ubiquinone] 1 subunit C2;NADH dehydrogenase [ubiquinone] 1 subunit C2, isoform 2	A0A024R5K6;O95298;E9PRJ5;E9PM14;A0A087WUM3;E9PQ53	NDUFC2;KCTD14;NDUFC2-KCTD14	-0.850362	0.56225
Heterogeneous nuclear ribonucleoprotein D-like	A0A087WUK2;A0A024RDF6;O14979;B4DTA2	HNRNPDL;HNRPDL	0.452318	0.56225
Protein-cysteine N-palmitoyltransferase HHAT-like protein	A0A024R2M3;Q9HCP6	GUP1;HHATL	0.5548	0.56225
U6 snRNA-associated Sm-like protein LSm3	P62310;B2R5H5	LSM3	0.427453	0.56225
Insulin-like growth factor 2 mRNA-binding protein 1	Q9NZI8;D3DTW3	IGF2BP1	0.309079	0.56225
Apolipoprotein E	A0A0S2Z3D5;P02649;J9ZVQ3;H0Y7L5;E9PEV4;E7ERP7	APOE	1.54889	0.56225
Vacuolar protein sorting-associated protein 13C	Q709C8	VPS13C	1.3847	0.56225
Liprin-beta-1	A0A024RB02;Q86W92;F5GZP6;B4DFU8	PPFIBP1	0.53922	0.56288
Cofilin-1	V9HWI5;P23528;G3V1A4;E9PP50;E9PK25;E9PQB7;B4E112;E9PLJ3;E9PS23	HEL-S-15;CFL1	0.306753	0.562933
Constitutive coactivator of PPAR-gamma-like protein 1	Q9NZB2	FAM120A	0.416955	0.563262
DnaJ homolog subfamily C member 8	O75937	DNAJC8	-0.834165	0.563262
LEM domain-containing protein 2	A0A024RCZ1;Q8NC56	LEMD2	0.598198	0.563262
Asparagine--tRNA ligase, cytoplasmic	O43776;B4DN60	NARS	-0.663349	0.565022
NA	H7BZJ3	PDIA3	-0.662303	0.565312
Golgin subfamily A member 3	Q08378	GOLGA3	-0.726601	0.566443
Mimecan	Q7Z532;A8K0R3;B4DI63;P20774;Q5TBF5	OGN	1.39822	0.569359
Cytochrome c oxidase subunit 3	A0A075X871;A0A059QTG6;H9E795;A0A075X6R4;H9E7H3;H9E7J9;B4YCG0;T1Q6R9;T1Q5Q2;T1Q5P3;T1Q5B9;S4T6M3;Q9B2X0;Q9B2W9;Q9B2U6;Q9B1S6;Q9B1S4;Q8WCY1;Q8HNQ7;Q85L10;Q85L04;Q85KZ1;Q85KW2;Q85KW0;Q7YEF1;Q7YCF3;Q7YCE5;Q7YCE0;Q7YCC7;Q7Y664;Q6WQG6;Q6WQA1;Q6RRW7;Q6RPE6;Q6RMU0;Q6RLY3;Q6R0W6;Q6R0Q1;Q5SB31;Q5SAG0;Q4F2U0;Q4F2A8;Q4F1I5;Q4F0P9;Q4EZD1;Q4EXJ4;Q305X3;Q305K6;Q305I0;Q27H55;Q15IP0;Q15II8;Q0G899;I6N522;F1AKZ3;E0…	COX3;COIII;CO3;coxIII;MT-CO3	0.435225	0.569359
Transmembrane and TPR repeat-containing protein 3	A8K321;B4DZ55;Q6ZXV5	TMTC3	0.630726	0.569359
Phosphatidylinositol transfer protein alpha isoform	V9HWC5;F5GWE5;Q6NUL6;Q00169;B4E1U1;I3L4H1;I3L471;I3L4C0;I3L4U7;I3L459	HEL-S-36;PITPNA	0.460294	0.569359
Fibrillin-1	P35555;Q75N88	FBN1	0.854076	0.569359
Nucleobindin-2;Nesfatin-1	E9PKG6;V9HW75;A0A087WSV8;P80303;Q2L696;E9PLR0;E9PLE9	NUCB2;HEL-S-109;Nucb2	0.787297	0.569359
Target of Myb protein 1	B4DKQ5;O60784;B4DJ44;B3KUF5	TOM1	0.795479	0.570276
Endoplasmic reticulum resident protein 29	V9HW71;P30040;F8VY02	HEL-S-107;ERP29	0.516036	0.571074
Versican core protein	A0A024RAQ9;Q59FG9;P13611;E9PF17;A0A024RAP3;A0A024RAL1;D6RGZ6	CSPG2;VCAN	0.578265	0.571074
40S ribosomal protein S25	P62851	RPS25	-0.565539	0.571074
Choline transporter-like protein 2	A0A024R798;A0A024R7D2;A0A088QF11;A0A088QCU6;Q8IWA5	SLC44A2	0.365523	0.571074
Helicase SKI2W	Q9NPK3;O76046;Q15477;Q96BC0;B4E0N1;B4DM01;B4DSY1;A0A024RCU1;Q59F56	SKIV2L;SKI2W	0.567868	0.571074
Complement C4-A;Complement C4 beta chain;Complement C4-A alpha chain;C4a anaphylatoxin;C4b-A;C4d-A;Complement C4 gamma chain	A0A140TA49;A0A140TA32;A0A140TA29;A0A0G2JPR0;P0C0L4	C4A	0.907406	0.571074
28S ribosomal protein S27, mitochondrial	G5EA06;B4DT94;A0A024RAJ1;Q92552;D6RH20;Q6PKB3;B4DKI9;Q8N6F2	MRPS27	-0.504349	0.571074
Methylcrotonoyl-CoA carboxylase subunit alpha, mitochondrial	A0A0S2Z693;Q96RQ3;E9PHF7;Q68D27;F5GYT8;E9PG35;B4DH16;G5E9X5;B4DHW5	MCCC1;DKFZp686B20267	0.306531	0.571074
Lysophospholipid acyltransferase 5	Q6P1A2;F5H0M4	LPCAT3	1.08761	0.571074
CAD protein;Glutamine-dependent carbamoyl-phosphate synthase;Aspartate carbamoyltransferase;Dihydroorotase	F8VPD4;P27708;Q53SY7	CAD	-0.627965	0.571074
Cell adhesion molecule 1	A0A087X105;A0A087WZW4;A0A087X1W8;A0A0A0MTJ8;A0A087WZR6;X5D8W0;X5DQS5;X5DQR8;X5DNF2;X5D7A8;Q9BY67;A0A087X0T8;A0A4Z1	CADM1	-0.506017	0.571074
Prefoldin subunit 4	E9PQY2;Q9NQP4	PFDN4	0.582224	0.571074
Metaxin-2	B7Z9F3;O75431;C9JNK6;B3KM74;C9JAZ1	MTX2	0.498746	0.571074
Protein FAM98B	Q52LJ0	FAM98B	0.493015	0.571637
NADH dehydrogenase [ubiquinone] flavoprotein 1, mitochondrial	G3V0I5;E5KNH5;P49821;Q53G70;Q96ID4;B4DE93;B4DUN7	NDUFV1	0.408803	0.571637
Oxygen-dependent coproporphyrinogen-III oxidase, mitochondrial	P36551	CPOX	0.816314	0.571995
Paxillin	A0A1B0GTU4;F5GZ78;B3KVL0;A0A140VJQ8;A0A1B0GU60;Q59GS5;P49023	PXN	-0.402047	0.572718
Nesprin-1	Q8NF91;E7ENN3;Q7RTM4	SYNE1	0.703445	0.572718
Supervillin	O95425	SVIL	0.508759	0.57529
5-AMP-activated protein kinase subunit gamma-2	B7Z6X8;E9PGP6;A0A090N8Q6;Q9UGJ0	PRKAG2	0.571107	0.57529
Plectin	Q15149	PLEC	-0.227994	0.57529
Dolichyl-diphosphooligosaccharide--protein glycosyltransferase 48 kDa subunit	A0A0C4DGS1;A0A024RAD5;P39656	DDOST	0.472431	0.57529
Lysophospholipid acyltransferase 7	B4DDH8;Q96N66	MBOAT7	0.52351	0.57529
Troponin I, slow skeletal muscle	A0A024R959;B3KW26;A0A087WT47;P19237;G3V489;G3V4F8;G3V3L5	TNNI1	-0.582875	0.57529
Exportin-1	O14980;B7ZB16;B3KWD0;B4DR01	XPO1	0.483627	0.57529
Glutaredoxin-related protein 5, mitochondrial	Q86SX6	GLRX5	0.74904	0.57529
ATP-dependent Clp protease ATP-binding subunit clpX-like, mitochondrial	A0A024R5X7;O76031;Q9H072	CLPX;DKFZp586J151	-0.532558	0.57529
Myomesin-2	A0A024QZ61;P54296;E7EWH9;B4DNE9;A0A0J9YVV7	MYOM2	-0.488528	0.57529
F-actin-capping protein subunit alpha-1	A0A024R0E5;P52907;A8K0T9	CAPZA1	0.769006	0.57529
Pyruvate dehydrogenase phosphatase regulatory subunit, mitochondrial	Q8NCN5;B4DZL5;A8MT40;H3BQG3	PDPR	0.628062	0.57529
Myosin-3	P11055;Q5GJ67	MYH3	-0.592934	0.57529
Heat shock protein beta-8	Q9UJY1	HSPB8	-0.438626	0.57529
28S ribosomal protein S6, mitochondrial	P82932	MRPS6	-0.364877	0.57529
Leukocyte surface antigen CD47	A0A0A1TSG4;Q08722	CD47	-0.650034	0.57529
Actin, alpha cardiac muscle 1;Actin, aortic smooth muscle;Actin, gamma-enteric smooth muscle	P68032;D2JYH4;A8K3K1;P62736;P63267;B3KW67;Q13707	ACTC1;ACTA2;ACTG2	-0.397771	0.57529
Delta-1-pyrroline-5-carboxylate synthase;Glutamate 5-kinase;Gamma-glutamyl phosphate reductase	P54886	ALDH18A1	-0.822299	0.57529
Sorting nexin-5	Q9Y5X3;Q5QPE4;Q53FH8;Q6P5V6;Q5QPE5;B7Z476	SNX5	0.566235	0.57529
Serine/arginine repetitive matrix protein 2	A0A140VK53;Q9UQ35;O60382	SRRM2;KIAA0324	0.742821	0.57529
AP-2 complex subunit mu	A0A087WY71;E9PFW3;B4DNB9;Q96CW1;B4DJB1;B4DFM1;B4E304;C9JJ47;B4DTI4;B7Z4N2	AP2M1	0.903519	0.57529
DAZ-associated protein 1	K7EQ55;K7EK33;A0A0S2Z569;Q96EP5;K7EQ02;Q5IRN2	DAZAP1;DAZAP1/MEF2D fusion	0.46876	0.57529
Heterogeneous nuclear ribonucleoprotein L-like	B7WPG3;C9IYN3;A8K894;D6W592;A0A0S2Z6K1;Q8WVV9;A0A0S2Z5U3	HNRNPLL;HNRPLL	0.565448	0.57529
Cytochrome b-c1 complex subunit Rieske, mitochondrial;Cytochrome b-c1 complex subunit 11;Putative cytochrome b-c1 complex subunit Rieske-like protein 1	P47985;P0C7P4	UQCRFS1;UQCRFS1P1	-0.377109	0.57529
Acylpyruvase FAHD1, mitochondrial	Q6P587	FAHD1	0.42707	0.57529
Centromere/kinetochore protein zw10 homolog	B2R7C2;O43264;B4E1J7	ZW10	-0.313603	0.57529
Phosphoribosylformylglycinamidine synthase	A8K9T9;A8K8N7;O15067	PFAS	0.363568	0.57529
Mitochondrial import receptor subunit TOM22 homolog	Q549C5;Q9NS69;Q53GB0	MST065;TOMM22	0.328948	0.57529
C-terminal-binding protein 1	X5D8Y5;Q13363;Q4KMQ8;X5D7T7;D6RAX2;E7ESU7;E7EPF8	CTBP1	0.631527	0.57529
ATP-dependent 6-phosphofructokinase;ATP-dependent 6-phosphofructokinase, muscle type	A0A024R0Y5;P08237;A0A0S2Z4A1;Q96I60;A0A0S2Z4I1;Q7KYX9	PFKM	-0.280121	0.57529
FACT complex subunit SPT16	Q9Y5B9	SUPT16H	0.847941	0.57529
Endophilin-B1	A0A140VJU5;A0A087WW40;Q9Y371	SH3GLB1	0.509604	0.57529
Zinc transporter SLC39A7	B4DZZ8;B4DVK8;A0A024RCX7;Q92504	SLC39A7	1.06809	0.57529
ADP-ribosylation factor 1;ADP-ribosylation factor 3	A0A024R3Q3;A0A024R0Y6;P84077;P61204;F5H423;B4E190;B4DN70;B4DEB9;B4DJC8	ARF1;ARF3	0.282257	0.57529
Hsc70-interacting protein;Putative protein FAM10A5;Putative protein FAM10A4	B4E0U6;A0A140VKA6;P50502;Q1XBU6;B7ZA40;Q0IJ56;H7C3I1;Q8NFI4;Q3KNR6;Q8IZP2;F6VDH7	ST13;ST13P5;ST13P4	0.400879	0.57529
Citrate synthase;Citrate synthase, mitochondrial	B4DJV2;A0A024RB75;O75390;B3KTN4;A0A0C4DGI3	CS	-0.338322	0.57529
Fibronectin;Anastellin;Ugl-Y1;Ugl-Y2;Ugl-Y3	A0A024R462;B7ZLE5;P02751;Q6MZM7;Q6N084;Q68CX6	FN1;DKFZp686O12165;DKFZp686L11144;DKFZp686O13149	0.379981	0.57529
Myosin regulatory light chain 12A;Myosin regulatory light chain 12B	J3QRS3;P19105;O14950;Q53HL1;Q2F834	MYL12A;MYL12B	0.368918	0.57529
Splicing factor 3B subunit 1	O75533;Q7Z497	SF3B1	0.319323	0.57529
Nucleosome assembly protein 1-like 1	F8VY35;F5H4R6;H0YIV4;A0A024RBB7;P55209;F8W020;F8W118;F8VV59;A0A024RBE6;F8W0J6;B7Z2V4;F8VRJ2;B7Z5H0;H0YH88;H0YHC3;F8VXI6;F8VUX1;B7Z9C2;F8VVB5	NAP1L1	0.553034	0.57529
Ubiquitin-conjugating enzyme E2 variant 1	Q13404;I3L0A0;G3V2F7;A0A0A0MSL3	UBE2V1;TMEM189-UBE2V1	0.287366	0.57529
Ubiquitin carboxyl-terminal hydrolase 28;Ubiquitin carboxyl-terminal hydrolase	Q96RU2;B4E3L3;G3V1N5	USP28	0.719088	0.57529
LDLR chaperone MESD	Q14696	MESDC2	0.449405	0.57529
Signal recognition particle receptor subunit alpha	P08240;Q6IAX9;A0A024R3M0	SRPR	0.374402	0.57529
60S ribosomal protein L35	P42766;F2Z388;A4D2M5;A0A024R866	RPL35;LOC154880	0.981762	0.57529
Ephrin-B3	Q15768	EFNB3	0.548806	0.57529
RNA-binding protein 20	Q5T481	RBM20	0.800064	0.58387
26S proteasome non-ATPase regulatory subunit 13	A0A024R201;Q9Y6E3;Q9UNM6;Q53GN6;B2RBM7;A0A087WUL9;B4DJ66;J3KNQ3;E9PL38;H0YD73	PSMD13	0.378605	0.584564
N-acetylglucosamine-6-sulfatase	B4DTT0;Q7Z3X3;H7C3P4;A8K6V6;A0A024RBC5;F6S8M0;B4E284;P15586;H0YFA9;F5H4C6	DKFZp686E12166;GNS	0.780009	0.584564
Peroxidasin homolog	Q92626;H7C1W1	PXDN	0.539067	0.584564
Spondin-1	Q9HCB6	SPON1	0.442329	0.584564
Elongation factor G, mitochondrial	E5KND5;Q96RP9;C9IZ01;D3DNL3;F8WAU4	GFM1	0.576705	0.587788
Paralemmin-1	B2RCL4;A0A024R1Y6;O75781;A0A024R207;B7Z649;B3KMX3	PALM	-0.535947	0.590447
Cleavage and polyadenylation specificity factor subunit 6	F8WJN3;Q16630;B4DSU9	CPSF6	-0.540786	0.594016
Alpha-centractin	P61163;R4GMT0;B4DM97;B4DXP9;A0A1B0GVS3;B4DMT4	ACTR1A	0.606483	0.594016
Lactoylglutathione lyase	X5DNM4;V9HW62;Q04760	GLO1;HEL-S-74	0.291025	0.594016
Proteasome subunit alpha type-1;Proteasome subunit alpha type	P25786;V9HW55;F5GX11;B4E0X6;B4DEV8	PSMA1;HEL-S-275	0.515957	0.594713
ATP-binding cassette sub-family D member 3	B4DL07;P28288;B4DZ22	ABCD3	0.644142	0.594713
26S protease regulatory subunit 6A	R4GNH3;A8K781;A0A140VK42;P17980;E9PM69;E9PKD5;E9PN50	PSMC3	0.38607	0.601264
Calcium-regulated heat stable protein 1	Q9Y2V2;H3BSW7;H3BUY4;H3BPY5;H3BNU9;H3BTK3;I3L3X8	CARHSP1	0.283762	0.601264
ADP/ATP translocase 1	A0A0S2Z3H3;P12235;V9GYG0;A0A0S2Z359;A0A0S2Z3C4	SLC25A4	-0.411985	0.601264
Nuclear mitotic apparatus protein 1	A0A024R5M9;Q4LE64;Q14980;A0A087WY61;A0A024R5G4;Q59HB8;Q7Z757	NUMA1;NUMA1 variant protein	0.398663	0.601264
Quinone oxidoreductase PIG3	Q53FA7;H7BZH6;B4DMQ7	TP53I3	-0.302639	0.601264
Peroxiredoxin-6	V9HWC7;P30041	HEL-S-128m;PRDX6	-0.257653	0.601264
Signal peptidase complex subunit 2	B4DDB9;A0A087WUC6;E9PI68;Q15005;E9PL01	SPCS2	-0.701207	0.601264
NA	B4DLN1	NA	0.741132	0.601264
Electron transfer flavoprotein subunit beta	P38117;M0QY67	ETFB	0.334962	0.601264
Squamous cell carcinoma antigen recognized by T-cells 3	Q15020;F8VV04;B4DRG9;B4E3R6	SART3	-0.474642	0.601264
Peptidyl-prolyl cis-trans isomerase;Peptidyl-prolyl cis-trans isomerase A;Peptidyl-prolyl cis-trans isomerase A, N-terminally processed	V9HWF5;A8K486;P62937;B2RE56;B4DM82;Q71V99;F8WE65;C9J5S7	HEL-S-69p;PPIA	-0.365833	0.601264
Prefoldin subunit 5	Q99471;H3BPF6	PFDN5	0.478397	0.601264
Eukaryotic translation initiation factor 3 subunit C;Eukaryotic translation initiation factor 3 subunit C-like protein	B4DVQ5;A1KYQ7;A0A024QYU9;Q99613;B5ME19;B4DVU3;B4DDN4;B4DRU0;B4E2Z6;A0A024QYX7;B3KNZ4	EIF3C;EIF3CL	-0.572665	0.601264
Serine/threonine-protein kinase OSR1	A0A024R2M7;O95747;C9JIG9	OXSR1	0.685153	0.601264
Tricarboxylate transport protein, mitochondrial	Q6LAP8;D9HTE9;P53007;B4DP62	SLC25A1	0.247692	0.601264
NHP2-like protein 1;NHP2-like protein 1, N-terminally processed	Q6FHM6;P55769;B1AHD1	NHP2L1	0.393883	0.601264
10 kDa heat shock protein, mitochondrial	P61604;Q9UNM1;B8ZZL8;A0A024R3X7	HSPE1;EPFP1	0.324805	0.601264
S-formylglutathione hydrolase	A0A140VJJ2;P10768;X6RA14;H7BZT7	ESD	0.374076	0.601264
Phosphomevalonate kinase	Q6FGV9;Q15126	PMVK	0.603919	0.601264
40S ribosomal protein S10;Putative 40S ribosomal protein S10-like	P46783;Q59GE4;F6U211;Q9NQ39	RPS10;RPS10P5	-0.246862	0.601264
RuvB-like 1	B5BUB1;Q9Y265;E7ETR0;B3KRS7	RUVBL1	0.262095	0.601264
Unconventional myosin-XVIIIa	A0A0D9SFK2;A0A024QZ63;Q92614;B4DZ32	MYO18A;hCG_27198	-0.47955	0.601264
28S ribosomal protein S26, mitochondrial	Q9BYN8	MRPS26	-0.476023	0.601264
Protein scribble homolog	A0A0G2JNZ2;A0A0G2JPP5;Q14160;A0A0G2JMS7	SCRIB	0.452027	0.601264
Junctophilin-2	Q9BR39;B4E3T9;Q86VZ3	JPH2	0.617472	0.601264
Cytochrome c oxidase subunit 6C	A0A024R9B7;P09669	COX6C	-0.763215	0.601264
NAD-dependent malic enzyme, mitochondrial	P23368	ME2	-0.407724	0.601264
cAMP-dependent protein kinase type I-alpha regulatory subunit;cAMP-dependent protein kinase type I-alpha regulatory subunit, N-terminally processed	Q68DQ4;B2R5T5;P10644;K7EPB2	DKFZp779L0468;PRKAR1A	-0.33549	0.601264
Dermatopontin	Q07507	DPT	1.85905	0.601471
Prolyl 4-hydroxylase subunit alpha-1	P13674;Q5VSQ6	P4HA1	0.480599	0.601471
Nodal modulator 1	A0A0G2JN29;A0A087X117;Q15155;A0A0G2JP90;A0A087WW46	NOMO1	0.506342	0.601471
Enhancer of mRNA-decapping protein 4	Q6P2E9;B7Z7V8	EDC4	0.608231	0.601471
FAS-associated factor 2	Q96CS3;B4E2M8	FAF2	-0.424586	0.601471
39S ribosomal protein L44, mitochondrial	A0A024R473;Q9H9J2	MRPL44	0.558863	0.601471
Ras-related protein Rab-1B	Q9H0U4;Q6FIG4;E9PLD0;Q9H1C9	RAB1B	0.552182	0.601471
Transcription intermediary factor 1-beta	B2R8R5;Q13263	TRIM28	0.327087	0.601471
Ras-related protein Rap-1A	A8KAH9;P62834;Q5U0C3;A0A075B6Q0	RAP1A	0.377075	0.601471
Zyxin	Q15942;H0Y2Y8;Q96AF9;Q28617;Q9BUS0;B4DQR8;B4DY85	ZYX	0.538922	0.601471
Growth hormone-inducible transmembrane protein	B4DSV8;B4DPG9;Q9H3K2;Q6FIA7;B4DNL0;Q9Y6G2	GHITM	0.330451	0.601471
Argininosuccinate lyase	A0A024RDL8;P04424;A0A0S2Z316;B4DU69;A0A0S2Z3B0;F8W943	ASL	-1.05535	0.601471
Hypoxia up-regulated protein 1	A0A087X054;Q9Y4L1;B7Z2N4;B3KXH0;B7Z766;E9PJ21;Q05D91;A0A087WWI4;Q6IN67;K7EQK2;B7Z602	HYOU1	0.300317	0.601471
[Pyruvate dehydrogenase (acetyl-transferring)] kinase isozyme 3, mitochondrial	Q15120	PDK3	0.841503	0.601471
Flotillin-2	A0A024QZ62;Q14254;Q6FG43;E7EMK3;J3QLD9;Q9BTI6;K7EKW9	hCG_1998851;FLOT2	0.299744	0.601471
28S ribosomal protein S18b, mitochondrial	B0S7P4;Q9Y676;B4DFG6;A0A0G2JIC6	MRPS18B	-0.297148	0.601471
NA	G3V325;B4DJ38;C9JJT5	ATP5J2-PTCD1	-0.46018	0.601471
Actin-related protein 2	P61160;Q8IY98;F5H6T1;B4DHK9;B4DWQ5	ACTR2	0.282416	0.601471
Retinol dehydrogenase 14	Q53RX3;Q9HBH5	RDH14	0.601593	0.608085
Glucose-6-phosphate isomerase	B4DVJ0	NA	0.42795	0.612315
Adipocyte enhancer-binding protein 1	Q8IUX7;B4DJB3	AEBP1	0.485342	0.612315
Leucine-rich repeat-containing protein 59	Q96AG4	LRRC59	0.482299	0.613655
Gamma-enolase;Enolase	Q6FHV6;P09104;A8K3B0;F5H0C8	ENO2	0.309746	0.613655
Cytochrome b-c1 complex subunit 2, mitochondrial	P22695;H3BRG4;H3BSJ9;H3BP04	UQCRC2	-0.267222	0.613886
Sodium/potassium-transporting ATPase subunit alpha-1	P05023	ATP1A1	-0.274336	0.613886
NA	A6MUU8	MIF	0.444976	0.613886
Ubiquitin-fold modifier 1	P61960;H0Y614	UFM1	0.288122	0.613886
Vitronectin;Vitronectin V65 subunit;Vitronectin V10 subunit;Somatomedin-B	D9ZGG2;P04004	VTN	1.12431	0.613886
Vesicular integral-membrane protein VIP36	B4DWN1;A8K7T4;Q12907;D6RBV2;D6RIU4;D6RDX1	LMAN2	0.570211	0.613886
Programmed cell death 6-interacting protein	Q8WUM4;Q4W4Y1;B4DHD2;B7Z5C1	PDCD6IP;DRIP4	0.27317	0.613886
39S ribosomal protein L2, mitochondrial	Q5T653;C9IY40;B4DVE2	MRPL2	0.3381	0.613886
Dipeptidyl peptidase 2	Q9UHL4;Q59EM4	DPP7	0.29331	0.613886
GrpE protein homolog 1, mitochondrial;GrpE protein homolog	Q9HAV7;B4DWV5	GRPEL1	0.42131	0.613886
RNA-binding protein with serine-rich domain 1	H3BPG5;H3BV80;H3BMM9;H3BTC0;D3DU92;Q15287;H3BMS0;A0A024R9P1	RNPS1;hCG_2026745	0.434611	0.613886
Synaptosomal-associated protein;Synaptosomal-associated protein 23	A8K287;O00161;A0A024R9R8;H3BNE1;H3BR18;H3BM38;H3BPJ0	SNAP23	-0.275961	0.613886
Lysosomal alpha-glucosidase;76 kDa lysosomal alpha-glucosidase;70 kDa lysosomal alpha-glucosidase	A0A024R8Q1;P10253	GAA	0.907857	0.613886
TSC22 domain family protein 4	Q9Y3Q8;Q8IV54	TSC22D4	0.570199	0.613886
Alpha-2-macroglobulin receptor-associated protein	B2R6S9;P30533;A8K8F6	LRPAP1	-0.46028	0.61499
Delta-sarcoglycan	Q92629	SGCD	-1.09201	0.61499
Vacuolar protein sorting-associated protein 28 homolog	Q548N1;Q9UK41;A0A0S2Z5H5;E9PQR7;E9PM90	VPS28	0.51466	0.61499
Polyadenylate-binding protein 2	Q86U42	PABPN1	0.516277	0.619273
Annexin;Annexin A5	V9HWE0;P08758;D6RBE9;D6RBL5;E9PHT9	HEL-S-7;ANXA5	0.288182	0.619273
Structural maintenance of chromosomes flexible hinge domain-containing protein 1	A6NHR9;J3KTL8	SMCHD1	0.478513	0.619273
Complex I assembly factor TIMMDC1, mitochondrial	Q9NPL8;C9JU35;G3XA94	TIMMDC1	0.387477	0.620705
Myosin-11	A0A024QZJ6;A0A024QZJ4;B1PS43;P35749;Q7Z7R0	MYH11	0.554353	0.620705
Sodium/potassium-transporting ATPase subunit beta-2	P14415;I3L3J8	ATP1B2	0.613293	0.620705
Isobutyryl-CoA dehydrogenase, mitochondrial	Q9UKU7;Q59FC2	ACAD8	0.33923	0.621745
26S proteasome non-ATPase regulatory subunit 2	Q13200;Q59EG8;B4DM22;Q9NSM5;Q13041	PSMD2;DKFZp564A2282	0.361478	0.623311
Methylcrotonoyl-CoA carboxylase beta chain, mitochondrial	A0A140VK29;Q9HCC0;D6RDF7;A0A0S2Z5R4	MCCC2	0.391567	0.623311
Prefoldin subunit 2	B1AQP2;Q9UHV9	PFDN2	0.41091	0.623311
40S ribosomal protein S15a	B2R4W8;P62244;I3L3P7;A8K7H3;I3L246	hCG_1994130;RPS15A	0.201429	0.623311
Synaptic vesicle membrane protein VAT-1 homolog	A0A024R1Z6;Q99536;B3KUF8	VAT1	0.362226	0.623371
Mannosyl-oligosaccharide glucosidase	Q13724;C9J8D4	MOGS	0.659572	0.623371
Splicing factor 3B subunit 2	Q13435;E9PPJ0;Q7Z3K9;E9PJ04;H0YCG1	SF3B2;DKFZp781L0540	0.405052	0.623371
NA	D3DPG0;A0A0A0MTS7	TTN	-0.301134	0.625975
Disco-interacting protein 2 homolog B	Q9P265;Q96IB4	DIP2B	0.597093	0.625975
NA	A8K6Q8;B7Z2I6	NA	0.343893	0.625975
Endoplasmic reticulum-Golgi intermediate compartment protein 1	B4E0N6;Q969X5	ERGIC1	0.378879	0.625975
Methylthioribulose-1-phosphate dehydratase	B4DY17;Q96GX9;S4R3D6	APIP	0.419687	0.625975
Histone-binding protein RBBP7	Q6FHQ0;Q16576;E9PC52;A8K6A2;Q5JP01	RBBP7	0.478065	0.625975
Up-regulated during skeletal muscle growth protein 5	Q96IX5	USMG5	0.277334	0.625975
Protein kinase C and casein kinase substrate in neurons protein 3	A0A0C4DGG1;B4DUI2;Q9UKS6;D3DQR0;E9PIY1	PACSIN3	-0.280598	0.625975
RuvB-like 2	Q9Y230;B3KNL2;M0R0Y3	RUVBL2	0.308378	0.625975
Nephronectin	D6RH31;Q6UXI9;H0YAK9	NPNT	0.463376	0.626817
Chloride intracellular channel protein;Chloride intracellular channel protein 5	Q53G01;Q9NZA1;B2RAZ0;Q7Z2R8	CLIC5;MST130	0.504573	0.627815
Nestin	D3DVC4;P48681	NES	0.401354	0.632616
Disks large homolog 1	A0A0C4DFT3;Q12959;Q59FC4;B4DF78;E7EQD7	DLG1	0.450155	0.632616
Matrix-remodeling-associated protein 7	P84157	MXRA7	-0.522265	0.636222
26S proteasome non-ATPase regulatory subunit 1	B2R6D0;Q99460;A0A087WW66;Q05CW6;Q05BX4	PSMD1	0.282686	0.636443
Fructose-bisphosphate aldolase;Fructose-bisphosphate aldolase A	V9HWN7;P04075;J3KPS3;H3BQN4;H3BPS8;H3BUH7;A0A0M4FNU3;H3BR04;H3BMQ8	HEL-S-87p;ALDOA	-0.311113	0.636455
NA	CON__P02666	NA	2.61333	0.636455
NA	B0ZBE8	NPPA	0.671582	0.638861
NADH dehydrogenase [ubiquinone] iron-sulfur protein 8, mitochondrial	O00217;A0A024R5K3;E9PPW7;Q53G17;E9PKH6;E9PN51;F8W9K7;B4DYI3	NDUFS8	-0.697715	0.639239
NADH dehydrogenase [ubiquinone] 1 beta subcomplex subunit 4	O95168;C9JXQ9;F2Z3P9	NDUFB4	-0.359464	0.642534
Adenine phosphoribosyltransferase	P07741;H3BQZ9;H3BQF1;H3BQB1;H3BSW3	APRT	-0.714518	0.642534
Toll-interacting protein	Q6FIE9;Q9H0E2;Q8N8J5;F2Z2Y8;E9PNS3	TOLLIP	0.315414	0.642742
PDZ and LIM domain protein 1	V9HW92;O00151	HEL-S-112;PDLIM1	0.253317	0.642742
Pleiotropic regulator 1	O43660;H0YA24	PLRG1	0.516545	0.642742
Myosin-1	V9HWC1;P12882	HEL71;MYH1	-0.636137	0.642742
Eukaryotic translation initiation factor 3 subunit M	Q7L2H7;H0YCQ8	EIF3M	0.503317	0.642742
Diablo homolog, mitochondrial	Q502X2;A0A0S2Z5U7;Q9NR28;A0A024RBT2;A0A0S2Z5P6;Q53HB7;K7X1S0;F5H796;F5GXT8	DIABLO	-0.233305	0.642742
Membrane-associated progesterone receptor component 1	Q6IB11;O00264	PGRMC1	-0.309821	0.642742
Wolframin	A0A0S2Z4V6;O76024	WFS1	0.422911	0.642742
Heterogeneous nuclear ribonucleoprotein H3	Q53F48;A0A024QZK8;P31942;B4DHY1;A0A024QZP1	HNRPH3;HNRNPH3	-0.242742	0.642742
Sushi repeat-containing protein SRPX	P78539;V9HW11	SRPX;HEL-S-83p	0.62165	0.642742
Mitochondrial import inner membrane translocase subunit Tim13	Q9Y5L4;K7EIT2	TIMM13	0.63027	0.642742
Ras-related protein Rab-18	Q9NP72;A0A087X163;B7Z5V3;Q5W0J0;B7Z4P9;H0Y6T8	RAB18	0.254468	0.642742
Succinate dehydrogenase [ubiquinone] flavoprotein subunit, mitochondrial	A0A024QZ30;P31040;D6RFM5;B3KT34;A0A087X1I3;Q0QF12;B4DYN5	SDHA	-0.396842	0.642742
U6 snRNA-associated Sm-like protein LSm8	A4D0W0;O95777;F2Z2Y6;C9JIZ0;C9JNV3	LSM8	0.607791	0.642742
Inositol monophosphatase 1	A0A024R830;A0A140VJL8;P29218;E5RIP7;H0YBL1;E5RG13;E5RI82;E5RGY4	IMPA1	0.482259	0.642742
LIM and SH3 domain protein 1	A0A024R1S8;Q14847;C9J9W2;A8K1D2;B4DIC4;B4DJI4	LASP1	0.432061	0.642742
Plexin-B2	O15031	PLXNB2	0.968735	0.642742
HIV Tat-specific factor 1	O43719;B4DRS4;Q5H919;Q5H918	HTATSF1	0.366551	0.643006
Ferrochelatase;Ferrochelatase, mitochondrial	Q53FU1;Q7KZA3;P22830;Q5TZY0;B4DSA4;K7ELX4	DKFZp686P18130;FECH	0.437088	0.643509
[Pyruvate dehydrogenase [acetyl-transferring]]-phosphatase 1, mitochondrial	B3KPZ7;A0A024R9C0;B4DYX8;Q6P1N1;Q9P0J1	PPM2C;PDP1	0.572279	0.643509
Obscurin	A6NGQ3;Q5VST9	OBSCN	0.318399	0.643509
40S ribosomal protein S18	P62269	RPS18	-0.343856	0.643509
Microtubule-associated protein RP/EB family member 2	A0A024RC33;Q15555	MAPRE2	-0.598641	0.643509
Actin-related protein 3	A0A024RAI1;P61158;B4DXW1;Q59FV6;B4DT29;B4DTI0	ACTR3	-0.274163	0.643509
Cytochrome c oxidase protein 20 homolog	B3KM21;Q5RI15	FAM36A;COX20	0.312395	0.643509
Vacuolar protein sorting-associated protein 4A	I3L4J1;A0A024R705;Q9UN37;Q9NXK5;Q9UF30	VPS4A;DKFZp434E0418	0.29234	0.643509
Succinate dehydrogenase [ubiquinone] iron-sulfur subunit, mitochondrial	P21912;A0A087WWT1;A0A087WXX8	SDHB	-0.333656	0.643509
Proliferation-associated protein 2G4	A8K6Y1;Q6PIN5;A0A024RB85;Q9UQ80;Q05D08;F8VR77	PA2G4	0.234503	0.643509
40S ribosomal protein S17	P08708;H0YN88;A0A075B716;H0YN73	RPS17	-0.53459	0.643509
Protein lunapark	B7Z829;B7ZLA9;Q9C0E8;B7Z7F5	KIAA1715;LNP	0.446734	0.643509
Prostaglandin E synthase 2;Prostaglandin E synthase 2 truncated form	B3KPZ2;Q9H7Z7;A6NHH0;B4DWP1;X6RJ95	PTGES2	0.415358	0.643509
Alpha-2-macroglobulin	P01023	A2M	0.729234	0.643509
NEDD8-activating enzyme E1 regulatory subunit	Q13564	NAE1	-0.343912	0.643509
Transcriptional activator protein Pur-beta	Q96QR8	PURB	0.45009	0.643509
Nesprin-2	Q8WXH0;A0A0C4DGK3	SYNE2	0.478063	0.643509
Scaffold attachment factor B1	B7Z2Z1;B7ZLP5;A8K329;Q15424;B7Z1C7;B7Z2F6;B7Z5X3;B7Z959	SAFB	0.433172	0.643509
Glutathione synthetase	V9HWJ1;P48637;B7Z1C5;B7Z514	HEL-S-64p;GSS	0.612247	0.643509
Heterogeneous nuclear ribonucleoprotein M	P52272;A0A087X0X3;Q59ES8;Q7KYM9	HNRNPM;ORF	-0.230051	0.643509
Bcl-2-associated transcription factor 1	E9PK09;E9PQN2;E9PKI6;E9PK91;Q9NYF8;Q6DCA8;E9PJA7	BCLAF1	0.761552	0.643509
COP9 signalosome complex subunit 8	E9PGT6;B2R8N1;A0A024R4D1;Q99627;H7C3S9	COPS8	0.479534	0.643509
Nuclear cap-binding protein subunit 1	A0A024R179;Q09161	NCBP1	0.292816	0.643509
Calpain-2 catalytic subunit	Q59EF6;B2RCM3;P17655;B4E1R7;B4DN77	CAPN2	0.382994	0.643509
SWI/SNF-related matrix-associated actin-dependent regulator of chromatin subfamily E member 1	J3QKS7;B4DGM3;A0A024R1S7;Q969G3;K7EMQ8;H7C048	SMARCE1	0.614175	0.643509
Ubiquitin carboxyl-terminal hydrolase;Ubiquitin carboxyl-terminal hydrolase 14	B2RD79;P54578;A6NJA2;D3DUG9;B3KTG4	USP14	-0.534349	0.646244
Eukaryotic translation initiation factor 5	A0A024R6Q1;P55010;Q6IBU0	EIF5	-0.329603	0.646628
Heterogeneous nuclear ribonucleoprotein A/B	D6R9P3;D6RD18;B4DMY3;D6RBZ0;Q53F64;Q99729	HNRNPAB	-0.494561	0.646628
Insulin-like growth factor-binding protein 5	A0A024R433;P24593;C9JXX4	IGFBP5	-0.387163	0.650044
Spliceosome RNA helicase DDX39B	A0A024RCM3;Q13838;A0A0G2JJZ9;Q5STU3;B4DP52;A0A140T9X3;F6WLT2;A0A140T9X9;A0A140T996;F6UJC5;A0A140TA18;A0A0A0MT12;F6TRA5	hCG_2005638;DDX39B	0.190967	0.650044
NADH dehydrogenase [ubiquinone] 1 alpha subcomplex assembly factor 4	Q9P032	NDUFAF4	0.434227	0.650044
Sodium/potassium-transporting ATPase subunit alpha-3	M0R116;Q53ES0;B7Z9V4;A0A0A0MT26;P13637;B7Z1Q9;B7Z3F8;B3KV59;B3KSY7	ATP1A3	-0.237523	0.650044
Caveolin;Caveolin-1	Q2TNI1;Q03135;Q59E85;E9PCT5	CAV1	0.239781	0.650044
Endoplasmic reticulum resident protein 44	Q9BS26	ERP44	0.420784	0.650044
NA	A0A0S2Z6I7;A0A0S2Z5Z3;H0Y8L5;E9PFJ4	MLIP	-0.382279	0.650044
N-acetyl-D-glucosamine kinase	Q9UJ70;H7C3G9;C9JEV6;H7C1L7;H0YEB7	NAGK	0.776512	0.650044
Crk-like protein	P46109	CRKL	0.36755	0.650044
Nuclear ubiquitous casein and cyclin-dependent kinase substrate 1	Q9H1E3;B4DTY3;Q6IA16	NUCKS1;NUCKS	-0.456434	0.650044
L-2-hydroxyglutarate dehydrogenase, mitochondrial	A8K9B2;Q9H9P8;C9JVN9	L2HGDH	0.565308	0.650044
Protein canopy homolog 2	F8W031;F8VXJ7;Q9Y2B0;F8W1K5	CNPY2	0.41064	0.650044
Cytochrome c oxidase subunit 2	Q7Y6N0;Q4GVP5;C8YBL1;A0A097PWR7;Q14XT3;X2D4U2;H9E7F7;H9E7P8;A0A1B1PEQ8;H9E7W2;H9E7T7;H9PDV6;X5C6M5;X5BKA4;X2CK15;W8DFH5;W8DBX9;W8D1X2;V9K571;V9JPM6;V9J3S1;U5Z9R9;U5Z487;U3LSI8;U3L556;T1SWS8;T1Q632;S4STI1;R9Y412;Q9B2U8;Q9B138;Q8WCW3;Q8HNR1;Q85KS0;Q7YCE6;Q7Y6M3;Q6VJJ3;Q6VJD8;Q6VIG7;Q6RQ80;Q6RNN7;Q6RKW8;Q6R0V6;Q5SB08;Q5SAP1;Q5SA98;Q5S971;Q4GQP0;Q4GHE1;Q4GCZ4;Q4GCG2;Q4GCC3;Q4F4V6;Q4EZD4;Q305H0;Q19MP7…	COX2;COII;cox2;MT-CO2	-0.460353	0.650044
Protein FAM136A	E7EQY1;Q96C01;B0AZT6	FAM136A	0.634231	0.650044
Histone H3	Q5TEC6	HIST2H3PS2	-0.273885	0.650044
39S ribosomal protein L53, mitochondrial	Q96EL3	MRPL53	0.286056	0.650044
Small nuclear ribonucleoprotein G;Putative small nuclear ribonucleoprotein G-like protein 15	Q49AN9;F5H013;P62308;A8MWD9	SNRPG;SNRPGP15	0.323424	0.650044
V-type proton ATPase catalytic subunit A	P38606;B7Z2V6	ATP6V1A	0.298243	0.650044
DNA replication licensing factor MCM4	B4DLA6;B3KMX0;A0A024R7U6;P33991	MCM4	-0.473839	0.650044
Inositol-3-phosphate synthase 1	A0A140VK73;Q9NPH2;B3KSG0;B7Z3K3	ISYNA1	-0.427867	0.650044
Neuroblast differentiation-associated protein AHNAK	Q09666	AHNAK	-0.231478	0.650044
Dynamin-1-like protein	G8JLD5;O00429;D3DUW7;D3DUW6;B4DYR6;D3DUW5;Q32Q67	DNM1L	0.313478	0.650044
Stress-induced-phosphoprotein 1	V9HW72;A8K690;P31948	HEL-S-94n;STIP1	-0.348365	0.650044
Catenin beta-1	B4DL06;A0A024R2Q3;P35222;B4DGU4;B5BU28;B4DSW9	CTNNB1	0.292891	0.650044
Cullin-associated NEDD8-dissociated protein 1	A8K8U1;Q86VP6;A0A0C4DGH5	CAND1	0.344571	0.650642
Tropomodulin-1	P28289	TMOD1	0.288124	0.650642
Basic leucine zipper and W2 domain-containing protein 2	B7Z4K8;E7ETZ4;B3KM68;A0A024RA42;Q9Y6E2;Q75MG1;B5MCH7;B5MCE7;E9PFD4	BZW2	-0.494732	0.650642
26S protease regulatory subunit 7	A0A140VK70;P35998;Q75L23	PSMC2	0.231118	0.650642
ADP-sugar pyrophosphatase	A6NFX8;Q9UKK9;A6NJU6	NUDT5	0.34031	0.650642
Peripheral plasma membrane protein CASK	B7ZKY2;O14936;Q5JS74	CASK	0.686596	0.650642
U4/U6 small nuclear ribonucleoprotein Prp31	F1T0A5;Q8WWY3;E7EVX8;B4DWW8	PRPF31	0.432867	0.650642
NADH dehydrogenase [ubiquinone] 1 beta subcomplex subunit 7	P17568	NDUFB7	0.296973	0.650642
Cell division cycle 5-like protein	B4DSH1;B3KY60;Q99459	CDC5L	0.538666	0.650642
39S ribosomal protein L47, mitochondrial	Q9HD33	MRPL47	0.222461	0.650642
Chromobox protein homolog 5	V9HWG0;P45973;Q6I9T7	HEL25;CBX5	0.55865	0.650642
Dipeptidyl peptidase 3	Q5JPB8;G3V1D3;G3V180;Q9NY33;Q53HL4;Q53GT4;B4E357	DKFZp686O1117;DPP3	0.592549	0.650642
Myosin-13	Q9UKX3	MYH13	-0.935603	0.650642
Synaptojanin-2-binding protein	A0A024R670;A0A087WUM0;P57105	SYNJ2BP;SYNJ2BP-COX16	0.42401	0.650642
Kinectin	A0A024R663;Q86UP2	KTN1	0.279576	0.651479
NA	A0A0J9YX62;C9J2C4;A7UJ17;C9JDR7;C9JDX6;F8WCZ4;C9J2P2;B4DNF1	DNAJB6	0.240003	0.651479
Coatomer subunit beta	P35606	COPB2	0.36322	0.651479
X-ray repair cross-complementing protein 5	P13010;Q53T09	XRCC5	0.258684	0.653159
Mitofusin-2	O95140;B7Z3H8	MFN2	0.445076	0.653159
Cytochrome b-c1 complex subunit 6, mitochondrial	Q567R0;P07919	UQCRH	-0.280181	0.653159
Interferon-induced GTP-binding protein Mx1;Interferon-induced GTP-binding protein Mx1, N-terminally processed	P20591;F8W8T1;Q8NAA8	MX1	0.815569	0.653159
Adenosylhomocysteinase	P23526;Q1RMG2	AHCY	0.198531	0.653159
Citrate lyase subunit beta-like protein, mitochondrial	A0A024RE03;Q8N0X4;B4DU60;Q5JVC2	CLYBL	-0.250707	0.653159
Prohibitin-2	Q99623;J3KPX7;F5GY37;F5GWA7;B4DW05;F5H3X6	PHB2	-0.186627	0.653159
Nucleosome assembly protein 1-like 4	A0A024RCC9;B7ZAK9;B7ZB83;B4DS05;Q99733;B7ZAC7;C9J6D1;C9JZI7;E9PNW0;E9PJJ2;E9PS34;E9PNJ7;A8MXH2;E9PKT8	NAP1L4	-0.242038	0.653159
Alcohol dehydrogenase [NADP(+)]	V9HWI0;P14550	HEL-S-165mP;AKR1A1	0.26267	0.654307
Neuron navigator 1	Q8NEY1	NAV1	0.560577	0.654307
Galectin-3-binding protein	B4DVE1;A0A0S2Z3Y1;Q08380;B3KP88;B4DDG4;B4DWA8;B4DI70;K7EP36	LGALS3BP	-0.334375	0.654307
Exocyst complex component 4	Q6NX51;Q96A65;B7Z321	EXOC4	0.23488	0.656811
Serine beta-lactamase-like protein LACTB, mitochondrial	P83111	LACTB	0.602676	0.656811
Myomesin-3	Q5VTT5	MYOM3	-1.19768	0.656811
Cysteine and glycine-rich protein 3	A2TDB8;P50461	CSRP3	0.274722	0.656811
Cytoskeleton-associated protein 5	Q14008	CKAP5	0.915219	0.662409
Nck-associated protein 1	Q9Y2A7	NCKAP1	0.623492	0.662409
Adenylosuccinate synthetase isozyme 1	Q8N142	ADSSL1	0.260635	0.665888
Glycylpeptide N-tetradecanoyltransferase;Glycylpeptide N-tetradecanoyltransferase 1	Q96HI4;P30419	NMT1	-0.239579	0.665888
60S ribosomal protein L14	P50914	RPL14	-0.385155	0.667476
DnaJ homolog subfamily C member 11	Q9NVH1;B4DPK2;B4DGD5	DNAJC11	0.343131	0.667476
Dehydrogenase/reductase SDR family member 4	Q9BTZ2;D5KJA1;D5KJA2;F5GWZ1	DHRS4;DHRS4L2	0.281095	0.667476
Vascular cell adhesion protein 1	Q53FL7;P19320;E9PDD2	VCAM1	0.428236	0.667476
NADPH--cytochrome P450 reductase	B2R6E5;A8K3B4;Q59ED7;P16435;Q63HL4;B4DKM8;E7EMD0;B4DDH3	POR;DKFZp686G04235	0.744287	0.667476
Tumor suppressor p53-binding protein 1	A6NNK5;Q12888;B7Z3E7;A8KA50	TP53BP1	0.593228	0.667476
NA	J3KNF8	CYB5B	-0.42343	0.667476
Short/branched chain specific acyl-CoA dehydrogenase, mitochondrial	A0A0S2Z3P9;P45954	ACADSB	-0.256575	0.667476
Serine/threonine-protein phosphatase 2A 56 kDa regulatory subunit alpha isoform	Q15172	PPP2R5A	0.51306	0.667476
Ras-related protein Rab-21	A0A024RBA9;Q9UL25;Q96GX3	RAB21	0.499555	0.667476
Thymidylate kinase	Q6FGU2;P23919;Q53F55;G5E9E9;H7C312;H7C3A4;H7BZ20	DTYMK	-0.41153	0.667789
Protein VAC14 homolog	Q08AM6;B4DMP4	VAC14	0.449924	0.670013
Protein transport protein Sec24C	G5EA31;A0A024QZM6;P53992;B4DSN3	SEC24C	0.381523	0.670401
Troponin I, cardiac muscle	Q6FGX2;B6D427;P19429;Q6FGU5;K7EN02	TNNI3	-0.519883	0.670401
DNA helicase;DNA replication licensing factor MCM7	B2RBA6;A0A0S2Z4A5;P33993;C6EMX8;B3KUD7	MCM7	0.374412	0.670401
Ras-related protein Rab-5B	A0A024RB09;P61020;Q6FI54	RAB5B	0.221725	0.670401
Phosphorylase b kinase regulatory subunit beta	Q93100	PHKB	0.978633	0.670401
Histone H1.5	P16401	HIST1H1B	0.326017	0.670401
Syntaxin-4	Q12846;B7Z425;C9JFM5	STX4;STX4A	0.581997	0.670401
Proteasome subunit beta type;Proteasome subunit beta type-7	Q6IBT1;E9KL30;Q99436;Q86U62;B2RAQ9;Q5TBG5	PSMB7	-0.304567	0.670401
Cytochrome b-c1 complex subunit 7	P14927;B7Z2R2;E5RHG9	UQCRB	-0.32637	0.675073
DNA fragmentation factor subunit alpha	Q53HN4;O00273;A0A024R4H5	DFFA	-0.632441	0.6755
Tubulin-folding cofactor B	K7EK42;Q99426;K7EP07	TBCB	0.266648	0.675818
NA	L0R512	NCAM2	0.241232	0.675818
Calcium/calmodulin-dependent protein kinase type II subunit delta	D6R938;A0A024RDK3;Q13557;E9PBG7;E9PF82;B7Z2B0;Q4G1A8	CAMK2D	0.162708	0.675818
Laminin subunit gamma-1	A0A024R972;P11047	LAMC1	-0.225765	0.675818
116 kDa U5 small nuclear ribonucleoprotein component	B3KX19;Q6IBM8;Q15029;Q8IXJ3;A8KAP3;B4DZB1;B3KWY2	U5-116KD;EFTUD2;SNRP116	0.301901	0.675818
Rab GDP dissociation inhibitor beta	Q6IAT1;B4DLV7;P50395	GDI2	-0.197724	0.675818
40S ribosomal protein S4;40S ribosomal protein S4, X isoform	Q96IR1;B2R491;P62701;Q53HV1	RPS4X	0.246716	0.676744
Insulin-like growth factor 2 mRNA-binding protein 3	O00425	IGF2BP3	0.44557	0.676744
NA	H7BZE4	MYL7	-0.243285	0.676744
Junction plakoglobin	A0A0S2Z487;A0A024R1X8;P14923	JUP	-0.188714	0.676744
Probable ATP-dependent RNA helicase DDX17	H3BLZ8;Q59F66;Q92841	DDX17	0.228262	0.676907
60S ribosomal protein L31	B2R4C1;P62899;H7C2W9;C9JU56;B7Z4E3;B7Z4C8;B8ZZK4	RPL31	0.367304	0.676907
39S ribosomal protein L46, mitochondrial	Q9H2W6	MRPL46	-0.546625	0.676907
Lamin-B2	Q03252	LMNB2	-0.19873	0.677264
NA	E5KLM1;E5KLL9;E5KLM2;E5KLM0	NA	0.335641	0.677797
Eukaryotic translation initiation factor 1	Q6IAV3;K7EM18;P41567	SUI1;EIF1	0.2641	0.677797
Dihydropyrimidinase-related protein 5	Q53SW3;Q9BPU6	DPYSL5	-0.379206	0.67882
ATP synthase mitochondrial F1 complex assembly factor 2	Q8N5M1;C9J2Q2	ATPAF2	0.287195	0.681583
Collagen alpha-1(XV) chain;Restin;Restin-2;Restin-3;Restin-4	A0A087X0K0;P39059;B3KTP7	COL15A1	-1.19651	0.68268
Trimethyllysine dioxygenase, mitochondrial	Q9NVH6	TMLHE	0.225868	0.683493
Poly(A) RNA polymerase, mitochondrial	Q9NVV4	MTPAP	0.390718	0.684106
Membrane-associated progesterone receptor component 2	O15173	PGRMC2	-0.276624	0.68596
EH domain-containing protein 1	B2R5U3;A0A024R571;Q9H4M9;B4DTR4;B4DMV9;B4DZH9;C9JC03;C9J2Z4;C9JDQ8	EHD1	-0.309001	0.68596
NA	A1L0S7;B7Z6H8	TNS1	0.296223	0.68596
Heme oxygenase 2	Q6IBP2;P30519;B3KSE0;A0A087WT44;I3L159;I3L1F5	HMOX2	-0.62751	0.686116
NA	C9JWC3	SORBS2	0.432181	0.686116
Proteasome subunit beta type-2;Proteasome subunit beta type	A0A140VJS6;P49721;B7Z478;Q59FJ0	PSMB2	-0.253057	0.686116
Heterochromatin protein 1-binding protein 3	Q5SSJ5;X6RGJ2;B0QZK4;Q5SWC8	HP1BP3	-0.217385	0.68671
Bone morphogenetic protein 5	M9VUD0;A8K694;P22003	BMP5	0.651837	0.68671
Tubulin beta chain	Q5JP53;Q5SU16;P07437;B7ZAF0;Q6LC01;B4DY90;Q5ST81;B7ZAK1;Q9BUU9;B4E052;B4DMU8;Q96B85;B4DXZ5;Q1KSF8	TUBB;XTP3TPATP1	0.256882	0.68671
Aldehyde dehydrogenase, mitochondrial	P05091;Q53FB6;B4YAH7	ALDH2	-0.237397	0.687047
Ribosomal protein L19;60S ribosomal protein L19	J3QR09;J3KTE4;P84098;Q53G49;Q8IWR8;J3QL15	RPL19	-0.330346	0.687442
Sulfite oxidase, mitochondrial	B2R6Y2;A0A024RB79;P51687;D6QX84	SUOX	-0.572604	0.687442
ATP-binding cassette sub-family E member 1	P61221;D6R9I9	ABCE1	0.345831	0.687442
Plakophilin-2	Q99959;B8QGS9	PKP2	0.311625	0.687442
ER membrane protein complex subunit 2	Q53HG5;A8K4K9;Q15006	EMC2	0.54011	0.687442
Splicing factor 3A subunit 3	B3KY12;A8K7V1;A8K566;Q12874;Q53HM6;B4DW90	SF3A3	0.318296	0.687442
Parathymosin	A0A158RFU3;P20962;O15256;A2VCM6	PTMS	-0.558487	0.690367
Sialic acid synthase	Q9NR45;V9HW39	NANS;HEL-S-100	0.359386	0.703381
NADH dehydrogenase [ubiquinone] 1 beta subcomplex subunit 6	O95139;A0A087WZX2	NDUFB6	0.24611	0.706283
NA	Q6IPH7	RPL14	-0.221617	0.70684
Cytoplasmic dynein 1 heavy chain 1	Q14204	DYNC1H1	0.200051	0.707344
Protein phosphatase 1 regulatory subunit;Protein phosphatase 1 regulatory subunit 12A	B2RAH5;O14974;A0A024RBF1;F8VZN8	PPP1R12A	0.291099	0.707344
Synaptopodin-2	H0Y9Y3;B9EG60;Q9UMS6	SYNPO2	-0.663443	0.708113
Talin-1	Q9Y490	TLN1	0.244877	0.708113
Methionine-R-sulfoxide reductase B3	F5H7C4;F5H6G9;F5H199;H0YFW5;Q8IXL7;H7C2B7	MSRB3	0.722571	0.708565
Dihydropteridine reductase	A0A140VKA9;P09417;B7Z415;D6RGG7	QDPR	0.359461	0.708565
39S ribosomal protein L43, mitochondrial	A8K4V4;H0Y6Y8;B1AL05;Q8N983	MRPL43	0.429744	0.708565
NADH dehydrogenase [ubiquinone] 1 alpha subcomplex subunit 10, mitochondrial	E7ESZ7;Q7Z518;A8K413;A0A087WXC5;A0A024R4B3;O95299;Q53SW4	NDUFA10	-0.193126	0.710337
Annexin;Annexin A11	Q5T0G8;P50995;Q6ICS0;Q59EP1;B7Z6L0;B4DPJ2	ANXA11	-0.213096	0.712141
Cullin-associated NEDD8-dissociated protein 2	O75155	CAND2	0.393614	0.712141
Sepiapterin reductase	P35270;B4DSF0	SPR	-0.581899	0.712224
39S ribosomal protein L22, mitochondrial	E7ESL0;J3KQY1;Q9NWU5	MRPL22	0.505912	0.712224
Glutathione peroxidase;Glutathione peroxidase 3	A0A087X1J7;P22352	GPX3	-1.14397	0.712224
Adenylyl cyclase-associated protein 2;Adenylyl cyclase-associated protein	P40123;Q5JPJ8;A0A087X0J3;A0A087WZ15;E9PDI2;B7Z4M3;B7Z385	CAP2;DKFZp686D0714	0.40406	0.712224
Catenin delta-1	C9JZR2;O60716;Q68DU0;Q96FS1;Q7KZJ3;A0A024R4Z0;A0A024R4Y7	CTNND1;DKFZp781O2021	-0.349855	0.714424
Transitional endoplasmic reticulum ATPase	V9HW80;P55072;Q96IF9;Q0IIN5;Q9NTC4	HEL-S-70;VCP;DKFZp434K0126	0.188101	0.714424
NA	S4R3H4;B4DQZ7	ACIN1	0.625735	0.719264
Methylglutaconyl-CoA hydratase, mitochondrial	Q13825	AUH	0.231595	0.719316
Septin-5	G3XAH0;Q59GE1;C9JM82;B4DJ62;X5DNA9;Q7KYV2;Q99648;Q99719;E7EPG2;E7EX32	SEPT5;CDCrel-1	0.308653	0.719316
Signal transducing adapter molecule 1	B2RAY1;Q92783;B4DZT2;A6NMU3	STAM	0.69032	0.719316
Nucleolysin TIAR	O15187;Q2TSD2;A8K5C4;Q01085;A6NKZ9;E7ETJ9;E7ETC0;Q59G49;Q49AS9	TIAL1	0.391214	0.721816
Phosphatidylinositol 4-kinase alpha	B4DYG5;Q4LE69;P42356;D3DX33	PIK4CA variant protein;PI4KA;hCG_1999854	-0.402972	0.721816
Barrier-to-autointegration factor;Barrier-to-autointegration factor, N-terminally processed	A0A024R5H0;O75531;B2R4V4	BANF1	0.703246	0.721816
Transcription elongation factor B polypeptide 1	E5RHG8;A0A024R7Y5;Q15369;R4GMY8	TCEB1	0.299212	0.721893
Activator of 90 kDa heat shock protein ATPase homolog 1	O95433;H0YJG7;H0YJ63;G3V438	AHSA1	0.377234	0.721893
Carbonyl reductase [NADPH] 1	P16152;E9PQ63;A8MTM1	CBR1	0.38758	0.721893
28S ribosomal protein S14, mitochondrial	O60783;B2R4A5	MRPS14	0.30685	0.721893
ER membrane protein complex subunit 1	Q8N766	EMC1	0.439377	0.721893
Protein-glutamine gamma-glutamyltransferase 2	V9HWG3;P21980;B4DIT7;B4DTN7	HEL-S-45;TGM2	0.210645	0.721893
Trifunctional purine biosynthetic protein adenosine-3;Phosphoribosylamine--glycine ligase;Phosphoribosylformylglycinamidine cyclo-ligase;Phosphoribosylglycinamide formyltransferase	Q3B7A7;Q59HH3;P22102;Q15374	GART	-0.588367	0.721893
Myosin regulatory light chain 2, ventricular/cardiac muscle isoform	Q6IB42;P10916;Q14908;Q7Z3Z1;G3V1V8	MYL2	-0.332734	0.721893
Alpha-aminoadipic semialdehyde synthase, mitochondrial;Lysine ketoglutarate reductase;Saccharopine dehydrogenase	A4D0W4;Q9UDR5;F8WAH1;F8WE53	AASS	0.255939	0.721893
40S ribosomal protein S20	P60866;E5RJX2;E5RIP1	RPS20	0.203857	0.721893
Splicing factor 3A subunit 1	A0A024R1K8;Q15459;B4E091	SF3A1	-0.367249	0.721893
Copper chaperone for superoxide dismutase;Superoxide dismutase [Cu-Zn]	J3KNF4;O14618;E9PP76	CCS	0.367975	0.721893
Transmembrane emp24 domain-containing protein 4	Q7Z7H5	TMED4	-0.30959	0.721893
Myosin-binding protein C, cardiac-type	B6D425;A8MXZ9;Q14896;A0A0A0MQU5;F5GZR4;B4DNB5	MYBPC3	-0.231029	0.721893
Beta-2-microglobulin;Beta-2-microglobulin;Beta-2-microglobulin form pI 5.3	B4E0X1;P61769;H0YLF3;A6XMH5;F5H6I0;A6XND9;A6XMH4	B2M	-0.501483	0.721893
Actin-related protein 2/3 complex subunit 4	F8WCF6;P59998;F8WDD7;Q9H7Z5	ARPC4-TTLL3;ARPC4	0.255536	0.721893
NADH dehydrogenase [ubiquinone] 1 alpha subcomplex subunit 13	Q9P0J0;B4DEZ3;K7EJE1;E7ENQ6;B4DQP1	NDUFA13	-0.32002	0.721893
Ubiquitin-protein ligase E3A	Q9H2G0;Q5W7F7;Q9BUI6;Q05086;A0A1B0GVL3;A0A0D9SG77;Q96GR7	UBE3A	-0.25555	0.721893
Prolyl endopeptidase	P48147	PREP	0.227591	0.721893
High mobility group protein B2	Q5U071;P26583;D6R9A6	HMGB2	0.311681	0.721893
Transmembrane protein 14C	Q53F27;A0A024R001;Q9P0S9	TMEM14C	0.610295	0.721893
Pyruvate kinase;Pyruvate kinase PKM	V9HWB8;P14618;B4DNK4;Q8WUW7	HEL-S-30;PKM;PKM2	0.15614	0.721893
WD repeat-containing protein 37	Q9Y2I8;C9JGR9;E7EQ49;A0A087WTQ2	WDR37	0.317912	0.721893
Protein disulfide-isomerase A6	Q15084	PDIA6	0.21844	0.724908
DDB1- and CUL4-associated factor 7	P61962;B4DH46;A0A087WWI6	DCAF7	0.240367	0.726822
Long-chain fatty acid transport protein 6	B2R8P6;Q9Y2P4	SLC27A6	0.355123	0.726822
NADH dehydrogenase [ubiquinone] 1 beta subcomplex subunit 10	A8K761;O96000;H3BPJ9;H3BV16	NDUFB10	0.222549	0.726822
Septin-10	E7EW69;A8K7M3;E7EX04;B5ME97;Q9P0V9;B7Z371;Q59H84;Q9H9P7	43353	0.51524	0.726822
ADP/ATP translocase 3;ADP/ATP translocase 3, N-terminally processed	Q6I9V5;P12236;Q59EI9	SLC25A6	0.1747	0.728984
Paraplegin	Q9UQ90	SPG7	0.351128	0.728984
Cysteine desulfurase, mitochondrial	Q5QP19;Q53FP3;Q9Y697;B2R5S3;B4DNL7;F2Z2E7	NFS1	-0.285275	0.729309
MICOS complex subunit MIC19	A4D1N4;C9JRZ6;Q9NX63;F8WAR4;B7Z1X9	CHCHD3	-0.211854	0.729309
AP-2 complex subunit alpha-2	B7Z5S9;O94973;A0A0G2JS82;A0A0G2JQM1;B7Z1Q4	AP2A2	0.384461	0.72932
Regulator of nonsense transcripts 1	A0A024R7L5;A0A024R7L8;Q92900	UPF1	-0.341569	0.72932
Moesin	V9HWC0;P26038;Q6PJT4	HEL70;MSN	0.246872	0.72932
Fibrinogen alpha chain;Fibrinopeptide A;Fibrinogen alpha chain	P02671;A0A0S2Z3E8	FGA	-0.839119	0.72932
Transmembrane protein 43	A0A024R2F9;Q9BTV4;A0A0S2Z5N2;Q8TEP9	TMEM43;FLJ00144	-0.398328	0.731225
Acyl-CoA-binding protein	P07108;B8ZWD1;A0A024RAF2;A0A0A0MTI5;B8ZWD9;B8ZWD8	DBI	0.405246	0.731225
26S protease regulatory subunit 4	Q53XL8;Q53HB3;P62191	PSMC1	0.215734	0.731225
NADH dehydrogenase [ubiquinone] 1 beta subcomplex subunit 9	Q9Y6M9;E9PH64	NDUFB9	0.241216	0.731225
60S ribosomal protein L9	D6RAN4;Q53Z07;P32969;H0Y9V9;B4E1M5;E7ESE0;B4DLV8	RPL9	0.318212	0.731225
NADH dehydrogenase [ubiquinone] 1 alpha subcomplex subunit 8	P51970;B7Z768	NDUFA8	-0.366542	0.731954
Isoleucine--tRNA ligase, cytoplasmic	Q59G75;P41252;J3KR24;A0A0A0MSX9;Q7Z3U5;Q7Z355;Q6P0M4;B4DVX2;Q7L4K8	IARS;DKFZp686L0869;DKFZp686L17145	0.320683	0.731954
Pyridoxal kinase	V9HWC3;O00764;F2Z2Y4	HEL-S-1a;PDXK	0.290691	0.732947
Nucleoporin Nup43	A0PJK4;B3KTT0;Q8NFH3	NUP43	-0.353796	0.732947
Transcription elongation factor SPT5	B4E0Q4;B4DZJ7;O00267;B4DJK4	SUPT5H	0.381478	0.732947
Endothelial differentiation-related factor 1	O60869	EDF1	0.467654	0.732947
Hemopexin	P02790;Q9BS19	HPX	-1.03528	0.733279
Dynactin subunit 1	E7EX90;Q14203;Q6MZZ3;Q6AWB1;Q6AWB3	DCTN1;DKFZp686I0746;DKFZp686E0752;DKFZp686E191	0.276081	0.735068
Acetyl-CoA acetyltransferase, mitochondrial	A0A140VJX1;P24752	ACAT1	-0.267036	0.735068
TBC1 domain family member 4	A0A024R637;O60343	TBC1D4	0.280228	0.735068
39S ribosomal protein L45, mitochondrial	A0A087X2D5;B4DEF8;Q9BRJ2;A0A0G2JMS5;A0A087WU62	MRPL45	0.244449	0.735068
Annexin;Annexin A2;Putative annexin A2-like protein	V9HW65;A0A024R5Z7;P07355;H0YN42;H0YMD0;H0YMU9;A6NMY6;H0YM50;H0YKS4;B3KRQ1;H0YN28;H0YL33;H0YNP5;B4DNH8	HEL-S-270;ANXA2;ANXA2P2	-0.293415	0.735163
Serine--tRNA ligase, mitochondrial	M0QWZ7;Q9NP81;M0R2C6;B4DXB9;M0R259;A0A024R0H0	SARS2	-0.481681	0.736389
Serine--tRNA ligase, cytoplasmic	Q0VGA5;Q53HA4;Q5T5C7;P49591	SARS	0.408495	0.736519
Bcl-2-like protein 13	Q9BXK5;A0A087WX97;A0A087WTL4;E9PDD6;B2RB43	BCL2L13	0.264439	0.736519
Syntaxin-7	O15400;B4DH37	STX7	0.367224	0.736519
Prostaglandin reductase 2	V9HW32;Q8N8N7;G3V3Y1	HEL-S-298;PTGR2	0.703853	0.736519
Neural cell adhesion molecule 1	A0A087WWD4;P13591;A0A087WX77;A0A087WV75	NCAM1	0.284297	0.736519
Lamina-associated polypeptide 2, isoforms beta/gamma;Thymopoietin;Thymopentin	A0A024RBE7;P42167;G5E972	TMPO	-0.313822	0.736519
Titin	Q8WZ42	TTN	-0.183895	0.736519
Serine/arginine-rich splicing factor 1	J3KTL2;Q07955;Q59FA2;A8K1L8	SRSF1	-0.269344	0.736519
Small ubiquitin-related modifier;Small ubiquitin-related modifier 2	A0A024R8S3;P61956	SUMO2	-0.358382	0.736519
Apoptosis-inducing factor 1, mitochondrial	O95831;E9PMA0	AIFM1	-0.181333	0.736519
Glycogen debranching enzyme;4-alpha-glucanotransferase;Amylo-alpha-1,6-glucosidase	A0A0S2A4E4;P35573;A0A0M4G3H8;G1UI17	AGL	-0.182655	0.736519
Pleckstrin homology domain-containing family A member 6	Q5VTI5;A0A1B0GUN5;Q9Y2H5	PLEKHA6	-0.568901	0.736519
40S ribosomal protein S6	Q96DV6;A2A3R6;P62753;A2A3R5	RPS6	-0.278264	0.736519
Receptor expression-enhancing protein;Receptor expression-enhancing protein 5	B7Z6B3;B2R6C4;Q00765;B7Z2A3	REEP5	-0.583642	0.736519
28S ribosomal protein S36, mitochondrial	P82909	MRPS36	0.192188	0.736519
Adipocyte plasma membrane-associated protein	Q9HDC9;H0Y512	APMAP	0.437789	0.736519
NA	A0A0J9YXC7	NA	0.230078	0.737335
60S ribosomal protein L36	Q9Y3U8;J3QSB5	RPL36	0.204619	0.737799
Protein syndesmos	B2RD96;Q9BRJ7;K7ENA3;K7EIN2;W4VSQ8	NUDT16L1	0.386395	0.738147
RNA-binding protein 25	P49756	RBM25	0.231363	0.739098
ADP-ribosylation factor 6	Q5U025;P62330;Q6FH17	ARF6	0.309997	0.739098
DNA mismatch repair protein Msh6	P52701;A0A087WWJ1;Q1L838	MSH6;GTBP	0.605146	0.739098
Eukaryotic translation initiation factor 3 subunit K	Q9UBQ5;K7ES31;K7ERF1;B4DVD7;K7EQM4;U3LUI4;A0A087WVB9	EIF3K	-0.252529	0.74116
Eukaryotic translation initiation factor 3 subunit J	A0A024R5S5;O75822	EIF3S1;EIF3J	0.353083	0.741704
ATPase family AAA domain-containing protein 1	Q8NBU5;B4E2J1	ATAD1	-0.255897	0.741704
BolA-like protein 2	Q9H3K6;A0A087WZT3	BOLA2	0.167369	0.74415
40S ribosomal protein S26;Putative 40S ribosomal protein S26-like 1	A0A024RB14;P62854;Q75MH1;Q5JNZ5	RPS26;RPS26P11	0.260799	0.744483
Calmegin	A8K454;A0A140VKG2;O14967;D6RAZ4;B4DRG2	CLGN	0.176455	0.746699
Heat shock protein 75 kDa, mitochondrial	Q59EK6;Q9BV61;A0A140VJY2;Q12931;Q53G55;Q53FS6;Q8N9Z3;K0A7K7;Q5CAQ4;I3L0K7	TRAP1	0.276862	0.750155
Programmed cell death protein 5	O14737;K7ESJ4;K7EQA1	PDCD5	-0.258868	0.750155
D-dopachrome decarboxylase;D-dopachrome decarboxylase-like protein	Q53Y51;P30046;B4DJQ7;J3KQ18;A0A0F7RPW6;B5MC82;B4E259;A6NHG4	DDT;DDTL	0.227145	0.750155
NA	Q6FGX3;A0A024R5H8;Q53ET8	RAB6A	0.236296	0.750155
Eukaryotic translation initiation factor 3 subunit I	Q5U0F4;Q53HU7;Q13347	EIF3I	-0.334033	0.750155
Core histone macro-H2A.1;Histone H2A	O75367;B4DJC3;Q59FH0	H2AFY	0.179713	0.752044
CD166 antigen	Q13740;F5GXJ9;B3KNN9;B4DX43	ALCAM	0.359264	0.752044
Interferon-induced transmembrane protein 1;Interferon-induced transmembrane protein 2;Interferon-induced transmembrane protein 3	H7BYV1;E9PS44;E9PQN9;A0A024R210;Q6IBB0;H9NL19;H9NL12;H9NKY4;P13164;Q01629;Q01628	IFITM2;IFITM3;IFITM1	0.180934	0.752044
Amino acid transporter;Neutral amino acid transporter A	Q9P2X2;Q53F03;B2R7N6;P43007;B7Z9M1;B7Z561	SLC1A4	0.434066	0.752044
Myosin light chain 4	A0A1C7CYY4;P12829;I3L1K6;I3L532;I3L3U1	MYL4	-0.307436	0.752044
Acylamino-acid-releasing enzyme	A0A024R2U9;C9JIF9;P13798;H7C393	APEH	0.245925	0.752044
BTB/POZ domain-containing protein KCTD12	B3KY04;A0A140VJM4;Q96CX2	KCTD12	0.530461	0.752044
Laminin subunit alpha-2	P24043;A0A087WX80;A0A087WYF1;Q59H37	LAMA2	-0.211757	0.752044
Hsp90 co-chaperone Cdc37;Hsp90 co-chaperone Cdc37, N-terminally processed	A0A024R7B7;Q16543;Q6FG59;K7EQA9;K7EKQ2	CDC37	0.52494	0.752044
Collagen alpha-1(III) chain	P02461	COL3A1	-0.510468	0.752044
Leucine--tRNA ligase, cytoplasmic	B4E266;B2RCM2;Q9P2J5;B4DER1;Q9H8E3	LARS	0.25507	0.752044
NADH dehydrogenase [ubiquinone] 1 alpha subcomplex subunit 5	A0A024R745;Q16718;A0A087X1G1;H7BYD0;F8WAS3;C9IZN5	NDUFA5	-0.370791	0.75465
Vasodilator-stimulated phosphoprotein	A0A0S2Z4I9;A0A0S2Z4N8;A0A024R0V4;P50552;A0A0S2Z4I7	VASP	-0.396764	0.756
Voltage-dependent anion-selective channel protein 2	A0A024QZT0;P45880;A0A0A0MR02;A0A024QZN9;B4DKM5;Q5JSD1	VDAC2	0.164841	0.758848
60S acidic ribosomal protein P0;60S acidic ribosomal protein P0-like	A8K4Z4;A0A024RBS2;P05388;Q6NSF2;F8VWS0;Q53HW2;Q53HK9;F8VU65;F8VPE8;G3V210;F8VW21;F8VQY6;F8VRK7;F8VZS0;B4E3D5;Q8NHW5;F8VS58	RPLP0;RPLP0P6	0.241803	0.758848
Glucosidase 2 subunit beta	A0A024R7F1;K7ELL7;B4DJQ5;P14314;A0A0S2Z4D8;A0A0S2Z4W7;A2VCQ4;A0A0S2Z4A0	PRKCSH	0.260856	0.758848
Guanine nucleotide-binding protein G(I)/G(S)/G(T) subunit beta-2	Q6FHM2;P62879;C9JXA5;E7EP32	GNB2	0.41445	0.758848
Nicastrin	Q92542;B4DR82;H0Y6T7;B4DJN0	NCSTN	0.255893	0.760276
Myosin light chain 3	A0A024R2Q5;P08590	MYL3	-0.580589	0.761154
Bleomycin hydrolase	Q13867;K7ES02;K7ESE8;J3KSD8;B4DXF3	BLMH	0.349371	0.761154
Bifunctional glutamate/proline--tRNA ligase;Glutamate--tRNA ligase;Proline--tRNA ligase	P07814	EPRS	0.296453	0.761246
78 kDa glucose-regulated protein	V9HWB4;P11021	HEL-S-89n;HSPA5	-0.137981	0.761557
Striatin-3	Q13033;A0AV58	STRN3	0.301237	0.761784
Eukaryotic translation initiation factor 2 subunit 1	Q53XC0;P05198;G3V4T5;H0YJS4	EIF2S1	0.306896	0.762089
NA	A8K141	CTNNA3	0.396661	0.762089
Keratin, type II cytoskeletal 2 epidermal	CON__P35908;P35908	KRT2	0.296434	0.762089
Annexin A6;Annexin	A0A0S2Z2Z6;P08133;A8K3Q7;B7Z582;Q6ZP35;E7EMC6	ANXA6	-0.134478	0.762089
NA	Q53G79	NA	0.216359	0.76212
SUN domain-containing protein 1	E9PHI4;A0A146IHP0;A4D2Q0;O94901;A7MCZ7;H0Y6N5;H0Y742;B4E278;H7C2K3	SUN1;UNC84A	-0.255165	0.762329
Nicotinate phosphoribosyltransferase	Q6XQN6;G5E977;C9J8U2	NAPRT	0.172158	0.763026
Transforming acidic coiled-coil-containing protein 2	O95359;E7EMZ9;E9PBC6;B2RWP4;B7ZMJ9;Q4VXL8;Q4VXL4;D6RAA5	TACC2	-0.964655	0.764697
Delta(3,5)-Delta(2,4)-dienoyl-CoA isomerase, mitochondrial	Q13011;M0R248	ECH1	-0.256703	0.765254
Hemoglobin subunit alpha	D1MGQ2;P69905;U6A216;E9M4D4;I1VZV6;A0A0K2BMD8;Q4ZGM8;E1B2D1;V9H1D9;Q9BX83;Q96T46	HBA2;HBA1	-0.505876	0.765254
Protein NipSnap homolog 3A	Q9UFN0;B4DW81	NIPSNAP3A	-0.302545	0.765254
Hydroxymethylglutaryl-CoA lyase, mitochondrial	B1AK13;P35914	HMGCL	0.290962	0.765254
Sorbin and SH3 domain-containing protein 1	Q9BX66;B4DTX5;B4E264;A0A0U1RQI5	SORBS1	0.187006	0.765278
NA	A0A024R5W6	TPM1	-0.305382	0.765278
2,3-cyclic-nucleotide 3-phosphodiesterase	A0A024R1T5;P09543	CNP	0.219	0.765831
CLIP-associating protein 1	F8WA11;Q7Z460;B7Z5R7;B7Z4E5;B7Z7Q8;H0Y5T1;Q68D09;B7Z2P0	CLASP1;DKFZp686D1968	0.527934	0.7665
Actin-related protein 2/3 complex subunit 1A	V9HVZ6;Q92747;Q53GB6;A0A0K0K1L3;Q59GQ0;E9PF58;Q75MY0	HEL-68;ARPC1A	0.222551	0.7665
N-acylneuraminate cytidylyltransferase	Q8NFW8;Q53GF0	CMAS	-0.546435	0.7665
Replication protein A 70 kDa DNA-binding subunit;Replication protein A 70 kDa DNA-binding subunit, N-terminally processed	P27694	RPA1	0.288373	0.7665
Transmembrane emp24 domain-containing protein 2	B4DP27;Q6FHT8;Q15363;F5GX39;E7EQ72;B4E020	RNP24;TMED2	0.251896	0.7665
NAD kinase 2, mitochondrial	Q4G0N4;A0A0C4DGV3;A0A024R048;B7Z8V7	NADK2;FLJ30596	0.238597	0.766605
Leiomodin-1	B3KX20;B4E3F8;B4E3S9;B4DIX9;P29536	LMOD1	0.295803	0.766605
Ankyrin-2	I6L894;A0A024RDK2;Q01484;A0A024RDI4;B7Z636;E9PHW9;D6RHE1;A0A0U1RQN6;B7Z651	ANK2	-0.310726	0.766605
60S ribosomal protein L4	P36578;Q53G74;B4DMJ6;H3BM89;B4DFI6;B4DMJ2	RPL4	-0.163356	0.766605
Nuclear protein localization protein 4 homolog	A0A024R8R4;Q8TAT6;B4DG89	NPLOC4	0.285529	0.766605
Phenylalanine--tRNA ligase alpha subunit	Q6IBR2;Q9Y285;K7ER00;K7ER16;K7EPH2	FARSLA;FARSA	0.424625	0.766605
Heat shock protein HSP 90-alpha	K9JA46;P07900;Q2VPJ6;Q8TBA7;Q86U12;O75322;Q96HX7	EL52;HSP90AA1	0.17533	0.766791
cAMP-dependent protein kinase catalytic subunit alpha	A0A024R7J0;P17612;A8K8B9;Q15136;K7ERP6	PRKACA;KIN27	-0.209379	0.766791
Peroxiredoxin-5, mitochondrial	V9HW35;P30044	HEL-S-55;PRDX5	-0.143389	0.766791
Methionine--tRNA ligase, cytoplasmic	A8K492;P56192;B4DF61;B4E0E9	MARS	-0.541547	0.766791
Succinyl-CoA:3-ketoacid-coenzyme A transferase;Succinyl-CoA:3-ketoacid coenzyme A transferase 1, mitochondrial	A0A024R040;P55809;Q6IAV5;E9PDW2;B7Z609	OXCT1;OXCT	0.183794	0.766791
Ras-related protein Rab-27A	Q6IAS8;A2RU94;P51159;H3BN55;H3BUD9;H3BS49;H3BVH7	RAB27A	-0.320605	0.766791
Structural maintenance of chromosomes protein;Structural maintenance of chromosomes protein 3	Q86VX4;Q9UQE7;B0AZQ4	SMC3	-0.293546	0.766791
ATPase inhibitor, mitochondrial	Q9UII2	ATPIF1	-0.509021	0.766791
Exocyst complex component 8	Q8IYI6	EXOC8	0.335113	0.766791
Translation initiation factor IF-2, mitochondrial	P46199;Q6P1N2;Q8IWH1	MTIF2	0.196592	0.766791
RNA-binding protein 12	Q69YJ7;Q9NTZ6;B4DRP9;B3KQH4	DKFZp667H197;RBM12	0.336085	0.766791
Cadherin-13	B7Z9B1;P55290	CDH13	-0.734139	0.766791
2,4-dienoyl-CoA reductase, mitochondrial	A0A024R9D7;Q16698	DECR1	-0.201506	0.766791
NA	A0A0U1RQK4	NA	0.305797	0.766791
RNA-binding protein Musashi homolog 2	B4DHE8;Q96DH6;B4DM51	MSI2	0.356402	0.766791
STE20-like serine/threonine-protein kinase	Q9H2G2	SLK	0.416646	0.766791
Acyl carrier protein, mitochondrial;Acyl carrier protein	O14561;H3BNK3	NDUFAB1	-0.254451	0.766791
Myosin-10	P35580	MYH10	0.147676	0.766791
Rho GTPase-activating protein 1	Q07960;B4DPZ4;H0YE29	ARHGAP1	0.258453	0.766791
Mitochondrial import inner membrane translocase subunit Tim8 B	Q9Y5J9;G3XAN8	TIMM8B	0.326158	0.766791
Importin subunit alpha;Importin subunit alpha-7	B4DII5;B4DWX3;O60684;Q5TFJ7	KPNA6	0.268709	0.766791
Myosin regulatory light polypeptide 9	Q6IBG1;P24844	MYL9	0.300751	0.766951
40S ribosomal protein S16	P62249;M0R210;M0R3H0;M0R1M5;A0A087WZ27;Q6IPX4	RPS16;ZNF90	0.236003	0.766951
Cold shock domain-containing protein E1	Q9GZV0;A0A024R0K2;A0A024R0E2;O75534;Q96L66;E9PLT0	CSDE1;UNR	0.265827	0.766951
Methionine adenosyltransferase 2 subunit beta	A0A140VJP2;Q9NZL9;A8K7A4;E5RJR3;H7C0X7	MAT2B	-0.227165	0.766951
Dihydropyrimidinase-related protein 3	A0A140VK07;Q6DEN2;Q14195;Q8IXW6	DPYSL3	-0.184196	0.766951
Septin-8	B7ZVZ1;A6NMH6;A6NFQ9;F8W8I8;Q92599;A0A087X142	43351	0.334242	0.766951
Iron-sulfur cluster assembly 2 homolog, mitochondrial	Q86U28	ISCA2	0.250117	0.769536
Septin-2	Q15019;C9J938;C9JB25	43345	0.172744	0.769536
CD59 glycoprotein	E9PNW4;Q6FHM9;E9PR17;P13987	CD59	-0.193802	0.769536
NA	A0A090N8G0	GARS	0.223084	0.769536
Far upstream element-binding protein 2	A0A087WTP3;Q92945;B4DV73;M0R0I5	KHSRP	0.319155	0.770632
Cell division control protein 42 homolog	A0A024RAE4;B4E1U9;P60953;A0A024R9T1;B7ZAY4;B4DMH5;Q5JYX0;Q9UJM1	CDC42;hCG_39634	0.277779	0.770632
Proteasome subunit beta type-3	P49720;A0A087WXQ8;A0A087WY10;A0A087WUL2	PSMB3	0.416403	0.770632
Plasminogen receptor (KT)	Q9HBL7	PLGRKT	-0.232668	0.771296
Translocon-associated protein subunit delta	P51571;A6NLM8	SSR4	0.310296	0.771296
Dual specificity mitogen-activated protein kinase kinase 2	P36507;B3KS97;Q7Z370;G5E9C7	MAP2K2;DKFZp686L02273	-0.461749	0.771418
Dolichyl-diphosphooligosaccharide--protein glycosyltransferase subunit STT3B	Q8TCJ2	STT3B	0.322201	0.774437
Creatine kinase B-type	V9HWH2;V9HW77;P12277;A0A0S2Z471;B4DP56;G3V4N7	HEL-S-29;HEL-211;CKB	-0.354472	0.780066
Ethylmalonyl-CoA decarboxylase	Q9NTX5;H0Y5L2	ECHDC1	0.301839	0.780066
Basigin	B4DY23;Q54A51;P35613;B4DNE1;A0A087X2B5;I3L192;A0A087WUV8	hEMMPRIN;BSG	0.237168	0.780066
Prolargin	Q6FHG6;P51888;Q7Z4B2	PRELP;MST161	0.306207	0.780066
Ras GTPase-activating protein-binding protein 2	A8K6V7;A0A024RDB2;A0A024RDE5;Q9UN86	G3BP2	0.384274	0.780478
Cold-inducible RNA-binding protein	D6W5Y5;K7ENX8;K7ELV6;K7EJV5;Q6ZR81;K7ELT6;B4E2A3;K7EJV1;K7EMY9;K7EPM4;Q53XX5;K7ER40;K7EQR7;Q14011	CIRBP	0.29194	0.781918
Alpha-actinin-4	A0A0S2Z3G9;O43707;Q96BG6	ACTN4	0.29974	0.783499
Phosphopantothenate--cysteine ligase	Q9HAB8	PPCS	0.40582	0.783499
Cytochrome c oxidase subunit 7A2, mitochondrial	Q496I0;D6RIE3;D6RGV5;H0UI06;P14406	COX7A2	-0.33719	0.786827
Palladin	Q8WX93;B2RTX2	PALLD	0.222128	0.787631
U5 small nuclear ribonucleoprotein 200 kDa helicase	O75643;A4FU77	SNRNP200	0.316562	0.788353
SAP domain-containing ribonucleoprotein	P82979;Q567R9;F8VZQ9;H0YHG0;A4D286	SARNP;CIP29;LOC402290	0.182927	0.788586
Mitochondrial chaperone BCS1	Q53EX1;A8JZZ8;A0A024R467;Q9Y276;H7C492	BCS1L	0.331461	0.788586
Oligoribonuclease, mitochondrial	H0YGR4;F5GYG5;Q9Y3B8;H0YG54	REXO2	0.31154	0.788586
Tropomyosin beta chain	P07951;Q5TCU8	TPM2	-0.492597	0.788793
Poly(ADP-ribose) glycohydrolase ARH3	Q9NX46;B4DHV5;B7ZAN4	ADPRHL2	0.408338	0.789022
TSC22 domain family protein 2	O75157	TSC22D2	-0.309846	0.789022
Pyruvate dehydrogenase E1 component subunit beta, mitochondrial	P11177;C9J634	PDHB	-0.160682	0.792958
Lethal(2) giant larvae protein homolog 1	A0A087WW77;Q15334;A0PJG1	LLGL1	-0.296363	0.792958
Clustered mitochondria protein homolog	I3L2B0;K7EIG1;O75153	CLUH	-0.293246	0.792958
DNA topoisomerase 1	P11387;B9EG90	TOP1	0.273	0.792958
NA	Q6ZN40	TPM1	-0.447439	0.792958
NA	A0A0D9SGF6;B4DGT1	SPTAN1	-0.141682	0.792958
Protein SCO1 homolog, mitochondrial	J3QL56;O75880	SCO1	-0.462972	0.792958
PDZ and LIM domain protein 3	A0A0A0MQY0;Q53GG5;A0A087WYF8	PDLIM3	-0.376063	0.792958
Mitochondrial import receptor subunit TOM40 homolog	A0A024R0P9;O96008;K7EKG4;K7EJ57	TOMM40	0.242579	0.79622
Eukaryotic initiation factor 4A-I	A8K7F6;P60842;A8K088;J3KT12;Q59F68;J3KTB5;J3QS69;J3QL43;B4DNH2;J3QR64	EIF4A1	0.134731	0.79622
Protein arginine N-methyltransferase 1	E9PKG1;Q5U8W9;H7C2I1;Q99873;A0A087X1W2;E9PIX6;B4DJ87	PRMT1;HRMT1L2	0.300982	0.79622
GTP:AMP phosphotransferase AK3, mitochondrial	Q7Z4Y4;Q9UIJ7;Q7Z531	AK3	-0.191421	0.79622
Ribosomal protein S6 kinase alpha-3	B4DKZ2;B4DG22;B7ZB17;P51812	RPS6KA3	-0.320941	0.79622
Aminoacyl tRNA synthase complex-interacting multifunctional protein 1;Endothelial monocyte-activating polypeptide 2	Q12904;B4DNK3	AIMP1	-0.442046	0.79622
Nidogen-2	Q14112;A0A087WZP6;H0YJV3;B4DPX8	NID2	-0.219012	0.798526
Elongation factor 1-alpha 2	Q05639;Q59GP5	EEF1A2	-0.982238	0.798526
Alpha-parvin	J3KNQ4;Q9NVD7;B7Z952;E9PS97	PARVA	-0.254925	0.798873
Propionyl-CoA carboxylase beta chain, mitochondrial	E7EX59;E9PDR0;Q59GV0;P05166;E7EUY3;E7ETT1;C9JQS9;A0A1B2JLU8;E7ETT4;B7Z8A8;E9PEC3;F8WBI9;B7Z7U9;Q9HBR7	PCCB	-0.222109	0.799379
Alpha-actinin-2	P35609;B7Z2N5;B7Z4P6;Q59FD9;B7Z4K1;F6THM6	ACTN2	-0.177146	0.801125
Thiosulfate sulfurtransferase/rhodanese-like domain-containing protein 1	Q8NFU3;R4GNF9	TSTD1	0.341697	0.801322
Isochorismatase domain-containing protein 1	Q96CN7;D6RGE2;Q9Y3B5	ISOC1	-0.176871	0.801322
Tubulin beta-2B chain	Q9BVA1	TUBB2B	0.162769	0.801322
Thioredoxin domain-containing protein 5	A0A024QZV0;Q86UY0;Q6EHZ3;Q658S9;Q8NBS9	hCG_1811539;TXNDC5;STRF8;DKFZp666I134	-0.527494	0.801322
Very-long-chain (3R)-3-hydroxyacyl-CoA dehydratase 3	Q9P035;H3BS72;H3BPZ1	HACD3	0.217888	0.801322
Mitogen-activated protein kinase;Mitogen-activated protein kinase 1	Q1HBJ4;P28482;B4DHN0;Q499G7	MAPK1	0.238137	0.801322
NADPH:adrenodoxin oxidoreductase, mitochondrial	Q6GSK2;P22570;B4DDI9;A0A0C4DFN8;A0A0A0MSZ4;A0A0A0MTR6;A0A0C4DGN7	FDXR	0.287547	0.801322
60S ribosomal protein L3	P39023;Q8TBW1;Q96QL0;B3KS36;Q9NY85;G5E9G0;Q49AJ9;Q9BT63;B5MCW2;H7C422;H7C3M2	RPL3;rpl3	0.130413	0.801322
NA	CON__P02769	NA	-0.222464	0.801322
Eukaryotic peptide chain release factor GTP-binding subunit ERF3A	Q7KZX8;B2RCT6;A8K2W7;P15170;H3BR35	GSPT1	0.355429	0.801322
Elongation factor Ts, mitochondrial	B4DHY8;E5KS95;P43897	TSFM	0.446803	0.801322
Platelet-activating factor acetylhydrolase IB subunit alpha	P43034;B4DZN3	PAFAH1B1	0.179739	0.801322
Microtubule-actin cross-linking factor 1, isoforms 1/2/3/5	H3BPE1;H3BQK9;Q9UPN3;H0Y390	MACF1	0.36398	0.801334
60S acidic ribosomal protein P2	A0A024RCA7;P05387	RPLP2	0.226229	0.801334
Elongation factor 1-gamma	Q53YD7;P26641;B4DUP0	EEF1G	-0.213788	0.801334
X-ray repair cross-complementing protein 6	A0A024R1N4;P12956;B1AHC9;B2RDN9;B4DE32;B4E356	XRCC6	-0.273894	0.805008
NA	H0Y2W2	ATAD3A	0.251477	0.805008
Amyloid beta A4 protein;N-APP;Soluble APP-alpha;Soluble APP-beta;C99;Beta-amyloid protein 42;Beta-amyloid protein 40;C83;P3(42);P3(40);C80;Gamma-secretase C-terminal fragment 59;Gamma-secretase C-terminal fragment 57;Gamma-secretase C-terminal fragment 50;C31	H7C0V9;B4DJT9;A0A0A0MRG2;B4DQM1;E9PG40;B4DGD0;A0A140VJC8;P05067;B4DM00;B4DMD5	APP	-0.331876	0.805171
ADP-ribosylation factor-like protein 2	Q53YD8;P36404	hCG_23373;ARL2	-0.336397	0.805171
Mitochondrial Rho GTPase 1;Mitochondrial Rho GTPase	Q8IXI2;H7BXZ6	RHOT1	-0.344494	0.805171
Transmembrane protein 201	Q5SNT2;H0Y4R5	TMEM201	-0.261505	0.805171
Presequence protease, mitochondrial	B4DH07;Q5JRX3;B4DRW8;A0A0A0MRX9;B3KN37;B3KM51	PITRM1	0.728602	0.805171
NA	B4DE59	NA	0.383029	0.807766
Macrophage migration inhibitory factor	I4AY87;P14174	MIF	-0.213255	0.807766
Tubulin-specific chaperone A	E5RIW3;Q6FGD7;E5RJD8;O75347;E5RHG6	TBCA	0.277776	0.807766
Mitochondrial carrier homolog 2	Q9Y6C9;Q53G34	MTCH2	-0.335922	0.807766
Histone H1.0;Histone H1.0, N-terminally processed	P07305	H1F0	-0.125806	0.807766
Acetolactate synthase-like protein	A1L0T0;M0R026;Q59GP4	ILVBL	0.35898	0.807766
Peptidyl-prolyl cis-trans isomerase FKBP5;Peptidyl-prolyl cis-trans isomerase FKBP5, N-terminally processed	B7Z8G2;Q53GX4;Q2TA84;Q13451;B7Z7Z8	FKBP5	0.345058	0.807766
Catenin alpha-2	P26232;Q49AD3	CTNNA2	0.159351	0.807766
Fumarylacetoacetate hydrolase domain-containing protein 2A;Fumarylacetoacetate hydrolase domain-containing protein 2B	A0A024RE27;Q96GK7;Q6P2I3;D3DXG4;D3DXG5	FAHD2A;FAHD2B;hCG_2002650	-0.239426	0.807766
Translational activator of cytochrome c oxidase 1	Q9BSH4	TACO1	0.419425	0.807766
Cytochrome c oxidase subunit NDUFA4	A0A024R9Z0;O00483	NDUFA4	0.184566	0.807766
39S ribosomal protein L18, mitochondrial	A8K9D2;Q9H0U6	MRPL18	-0.123029	0.807794
40S ribosomal protein S13	P62277;J3KMX5	RPS13	-0.151003	0.807794
Tubulin alpha-4A chain	P68366	TUBA4A	0.24637	0.807794
AP-2 complex subunit alpha-1	O95782	AP2A1	0.311736	0.807794
5-AMP-activated protein kinase catalytic subunit alpha-1	Q13131;Q96E92	PRKAA1	0.241082	0.807794
EMILIN-1	A0A0C4DFX3;Q9Y6C2	EMILIN1	-0.318611	0.808728
Myosin-7	P12883;Q59EV3;Q5GJ54	MYH7	-0.151589	0.808777
Heterogeneous nuclear ribonucleoprotein A3	P51991	HNRNPA3	0.30863	0.810557
14 kDa phosphohistidine phosphatase	V9HWC4;Q9NRX4;Q6FIE5	HEL-S-132P;PHPT1;PHP14	-0.144677	0.81541
Ribosome-recycling factor, mitochondrial	A0A024R850;Q96E11;X6RDS5;A0A024R855	MRRF	-0.238695	0.81541
NA	A5YM51	MYH7	-0.490703	0.818399
Serine-threonine kinase receptor-associated protein	Q9Y3F4;B0AZV0	STRAP	0.262442	0.818399
Enoyl-CoA delta isomerase 2, mitochondrial	Q53HG3;Q53GC8;A0A0C4DGA2;A0A024QZU5;O75521;B4DLL3;Q59E94;Q9NYD2;F1LLU7;F8WAW4;C9JB63	ECI2;PECI;HCA64	0.172255	0.818399
Aspartate aminotransferase;Aspartate aminotransferase, mitochondrial	A0A024R6W0;P00505;B3KUZ8;A8K482	GOT2	-0.189274	0.818399
Probable ubiquitin carboxyl-terminal hydrolase FAF-X;Ubiquitin carboxyl-terminal hydrolase	Q93008;D3DWB6	USP9X	-0.236405	0.818399
Calumenin	Q6IAW5;O43852;B3KQF5	CALU	-0.194559	0.818399
DDRGK domain-containing protein 1	Q96HY6;A0A0A0MRX2	DDRGK1	0.322877	0.818399
Glycerol-3-phosphate dehydrogenase;Glycerol-3-phosphate dehydrogenase, mitochondrial	Q53T76;A0A140VJK2;P43304;A8K1Z2;B7Z601	GPD2	0.202211	0.818399
Probable 2-oxoglutarate dehydrogenase E1 component DHKTD1, mitochondrial	Q96HY7	DHTKD1	-0.451605	0.818399
60S ribosomal protein L32	D3YTB1;A0A024R2G7;F8W727;P62910	RPL32	0.234998	0.818399
28 kDa heat- and acid-stable phosphoprotein	Q13442	PDAP1	0.372962	0.818399
UDP-glucose 6-dehydrogenase	O60701	UGDH	-0.308853	0.818399
E3 UFM1-protein ligase 1	O94874	UFL1	0.312733	0.818399
60S ribosomal protein L18	Q0QEW2;H0YHA7;A0A024QZD1;J3QQ67;Q07020;G3V203;F8VUA6;F8VYV2;B4DDY5;A0A075B7A0	RPL18	-0.151102	0.818399
Clusterin;Clusterin beta chain;Clusterin alpha chain;Clusterin	P10909;H0YLK8;E7ERK6;E7ETB4;H0YC35	CLU	-0.298381	0.818399
Perilipin-3	O60664;A0A140VJN8;K7ERZ3;K7EL96	PLIN3	0.159597	0.818399
A disintegrin and metalloproteinase with thrombospondin motifs 19	Q8TE59;B3KV14	ADAMTS19	0.398661	0.818399
von Willebrand factor A domain-containing protein 8	A3KMH1;B3KT81	VWA8	0.208839	0.818399
Phosphoenolpyruvate carboxykinase [GTP], mitochondrial	Q6IB91;A0A0S2Z430;Q16822;H0YML5;B4DW73;A0A0A0MS74;A0A0S2Z451;H0YM31	PCK2	0.25906	0.818399
Sideroflexin-1	Q9H9B4;D6RFI0	SFXN1	0.214129	0.818399
3-hydroxybutyrate dehydrogenase type 2	A0A024RDG9;Q9BUT1;A8K5M0;A0A024RDJ8;D6R9U8;D6RIR6;B3KY19	BDH2	0.227155	0.818399
Flotillin-1	Q5ST80;O75955;Q6IB58;Q53HQ0;A0A140T9R1;A2VCL5;A0A140T9X0;A2AB09;A2AB10	FLOT1	0.198471	0.818399
G-rich sequence factor 1	A0A024RD99;B7Z2D8;B7Z5F9;B3KP14;H0Y8R1;F5H5I6;B7Z3R7;H0YAK1;B3KW50;Q12849	GRSF1	-0.213214	0.818399
Replication protein A 14 kDa subunit	B5MC59;A4D105;P35244	RPA3	0.213465	0.818399
Peptidyl-prolyl cis-trans isomerase FKBP9	B3KQQ0;A0A090N8P3;O95302;B7Z230;B7Z1U8	FKBP9	0.254741	0.818399
Vimentin	V9HWE1;P08670;B0YJC4;Q53HU8;B3KRK8	HEL113;VIM	-0.218503	0.818399
40S ribosomal protein S21	Q8WVC2;Q6FGH5;P63220;Q9BYK1	RPS21	0.18088	0.818399
Protein AMBP;Alpha-1-microglobulin;Inter-alpha-trypsin inhibitor light chain;Trypstatin	B7Z8R6;P02760;S4R3Y4;S4R471	AMBP	0.560742	0.818399
Beta-2-syntrophin	A0A024R732;Q13425;H0YCS0	SNTB2	0.293283	0.818399
Collagen alpha-2(IV) chain;Canstatin	A0A024RDW8;P08572;B4DH43	COL4A2	-0.200842	0.818399
60S ribosomal protein L26	Q6IBH6;P61254;J3QRI7;J3QQQ9;J3QQV1;J3KTJ8;J3QRC4;A0A024RBF6	RPL26;hCG_26523	-0.173751	0.818399
Tyrosine--tRNA ligase, cytoplasmic;Tyrosine--tRNA ligase, cytoplasmic, N-terminally processed;Tyrosine--tRNA ligase	A0A0S2Z4R1;P54577;A0A0C4DGZ5	YARS	0.204867	0.818399
26S proteasome non-ATPase regulatory subunit 4	P55036;A6PVX3	PSMD4	0.253442	0.818399
Histone H1x	Q92522	H1FX	-0.210191	0.818399
Short-chain specific acyl-CoA dehydrogenase, mitochondrial	E5KSD5;D4QEZ8;P16219;E5KSE7;E9PE82;B4DUH1	ACADS	-0.170176	0.818399
Dynactin subunit 4	A0A0S2Z5B8;A0A0S2Z5D4;Q9UJW0	DCTN4	0.286535	0.818399
E3 ubiquitin-protein ligase HUWE1	A0A024R9U8;A0A024R9W5;Q7Z6Z7;A0A024R9Y3;Q5H924	HUWE1	0.322062	0.818399
Protoporphyrinogen oxidase	P50336;B4DY76;B3KT30;Q96TC9;H0YFP3	PPOX	0.327476	0.818459
26S proteasome non-ATPase regulatory subunit 11	O00231;B4DTS5	PSMD11	0.140472	0.818479
Collagen alpha-1(XII) chain	D6RGG3;Q99715;A0A087X0A8;B9EJB8	COL12A1	0.196893	0.818479
Interferon-inducible double-stranded RNA-dependent protein kinase activator A	O75569;F8WEG8;G5E9Q4;C9JMM3	PRKRA	-0.205784	0.818622
26S protease regulatory subunit 6B	A8K2M0;P43686	PSMC4	0.213612	0.818622
Probable ATP-dependent RNA helicase DDX6	B2R858;P26196	DDX6	-0.210519	0.820487
Filamin-A	P21333;Q5HY54;Q60FE6;Q60FE5	FLNA	0.266046	0.820487
BAG family molecular chaperone regulator 2	B3KN59;O95816;B3KM36	BAG2	-0.401201	0.820487
Histone H2A;Histone H2A type 1-J;Histone H2A type 1-H;Histone H2A.J;Histone H2A type 1-D;Histone H2A type 1	A3KPC7;A0A024RAS2;B2R5B3;A4FTV9;A0A0U1RR32;A0A0U1RRH7;Q99878;Q96KK5;Q9BTM1;P20671;P0C0S8;H0YFX9;B4E0B3	HIST1H2AH;H2AFJ;HIST1H2AK;HIST1H2AJ;HIST1H2AD;HIST1H2AG	-0.207717	0.821459
Host cell factor 1;HCF N-terminal chain 1;HCF N-terminal chain 2;HCF N-terminal chain 3;HCF N-terminal chain 4;HCF N-terminal chain 5;HCF N-terminal chain 6;HCF C-terminal chain 1;HCF C-terminal chain 2;HCF C-terminal chain 3;HCF C-terminal chain 4;HCF C-terminal chain 5;HCF C-terminal chain 6	P51610;A6NEM2	HCFC1	-0.471394	0.821459
Selenocysteine-specific elongation factor	P57772;C9J8T0	EEFSEC	0.37202	0.824079
Fumarate hydratase, mitochondrial	A0A0S2Z4C3;P07954	FH	-0.149706	0.824079
COP9 signalosome complex subunit 7a	Q9UBW8;Q567U8;F5GYF7;F5H248;F5H7C6	COPS7A	-0.24875	0.826924
Eukaryotic translation initiation factor 4 gamma 2	D3DQV9;Q59G42;B4DZF2;P78344;H0Y3P2;Q2TU89	EIF4G2;AAG1	0.120164	0.826924
2-oxoisovalerate dehydrogenase subunit alpha, mitochondrial	Q59EI3;B2R8A9;A0A024R0K3;Q6ZSA3;F5H5P2;P12694;F5GXU9;Q658P7	BCKDHA;DKFZp313C0640	-0.175839	0.826924
Calcium-transporting ATPase	A7E2D8;Q68DH9	ATP2B4;DKFZp686M088	0.349601	0.826924
Lipopolysaccharide-responsive and beige-like anchor protein	P50851	LRBA	-0.388481	0.827081
Coiled-coil domain-containing protein 141	Q6ZP82;E7ERF0;B8ZZB3;C9JR62	CCDC141	0.173988	0.827081
Rap1 GTPase-GDP dissociation stimulator 1	P52306;B3KNU0;B7Z2V8;B7Z4M5;Q6U7G8	RAP1GDS1	0.212634	0.827081
Pre-mRNA-processing factor 19	Q9UMS4	PRPF19	-0.213007	0.827081
DnaJ homolog subfamily C member 7	Q99615;B7Z9W6;Q59EH7;A8K4T2;K7EPP7;K7ESP1;K7EIH8	DNAJC7	0.531102	0.827081
Lysine--tRNA ligase	Q15046;Q6ZTI3	KARS	-0.24082	0.827081
NADH dehydrogenase [ubiquinone] 1 alpha subcomplex subunit 12	Q9UI09;Q53HG1;F8VRD8	NDUFA12	-0.173673	0.827081
Methylmalonyl-CoA mutase, mitochondrial	A0A024RD82;P22033;T1WHH0;B2R6K1;A0A0S2Z4X4	MUT	0.160701	0.827081
Hydroxyacylglutathione hydrolase, mitochondrial	H3BPK3;B4DT01;Q16775;H3BPQ4;H3BQW8	HAGH	0.311292	0.827081
Plasminogen activator inhibitor 1 RNA-binding protein	Q8NC51;D3DQ70;Q5VU21;Q63HR1;D3DQ69	SERBP1;DKFZp686P17171	0.357779	0.827081
Septin-6	Q541S4;Q548C9;B1AMS2;Q6B514;B4DZW0;Q8NFH9;Q14141;Q6NT82;B4E049;B4DPT4;Q8NFI2;Q8NFI0	43349	-0.381681	0.827081
Malonyl-CoA decarboxylase, mitochondrial	O95822	MLYCD	0.160067	0.832068
Casein kinase I isoform alpha	V9HW00;P48729;Q05DL3;Q6PJ06;B4E1D9;B4DER9;D6REM4;E7ETM0	HEL-S-77p;CSNK1A1	0.150521	0.832068
Translocon-associated protein subunit alpha	C9J3L8;C9J5W0;B2R6N9;E9PAL7;C9IZQ1;P43307	SSR1	0.171593	0.833344
Utrophin	P46939	UTRN	0.186589	0.833344
Long-chain-fatty-acid--CoA ligase 3	B3KN05;B2RBE0;A0A024R497;O95573	ACSL3	0.268675	0.833344
Fatty acid-binding protein, epidermal	E7DVW5;Q01469;I6L8B7	FABP5	0.190007	0.833344
Hemoglobin subunit beta;LVV-hemorphin-7;Spinorphin	D9YZU5;P68871;C8C504;Q0Z944;Q9BWV6;Q9GZL9;B3VL86;Q14473;Q8IZI0;Q3LR79;Q4TWB7;A0A1B4WRL5;Q9UK54;B3VL31;Q6V0K9;Q52MT0;E9NGZ5;B3VL05;Q4JLR8;B2M1S6;B5ANL9;F8W6P5;Q3Y9I8;Q4TZM4;B3VL17	HBB	0.393138	0.833588
Sec1 family domain-containing protein 1	Q53GW1;Q8WVM8;B7Z738;B7Z5N7	SCFD1	0.531173	0.833588
Keratin, type II cytoskeletal 1	H6VRG3;H6VRG0;H6VRF8;H6VRG1;P04264;H6VRF9;CON__P04264	KRT1	0.292921	0.833588
Interleukin enhancer-binding factor 3	A0A024R7C7;Q12906;F4ZW64;A8K590;F4ZW65;F4ZW66;B4DFG4;Q59GP7	ILF3	0.296548	0.833588
Lysocardiolipin acyltransferase 1	B4DLE7;Q6UWP7;C9K0C3;B4DM26	LCLAT1	0.196077	0.833692
Activated RNA polymerase II transcriptional coactivator p15	Q6IBA2;Q59G24;P53999;B7Z1Z0	PC4;SUB1	0.263162	0.833692
Peptidyl-prolyl cis-trans isomerase;Peptidyl-prolyl cis-trans isomerase F, mitochondrial	B2R6X6;A0A024QZS4;P30405	PPIF	0.207337	0.83448
Ribonuclease inhibitor	A0A140VJT8;P13489;A0A024RC87	RNH1	0.142077	0.83448
Magnesium transporter protein 1	B4DH58;A0A087WU53;Q9H0U3;A8MUP5	MAGT1	0.287232	0.83448
Regulation of nuclear pre-mRNA domain-containing protein 1B	Q9NQG5;A2A2M0	RPRD1B	0.216627	0.83448
NADH dehydrogenase [ubiquinone] 1 beta subcomplex subunit 3	A0A024R413;O43676;C9JKQ2	NDUFB3	0.234983	0.83448
DnaJ homolog subfamily A member 2	A0A024R6S1;O60884	DNAJA2	-0.351037	0.83448
U1 small nuclear ribonucleoprotein A	B2R802;P09012;M0R268;M0QXK2;M0R221;M0R2B8;M0R0G9;B4DDC7	SNRPA	-0.335611	0.83448
Erlin-2	O94905;E5RHW4;E5RJ09	ERLIN2	0.191222	0.835614
Serine/threonine-protein phosphatase;Serine/threonine-protein phosphatase 6 catalytic subunit;Serine/threonine-protein phosphatase 6 catalytic subunit, N-terminally processed	A0A024R861;O00743	PPP6C	-0.231624	0.835614
Sorting nexin-6;Sorting nexin-6, N-terminally processed	A8K885;Q9UNH7;A0A0A0MRI2;B4DJS7;Q5QTQ6;G3V5X9	SNX6	0.220947	0.835614
Septin-9	A0A0S2Z5A5;A0A024R8V0;Q9UHD8;A0A024R8Q0;A0A0S2Z5W9	43352	-0.199553	0.835965
NA	Q5D044;H0UI49;B7Z938	LAMA4	0.22805	0.836609
Myomesin-1	P52179;A8MX12	MYOM1	-0.201579	0.83861
Reticulocalbin-1	V9HW95;Q15293;Q5J7V8	HEL-S-84;RCN1	0.345282	0.83861
Cob(I)yrinic acid a,c-diamide adenosyltransferase, mitochondrial	B2R6J3;Q96EY8;B4DHP4;F5H4Z7;S4R3P5	MMAB	-0.124122	0.83861
Fatty acid synthase;[Acyl-carrier-protein] S-acetyltransferase;[Acyl-carrier-protein] S-malonyltransferase;3-oxoacyl-[acyl-carrier-protein] synthase;3-oxoacyl-[acyl-carrier-protein] reductase;3-hydroxyacyl-[acyl-carrier-protein] dehydratase;Enoyl-[acyl-carrier-protein] reductase;Oleoyl-[acyl-carrier-protein] hydrolase	P49327;A0A0U1RQF0	FASN	0.264143	0.842332
Vesicle-associated membrane protein-associated protein A	A8KA83;Q9P0L0	VAPA	0.327098	0.842332
NADH dehydrogenase [ubiquinone] iron-sulfur protein 3, mitochondrial	O75489;Q53FM7;Q9UF24	NDUFS3;DKFZp586K0821	-0.221066	0.842746
Laminin subunit beta-2	A0A024R319;P55268	LAMB2	-0.159036	0.843818
Histone H2A;Histone H2A type 1-C;Histone H2A type 3;Histone H2A type 1-B/E;Histone H2A type 1-A	Q08AJ9;A0A024R017;Q93077;Q7L7L0;P04908;Q96QV6	HIST1H2AB;HIST1H2AC;HIST3H2A;HIST1H2AA	-0.341104	0.844193
Chloride intracellular channel protein;Chloride intracellular channel protein 1	Q5SRT3;Q53FB0;O00299	CLIC1	-0.181993	0.844193
Obg-like ATPase 1	J3KQ32;Q9NTK5;Q53SQ6	OLA1;PTD004	0.256787	0.844649
Mitochondrial fission regulator 1-like	A0A0S2Z5H6;B4DRE5;Q9H019;E9PLD2;B2RAQ5;C9JF50;E9PLU1;E9PRK5;B3KPT5	MTFR1L	0.216543	0.844649
Glyoxylate reductase/hydroxypyruvate reductase	Q9UBQ7;Q5M7Z5;U3KQ56	GRHPR	-0.143404	0.844649
CTP synthase;CTP synthase 2	A0A024RC00;Q9NRF8	CTPS2	-0.28444	0.844649
DNA-(apurinic or apyrimidinic site) lyase;DNA-(apurinic or apyrimidinic site) lyase, mitochondrial	Q5TZP7;P27695;G3V3M6;G3V5Q1;G3V3C7;A0A0C4DGK8;G3V5M0;G3V359;G3V5D9	APEX1	0.257304	0.844649
Acyl-coenzyme A thioesterase 1	E9KL42;Q86TX2;B4DV16;A1L172;G3V4F2;B7ZMC1	ACOT1	-0.236715	0.844649
Glutamine--fructose-6-phosphate aminotransferase [isomerizing] 1	Q06210	GFPT1	0.286178	0.844649
Hypoxanthine-guanine phosphoribosyltransferase	Q6LET3;A0A140VJL3;P00492	HPRT1	0.209413	0.844649
WD repeat-containing protein 5	P61964	WDR5	0.349591	0.845269
40S ribosomal protein S23	A8K517;P62266;D6RD47	RPS23	-0.152031	0.845269
Pantothenate kinase 4	Q9NVE7;A0A0G2JR38;B4DHW9;E9PHT6;B4DZX1;Q7RTX2	PANK4	0.184073	0.845269
Small nuclear ribonucleoprotein Sm D3	P62318;H3BT13	SNRPD3	-0.230517	0.845269
Dolichyl-diphosphooligosaccharide--protein glycosyltransferase subunit DAD1	F5GXX5;P61803;Q53G02;F5H895;A0A0B4J239	DAD1	0.161745	0.845269
Double-strand-break repair protein rad21 homolog	A0A024R9J0;O60216	RAD21	-0.196109	0.845269
Peptidyl-prolyl cis-trans isomerase;Peptidyl-prolyl cis-trans isomerase-like 3	A0A024R3V4;Q9H2H8;B8ZZ77;A0A0S2Z5A8;H7BZ14;B4DN80;C9K058	PPIL3	0.347222	0.845269
Dynein light chain 1, cytoplasmic	Q6FGH9;P63167;F8VXL2;F8VRV5	DNCL1;DYNLL1	-0.214676	0.845269
ATP-dependent (S)-NAD(P)H-hydrate dehydratase	B4DKX7;A0A024RDX4;Q8IW45;B3KSJ9	CARKD;FLJ10769	0.211724	0.848573
Acyl-CoA synthetase family member 2, mitochondrial	Q96CM8;E9PF16;B4DTB9	ACSF2	-0.238519	0.848573
Nuclear pore membrane glycoprotein 210	Q8TEM1	NUP210	-0.289687	0.848573
6-phosphogluconolactonase	A0A0K0K1K7;O95336;M0R261	PGLS	0.201674	0.848573
Eukaryotic initiation factor 4A-III;Eukaryotic initiation factor 4A-III, N-terminally processed	A0A024R8W0;P38919	DDX48;EIF4A3	0.21236	0.848573
Omega-amidase NIT2	V9HW91;Q9NQR4	HEL-S-8a;NIT2	0.216771	0.848573
ATP-dependent RNA helicase DDX1	A3RJH1;Q92499;F1T0B3;A0A087X2G1;B4DP70	DDX1	-0.20139	0.849022
Calreticulin	Q53G71;V9HW88;P27797;B4DHR1;K7EJB9;B4E2Y9	HEL-S-99n;CALR	0.24702	0.849675
Phospholipase D3	A0A024R0Q4;Q8IV08;B4DEL6	PLD3	0.248852	0.849675
ATP synthase subunit e, mitochondrial	P56385	ATP5I	0.200929	0.849675
Heterogeneous nuclear ribonucleoprotein U-like protein 2	Q1KMD3;H3BQZ7	HNRNPUL2;HNRNPUL2-BSCL2	-0.132442	0.849712
Fibrillin-2	P35556;A0A087WYV8;D6RJI3	FBN2	0.205693	0.849712
NA	Q6ZR64;K7EQX8	MXRA7	-0.266759	0.849712
E3 ubiquitin-protein ligase TRIM63	Q6NR77;Q969Q1	TRIM63	0.250548	0.85204
NADH dehydrogenase [ubiquinone] flavoprotein 3, mitochondrial	P56181	NDUFV3	-0.413837	0.85204
Calcium/calmodulin-dependent protein kinase type II subunit alpha	Q8IWE0;Q7LDD5;Q9UQM7;A8K161	CAMK2A	0.26803	0.85204
Transmembrane emp24 domain-containing protein 9	B2R8A2;A0A024R7M0;Q9BVK6	TMED9	0.171039	0.85204
ATP-dependent RNA helicase DDX42	Q86XP3;A0A0A0MSJ0	DDX42	0.161267	0.852916
NA	V9HVZ7	HEL-176	0.409948	0.852916
Desmin	Q53SB5;A5Z217;P17661;Q45VM8;Q45VM7;Q45VM6;Q9H319;L7RDA5;B4DUI0	tmp_locus_29;DES	0.172748	0.852916
60S ribosomal protein L18a	M0R117;B4DM74;Q02543;M0R3D6;M0R1A7;B4DM94;B4DUV3;B2R4C0;Q53HD3;M0R0P7;Q32XH3	RPL18A	0.119377	0.852916
28S ribosomal protein S35, mitochondrial	P82673	MRPS35	-0.36956	0.852916
Sarcalumenin	B4DYT9;Q86TD4;B3KPP4	SRL	-0.346031	0.853386
Coatomer subunit gamma-1	Q9Y678;Q8WUI6;B3KW21	COPG1;COPG	0.285951	0.853631
Mitochondrial antiviral-signaling protein	Q7Z434	MAVS	0.171513	0.85388
Sorting nexin-12	Q3SYF1;A0A087X0R6;Q9UMY4	SNX12	0.285801	0.85388
Staphylococcal nuclease domain-containing protein 1	A0A140VK49;Q7KZF4;B2R5U1;Q59FF0;B4E299;B3KU67	SND1	0.122878	0.85388
MICOS complex subunit MIC10	A0A087WU07;Q5TGZ0;R4GMM1;R4GNA1	MINOS1;MINOS1-NBL1	-0.139635	0.85388
Mitochondrial import inner membrane translocase subunit Tim21	A8K1K8;Q9BVV7	C18orf55;TIMM21	0.17795	0.85388
Drebrin	Q16643;D6R9W4;B3KSQ7	DBN1	0.258123	0.85388
NA	A8K6S3	NA	0.226109	0.85388
Popeye domain-containing protein 2	Q9HBU9;C9J3P7	POPDC2	0.277984	0.85388
Serine/arginine-rich splicing factor 5	A0A024R6D8;Q59EK7;Q13243;B4DJK0;B4DUA4	SFRS5;SRSF5	0.270167	0.85388
Endophilin-A2	Q9UQD4;Q6FGM0;Q99961;M0QYE0;M0R0I3	SH3GL1	-0.203685	0.85517
Phosphoribosyl pyrophosphate synthase-associated protein 2	B2R7R5;A0A024QYY3;O60256;I3L0S1;E7EPA1;C9K0K7;C9JJS3	PRPSAP2	0.211328	0.85517
ATP synthase subunit epsilon-like protein, mitochondrial;ATP synthase subunit epsilon, mitochondrial	Q5VTU8;P56381	ATP5EP2;ATP5E	-0.263216	0.85517
Cytochrome b-c1 complex subunit 8	O14949;B7Z4A1	UQCRQ	-0.206679	0.85517
NADH dehydrogenase [ubiquinone] 1 alpha subcomplex subunit 7	Q6FG42;Q32Q14;O95182;Q6IB89	NDUFA7	0.426582	0.85517
NADH dehydrogenase [ubiquinone] 1 alpha subcomplex subunit 6	A0A0C4DGS0;P56556;R4GN43	NDUFA6	0.260218	0.856276
NEDD8	E9PL57;F8VSA6;E9PS38;S4R3E9;Q15843	NEDD8-MDP1;NEDD8	-0.302839	0.856276
Serine/threonine-protein phosphatase 2B catalytic subunit alpha isoform;Serine/threonine-protein phosphatase	A0A0S2Z4C6;Q08209;A0A0S2Z4B5;E7ETC2;Q9UMM5	PPP3CA	0.180913	0.856276
Matrin-3	A0A0R4J2E8;A8MXP9;P43243;D6REM6;Q68D11;D6R991	MATR3;DKFZp686K23100	0.147706	0.856276
Aspartate--tRNA ligase, cytoplasmic	A0A140VJW5;P14868;D3DP78;Q53T60	DARS	-0.154751	0.856276
Selenium-binding protein 1	V9HWG1;Q13228;B4DPI7	HEL-S-134P;SELENBP1	0.304565	0.858587
Troponin T, cardiac muscle	E7EPW4;A0A0A0MRJ5;A0A0A0MRJ4;P45379;Q7Z554;A0A024R953;Q15607;Q15608;E7EPN8	TNNT2;HNTN1	0.204746	0.858587
26S protease regulatory subunit 8	A0A140VJS3;P62195;Q59GS3;J3QSA9;J3QQM1;J3KRP2;J3QLH6	PSMC5	0.167048	0.858587
Aspartyl aminopeptidase	A0A024R442;Q53SB6;E7ETB3;B7Z7F0;Q9ULA0;Q9BSS9;E7EMB6;A0A024R443;Q9NV55;Q9HAC6;B9ZVU2;F8WAN0;B7Z822;E7EPX3;C9JBE1	DNPEP	-0.181067	0.858587
Acyl-CoA dehydrogenase family member 9, mitochondrial	Q9H845;Q9H9W4;H0Y8Z9;Q9BUX5;Q59FN3	ACAD9	0.155608	0.859253
Crooked neck-like protein 1	Q5JY65;Q9BZJ0;Q69YP1;Q8IXG0	CRNKL1;DKFZp762M013;crn	-0.160599	0.85991
Mitochondrial amidoxime reducing component 2	Q969Z3	43161	0.200961	0.85991
Calcineurin B homologous protein 1	A0A024R9M9;Q99653;H0YKE7;F5GX29;H0YNG9;B4DSB5	CHP;CHP1	0.282437	0.85991
Vacuolar protein sorting-associated protein 26A	B4DLT1;O75436;S4R3Q6	VPS26A	0.434648	0.859943
GTP-binding protein RAD	A8K3J8;A0A024R6X0;P55042;Q92788	RRAD	0.181557	0.861156
Dysferlin	O75923	DYSF	-0.158783	0.861156
Mannose-6-phosphate isomerase	H3BPB8;P34949;H3BMZ9;Q8NHZ6;H3BPP3;H3BP57;H3BT48;H3BUZ9;B4DFC4;F5GX71;B4DW50;H3BPM5;H3BPU7;H3BU66;H3BQX0;H3BNY8;H3BT46	MPI	0.208332	0.861289
Dynactin subunit 2	V9HW58;Q53H88;Q13561;B3KTX4;A8K8J9;F8W1I6;H0YI98;F8VW18	HEL-S-77;DCTN2	-0.13643	0.861289
COP9 signalosome complex subunit 1	Q13098;C9JFE4;B4DND6;A0A096LPJ3;A0A096LP07;A8K070	GPS1	0.227565	0.861289
60S ribosomal protein L21	Q6IAX2;P46778;Q59GK9;G3V1B3;M0R181	RPL21	0.214712	0.861289
Glutamine--tRNA ligase	Q53HS0;P47897;A8K3A8;B4DNN3	QARS	0.261022	0.861289
Nuclear pore complex protein Nup93	Q8N1F7;A8K897;H3BVG0	NUP93	-0.226863	0.861289
Tubulointerstitial nephritis antigen-like	F6SDV2;Q9GZM7;B4DVG5	TINAGL1	-0.187675	0.861289
40S ribosomal protein S14	P62263;H0YB22;E5RH77	RPS14	0.181729	0.861289
Poly(rC)-binding protein 2	H3BRU6;F8VZX2;Q15366;B4DRD7	PCBP2	-0.223615	0.861289
ATP synthase subunit alpha;ATP synthase subunit alpha, mitochondrial	V9HW26;P25705	HEL-S-123m;ATP5A1	-0.136573	0.861289
Splicing factor 3B subunit 6	Q9Y3B4	SF3B6	0.176704	0.861289
Gamma-glutamylcyclotransferase	A0A090N7V5;O75223;M0QZK8;B8ZZK2;B3KMN7	C7orf24;GGCT	0.313037	0.861289
UV excision repair protein RAD23 homolog B	P54727;B4DEA3;Q53F10;B7ZA74;B7Z4W4;Q5W0S5	RAD23B	-0.164951	0.861289
Chromodomain-helicase-DNA-binding protein 4	B3KY63;F5GWX5;A0A0C4DGG9;Q14839	CHD4	-0.227905	0.861289
Prelamin-A/C;Lamin-A/C	P02545;Q5I6Y5;Q8N519	LMNA	-0.132529	0.861289
ADP-ribosylation factor-like protein 1	P40616;F8VYN9;B4DZG7;B4DR16	ARL1	0.108302	0.861289
Cytochrome b-c1 complex subunit 9	Q9UDW1	UQCR10	0.166906	0.861289
Mycophenolic acid acyl-glucuronide esterase, mitochondrial	Q9NUJ1	ABHD10	-0.417596	0.861289
Mitogen-activated protein kinase;Mitogen-activated protein kinase 14	A0A024RD15;Q16539;B4E0K5;B5TY33	MAPK14	-0.200567	0.861289
Probable threonine--tRNA ligase 2, cytoplasmic	A2RTX5;B7ZLP8	TARSL2	-0.342366	0.861289
Aldehyde dehydrogenase X, mitochondrial	P30837	ALDH1B1	0.132021	0.861289
Acyl-coenzyme A thioesterase 9, mitochondrial	Q9Y305;H7C5Q2	ACOT9	-0.236531	0.861289
Fructosamine-3-kinase	Q9H479;B4DH12;B3KNR9	FN3K	0.184375	0.861289
Fatty acid-binding protein, heart	S4R371;P05413;Q6IBD7;S4R3A2	FABP3	0.159246	0.861289
NA	B9EH95;Q8NAH4	ARVCF	-0.195173	0.861289
Phosphoglycerate mutase 2;Phosphoglycerate mutase	P15259;A4D2J6	PGAM2	-0.333784	0.861289
Lamin-B1	P20700;E9PBF6;Q6DC98;A0A0D9SFE5	LMNB1	-0.10988	0.861289
Ketimine reductase mu-crystallin	Q14894;I3L325;I3NI53;I3L2W5	CRYM	-0.50096	0.861289
Pogo transposable element with ZNF domain	Q7Z3K3;B4DSK8	POGZ	0.228327	0.861289
Eukaryotic translation initiation factor 3 subunit H	Q6IB98;Q53HR0;Q53HG0;B3KS98;O15372;Q5BKY2;A0A087WZK9;E5RJT0	EIF3S3;EIF3H	0.299405	0.862513
Vesicle-associated membrane protein-associated protein B/C	Q53XM7;O95292	VAPB	-0.205273	0.862513
Cytochrome b-c1 complex subunit 1, mitochondrial	P31930	UQCRC1	-0.134261	0.86285
Cat eye syndrome critical region protein 5	Q9BXW7	CECR5	-0.115885	0.86285
Zinc finger RNA-binding protein	B2RNR6;Q96KR1	ZFR	0.20463	0.86285
Serine/arginine-rich splicing factor 11	Q05BU6;Q6PJY9;Q6PKC9;Q5T760;Q6PJB9;Q05519;B4DWT1;B4DTC1	SFRS11;SRSF11	0.236566	0.86285
Eukaryotic translation initiation factor 2 subunit 3;Putative eukaryotic translation initiation factor 2 subunit 3-like protein	P41091;Q2VIR3;F8W810	EIF2S3;EIF2S3L	0.159945	0.86285
2-oxoglutarate dehydrogenase, mitochondrial	Q02218;A0A0D9SFS3	OGDH	-0.181176	0.86285
Ras-related protein R-Ras	A0A024QZF2;P10301	RRAS	0.12642	0.86285
Calponin;Calponin-1	V9HWA5;P51911;Q53FP8;B7Z7E1;K7EQ72	HEL-S-14;CNN1	-0.230701	0.86285
Casein kinase II subunit alpha	E7EU96;Q5U5J2;P68400;Q2I0Y7;B2R6D7	CSNK2A1	-0.335749	0.86285
Nuclear transport factor 2	A0A024R6Y2;P61970;H3BRV9	NUTF2	0.267292	0.86285
T-complex protein 1 subunit zeta	B2R9K8;A0A024RDL1;P40227;Q59ET3;A1JUI8;B4DPJ8;B4DN39	CCT6A	0.103489	0.86285
Protein CutA	O60888;C9IZG4	CUTA	0.191346	0.86285
60S ribosomal protein L34	A0A024RDH8;P49207	RPL34	-0.163671	0.86285
Signal recognition particle receptor subunit beta	Q549N5;Q9Y5M8;H7C4H2	SRPRB	0.244334	0.86285
Ubiquitin-associated protein 2-like	B4DYY5;F8W726;Q14157;B4DZJ6;Q5VU77	UBAP2L	-0.214649	0.86285
Ran GTPase-activating protein 1	A0A024R1U0;P46060;B4DY16;B4E0U0	RANGAP1	-0.317854	0.86285
Myoglobin	B0QYF8;A0A024R1G3;P02144;F2Z2F1;B2RA67;F2Z337	MB	-0.286652	0.86285
CDK5 regulatory subunit-associated protein 3	Q96JB5;J3QRM1	CDK5RAP3	0.189573	0.86285
NLR family member X1	Q86UT6;B7Z889	NLRX1	0.261598	0.86285
T-complex protein 1 subunit gamma	B3KX11;P49368;Q59H77;Q2TU64;B4DUR8	CCT3	-0.10151	0.86285
Myosin regulatory light chain 2, atrial isoform	Q01449;H7C243	MYL7	0.208844	0.86285
Aspartate--tRNA ligase, mitochondrial	A8K4A8;A0A024R8Z9;Q6PI48;Q9H9J7;Q9NVT8	DARS2	0.165588	0.86285
WD repeat-containing protein 44	Q5JSH3;Q8N397;H7BY83;B7Z947	WDR44;DKFZp761M142	-0.321466	0.86285
Glutathione S-transferase kappa 1	Q6FII1;Q9Y2Q3;Q2NLC8;E9PFN5;C9JNT3	LOC51064;GSTK1	-0.449278	0.86285
Dihydropyrimidinase-related protein 4	O14531;D3DRG7;Q5T0Q6	DPYSL4	-0.190812	0.86285
Alpha-adducin	E7EV99;E7ENY0;P35611;Q96D30;A0A0A0MSR2;Q4TT76;H0Y9H2	ADD1;LA04NC01-25A3.2-001	0.125893	0.86285
Propionyl-CoA carboxylase alpha chain, mitochondrial	P05165;B2RDE0;A0A1B0GU58;A0A1B0GWI4;A0A1B0GUX9;A0A1B0GWA1	PCCA	0.141006	0.86285
Malectin	Q14165;F5H1S8;H0YG07	MLEC	-0.211967	0.86285
Ras GTPase-activating protein-binding protein 1	Q6FI03;Q5U0Q1;Q13283;Q32P45;Q53HH4;B7Z8K4	G3BP;DKFZp686L1159;G3BP1	-0.151191	0.86285
T-complex protein 1 subunit alpha	P17987;E7ERF2;E7EQR6;F5H282	TCP1	-0.135632	0.86285
Laminin subunit alpha-5	O15230	LAMA5	-0.146026	0.86285
Mitochondrial fission 1 protein	Q9Y3D6	FIS1	0.447512	0.86285
Cytochrome c oxidase subunit 4 isoform 1, mitochondrial	P13073;H3BN72;H3BNV9;H3BPG0;Q86WV2	COX4I1	-0.163635	0.864153
Protein phosphatase 1 regulatory subunit 7	A0A140VK83;Q15435;C9J177;H7C003;C9JD73;B5MBZ8	PPP1R7	0.237774	0.864153
Coiled-coil domain-containing protein 58	Q4VC31;C9JQ41;H7C525	CCDC58	0.197677	0.866658
ATP-binding cassette sub-family B member 10, mitochondrial	Q9NRK6;Q6ZMF8	ABCB10	0.459386	0.867465
Actin-related protein 2/3 complex subunit 3	B4DM63;Q2LE71;B2R4D5;O15145;C9JZD1;F8VR50	ARPC3	0.260113	0.867465
Heat shock protein beta-2	A8KAH6;Q16082	HSPB2	0.12242	0.867465
39S ribosomal protein L11, mitochondrial	Q53G19;Q9Y3B7	MRPL11	0.234409	0.867465
6-phosphogluconate dehydrogenase, decarboxylating	P52209;B4E2U0;B4DL86;K7EM49;A9Z1X1;B4DV68	PGD	0.100117	0.867465
Annexin;Annexin A1	Q5TZZ9;P04083;B5BU38	ANXA1	0.220973	0.867465
Cullin-3	Q53S54;A0A024R475;Q13618;B7Z600	CUL3	0.240679	0.867465
NADH dehydrogenase [ubiquinone] 1 alpha subcomplex subunit 2	O43678	NDUFA2	-0.257445	0.867465
Cystatin-B	Q76LA1;P04080	CSTB	0.167689	0.867465
Laminin subunit alpha-1	P25391	LAMA1	0.281376	0.867465
Tubulin beta-4B chain	Q8IZ29;P68371;Q8N6N5;Q8IWP6;B3KML9;Q96HX0	TUBB2C;TUBB4B	0.0950913	0.867465
Calpain-1 catalytic subunit	P07384;A0A024R5A3;A0A024R580;B2RDI5;B4DWH5	CAPN1	0.211133	0.867465
Eukaryotic translation initiation factor 2 subunit 2	Q6IBR8;P20042;B5BU01	EIF2S2	0.155557	0.867465
NA	Q53GN4;Q59ER5;Q53H17	WDR1	-0.141771	0.867465
Myosin-4	Q9Y623	MYH4	0.194198	0.867465
Protein transport protein Sec61 subunit alpha isoform 1	B3KNF6;B4DR61;P61619;H7C1Q9;C9JXC6;H7C069;A6NK38;F2Z2C7;A6NIF9;C9JJV4	SEC61A1;SEC61A2	0.269948	0.867465
Pre-mRNA 3-end-processing factor FIP1	B4DTW7;Q6UN15	FIP1L1	0.186615	0.867465
Polyribonucleotide nucleotidyltransferase 1, mitochondrial	Q8TCS8	PNPT1	-0.359626	0.867465
Transmembrane 9 superfamily member 4	A0A0C4DFM1;A0A024QYR3;Q92544;B4DKC1;B4DYH6;B4DH88	TM9SF4	-0.227455	0.867465
Synaptogyrin;Synaptogyrin-2	A0A024R8T9;O43760;K7ELD9;K7ENG9;K7ELS8	SYNGR2	-0.237482	0.867465
Golgi apparatus protein 1	Q92896;H3BM42	GLG1	0.197376	0.867465
Sarcoplasmic/endoplasmic reticulum calcium ATPase 2	A0A0S2Z3L2;P16615;H7C5W9	ATP2A2	-0.11167	0.867465
Dual specificity protein phosphatase 3	B5BUI8;P51452	DUSP3	0.18727	0.867465
NADH dehydrogenase [ubiquinone] complex I, assembly factor 7	C9J236;C9JS27;B4DXV9;Q7L592;B4DQY3;C9JP36	NDUFAF7	0.16594	0.867465
NAD(P) transhydrogenase, mitochondrial	Q2TB59;A0A024R0C3;Q13423	NNT	-0.0937763	0.867465
14-3-3 protein zeta/delta	D0PNI1;P63104;E7EX29;B0AZS6;B7Z2E6;H0YB80;E7ESK7	YWHAZ	-0.116042	0.867465
Superoxide dismutase;Superoxide dismutase [Mn], mitochondrial	Q7Z7M4;A0A0C4DFU2;P04179;Q7Z7M6;Q4ZJI1;Q7Z7M7;F5H3C5;F5H4R2;A0A0C4DFU1;F5GYZ5;Q7Z7M5;G8JLJ2;A0A0C4DG56	SOD2	-0.129458	0.867465
2-oxoisovalerate dehydrogenase subunit beta, mitochondrial	B7ZB80;A0A140VKB3;P21953;B4E2N3;A0A0K2GN21	BCKDHB	0.180996	0.867465
Integrin beta-1	P05556	ITGB1	0.118978	0.867465
Melanoma-associated antigen D2	A0A024R9Y7;Q9UNF1;B4DX55;Q5H909;Q5H907	MAGED2	-0.232203	0.867465
T-complex protein 1 subunit beta	V9HW96;P78371;F5GWF6;F8VQ14	HEL-S-100n;CCT2	-0.109108	0.867465
Guanylate kinase	Q6IBG8;B1ANH5;B1ANH0;B1ANG9;A0A024R3U5;Q16774;Q658U3;Q96IN2;B1ANH6;B1ANH2;B1ANH3	GUK1;DKFZp666D023	-0.263942	0.867465
Proteasome subunit beta type-1;Proteasome subunit beta type	A0A140VK45;P20618;Q53FT8	PSMB1	0.139644	0.867465
40S ribosomal protein S3	P23396;Q53G83;E9PL09;E9PPU1;H0YEU2;F2Z2S8;H0YCJ7;Q9NQS8;H0YF32	RPS3	-0.10002	0.867465
NFU1 iron-sulfur cluster scaffold homolog, mitochondrial	Q9UMS0	NFU1	0.164611	0.867465
Interferon regulatory factor 2-binding protein-like	Q9H1B7	IRF2BPL	-0.377612	0.867465
Signal transducer and activator of transcription;Signal transducer and activator of transcription 3	B5BTZ6;P40763;G8JLH9;B4DNP0;B7ZA24;B4DVR6	STAT3	0.169914	0.867465
TIP41-like protein	O75663	TIPRL	0.221751	0.867465
DnaJ homolog subfamily B member 11	Q9UBS4;B3KW63;H7C2Y5	DNAJB11	-0.221016	0.867465
60S ribosomal protein L23a	P62750;H7BY10;K7EJV9;K7ERT8;A8MUS3;K7EMA7	RPL23A	-0.167534	0.867465
Probable global transcription activator SNF2L1	Q86UA8;A0A0A0MRP6;B7ZLQ5;P28370;D7EZH4	SMARCA1	0.240974	0.867465
mRNA export factor	P78406;Q5J8M4;E9PQ57;E9PPG9	RAE1	0.206768	0.867465
Nebulette	O76041;B0YJ47;Q2TBD1	NEBL	-0.185636	0.867465
Peptidyl-prolyl cis-trans isomerase;Peptidyl-prolyl cis-trans isomerase B	V9HWC6;P23284	HEL-S-39;PPIB	0.14727	0.867465
Protein transport protein Sec61 subunit beta	P60468;Q53FA5	SEC61B	0.191926	0.867465
Pleckstrin homology domain-containing family A member 7	E9PKC0;Q6IQ23;H0YDE2;A0A1B0GUN0	PLEKHA7	0.165082	0.867465
Vacuolar protein sorting-associated protein 35	Q96QK1;Q53FR4;Q5HYM2	VPS35;DKFZp686O2462	0.292284	0.867465
Brain acid soluble protein 1	P80723	BASP1	-0.284707	0.867465
Dystrobrevin alpha;Dystrobrevin	Q9Y4J8;A0A024RC32;B7Z3X3;M0QZ28;M0R021	DTNA	0.176362	0.867465
Heterogeneous nuclear ribonucleoprotein K	B4DUQ1;A0A024R228;Q6IBN1;P61978;B4DFF1;Q5T6W2	HNRPK;HNRNPK	-0.20541	0.867465
Tripartite motif-containing protein 55	Q9BYV6	TRIM55	0.325771	0.867465
ATP synthase subunit g, mitochondrial	E9PN17;O75964	ATP5L	-0.126478	0.867465
Katanin p60 ATPase-containing subunit A-like 2	K7EM02;K7EIJ8;Q8IYT4	KATNAL2	0.223284	0.867465
Basal cell adhesion molecule	A0A087WXM8;I7L574;I7KDP0;G0TQY6;A0A0A1TTQ0;P50895;A0A068W6H0;K7ENU8	BCAM;LU	-0.156185	0.867465
Talin-2	Q9Y4G6;A0A1C7CYV7;A0A1B0GVU7;G1UI21;H0YMT1	TLN2	0.162436	0.867465
Cadherin-2	A0A024RC42;P19022	CDH2	0.171718	0.867465
High mobility group protein HMG-I/HMG-Y	B4DWA0;A0A024RCT9;P17096	HMGA1	-0.110635	0.867465
Importin-7	O95373;B3KQG6	IPO7	0.218526	0.867465
Hydroxyacyl-coenzyme A dehydrogenase, mitochondrial	A0A140VK76;A0A0A0MSE2;Q16836;E9PF18	HADH	0.150829	0.867465
Ras-related protein Rab-5A	A0A024R2K1;P20339;A0A0A1HAN9	RAB5A	-0.206574	0.867465
Importin-5	A0A024RDY0;O00410;H0Y8C6;B4E0R6;B3KWG6	RANBP5;IPO5	0.227502	0.867465
Glutathione S-transferase omega-1	V9HWG9;B2R983;P78417;Q5TA02	HEL-S-21;GSTO1	0.160012	0.867465
Vacuolar protein-sorting-associated protein 25	K7EKV4;A0A024R1X3;Q9BRG1	VPS25	-0.284445	0.867465
Histidine triad nucleotide-binding protein 2, mitochondrial	Q8WYJ5;Q9BX68;Q53HJ8	HINT2	0.158502	0.867465
Alpha-soluble NSF attachment protein	M0R0Y2;A0A024R0R9;P54920;M0R2M1	NAPA	-0.131728	0.867465
Growth factor receptor-bound protein 2	Q6ICN0;B0LPF3;P62993;B3KR50;J3KT38	GRB2	0.142591	0.867465
Trifunctional enzyme subunit beta, mitochondrial;3-ketoacyl-CoA thiolase	P55084;B4DY96;F5GZQ3;B4DDC9;B5MD38;D6W539	HADHB	-0.134639	0.867465
Transcription elongation factor B polypeptide 2	Q15370;B8ZZU8;I3L0M9;A0A0B4J296	TCEB2	-0.143987	0.867465
Creatine kinase M-type;Creatine kinase M-type, N-terminally processed	P06732;B2R892;B4DUP1	CKM	0.145281	0.867465
Mth938 domain-containing protein	Q9H7C9;E9PNP3;E9PR47;E9PIQ4	AAMDC	0.318745	0.867465
Cyclin-dependent kinase 9	B5BU53;B2R9L6;A0A024R880;P50750	CDK9	-0.129165	0.867465
Ras-related C3 botulinum toxin substrate 1;Ras-related C3 botulinum toxin substrate 3;Ras-related C3 botulinum toxin substrate 2	A4D2P1;A4D2P0;P63000;A4D2P2;A0A024R9T5;A0A024R1P2;P60763;P15153	RAC1;hCG_20693;RAC2;RAC3	0.135251	0.867465
39S ribosomal protein L49, mitochondrial	A0A024R578;Q13405;H0YDP7;Q59GE9	MRPL49	0.190725	0.867465
Glutaryl-CoA dehydrogenase, mitochondrial	A0A024R7F9;Q92947;B4DK85;B4DUY0	GCDH	0.187769	0.867465
Four and a half LIM domains protein 1	Q53FI7;B7Z6U8;B7Z5V0;B7Z9A1;B7Z4B7;Q5JXI8;B7Z5T3;Q13642;Q5JXH8;Q5JXH7;Q5JXI3;A0A0D9SFZ9;Q5JXI2;A0A0D9SFI6;A0A0D9SFB0;Q5JXH9;B3KRI9	FHL1	-0.187284	0.867465
Eukaryotic translation initiation factor 6	P56537	EIF6	0.338435	0.867465
E3 SUMO-protein ligase RanBP2	P49792	RANBP2	0.312525	0.867465
Importin subunit beta-1	B2RBR9;Q14974;J3KTM9;B7Z752	KPNB1	0.11169	0.867465
Puromycin-sensitive aminopeptidase	E9PLK3;P55786;B7Z899;B7Z4B2;B3KU93;B7Z1H4;B3KTP2;B7Z1V9	NPEPPS	0.105401	0.867465
Dynamin-2	P50570	DNM2	0.256665	0.867465
Cancer-related nucleoside-triphosphatase	Q5TDE9;Q9BSD7;Q5TDF0	C1orf57;NTPCR	-0.200108	0.867465
Fragile X mental retardation syndrome-related protein 1	A0A0F7KYT8;A0A0F7L1S3;P51114;A0A0F7L0Q8;B4DXZ6;E9PFF5;B4DM21;B4DM78;E7EU85;B4DGH9	FXR1	-0.172455	0.867465
Beta-adducin	Q05DK5;P35612	ADD2	-0.122086	0.867465
NA	Q49A71;Q8NI45	COQ7	0.311743	0.867465
Histone deacetylase;Histone deacetylase 2	B3KUJ5;Q92769	HDAC2	0.269616	0.867465
PDZ and LIM domain protein 5	A0A024RDE8;Q96HC4;H0Y8Y3;Q4W5K9	PDLIM5;LIM	-0.173937	0.867465
GTP-binding protein SAR1b	Q53F37;Q9Y6B6;D6RD69;Q9H029;D6RDB2	SAR1B;DKFZp434B2017	-0.212904	0.867465
Tight junction protein ZO-1	G3V1L9;Q07157;A9CQZ8;G5E9E7;A0A087X0K9;Q6MZU1;Q68DX9	TJP1;DKFZp686A1195;DKFZp686M05161	0.145996	0.867465
NADH dehydrogenase [ubiquinone] iron-sulfur protein 5	Q6IBA0;O43920	NDUFS5	0.134858	0.867465
Kinase D-interacting substrate of 220 kDa	Q9ULH0;E9PH70;H0Y8E4;B4DGY1;B4DK94;Q7Z322	KIDINS220;DKFZp686H14204	0.294634	0.867465
Acetyl-coenzyme A synthetase;Acetyl-coenzyme A synthetase, cytoplasmic	Q96FY7;Q4G0E8;Q68CU9;H0UIA1;Q6DKJ3;Q9NR19;B3KUV2;Q9H9U4	ACSS2;DKFZp762G026	0.214798	0.867465
Coxsackievirus and adenovirus receptor	P78310	CXADR	0.399601	0.867465
Myosin light polypeptide 6	F8W1R7;G3V1V0;P60660;J3KND3;G8JLA2;B7Z6Z4;G3V1Y7;F8VPF3;Q6IBG5;F8VZU9;F8W180	MYL6	0.18853	0.867465
Polyadenylate-binding protein;Polyadenylate-binding protein 1;Polyadenylate-binding protein 3	A0A024R9C1;P11940;A0A087WTT1;E7EQV3;B4DZW4;E7ERJ7;B4DQX0;B3KT93;A0A024R9E2;H0YAR2;Q5VX58;Q3ZCS4;Q9H361	PABPC1;PABPC3	0.13343	0.867465
Myopalladin	Q86TC9;A0A087WX60	MYPN	-0.182781	0.867465
Nucleolar protein 58	Q9Y2X3;B3KN82	NOP58	-0.239495	0.868519
Keratin, type I cytoskeletal 14	CON__P02533;P02533;A0A024R1X6	KRT14	0.559815	0.868519
Translocation protein SEC63 homolog	B3KNE7;B3KQF0;A0A0S2Z5M1;Q9UGP8;B3KWU4	SEC63	0.188799	0.868519
Peroxisomal multifunctional enzyme type 2;(3R)-hydroxyacyl-CoA dehydrogenase;Enoyl-CoA hydratase 2	B2R659;A0A0S2Z4J1;P51659;E7EWE5;B4DSD0;B4DDM5;E7ER27;G5E9S2;E7ET17;B4DI68;B3KSP2	HSD17B4	0.0938747	0.868519
PDZ domain-containing protein GIPC1	A8K2I7;A0A024R7I0;O14908;K7EM11;A0A024R7I1	GIPC1	0.147789	0.868519
Protein S100-A1;Protein S100	A0A0S2Z4H2;P23297;Q5T7Y5;Q5T7Y4;Q5T7Y6	S100A1	0.861349	0.868519
Lamin-B receptor	A0A024R3R5;Q14739;C9JXK0	LBR	0.137391	0.868519
Eukaryotic translation initiation factor 3 subunit F	B4DMT5;B3KSH1;O00303;B4DEW9	EIF3F	0.184565	0.868519
Translationally-controlled tumor protein	A0A0P1J1R0;Q5W0H4;A0A0B4J2C3;P13693;J3KPG2;E9PJF7;Q9UP43;B4DKJ4;B4DLD6	TPT1	0.373538	0.868519
Isovaleryl-CoA dehydrogenase, mitochondrial	A0A0S2Z422;A0A0A0MT83;P26440;A0A0S2Z4K7;H0YLC3;H7C4G6	IVD	0.0977418	0.868519
Major vault protein	X5D2M8;Q14764;X5D7K9;B4DXN0;B4DDR2;B4DP93;X5DNU0;X5D7S8	MVP	0.165713	0.868519
Spermatogenesis-associated protein 20	A0A0K0K1J9;Q8TB22;A0A0U1RRL8;B3KS41;A8K6Z0;Q9H6R1;B3KWT9	SPATA20	-0.309469	0.868519
Myosin-9	A0A024R1N1;P35579;Q86XU5	MYH9	0.109657	0.868519
Heme-binding protein 1	A0A024RAS8;Q9NRV9;F5GWX2	HEBP1	0.18856	0.868519
Myotrophin	Q69YG1;P58546;C9JL85	DKFZp761E1322;MTPN	-0.348862	0.868519
Voltage-dependent calcium channel subunit alpha-2/delta-2;Voltage-dependent calcium channel subunit alpha-2-2;Voltage-dependent calcium channel subunit delta-2	C9JE82;C9JVC9;Q9NY47	CACNA2D2	0.235659	0.868519
Ragulator complex protein LAMTOR2	Q9Y2Q5	LAMTOR2	-0.278892	0.868519
Haloacid dehalogenase-like hydrolase domain-containing protein 3	B3KUF6;A0A024R837;Q9BSH5	HDHD3	-0.236383	0.868519
Secernin-1	A0A090N7T9;Q12765;A0A024RA21;B4DH22;C9K052	SCRN1	-0.121071	0.868519
Solute carrier family 2, facilitated glucose transporter member 3	B7Z966;P11169;Q59F54;B7Z5A7	SLC2A3	0.113605	0.868519
Spermine synthase	P52788;H7C2R7;B4DE40	SMS	0.326947	0.868519
Potassium/sodium hyperpolarization-activated cyclic nucleotide-gated channel 4	Q9Y3Q4	HCN4	0.183007	0.868519
Regulator of microtubule dynamics protein 1	Q96DB5;H0YB03;H0YB83;E5RH53	RMDN1	0.243805	0.868519
Ubiquitin carboxyl-terminal hydrolase 47	Q96K76	USP47	0.158057	0.868519
Troponin C, slow skeletal and cardiac muscles	Q6FH91;P63316	TNNC1	0.176098	0.868519
Metaxin-1	A0A0A0MRK6;Q13505	MTX1	0.276595	0.868519
Alpha-N-acetylgalactosaminidase	A0A024R1Q5;P17050	NAGA	-0.308441	0.868519
Methylmalonate-semialdehyde dehydrogenase [acylating], mitochondrial	A0A024R6G4;Q02252;Q53H94;Q53FN8;G3V4Z4	ALDH6A1	-0.0878671	0.868519
Obscurin-like protein 1	O75147;A6NN50	OBSL1	0.167208	0.868519
Protein ERGIC-53	B2R774;A0A024R2A7;P49257;Q53FS4	LMAN1	-0.229519	0.868519
NA	B4DSQ5	NA	0.151159	0.868519
Extended synaptotagmin-2	H7BXI1;A0A087WXU3;A0FGR8	ESYT2	0.233551	0.868519
Threonine--tRNA ligase, mitochondrial	Q9BW92;U3KQG0;Q6ST48;F6S7Q7	TARS2	0.2084	0.868519
Chloride channel CLIC-like protein 1	A0A024R0G0;Q96S66;A0A024R095	CLCC1	0.31571	0.868519
Prosaposin;Saposin-A;Saposin-B-Val;Saposin-B;Saposin-C;Saposin-D	Q53FJ5;A0A024QZQ2;C9JIZ6;Q59EN5;P07602;B4DEK5;B4DRB7;Q5BJH1	PSAP	-0.153466	0.868519
Nucleobindin-1	Q53GX6;A8K7Q1;Q02818;B4DZX0;C9JKZ2;H7BZI1	NUCB1	0.254454	0.868519
NADH dehydrogenase [ubiquinone] 1 beta subcomplex subunit 11, mitochondrial	Q7Z4X2;Q9NX14	NDUFB11	-0.213512	0.868519
NA	B3KW79	NA	0.320366	0.868519
Nucleolar transcription factor 1	E9PKP7;P17480;B4DNQ1;A8K962;O00164;Q05BZ1;B4DLB0	UBTF	-0.322955	0.868519
O-acetyl-ADP-ribose deacetylase MACROD1	Q9BQ69	MACROD1	0.230214	0.868519
Filamin-B	A0A024R321;O75369;Q68CT4;E7EN95	FLNB;DKFZp686A1668	0.25011	0.868519
Galectin;Galectin-3	Q86TY5;A0A024R693;Q59FR8;P17931;Q6FGL0;G3V3R6	hCG_22119;LGALS3	-0.13935	0.870298
Heterogeneous nuclear ribonucleoprotein F;Heterogeneous nuclear ribonucleoprotein F, N-terminally processed	A0A024R7T3;P52597;B4DKS8	HNRPF;HNRNPF	0.119849	0.870298
Glucosamine-6-phosphate isomerase 1;Glucosamine-6-phosphate isomerase	P46926;B3KMV2;A8K3S1;D6RFF8;D6R9P4;D6RAY7	GNPDA1	0.244606	0.870298
Profilin	D3DNI2;C9J0J7;G5E9Q6;B4DNH1;D3DNI3	PFN2	0.25556	0.870298
Signal recognition particle subunit SRP72	Q86X80;A0PJJ5;Q0D2M6;V9HWK0;O76094;R4GNC1	SRP72;HEL103	0.184783	0.870298
Leucyl-cystinyl aminopeptidase;Leucyl-cystinyl aminopeptidase, pregnancy serum form	B2RAK1;Q9UIQ6	LNPEP	0.203694	0.870298
tRNA (cytosine(34)-C(5))-methyltransferase	Q08J23	NSUN2	-0.24171	0.870298
DnaJ homolog subfamily A member 3, mitochondrial	Q59E88;Q53G26;Q96EY1;B3KM81	DNAJA3	0.0984192	0.870298
N(G),N(G)-dimethylarginine dimethylaminohydrolase 2	V9HW53;O95865;A0A140T971;Q5SSV3;Q5SRR8;H0Y7N1	HEL-S-277;DDAH2	0.119166	0.870298
Clathrin heavy chain;Clathrin heavy chain 1	A0A087WVQ6;Q00610	CLTC	0.08185	0.870303
Nucleoporin p54	Q53FD7;Q53H29;Q7Z3B4;B4DRV5	NUP54	0.205249	0.870303
S-adenosylmethionine synthase;S-adenosylmethionine synthase isoform type-2	B4DEX8;A0A140VJP5;P31153	MAT2A	0.13293	0.870303
Serine protease HTRA2, mitochondrial	O43464;A0A0C4DG44;A8K7G2	HTRA2	-0.232114	0.870303
A-kinase anchor protein 12	Q02952	AKAP12	-0.275923	0.870701
NA	K7EL81;B4DLW4	PPP1R12C	0.187314	0.870701
40S ribosomal protein S27;40S ribosomal protein S27-like	H0YMV8;Q71UM5;C9JLI6	RPS27L	0.135842	0.870701
Protein S100-A13	Q99584	S100A13	0.274635	0.870701
Pre-mRNA-processing-splicing factor 8	Q6P2Q9;B4DK16	PRPF8	0.187106	0.870701
40S ribosomal protein S11	P62280;M0QZC5	RPS11	0.120727	0.870701
Hexokinase	B3KXY9	NA	-0.0849573	0.870701
60S ribosomal protein L8	P62917;B4DVG7;E9PKZ0;G3V1A1;E9PKU4	RPL8	0.0921894	0.870701
U4/U6 small nuclear ribonucleoprotein Prp4	Q6IAP9;Q5T1M7;Q59EL4;O43172;B2R7V4	PRPF4	0.194789	0.870701
Guanine nucleotide-binding protein G(I)/G(S)/G(O) subunit gamma-7	O60262	GNG7	0.141355	0.870701
Ubiquitin carboxyl-terminal hydrolase 5	A0A140VJZ1;P45974	USP5	0.115459	0.870701
Glycogen [starch] synthase, muscle	P13807;Q53ER0;A8K6K7;B7Z806;B7Z6I6	GYS1	0.100399	0.870701
Nuclear autoantigenic sperm protein	P49321;Q53H03;B4DS57;Q6PJY7	NASP	-0.218184	0.870701
NA	CON__P00761	NA	0.482851	0.870701
Ras-related protein Ral-B	A0A024RAG3;P11234;C9J6B1;C9JQB3;B4E364	RALB	0.152255	0.870701
Sorcin	C9J0K6;P30626;B4DHQ6	SRI	-0.128656	0.870701
40S ribosomal protein S28	B2R4R9;P62857	RPS28	-0.1058	0.870701
Methionine aminopeptidase 1	P53582;Q5CZ91	METAP1;DKFZp781C0419	0.163891	0.870701
60S ribosomal protein L23	Q9BTQ7;A0A024R1Q8;P62829;C9JD32;J3KT29;J3KTJ3;B9ZVP7	RPL23	-0.114156	0.870701
ATP synthase subunit O, mitochondrial	P48047;Q53HH2;H7C0C1	ATP5O	0.102321	0.870701
3-hydroxyisobutyrate dehydrogenase;3-hydroxyisobutyrate dehydrogenase, mitochondrial	A0A024RA75;P31937	HIBADH	0.124152	0.870701
NA	F8W7C6;H7C123;H7C2C5	RPL10	0.120389	0.870701
Very-long-chain enoyl-CoA reductase	Q9NZ01;B3KM97;B3KSQ1	TECR	0.299696	0.870701
Procollagen galactosyltransferase 1	Q8NBJ5	COLGALT1	0.217264	0.870701
Prenylcysteine oxidase 1	Q9UHG3;B7Z8A2;Q584P1;B7Z3Y2;F8W8W4	PCYOX1	-0.128643	0.871162
NADH dehydrogenase [ubiquinone] 1 alpha subcomplex subunit 9, mitochondrial	Q9BTT5;Q16795;A8K4V2	NDUFA9	0.0934845	0.871361
Coronin;Coronin-7	A0A0A6YYL4;P57737;B3KUH7;B3KSY4;B4DKU9	CORO7-PAM16;CORO7;hCG_1787779	0.0983635	0.871361
Vacuolar protein sorting-associated protein VTA1 homolog	A0A087WY55;Q9NP79;Q9C063;Q5TGM0	VTA1	0.202377	0.872077
U1 small nuclear ribonucleoprotein 70 kDa	A0A024QZD5;P08621;A8KAQ5;M0QYR1	SNRP70;SNRNP70	0.349986	0.873171
Ras-related protein Rap-2c	Q9Y3L5	RAP2C	0.190069	0.873171
Mesencephalic astrocyte-derived neurotrophic factor	A8K878;P55145	MANF	-0.327027	0.873171
Prolyl 4-hydroxylase subunit alpha-2	Q05DA4;O15460;Q5HYD8	P4HA2;DKFZp686M0919	-0.189402	0.873171
Biliverdin reductase A	A0A140VJF4;P53004	BLVRA	0.172383	0.874505
Small glutamine-rich tetratricopeptide repeat-containing protein alpha	O43765;B4DEA6;K7EMD6	SGTA	-0.170404	0.875488
NADH dehydrogenase [ubiquinone] iron-sulfur protein 7, mitochondrial	F5H5N1;B7Z1U1;A8K0V6;Q8NAS7;Q7LD69;F5GXJ1;O75251;B7Z4P1;Q6ZQU6;A0A087WTI3	NDUFS7	0.160666	0.875488
Beta-galactosidase	Q53G40;B7Z6Q5;P16278;E7EQ29;B7Z5H9;Q53H18	GLB1	0.547961	0.876113
RNA-binding motif protein, X chromosome;RNA-binding motif protein, X chromosome, N-terminally processed	P38159;H3BT71;H0Y6E7;B4E352;B3KRG5;H3BUY5	RBMX	-0.12543	0.876175
Pleckstrin homology domain-containing family A member 5	A0A024RAY7;Q9HAU0;B4DHK5;A0JP02;B4DMB9;B4DJX4	PLEKHA5	-0.272556	0.876416
NA	H7BXR3;H7C1R7	SORBS2	-0.159876	0.876416
NADH dehydrogenase [ubiquinone] 1 alpha subcomplex assembly factor 3	Q9BU61	NDUFAF3	0.141335	0.876416
Synemin	O15061;A0A075B7B1;H0YL34	SYNM	0.124715	0.876416
Arginase;Arginase-2, mitochondrial	A0A024R6A0;P78540	ARG2	0.277281	0.876416
Glycerol-3-phosphate dehydrogenase 1-like protein;Glycerol-3-phosphate dehydrogenase [NAD(+)]	Q8N335;C9JM46	GPD1L	0.227735	0.87684
Heat shock cognate 71 kDa protein	V9HW22;P11142;E9PKE3;Q53GZ6;Q96IS6;B3KTV0;E9PNE6;Q53HF2;A8K7Q2	HEL-S-72p;HSPA8	-0.128205	0.876978
NA	B7Z964;H7C3M8	SLMAP	0.102379	0.876978
Sphingosine-1-phosphate lyase 1	O95470	SGPL1	0.184505	0.876978
SWI/SNF-related matrix-associated actin-dependent regulator of chromatin subfamily B member 1	Q9H836;G5E975;Q12824;B5MCL5;C9JTA6;A0A0G2JSE9;Q86WI8;A0A0U1RQQ2;Q86WI7;A0A0U1RRB8;B4E117;B4DRT1	SMARCB1	0.111734	0.876978
NAD-dependent protein deacylase sirtuin-5, mitochondrial	A0A024R012;Q9NXA8	SIRT5	0.158086	0.876978
Profilin-1	P07737;K7EJ44	PFN1	0.0877142	0.876978
Enolase	B4DUJ6	NA	0.327228	0.876978
Protein arginine N-methyltransferase 5;Protein arginine N-methyltransferase 5, N-terminally processed;Protein arginine N-methyltransferase 5	O14744;B2RDD7;G3V580;B4DV00	PRMT5	0.242293	0.876978
Transmembrane protein 256	K7ENI6;K7ERE1;Q8N2U0	TMEM256	0.120942	0.876978
GPI transamidase component PIG-S	Q8NBL9;B2RBB2;Q96S52;Q96IR5	PIGS	0.285146	0.876978
Cytochrome c oxidase subunit 5A, mitochondrial	P20674;H3BRM5;H3BV69;H3BNX8	COX5A	-0.164457	0.876978
Ig gamma-2 chain C region	Q6N093;P01859;Q6MZU6;Q68CN4	DKFZp686I04196;IGHG2;DKFZp686C15213;DKFZp686E23209	0.669594	0.876978
Probable ATP-dependent RNA helicase DDX5	B4DN41;J3KTA4;P17844;B5BUE6;B4DNG2;Q7Z2V5;Q59E92	DDX5;DKFZp686J01190	0.122815	0.876978
Platelet glycoprotein 4	E7EU05;D9IX65;D9IX64;D9IX63;B3KUB8;A4D1B1;P16671;E9PLT1;B7Z6C3	CD36	0.617073	0.876978
Carbamoyl-phosphate synthase [ammonia], mitochondrial	Q5R210;Q5R208;Q5R206;A8K134;A0A024R454;P31327;Q5R209;Q5R207	CPS1	0.185889	0.876978
Glycogenin-1	B2R5R5;P46976;G5E9W8;B4DSX6;C9JQ42;Q8N5Y3	GYG1	-0.102591	0.876978
Aminoacyl tRNA synthase complex-interacting multifunctional protein 2	B2R7M3;A0A024QZY1;Q13155;A8MU58;F8W950	JTV1;AIMP2	0.159106	0.876978
Electron transfer flavoprotein subunit alpha, mitochondrial	A0A0S2Z3L0;P13804;A0A0S2Z3M4;H0YLU7;H0YKF0;H0YL12;H0YK49;H0YNX6	ETFA	-0.122966	0.876978
Chromobox protein homolog 1	J3KS05;Q6IBN6;P83916;B5MD17;K7ELA4	CBX1	0.21549	0.876978
Mitochondrial import receptor subunit TOM70	O94826;B4DZ87;B3KQK5;B3KQK0	TOMM70A	0.177362	0.877397
Desmoplakin	P15924;Q4LE79	DSP;DSP variant protein	-0.085997	0.87773
Multifunctional protein ADE2;Phosphoribosylaminoimidazole-succinocarboxamide synthase;Phosphoribosylaminoimidazole carboxylase	E9PBS1;A0A024RD93;P22234;B4DGX3;D6RF62	PAICS	0.131634	0.87773
Prostaglandin reductase 1	Q14914;A0A024R172	PTGR1;LTB4DH	-0.124446	0.87773
Heat shock 70 kDa protein 4	P34932;B4DH02;V9HW33;Q59GF8;B4DUS3;B4DIZ3;B4DT47;B4E354;B4E0H6	HSPA4;HEL-S-5a	0.120838	0.87773
Tetraspanin;CD81 antigen	E9PJK1;E9PRJ8;H0YDL9;H0YDJ9;A0A024RCB7;E9PIF1;A6NMH8;P60033	CD81	-0.170705	0.87773
Heme-binding protein 2	Q05DB4;Q9Y5Z4	HEBP2	0.268925	0.87773
DNA-directed RNA polymerases I, II, and III subunit RPABC1	B4DJ89;A0A087WWX0;A0A087WVZ9;A0A0A0MQR7;E5KT65;P19388;A0A087WVN5	POLR2E	0.182766	0.87773
Eukaryotic initiation factor 4A-II;Eukaryotic initiation factor 4A-II, N-terminally processed	Q14240;E7EQG2;Q9NZE6;Q96B07	EIF4A2	-0.127553	0.87773
Heat shock protein beta-1	V9HW43;P04792;B4DL87	HEL-S-102;HSPB1	-0.0857905	0.87773
Periostin	A0A024RDS2;Q15063;A0A024RDT5	POSTN	0.278343	0.87773
F-box-like/WD repeat-containing protein TBL1XR1	Q9BZK7;B7Z475;A0A0D9SF63	TBL1XR1	0.483721	0.87773
Ankyrin-3	Q12955;Q59G01	ANK3	-0.14022	0.87773
Sarcoplasmic reticulum histidine-rich calcium-binding protein	M0QZ43;Q2M1I0;B5TMG5;P23327	HRC	0.18882	0.87773
Malic enzyme;NADP-dependent malic enzyme, mitochondrial	E9PMB9;B2R995;Q16798	ME3	-0.113635	0.87773
Glutathione peroxidase 7	Q96SL4	GPX7	0.165684	0.87773
THO complex subunit 4	Q86V81;E9PB61	ALYREF	-0.102336	0.87773
NA	Q8N7A6	NA	0.354992	0.87773
Suppressor of G2 allele of SKP1 homolog	A8K5T7;Q9Y2Z0;A8K7W3;B4DYC6	SUGT1	0.161224	0.87773
DNA mismatch repair protein Msh2	P43246;V9H019;Q53GS1;Q53FK0;E9PHA6;Q53RU4;B4DL39;B4DSB9;V9H068;V9H0D5;V9H023	MSH2	0.212417	0.87773
Keratin, type I cytoskeletal 18	B2RA03;A0A024RAY2;P05783;F8VZY9;I6L965	KRT18	0.103667	0.87773
Heterogeneous nuclear ribonucleoprotein U-like protein 1	A8K6U7;Q9BUJ2;A8K3W4;A0A024R0J9;A0A0A0MRA5;B7Z4B8;A8K5K0;M0R3F1;M0QYZ0	HNRNPUL1;HNRPUL1	0.188028	0.87773
Isocitrate dehydrogenase [NADP], mitochondrial;Isocitrate dehydrogenase [NADP]	Q53GL5;P48735;Q13584;B4DSZ6	IDH2	-0.0685679	0.87773
Ras-related protein Rab-10	P61026;Q53T70	RAB10	-0.285534	0.87773
Protein prune homolog	Q86TP1;Q5SZG1	PRUNE	0.227934	0.87773
Proteasome subunit alpha type;Proteasome subunit alpha type-2	Q53GF5;A0A024RA52;P25787;C9JCK5	PSMA2	-0.169599	0.87773
Keratin, type I cytoskeletal 9	CON__P35527;P35527;K7EQQ3	KRT9	0.228722	0.878053
Choline-phosphate cytidylyltransferase A;Choline-phosphate cytidylyltransferase B	C9J050;C9JEJ2;P49585;D3DXB2;B4E322;H7C1T3;B2R8P1;H7BZN1;C9J2E1;Q9Y5K3	PCYT1A;hCG_2002711;PCYT1B	-0.100408	0.878053
Histone H2A.V;Histone H2A.Z;Histone H2A	Q71UI9;P0C0S5;C9J0D1;C9J386	H2AFV;H2AFZ	-0.09825	0.878818
Transformer-2 protein homolog beta	Q8N1H4;Q68DZ9;Q59GA1;B2RDQ3;P62995;H7BXF3	DKFZp686F18120;TRA2B	0.164957	0.879181
Drebrin-like protein	Q9UJU6;B4DDD6;Q59FH4;H0Y5J4;B4DDU5;B4DKZ4;B4DXL9;B4DUF9	DBNL	0.178518	0.879181
Alpha-1,4 glucan phosphorylase;Glycogen phosphorylase, liver form	B2R825;P06737;E9PK47	PYGL	0.108593	0.879181
Elongation factor 1-delta	E9PK01;P29692;A0A087X1X7;Q71RH4;Q9H7G6;D3DWK1;B2RAR6;E9PRY8;E9PPR1;E9PL12;E9PQ49;E9PI39;E9PMW7;E9PIZ1;H0YCK7;E9PQZ1	EEF1D	0.0929915	0.879181
Lipoma-preferred partner	B7ZLW0;Q93052;A0A087WZF1;B7Z8W0;C9JUT4	LPP	0.128735	0.879181
Nucleophosmin	A0A0S2Z4G7;A0A0S2Z491;P06748;A0A140VJQ2;A4ZU86;Q9BTI9	NPM1	-0.0965479	0.879181
Proline synthase co-transcribed bacterial homolog protein	D3DSW3;O94903;A8K520;E5RG77;B3KMP6;E5RFX7	PROSC	0.210645	0.879181
4-aminobutyrate aminotransferase, mitochondrial	X5D8S1;H3BRN4;P80404;H3BNQ7;B7Z1V4	ABAT	0.174993	0.879181
Superoxide dismutase [Cu-Zn]	V9HWC9;P00441;H7BYH4	HEL-S-44;SOD1	-0.242191	0.879181
Splicing factor U2AF 35 kDa subunit	P0DN76;B5BU08;Q01081	U2AF1	-0.178594	0.879181
Transcription elongation regulator 1	O14776;G3V220	TCERG1	0.149653	0.879181
39S ribosomal protein L50, mitochondrial	Q8N5N7	MRPL50	0.139638	0.879181
Nascent polypeptide-associated complex subunit alpha, muscle-specific form	E9PAV3	NACA	0.111588	0.879393
NSFL1 cofactor p47	Q9UNZ2;Q53FE8;Q53FF5;F2Z2K0	NSFL1C	0.11479	0.880946
Flap endonuclease 1	Q6FHX6;P39748;B4DWZ4;I3L3E9	FEN1	0.221762	0.881419
Transmembrane protein 109	B2R9T9;Q9BVC6;B4E1S3	TMEM109	0.143231	0.882669
RNA binding protein fox-1 homolog;RNA binding protein fox-1 homolog 2;RNA binding protein fox-1 homolog 1;RNA binding protein fox-1 homolog 3	B0QYV1;A0A0G2JRA5;O43251;S4R469;Q8TCM0;F8VR27;F8VZY7;Q59HD3;X5DP44;B7ZLH9;B0QYY4;A0A087X2B1;F8WSN4;X5D7T5;J3KNW3;X5DNY3;B7Z1U7;F8VZG9;Q9NWB1;I3L1D4;A0A0G2JRD1;S4R3K7;A0A0G2JSB3;B0QYY7;J3QRF4;F8VRS4;A6NFN3	RBFOX2;DKFZp547L059;RBFOX1;A2BP1;RBFOX3	-0.201486	0.882704
39S ribosomal protein L13, mitochondrial	E5RJI7;Q9BYD1	MRPL13	-0.153098	0.882704
Proteasome subunit alpha type-7;Proteasome subunit alpha type	A0A0K0K1K4;O14818;Q05DH1;H0UI83;H0Y586	PSMA7;hCG_41772	-0.125047	0.882772
Arfaptin-1	B4E273;P53367;B7ZA10;Q8N8M9	ARFIP1	0.152046	0.882772
Procollagen-lysine,2-oxoglutarate 5-dioxygenase 1	A0A024R4H0;Q02809;B2R5M9;B4DGN8;B4DHT1	PLOD1	0.185654	0.882772
Stress-70 protein, mitochondrial	B7Z4V2;V9HW84;P38646;Q8N1C8;B7Z4T3;B7Z1V7	HEL-S-124m;HSPA9	-0.0867436	0.882772
Signal recognition particle 14 kDa protein	P37108;H0YLA2	SRP14	-0.146086	0.882772
Serine/arginine-rich splicing factor 3	B2R6F3;P84103;A0A087X2D0	SFRS3;SRSF3	-0.0920241	0.88381
Copine-5	Q9HCH3	CPNE5	0.133915	0.884044
Ras-related protein Rab-35	Q15286;F5H157	RAB35	-0.195166	0.885374
Tumor susceptibility gene 101 protein	F5H442;Q99816;D3DQY6	TSG101	-0.282446	0.887121
Tubulin alpha-8 chain	C9J2C0;Q9NY65;Q7Z3M3	TUBA8;DKFZp686L04275	0.52456	0.887121
Cytoplasmic FMR1-interacting protein 2	E7EVJ5;B7Z4I3;B7Z8N7;Q96F07;H7C229;E7EW33;B7Z217;B7Z3H2;Q9NSN1	CYFIP2;DKFZp761H087	0.219789	0.887679
Midkine	E9PPJ5;E9PLM6;P21741	MDK	0.0918187	0.887679
Glucose-6-phosphate isomerase	B4DE36;P06744;A0A0A0MTS2;K7EQ48;A0A0J9YXP8;A0A0J9YX90;A0A0J9YYH3	GPI	-0.120709	0.889513
Ragulator complex protein LAMTOR1	F5GX19;F5H3Y3;Q6IAA8;H0YFI1;F5H479	LAMTOR1	0.149265	0.889513
Glycogen phosphorylase, muscle form;Alpha-1,4 glucan phosphorylase	A0A0M4FEM1;P11217;B4DRW6;B2RB32;B4DRQ4	PYGM	-0.106509	0.889513
U2 snRNP-associated SURP motif-containing protein	O15042;E7ET15	U2SURP	0.153196	0.889513
Rootletin	B1AKD8;Q5TZA2;A1L0S9;A1L0S8;A0A087WW81	CROCC	-0.135677	0.889513
28S ribosomal protein S7, mitochondrial	A0A024R8L0;J3QLS3;Q9Y2R9;J3QQS1;J3QKW2;J3KSI8	MRPS7	0.153562	0.889513
Protein S100-A4	P26447	S100A4	-0.347385	0.889513
Complement component 1 Q subcomponent-binding protein, mitochondrial	Q07021;A8K651;I3L3Q7;I3L3B0	C1QBP	0.075196	0.889513
NA	NA	NA	-0.122143	0.889513
Farnesyl pyrophosphate synthase	P14324;B3KMW3;A0A087X1D8;A0A087WVN4;Q14329	FDPS	-0.141525	0.889513
Protein phosphatase 1 regulatory subunit 12B;Protein phosphatase 1 regulatory subunit	A0A0A0MS24;O60237;A0A024R998;A0A024R9B2	PPP1R12B	-0.182599	0.889513
Actin-like protein 6A	Q6FI97;Q53FS0;O96019;H7C5S0	BAF53A;ACTL6A	0.14481	0.889513
40S ribosomal protein S19	B0ZBD0;Q8WVX7;P39019;A0A075B6E2	RPS19	0.104895	0.889513
Microtubule-associated tumor suppressor 1	B4E246;Q9ULD2	MTUS1	-0.279229	0.889513
Calcium-binding mitochondrial carrier protein Aralar1	B3KMV8;O75746	SLC25A12	-0.133872	0.889513
Low molecular weight phosphotyrosine protein phosphatase	Q59EH3;P24666;G5E9R5;A0A140VK37	ACP1	0.148041	0.889513
Protein NipSnap homolog 3B	Q9BS92;F2Z3L7	NIPSNAP3B	0.199806	0.889513
Tubulin-specific chaperone D	J3KR97;Q9BTW9;B4DE53;I6L959	TBCD	0.167582	0.889513
Heterogeneous nuclear ribonucleoproteins C1/C2;Heterogeneous nuclear ribonucleoprotein C-like 4;Heterogeneous nuclear ribonucleoprotein C-like 1;Heterogeneous nuclear ribonucleoprotein C-like 3;Heterogeneous nuclear ribonucleoprotein C-like 2	G3V4W0;B4DY08;B2R5W2;G3V4C1;B2R603;A8K9A4;P07910;G3V2Q1;G3V576;B3KX96;B4DQQ2;G3V2D6;G3V5V7;D3DPI2;G3V555;G3V575;A0A0G2JPF8;A0A0G2JNQ3;P0DMR1;O60812;B7ZW38;B2RXH8	HNRNPC;hCG_1641229;HNRNPCL4;HNRNPCL1;HNRNPCL3;HNRNPCL2	-0.116483	0.889513
T-complex protein 1 subunit eta	Q53HV2;Q99832;Q6IBT3;B7Z7I4;B7Z1C9	CCT7	0.0923144	0.889513
Epidermal growth factor receptor substrate 15-like 1	A0A024R7G6;M0R165;A8K5P4;Q9UBC2;A5PKY0;B4DME4;B4DQX5;M0R2S2	EPS15L1	0.244374	0.889513
U6 snRNA-associated Sm-like protein LSm4	V9GZ56;Q9Y4Z0;M0QXB0;U3KQS7;U3KQK1	LSM4	0.144394	0.889513
Protein PBDC1	Q9BVG4;Q9P0N4;A6NDF3	PBDC1	0.155932	0.889513
CDGSH iron-sulfur domain-containing protein 2	Q8N5K1;I3L1N9	CISD2	0.131491	0.889513
Septin-7	Q8TC62;E7ES33;Q3LIE9;A4GYY8;E7EPK1;Q16181;B4DUD6;A8K3D0;Q59EY4	SEPT7;Nbla02942;DKFZp686F17268	0.16441	0.889513
Amine oxidase [flavin-containing] B	Q8TBI1;P27338;B7Z242	MAOB	-0.119527	0.889513
F-actin-capping protein subunit alpha-2	Q53GE2;Q53GC7;A4D0V4;P47755;F8W9N7;A0A0D9SET8;C9JUG7;B4DE01	CAPZA2	-0.103357	0.889723
Syntaxin-binding protein 3	O00186	STXBP3	0.197863	0.889723
4-trimethylaminobutyraldehyde dehydrogenase	P49189;B4DE91;B9EKV4;B4DX14;B4DYY1	ALDH9A1	-0.0853305	0.889723
Sorting nexin-2	B3KN57;B3KML1;O60749;Q53GG3	SNX2	0.182219	0.889723
GMP synthase [glutamine-hydrolyzing]	B4DUT7;A0A140VJK6;P49915;Q53F90	GMPS	0.154592	0.889723
Splicing factor, proline- and glutamine-rich	Q86VG2;P23246;Q9BSV4;Q6PIX2	SFPQ	0.0978618	0.890197
Microtubule-associated protein RP/EB family member 1	B4DM33;Q15691;A2VCR0	MAPRE1	0.0856389	0.890197
Cytochrome c oxidase subunit 7A1, mitochondrial	Q6FGI7;P24310;K7ER11;H6SG12	COX7A1	-0.162876	0.890589
Cathepsin D;Cathepsin D light chain;Cathepsin D heavy chain	A0A1B0GW44;A0A1B0GVD5;A0A1B0GWE8;V9HWI3;P07339;A0A1B0GV23;A0A1B0GVP3;H7C469;H7C1V0	HEL-S-130P;CTSD	0.135814	0.890589
Myoferlin	Q9NZM1;H0YD14	MYOF	-0.136914	0.890589
Serpin H1	A0A024R5K8;P50454;B4DN87;A8K259;E9PR70;E9PK86;E9PMI5	SERPINH1	0.101459	0.890589
ATP synthase subunit gamma	B4DL14;B4DFE6	NA	0.0713891	0.890613
DNA helicase;DNA replication licensing factor MCM5	Q53FG5;B1AHB0;A8K521;P33992;B1AHB1;B4DQ39;B3KVF0;B4DVK5	MCM5	0.201444	0.892303
Protein-L-isoaspartate O-methyltransferase;Protein-L-isoaspartate(D-aspartate) O-methyltransferase	A0A0A0MRJ6;H7BY58;P22061;F6S8N6;B7Z972	PCMT1	0.0975344	0.892303
Fragile X mental retardation syndrome-related protein 2	P51116	FXR2	-0.175434	0.892303
ATP-dependent RNA helicase DDX3X	A0A0D9SFB3;A0A0D9SG12;B5BTY4;Q59GX6;A0A0D9SF53;O00571;Q5S4N1;B4DLU5	DDX3X	0.169319	0.892303
NA	B4DJ09	NA	0.147636	0.892303
Alpha-aminoadipic semialdehyde dehydrogenase	A0A1B0GTG2;A0A1B0GW77;P49419;A0A1B0GUA1;A0A1B0GW82;A0A1B0GTY9;A0A1B0GTJ4;A0A1B0GV49;A0A140T9V3;A0A0J9YWF7	ALDH7A1	0.123511	0.892803
NA	Q96DP0	NA	0.13919	0.893041
NADH dehydrogenase [ubiquinone] iron-sulfur protein 2, mitochondrial	O75306;B7Z792;Q53HG2;B7Z9L2	NDUFS2	0.0975466	0.893041
Serrate RNA effector molecule homolog	Q9BXP5;H7C3A1	SRRT	0.153429	0.893527
Inorganic pyrophosphatase 2, mitochondrial	Q9H2U2;B4DR66;D6R967	PPA2	-0.142895	0.89381
NA	D3DSM4;D3DSM5;Q8NG19;H7C457	COL18A1	-0.133288	0.894982
DNA repair protein RAD50	Q92878	RAD50	0.177167	0.8963
28S ribosomal protein S22, mitochondrial	G5E9W7;G5E9V5;P82650;Q8NBL6;A8K9Y7;H7C5F2;H7C5H3	MRPS22	0.142227	0.8963
COP9 signalosome complex subunit 4	Q53FV3;B3KM48;A0A0S2Z5H7;Q9BT78;D6RFN0;D6RAX7;D6RD63	COPS4	0.0991587	0.8963
Nicotinate-nucleotide pyrophosphorylase [carboxylating]	V9HWJ5;Q15274;C9JCJ5	HEL-S-90n;QPRT	-0.164409	0.8963
Interleukin enhancer-binding factor 2	B4DY09;F4ZW62;Q12905;Q53FG3;F4ZW63	ILF2	0.160029	0.896518
Ras-related protein Rab-24	Q969Q5;F8W8H5;Q8WY67	RAB24	0.27137	0.896624
Metastasis-associated protein MTA2	A0A024R534;O94776	MTA2	0.216826	0.897901
Core histone macro-H2A;Core histone macro-H2A.2;Histone H2A	A0A024QZP6;Q9P0M6;Q9HA11;Q5SQT3	H2AFY2	-0.0813409	0.897901
Phosphorylase b kinase regulatory subunit alpha, liver isoform	P46019	PHKA2	0.0875321	0.899193
Ras-related protein Rab-1A	Q5U0I6;P62820;E7END7;B7Z8M7	RAB1A	0.0807994	0.899193
26S proteasome non-ATPase regulatory subunit 12	A0A0S2Z489;O00232;A0A0S2Z476	PSMD12	-0.109371	0.899628
FYVE and coiled-coil domain-containing protein 1	Q9BQS8	FYCO1	0.147403	0.899628
Tubulin alpha-1B chain	B3KT06;B3KPS3;P68363;A8JZY9;B4DDU2;F8VVB9	TUBA1B	0.074205	0.899628
GTPase-activating protein and VPS9 domain-containing protein 1	A0A024R862;A0A024R8A2;Q14C86;F8W9S7;A0A024R875;B3KN67;C9IZ08;B4DK42	GAPVD1	-0.218077	0.899628
60S ribosomal protein L13	Q6NZ55;A8K4C8;P26373;J3QSB4	RPL13	-0.0754646	0.899628
Importin-9	Q96P70	IPO9	0.223359	0.899628
NADH dehydrogenase [ubiquinone] 1 beta subcomplex subunit 5, mitochondrial	E7EWP0;D3DNS1;B2R9L0;H0Y886;O43674;Q05D62	NDUFB5	-0.115451	0.899628
cAMP-dependent protein kinase type II-beta regulatory subunit	Q6DHZ2;A0A024R712;P31323;B3KY43;Q75MP1	PRKAR2B	-0.121215	0.899628
Lon protease homolog, mitochondrial;Lon protease homolog	K7EJE8;K7EKE6;B3KU28;Q2VPA0;B3KXS5;E5KMI6;P36776;B4DPX0	LONP1	0.0834436	0.899628
Echinoderm microtubule-associated protein-like 2	K7EIK7;O95834;A0A0C4DGQ7;C9JRL6;B7Z872;B7Z918	EML2	0.217174	0.899628
Non-specific serine/threonine protein kinase;Serine/threonine-protein kinase MRCK beta	A0A024R6N2;Q9Y5S2	CDC42BPB	-0.144901	0.899882
Ubiquilin-2	B4DZF1;Q9UHD9;B4DM19	UBQLN2	0.149667	0.900709
Threonine--tRNA ligase, cytoplasmic	Q53GX7;P26639;B2RDX5;B4DKZ9;Q5M7Z9;B3KTN2	TARS	-0.109196	0.904765
Rho-related GTP-binding protein RhoC	Q5JR08;A0A024R0I3;P08134;E9PQH6;Q5JR07;C9JNR4;C9JX21;Q5JR05	RHOC;hCG_2043376;RHOA	0.145146	0.905963
ATP-binding cassette sub-family B member 7, mitochondrial	A0A0S2Z2Z3;O75027;A0A087WW65;B4DGL8;B3KM98	ABCB7	0.338505	0.907956
Elongation factor Tu, mitochondrial	P49411	TUFM	0.0625462	0.907956
Histone H1.2	P16403	HIST1H1C	0.155788	0.908045
Ubiquitin carboxyl-terminal hydrolase 24	Q9UPU5	USP24	0.228903	0.908045
Vacuolar protein sorting-associated protein 29	Q5JPE4;F8VXU5;Q9UBQ0	DKFZp667O202;VPS29	-0.309395	0.908045
Vigilin	B2R5V9;A0A024R4E5;Q00341;H0Y394;B4DKR8;Q6ZS03;Q96CF6	HDLBP	0.138173	0.908045
Tryptophan--tRNA ligase, cytoplasmic;T1-TrpRS;T2-TrpRS	A0A024R6K8;P23381	WARS	0.144208	0.908045
F-actin-capping protein subunit beta	P47756;B2R7T8;B1AK87;B1AK88;B4DWA6;B1AK85	CAPZB	0.135488	0.908045
Chloride intracellular channel protein;Chloride intracellular channel protein 4	Q6FIC5;Q9Y696;B4DWC4;Q9NVF8	CLIC4	-0.147154	0.908045
Filamin-C	Q14315	FLNC	-0.0631779	0.908626
39S ribosomal protein L4, mitochondrial	K7ES61;A0A024R7C5;Q9BYD3;K7EKI4;K7ELF1;K7ELQ0	MRPL4	0.103413	0.910365
Branched-chain-amino-acid aminotransferase;Branched-chain-amino-acid aminotransferase, mitochondrial	Q53EW7;O15382;B3KSI3;M0QXF9;M0QZ10;M0QZP4	BCAT2	-0.141563	0.910365
Protein deglycase DJ-1	V9HWC2;Q99497;K7ELW0;K7EN27	HEL-S-67p;PARK7	-0.076088	0.910365
Far upstream element-binding protein 1	B4E0X8;E9PEB5;Q96AE4;B4DWL1;B4DT31;Q6PJY1;Q59FU3	FUBP1	0.0936453	0.910365
Heterogeneous nuclear ribonucleoprotein H2	P55795;B4DFK9;B4DP00	HNRNPH2	0.12531	0.910365
SRA stem-loop-interacting RNA-binding protein, mitochondrial	Q9GZT3;A0A087WUN7;H0YJ40;G3V4X6;G3V2S9;H0YJW7	SLIRP	-0.222455	0.910365
26S proteasome non-ATPase regulatory subunit 14	A0A140VKF2;O00487;Q53TH1;Q59G89	PSMD14	0.10114	0.910365
Protein kinase C and casein kinase substrate in neurons protein 2	Q6FIA3;A0A0U1RR22;Q9UNF0;A0A024R4X1;B0QYG7;B0QYG8	PACSIN2	0.109257	0.910365
Protein NDRG2	Q9UN36;G3V5H8;G3V4S9;Q8TDR6;A0A0A0MS87;G3V578;H0YJT9;G3V5L7;G3V2I9	NDRG2	0.151607	0.910365
Prostaglandin F2 receptor negative regulator	Q9P2B2	PTGFRN	0.116829	0.910365
L-xylulose reductase	J3KS22;Q7Z4W1;J3QS36;J3KRZ4;J3QS45;J3KSZ5	DCXR	0.0803845	0.911149
60S ribosomal protein L5	B3KTM6;A2RUM7;P46777;Q59GX9	RPL5	-0.115539	0.911278
Pyruvate dehydrogenase protein X component, mitochondrial	O00330;B2R673	PDHX	0.0794569	0.912968
Chromatin complexes subunit BAP18	F8W038;Q8IXM2;H0YIS7;F8W1H0	C17orf49;BAP18;RNASEK-C17orf49	-0.178994	0.913482
28S ribosomal protein S15, mitochondrial	P82914;D3DPS9;B4DYW3;Q59EA6	MRPS15	0.10768	0.913482
Epoxide hydrolase 1	R4SBI6;P07099;Q6FGZ3	EPHX1	0.0785888	0.913482
Charged multivesicular body protein 4b	Q9H444	CHMP4B	0.154982	0.913482
C-1-tetrahydrofolate synthase, cytoplasmic;Methylenetetrahydrofolate dehydrogenase;Methenyltetrahydrofolate cyclohydrolase;Formyltetrahydrofolate synthetase;C-1-tetrahydrofolate synthase, cytoplasmic, N-terminally processed	A0A024R652;P11586;F5H2F4;B7Z809	MTHFD1	0.093191	0.913482
Delta-1-pyrroline-5-carboxylate dehydrogenase, mitochondrial	A0A024RAD8;P30038	ALDH4A1	0.0773356	0.913482
Inactive tyrosine-protein kinase 7	Q13308;Q59FV9	PTK7	0.124281	0.913482
Haptoglobin;Haptoglobin alpha chain;Haptoglobin beta chain	P00738;A0A0C4DGL8;J3QLC9;J3QR68;H0Y300;Q6NSB4;A0A087WU08;Q6PEJ8;B3KP77;H3BS21	HP	-0.429063	0.913482
Exocyst complex component 2	B3KPN7;A0A024QZT2;Q96KP1;B4DZI7	EXOC2	0.131698	0.913482
26S proteasome non-ATPase regulatory subunit 8	K7EJR3;Q5U0B3;R4GMR5;V9HW09;P48556;K7EJC1;B4E2Y4	PSMD8;HEL-S-91n	0.122005	0.913482
Protein S100;Protein S100-A6	R4GN98;P06703	S100A6	-0.102874	0.913482
Proteasome activator complex subunit 3	K7ENH2;K9J957;V9HWJ8;A0A024R203;P61289;J7FRP4;A0A087WTV2;B3KQ25;K7ESG5;Q6FHK7	PSME3;HEL-S-283	0.0964697	0.913482
RNA-binding protein FUS	Q59H57;B4DR70;A8K4H1;Q8TBR3;Q6IBQ5;H3BPE7;Q13344;P35637;Q70T18	FUS	-0.137729	0.913482
COP9 signalosome complex subunit 3	Q9UNS2;H7C3P9;B4DN01	COPS3	-0.148472	0.913482
Peptidyl-prolyl cis-trans isomerase FKBP10	A0A024R1W3;Q96AY3;B4DJJ5;Q658U4;Q8NAG5;Q6ZME7;H0Y827	FKBP10;DKFZp666D193	0.155509	0.913482
Peptidyl-glycine alpha-amidating monooxygenase;Peptidylglycine alpha-hydroxylating monooxygenase;Peptidyl-alpha-hydroxyglycine alpha-amidating lyase	P19021;B4DKE0;H7BYD9	PAM	-0.127199	0.913482
60S ribosomal protein L27	E4W6B6;B2R4D8;A0A024R1V4;P61353;K7ELC7;K7EQQ9	RPL27	-0.113497	0.913482
Microsomal glutathione S-transferase 3	Q53GB9;A0A024R8Z1;Q5VV89;O14880;Q5VV87	MGST3	-0.190727	0.913482
Mitochondrial import inner membrane translocase subunit Tim10	P62072	TIMM10	0.185985	0.913482
Mitochondrial import inner membrane translocase subunit TIM44	Q53G69;O43615;Q9UPE4;M0QXU7	TIMM44;hTIM44	-0.163619	0.913482
Adenylyl cyclase-associated protein;Adenylyl cyclase-associated protein 1	D3DPU2;B2RDY9;B4DNW7;Q01518;B4DI38;B4DNY3;B4DNA3;B4DUZ8	CAP1	-0.113982	0.913482
Insulin-like growth factor 2 mRNA-binding protein 2	F8W930;Q9Y6M1;B4DKT5	IGF2BP2	0.0937215	0.913482
14-3-3 protein sigma	P31947	SFN	-0.0600228	0.913482
Calcium/calmodulin-dependent protein kinase type II subunit beta	A4D2J9;Q13554;D3DVK8;Q53H78	CAMK2B	0.211561	0.913482
Poly [ADP-ribose] polymerase 1	A0A024R3T8;P09874;B4E0E1;B2R5W3	PARP1	-0.0792721	0.913482
Leucine-rich repeat-containing protein 47	A0A024R4G1;Q8N1G4	LRRC47	0.107486	0.913482
ELKS/Rab6-interacting/CAST family member 1	X6RLX0;Q8IUD2;G8JLD3;X6RM00;B4DG07	ERC1	-0.102066	0.913482
Hydroxysteroid dehydrogenase-like protein 2	Q6YN16;B2R923;A0A024R159;B4E136	HSDL2	0.149688	0.913482
Aconitate hydratase, mitochondrial	A0A0K0K1H7;A2A274;Q99798;B4DZ08;B2RBW5;B4DJW1;B4DW08	ACO2	0.064821	0.913551
Guanine nucleotide-binding protein G(I)/G(S)/G(T) subunit beta-1	B2R6K4;A0A024R056;P62873;F6UT28;B1AKQ8;F6X3N5	GNB1	0.199239	0.914616
Lumican	P51884;Q53FV4	LUM	-0.24614	0.914616
Surfeit locus protein 4	Q5T8U5;Q5T8U7;O15260;B7Z605;B7Z8F3;B7Z7A8	SURF4	-0.130919	0.914616
39S ribosomal protein L41, mitochondrial	Q8IXM3	MRPL41	0.108248	0.914616
Signal recognition particle 9 kDa protein	P49458	SRP9	0.10778	0.914616
ADP-ribosylation factor-like protein 8A	B2R7U5;A0A024R977;Q96BM9	ARL8A	0.180719	0.914616
RNA-binding protein 14	A0A0S2Z4Z0;Q96PK6;Q59GV2	RBM14	-0.15801	0.915039
LIM domain-binding protein 3	V5T7C5;O75112;B4DGP4;A0A0S2Z501	LDB3	0.0769894	0.915039
Serpin B6	A0A024QZX3;P35237;A0A024QZX5;A0A087X1N8;Q8IXH2	SERPINB6	-0.0755823	0.915103
Protein disulfide-isomerase TMX3	Q3B7X1;Q96JJ7	TMX3	-0.0934444	0.91661
Thyroid hormone receptor-associated protein 3	Q9Y2W1	THRAP3	0.174272	0.91661
Heterogeneous nuclear ribonucleoprotein Q	Q05CK9;O60506;B2R8Z8;Q59GL1;B7Z645	SYNCRIP	0.0957073	0.91661
Eukaryotic translation elongation factor 1 epsilon-1	O43324;D6RBD7;C9J1V9;H0YAL7	EEF1E1;EEF1E1-BLOC1S5	0.0912313	0.91661
3(2),5-bisphosphate nucleotidase 1	V9HWF9;O95861;A6NF51;F8W1J0;B7Z9J7	HEL20;BPNT1	0.13442	0.91661
DNA-dependent protein kinase catalytic subunit	P78527	PRKDC	0.141258	0.91661
Quinone oxidoreductase	Q08257;A6NP24;C9JH92	CRYZ	-0.0964883	0.91661
Thrombospondin type-1 domain-containing protein 4	Q6ZMP0	THSD4	0.196746	0.91661
ATP synthase subunit d, mitochondrial	O75947;A0PJH2	ATP5H	-0.0801415	0.91661
Pentatricopeptide repeat domain-containing protein 3, mitochondrial	Q96EY7;B2RDU4	PTCD3	0.0902598	0.91661
Carnitine O-palmitoyltransferase 2, mitochondrial	A0A140VK13;A0A1B0GVF3;P23786;A0A1B0GTB8;A0A1B0GWC0;A0A1B0GV75	CPT2	0.0708613	0.91661
Glutathione reductase, mitochondrial	V9HW90;P00390	HEL-75;GSR	0.100669	0.91661
SAFB-like transcription modulator	Q9NWH9;H7BXE3;A0A024R5X3;H0YL55	SLTM	0.132466	0.91661
Homer protein homolog 1	Q53F18;Q86YM7;Q5U5K4;Q86YM6	HOMER1	-0.216009	0.91661
Acyl-coenzyme A thioesterase 13;Acyl-coenzyme A thioesterase 13, N-terminally processed	Q9NPJ3	ACOT13	0.0758528	0.916967
KH domain-containing, RNA-binding, signal transduction-associated protein 1	B4DDX2;Q07666;B4E043;B2R7B5	KHDRBS1	-0.0961209	0.916967
5(3)-deoxyribonucleotidase, cytosolic type	V9HWF3;Q8TCD5;J3KRC4;J3KSY6	HEL74;NT5C	0.250611	0.916967
ELMO domain-containing protein 2	D6RBS5;Q8IZ81;V9GY58;D6RHX2	ELMOD2	-0.160741	0.916967
Pyridoxal phosphate phosphatase	A0A024R1I3;Q96GD0	PDXP	-0.078476	0.916967
Redox-regulatory protein FAM213A	Q9BRX8	FAM213A	-0.104448	0.916967
ELAV-like protein 1	Q15717;M0QZR9	ELAVL1	0.087339	0.916967
AP-3 complex subunit delta-1	O14617;Q6PK82	AP3D1	-0.148554	0.918249
Rab3 GTPase-activating protein non-catalytic subunit	Q9H2M9	RAB3GAP2	0.121999	0.918511
1,4-alpha-glucan-branching enzyme	Q04446;Q59ET0;E9PGM4;B4DUF1;B4DNJ3	GBE1	0.0661814	0.919265
AP-2 complex subunit sigma	M0R0N4;M0QYZ2;P53680;M0QZ21;X6R390	AP2S1	-0.306184	0.919265
Medium-chain specific acyl-CoA dehydrogenase, mitochondrial	A0A0S2Z366;Q5T4U5;Q5HYG7;P11310;B7Z9I1;B4DWX6;B4DJE7;B4DVE0	ACADM;DKFZp686M24262	-0.109398	0.919265
Transducin beta-like protein 2	E9PF19;B4DY50;A0A0S2Z5F3;Q8N2L6;B2RB52;Q9Y4P3;B4DY59;Q96E41	TBL2	-0.209078	0.919548
Cysteine and glycine-rich protein 1	B4DY28;P21291;Q9BTA4;B3KVC9;Q6ZMS3;B4E2T4;E9PND2;E9PS42;Q59EQ5;E9PP21;Q6AI18	CSRP1;DKFZp686M148	0.208323	0.920746
Annexin A3;Annexin	P12429;D6RA82	ANXA3	0.0813983	0.921272
Cellular retinoic acid-binding protein 2	P29373;Q5SYZ4	CRABP2	0.174663	0.921272
Protein CASP	Q13948	CUX1	0.231511	0.921272
Collagen alpha-1(XIV) chain	Q05707;A8KAL5;J3QT83	COL14A1	-0.122363	0.921272
Diphosphoinositol polyphosphate phosphohydrolase 2	A0A024RBD0;Q9NZJ9;F8VRL4;F8VRR0;A0A0C4DGJ4	NUDT4	-0.150788	0.921272
ATP-dependent RNA helicase A	Q08211;Q58F26;Q6PJK6	DHX9	0.0917781	0.921272
Coiled-coil domain-containing protein 69	D3DQH5;A6NI79;H0YBY5;Q7L2X4	CCDC69	-0.233209	0.921272
Thioredoxin, mitochondrial	B4DX69;Q99757;M0QXH0	TXN2	-0.12576	0.921272
Succinate-semialdehyde dehydrogenase, mitochondrial	X5DQN2;X5D299;P51649;C9J8Q5;A8K435	ALDH5A1	0.0954314	0.921272
KN motif and ankyrin repeat domain-containing protein 2	Q63ZY3	KANK2	0.132348	0.921272
Glutathione S-transferase P	V9HWE9;P09211;A8MX94	HEL-S-22;GSTP1	-0.0934245	0.921272
Solute carrier family 2, facilitated glucose transporter member 1	B3KVN0;Q0P512;Q59GX2;P11166;B4DKW1;B4DDR6	SLC2A1	0.0914334	0.921272
14-3-3 protein theta	P27348;B4DMT8;Q53S41;B4DY04;E9PG15	YWHAQ	0.091657	0.921272
Protein disulfide-isomerase;Protein disulfide-isomerase A3	B3KQT9;V9HVY3;P30101	HEL-S-269;PDIA3	-0.0748963	0.921272
Coronin;Coronin-1C	Q53G58;B3KN06;A0A024RBI5;Q59EA2;Q9ULV4;B4DMH3;B4E3S0;B7Z9V0	CORO1C	0.154356	0.921272
NA	B7ZA42	NA	0.0777984	0.921272
Proliferating cell nuclear antigen	Q6FHF5;P12004;Q6FI35	PCNA	0.364289	0.921272
Platelet-activating factor acetylhydrolase IB subunit gamma	A0A024R0L6;Q15102;M0R389;M0R1K3	PAFAH1B3	-0.112541	0.921272
Mitochondrial pyruvate carrier 2	Q5R3B4;B2R4Q7;A0A024R8Z5;O95563	MPC2;BRP44	-0.131691	0.921272
Proteasome subunit alpha type-4;Proteasome subunit alpha type;Proteasome subunit beta type	P25789;H0YN18;B2RDG0;H0YMZ1;H0YL69;H0YMA1;H0YKT8	PSMA4	-0.0798241	0.921272
Signal transducer and activator of transcription 1-alpha/beta;Signal transducer and activator of transcription	P42224;J3KPM9	STAT1	0.12934	0.921272
60S ribosomal protein L27a	Q9BQQ5;E9PLL6;Q6NZ52;P46776;E9PJD9;E9PLX7	L27a;RPL27A	-0.096273	0.921272
Voltage-dependent anion-selective channel protein 1	P21796;B3KTS5	VDAC1	0.0597612	0.921272
Probable ATP-dependent RNA helicase DDX46	A8K6X3;A0A0C4DG89;Q7L014;D3DQA6	DDX46	0.113397	0.921272
Exportin-7	A8K607;Q9UIA9;E7ESC6;D3DSQ7;B4DSP8	XPO7	0.122432	0.921272
Galectin-1	P09382	LGALS1	0.171178	0.921272
Basement membrane-specific heparan sulfate proteoglycan core protein;Endorepellin;LG3 peptide	A0A024RAB6;P98160	HSPG2	-0.072671	0.921272
Cullin-1	B4DLA3;A0A0C4DGX4;A0A090N7U0;Q13616;Q75MQ1;B3KTW0	CUL1	-0.10091	0.921272
Kinesin light chain 1	Q7RTQ9;Q7RTQ7;G5E9S8;G3V2E7;B5BU63;Q7RTQ8;Q7RTQ2;G3V3H3;Q7RTQ1;Q7RTQ0;G3V5R9;Q7RTP8;E7EVH7;Q07866;F8W6L3;B4DGB3;Q7RTQ4;B4DS14;Q7Z5D5	KNS2;KLC1	-0.230918	0.921272
Lysosome-associated membrane glycoprotein 1	B3KRY3;A0A024RDY3;P11279	LAMP1	-0.0980938	0.921272
NEDD8-conjugating enzyme Ubc12	A0A024R4T4;P61081	UBE2M	0.15865	0.921272
Mitotic checkpoint protein BUB3	J3QT28;A0A140VJF3;O43684;B4DDM6;J3QSX4	BUB3	-0.162807	0.921272
NA	B4E106	NA	-0.156615	0.921272
Fibrinogen gamma chain	C9JC84;P02679;A0A140VJJ6;C9JEU5;D3DP16;Q7Z664	FGG;DKFZp779N0926	-0.252147	0.921272
Ribosomal protein L15;60S ribosomal protein L15	A0A024R2Q4;P61313;B4DLP4;E7EQV9;E7ENU7;B4DEN1	RPL15	-0.0888035	0.921272
Acidic leucine-rich nuclear phosphoprotein 32 family member A	H0YN26;Q6PKH8;Q08AJ6;P39687;Q3KPI8	ANP32A	0.0759453	0.921272
Probable ATP-dependent RNA helicase DDX23	B3KY11;A0A024R0Z3;Q9BUQ8;A8KA56	DDX23	0.220678	0.921272
GTP-binding protein Rheb	Q6NZ61;A8K005;A0A090N900;Q15382;C9J931	RHEB	0.158503	0.921272
Guanine nucleotide-binding protein G(i) subunit alpha-2	P04899;B3KX51;Q96C71;B3KP24;Q93020	GNAI2;WUGSC:H_LUCA16.1	0.0836896	0.921272
40S ribosomal protein S9	A0A024R4M0;P46781;B5MCT8;C9JM19;B7Z732;A5D904	RPS9	-0.0660969	0.921272
Succinyl-CoA ligase subunit beta;Succinyl-CoA ligase [GDP-forming] subunit beta, mitochondrial	A0A024R325;Q96I99;Q3ZCW5;E9PDQ8	SUCLG2	0.087673	0.921272
Acyl-protein thioesterase 1	A0A087X1K9;E5RGR0;Q6IAQ1;B4DJV9;O75608;B4DP64	LYPLA1	0.0872188	0.921272
Sodium/potassium-transporting ATPase subunit alpha-2	B3KRI1;B1AKY9;B2RAQ4;A0A0S2Z3W6;P50993;B3KX35;H0Y7C1;B4DIQ8	ATP1A2	0.112539	0.921699
Serotransferrin	Q53H26;Q06AH7;P02787;B4DI57;B4DHZ6	TF	0.0915356	0.921699
NA	CON__Q3ZBD7	NA	0.182004	0.921699
Probable C->U-editing enzyme APOBEC-2	Q9Y235;B4DUL0	APOBEC2	0.13764	0.92209
Tubulin--tyrosine ligase-like protein 12	A0A024R4U3;Q14166	TTLL12	0.126768	0.92209
Endonuclease G, mitochondrial	E5KNL5;Q14249	ENDOG	0.135679	0.922198
Glypican-1;Secreted glypican-1	P35052;H7C410;A0A024R4D5;H7C024;Q59GI7	GPC1	0.126056	0.922198
Ataxin-10	Q9UBB4;Q7Z524	ATXN10	0.13175	0.922198
Malate dehydrogenase;Malate dehydrogenase, mitochondrial	Q75MT9;Q6FHZ0;A0A024R4K3;P40926;Q0QF37;G3XAL0;B3KTM1	MDH2	-0.0632992	0.922198
Eukaryotic translation initiation factor 4H	Q15056;Q75MU1;B4DMV6;Q75MU2;A4D198	EIF4H;WBSCR1;LOC392647	0.145388	0.922198
40S ribosomal protein S8	Q5JR94;P62241;Q5JR95;Q9BS10	RPS8	-0.0540691	0.922198
ATP-binding cassette sub-family F member 1	Q2L6I2;Q8NE71;Q59F96;H0YGW7;B4DNU2	ABCF1	0.146691	0.922198
Tripeptidyl-peptidase 1	B4DSE2;B4E0C7;Q53HP2;D3DQU2;O14773;B2R608;B4DE89	TPP1	-0.0920392	0.922198
60S ribosomal protein L29	A0A024R326;Q6IPI1;P47914	RPL29	0.139005	0.922198
Mitochondrial import inner membrane translocase subunit TIM50	Q0VAB1;A0A024R0M6;Q3ZCQ8;M0R0C3;M0R2F8	TIMM50	0.141663	0.922636
MOB kinase activator 1A;MOB kinase activator 1B	Q9H8S9;Q7L9L4;D6RCK3;B3KSH6;Q4W5E0	MOB1A;MOB1B;MOBKL1A;MOB4A	-0.0804135	0.923966
Amine oxidase [flavin-containing] A	Q53YE7;Q53EZ0;P21397;Q49A63;Q5ULA3	MAOA	-0.333933	0.923966
NA	CON__P08727	NA	-0.078104	0.924468
Aldose reductase	A0A024R7A8;P15121;Q59EL5;E9PCX2	AKR1B1	0.0809913	0.924973
Malate dehydrogenase;Malate dehydrogenase, cytoplasmic	V9HWF2;P40925;B9A041;B8ZZ51;C9JF79	HEL-S-32;MDH1	0.0596946	0.92563
Thioredoxin-dependent peroxide reductase, mitochondrial	P30048;Q53HC2	PRDX3	-0.0516362	0.926006
Tubulin alpha-1A chain;Tubulin alpha-3C/D chain;Tubulin alpha-3E chain	Q71U36;B4DQK4;Q1ZYQ1;Q13748;Q9UQM3;F8VQQ4;Q6PEY2	TUBA1A;TUBA2;TUBA3C;TUBA3E	0.0762564	0.926006
26S proteasome non-ATPase regulatory subunit 10	B1AJY7;O75832;B1AJY5	PSMD10	0.0836685	0.926006
NA	A0A087WZE9	HMGN3	0.126977	0.926006
Protein SET;Protein SETSIP	A0A0C4DFV9;B2RCX0;A0A024R895;Q5VXV3;Q01105;A0A087X027;P0DME0	SET;SETSIP	-0.0837972	0.926006
26S proteasome non-ATPase regulatory subunit 3	B3KNN7;Q8N9M2;O43242;B4DEB0;Q96N86;B4DV84;Q6IBN0;B4DPM7	PSMD3	0.0703428	0.926117
Secretory carrier-associated membrane protein 1	O15126;B4E2V7;A0A087WXB0;A8K2G0;A0A087WU14;B4DP10;Q96AZ4	SCAMP1	0.129534	0.926117
PI-PLC X domain-containing protein 3	B3KXD1;Q63HM9	PLCXD3	0.117579	0.926117
E3 ubiquitin/ISG15 ligase TRIM25	Q14258	TRIM25	0.13602	0.926117
2-methoxy-6-polyprenyl-1,4-benzoquinol methylase, mitochondrial	Q5HYK3;F8VVW7;F8VVX6;F8VP53;B4DP72	COQ5	-0.26384	0.926117
Insulin-degrading enzyme	P14735;Q59GA5;B7Z7W6;B3KSB8	IDE	0.109661	0.926117
Transaldolase	A0A140VK56;P37837;F2Z393	TALDO1	-0.0783758	0.926117
3-ketoacyl-CoA thiolase, peroxisomal	Q8NCW8;B4DEN6;A0A024R2M6;P09110;H7C131;C9JDE9;A0A140VJX0;H0Y4D4	ACAA1	-0.121459	0.926117
NHL repeat-containing protein 2	Q8NBF2	NHLRC2	-0.105359	0.926117
Myristoylated alanine-rich C-kinase substrate	P29966;Q6NVI1	MARCKS	-0.154801	0.926117
Adenylate kinase 4, mitochondrial	P27144;D3DQ64	AK4	-0.0928221	0.926117
Kinesin-like protein KIF13A	Q9H1H9;A0A1B0GUA8	KIF13A	0.0901612	0.926117
Paraspeckle component 1	A0A024RDP4;B4DWI8;Q8WXF1;X6RDA4	PSPC1	0.0893829	0.926117
Transcriptional activator protein Pur-alpha	Q2NLD4;Q2NLC9;Q56A79;Q00577	PURA	-0.134156	0.926117
Long-chain-fatty-acid--CoA ligase 1	A8K9T3;P33121;E7EPM6;B4E0R0;B7Z3Z9	ACSL1	-0.0745375	0.926117
Persulfide dioxygenase ETHE1, mitochondrial	A0A0S2Z580;A0A0S2Z5B3;M0QXB5;O95571;B2RCZ7;A0A0S2Z5N8	ETHE1	0.0821327	0.926117
Serine/threonine-protein phosphatase;Serine/threonine-protein phosphatase 5	Q9BPW0;H0YDU8;Q53FR0;A0A024R0Q7;P53041;B4DLP6;B2R6R6;A8MU39;B4DDZ8	PPP5C	-0.212827	0.926117
Peptidyl-prolyl cis-trans isomerase;Peptidyl-prolyl cis-trans isomerase C	A8K2Q6;P45877	PPIC	0.127579	0.926117
V-type proton ATPase subunit d 1	B2R7M1;F5GYQ1;P61421;R4GN72;B7Z6L9;J3QL14;B7Z788	ATP6V0D1	-0.087477	0.926117
NA	Q6P5S8	IGK@	0.158403	0.926117
Arginine--tRNA ligase, cytoplasmic	P54136;B4DXW6	RARS	0.0798603	0.926117
Golgi integral membrane protein 4	O00461;F8W785	GOLIM4	0.189563	0.926117
60S ribosomal protein L35a	P18077;C9K025;F8WBS5;F8WB72	RPL35A	0.0903379	0.926117
Tropomyosin alpha-4 chain	V9HW56;P67936;B4DVY2	HEL-S-108;TPM4	-0.197295	0.926117
Microfibrillar-associated protein 2	A0A024RA94;P55001	MFAP2	0.0994003	0.926117
Enoyl-CoA delta isomerase 1, mitochondrial	P42126;Q96DC0;H3BS70	ECI1;DCI	-0.0869534	0.926117
NA	F8W0P7	ATP5B	0.103058	0.926117
Histone H1.4	Q4VB24;A3R0T8;P10412;B2R984;A3R0T7	HIST1H1E	-0.0650471	0.926117
Cardiac phospholamban	Q5R352;P26678	PLN	0.11534	0.926117
Nuclease-sensitive element-binding protein 1	P67809;Q6PKI6;Q7KZ24;H0Y449	YBX1	-0.104455	0.926117
39S ribosomal protein L15, mitochondrial	Q9P015;B2R739;E5RIZ4;E5RHF4	MRPL15	-0.0830841	0.926117
Dolichyl-diphosphooligosaccharide--protein glycosyltransferase subunit 1	Q6IBR0;P04843;Q96HX3;Q53EP4;B4DL99;B7Z4L4;B4DNJ5	RPN1	0.054212	0.926117
Ribosyldihydronicotinamide dehydrogenase [quinone]	Q5TD07;B3KPX6;A0A024QZT9;P16083;Q5TD05;Q59EN2	NQO2	-0.0960202	0.926117
Probable cysteine--tRNA ligase, mitochondrial	Q9HA77	CARS2	0.0918821	0.926117
Glia maturation factor beta	G3V4P8;P60983	GMFB	-0.0979316	0.926117
UPF0317 protein C14orf159, mitochondrial	Q6IA66;B3KVU6;Q4LE40;Q7Z3D6;Q53HP9;H0YB09;A0A0C4DGD4;H0YB62	C14orf159;C14orf159 variant protein	-0.11856	0.926117
60S ribosomal protein L12	P30050;Q59FI9	RPL12	-0.0559417	0.926117
Heterogeneous nuclear ribonucleoprotein D0	A0A024RDF4;A0A024RDF3;Q14103;H0Y8G5;D6RAF8	HNRPD;HNRNPD	-0.0730471	0.926117
Protein phosphatase 1A	B5BUD5;B2R8E4;A0A024R6A5;P35813	PPM1A	-0.161802	0.926117
Guanine nucleotide-binding protein subunit beta-2-like 1;Guanine nucleotide-binding protein subunit beta-2-like 1, N-terminally processed	E9KL35;P63244;J3KPE3;D6RAC2;D6REE5;H0YAF8;H0Y8W2;D6RHH4;H0YAM7;D6R9Z1;D6R9L0	GNB2L1	0.136441	0.926117
Serine/threonine-protein phosphatase PGAM5, mitochondrial	Q96HS1	PGAM5	0.0694846	0.926117
Leucine-rich repeat flightless-interacting protein 2	A0A024R2K4;Q9Y608	LRRFIP2	0.0576036	0.926117
Heterogeneous nuclear ribonucleoprotein U	B3KX72;Q00839;Q96BA7;B4DLR3;Q7Z4Q5	HNRNPU;HNRPU	-0.0653801	0.926117
U2 small nuclear ribonucleoprotein A	Q53G61;Q53G21;P09661;H0YLR3;H0YMA0	SNRPA1	0.112795	0.926117
Ribosome maturation protein SBDS	A0A0S2Z5I7;Q9Y3A5;A0A087X020	SBDS	-0.0957627	0.926117
60S ribosomal protein L10a;Ribosomal protein	P62906;Q1JQ76;A0A024RCW3	RPL10A	0.0621567	0.926117
Eukaryotic translation initiation factor 3 subunit B	B4DV79;A4D210;A0A024R821;P55884;B4DXN6;Q96G38;Q86UM1	EIF3B;EIF3S9	0.0935026	0.926117
T-complex protein 1 subunit delta	P50991;A8K3C3;B7Z9L0;B7Z2Z8;B7Z2F4	CCT4	0.0579818	0.926117
Translational activator GCN1	E1NZA1;Q92616;A0A024RBS1	PRIC295;GCN1L1	-0.0988853	0.926117
Phosphatidylethanolamine-binding protein 1;Hippocampal cholinergic neurostimulating peptide	D9IAI1;P30086;A0A0K0K1J6;B4DRT4;V9HW05	HEL-S-34;PEBP1;HEL-210	-0.0711142	0.926117
Peroxiredoxin-4	V9HW63;Q13162;H7C3T4	HEL-S-97n;PRDX4	-0.0453262	0.926117
Latent-transforming growth factor beta-binding protein 1	Q14766;E7EV71;B7ZLY3	LTBP1	-0.108333	0.926117
Microtubule-associated protein;Microtubule-associated protein 4	E7EVA0;P27816	MAP4	-0.0682413	0.926117
Transcription activator BRG1	A7E2E1;Q9HBD4;B9EGQ8;A0A0A0MT49;P51532;B4E0F1;B4DSI8;B3KNW7;Q59FZ6	SMARCA4	0.156692	0.926117
Pinin	A8K964;Q9H307	PNN	-0.110886	0.926117
CDP-diacylglycerol--inositol 3-phosphatidyltransferase	B3KSW0;Q53HA5;A8K3L7;B3KY94;O14735;H3BUR9	CDIPT	-0.0853877	0.926117
Band 4.1-like protein 3;Band 4.1-like protein 3, N-terminally processed	A0A0A0MRA8;Q9Y2J2;A0A0A0MSA4;A0A1B0GTF8;B7Z8M8	EPB41L3	-0.099716	0.926117
NA	Q71U02	NA	0.16501	0.926117
Eukaryotic translation initiation factor 4 gamma 1	B4DSI9;B4DGF1;B2RU10;B2RU06;Q4LE58;Q04637;Q96I65	EIF4G1;EIF4G1 variant protein	0.124477	0.926332
Vacuolar protein sorting-associated protein 45	Q9NRW7;A0AR27;B7Z5E4;A0A087WU65;B7Z360;B7Z5D4;A0A1B0GXI6;Q5T4Q0;B7Z1J7	VPS45	0.146885	0.926857
Proteasomal ubiquitin receptor ADRM1	Q68E00;Q16186;B4DMP7;A0A087WX59	DKFZp686G2045;ADRM1	0.118929	0.926857
Ezrin	Q6NUR7;E7EQR4;P15311;V9HW42;B2R6J2;B7Z5V2;B7Z437	EZR;HEL-S-105	0.0931476	0.926863
Histone H3.2;Histone H3.1;Histone H3;Histone H3.3;Histone H3.3C	Q71DI3;P68431;B4E380;K7EK07;B2R4P9;P84243;K7EMV3;B4DEB1;B2R6Y1;A8K4Y7;K7ES00;Q6NXT2	HIST2H3A;HIST1H3A;H3F3B;H3F3A;H3F3C	0.0934899	0.926863
NAD-dependent protein deacetylase sirtuin-3, mitochondrial	E9PM75;B7Z5J1;Q9NTG7;E9PK80;B7Z580;B7Z7G4;E9PN58;B7Z777	SIRT3	-0.126732	0.927111
Keratin, type II cytoskeletal 8	CON__P05787;P05787;Q969I0;F8VUG2;Q7L4M3	KRT8	0.0634483	0.927157
Splicing factor 1	A0A024R588;A0A024R566;B4DJU4;A0A024R5D9;A0A024R572;Q15637;B4DX42	SF1	0.146545	0.927157
Heat shock protein beta-6	V9HWB6;O14558;B4DNC2;K7EP04	HEL55;HSPB6	-0.118885	0.927157
Trifunctional enzyme subunit alpha, mitochondrial;Long-chain enoyl-CoA hydratase;Long chain 3-hydroxyacyl-CoA dehydrogenase	E9KL44;P40939;B4DRH6;B4DDZ5	HADHA	-0.0461445	0.927157
Signal recognition particle subunit SRP68	Q9UHB9;B4DVI7;B3KMI9;Q96K98	SRP68	0.127202	0.927157
Phosphoglycerate mutase 1;Phosphoglycerate mutase	Q6P6D7;Q6FHU2;P18669;Q53G35;Q6FHK8;B4DKL5;B4DMJ7	PGAM1;hCG_2015269	-0.047162	0.927157
Actin, cytoplasmic 2;Actin, cytoplasmic 2, N-terminally processed	P63261;B4E3A4;B4DVQ0;I3L3I0;I3L1U9	ACTG1	-0.101451	0.927157
Guanine nucleotide-binding protein G(o) subunit alpha	A0A142CHG9;P09471;Q8N6I9;B3KP89;H3BTM2;H3BN82	GNAO1	0.0828611	0.927623
NA	A0A0A0MRL6;F8W8M4;J3QSX6	ABLIM1	0.0818518	0.928441
40S ribosomal protein S12	P25398	RPS12	0.0537071	0.928441
Coiled-coil domain-containing protein 22	A0A024QZ03;O60826;B7ZAR0;B4DPB6	CCDC22	-0.124936	0.928441
Ras-related protein Rab-14	A0A024R845;P61106;X6RFL8	RAB14	0.101392	0.928441
Ubiquitin carboxyl-terminal hydrolase isozyme L3;Ubiquitin carboxyl-terminal hydrolase	A0A140VJZ4;P15374;A0A087WTB8;Q5TBK7	UCHL3	0.0741358	0.928441
Leukotriene A-4 hydrolase;Leukotriene A(4) hydrolase	A0A140VK27;P09960;B4DVZ8;Q59ES1	LTA4H	0.074751	0.928441
S-(hydroxymethyl)glutathione dehydrogenase;Alcohol dehydrogenase class-3	Q6IRT1;Q6FI45;P11766;Q5U043;Q2VIM7;H0YAG8	ADH5	-0.0733585	0.929203
Poly(rC)-binding protein 1	Q53SS8;Q15365	PCBP1	-0.0809145	0.929203
Integrin alpha-V;Integrin alpha-V heavy chain;Integrin alpha-V light chain	A5YM53;L7RXH0;P06756	ITGAV	-0.0958028	0.929203
Putative elongation factor 1-alpha-like 3;Elongation factor 1-alpha;Elongation factor 1-alpha 1	Q5VTE0;Q6IPT9;Q6IPS9;Q6IPN6;Q53HM9;P68104;A8K9C4;Q53HR5;Q53HQ7;Q53GA1;Q53G85;Q96RE1;A0A087WVQ9;B4DV42;A0A087WV01;Q9H2I7;Q53G89;Q8IUB0;Q53HR1;B4DNE0;Q504Z0;B4E2C5;Q16577	EEF1A1P5;EEF1A1;EEF1A1L14;PTI-1	0.0504902	0.929203
Tubulin beta-4A chain	P04350;B4DE77;B4DJ43;B4DFH6	TUBB4A	0.14044	0.930078
L-lactate dehydrogenase;L-lactate dehydrogenase B chain	Q5U077;P07195;A8MW50;C9J7H8	LDHB	0.0489366	0.930931
Apolipoprotein C-III	A3KPE2;B0YIW2;P02656	APOC3	0.437373	0.930931
[Pyruvate dehydrogenase (acetyl-transferring)] kinase isozyme 1, mitochondrial	Q15118;Q53R49;B7Z7N6;B7Z207;C9IYB4	PDK1	0.087546	0.931231
Histidine--tRNA ligase, cytoplasmic	P12081;B4DDD8;B3KWE1;Q52NV4;B4E1C5;E7ETE2;B4DEA2	HARS;HRS	0.0785995	0.931618
Glutathione S-transferase Mu 2	Q0D2I8;P28161;E9PHN7;A8HT81;E9PHN6;F6XZQ7;E9PLF1	GSTM2	-0.0733613	0.932684
Nuclear pore complex protein Nup155	E9PF10;B4DLT2;A0A024R071;O75694	NUP155	-0.158848	0.932684
Translin	E9PGT1;Q15631;H7C1D4;Q53GR3;B3KRM8;B7Z5D9	TSN	0.0836407	0.932684
Histone-lysine N-methyltransferase SMYD1	Q8NB12;E9PHG3;Q5GJ33;Q5HYE8;Q5GJ32	SMYD1;DKFZp313O0925	-0.0690297	0.93279
NA	CON__Q3SX09	NA	-0.355937	0.933715
ATP-dependent 6-phosphofructokinase, liver type	P17858;Q7L2M7	PFKL	-0.0589573	0.933715
NADH dehydrogenase [ubiquinone] iron-sulfur protein 4, mitochondrial	A0A0S2Z433;O43181;H0Y9M8	NDUFS4	0.0918932	0.933715
UPF0585 protein C16orf13	A0A087WYU2;Q96S19;H3BS73;H3BNB2	C16orf13	0.0828032	0.933994
Very long-chain specific acyl-CoA dehydrogenase, mitochondrial	P49748;Q53HR2;B4DEA8;B3KPA6;B3KPX1	ACADVL	0.0853233	0.936217
IST1 homolog	A8K5S3;P53990;H3BQF7;H3BMU1;H3BUI0;B4DLP1;F5GXM3;J3KR23;B4DHF3	IST1	0.102694	0.936256
Pyruvate dehydrogenase E1 component subunit alpha;Pyruvate dehydrogenase E1 component subunit alpha, somatic form, mitochondrial	A0A024RBX9;P08559;Q53GE3;A5YPB6;A5PHJ9	PDHA1;PDHA1/LOC79064	-0.101727	0.936405
3-hydroxyacyl-CoA dehydrogenase type-2	A0A0S2Z410;Q99714;Q5H928;A0A0S2Z434	HSD17B10	-0.0741353	0.936447
Histidine triad nucleotide-binding protein 1	P49773	HINT1	0.0759341	0.936447
NA	CON__P02754	NA	-0.245924	0.93963
General transcription factor II-I	X5D2J9;Q499G6;X5D939;X5DNP5;A8K9W7;X5DR09;P78347;B4DH52;B4DRA9	GTF2I	0.0850993	0.940327
Tyrosine-protein phosphatase non-receptor type;Tyrosine-protein phosphatase non-receptor type 1	A8K3M3;P18031;B4DSN5	PTPN1	-0.0856082	0.940327
Ras suppressor protein 1	Q32Q10;Q15404;B0YJ73	RSU1	0.0713053	0.941021
Serine/threonine-protein phosphatase;Serine/threonine-protein phosphatase PP1-gamma catalytic subunit	Q9UPN1;F8VYE8;A0A024RBP2;P36873;F8VR82;F8W0W8;A0A087WYY5	PPP1CC	0.142717	0.941021
GTP-binding nuclear protein Ran	B5MDF5;P62826;J3KQE5;F5H018;H0YFC6	RAN	0.0690128	0.941021
Thrombospondin-1	P07996;A0A024R9Q1;CON__Q28194	THBS1	0.0709455	0.941021
Dynactin subunit 3	O75935;X6RA56;X6RCK5;A0A0A0MRV8;Q8NB28;X6RLR1	DCTN3	-0.0907443	0.941021
Serine/arginine-rich splicing factor 4	A0A0D9SEM4;Q53F45;A8K644;Q08170;Q59EF5;B4DEM8	SRSF4;SFRS4	-0.104078	0.941021
Bone marrow stromal antigen 2	A0A024R7H5;B4E0Z6;Q10589	BST2	-0.129965	0.941021
Ryanodine receptor 2	Q92736;H7BY35	RYR2	0.080056	0.941021
28S ribosomal protein S34, mitochondrial	C9JJ19;P82930;A4UCR9	MRPS34	-0.139986	0.941021
Protein NipSnap homolog 2	O75323	GBAS	-0.0664192	0.941021
Protein transport protein Sec61 subunit alpha isoform 2	F8W776;Q9H9S3;B3KQ68;Q8TC24	SEC61A2	-0.079685	0.941217
Transmembrane emp24 domain-containing protein 7	A0A0A6YYA0;Q9Y3B3;B4E2C1;Q3B7W7	TMED7-TICAM2;TMED7	0.169793	0.941217
Destrin	V9HWA6;P60981;F6RFD5;B7Z9M9	HEL32;DSTN	0.0789706	0.941217
Serum paraoxonase/arylesterase 2	B4DKM6;A0A0J9YXF2;J3QT77;A0A0J9YYG4;B4DW02;Q15165	PON2	-0.0732155	0.941217
NA	A7MD96	SYNPO	0.130486	0.941217
60S ribosomal protein L24	C9JXB8;C9JNW5;V9HW01;P83731	RPL24;HEL-S-310	-0.0464536	0.941217
Laminin subunit beta-1	G3XAI2;P07942;Q8TAS6	LAMB1	-0.0811997	0.941217
Tenascin-X	A0A140TA52;A0A140TA41;A0A140TA33;P22105;A0A140T9C0;A0A140T902;A0A140T8Y3;A0A140T8Z8;A0A140T956;A0A087X0I0	TNXB	0.154562	0.941217
Tetraspanin;CD151 antigen	E9PMR4;A0A024RCB3;P48509;E9PRJ3;Q53FU5	CD151	-0.145405	0.941217
Proteasome activator complex subunit 2	Q86SZ7;Q2TNB3;A0A087X1Z3;Q9UL46;H0YM70;Q6FHK9	PSME2	0.0810947	0.941217
Proteasome subunit beta type;Proteasome subunit beta type-6	Q6IAT9;P28072	PSMB6	-0.0840472	0.941217
ES1 protein homolog, mitochondrial	A0A140VKB0;A0A0B4J2D5;A0A096LPI6;P30042;A0A096LNH5;A0A0B4J2H4;H7C1F6;H7C2G3	C21orf33	0.0586986	0.941217
Muscular LMNA-interacting protein	Q5VWP3;E2QRH6	MLIP	-0.118502	0.941217
UTP--glucose-1-phosphate uridylyltransferase	Q16851;B2RAN1;A0A087WYS1;E7EUC7;B4DUP2;Q53QE9	UGP2	-0.0355868	0.941217
Radixin	B0YJ88;P35241;B7Z2S7;Q6PKD3;Q05CU6	RDX	0.075427	0.941217
Pre-mRNA-processing factor 40 homolog A	O75400;B4DPY2;Q4ZG51	PRPF40A;FNBP3	0.141237	0.943148
EPM2A-interacting protein 1	Q7L775	EPM2AIP1	0.080494	0.94319
Serine/threonine-protein kinase 26;Serine/threonine-protein kinase 25	Q8NBY1;Q499L9;B4E0Y9;Q9P289;Q9NWX4;C9JDH9;C9J6L2;C9JCC0;C9J232;H7C279;Q5CZ67;B4E185;B3KRS6;A0A0S2Z4Y2;B4DVS7;Q96BA2;A0A024R4B2;O00506	STK26;MST4;STK25;DKFZp686J1430	-0.13166	0.94319
Coiled-coil domain-containing protein 6	Q05CP8;A0A024QZJ7;Q16204	CCDC6	-0.0870126	0.94319
Mitochondrial carrier homolog 1	A8YXX5;Q9Y374;A4FVA6;A0A024RD08;A0A024RCX4;Q9NZJ7;H0Y8C3;Q8IW90	PIG60;MTCH1	-0.0635618	0.943639
LIM domain only protein 7	E9PMT2;F8WD26;F8J2B5;J3KP06;Q8WWI1;A0A0A0MTE2;H0Y424	LMO7	0.0607606	0.943817
LETM1 and EF-hand domain-containing protein 1, mitochondrial	O95202;D3DVQ1	LETM1	0.0812431	0.943817
High mobility group protein B3	E7ES08;E7EQU1;O15347;E9PES6;Q7Z684	HMGB3;DKFZp779G118	-0.198817	0.943817
Carnitine O-acetyltransferase	P43155	CRAT	0.0549336	0.943817
60S ribosomal protein L7a	P62424;Q5T8U3	RPL7A	-0.0534035	0.944063
Protein S100;Protein S100-A11;Protein S100-A11, N-terminally processed	V9HWH9;P31949;B2R5H0	HEL-S-43;S100A11	0.169374	0.944063
Calnexin	P27824	CANX	-0.0518346	0.944063
Vesicle-trafficking protein SEC22b	O75396	SEC22B	0.0889617	0.944449
Small nuclear ribonucleoprotein Sm D1	P62314;Q7Z5A3;J3QLI9	SNRPD1	-0.0577613	0.944449
Argininosuccinate synthase	Q5T6L4;P00966;A8KAP9;B4E395	ASS;ASS1	0.0918768	0.944449
Non-specific lipid-transfer protein	B2R761;P22307;B4E0J3;H0YF61	SCP2	0.145502	0.944449
Protein flightless-1 homolog	Q13045;B4DIX0;Q59H95	FLII	0.12255	0.945635
Microtubule-associated protein 1B;MAP1B heavy chain;MAP1 light chain LC1	A0A024RAM4;P46821;A2BDK6;Q5H9P1	MAP1B;DKFZp686F1345	0.0999204	0.945635
B-cell receptor-associated protein 31	Q53HT6;Q53G72;P51572;C9JSP1;C9JQ75;C9J0M4;C9JMD7	BCAP31	-0.0787871	0.945635
SH3 domain-binding glutamic acid-rich-like protein	V9HW48;O75368;D3DTE6	HEL-S-115;SH3BGRL	0.0626329	0.945635
Transmembrane emp24 domain-containing protein 10	A0A024R6I3;Q53GF9;P49755;B4DZH3	TMED10	0.0439449	0.945635
Ras-related protein Rab-13	Q504R6;P51153;D3DV69;A0A024RB27	RAB13;hCG_1996054;hCG_24991	0.0856919	0.945635
Collagen alpha-1(VI) chain	A0A087X0S5;P12109;Q8TBN2	COL6A1	0.131227	0.946204
CDGSH iron-sulfur domain-containing protein 1	A0A024QZN7;Q9NZ45	C10orf70;CISD1	-0.0440063	0.94722
Vinculin	A0A024QZN4;V9HWK2;P18206;Q5JQ13	VCL;HEL114	0.0610196	0.947343
Zinc finger protein 512	G3XAG1;Q96ME7;B4DES6;B7Z9P6;Q658M0;B4E0X7	ZNF512;DKFZp666L156	0.102561	0.947343
Adenylate cyclase type 5	O95622;B3KWA8;B7Z2C7	ADCY5	0.0733193	0.947428
Heterogeneous nuclear ribonucleoprotein R	O43390;Q0VGD6;B4DMB1;B2R7W4;B4DT28	HNRNPR;HNRPR	0.0421778	0.947428
Centromere protein V	Q7Z7K6	CENPV	0.101375	0.947428
39S ribosomal protein L39, mitochondrial	Q9NYK5	MRPL39	-0.0540403	0.947428
Elongation factor 1-beta	A0A024R3W7;P24534;A4D1M6	EEF1B2;LOC392793	0.0525445	0.947428
Alpha-actinin-1	A0A024R694;P12814;Q86TX4	ACTN1	-0.0695842	0.947428
Dolichyl-diphosphooligosaccharide--protein glycosyltransferase subunit 2	B2RE46;P04844;B4DJL0	RPN2	-0.0514645	0.947428
Prohibitin	Q6PUJ7;A8K401;P35232;Q6FHP5;Q53FV0;C9JW96;C9JZ20;E7ESE2;E9PCW0	HEL-S-54e;PHB	0.0434194	0.947428
Heterogeneous nuclear ribonucleoprotein A1;Heterogeneous nuclear ribonucleoprotein A1, N-terminally processed;Heterogeneous nuclear ribonucleoprotein A1-like 2	F8W6I7;A0A024RB53;A0A024RAZ7;P09651;A0A024RC46;Q6IPF2;Q9BSM5;Q0VAC0;F8VZ49;A0A024QZ98;Q32P51;F8VTQ5;B4DP35;B4E0B5	HNRNPA1;HNRPA1;hCG_2020860;RP11-78J21.1;HNRNPA1L2	-0.0569334	0.947428
Protein-tyrosine-phosphatase;Receptor-type tyrosine-protein phosphatase delta	Q59H90;Q3KPI9;F5GWR7;Q2HXI4;P23468	PTPRD	-0.0888714	0.947428
Catenin alpha-1	P35221;B4E2G8;G3XAM7;B4DU00;B4DKT9;B3KSR8	CTNNA1	0.0468226	0.947428
Proteasome subunit alpha type-5;Proteasome subunit alpha type	A0A109NGN6;P28066;Q5U0A0	PSMA5	0.0455864	0.947428
Creatine kinase S-type, mitochondrial	A0A024RAK5;P17540;B2R8A3;B3KVA7	CKMT2	0.0609275	0.947428
Coiled-coil domain-containing protein 127	Q96BQ5	CCDC127	-0.234981	0.947545
Dihydrolipoyllysine-residue succinyltransferase component of 2-oxoglutarate dehydrogenase complex, mitochondrial	A0A024R6C9;P36957;Q6IBS5;Q86TQ8;Q86TW7	DLST	-0.06321	0.947637
Pyruvate kinase	A0A024R5Z9;H3BTN5;B4DRT3;Q504U3;H3BR70;A0A024R609;H3BQ34	PKM2;PKM	0.0359151	0.948394
Structural maintenance of chromosomes protein 1A;Structural maintenance of chromosomes protein	Q14683;G8JLG1;Q6P2R1;A8K7A6;Q6MZR8;B7Z709	SMC1A;DKFZp686L19178	0.0658698	0.94881
Cleavage and polyadenylation specificity factor subunit 7	F5H669;B4DGF8;Q8N684;F5H6M0;F5H047	CPSF7	0.127392	0.94881
NA	A0A1B0GV45	NA	0.171927	0.949651
Protein quaking	Q96PU8;H0YG47	QKI	-0.0958544	0.949651
Putative peptidyl-tRNA hydrolase PTRHD1	Q6GMV3	PTRHD1	-0.0778365	0.949651
Kinesin-like protein;Kinesin-1 heavy chain	V9HW29;P33176;D3DRX6	HEL-S-61;KIF5B	0.0622359	0.950058
Nicotinamide phosphoribosyltransferase	A0A024R718;P43490;A0A0C4DFS8	PBEF1;NAMPT	-0.0685224	0.950274
NA	B4DPC0;Q9BSL6	LRRFIP1	-0.123293	0.950274
Heat shock 70 kDa protein 1B;Heat shock 70 kDa protein 1A	A8K5I0;A0A0G2JIW1;P0DMV9;P0DMV8;B4DNT8;B4DWK5;Q59EJ3;B4DFN9;B4DI39;B4E1S9;B4E388;B4DVU9;V9GZ37;B3KTT5;B4DNX1;B4E1T6	HEL-S-103;HSPA1B;HSPA1A	0.0546636	0.952307
NADH dehydrogenase [ubiquinone] iron-sulfur protein 6, mitochondrial	Q6IBC4;O75380;D6RBT3	NDUFS6	0.113588	0.952307
V-type proton ATPase subunit a;V-type proton ATPase 116 kDa subunit a isoform 1	Q53X12;Q93050;Q53ET5;Q5CZH6;B7Z641;B7Z2A9;K7EM24;K7EN36	ATP6V0A1;DKFZp686N0561	0.108506	0.952948
Heat shock protein beta-7	Q9UBY9;D3YTC6;Q68DG0;Q7Z3C1;Q8N241;B3KQL3	HSPB7;DKFZp779D0968;DKFZp686A14192	0.044917	0.952948
Retinol-binding protein 1	P09455;A0A0A0MTB9;H0YAK8;A0A0A0MQT0	RBP1	-0.0568652	0.952948
Collagen alpha-3(VI) chain	D9ZGF2;P12111	COL6A3	-0.179616	0.952948
DNA helicase;DNA replication licensing factor MCM3	Q53HJ4;B2R7C5;A0A0S2Z4T1;P25205;A0A0S2Z492;Q8NHX6;B4DUQ9;J3KQ69;B4DS46	MCM3;HCC5	-0.107415	0.952948
Glyceraldehyde-3-phosphate dehydrogenase	V9HVZ4;P04406;Q2TSD0;E7EUT5;Q0QET7	HEL-S-162eP;GAPDH	0.0342368	0.952948
SUN domain-containing protein 2	A0A024R1P7;B4E2A6;Q9UH99;B4DIU6;Q6NT72;A8K129	UNC84B;SUN2	0.1958	0.952948
Inactive hydroxysteroid dehydrogenase-like protein 1	I6L975;Q3SXM5	HSDL1	-0.0371819	0.953252
Keratin, type I cytoskeletal 10	CON__P13645;P13645	KRT10	0.0657215	0.953252
ATP synthase subunit beta;ATP synthase subunit beta, mitochondrial	V9HW31;P06576;Q0QEN7;H0YH81;F8W079	HEL-S-271;ATP5B	-0.0453276	0.953252
Starch-binding domain-containing protein 1	O95210;B3KMK8;B4DK68	STBD1	0.0926347	0.953252
Histone H2B;Histone H2B type 1-C/E/F/G/I;Histone H2B type 1-K;Histone H2B type F-S	B2R4S9;P62807;A0A024RCL8;O60814;P57053;Q0D2M2	HIST1H2BI;HIST1H2BC;HIST1H2BK;H2BFS	0.0451784	0.953252
FUN14 domain-containing protein 2	Q9BWH2	FUNDC2	0.0772529	0.953252
Lanosterol 14-alpha demethylase	B3KRC6;A0A0C4DFL7;Q16850;Q05D40	CYP51A1	-0.0888672	0.953252
26S proteasome non-ATPase regulatory subunit 9	J3KN29;O00233;F5H5V4;F5GX23;F5H169	PSMD9	0.0718862	0.953252
Eukaryotic translation initiation factor 5A;Eukaryotic translation initiation factor 5A-1;Eukaryotic translation initiation factor 5A-1-like	I3L397;I3L504;P63241;Q6IS14	EIF5A;EIF5AL1	-0.0914094	0.953252
ERO1-like protein alpha	Q96HE7	ERO1L	0.0817855	0.953252
60S ribosomal protein L28	H0YKD8;P46779;H0YMF4;H0YLP6;Q59F34	RPL28	-0.0417639	0.953252
Collagen alpha-1(IV) chain;Arresten	A9LSU1;Q59F15;P02462	COL4A1	-0.067105	0.953252
Transforming protein RhoA	A0A024R324;P61586;B4DKN9;Q9BVT0	RHOA;ARHA	0.092863	0.953824
Probable leucine--tRNA ligase, mitochondrial	Q15031;E9PHM2	LARS2	0.0625979	0.953978
Acyl-protein thioesterase 2	A0A140VJC9;O95372;Q5QPQ1;Q5QPQ0;Q5QPQ3;Q5QPQ2	LYPLA2	0.130097	0.953978
Ubiquitin thioesterase OTUB1	F5GYN4;J3KR44;B4DPD5;Q96FW1;F5H6Q1;F5GYJ8;Q659F9	OTUB1;DKFZp564E242	-0.0770629	0.953978
Tryptophan--tRNA ligase, mitochondrial	B7Z6G7;Q9UGM6;B7Z5X7	WARS2	0.0831448	0.953978
Hexokinase;Hexokinase-2	E9PB90;P52789;Q68E10;A8K2U2;Q53QX9	HK2;DKFZp686M1669	0.123223	0.953978
28S ribosomal protein S25, mitochondrial	P82663;E7EPW2	MRPS25	-0.0776204	0.954347
Isocitrate dehydrogenase [NAD] subunit, mitochondrial;Isocitrate dehydrogenase [NAD] subunit beta, mitochondrial	A0A087WZN1;O43837;A0A087X2E5	IDH3B	0.0589167	0.954347
Translocation protein SEC62	F8WF48;A0JLN5;R9WWI7;Q99442;F8WCJ7;Q3KR08;D3DNQ1	SEC62;TLOC1	-0.0748164	0.954347
Splicing factor U2AF 65 kDa subunit	P26368;B5BU25;K7ENG2	U2AF2	-0.106628	0.954347
Collagen alpha-2(VI) chain	P12110	COL6A2	0.0774776	0.954347
Phosphoglucomutase-1	P36871;B4DFP1	PGM1	0.0337508	0.954347
Coiled-coil domain-containing protein 124	A0A024R7M8;Q96CT7;M0R2F5	LOC115098;CCDC124	0.0790445	0.954347
Methylosome protein 50	A0A024R0H7;Q9BQA1;H0Y711	WDR77	0.0528494	0.954556
U6 snRNA-associated Sm-like protein LSm6	P62312	LSM6	0.0906237	0.95503
Deoxyuridine 5-triphosphate nucleotidohydrolase, mitochondrial	P33316;H0YNW5;H0YKC5;H0YKI0;A0A0C4DGL3;H0YMM5;H0YNJ9	DUT	-0.0813862	0.95503
Polymerase I and transcript release factor	Q6NZI2;B4DPZ5;B4DNU9;B3KRY5	PTRF	-0.0526083	0.95503
BAG family molecular chaperone regulator 3	O95817;Q53GY1;C9JFK9	BAG3	0.059844	0.955619
39S ribosomal protein L1, mitochondrial	A0PJ79;Q9BYD6;H0Y8N7	MRPL1	0.0680139	0.955619
NA	Q53H01;A8K0B6;D3DSQ1;B3KUZ6	ASAH1	-0.0369965	0.955619
40S ribosomal protein S27	P42677;Q5T4L4	RPS27	0.0397792	0.955619
60 kDa SS-A/Ro ribonucleoprotein	A0A024R983;P10155;B3KN94	TROVE2	0.104006	0.955619
Prostaglandin E synthase 3	A0A024RB32;A0A087WYT3;B3KUY2;Q15185;B4DDC6	PTGES3	0.0756461	0.955619
Arginyl-tRNA--protein transferase 1	B4E107;B2R7P0;F5GXE4;B4DR48;B4DK25;H0Y5C2;O95260;Q5SQQ1	ATE1	0.0825587	0.95582
High mobility group protein HMGI-C	F5H2U8;F5H2A4;F6LHU9;Q1M183;F5H6H0;P52926;D2WHG0;A5Y0M9	HMGA2	-0.0428525	0.957321
Exportin-2	P55060;B4DM31;B4DUC5;B4DM67;B4DPS6	CSE1L	0.0655828	0.957321
Dihydropyrimidinase-related protein 2	Q59GB4;A0A1C7CYX9;Q16555	DPYSL2	0.0411575	0.958032
Phosphoglycolate phosphatase	A6NDG6	PGP	0.0913126	0.959146
Serine/threonine-protein phosphatase CPPED1	Q9BRF8	CPPED1	-0.0968819	0.961644
Iron-sulfur protein NUBPL	X5D2R5;Q8TB37;X5D995;X5DR74;F8W061;B4DWB0;H0YHR7	NUBPL	0.0557146	0.961644
Electron transfer flavoprotein-ubiquinone oxidoreductase, mitochondrial	Q547S8;Q16134;B4DEQ0;A7UNU5	ETFDH	0.0578798	0.962533
Coronin	J3KSS5;J3QRV4	CORO6	0.103135	0.962533
Glutathione peroxidase;Glutathione peroxidase 1	A0A087WUQ6;Q7L4Q3;P07203;Q6NSD4	GPX1	0.0529618	0.962533
Cytochrome c oxidase subunit 8A, mitochondrial	Q53XN1;U3KQK5;P10176	COX8A	-0.0600335	0.962533
Cytoplasmic dynein 1 intermediate chain 2	A0A140VKE9;Q13409;B4DPZ3;Q59GU5;E7EQL5;E7EV09	DYNC1I2	0.0796521	0.962533
NA	G1UI22;A8MQ02	MLLT4	-0.0719014	0.962533
NA	B7Z4U9;Q59HE3;B2RCJ7;B7Z5T6;A8K8C4;Q15786	NA	-0.0468526	0.962533
ATP-dependent Clp protease proteolytic subunit, mitochondrial;ATP-dependent Clp protease proteolytic subunit	Q16740;M0R208	CLPP	-0.0603702	0.962533
Nucleolar protein 56	O00567;A8K9K6;A0PJ92	NOP56	-0.0495639	0.964135
Glyoxalase domain-containing protein 4	F6TLX2;Q9Y3E8;B4DX01;B7Z403;A8K8F0;Q9HC38;B3KV49;I3L3Q4	GLOD4	0.0533884	0.964135
Polypyrimidine tract-binding protein 1	A0A0U1RRM4;P26599;A6NLN1;A0A0D9SF20	PTBP1	0.112661	0.964135
DCC-interacting protein 13-alpha	Q9UKG1;B4DQX8	APPL1	0.109821	0.964135
Four and a half LIM domains protein 2	Q6I9R8;Q2XQU9;J3KNW4;A0A0A0MSG2;Q14192;Q2TSB7;I0CE67;Q53T40	FHL2;AAG11	-0.0566424	0.964698
Armadillo repeat-containing X-linked protein 1	A0A024RCI6;Q9P291	ARMCX1	-0.173326	0.964796
Protein unc-45 homolog B	Q8IWX7;H0UID2	UNC45B	-0.0535964	0.964796
PRA1 family protein 3	B4DZZ0;B3KQB4;A0A024R371;O75915	ARL6IP5	-0.0425054	0.964796
N-alpha-acetyltransferase 15, NatA auxiliary subunit	A0A0B4J1W3;B2RBE5;Q9BXJ9;B4E2T6;Q58F05	NAA15;NARG1	-0.0810442	0.964796
Unconventional myosin-XVIIIb	Q8IUG5;A0A075B6F5;F5GXR6	MYO18B	-0.122309	0.964796
Protein QIL1	A0A140TA86;Q5XKP0;K7EIR2;A0A140TA84	QIL1;C19orf70	0.126109	0.964796
Succinyl-CoA ligase subunit beta;Succinyl-CoA ligase [ADP-forming] subunit beta, mitochondrial	E5KS60;Q9P2R7;Q6N0B1;Q5T9Q5	SUCLA2;DKFZp686D0880	0.0314289	0.96489
Phosphate carrier protein, mitochondrial	Q8NCF7;B2RE88;A0A024RBE8;A0A024RBH9;Q00325;F8VVM2;Q53HC3	SLC25A3	0.0354916	0.96489
Elongation factor 2	P13639;Q8TA90;B4DPU3;Q6PK56	EEF2	0.0351072	0.96489
60S ribosomal protein L7	P18124;A0A024R814;A8MUD9	RPL7	0.0273333	0.96489
Histone H4	B2R4R0;P62805;Q0VAS5	HIST1H4H;HIST1H4A	-0.0487314	0.96489
Nitrilase homolog 1	B7Z410;Q86X76;B2R8D1	NIT1	0.049058	0.96489
Agrin;Agrin N-terminal 110 kDa subunit;Agrin C-terminal 110 kDa subunit;Agrin C-terminal 90 kDa fragment;Agrin C-terminal 22 kDa fragment	A0A087X208;O00468	AGRN	-0.0533007	0.96489
ATP synthase F(0) complex subunit B1, mitochondrial	Q5QNZ2;Q08ET0;A8K4W2;P24539;Q53GB3	ATP5F1;hCG_39985	0.030941	0.96489
NADH dehydrogenase [ubiquinone] flavoprotein 2, mitochondrial	Q6IPW4;Q6IB76;A8K750;E7EPT4;P19404;Q9UEH5	NDUFV2	0.0765592	0.96489
5-AMP-activated protein kinase catalytic subunit alpha-2	P54646;B2RA25;A0MZF5;A0A087WXX9	PRKAA2	-0.0821731	0.96489
Heat shock protein beta-3	Q6ICS9;Q12988	HSPB3	0.0345347	0.96489
NA	B2R642	NA	-0.0715099	0.96489
Striated muscle preferentially expressed protein kinase	Q15772	SPEG	0.110505	0.96489
Serum albumin	CON__P02768-1;P02768;A0A0C4DGB6;Q56G89;B2RBS8;B4DPP6;A8K9P0;B4DPR2;B7WNR0;H0YA55;C9JKR2;A0A087WWT3	ALB	0.0657642	0.96489
14-3-3 protein beta/alpha;14-3-3 protein beta/alpha, N-terminally processed	V9HWD6;P31946;B5BU24	HEL-S-1;YWHAB	0.0588385	0.96489
3-mercaptopyruvate sulfurtransferase;Sulfurtransferase	A0A140VJX3;P25325;Q2VEU1;B1AH49;Q59HD5	MPST	0.0512538	0.96489
SWI/SNF complex subunit SMARCC2	Q59G16;F8VXC8;A0A024RB22;Q8TAQ2;B4DF22	SMARCC2	0.0698856	0.96489
MICOS complex subunit MIC60	Q16891;B9A067;B4DQY2;B4DKR1;B4DT20	IMMT	0.0334672	0.96489
TOM1-like protein 2	Q6ZVM7;B7Z8F0;B7Z2U2	TOM1L2	0.0856891	0.96489
NA	A0A024R152;A0A024R167;C9JVY5	hCG_28765;AKAP2	0.0534098	0.96489
Sideroflexin;Sideroflexin-3	A0A0A0MS41;B4DRS6;Q9BWM7;S4R3N9	SFXN3	-0.0745441	0.96489
Peptidyl-prolyl cis-trans isomerase FKBP1A;Peptidyl-prolyl cis-trans isomerase	P62942;Q5W0X3;A0A087WZM5;Q0VDC6	FKBP1A	-0.069122	0.96489
Coatomer subunit beta	P53618;E9PP73	COPB1	0.0583851	0.96489
28S ribosomal protein S28, mitochondrial	A0A0S2Z5D2;A0A0S2Z563;A0A0S2Z5H0;Q9Y2Q9;H0YAT2;H7C5V3;Q53G62;E5RGC7;E5RFH3	MRPS28	0.041426	0.96489
Monofunctional C1-tetrahydrofolate synthase, mitochondrial	A0A087WVM4;B7ZM99;Q6UB35;B2RD24	MTHFD1L	-0.0564977	0.96489
Serine/threonine-protein kinase PAK 2;PAK-2p27;PAK-2p34;Non-specific serine/threonine protein kinase	Q13177;A8K5M4	PAK2	0.0784131	0.96489
28S ribosomal protein S29, mitochondrial	P51398;V9GYL9;V9GYJ9;V9GZ03;V9GYW1;V9GYA7	DAP3	0.077096	0.96489
Heterogeneous nuclear ribonucleoproteins A2/B1	P22626;A0A087WUI2;A0A024RA28;I6L957	HNRNPA2B1;HNRPA2B1	0.0450379	0.96489
ATP synthase subunit delta, mitochondrial	P30049	ATP5D	-0.0317942	0.96489
Voltage-dependent calcium channel subunit alpha-2/delta-1;Voltage-dependent calcium channel subunit alpha-2-1;Voltage-dependent calcium channel subunit delta-1	P54289;Q9UIU0;Q9UDQ3	CACNA2D1;WUGSC:H_DJ0560O14.1	-0.0399052	0.96489
NA	Q6MZV7;Q6PYX1	DKFZp686C11235	0.0621101	0.96489
NA	A0A1B0GWJ6	NA	-0.0547618	0.96489
14-3-3 protein epsilon	V9HW98;P62258;G9K389;G9K388;B4DJB0;B4DJF2;I3L3T1	HEL2;YWHAE;YWHAE/FAM22B fusion;YWHAE/FAM22A fusion	0.0258641	0.96489
SURP and G-patch domain-containing protein 2	A8K5G0;A0A024R7K0;M0R2Z9;Q8IX01;M0R3F6	SFRS14;SUGP2	-0.076389	0.96489
Tripeptidyl-peptidase 2	Q5VZU9;P29144;B7Z920	TPP2	0.0778982	0.96489
tRNA-splicing ligase RtcB homolog	Q9Y3I0	RTCB	0.0369695	0.96489
Proteasome-associated protein ECM29 homolog	Q5VYK3;J3KN16;B3KXF2	ECM29;KIAA0368	0.138089	0.96489
RNA-binding protein with multiple splicing	D3DSV0;B4E3T4;Q93062;Q569H2;H0YBU9	hCG_2043421;RBPMS	-0.0705925	0.96489
Cytosolic non-specific dipeptidase	B4DV28;Q96KP4;A0A024R382;B4DPF1	CNDP2	0.0340696	0.965518
14-3-3 protein eta	A0A024R1K7;Q04917;Q9H4N8;A2IDB2	YWHAH	0.0652404	0.965518
Serine/arginine-rich splicing factor 10	Q5JRI1;Q53GD7;A0A0S2Z504;O75494	SRSF10	-0.0531033	0.965518
ATP-dependent 6-phosphofructokinase, platelet type	Q01813;Q8WTZ9	PFKP	0.0313637	0.965518
Anoctamin-6;Anoctamin	Q4KMQ2;B4DZA5;B4E1V1;B3KX12	ANO6	-0.0581626	0.965613
Cytochrome c oxidase subunit 6B1	P14854	COX6B1	-0.095188	0.965847
60S ribosomal protein L13a	Q5QTS3;P40429;Q9BSQ6;Q53H34;M0QYS1;Q8J015;Q0VGL3	RPL13A;RPL13a	-0.0389673	0.966293
Delta-aminolevulinic acid dehydratase	B7Z3I9;A0A140VJL9;A0A024R877;Q6ZMU0;P13716;B7ZBK6	ALAD	-0.0469236	0.966293
Ras-related protein R-Ras2	P62070;E9PK85	RRAS2	-0.0375854	0.966293
Alpha-1-syntrophin	Q13424;B3KTR0	SNTA1	-0.0581489	0.966293
Cytochrome b5	P00167	CYB5A	0.129062	0.966293
NA	Q6MZS5	DKFZp686A13234	-0.0425666	0.966293
Phospholipase A-2-activating protein	Q9Y263;E5RIM3	PLAA	0.104749	0.966293
Stomatin-like protein 2, mitochondrial	Q9UJZ1;A0A087WYB4;Q6ZNW0	STOML2	0.0361423	0.966293
26S proteasome non-ATPase regulatory subunit 5	A8K4T6;Q16401	PSMD5	0.0342826	0.966293
Glycogen phosphorylase, brain form;Alpha-1,4 glucan phosphorylase	P11216;Q59GM9;B4DSD8	PYGB	0.0244831	0.966293
Aspartate aminotransferase, cytoplasmic;Aspartate aminotransferase	A0A140VK69;P17174;Q2TU84;B7Z1I2	GOT1;GIG18	0.0420925	0.966293
3-ketoacyl-CoA thiolase, mitochondrial	B2RB23;P42765;A0A0B4J2A4;B3KNP8;K7EME0	ACAA2	0.0472366	0.966293
Plexin-A3	P51805	PLXNA3	0.0885665	0.966357
NA	CON__P02663	NA	0.231679	0.967309
NA	A0A0D9SF54	SPTAN1	-0.0296533	0.967309
Integrin alpha-7;Integrin alpha-7 heavy chain;Integrin alpha-7 light chain;Integrin alpha-7 70 kDa form	J3KNV4;Q4LE35;Q13683;B3KMS6	ITGA7;ITGA7 variant protein	-0.0554902	0.967309
Cytochrome c1, heme protein, mitochondrial	Q8TBT6;P08574	CYC1	0.0436893	0.967583
Ig kappa chain C region	Q0KKI6;Q8TCD0;Q5EFE6;Q7Z3Y4;Q6GMX0;P01834;A0A075B6H6	IGKC	0.167951	0.967996
Echinoderm microtubule-associated protein-like 1	F8W717;B7Z650;B3KXA3;O00423	EML1	-0.0435998	0.967996
39S ribosomal protein L55, mitochondrial	A0A024R3R0;Q7Z7F7;X6R631	MRPL55	-0.0470499	0.967996
Blood vessel epicardial substance	Q8NE79	BVES	-0.052558	0.967996
39S ribosomal protein L24, mitochondrial	Q96A35	MRPL24	-0.0401342	0.967996
Ubiquitin-like modifier-activating enzyme 1	A0A024R1A3;P22314;B4DDE4;B4DL67	UBE1;UBA1	0.0298906	0.967996
Phosphoglucomutase-like protein 5	Q15124	PGM5	-0.0360476	0.967996
Ubiquinone biosynthesis protein COQ9, mitochondrial	A0A024R6U3;O75208;B4DIV2;H3BNT2;H3BPY0;H3BSJ5	hCG_2025883;COQ9	0.0697635	0.968937
Microfibrillar-associated protein 5	B3KW70;F5GYX4;H0YG03;A8K3H0;Q13361;H0YGS3	MFAP5	0.162777	0.968937
Erythrocyte band 7 integral membrane protein	A0A024R882;P27105;B4E2V5;B4DZK8	STOM	-0.0423897	0.969122
40S ribosomal protein S2	P15880;Q3KQT6;Q8N5L9;Q6IPX5;H0YEN5;Q8J014;E9PQD7;E9PMM9;I3L404;E9PPT0;Q8NI61;E9PM36	RPS2;rps2;OK/KNS-cl.7	-0.0318746	0.970072
L-lactate dehydrogenase;L-lactate dehydrogenase A chain	V9HWB9;P00338;B4DJI1;F5GYU2;F5GXY2	HEL-S-133P;LDHA	-0.0321921	0.970072
Myosin-14	Q7Z406	MYH14	-0.0360338	0.970284
T-complex protein 1 subunit theta	P50990;Q53HU0;Q7Z759	CCT8	0.0302797	0.970634
NA	CON__P02662	NA	-0.141535	0.970634
THO complex subunit 2	Q8NI27;A0A0C4DG98	THOC2	0.0344175	0.970933
Double-stranded RNA-binding protein Staufen homolog 1	A0A087X1A5;Q5JW30;A8K622;Q59F99;O95793;B3KRE0	STAU1	-0.0529321	0.970933
Annexin;Annexin A7	B2R657;B4DT77;B4DWU2;B4DHY4;Q53HM8;P20073;B2R7L2	ANXA7	0.0376914	0.970933
Alpha-enolase;Enolase	A0A024R4F1;P06733;E2DRY6	ENO1	-0.0222387	0.970933
Septin-11	D6RGI3;D6RER5;Q9NVA2;D6RDU5;H0Y961	43354	0.0365563	0.970933
Fascin	B3KTA3;Q16658	FSCN1	0.0492021	0.970933
Rho-associated protein kinase;Rho-associated protein kinase 1	D9ZGF8;Q13464;A0A0U1RQV4	ROCK1	0.111067	0.970933
Tubulin gamma-1 chain;Tubulin gamma-2 chain;Tubulin gamma chain	P23258;A0A1B4Z394;Q9NRH3;K7EIS0	TUBG1;TUBG2	0.045343	0.970933
Protein SCO2 homolog, mitochondrial	O43819	SCO2	0.0325106	0.970933
Sister chromatid cohesion protein PDS5 homolog B	Q9NTI5;B7Z5S1	PDS5B	0.0440052	0.970933
Rab GTPase-binding effector protein 1	Q15276;B4DMM4;Q05BX6	RABEP1	-0.0415958	0.970933
Peroxiredoxin-2	V9HW12;P32119;B4DF70;A6NIW5	HEL-S-2a;PRDX2	-0.0249701	0.970933
Lactadherin;Lactadherin short form;Medin	B3KTQ2;A0A024RC55;Q08431;A0A024RC59;F5GZN3;B4E396	MFGE8	0.0323732	0.970933
Serine/threonine-protein phosphatase 2A 55 kDa regulatory subunit B;Serine/threonine-protein phosphatase 2A 55 kDa regulatory subunit B alpha isoform	Q56VW8;A0A140VJT0;P63151	PPP2R2A	-0.0605448	0.970933
UPF0160 protein MYG1, mitochondrial	F8VR84;Q8WYI2;Q86UA3;Q9HB07;F8VQQ3;Q96CT6	C12orf10;MST024	0.123149	0.970933
SNW domain-containing protein 1	Q13573;Q6I9S2;B7Z9X2;B4DY36;A0A024R6E3;G3V3A4;B4DEG7;G3V4X8;Q9ULA6;Q6P151	SNW1	0.0448485	0.970933
60S ribosomal protein L11	Q5VVD0;P62913;Q08ES8;Q5VVC8;Q5VVC9	RPL11	0.0741109	0.970933
Dystroglycan;Alpha-dystroglycan;Beta-dystroglycan	A0A024R2W4;Q14118	DAG1	-0.0312804	0.970933
Serine hydroxymethyltransferase;Serine hydroxymethyltransferase, mitochondrial	V9HW06;Q53ET4;P34897;A0A024RB99;Q5HYG8;B4DW25;B4E1G2;B4DJQ3;B4DP88;Q5BJF5;B4DJ63;B4DWA7;B4DLV4;H0YIZ0	HEL-S-51e;SHMT2;DKFZp686P09201	0.0246347	0.970933
Early endosome antigen 1	Q15075;A8K7J3	EEA1	0.0439969	0.972505
NA	Q59FT7	NA	-0.0509946	0.973031
NADH-ubiquinone oxidoreductase chain 4	A0A075X8B5;H9E785;A0A059QSR8;A0A141ZSL4;A0A141ZQA8;Q1ZY32;X5CDJ3;X5BLB3;V9N9T2;V9N9H0;V9N518;V9JFH6;V9J5G3;V9J548;V9J0Z6;V9IZQ9;V5JGF7;U5ZDA5;U5YXJ5;U5YT86;U3LDR4;U3LCU1;U3L9L1;U3L8Y8;U3L8P3;U3L6U8;U3L6N6;U3L6H7;T2HMQ7;T1Q5B1;T1Q517;S5RPJ8;S5RLC1;S4UQT8;R9Y4Q4;R9Y4D9;R9Y457;R9Y323;R9Y2B9;R9Y0J8;Q9T9Y1;Q9B2Y7;Q9B2Y5;Q9B2X8;Q9B2X6;Q9B2W5;Q9B2W2;Q9B1S7;Q9B188;Q9B0T8;Q8WCZ0;Q8WCY0;Q8W8T1;Q8HNR0;Q8HG2…	ND4;ndh4;NADH4;MT-ND4	0.0289954	0.973327
Mitochondrial fission factor	A0A024R491;Q9GZY8	C2orf33;MFF	-0.0819343	0.973327
Inosine-5-monophosphate dehydrogenase 2	H0Y4R1;P12268;B7Z1G4;Q6QE17	IMPDH2	0.042174	0.973327
Glutamate dehydrogenase;Glutamate dehydrogenase 1, mitochondrial;Glutamate dehydrogenase 2, mitochondrial	B4DMF5;E9KL48;P00367;B4E0N9;Q53GW3;B4DMG8;B3KT18;A0A140VK14;P49448	GLUD1;GLUD2	0.0265341	0.973327
GTP-binding protein 1	A0A024R1S5;O00178;B2RDW9	GTPBP1	-0.0474117	0.973327
Transketolase	B4E022;V9HWD9;Q53EM5;P29401;A0A0B4J1R6;B3KSI4;A0A0K0K1H9;B3KPZ8;B4DVU1	HEL107;TKT	0.0380341	0.973327
Optic atrophy 3 protein	Q9H6K4;B4DK77	OPA3	-0.0222491	0.973327
Stathmin	P16949;B5BU83;A2A2D0;Q96CE4;A0A140VJW2	STMN1	0.0382529	0.973327
Cytochrome c	C9JFR7;G4XXL9;P99999	CYCS	0.0371197	0.973327
Beta-taxilin	Q5HYH7;B2RBM1;Q8N3L3;Q5HYK6;H0UI60;H0UI61	DKFZp451B226;TXLNB;DKFZp451H216	-0.0822688	0.973327
Nexilin	Q0ZGT2;D3DQ79;H7BXY5;B4DDI0	NEXN	0.0331065	0.973327
MICOS complex subunit MIC27	A0A087WUX8;A0A087WYF7;Q6UXV4;Q68DW4	APOOL;DKFZp779P1227	-0.0541356	0.973327
NADH-cytochrome b5 reductase;NADH-cytochrome b5 reductase 3;NADH-cytochrome b5 reductase 3 membrane-bound form;NADH-cytochrome b5 reductase 3 soluble form	A0A024R4X0;P00387;Q6ZVI6	CYB5R3	-0.03411	0.973327
Beta-2-microglobulin;Ig lambda-3 chain C regions;Ig lambda-2 chain C regions	Q8N355;Q8N5F4;Q6GMV8;Q6GMW3;Q6PJG0;A2NUT2;Q6PIQ7;Q6IPQ0;Q6GMX4;Q8TCJ5;A0A075B6L0;A0A075B6K9;Q6PJR7;S6C4S2;Q6NS95;Q7Z2U7;Q6IN99;Q567P1;A0A5E4;Q6GMX3;P0CG06;P0CG05	IGL@;DKFZp667J0810;IGLC3;IGLC2	0.166084	0.973327
Guanine nucleotide-binding protein G(s) subunit alpha isoforms short;Guanine nucleotide-binding protein G(s) subunit alpha isoforms XLas	A0A0S2Z3H8;P63092;Q5JWF2;B0AZR9;A0A0S2Z3S5;Q14455;Q5FWY2;S4R3E3	GNAS;GSA	0.0443746	0.973327
Translocon-associated protein subunit gamma	C9JA28;Q9UNL2	SSR3	-0.0586616	0.973327
U2 small nuclear ribonucleoprotein B	P08579;B5BTZ8	SNRPB2	-0.0315294	0.973327
Serine/threonine-protein phosphatase;Serine/threonine-protein phosphatase PP1-beta catalytic subunit	V9HW04;P62140;B7ZB67;B4DJ75;E7ETD8	HEL-S-80p;PPP1CB	-0.0318415	0.973327
Acyl-coenzyme A oxidase;Peroxisomal acyl-coenzyme A oxidase 3	B2R856;O15254	ACOX3	-0.0319362	0.973327
5-3 exoribonuclease 2	B4DZC3;B3KMC9;Q9H0D6;B4E0B9	XRN2	-0.0353761	0.973327
Golgin subfamily B member 1	Q14789;E7EU81	GOLGB1	-0.0698967	0.973327
60S ribosomal protein L36a-like	B2R4V2;Q969Q0	RPL36AL	-0.0678948	0.973327
OCIA domain-containing protein 1	A0A024R9U3;Q9NX40;D6RG39;D6RIT9;D6RDK6;D6RBN5	OCIAD1	-0.048349	0.973327
DnaJ homolog subfamily C member 3	A8KA82;Q13217;X6R9L0	DNAJC3	-0.0644197	0.973327
Ras-related protein Ral-A	P11233;H7C3P7	RALA	-0.0543413	0.973327
Neutral alpha-glucosidase AB	V9HWJ0;B4DJ30;Q14697	HEL-S-164nA;GANAB	0.0279075	0.973327
Actin-related protein 2/3 complex subunit 5;Actin-related protein 2/3 complex subunit 5-like protein	B3KPC7;A0A024R897;Q9BPX5	ARPC5L	0.0348698	0.973773
Tubulin beta-6 chain	Q9BUF5;B4DP54;K7ESM5;B3KS31;B4E386	TUBB6	0.0329178	0.973773
Guanine nucleotide-binding protein G(I)/G(S)/G(O) subunit gamma-12;Guanine nucleotide-binding protein subunit gamma	Q9UBI6;Q53GD1	GNG12	0.056249	0.973988
Proteasome subunit alpha type;Proteasome subunit alpha type-3	Q6IB71;A0A140VK43;P25788	PSMA3	-0.0307509	0.974429
Methyl-CpG-binding protein 2	A0A140VKC4;E9LUH3;D3YJ43;D0UU70;E9LUH4;P51608;E1B2J3;C6KG45;D9ZNA4;D5L9I5;A8K079;D6QZ43;A0A087X1U4;C6KG44;I6LM39;A0A075BPP5;A0A0S2Z401	MECP2	0.0370398	0.975696
[Pyruvate dehydrogenase (acetyl-transferring)] kinase isozyme 2, mitochondrial	Q15119;B4DLP2;D6RDN9	PDK2	-0.0490234	0.976441
Dihydrolipoyl dehydrogenase;Dihydrolipoyl dehydrogenase, mitochondrial	B4DFL1;A0A024R713;P09622;E9PEX6;B4DMK9	DLD	-0.0269393	0.976441
Protein TBRG4	D3DVL7;B4DU42;Q969Z0;B3KRS4;B3KMT3;B3KM73;C9J7P5;C9IZN7	TBRG4	-0.0483119	0.976441
Sorting and assembly machinery component 50 homolog	Q9Y512	SAMM50	-0.0248029	0.977537
V-type proton ATPase subunit B, brain isoform	A0A140VK65;P21281;Q59HF3;H0YC04	ATP6V1B2	0.0449136	0.977825
SH3 domain-binding glutamic acid-rich protein	Q53Y47;P55822;H7C2G0	SH3BGR	0.0542724	0.977825
Isocitrate dehydrogenase [NAD] subunit gamma, mitochondrial;Isocitrate dehydrogenase [NAD] subunit, mitochondrial	P51553;D3DWV9;E9PF84;G5E9Q7;E7EQB8;O15384	IDH3G;hCG_2004980	-0.0372152	0.977825
A-kinase anchor protein SPHKAP	Q2M3C7	SPHKAP	-0.0504297	0.977825
Cytoskeleton-associated protein 4	A0A024RBH2;Q07065;B3KVX6;Q8TB01;Q6NWZ1	CKAP4	0.0255905	0.978992
40S ribosomal protein S5;40S ribosomal protein S5, N-terminally processed	M0R0F0;A0A024R4Q8;P46782;Q53G25;M0R0R2;M0QZN2	RPS5	0.0193763	0.978992
Isocitrate dehydrogenase [NADP];Isocitrate dehydrogenase [NADP] cytoplasmic	V9HWJ2;O75874;Q0QER2;V9HW78;Q6FIA4;B2R5M8;Q6FI37	HEL-S-26;IDH1;HEL-216	-0.0211452	0.978992
Guanine nucleotide-binding protein subunit alpha-11	Q59FM5;P29992;K7EL62	GNA11	0.0484746	0.978992
40S ribosomal protein S30	E9PR30;P62861	FAU	-0.0409415	0.978992
NA	A6N933;A6N931	MYH7	0.0423726	0.978992
Protein FAM162A	Q96A26;F8W7Q4;E9PH05;B4DF97	FAM162A	-0.0476927	0.978992
Small nuclear ribonucleoprotein-associated protein;Small nuclear ribonucleoprotein-associated protein N;Small nuclear ribonucleoprotein-associated proteins B and B	J3QLE5;Q66K91;Q5XPV6;B4DVS0;X5DP00;Q15182;P63162;P14678;Q53HE7;Q9UIS4;J3KRY3;S4R3P3;Q6LBS1	SNRPN;SNRPB	-0.037225	0.978992
40S ribosomal protein S3a	Q6NXR8;A8K4W0;P61247;D6RG13;D6RAT0;B7Z3M5;D6RB09;E9PFI5;H0Y9Y4;H0Y8L7;D6R9B6;D6RAS7	RPS3A	0.0269256	0.978992
NADH dehydrogenase [ubiquinone] 1 alpha subcomplex subunit 11	Q86Y39;K7EQ77;K7EK78;K7EP35;K7EMT4	NDUFA11	0.0300442	0.978992
NA	A0A0J9YYJ7;A0A0J9YW50;A0A0J9YY01	NA	-0.0248241	0.979412
Cytochrome c oxidase assembly factor 3 homolog, mitochondrial	A0A024R1X4;Q9Y2R0;K7EPV0	hCG_16955;COA3	0.0335257	0.979577
Phosphatidylinositol-binding clathrin assembly protein	B5BU72;A0A024R5L7;A8K5U9;A0A024R5P1;Q13492;E9PI56;E9PKP6;E9PLJ8	PICALM	0.0757052	0.979761
rRNA 2-O-methyltransferase fibrillarin	Q96BS4;P22087;M0R299;M0QXL5;M0R2Q4;B4DLD4;M0R0P1	FBL	-0.0316052	0.979761
Protein disulfide-isomerase A4	A0A090N8Y2;P13667	ERP70;PDIA4	0.0544666	0.980489
Integrin-linked protein kinase	V9HWF0;A0A0A0MTH3;Q13418	HEL-S-28;ILK	0.0221834	0.980489
Ferritin;Ferritin heavy chain;Ferritin heavy chain, N-terminally processed	Q6NZ44;B3KXC3;A0A024R525;P02794;Q6NS36;G3V192;G3V1D1;E9PRK8;E9PKY7;Q8TD27	FTH1	0.057127	0.980489
Dolichyl-diphosphooligosaccharide--protein glycosyltransferase subunit STT3A	A0A024R3J7;P46977	hCG_2032701;STT3A	0.0489393	0.980489
Serine/arginine-rich splicing factor 7	A0A0B4J1Z1;B4DEK2;C9JAB2;Q16629;Q8NB80	SRSF7	-0.0477323	0.980489
Matrix metalloproteinase-15	A0A024R6U8;P51511;Q7KZY0	MMP15	0.0613874	0.980489
Cation-independent mannose-6-phosphate receptor	P11717;Q59EZ3	IGF2R	0.0432302	0.980762
Peptidyl-prolyl cis-trans isomerase NIMA-interacting 1	Q13526;K7EN45;K7EMU7;B3KUM4	PIN1	-0.0301675	0.980762
Collagen alpha-1(II) chain;Collagen alpha-1(II) chain;Chondrocalcin	P02458	COL2A1	-0.0318629	0.980762
Mitochondrial ribonuclease P protein 1	Q7L0Y3;C9JVB6	TRMT10C	0.0355444	0.980773
Cytoplasmic dynein 1 light intermediate chain 1	Q9Y6G9;B3KM42;E9PHI6;B4DDM4;Q6MZE7	DYNC1LI1;DKFZp686A1525	0.0431335	0.980773
FERM, RhoGEF and pleckstrin domain-containing protein 1	C9JME2;Q9Y4F1	FARP1	0.0379675	0.980773
T-complex protein 1 subunit epsilon	V9HW37;P48643;B4DZT5;E7ENZ3;Q9BU08;B7ZAR1;B4DDU6;B4DXI1;E9PCA1;B4DE30;B4DYC8;B4DX08;Q96GI1	HEL-S-69;CCT5	0.0229296	0.980773
Xaa-Pro dipeptidase	J3K000;A0A140VJR2;P12955	PEPD	-0.020845	0.980773
2-amino-3-ketobutyrate coenzyme A ligase, mitochondrial	O75600;A8K228	GCAT	-0.0337277	0.98134
Importin subunit alpha-3	O00629	KPNA4	0.0376081	0.98134
Transcriptional coactivator YAP1	P46937;A0A024R3E4;Q86T74;H0YCI3;B4E2Y3	YAP1;DKFZp451O0517	-0.0339761	0.98134
Cytosol aminopeptidase	V9HW38;P28838;B4DQG5;H0Y9Q1	HEL-S-106;LAP3	0.0337922	0.98134
ADP/ATP translocase 2;ADP/ATP translocase 2, N-terminally processed	P05141;Q6NVC0	SLC25A5	0.0142814	0.981435
Ras-related protein Rab-11B;Ras-related protein Rab-11A	Q15907;H3BMH2;H3BSC1;A0A024R5Z8;P62491;B4DMN1	RAB11B;RAB11A	-0.0200469	0.982328
ATP-dependent RNA helicase DDX19A	I3L0H8;B4DS24;Q9NUU7	DDX19A	0.0380122	0.982328
Protein transport protein Sec31A	A0A024RDD3;D6REX3;O94979;A0A024RDH6;D6RHZ5;H7BXG7	SEC31L1;SEC31A	-0.032819	0.982328
Trans-2-enoyl-CoA reductase, mitochondrial	Q9BV79;B4DV18;H3BM30	MECR	-0.0288413	0.982328
Tropomyosin alpha-3 chain	P06753;Q8NAH0	TPM3;HEL-S-82p	-0.0452185	0.982328
NA	H0YJ34;A0A0U1RRM8	FERMT2	0.0242753	0.983629
[truncated: 165 more rows]
