# Supplementary material for: Proteomic mapping of atrial and ventricular heart tissue in patients with aortic valve stenosis
Source: Sci Rep. 2021 Dec 22;11:24389. doi: 10.1038/s41598-021-03907-3 (PMC8695579; doi:10.1038/s41598-021-03907-3)
Supplement: Supplementary file 10 — Supplementary Table 7. [file 41598_2021_3907_MOESM10_ESM.xlsx]

## Sheet: Legend
Supplementary Table 7 - Univariate data analysis of differential protein expression between ischemic and non-ischemic ventricle samples

## Sheet: Differential Protein Expression
ProteinName	ProtID	Gene name	logFC (ventricle ischemic / (ventricle non-ischemic)	adj.P.Val
Haptoglobin;Haptoglobin alpha chain;Haptoglobin beta chain	P00738;A0A0C4DGL8;J3QLC9;J3QR68;H0Y300;Q6NSB4;A0A087WU08;Q6PEJ8;B3KP77;H3BS21	HP	-1.46538	0.999915
Scaffold attachment factor B1	B7Z2Z1;B7ZLP5;A8K329;Q15424;B7Z1C7;B7Z2F6;B7Z5X3;B7Z959	SAFB	0.648858	0.999915
Protein S100-A1;Protein S100	A0A0S2Z4H2;P23297;Q5T7Y5;Q5T7Y4;Q5T7Y6	S100A1	2.57862	0.999915
Fibrinogen alpha chain;Fibrinopeptide A;Fibrinogen alpha chain	P02671;A0A0S2Z3E8	FGA	-1.25294	0.999915
Pre-B-cell leukemia transcription factor-interacting protein 1	B4DV94;B4E1J0;B4E0K4;Q96AQ6	PBXIP1	0.85528	0.999915
Serine/threonine-protein phosphatase;Serine/threonine-protein phosphatase PP1-gamma catalytic subunit	Q9UPN1;F8VYE8;A0A024RBP2;P36873;F8VR82;F8W0W8;A0A087WYY5	PPP1CC	0.783615	0.999915
Arginase;Arginase-2, mitochondrial	A0A024R6A0;P78540	ARG2	-0.687996	0.999915
Poly(rC)-binding protein 1	Q53SS8;Q15365	PCBP1	0.359754	0.999915
Lon protease homolog, mitochondrial;Lon protease homolog	K7EJE8;K7EKE6;B3KU28;Q2VPA0;B3KXS5;E5KMI6;P36776;B4DPX0	LONP1	-0.423398	0.999915
Golgi integral membrane protein 4	O00461;F8W785	GOLIM4	1.20915	0.999915
Complement C3;Complement C3 beta chain;C3-beta-c;Complement C3 alpha chain;C3a anaphylatoxin;Acylation stimulating protein;Complement C3b alpha chain;Complement C3c alpha chain fragment 1;Complement C3dg fragment;Complement C3g fragment;Complement C3d fragment;Complement C3f fragment;Complement C3c alpha chain fragment 2	V9HWA9;P01024;B4E216	HEL-S-62p;C3	-1.00049	0.999915
Endophilin-B1	A0A140VJU5;A0A087WW40;Q9Y371	SH3GLB1	-0.452398	0.999915
Vesicle-associated membrane protein-associated protein B/C	Q53XM7;O95292	VAPB	-0.46172	0.999915
Src substrate cortactin	A0A024R5M3;Q14247;Q53HG7;Q76MU0	CTTN;EMS1	0.694441	0.999915
Peptidyl-glycine alpha-amidating monooxygenase;Peptidylglycine alpha-hydroxylating monooxygenase;Peptidyl-alpha-hydroxyglycine alpha-amidating lyase	P19021;B4DKE0;H7BYD9	PAM	0.67759	0.999915
Integrin-linked protein kinase	V9HWF0;A0A0A0MTH3;Q13418	HEL-S-28;ILK	-0.365886	0.999915
Disco-interacting protein 2 homolog B	Q9P265;Q96IB4	DIP2B	0.60256	0.999915
Cytochrome c oxidase subunit 7A2, mitochondrial	Q496I0;D6RIE3;D6RGV5;H0UI06;P14406	COX7A2	0.30484	0.999915
Neuron navigator 1	Q8NEY1	NAV1	0.572455	0.999915
THO complex subunit 4	Q86V81;E9PB61	ALYREF	-0.483193	0.999915
Hydroxysteroid dehydrogenase-like protein 2	Q6YN16;B2R923;A0A024R159;B4E136	HSDL2	-0.348626	0.999915
Hydroxyacyl-coenzyme A dehydrogenase, mitochondrial	A0A140VK76;A0A0A0MSE2;Q16836;E9PF18	HADH	-0.434621	0.999915
[Pyruvate dehydrogenase (acetyl-transferring)] kinase isozyme 3, mitochondrial	Q15120	PDK3	-0.919098	0.999915
Keratin, type I cytoskeletal 9	CON__P35527;P35527;K7EQQ3	KRT9	0.49163	0.999915
Heme-binding protein 1	A0A024RAS8;Q9NRV9;F5GWX2	HEBP1	0.392562	0.999915
NADH dehydrogenase [ubiquinone] flavoprotein 1, mitochondrial	G3V0I5;E5KNH5;P49821;Q53G70;Q96ID4;B4DE93;B4DUN7	NDUFV1	-0.436627	0.999915
CUGBP Elav-like family member 2	E9PC62;A0A0J9YXJ0;B4DT00;B4DDE7;Q5VZZ6;B2RA86;B4DS31;A0A0J9YX66;A0A1B0GU44;A0A1B0GUN8;O95319;V9GYD9;B4DSZ2	CELF2	1.01104	0.999915
Talin-1	Q9Y490	TLN1	-0.302937	0.999915
40S ribosomal protein S11	P62280;M0QZC5	RPS11	-0.291378	0.999915
Serine/threonine-protein phosphatase;Serine/threonine-protein phosphatase 5	Q9BPW0;H0YDU8;Q53FR0;A0A024R0Q7;P53041;B4DLP6;B2R6R6;A8MU39;B4DDZ8	PPP5C	-0.366908	0.999915
Dual specificity protein phosphatase 3	B5BUI8;P51452	DUSP3	0.285926	0.999915
Histone H2A.V;Histone H2A.Z;Histone H2A	Q71UI9;P0C0S5;C9J0D1;C9J386	H2AFV;H2AFZ	-0.247654	0.999915
5-nucleotidase domain-containing protein 2	Q9H857	NT5DC2	0.470761	0.999915
Ran GTPase-activating protein 1	A0A024R1U0;P46060;B4DY16;B4E0U0	RANGAP1	-0.482582	0.999915
Nuclear protein localization protein 4 homolog	A0A024R8R4;Q8TAT6;B4DG89	NPLOC4	0.641317	0.999915
Annexin;Annexin A2;Putative annexin A2-like protein	V9HW65;A0A024R5Z7;P07355;H0YN42;H0YMD0;H0YMU9;A6NMY6;H0YM50;H0YKS4;B3KRQ1;H0YN28;H0YL33;H0YNP5;B4DNH8	HEL-S-270;ANXA2;ANXA2P2	-0.42478	0.999915
39S ribosomal protein L18, mitochondrial	A8K9D2;Q9H0U6	MRPL18	0.368252	0.999915
GTPase-activating protein and VPS9 domain-containing protein 1	A0A024R862;A0A024R8A2;Q14C86;F8W9S7;A0A024R875;B3KN67;C9IZ08;B4DK42	GAPVD1	0.686439	0.999915
NADH dehydrogenase [ubiquinone] iron-sulfur protein 6, mitochondrial	Q6IBC4;O75380;D6RBT3	NDUFS6	-0.391705	0.999915
Integrin alpha-7;Integrin alpha-7 heavy chain;Integrin alpha-7 light chain;Integrin alpha-7 70 kDa form	J3KNV4;Q4LE35;Q13683;B3KMS6	ITGA7;ITGA7 variant protein	-0.431432	0.999915
Protein syndesmos	B2RD96;Q9BRJ7;K7ENA3;K7EIN2;W4VSQ8	NUDT16L1	0.728858	0.999915
Catenin beta-1	B4DL06;A0A024R2Q3;P35222;B4DGU4;B5BU28;B4DSW9	CTNNB1	0.306164	0.999915
Farnesyl pyrophosphate synthase	P14324;B3KMW3;A0A087X1D8;A0A087WVN4;Q14329	FDPS	0.442541	0.999915
Tryptophan--tRNA ligase, cytoplasmic;T1-TrpRS;T2-TrpRS	A0A024R6K8;P23381	WARS	0.534608	0.999915
Centromere/kinetochore protein zw10 homolog	B2R7C2;O43264;B4E1J7	ZW10	0.432486	0.999915
Sister chromatid cohesion protein PDS5 homolog B	Q9NTI5;B7Z5S1	PDS5B	-0.57264	0.999915
Nexilin	Q0ZGT2;D3DQ79;H7BXY5;B4DDI0	NEXN	-0.425477	0.999915
NA	Q6MZV7;Q6PYX1	DKFZp686C11235	-0.445839	0.999915
26S proteasome non-ATPase regulatory subunit 14	A0A140VKF2;O00487;Q53TH1;Q59G89	PSMD14	-0.347592	0.999915
ATP synthase-coupling factor 6, mitochondrial	Q6IB54;P18859;Q6NZ59;A8MUH2	ATP5J	0.266191	0.999915
Proteasome subunit beta type-4	A0A140VK46;P28070;B4DFL3	PSMB4	0.565223	0.999915
40S ribosomal protein S5;40S ribosomal protein S5, N-terminally processed	M0R0F0;A0A024R4Q8;P46782;Q53G25;M0R0R2;M0QZN2	RPS5	-0.285413	0.999915
Lipoma-preferred partner	B7ZLW0;Q93052;A0A087WZF1;B7Z8W0;C9JUT4	LPP	0.348975	0.999915
Protein-tyrosine-phosphatase;Receptor-type tyrosine-protein phosphatase delta	Q59H90;Q3KPI9;F5GWR7;Q2HXI4;P23468	PTPRD	-0.560845	0.999915
Mesencephalic astrocyte-derived neurotrophic factor	A8K878;P55145	MANF	0.483065	0.999915
Chromobox protein homolog 3	A4D177;Q13185	CBX3	-0.454767	0.999915
Casein kinase II subunit alpha	E7EU96;Q5U5J2;P68400;Q2I0Y7;B2R6D7	CSNK2A1	0.564519	0.999915
Serine/threonine-protein kinase PAK 2;PAK-2p27;PAK-2p34;Non-specific serine/threonine protein kinase	Q13177;A8K5M4	PAK2	-0.528111	0.999915
Myomesin-1	P52179;A8MX12	MYOM1	0.226023	0.999915
NADH dehydrogenase [ubiquinone] 1 alpha subcomplex subunit 8	P51970;B7Z768	NDUFA8	-0.40544	0.999915
28S ribosomal protein S18b, mitochondrial	B0S7P4;Q9Y676;B4DFG6;A0A0G2JIC6	MRPS18B	-0.326634	0.999915
ADP-ribosylation factor-like protein 8A	B2R7U5;A0A024R977;Q96BM9	ARL8A	0.385593	0.999915
Protein prune homolog	Q86TP1;Q5SZG1	PRUNE	-0.784357	0.999915
NA	A0A090N8G0	GARS	0.397223	0.999915
Ferritin;Ferritin heavy chain;Ferritin heavy chain, N-terminally processed	Q6NZ44;B3KXC3;A0A024R525;P02794;Q6NS36;G3V192;G3V1D1;E9PRK8;E9PKY7;Q8TD27	FTH1	-0.616067	0.999915
Serine/threonine-protein kinase OSR1	A0A024R2M7;O95747;C9JIG9	OXSR1	0.776459	0.999915
UPF0585 protein C16orf13	A0A087WYU2;Q96S19;H3BS73;H3BNB2	C16orf13	-0.281699	0.999915
NADH dehydrogenase [ubiquinone] iron-sulfur protein 5	Q6IBA0;O43920	NDUFS5	-0.265133	0.999915
Moesin	V9HWC0;P26038;Q6PJT4	HEL70;MSN	-0.300326	0.999915
Ras-related protein Rab-27A	Q6IAS8;A2RU94;P51159;H3BN55;H3BUD9;H3BS49;H3BVH7	RAB27A	0.511193	0.999915
Mitochondrial import inner membrane translocase subunit Tim8 B	Q9Y5J9;G3XAN8	TIMM8B	-0.380755	0.999915
U6 snRNA-associated Sm-like protein LSm3	P62310;B2R5H5	LSM3	-0.450889	0.999915
Tetraspanin;CD81 antigen	E9PJK1;E9PRJ8;H0YDL9;H0YDJ9;A0A024RCB7;E9PIF1;A6NMH8;P60033	CD81	0.265258	0.999915
Glycogen phosphorylase, brain form;Alpha-1,4 glucan phosphorylase	P11216;Q59GM9;B4DSD8	PYGB	0.178127	0.999915
Erythrocyte band 7 integral membrane protein	A0A024R882;P27105;B4E2V5;B4DZK8	STOM	-0.376765	0.999915
Exportin-7	A8K607;Q9UIA9;E7ESC6;D3DSQ7;B4DSP8	XPO7	-0.69655	0.999915
Filamin-A	P21333;Q5HY54;Q60FE6;Q60FE5	FLNA	-0.326548	0.999915
Leucine--tRNA ligase, cytoplasmic	B4E266;B2RCM2;Q9P2J5;B4DER1;Q9H8E3	LARS	0.269313	0.999915
Alkyldihydroxyacetonephosphate synthase, peroxisomal	O00116;B7Z3Q4;A0A1B0GWA2	AGPS	0.516221	0.999915
Glutaredoxin-related protein 5, mitochondrial	Q86SX6	GLRX5	0.662354	0.999915
E3 SUMO-protein ligase RanBP2	P49792	RANBP2	0.623491	0.999915
S-(hydroxymethyl)glutathione dehydrogenase;Alcohol dehydrogenase class-3	Q6IRT1;Q6FI45;P11766;Q5U043;Q2VIM7;H0YAG8	ADH5	0.182301	0.999915
H/ACA ribonucleoprotein complex subunit 4	O60832;C9IYT0;U5UA77	DKC1	-0.550158	0.999915
Ras-related C3 botulinum toxin substrate 1;Ras-related C3 botulinum toxin substrate 3;Ras-related C3 botulinum toxin substrate 2	A4D2P1;A4D2P0;P63000;A4D2P2;A0A024R9T5;A0A024R1P2;P60763;P15153	RAC1;hCG_20693;RAC2;RAC3	-0.30945	0.999915
Hydroxymethylglutaryl-CoA lyase, mitochondrial	B1AK13;P35914	HMGCL	-0.368158	0.999915
60S ribosomal protein L8	P62917;B4DVG7;E9PKZ0;G3V1A1;E9PKU4	RPL8	-0.175694	0.999915
Protein mago nashi homolog	P61326	MAGOH	0.433307	0.999915
ATP synthase subunit g, mitochondrial	E9PN17;O75964	ATP5L	0.213844	0.999915
Probable leucine--tRNA ligase, mitochondrial	Q15031;E9PHM2	LARS2	0.56701	0.999915
Histone deacetylase;Histone deacetylase 2	B3KUJ5;Q92769	HDAC2	-0.663348	0.999915
SURP and G-patch domain-containing protein 2	A8K5G0;A0A024R7K0;M0R2Z9;Q8IX01;M0R3F6	SFRS14;SUGP2	0.446709	0.999915
Guanine nucleotide-binding protein G(o) subunit alpha	A0A142CHG9;P09471;Q8N6I9;B3KP89;H3BTM2;H3BN82	GNAO1	-0.872347	0.999915
NADH dehydrogenase [ubiquinone] 1 alpha subcomplex subunit 12	Q9UI09;Q53HG1;F8VRD8	NDUFA12	0.375927	0.999915
Sodium/potassium-transporting ATPase subunit alpha-1	P05023	ATP1A1	-0.206725	0.999915
39S ribosomal protein L53, mitochondrial	Q96EL3	MRPL53	0.430165	0.999915
NAD-dependent protein deacetylase sirtuin-3, mitochondrial	E9PM75;B7Z5J1;Q9NTG7;E9PK80;B7Z580;B7Z7G4;E9PN58;B7Z777	SIRT3	-0.495863	0.999915
Mitochondrial fission 1 protein	Q9Y3D6	FIS1	0.709136	0.999915
Cytochrome c oxidase subunit 7C, mitochondrial	P15954;D6R9Z7;Q71U45	COX7C	-0.309412	0.999915
TSC22 domain family protein 4	Q9Y3Q8;Q8IV54	TSC22D4	0.514236	0.999915
Aldehyde dehydrogenase, mitochondrial	P05091;Q53FB6;B4YAH7	ALDH2	-0.187908	0.999915
Prolyl 4-hydroxylase subunit alpha-1	P13674;Q5VSQ6	P4HA1	-0.504223	0.999915
Tubulin beta-6 chain	Q9BUF5;B4DP54;K7ESM5;B3KS31;B4E386	TUBB6	0.309259	0.999915
NADH dehydrogenase [ubiquinone] iron-sulfur protein 4, mitochondrial	A0A0S2Z433;O43181;H0Y9M8	NDUFS4	-0.353136	0.999915
Vacuolar protein sorting-associated protein 35	Q96QK1;Q53FR4;Q5HYM2	VPS35;DKFZp686O2462	-0.587049	0.999915
Catenin delta-1	C9JZR2;O60716;Q68DU0;Q96FS1;Q7KZJ3;A0A024R4Z0;A0A024R4Y7	CTNND1;DKFZp781O2021	0.349361	0.999915
Methylmalonate-semialdehyde dehydrogenase [acylating], mitochondrial	A0A024R6G4;Q02252;Q53H94;Q53FN8;G3V4Z4	ALDH6A1	-0.174356	0.999915
Calcium-transporting ATPase	A7E2D8;Q68DH9	ATP2B4;DKFZp686M088	0.388766	0.999915
Nucleosome assembly protein 1-like 1	F8VY35;F5H4R6;H0YIV4;A0A024RBB7;P55209;F8W020;F8W118;F8VV59;A0A024RBE6;F8W0J6;B7Z2V4;F8VRJ2;B7Z5H0;H0YH88;H0YHC3;F8VXI6;F8VUX1;B7Z9C2;F8VVB5	NAP1L1	0.481762	0.999915
Myosin light chain 4	A0A1C7CYY4;P12829;I3L1K6;I3L532;I3L3U1	MYL4	0.679762	0.999915
Biglycan	A6NLG9;B4DDQ2;Q53FI4;A8K7E0;P21810;B3KS75;Q53HU6;Q8NAB7;B4DNL4;B4DQD6;B4DDN7	BGN	0.59745	0.999915
Tubulin-specific chaperone A	E5RIW3;Q6FGD7;E5RJD8;O75347;E5RHG6	TBCA	-0.272316	0.999915
Splicing factor 3A subunit 1	A0A024R1K8;Q15459;B4E091	SF3A1	-0.594165	0.999915
DCC-interacting protein 13-alpha	Q9UKG1;B4DQX8	APPL1	0.673031	0.999915
Methionine adenosyltransferase 2 subunit beta	A0A140VJP2;Q9NZL9;A8K7A4;E5RJR3;H7C0X7	MAT2B	0.337978	0.999915
DNA repair protein RAD50	Q92878	RAD50	0.411391	0.999915
Tubulin alpha-4A chain	P68366	TUBA4A	0.449846	0.999915
Helicase SKI2W	Q9NPK3;O76046;Q15477;Q96BC0;B4E0N1;B4DM01;B4DSY1;A0A024RCU1;Q59F56	SKIV2L;SKI2W	0.518198	0.999915
FERM, RhoGEF and pleckstrin domain-containing protein 1	C9JME2;Q9Y4F1	FARP1	0.332125	0.999915
DnaJ homolog subfamily C member 8	O75937	DNAJC8	-0.66531	0.999915
Ezrin	Q6NUR7;E7EQR4;P15311;V9HW42;B2R6J2;B7Z5V2;B7Z437	EZR;HEL-S-105	-0.259031	0.999915
Syntaxin-binding protein 3	O00186	STXBP3	0.301512	0.999915
Hexokinase	B3KXY9	NA	-0.132282	0.999915
Myosin-binding protein C, cardiac-type	B6D425;A8MXZ9;Q14896;A0A0A0MQU5;F5GZR4;B4DNB5	MYBPC3	0.201782	0.999915
Cullin-5	Q93034;L0L6C1	CUL5	0.383805	0.999915
Echinoderm microtubule-associated protein-like 2	K7EIK7;O95834;A0A0C4DGQ7;C9JRL6;B7Z872;B7Z918	EML2	-0.444691	0.999915
Nucleoside diphosphate kinase;Nucleoside diphosphate kinase B	Q32Q12;Q6FHN3;J3KPD9;P22392;E7ERL0	NME1-NME2;NME2;NME1	0.329759	0.999915
Lethal(2) giant larvae protein homolog 1	A0A087WW77;Q15334;A0PJG1	LLGL1	0.631499	0.999915
Eukaryotic initiation factor 4A-I	A8K7F6;P60842;A8K088;J3KT12;Q59F68;J3KTB5;J3QS69;J3QL43;B4DNH2;J3QR64	EIF4A1	-0.168107	0.999915
Actin, cytoplasmic 2;Actin, cytoplasmic 2, N-terminally processed	P63261;B4E3A4;B4DVQ0;I3L3I0;I3L1U9	ACTG1	-0.308114	0.999915
Glyoxalase domain-containing protein 4	F6TLX2;Q9Y3E8;B4DX01;B7Z403;A8K8F0;Q9HC38;B3KV49;I3L3Q4	GLOD4	-0.218596	0.999915
Mitogen-activated protein kinase;Mitogen-activated protein kinase 1	Q1HBJ4;P28482;B4DHN0;Q499G7	MAPK1	0.282774	0.999915
Tumor susceptibility gene 101 protein	F5H442;Q99816;D3DQY6	TSG101	0.470466	0.999915
NADPH--cytochrome P450 reductase	B2R6E5;A8K3B4;Q59ED7;P16435;Q63HL4;B4DKM8;E7EMD0;B4DDH3	POR;DKFZp686G04235	0.600482	0.999915
Phosphoglucomutase-1	P36871;B4DFP1	PGM1	-0.129171	0.999915
Cysteine-rich protein 2	Q53FN1;P52943;H0YHD8;H0YFA4	CRIP2	0.57887	0.999915
Complement C4-A;Complement C4 beta chain;Complement C4-A alpha chain;C4a anaphylatoxin;C4b-A;C4d-A;Complement C4 gamma chain	A0A140TA49;A0A140TA32;A0A140TA29;A0A0G2JPR0;P0C0L4	C4A	-0.604683	0.999915
COP9 signalosome complex subunit 4	Q53FV3;B3KM48;A0A0S2Z5H7;Q9BT78;D6RFN0;D6RAX7;D6RD63	COPS4	0.368852	0.999915
Malic enzyme;NADP-dependent malic enzyme, mitochondrial	E9PMB9;B2R995;Q16798	ME3	-0.236605	0.999915
Target of Myb protein 1	B4DKQ5;O60784;B4DJ44;B3KUF5	TOM1	-0.502482	0.999915
Structural maintenance of chromosomes protein;Structural maintenance of chromosomes protein 3	Q86VX4;Q9UQE7;B0AZQ4	SMC3	-0.293028	0.999915
Acetolactate synthase-like protein	A1L0T0;M0R026;Q59GP4	ILVBL	0.481565	0.999915
Protein-L-isoaspartate O-methyltransferase;Protein-L-isoaspartate(D-aspartate) O-methyltransferase	A0A0A0MRJ6;H7BY58;P22061;F6S8N6;B7Z972	PCMT1	0.17492	0.999915
Cell division cycle and apoptosis regulator protein 1	Q8IX12;A0A0C4DGG8;F5H2E6;F5H1H2;F5H3E1	CCAR1	-0.589083	0.999915
Nuclear receptor-binding protein	B4DW31;Q9UHY1;F8W6G1	NRBP1	-0.47396	0.999915
Developmentally-regulated GTP-binding protein 1	Q9Y295	DRG1	-0.47265	0.999915
[Pyruvate dehydrogenase (acetyl-transferring)] kinase isozyme 2, mitochondrial	Q15119;B4DLP2;D6RDN9	PDK2	0.462816	0.999915
Golgi apparatus protein 1	Q92896;H3BM42	GLG1	-0.338486	0.999915
4-aminobutyrate aminotransferase, mitochondrial	X5D8S1;H3BRN4;P80404;H3BNQ7;B7Z1V4	ABAT	0.447971	0.999915
ATP-dependent Clp protease ATP-binding subunit clpX-like, mitochondrial	A0A024R5X7;O76031;Q9H072	CLPX;DKFZp586J151	0.238735	0.999915
Deoxyuridine 5-triphosphate nucleotidohydrolase, mitochondrial	P33316;H0YNW5;H0YKC5;H0YKI0;A0A0C4DGL3;H0YMM5;H0YNJ9	DUT	-0.280615	0.999915
60S ribosomal protein L18a	M0R117;B4DM74;Q02543;M0R3D6;M0R1A7;B4DM94;B4DUV3;B2R4C0;Q53HD3;M0R0P7;Q32XH3	RPL18A	-0.153468	0.999915
Dynactin subunit 3	O75935;X6RA56;X6RCK5;A0A0A0MRV8;Q8NB28;X6RLR1	DCTN3	0.263833	0.999915
Nucleolar transcription factor 1	E9PKP7;P17480;B4DNQ1;A8K962;O00164;Q05BZ1;B4DLB0	UBTF	0.475225	0.999915
Cat eye syndrome critical region protein 5	Q9BXW7	CECR5	-0.199598	0.999915
Nuclear migration protein nudC	Q9Y266;Q9H2R7;A0A0A0MSU9	NUDC;NPD011	-0.421404	0.999915
BTB/POZ domain-containing protein KCTD12	B3KY04;A0A140VJM4;Q96CX2	KCTD12	-0.312016	0.999915
NA	H7BZJ3	PDIA3	0.508788	0.999915
DNA mismatch repair protein Msh2	P43246;V9H019;Q53GS1;Q53FK0;E9PHA6;Q53RU4;B4DL39;B4DSB9;V9H068;V9H0D5;V9H023	MSH2	0.442616	0.999915
Lipopolysaccharide-responsive and beige-like anchor protein	P50851	LRBA	0.405583	0.999915
Adenylyl cyclase-associated protein;Adenylyl cyclase-associated protein 1	D3DPU2;B2RDY9;B4DNW7;Q01518;B4DI38;B4DNY3;B4DNA3;B4DUZ8	CAP1	-0.262142	0.999915
Striated muscle preferentially expressed protein kinase	Q15772	SPEG	0.668126	0.999915
Translation initiation factor IF-2, mitochondrial	P46199;Q6P1N2;Q8IWH1	MTIF2	-0.372274	0.999915
Myelin expression factor 2	A0A0A0MQW0;A0A0A0MR39;A0A087WUT0;Q9P2K5;A0A024R5Q6	MYEF2	-0.30981	0.999915
Enoyl-CoA hydratase domain-containing protein 3, mitochondrial	A0A140VKF9;Q96DC8;Q5W0J8	ECHDC3	0.262712	0.999915
Chloride channel CLIC-like protein 1	A0A024R0G0;Q96S66;A0A024R095	CLCC1	-0.44372	0.999915
Prefoldin subunit 4	E9PQY2;Q9NQP4	PFDN4	-0.358894	0.999915
Oxygen-dependent coproporphyrinogen-III oxidase, mitochondrial	P36551	CPOX	-0.401857	0.999915
Ras GTPase-activating protein-binding protein 2	A8K6V7;A0A024RDB2;A0A024RDE5;Q9UN86	G3BP2	0.414458	0.999915
NADH dehydrogenase [ubiquinone] 1 beta subcomplex subunit 5, mitochondrial	E7EWP0;D3DNS1;B2R9L0;H0Y886;O43674;Q05D62	NDUFB5	-0.296109	0.999915
Cytoskeleton-associated protein 4	A0A024RBH2;Q07065;B3KVX6;Q8TB01;Q6NWZ1	CKAP4	-0.181997	0.999915
Alpha-2-macroglobulin receptor-associated protein	B2R6S9;P30533;A8K8F6	LRPAP1	0.435957	0.999915
Vimentin	V9HWE1;P08670;B0YJC4;Q53HU8;B3KRK8	HEL113;VIM	-0.292214	0.999915
Lysophospholipid acyltransferase 7	B4DDH8;Q96N66	MBOAT7	0.229123	0.999915
EMILIN-1	A0A0C4DFX3;Q9Y6C2	EMILIN1	-0.359527	0.999915
Mitochondrial carrier homolog 1	A8YXX5;Q9Y374;A4FVA6;A0A024RD08;A0A024RCX4;Q9NZJ7;H0Y8C3;Q8IW90	PIG60;MTCH1	0.32858	0.999915
RNA-binding protein with serine-rich domain 1	H3BPG5;H3BV80;H3BMM9;H3BTC0;D3DU92;Q15287;H3BMS0;A0A024R9P1	RNPS1;hCG_2026745	0.355263	0.999915
Transmembrane emp24 domain-containing protein 9	B2R8A2;A0A024R7M0;Q9BVK6	TMED9	0.424025	0.999915
NADH dehydrogenase [ubiquinone] 1 alpha subcomplex assembly factor 3	Q9BU61	NDUFAF3	0.310429	0.999915
Ras-related protein Rab-18	Q9NP72;A0A087X163;B7Z5V3;Q5W0J0;B7Z4P9;H0Y6T8	RAB18	0.255089	0.999915
Ubiquitin-conjugating enzyme E2 N	V9HW41;P61088;F8VSD4;F8VV71;F8VZ29	HEL-S-71;UBE2N	-0.256874	0.999915
Prenylcysteine oxidase 1	Q9UHG3;B7Z8A2;Q584P1;B7Z3Y2;F8W8W4	PCYOX1	0.167489	0.999915
Methyl-CpG-binding protein 2	A0A140VKC4;E9LUH3;D3YJ43;D0UU70;E9LUH4;P51608;E1B2J3;C6KG45;D9ZNA4;D5L9I5;A8K079;D6QZ43;A0A087X1U4;C6KG44;I6LM39;A0A075BPP5;A0A0S2Z401	MECP2	0.309808	0.999915
Guanine nucleotide-binding protein subunit alpha-11	Q59FM5;P29992;K7EL62	GNA11	0.289339	0.999915
Malectin	Q14165;F5H1S8;H0YG07	MLEC	-0.312941	0.999915
Redox-regulatory protein FAM213A	Q9BRX8	FAM213A	0.284871	0.999915
Selenium-binding protein 1	V9HWG1;Q13228;B4DPI7	HEL-S-134P;SELENBP1	-0.345398	0.999915
ATP synthase subunit d, mitochondrial	O75947;A0PJH2	ATP5H	0.200521	0.999915
Protein-glutamine gamma-glutamyltransferase 2	V9HWG3;P21980;B4DIT7;B4DTN7	HEL-S-45;TGM2	0.18645	0.999915
Myosin-13	Q9UKX3	MYH13	0.451414	0.999915
Cullin-associated NEDD8-dissociated protein 2	O75155	CAND2	0.242731	0.999915
Thioredoxin-like protein 1	V9HW51;B2R960;O43396;Q59G46;K7ER96	HEL-S-114;TXNL1	0.433867	0.999915
Armadillo repeat-containing X-linked protein 1	A0A024RCI6;Q9P291	ARMCX1	-0.588482	0.999915
Glutathione S-transferase Mu 2	Q0D2I8;P28161;E9PHN7;A8HT81;E9PHN6;F6XZQ7;E9PLF1	GSTM2	-0.24932	0.999915
39S ribosomal protein L49, mitochondrial	A0A024R578;Q13405;H0YDP7;Q59GE9	MRPL49	0.290191	0.999915
Mitochondrial import inner membrane translocase subunit Tim9	A0A024R648;Q9Y5J7;G3V502;G3V2F3	TIMM9	-0.307169	0.999915
NADH dehydrogenase [ubiquinone] 1 alpha subcomplex subunit 13	Q9P0J0;B4DEZ3;K7EJE1;E7ENQ6;B4DQP1	NDUFA13	-0.246534	0.999915
40S ribosomal protein S21	Q8WVC2;Q6FGH5;P63220;Q9BYK1	RPS21	0.215786	0.999915
Hepatoma-derived growth factor-related protein 3	A0A024R216;Q9Y3E1	HDGFRP3	0.382697	0.999915
Transgelin	Q6FI52;Q5U0D2;Q01995;Q53GC9;H0YCU9;Q59FA5	TAGLN	-0.382473	0.999915
Calreticulin	Q53G71;V9HW88;P27797;B4DHR1;K7EJB9;B4E2Y9	HEL-S-99n;CALR	-0.298654	0.999915
COP9 signalosome complex subunit 8	E9PGT6;B2R8N1;A0A024R4D1;Q99627;H7C3S9	COPS8	0.482018	0.999915
Nicastrin	Q92542;B4DR82;H0Y6T7;B4DJN0	NCSTN	-0.310037	0.999915
Major vault protein	X5D2M8;Q14764;X5D7K9;B4DXN0;B4DDR2;B4DP93;X5DNU0;X5D7S8	MVP	-0.291221	0.999915
THO complex subunit 2	Q8NI27;A0A0C4DG98	THOC2	-0.24922	0.999915
NADH dehydrogenase [ubiquinone] 1 alpha subcomplex subunit 9, mitochondrial	Q9BTT5;Q16795;A8K4V2	NDUFA9	-0.200589	0.999915
Mitochondrial fission regulator 1-like	A0A0S2Z5H6;B4DRE5;Q9H019;E9PLD2;B2RAQ5;C9JF50;E9PLU1;E9PRK5;B3KPT5	MTFR1L	-0.299225	0.999915
Alpha-actinin-2	P35609;B7Z2N5;B7Z4P6;Q59FD9;B7Z4K1;F6THM6	ACTN2	0.189066	0.999915
Thymosin beta-4;Hematopoietic system regulatory peptide	A2VCK8;P62328;Q0P5T0;Q0P5U7;Q0P5Q0;Q0P5P4;Q0P5N8	TMSB4X	-0.534577	0.999915
Regulation of nuclear pre-mRNA domain-containing protein 1B	Q9NQG5;A2A2M0	RPRD1B	0.384335	0.999915
Myosin-1	V9HWC1;P12882	HEL71;MYH1	0.585168	0.999915
Catalase	P04040;B4DWK8	CAT	0.225431	0.999915
N-acetyl-D-glucosamine kinase	Q9UJ70;H7C3G9;C9JEV6;H7C1L7;H0YEB7	NAGK	-0.544917	0.999915
Ubiquitin carboxyl-terminal hydrolase 28;Ubiquitin carboxyl-terminal hydrolase	Q96RU2;B4E3L3;G3V1N5	USP28	0.309828	0.999915
X-ray repair cross-complementing protein 5	P13010;Q53T09	XRCC5	-0.164198	0.999915
Transmembrane protein 14C	Q53F27;A0A024R001;Q9P0S9	TMEM14C	0.486939	0.999915
60S ribosomal protein L35a	P18077;C9K025;F8WBS5;F8WB72	RPL35A	-0.310101	0.999915
Tripeptidyl-peptidase 1	B4DSE2;B4E0C7;Q53HP2;D3DQU2;O14773;B2R608;B4DE89	TPP1	-0.319233	0.999915
Signal transducer and activator of transcription 1-alpha/beta;Signal transducer and activator of transcription	P42224;J3KPM9	STAT1	0.240921	0.999915
Optic atrophy 3 protein	Q9H6K4;B4DK77	OPA3	-0.238685	0.999915
Methylcrotonoyl-CoA carboxylase subunit alpha, mitochondrial	A0A0S2Z693;Q96RQ3;E9PHF7;Q68D27;F5GYT8;E9PG35;B4DH16;G5E9X5;B4DHW5	MCCC1;DKFZp686B20267	-0.234119	0.999915
Cadherin-2	A0A024RC42;P19022	CDH2	-0.303234	0.999915
NADPH:adrenodoxin oxidoreductase, mitochondrial	Q6GSK2;P22570;B4DDI9;A0A0C4DFN8;A0A0A0MSZ4;A0A0A0MTR6;A0A0C4DGN7	FDXR	0.229327	0.999915
Single-stranded DNA-binding protein;Single-stranded DNA-binding protein, mitochondrial	Q567R6;A4D1U3;Q04837;A0A0G2JLD8;E7EUY5;B7Z268;C9K0U8	SSBP1	0.159353	0.999915
Titin	Q8WZ42	TTN	0.130342	0.999915
Enhancer of mRNA-decapping protein 4	Q6P2E9;B7Z7V8	EDC4	0.300098	0.999915
Poly(U)-binding-splicing factor PUF60	A0A0J9YYL3;A0A0J9YVP6;A0A0J9YXJ8;A0A0J9YXX5;Q9UHX1;A0A0J9YVR6;E9PQ56;A0A0J9YWM1;H0YEM1	PUF60	0.27935	0.999915
CAD protein;Glutamine-dependent carbamoyl-phosphate synthase;Aspartate carbamoyltransferase;Dihydroorotase	F8VPD4;P27708;Q53SY7	CAD	0.357341	0.999915
Protein scribble homolog	A0A0G2JNZ2;A0A0G2JPP5;Q14160;A0A0G2JMS7	SCRIB	0.365413	0.999915
Voltage-dependent calcium channel subunit alpha-2/delta-1;Voltage-dependent calcium channel subunit alpha-2-1;Voltage-dependent calcium channel subunit delta-1	P54289;Q9UIU0;Q9UDQ3	CACNA2D1;WUGSC:H_DJ0560O14.1	0.192775	0.999915
Cofilin-2	Q549N0;Q9Y281	CFL2	0.202087	0.999915
Actin-related protein 2/3 complex subunit 1A	V9HVZ6;Q92747;Q53GB6;A0A0K0K1L3;Q59GQ0;E9PF58;Q75MY0	HEL-68;ARPC1A	0.238406	0.999915
Glutathione peroxidase;Phospholipid hydroperoxide glutathione peroxidase, mitochondrial	K7ERP4;A0A087X2I2;A0A087WT12;P36969;Q6PI42;K7EJ20;K7EKX7;R4GNE4;K7ENB4	GPX4	0.253555	0.999915
Cysteine desulfurase, mitochondrial	Q5QP19;Q53FP3;Q9Y697;B2R5S3;B4DNL7;F2Z2E7	NFS1	-0.306264	0.999915
Annexin;Annexin A1	Q5TZZ9;P04083;B5BU38	ANXA1	-0.396302	0.999915
Coiled-coil domain-containing protein 6	Q05CP8;A0A024QZJ7;Q16204	CCDC6	0.274348	0.999915
Fragile X mental retardation syndrome-related protein 2	P51116	FXR2	0.26221	0.999915
Vitamin K-dependent protein S	Q9NSD0;Q16519;A0A0S2Z4K3;A0A0S2Z4L3;P07225;G5E9F8;B4E1L6	PROS1	0.40117	0.999915
Calcium-regulated heat stable protein 1	Q9Y2V2;H3BSW7;H3BUY4;H3BPY5;H3BNU9;H3BTK3;I3L3X8	CARHSP1	0.24977	0.999915
Ras-related protein Rab-7a	A0A158RFU6;P51149;C9J8S3;C9J4V0;C9J4S4;C9J592	RAB7A	0.291037	0.999915
Myeloid-derived growth factor	M0QXF7;M0QYN0;Q969H8	MYDGF	-0.537915	0.999915
Acetyl-CoA acetyltransferase, mitochondrial	A0A140VJX1;P24752	ACAT1	-0.250013	0.999915
NA	B4DJ09	NA	0.26567	0.999915
X-ray repair cross-complementing protein 6	A0A024R1N4;P12956;B1AHC9;B2RDN9;B4DE32;B4E356	XRCC6	-0.328501	0.999915
Delta-1-pyrroline-5-carboxylate synthase;Glutamate 5-kinase;Gamma-glutamyl phosphate reductase	P54886	ALDH18A1	0.630624	0.999915
Dynein light chain 1, cytoplasmic	Q6FGH9;P63167;F8VXL2;F8VRV5	DNCL1;DYNLL1	0.447968	0.999915
Chromobox protein homolog 5	V9HWG0;P45973;Q6I9T7	HEL25;CBX5	-0.512286	0.999915
Sec1 family domain-containing protein 1	Q53GW1;Q8WVM8;B7Z738;B7Z5N7	SCFD1	-0.34749	0.999915
Proteasome subunit beta type;Proteasome subunit beta type-6	Q6IAT9;P28072	PSMB6	0.307873	0.999915
Guanine nucleotide-binding protein G(s) subunit alpha isoforms short;Guanine nucleotide-binding protein G(s) subunit alpha isoforms XLas	A0A0S2Z3H8;P63092;Q5JWF2;B0AZR9;A0A0S2Z3S5;Q14455;Q5FWY2;S4R3E3	GNAS;GSA	0.27921	0.999915
28S ribosomal protein S29, mitochondrial	P51398;V9GYL9;V9GYJ9;V9GZ03;V9GYW1;V9GYA7	DAP3	-0.414071	0.999915
NADH dehydrogenase [ubiquinone] iron-sulfur protein 2, mitochondrial	O75306;B7Z792;Q53HG2;B7Z9L2	NDUFS2	-0.24448	0.999915
Bone marrow stromal antigen 2	A0A024R7H5;B4E0Z6;Q10589	BST2	-0.281706	0.999915
ATP synthase subunit epsilon-like protein, mitochondrial;ATP synthase subunit epsilon, mitochondrial	Q5VTU8;P56381	ATP5EP2;ATP5E	-0.226221	0.999915
Protein unc-45 homolog B	Q8IWX7;H0UID2	UNC45B	-0.17852	0.999915
Mitochondrial import inner membrane translocase subunit Tim13	Q9Y5L4;K7EIT2	TIMM13	-0.328252	0.999915
Protein lin-7 homolog C	Q53FX5;Q9NUP9;G3V1D4	LIN7C	0.375489	0.999915
40S ribosomal protein S23	A8K517;P62266;D6RD47	RPS23	-0.157517	0.999915
Serine/threonine-protein kinase WNK1	D3DUP2;F5GWT4;D3DUP1;Q9H4A3;A5D8Z4	WNK1	0.30197	0.999915
Alcohol dehydrogenase [NADP(+)]	V9HWI0;P14550	HEL-S-165mP;AKR1A1	0.208675	0.999915
Sorbitol dehydrogenase	V9HW89;Q00796;H0YLA4;B4DKI2	HEL-S-95n;SORD	0.320681	0.999915
Stomatin-like protein 2, mitochondrial	Q9UJZ1;A0A087WYB4;Q6ZNW0	STOML2	-0.152659	0.999915
Brain acid soluble protein 1	P80723	BASP1	-0.336802	0.999915
Homer protein homolog 1	Q53F18;Q86YM7;Q5U5K4;Q86YM6	HOMER1	-0.409286	0.999915
Alpha-soluble NSF attachment protein	M0R0Y2;A0A024R0R9;P54920;M0R2M1	NAPA	0.23385	0.999915
ATP-binding cassette sub-family E member 1	P61221;D6R9I9	ABCE1	0.33527	0.999915
Hepatoma-derived growth factor	P51858;B2RDE8;A8K8G0;B7Z958;B7Z525	HDGF	0.391229	0.999915
Lupus La protein	B5BUB5;P05455	SSB	-0.201845	0.999915
60S acidic ribosomal protein P2	A0A024RCA7;P05387	RPLP2	0.262213	0.999915
Peptidyl-prolyl cis-trans isomerase;Peptidyl-prolyl cis-trans isomerase B	V9HWC6;P23284	HEL-S-39;PPIB	-0.162552	0.999915
ADP/ATP translocase 1	A0A0S2Z3H3;P12235;V9GYG0;A0A0S2Z359;A0A0S2Z3C4	SLC25A4	0.231292	0.999915
Protein disulfide-isomerase A6	Q15084	PDIA6	-0.197874	0.999915
Eukaryotic translation initiation factor 2 subunit 3;Putative eukaryotic translation initiation factor 2 subunit 3-like protein	P41091;Q2VIR3;F8W810	EIF2S3;EIF2S3L	-0.236123	0.999915
Tropomodulin-1	P28289	TMOD1	0.187384	0.999915
Neuroblast differentiation-associated protein AHNAK	Q09666	AHNAK	-0.146388	0.999915
NADH dehydrogenase [ubiquinone] 1 alpha subcomplex subunit 6	A0A0C4DGS0;P56556;R4GN43	NDUFA6	-0.301348	0.999915
Nidogen-2	Q14112;A0A087WZP6;H0YJV3;B4DPX8	NID2	-0.221837	0.999915
Vasodilator-stimulated phosphoprotein	A0A0S2Z4I9;A0A0S2Z4N8;A0A024R0V4;P50552;A0A0S2Z4I7	VASP	0.242474	0.999915
Basic leucine zipper and W2 domain-containing protein 2	B7Z4K8;E7ETZ4;B3KM68;A0A024RA42;Q9Y6E2;Q75MG1;B5MCH7;B5MCE7;E9PFD4	BZW2	-0.285923	0.999915
Glutaredoxin-3	A0A140VJK1;O76003	GLRX3	0.239629	0.999915
NA	D3DSM4;D3DSM5;Q8NG19;H7C457	COL18A1	-0.252255	0.999915
Phosphoribosyl pyrophosphate synthase-associated protein 1	A0A024R8M4;Q14558;B4DP31	PRPSAP1	0.279658	0.999915
Calcium/calmodulin-dependent protein kinase type II subunit alpha	Q8IWE0;Q7LDD5;Q9UQM7;A8K161	CAMK2A	0.287247	0.999915
Glucose-6-phosphate isomerase	B4DE36;P06744;A0A0A0MTS2;K7EQ48;A0A0J9YXP8;A0A0J9YX90;A0A0J9YYH3	GPI	0.217465	0.999915
60S ribosomal protein L12	P30050;Q59FI9	RPL12	-0.16766	0.999915
Serine hydroxymethyltransferase;Serine hydroxymethyltransferase, mitochondrial	V9HW06;Q53ET4;P34897;A0A024RB99;Q5HYG8;B4DW25;B4E1G2;B4DJQ3;B4DP88;Q5BJF5;B4DJ63;B4DWA7;B4DLV4;H0YIZ0	HEL-S-51e;SHMT2;DKFZp686P09201	0.177499	0.999915
Endoplasmic reticulum-Golgi intermediate compartment protein 2	A0A024RB08;A0A087WU02;Q9HC06;Q96RQ1;H0YI50;F8VPA6	ERGIC2	0.430931	0.999915
Sideroflexin;Sideroflexin-3	A0A0A0MS41;B4DRS6;Q9BWM7;S4R3N9	SFXN3	0.368944	0.999915
E3 ubiquitin-protein ligase TRIM63	Q6NR77;Q969Q1	TRIM63	-0.348169	0.999915
Ribosomal protein L19;60S ribosomal protein L19	J3QR09;J3KTE4;P84098;Q53G49;Q8IWR8;J3QL15	RPL19	0.290696	0.999915
Nesprin-1	Q8NF91;E7ENN3;Q7RTM4	SYNE1	-0.551588	0.999915
Phospholipase A-2-activating protein	Q9Y263;E5RIM3	PLAA	-0.297312	0.999915
Flotillin-1	Q5ST80;O75955;Q6IB58;Q53HQ0;A0A140T9R1;A2VCL5;A0A140T9X0;A2AB09;A2AB10	FLOT1	-0.188682	0.999915
Prostaglandin E synthase 3	A0A024RB32;A0A087WYT3;B3KUY2;Q15185;B4DDC6	PTGES3	0.22345	0.999915
FAS-associated factor 2	Q96CS3;B4E2M8	FAF2	0.362458	0.999915
Elongation factor Tu, mitochondrial	P49411	TUFM	-0.113209	0.999915
3-hydroxyisobutyryl-CoA hydrolase, mitochondrial	A0A140VJL0;Q6NVY1;B9A058	HIBCH	0.139405	0.999915
Ig alpha-1 chain C region	Q6MZW0;Q9UP60;Q8NCL6;Q96K68;Q6N090;P01876;Q8WY24	DKFZp686J11235;SNC73;DKFZp686G21220;IGHA1	-1.03489	0.999915
Integrin beta-1	P05556	ITGB1	0.145839	0.999915
Torsin-1A-interacting protein 1	A0A0A0MSK5;Q5JTV8;J3KN66;H0YD16	TOR1AIP1	0.561691	0.999915
Tubulin beta-4B chain	Q8IZ29;P68371;Q8N6N5;Q8IWP6;B3KML9;Q96HX0	TUBB2C;TUBB4B	0.113586	0.999915
NADH dehydrogenase [ubiquinone] 1 beta subcomplex subunit 11, mitochondrial	Q7Z4X2;Q9NX14	NDUFB11	-0.249845	0.999915
Drebrin-like protein	Q9UJU6;B4DDD6;Q59FH4;H0Y5J4;B4DDU5;B4DKZ4;B4DXL9;B4DUF9	DBNL	-0.333211	0.999915
Non-POU domain-containing octamer-binding protein	A8K525;A0A0S2Z4Z9;Q15233;H7C367;C9JYS8	NONO	0.212487	0.999915
40S ribosomal protein S15a	B2R4W8;P62244;I3L3P7;A8K7H3;I3L246	hCG_1994130;RPS15A	-0.125068	0.999915
26S proteasome non-ATPase regulatory subunit 8	K7EJR3;Q5U0B3;R4GMR5;V9HW09;P48556;K7EJC1;B4E2Y4	PSMD8;HEL-S-91n	0.194568	0.999915
Ubiquitin-conjugating enzyme E2 L3	A8K4W8;A0A024R1A4;P68036	UBE2L3	0.350932	0.999915
26S proteasome non-ATPase regulatory subunit 12	A0A0S2Z489;O00232;A0A0S2Z476	PSMD12	0.164132	0.999915
Heterogeneous nuclear ribonucleoprotein A0	Q13151	HNRNPA0	-0.277187	0.999915
Oligoribonuclease, mitochondrial	H0YGR4;F5GYG5;Q9Y3B8;H0YG54	REXO2	-0.457666	0.999915
Interferon-inducible double-stranded RNA-dependent protein kinase activator A	O75569;F8WEG8;G5E9Q4;C9JMM3	PRKRA	0.225187	0.999915
5-AMP-activated protein kinase catalytic subunit alpha-2	P54646;B2RA25;A0MZF5;A0A087WXX9	PRKAA2	-0.318767	0.999915
Lysophospholipase-like protein 1	Q5VWZ2	LYPLAL1	-0.260006	0.999915
T-complex protein 1 subunit alpha	P17987;E7ERF2;E7EQR6;F5H282	TCP1	0.128066	0.999915
NAD-dependent protein deacylase sirtuin-5, mitochondrial	A0A024R012;Q9NXA8	SIRT5	0.214702	0.999915
Phosphoglycerate mutase 2;Phosphoglycerate mutase	P15259;A4D2J6	PGAM2	-0.263275	0.999915
High mobility group protein B3	E7ES08;E7EQU1;O15347;E9PES6;Q7Z684	HMGB3;DKFZp779G118	-0.624334	0.999915
NADH dehydrogenase [ubiquinone] 1 beta subcomplex subunit 6	O95139;A0A087WZX2	NDUFB6	0.232469	0.999915
Sorting nexin-2	B3KN57;B3KML1;O60749;Q53GG3	SNX2	0.468193	0.999915
Galectin-3-binding protein	B4DVE1;A0A0S2Z3Y1;Q08380;B3KP88;B4DDG4;B4DWA8;B4DI70;K7EP36	LGALS3BP	0.47754	0.999915
Tropomyosin beta chain	P07951;Q5TCU8	TPM2	-0.369721	0.999915
Metaxin-1	A0A0A0MRK6;Q13505	MTX1	0.321475	0.999915
Calsequestrin-2;Calsequestrin	O14958;B4DEF0	CASQ2	-0.255023	0.999915
Perilipin;Perilipin-2	B4DJK9;Q6FHZ7;Q99541;B4DNH6	ADFP;PLIN2	0.357078	0.999915
Prefoldin subunit 5	Q99471;H3BPF6	PFDN5	-0.27014	0.999915
Apoptosis inhibitor 5	G3V1C3;Q9BZZ5;B4DDR3;H0YER7	API5	0.280405	0.999915
Proteasome subunit alpha type;Proteasome subunit alpha type-2	Q53GF5;A0A024RA52;P25787;C9JCK5	PSMA2	-0.188454	0.999915
Fascin	B3KTA3;Q16658	FSCN1	0.20573	0.999915
Protein-methionine sulfoxide oxidase MICAL3	Q7RTP6	MICAL3	-0.502345	0.999915
Actin-related protein 3	A0A024RAI1;P61158;B4DXW1;Q59FV6;B4DT29;B4DTI0	ACTR3	-0.182397	0.999915
NA	A0A0J9YYJ7;A0A0J9YW50;A0A0J9YY01	NA	0.176584	0.999915
SWI/SNF-related matrix-associated actin-dependent regulator of chromatin subfamily B member 1	Q9H836;G5E975;Q12824;B5MCL5;C9JTA6;A0A0G2JSE9;Q86WI8;A0A0U1RQQ2;Q86WI7;A0A0U1RRB8;B4E117;B4DRT1	SMARCB1	0.390668	0.999915
40S ribosomal protein S12	P25398	RPS12	-0.157645	0.999915
Isocitrate dehydrogenase [NAD] subunit gamma, mitochondrial;Isocitrate dehydrogenase [NAD] subunit, mitochondrial	P51553;D3DWV9;E9PF84;G5E9Q7;E7EQB8;O15384	IDH3G;hCG_2004980	0.23135	0.999915
Mth938 domain-containing protein	Q9H7C9;E9PNP3;E9PR47;E9PIQ4	AAMDC	0.201016	0.999915
Cardiac phospholamban	Q5R352;P26678	PLN	0.187564	0.999915
NA	B0ZBE8	NPPA	-0.471367	0.999915
WD repeat-containing protein 5	P61964	WDR5	0.425822	0.999915
Cytochrome c oxidase subunit 3	A0A075X871;A0A059QTG6;H9E795;A0A075X6R4;H9E7H3;H9E7J9;B4YCG0;T1Q6R9;T1Q5Q2;T1Q5P3;T1Q5B9;S4T6M3;Q9B2X0;Q9B2W9;Q9B2U6;Q9B1S6;Q9B1S4;Q8WCY1;Q8HNQ7;Q85L10;Q85L04;Q85KZ1;Q85KW2;Q85KW0;Q7YEF1;Q7YCF3;Q7YCE5;Q7YCE0;Q7YCC7;Q7Y664;Q6WQG6;Q6WQA1;Q6RRW7;Q6RPE6;Q6RMU0;Q6RLY3;Q6R0W6;Q6R0Q1;Q5SB31;Q5SAG0;Q4F2U0;Q4F2A8;Q4F1I5;Q4F0P9;Q4EZD1;Q4EXJ4;Q305X3;Q305K6;Q305I0;Q27H55;Q15IP0;Q15II8;Q0G899;I6N522;F1AKZ3;E0…	COX3;COIII;CO3;coxIII;MT-CO3	-0.250097	0.999915
Aconitate hydratase;Cytoplasmic aconitate hydratase	V9HWB7;P21399;Q9HBB2;Q59FI0	HEL60;ACO1;IRP1	0.215105	0.999915
D-dopachrome decarboxylase;D-dopachrome decarboxylase-like protein	Q53Y51;P30046;B4DJQ7;J3KQ18;A0A0F7RPW6;B5MC82;B4E259;A6NHG4	DDT;DDTL	-0.257331	0.999915
Aconitate hydratase, mitochondrial	A0A0K0K1H7;A2A274;Q99798;B4DZ08;B2RBW5;B4DJW1;B4DW08	ACO2	-0.135741	0.999915
Eukaryotic peptide chain release factor GTP-binding subunit ERF3A	Q7KZX8;B2RCT6;A8K2W7;P15170;H3BR35	GSPT1	-0.259027	0.999915
14-3-3 protein epsilon	V9HW98;P62258;G9K389;G9K388;B4DJB0;B4DJF2;I3L3T1	HEL2;YWHAE;YWHAE/FAM22B fusion;YWHAE/FAM22A fusion	-0.101721	0.999915
Long-chain-fatty-acid--CoA ligase 3	B3KN05;B2RBE0;A0A024R497;O95573	ACSL3	0.213797	0.999915
U1 small nuclear ribonucleoprotein A	B2R802;P09012;M0R268;M0QXK2;M0R221;M0R2B8;M0R0G9;B4DDC7	SNRPA	-0.334241	0.999915
Sialic acid synthase	Q9NR45;V9HW39	NANS;HEL-S-100	0.235433	0.999915
Inorganic pyrophosphatase 2, mitochondrial	Q9H2U2;B4DR66;D6R967	PPA2	0.269966	0.999915
mRNA cap guanine-N7 methyltransferase	O43148;A8K946;Q05D80;K7EP06;Q05DQ2	RNMT	-0.576736	0.999915
NADH dehydrogenase [ubiquinone] 1 beta subcomplex subunit 8, mitochondrial	O95169;K9J7I2;E9PQ68	NDUFB8	-0.308694	0.999915
Heterogeneous nuclear ribonucleoprotein L-like	B7WPG3;C9IYN3;A8K894;D6W592;A0A0S2Z6K1;Q8WVV9;A0A0S2Z5U3	HNRNPLL;HNRPLL	-0.271841	0.999915
Fumarylacetoacetate hydrolase domain-containing protein 2A;Fumarylacetoacetate hydrolase domain-containing protein 2B	A0A024RE27;Q96GK7;Q6P2I3;D3DXG4;D3DXG5	FAHD2A;FAHD2B;hCG_2002650	-0.125087	0.999915
Histone H1.3	P16402	HIST1H1D	-0.246187	0.999915
Delta-aminolevulinic acid dehydratase	B7Z3I9;A0A140VJL9;A0A024R877;Q6ZMU0;P13716;B7ZBK6	ALAD	0.222732	0.999915
5-AMP-activated protein kinase catalytic subunit alpha-1	Q13131;Q96E92	PRKAA1	0.236517	0.999915
Katanin p60 ATPase-containing subunit A-like 2	K7EM02;K7EIJ8;Q8IYT4	KATNAL2	0.180468	0.999915
Valine--tRNA ligase	A0A024RCN6;P26640;A0A140T936	VARS	0.206356	0.999915
Serine/arginine-rich splicing factor 11	Q05BU6;Q6PJY9;Q6PKC9;Q5T760;Q6PJB9;Q05519;B4DWT1;B4DTC1	SFRS11;SRSF11	-0.3047	0.999915
Alpha-centractin	P61163;R4GMT0;B4DM97;B4DXP9;A0A1B0GVS3;B4DMT4	ACTR1A	0.311237	0.999915
Nodal modulator 1	A0A0G2JN29;A0A087X117;Q15155;A0A0G2JP90;A0A087WW46	NOMO1	0.284729	0.999915
NLR family member X1	Q86UT6;B7Z889	NLRX1	-0.196739	0.999915
Ribosome-binding protein 1	A7BI36;A0A0A0MRV0;Q9P2E9;A1A5C4;A1A5C5;F8W7S5;A0A087WVV2	RRBP1	-0.306787	0.999915
DNA helicase;DNA replication licensing factor MCM3	Q53HJ4;B2R7C5;A0A0S2Z4T1;P25205;A0A0S2Z492;Q8NHX6;B4DUQ9;J3KQ69;B4DS46	MCM3;HCC5	0.403223	0.999915
SH3 domain-binding glutamic acid-rich-like protein	V9HW48;O75368;D3DTE6	HEL-S-115;SH3BGRL	-0.473348	0.999915
NADH dehydrogenase [ubiquinone] flavoprotein 3, mitochondrial	P56181	NDUFV3	-0.195872	0.999915
Probable global transcription activator SNF2L1	Q86UA8;A0A0A0MRP6;B7ZLQ5;P28370;D7EZH4	SMARCA1	0.311169	0.999915
Transcription elongation factor SPT5	B4E0Q4;B4DZJ7;O00267;B4DJK4	SUPT5H	0.206796	0.999915
Dynactin subunit 4	A0A0S2Z5B8;A0A0S2Z5D4;Q9UJW0	DCTN4	-0.390154	0.999915
Cysteine and glycine-rich protein 3	A2TDB8;P50461	CSRP3	0.16633	0.999915
N-acylneuraminate cytidylyltransferase	Q8NFW8;Q53GF0	CMAS	-0.395768	0.999915
Microtubule-associated protein 1S;MAP1S heavy chain;MAP1S light chain	A8K940;Q66K74	MAP1S	0.276676	0.999915
NA	A0A0J9YXC7	NA	-0.170237	0.999915
Talin-2	Q9Y4G6;A0A1C7CYV7;A0A1B0GVU7;G1UI21;H0YMT1	TLN2	-0.32341	0.999915
Ras GTPase-activating protein-binding protein 1	Q6FI03;Q5U0Q1;Q13283;Q32P45;Q53HH4;B7Z8K4	G3BP;DKFZp686L1159;G3BP1	-0.17488	0.999915
Polymerase I and transcript release factor	Q6NZI2;B4DPZ5;B4DNU9;B3KRY5	PTRF	-0.163103	0.999915
Beta-adducin	Q05DK5;P35612	ADD2	0.410036	0.999915
Alpha-parvin	J3KNQ4;Q9NVD7;B7Z952;E9PS97	PARVA	0.301321	0.999915
Collagen alpha-1(VI) chain	A0A087X0S5;P12109;Q8TBN2	COL6A1	0.303939	0.999915
Nuclear ubiquitous casein and cyclin-dependent kinase substrate 1	Q9H1E3;B4DTY3;Q6IA16	NUCKS1;NUCKS	-0.171844	0.999915
Pre-mRNA-processing factor 19	Q9UMS4	PRPF19	0.159917	0.999915
Proteasome subunit beta type-5	P28074;A0A140VJS7	PSMB5	0.179486	0.999915
Serine/threonine-protein phosphatase CPPED1	Q9BRF8	CPPED1	0.363767	0.999915
Insulin-like growth factor 2 mRNA-binding protein 2	F8W930;Q9Y6M1;B4DKT5	IGF2BP2	0.171554	0.999915
39S ribosomal protein L9, mitochondrial	Q9BYD2;Q5SZR1	MRPL9	0.300261	0.999915
Splicing factor 3A subunit 2	Q05DF2;Q15428;K7EMT0	SF3A2	0.300566	0.999915
NA	Q53GN4;Q59ER5;Q53H17	WDR1	-0.129085	0.999915
Heme oxygenase 2	Q6IBP2;P30519;B3KSE0;A0A087WT44;I3L159;I3L1F5	HMOX2	-0.320623	0.999915
Leukocyte surface antigen CD47	A0A0A1TSG4;Q08722	CD47	0.176511	0.999915
NA	CON__P08727	NA	0.233187	0.999915
Adenylate cyclase type 5	O95622;B3KWA8;B7Z2C7	ADCY5	0.246137	0.999915
Mitochondrial import receptor subunit TOM70	O94826;B4DZ87;B3KQK5;B3KQK0	TOMM70A	-0.215327	0.999915
28S ribosomal protein S28, mitochondrial	A0A0S2Z5D2;A0A0S2Z563;A0A0S2Z5H0;Q9Y2Q9;H0YAT2;H7C5V3;Q53G62;E5RGC7;E5RFH3	MRPS28	0.238557	0.999915
Reticulocalbin-1	V9HW95;Q15293;Q5J7V8	HEL-S-84;RCN1	0.275963	0.999915
1,4-alpha-glucan-branching enzyme	Q04446;Q59ET0;E9PGM4;B4DUF1;B4DNJ3	GBE1	-0.123676	0.999915
Adenylate kinase isoenzyme 1	Q6FGX9;Q53EY8;Q5T9B7;P00568;H0Y4J6	AK1	0.2	0.999915
Medium-chain specific acyl-CoA dehydrogenase, mitochondrial	A0A0S2Z366;Q5T4U5;Q5HYG7;P11310;B7Z9I1;B4DWX6;B4DJE7;B4DVE0	ACADM;DKFZp686M24262	-0.188562	0.999915
Reticulon-4	Q9NQC3;Q53RF4	RTN4	-0.405249	0.999915
Dipeptidyl peptidase 3	Q5JPB8;G3V1D3;G3V180;Q9NY33;Q53HL4;Q53GT4;B4E357	DKFZp686O1117;DPP3	0.408879	0.999915
Nicotinate phosphoribosyltransferase	Q6XQN6;G5E977;C9J8U2	NAPRT	-0.245647	0.999915
Saccharopine dehydrogenase-like oxidoreductase	Q8NBX0	SCCPDH	-0.173242	0.999915
Trifunctional enzyme subunit beta, mitochondrial;3-ketoacyl-CoA thiolase	P55084;B4DY96;F5GZQ3;B4DDC9;B5MD38;D6W539	HADHB	-0.162883	0.999915
Nucleophosmin	A0A0S2Z4G7;A0A0S2Z491;P06748;A0A140VJQ2;A4ZU86;Q9BTI9	NPM1	-0.157375	0.999915
Splicing factor, proline- and glutamine-rich	Q86VG2;P23246;Q9BSV4;Q6PIX2	SFPQ	-0.144416	0.999915
Transmembrane emp24 domain-containing protein 2	B4DP27;Q6FHT8;Q15363;F5GX39;E7EQ72;B4E020	RNP24;TMED2	0.214317	0.999915
Kinectin	A0A024R663;Q86UP2	KTN1	0.237378	0.999915
Utrophin	P46939	UTRN	-0.251403	0.999915
Enoyl-CoA hydratase, mitochondrial	P30084	ECHS1	-0.157636	0.999915
Serine/threonine-protein phosphatase PGAM5, mitochondrial	Q96HS1	PGAM5	-0.142759	0.999915
Malonyl-CoA decarboxylase, mitochondrial	O95822	MLYCD	-0.173834	0.999915
Coiled-coil domain-containing protein 22	A0A024QZ03;O60826;B7ZAR0;B4DPB6	CCDC22	0.177437	0.999915
Apolipoprotein C-III	A3KPE2;B0YIW2;P02656	APOC3	-0.89856	0.999915
WD40 repeat-containing protein SMU1;WD40 repeat-containing protein SMU1, N-terminally processed	A0MNN4;Q2TAY7	SMU1	0.22585	0.999915
Paraplegin	Q9UQ90	SPG7	-0.179062	0.999915
Mimecan	Q7Z532;A8K0R3;B4DI63;P20774;Q5TBF5	OGN	-0.880412	0.999915
Septin-5	G3XAH0;Q59GE1;C9JM82;B4DJ62;X5DNA9;Q7KYV2;Q99648;Q99719;E7EPG2;E7EX32	SEPT5;CDCrel-1	-0.240497	0.999915
NA	F8W7C6;H7C123;H7C2C5	RPL10	-0.171163	0.999915
39S ribosomal protein L24, mitochondrial	Q96A35	MRPL24	0.169487	0.999915
Sodium/potassium-transporting ATPase subunit alpha-3	M0R116;Q53ES0;B7Z9V4;A0A0A0MT26;P13637;B7Z1Q9;B7Z3F8;B3KV59;B3KSY7	ATP1A3	-0.356273	0.999915
Desmin	Q53SB5;A5Z217;P17661;Q45VM8;Q45VM7;Q45VM6;Q9H319;L7RDA5;B4DUI0	tmp_locus_29;DES	0.168892	0.999915
Collagen alpha-1(II) chain;Collagen alpha-1(II) chain;Chondrocalcin	P02458	COL2A1	0.19942	0.999915
NADH dehydrogenase [ubiquinone] 1 subunit C2;NADH dehydrogenase [ubiquinone] 1 subunit C2, isoform 2	A0A024R5K6;O95298;E9PRJ5;E9PM14;A0A087WUM3;E9PQ53	NDUFC2;KCTD14;NDUFC2-KCTD14	-0.264832	0.999915
Ankyrin-3	Q12955;Q59G01	ANK3	-0.191532	0.999915
Double-strand break repair protein MRE11A	F8W7U8;A0A024R395;P49959;Q05D78	MRE11A	-0.288696	0.999915
Signal recognition particle 9 kDa protein	P49458	SRP9	0.205646	0.999915
Hsc70-interacting protein;Putative protein FAM10A5;Putative protein FAM10A4	B4E0U6;A0A140VKA6;P50502;Q1XBU6;B7ZA40;Q0IJ56;H7C3I1;Q8NFI4;Q3KNR6;Q8IZP2;F6VDH7	ST13;ST13P5;ST13P4	0.196038	0.999915
Probable ATP-dependent RNA helicase DDX23	B3KY11;A0A024R0Z3;Q9BUQ8;A8KA56	DDX23	0.337015	0.999915
ATP-binding cassette sub-family B member 10, mitochondrial	Q9NRK6;Q6ZMF8	ABCB10	-0.557475	0.999915
Glycerol-3-phosphate dehydrogenase;Glycerol-3-phosphate dehydrogenase, mitochondrial	Q53T76;A0A140VJK2;P43304;A8K1Z2;B7Z601	GPD2	-0.335034	0.999915
GMP synthase [glutamine-hydrolyzing]	B4DUT7;A0A140VJK6;P49915;Q53F90	GMPS	0.302492	0.999915
Pyruvate dehydrogenase protein X component, mitochondrial	O00330;B2R673	PDHX	-0.12028	0.999915
2-oxoisovalerate dehydrogenase subunit alpha, mitochondrial	Q59EI3;B2R8A9;A0A024R0K3;Q6ZSA3;F5H5P2;P12694;F5GXU9;Q658P7	BCKDHA;DKFZp313C0640	-0.183583	0.999915
Crk-like protein	P46109	CRKL	0.258275	0.999915
Serine/threonine-protein phosphatase;Serine/threonine-protein phosphatase 2A catalytic subunit alpha isoform	B3KUN1;P67775;Q6I9T8	PPP2CA	-0.199592	0.999915
NADH dehydrogenase [ubiquinone] flavoprotein 2, mitochondrial	Q6IPW4;Q6IB76;A8K750;E7EPT4;P19404;Q9UEH5	NDUFV2	-0.286758	0.999915
Inactive tyrosine-protein kinase 7	Q13308;Q59FV9	PTK7	-0.241996	0.999915
Probable ATP-dependent RNA helicase DDX5	B4DN41;J3KTA4;P17844;B5BUE6;B4DNG2;Q7Z2V5;Q59E92	DDX5;DKFZp686J01190	-0.212178	0.999915
28S ribosomal protein S14, mitochondrial	O60783;B2R4A5	MRPS14	-0.21826	0.999915
60S ribosomal protein L37a	C9J4Z3;P61513;G5E9R3;M0R0A1;Q6P4E4;E9PEL3;M0R2L6	RPL37A	-0.445046	0.999915
Ubiquinone biosynthesis protein COQ9, mitochondrial	A0A024R6U3;O75208;B4DIV2;H3BNT2;H3BPY0;H3BSJ5	hCG_2025883;COQ9	0.309156	0.999915
Omega-amidase NIT2	V9HW91;Q9NQR4	HEL-S-8a;NIT2	0.316804	0.999915
tRNA-splicing ligase RtcB homolog	Q9Y3I0	RTCB	0.146366	0.999915
Multifunctional methyltransferase subunit TRM112-like protein	A0A024R565;Q9UI30;F5GX77;F5GYQ2	HSPC152;TRMT112	-0.227584	0.999915
Small nuclear ribonucleoprotein Sm D2	P62316;K7ERG4	SNRPD2	0.157034	0.999915
Myosin-7	P12883;Q59EV3;Q5GJ54	MYH7	0.144047	0.999915
Fatty aldehyde dehydrogenase	P51648;J3QRD1;Q59H65;Q68D64;I3L1M4	ALDH3A2;DKFZp686E23276	-0.176015	0.999915
Lamin-B2	Q03252	LMNB2	-0.134411	0.999915
Heterogeneous nuclear ribonucleoprotein A1;Heterogeneous nuclear ribonucleoprotein A1, N-terminally processed;Heterogeneous nuclear ribonucleoprotein A1-like 2	F8W6I7;A0A024RB53;A0A024RAZ7;P09651;A0A024RC46;Q6IPF2;Q9BSM5;Q0VAC0;F8VZ49;A0A024QZ98;Q32P51;F8VTQ5;B4DP35;B4E0B5	HNRNPA1;HNRPA1;hCG_2020860;RP11-78J21.1;HNRNPA1L2	0.135928	0.999915
Cytochrome b-c1 complex subunit Rieske, mitochondrial;Cytochrome b-c1 complex subunit 11;Putative cytochrome b-c1 complex subunit Rieske-like protein 1	P47985;P0C7P4	UQCRFS1;UQCRFS1P1	-0.198583	0.999915
NA	A5YM51	MYH7	0.954681	0.999915
AFG3-like protein 2	D3DUJ0;Q8TA92;Q9Y4W6	AFG3L2	-0.151231	0.999915
Protein FAM98B	Q52LJ0	FAM98B	0.201447	0.999915
Far upstream element-binding protein 1	B4E0X8;E9PEB5;Q96AE4;B4DWL1;B4DT31;Q6PJY1;Q59FU3	FUBP1	-0.235611	0.999915
Nuclear cap-binding protein subunit 1	A0A024R179;Q09161	NCBP1	0.167274	0.999915
Coiled-coil domain-containing protein 124	A0A024R7M8;Q96CT7;M0R2F5	LOC115098;CCDC124	0.187896	0.999915
60S ribosomal protein L13a	Q5QTS3;P40429;Q9BSQ6;Q53H34;M0QYS1;Q8J015;Q0VGL3	RPL13A;RPL13a	-0.170843	0.999915
F-actin-capping protein subunit beta	P47756;B2R7T8;B1AK87;B1AK88;B4DWA6;B1AK85	CAPZB	0.149893	0.999915
Acyl-coenzyme A thioesterase 9, mitochondrial	Q9Y305;H7C5Q2	ACOT9	-0.143463	0.999915
Kinesin-like protein KIF13A	Q9H1H9;A0A1B0GUA8	KIF13A	-0.220716	0.999915
Beta-2-microglobulin;Beta-2-microglobulin;Beta-2-microglobulin form pI 5.3	B4E0X1;P61769;H0YLF3;A6XMH5;F5H6I0;A6XND9;A6XMH4	B2M	0.260034	0.999915
Bcl-2-associated transcription factor 1	E9PK09;E9PQN2;E9PKI6;E9PK91;Q9NYF8;Q6DCA8;E9PJA7	BCLAF1	0.312701	0.999915
Myoferlin	Q9NZM1;H0YD14	MYOF	-0.274365	0.999915
ATP-dependent RNA helicase DDX19A	I3L0H8;B4DS24;Q9NUU7	DDX19A	0.217751	0.999915
NA	A0A0D9SGF6;B4DGT1	SPTAN1	-0.0950689	0.999915
Histone-lysine N-methyltransferase SMYD1	Q8NB12;E9PHG3;Q5GJ33;Q5HYE8;Q5GJ32	SMYD1;DKFZp313O0925	-0.146891	0.999915
Serine/arginine-rich splicing factor 10	Q5JRI1;Q53GD7;A0A0S2Z504;O75494	SRSF10	0.252288	0.999915
Pleckstrin homology domain-containing family A member 5	A0A024RAY7;Q9HAU0;B4DHK5;A0JP02;B4DMB9;B4DJX4	PLEKHA5	-0.327895	0.999915
Protein SCO2 homolog, mitochondrial	O43819	SCO2	-0.212034	0.999915
Chromodomain-helicase-DNA-binding protein 4	B3KY63;F5GWX5;A0A0C4DGG9;Q14839	CHD4	0.30593	0.999915
SPRY domain-containing protein 4	Q8WW59;B4DUC9	SPRYD4	-0.253759	0.999915
Coronin	J3KSS5;J3QRV4	CORO6	0.274106	0.999915
RNA-binding protein Raly	Q53GL6;Q9UKM9;A8K4T9;Q5QPL9;Q5QPM1;B4DSJ1;Q5QPM0	RALY	0.196832	0.999915
Synaptosomal-associated protein;Synaptosomal-associated protein 23	A8K287;O00161;A0A024R9R8;H3BNE1;H3BR18;H3BM38;H3BPJ0	SNAP23	0.17157	0.999915
Serine/threonine-protein phosphatase 2A 65 kDa regulatory subunit A alpha isoform	A8K7B7;P30153;B4DDF7;A8K3H8;B4DE69;B4DQY1;Q8NB89;B3KQV6;C9J9C1	PPP2R1A	-0.161462	0.999915
NADH dehydrogenase [ubiquinone] 1 beta subcomplex subunit 10	A8K761;O96000;H3BPJ9;H3BV16	NDUFB10	0.119869	0.999915
NA	CON__P00761	NA	-0.634332	0.999915
Integrin alpha-V;Integrin alpha-V heavy chain;Integrin alpha-V light chain	A5YM53;L7RXH0;P06756	ITGAV	0.205071	0.999915
Signal peptidase complex subunit 2	B4DDB9;A0A087WUC6;E9PI68;Q15005;E9PL01	SPCS2	0.29722	0.999915
Rho GTPase-activating protein 1	Q07960;B4DPZ4;H0YE29	ARHGAP1	0.178703	0.999915
Thioredoxin-related transmembrane protein 4	Q9H1E5;E9PIN7	TMX4	0.395406	0.999915
Voltage-dependent anion-selective channel protein 3	Q9Y277;E5RJN6;E5RHZ6	VDAC3	0.148185	0.999915
Ras-related protein Rab-5A	A0A024R2K1;P20339;A0A0A1HAN9	RAB5A	0.204356	0.999915
Sodium/potassium-transporting ATPase subunit beta-3	P54709;D3DNF9;Q58I18	ATP1B3	0.345798	0.999915
Filamin-C	Q14315	FLNC	0.121397	0.999915
Adenylyl cyclase-associated protein 2;Adenylyl cyclase-associated protein	P40123;Q5JPJ8;A0A087X0J3;A0A087WZ15;E9PDI2;B7Z4M3;B7Z385	CAP2;DKFZp686D0714	-0.189623	0.999915
Phosphatidylinositide phosphatase SAC1	Q9NTJ5;E9PGZ4;B4DVV3	SACM1L	-0.21706	0.999915
Tubulin alpha-1A chain;Tubulin alpha-3C/D chain;Tubulin alpha-3E chain	Q71U36;B4DQK4;Q1ZYQ1;Q13748;Q9UQM3;F8VQQ4;Q6PEY2	TUBA1A;TUBA2;TUBA3C;TUBA3E	0.211071	0.999915
Poly(A) RNA polymerase, mitochondrial	Q9NVV4	MTPAP	-0.19696	0.999915
Pre-mRNA-splicing factor ATP-dependent RNA helicase DHX15	B4E0S6;O43143	DHX15	0.183232	0.999915
Heterogeneous nuclear ribonucleoprotein H;Heterogeneous nuclear ribonucleoprotein H, N-terminally processed	G8JLB6;P31943;E9PCY7;D6RIT2;D6RIU0;D6RBM0;E7EQJ0;D6RAM1;D6R9T0;D6RFM3;D6RDU3;D6RJ04;D6RIH9	HNRNPH1	-0.168205	0.999915
14 kDa phosphohistidine phosphatase	V9HWC4;Q9NRX4;Q6FIE5	HEL-S-132P;PHPT1;PHP14	0.171922	0.999915
NA	B9EH95;Q8NAH4	ARVCF	0.185496	0.999915
Inter-alpha-trypsin inhibitor heavy chain H1	B7Z539;B7Z549;P19827;F8WAS2	ITIH1	-0.460789	0.999915
Lipoamide acyltransferase component of branched-chain alpha-keto acid dehydrogenase complex, mitochondrial	P11182;B4E1Q7;Q5VVL7	DBT	-0.161022	0.999915
40S ribosomal protein S3	P23396;Q53G83;E9PL09;E9PPU1;H0YEU2;F2Z2S8;H0YCJ7;Q9NQS8;H0YF32	RPS3	-0.11341	0.999915
Serine protease HTRA1	Q92743;Q05DJ8;B3KRN4	HTRA1	0.222775	0.999915
Dolichyl-diphosphooligosaccharide--protein glycosyltransferase subunit 1	Q6IBR0;P04843;Q96HX3;Q53EP4;B4DL99;B7Z4L4;B4DNJ5	RPN1	-0.111829	0.999915
NADH-ubiquinone oxidoreductase chain 4	A0A075X8B5;H9E785;A0A059QSR8;A0A141ZSL4;A0A141ZQA8;Q1ZY32;X5CDJ3;X5BLB3;V9N9T2;V9N9H0;V9N518;V9JFH6;V9J5G3;V9J548;V9J0Z6;V9IZQ9;V5JGF7;U5ZDA5;U5YXJ5;U5YT86;U3LDR4;U3LCU1;U3L9L1;U3L8Y8;U3L8P3;U3L6U8;U3L6N6;U3L6H7;T2HMQ7;T1Q5B1;T1Q517;S5RPJ8;S5RLC1;S4UQT8;R9Y4Q4;R9Y4D9;R9Y457;R9Y323;R9Y2B9;R9Y0J8;Q9T9Y1;Q9B2Y7;Q9B2Y5;Q9B2X8;Q9B2X6;Q9B2W5;Q9B2W2;Q9B1S7;Q9B188;Q9B0T8;Q8WCZ0;Q8WCY0;Q8W8T1;Q8HNR0;Q8HG2…	ND4;ndh4;NADH4;MT-ND4	-0.213817	0.999915
Gamma-sarcoglycan	B2RE70;A8K3K5;Q13326	SGCG	-0.627644	0.999915
NA	Q6ZR64;K7EQX8	MXRA7	-0.121238	0.999915
Ubiquitin carboxyl-terminal hydrolase;Ubiquitin carboxyl-terminal hydrolase 7	Q6U8A4;Q93009;B7Z855;B7ZAX6;H3BND8;B7Z7T5	USP7	0.308086	0.999915
Glycogen debranching enzyme;4-alpha-glucanotransferase;Amylo-alpha-1,6-glucosidase	A0A0S2A4E4;P35573;A0A0M4G3H8;G1UI17	AGL	0.0981123	0.999915
Guanine nucleotide-binding protein G(I)/G(S)/G(O) subunit gamma-12;Guanine nucleotide-binding protein subunit gamma	Q9UBI6;Q53GD1	GNG12	-0.177889	0.999915
NADH dehydrogenase [ubiquinone] iron-sulfur protein 3, mitochondrial	O75489;Q53FM7;Q9UF24	NDUFS3;DKFZp586K0821	-0.195617	0.999915
Carbonyl reductase [NADPH] 1	P16152;E9PQ63;A8MTM1	CBR1	0.246709	0.999915
Glycogenin-1	B2R5R5;P46976;G5E9W8;B4DSX6;C9JQ42;Q8N5Y3	GYG1	-0.11872	0.999915
Cytoplasmic FMR1-interacting protein 2	E7EVJ5;B7Z4I3;B7Z8N7;Q96F07;H7C229;E7EW33;B7Z217;B7Z3H2;Q9NSN1	CYFIP2;DKFZp761H087	-0.173057	0.999915
RNA-binding protein FUS	Q59H57;B4DR70;A8K4H1;Q8TBR3;Q6IBQ5;H3BPE7;Q13344;P35637;Q70T18	FUS	-0.204671	0.999915
Fragile X mental retardation syndrome-related protein 1	A0A0F7KYT8;A0A0F7L1S3;P51114;A0A0F7L0Q8;B4DXZ6;E9PFF5;B4DM21;B4DM78;E7EU85;B4DGH9	FXR1	-0.157235	0.999915
Ubiquitin carboxyl-terminal hydrolase 5	A0A140VJZ1;P45974	USP5	0.156596	0.999915
Serine beta-lactamase-like protein LACTB, mitochondrial	P83111	LACTB	-0.14467	0.999915
Myopalladin	Q86TC9;A0A087WX60	MYPN	0.23424	0.999915
Isochorismatase domain-containing protein 1	Q96CN7;D6RGE2;Q9Y3B5	ISOC1	-0.136863	0.999915
Phosphoenolpyruvate carboxykinase [GTP], mitochondrial	Q6IB91;A0A0S2Z430;Q16822;H0YML5;B4DW73;A0A0A0MS74;A0A0S2Z451;H0YM31	PCK2	-0.145114	0.999915
14-3-3 protein beta/alpha;14-3-3 protein beta/alpha, N-terminally processed	V9HWD6;P31946;B5BU24	HEL-S-1;YWHAB	0.242767	0.999915
Guanine nucleotide-binding protein G(I)/G(S)/G(T) subunit beta-1	B2R6K4;A0A024R056;P62873;F6UT28;B1AKQ8;F6X3N5	GNB1	0.420322	0.999915
Myosin regulatory light polypeptide 9	Q6IBG1;P24844	MYL9	0.227719	0.999915
Myosin-9	A0A024R1N1;P35579;Q86XU5	MYH9	-0.134224	0.999915
Endoplasmic reticulum resident protein 29	V9HW71;P30040;F8VY02	HEL-S-107;ERP29	0.183136	0.999915
Glutathione peroxidase;Glutathione peroxidase 1	A0A087WUQ6;Q7L4Q3;P07203;Q6NSD4	GPX1	0.14986	0.999915
Programmed cell death 6-interacting protein	Q8WUM4;Q4W4Y1;B4DHD2;B7Z5C1	PDCD6IP;DRIP4	0.144182	0.999915
60S ribosomal protein L7a	P62424;Q5T8U3	RPL7A	-0.127282	0.999915
Cytochrome c oxidase subunit 5B, mitochondrial	P10606;Q6FHM4;Q6FHJ9	COX5B	-0.193044	0.999915
Ras-related protein Ral-A	P11233;H7C3P7	RALA	0.184235	0.999915
40S ribosomal protein S2	P15880;Q3KQT6;Q8N5L9;Q6IPX5;H0YEN5;Q8J014;E9PQD7;E9PMM9;I3L404;E9PPT0;Q8NI61;E9PM36	RPS2;rps2;OK/KNS-cl.7	0.142023	0.999915
Collagen alpha-3(VI) chain	D9ZGF2;P12111	COL6A3	-0.303607	0.999915
Catenin alpha-1	P35221;B4E2G8;G3XAM7;B4DU00;B4DKT9;B3KSR8	CTNNA1	0.134855	0.999915
L-lactate dehydrogenase;L-lactate dehydrogenase A chain	V9HWB9;P00338;B4DJI1;F5GYU2;F5GXY2	HEL-S-133P;LDHA	0.133396	0.999915
Band 4.1-like protein 3;Band 4.1-like protein 3, N-terminally processed	A0A0A0MRA8;Q9Y2J2;A0A0A0MSA4;A0A1B0GTF8;B7Z8M8	EPB41L3	0.192086	0.999915
Insulin-like growth factor 2 mRNA-binding protein 3	O00425	IGF2BP3	-0.27612	0.999915
Prohibitin	Q6PUJ7;A8K401;P35232;Q6FHP5;Q53FV0;C9JW96;C9JZ20;E7ESE2;E9PCW0	HEL-S-54e;PHB	-0.114217	0.999915
Adenylosuccinate synthetase isozyme 1	Q8N142	ADSSL1	-0.124472	0.999915
Septin-7	Q8TC62;E7ES33;Q3LIE9;A4GYY8;E7EPK1;Q16181;B4DUD6;A8K3D0;Q59EY4	SEPT7;Nbla02942;DKFZp686F17268	0.188039	0.999915
Dihydropyrimidinase-related protein 4	O14531;D3DRG7;Q5T0Q6	DPYSL4	0.190984	0.999915
Tyrosine-protein phosphatase non-receptor type substrate 1;Signal-regulatory protein beta-1 isoform 3	P78324;B4DP97;D3DVW9;Q5TFQ8	SIRPA;PTPNS1;SIRPB1	-0.178562	0.999915
Putative elongation factor 1-alpha-like 3;Elongation factor 1-alpha;Elongation factor 1-alpha 1	Q5VTE0;Q6IPT9;Q6IPS9;Q6IPN6;Q53HM9;P68104;A8K9C4;Q53HR5;Q53HQ7;Q53GA1;Q53G85;Q96RE1;A0A087WVQ9;B4DV42;A0A087WV01;Q9H2I7;Q53G89;Q8IUB0;Q53HR1;B4DNE0;Q504Z0;B4E2C5;Q16577	EEF1A1P5;EEF1A1;EEF1A1L14;PTI-1	0.094827	0.999915
Nucleobindin-2;Nesfatin-1	E9PKG6;V9HW75;A0A087WSV8;P80303;Q2L696;E9PLR0;E9PLE9	NUCB2;HEL-S-109;Nucb2	-0.298578	0.999915
Peptidyl-prolyl cis-trans isomerase;Peptidyl-prolyl cis-trans isomerase F, mitochondrial	B2R6X6;A0A024QZS4;P30405	PPIF	0.145093	0.999915
Vacuolar protein sorting-associated protein 13C	Q709C8	VPS13C	-0.342178	0.999915
TOM1-like protein 2	Q6ZVM7;B7Z8F0;B7Z2U2	TOM1L2	0.296723	0.999915
Ig kappa chain C region	Q0KKI6;Q8TCD0;Q5EFE6;Q7Z3Y4;Q6GMX0;P01834;A0A075B6H6	IGKC	-0.597997	0.999915
Very long-chain specific acyl-CoA dehydrogenase, mitochondrial	P49748;Q53HR2;B4DEA8;B3KPA6;B3KPX1	ACADVL	-0.142634	0.999915
Phosphate carrier protein, mitochondrial	Q8NCF7;B2RE88;A0A024RBE8;A0A024RBH9;Q00325;F8VVM2;Q53HC3	SLC25A3	-0.113768	0.999915
Serine/threonine-protein kinase Nek9	A0A024R6D1;Q8TD19	NEK9	0.155221	0.999915
Myosin regulatory light chain 2, ventricular/cardiac muscle isoform	Q6IB42;P10916;Q14908;Q7Z3Z1;G3V1V8	MYL2	0.14264	0.999915
26S proteasome non-ATPase regulatory subunit 9	J3KN29;O00233;F5H5V4;F5GX23;F5H169	PSMD9	0.322974	0.999915
Cysteine and glycine-rich protein 1	B4DY28;P21291;Q9BTA4;B3KVC9;Q6ZMS3;B4E2T4;E9PND2;E9PS42;Q59EQ5;E9PP21;Q6AI18	CSRP1;DKFZp686M148	0.365566	0.999915
Phosphomevalonate kinase	Q6FGV9;Q15126	PMVK	0.292496	0.999915
Proteasome subunit alpha type-1;Proteasome subunit alpha type	P25786;V9HW55;F5GX11;B4E0X6;B4DEV8	PSMA1;HEL-S-275	0.137675	0.999915
Splicing factor 3B subunit 2	Q13435;E9PPJ0;Q7Z3K9;E9PJ04;H0YCG1	SF3B2;DKFZp781L0540	0.1942	0.999915
Vacuolar protein sorting-associated protein 4A	I3L4J1;A0A024R705;Q9UN37;Q9NXK5;Q9UF30	VPS4A;DKFZp434E0418	-0.17152	0.999915
Translocon-associated protein subunit gamma	C9JA28;Q9UNL2	SSR3	-0.336891	0.999915
RNA-binding protein 20	Q5T481	RBM20	0.325452	0.999915
DNA replication licensing factor MCM4	B4DLA6;B3KMX0;A0A024R7U6;P33991	MCM4	0.200512	0.999915
Synaptogyrin;Synaptogyrin-2	A0A024R8T9;O43760;K7ELD9;K7ENG9;K7ELS8	SYNGR2	0.274751	0.999915
Tubulin--tyrosine ligase-like protein 12	A0A024R4U3;Q14166	TTLL12	-0.283196	0.999915
3-mercaptopyruvate sulfurtransferase;Sulfurtransferase	A0A140VJX3;P25325;Q2VEU1;B1AH49;Q59HD5	MPST	-0.15092	0.999915
Persulfide dioxygenase ETHE1, mitochondrial	A0A0S2Z580;A0A0S2Z5B3;M0QXB5;O95571;B2RCZ7;A0A0S2Z5N8	ETHE1	-0.182732	0.999915
60S ribosomal protein L9	D6RAN4;Q53Z07;P32969;H0Y9V9;B4E1M5;E7ESE0;B4DLV8	RPL9	0.177063	0.999915
Junctophilin-2	Q9BR39;B4E3T9;Q86VZ3	JPH2	-0.314758	0.999915
Aldehyde dehydrogenase X, mitochondrial	P30837	ALDH1B1	0.141873	0.999915
NAD-dependent malic enzyme, mitochondrial	P23368	ME2	-0.147503	0.999915
ADP-ribosylation factor 6	Q5U025;P62330;Q6FH17	ARF6	-0.214198	0.999915
Serine--tRNA ligase, mitochondrial	M0QWZ7;Q9NP81;M0R2C6;B4DXB9;M0R259;A0A024R0H0	SARS2	0.28189	0.999915
KN motif and ankyrin repeat domain-containing protein 2	Q63ZY3	KANK2	-0.23275	0.999915
Thioredoxin domain-containing protein 12	O95881	TXNDC12	0.221993	0.999915
Structural maintenance of chromosomes protein 1A;Structural maintenance of chromosomes protein	Q14683;G8JLG1;Q6P2R1;A8K7A6;Q6MZR8;B7Z709	SMC1A;DKFZp686L19178	0.191239	0.999915
Myosin light polypeptide 6	F8W1R7;G3V1V0;P60660;J3KND3;G8JLA2;B7Z6Z4;G3V1Y7;F8VPF3;Q6IBG5;F8VZU9;F8W180	MYL6	-0.171968	0.999915
GTP-binding protein SAR1b	Q53F37;Q9Y6B6;D6RD69;Q9H029;D6RDB2	SAR1B;DKFZp434B2017	0.227937	0.999915
ATP-dependent (S)-NAD(P)H-hydrate dehydratase	B4DKX7;A0A024RDX4;Q8IW45;B3KSJ9	CARKD;FLJ10769	-0.217741	0.999915
mRNA export factor	P78406;Q5J8M4;E9PQ57;E9PPG9	RAE1	0.142326	0.999915
Adenine phosphoribosyltransferase	P07741;H3BQZ9;H3BQF1;H3BQB1;H3BSW3	APRT	0.24061	0.999915
SUN domain-containing protein 1	E9PHI4;A0A146IHP0;A4D2Q0;O94901;A7MCZ7;H0Y6N5;H0Y742;B4E278;H7C2K3	SUN1;UNC84A	-0.178105	0.999915
Protein SET;Protein SETSIP	A0A0C4DFV9;B2RCX0;A0A024R895;Q5VXV3;Q01105;A0A087X027;P0DME0	SET;SETSIP	-0.125012	0.999915
NA	G1UI22;A8MQ02	MLLT4	0.228292	0.999915
Xaa-Pro aminopeptidase 1	Q9NQW7;Q5T6H7;B3KSI7	XPNPEP1	0.212895	0.999915
Constitutive coactivator of PPAR-gamma-like protein 1	Q9NZB2	FAM120A	0.218704	0.999915
Acyl-CoA-binding protein	P07108;B8ZWD1;A0A024RAF2;A0A0A0MTI5;B8ZWD9;B8ZWD8	DBI	-0.208846	0.999915
Myocardial zonula adherens protein	A0A024R5W4;P0CAP1;H8Y6P7	hCG_40688;MYZAP;GCOM1	0.2617	0.999915
Tripartite motif-containing protein 55	Q9BYV6	TRIM55	0.286398	0.999915
ATP synthase subunit e, mitochondrial	P56385	ATP5I	0.181033	0.999915
Heat shock protein HSP 90-alpha	K9JA46;P07900;Q2VPJ6;Q8TBA7;Q86U12;O75322;Q96HX7	EL52;HSP90AA1	-0.0899832	0.999915
Monofunctional C1-tetrahydrofolate synthase, mitochondrial	A0A087WVM4;B7ZM99;Q6UB35;B2RD24	MTHFD1L	0.221497	0.999915
NA	Q6MZS5	DKFZp686A13234	0.273075	0.999915
General transcription factor II-I	X5D2J9;Q499G6;X5D939;X5DNP5;A8K9W7;X5DR09;P78347;B4DH52;B4DRA9	GTF2I	-0.211782	0.999915
MICOS complex subunit MIC27	A0A087WUX8;A0A087WYF7;Q6UXV4;Q68DW4	APOOL;DKFZp779P1227	-0.144584	0.999915
Ras-related protein Rab-5C	A0A024R1U4;P51148;K7ERI8;F8VVK3;K7ENY4	RAB5C	0.40837	0.999915
Mitochondrial import receptor subunit TOM22 homolog	Q549C5;Q9NS69;Q53GB0	MST065;TOMM22	0.22444	0.999915
Ethylmalonyl-CoA decarboxylase	Q9NTX5;H0Y5L2	ECHDC1	0.207522	0.999915
Protein quaking	Q96PU8;H0YG47	QKI	-0.184368	0.999915
RNA-binding protein 10	A0A0S2Z4X1;A0A0S2Z4W4;Q7Z3D7;A0A0A0MR66;P98175;Q6PKH5	DKFZp686E2459;RBM10	-0.287491	0.999915
Protein disulfide-isomerase TMX3	Q3B7X1;Q96JJ7	TMX3	-0.21983	0.999915
Troponin C, slow skeletal and cardiac muscles	Q6FH91;P63316	TNNC1	0.179717	0.999915
Protein FAM49B	A0A024R9G4;Q9NUQ9;Q68D08	FAM49B;DKFZp686B04128	-0.24677	0.999915
Dihydropyrimidinase-related protein 3	A0A140VK07;Q6DEN2;Q14195;Q8IXW6	DPYSL3	-0.140878	0.999915
Stress-induced-phosphoprotein 1	V9HW72;A8K690;P31948	HEL-S-94n;STIP1	-0.147774	0.999915
Signal recognition particle 54 kDa protein	B4DDS7;P61011;G3V4F7	SRP54	-0.242269	0.999915
UDP-glucose:glycoprotein glucosyltransferase 1	A8KAK1;Q9NYU2	UGGT1	-0.211146	0.999915
NA	V9HVZ7	HEL-176	0.342967	0.999915
Rab GDP dissociation inhibitor beta	Q6IAT1;B4DLV7;P50395	GDI2	-0.131478	0.999915
Glutathione peroxidase;Glutathione peroxidase 3	A0A087X1J7;P22352	GPX3	-0.60754	0.999915
39S ribosomal protein L44, mitochondrial	A0A024R473;Q9H9J2	MRPL44	-0.212979	0.999915
Superoxide dismutase [Cu-Zn]	V9HWC9;P00441;H7BYH4	HEL-S-44;SOD1	-0.226315	0.999915
Septin-11	D6RGI3;D6RER5;Q9NVA2;D6RDU5;H0Y961	43354	-0.192575	0.999915
Methionine-R-sulfoxide reductase B3	F5H7C4;F5H6G9;F5H199;H0YFW5;Q8IXL7;H7C2B7	MSRB3	0.442207	0.999915
Peroxisomal multifunctional enzyme type 2;(3R)-hydroxyacyl-CoA dehydrogenase;Enoyl-CoA hydratase 2	B2R659;A0A0S2Z4J1;P51659;E7EWE5;B4DSD0;B4DDM5;E7ER27;G5E9S2;E7ET17;B4DI68;B3KSP2	HSD17B4	-0.144836	0.999915
Leucine-rich repeat-containing protein 47	A0A024R4G1;Q8N1G4	LRRC47	0.109431	0.999915
NA	Q59FT7	NA	-0.165147	0.999915
Metastasis-associated protein MTA2	A0A024R534;O94776	MTA2	0.195096	0.999915
Coronin;Coronin-7	A0A0A6YYL4;P57737;B3KUH7;B3KSY4;B4DKU9	CORO7-PAM16;CORO7;hCG_1787779	-0.223043	0.999915
Ras-related protein Rab-35	Q15286;F5H157	RAB35	0.218321	0.999915
NA	H0YJ34;A0A0U1RRM8	FERMT2	0.193064	0.999915
Fibulin-2	Q86V58;B7Z9B8;P98095;B7Z6T9;Q9Y3V7	FBLN2;DKFZp586A1519	-0.352789	0.999915
Transcriptional activator protein Pur-alpha	Q2NLD4;Q2NLC9;Q56A79;Q00577	PURA	0.273226	0.999915
NA	NA	NA	0.175869	0.999915
NA	A0A024R674	SPTB	-0.159521	0.999915
Serine/threonine-protein phosphatase 2A 55 kDa regulatory subunit B;Serine/threonine-protein phosphatase 2A 55 kDa regulatory subunit B alpha isoform	Q56VW8;A0A140VJT0;P63151	PPP2R2A	0.281406	0.999915
V-type proton ATPase catalytic subunit A	P38606;B7Z2V6	ATP6V1A	0.225945	0.999915
RNA-binding protein EWS	B0QYK0;Q01844;H7BY36;A0A0D9SFL3;C9JGE3	EWSR1	-0.243045	0.999915
Sodium/potassium-transporting ATPase subunit beta-2	P14415;I3L3J8	ATP1B2	-0.238986	0.999915
60S ribosomal protein L31	B2R4C1;P62899;H7C2W9;C9JU56;B7Z4E3;B7Z4C8;B8ZZK4	RPL31	-0.178901	0.999915
Cullin-1	B4DLA3;A0A0C4DGX4;A0A090N7U0;Q13616;Q75MQ1;B3KTW0	CUL1	-0.18888	0.999915
WD repeat-containing protein 44	Q5JSH3;Q8N397;H7BY83;B7Z947	WDR44;DKFZp761M142	0.30693	0.999915
Pantothenate kinase 4	Q9NVE7;A0A0G2JR38;B4DHW9;E9PHT6;B4DZX1;Q7RTX2	PANK4	0.203245	0.999915
Junction plakoglobin	A0A0S2Z487;A0A024R1X8;P14923	JUP	0.115526	0.999915
Serine/threonine-protein kinase 26;Serine/threonine-protein kinase 25	Q8NBY1;Q499L9;B4E0Y9;Q9P289;Q9NWX4;C9JDH9;C9J6L2;C9JCC0;C9J232;H7C279;Q5CZ67;B4E185;B3KRS6;A0A0S2Z4Y2;B4DVS7;Q96BA2;A0A024R4B2;O00506	STK26;MST4;STK25;DKFZp686J1430	-0.326603	0.999915
Glutaryl-CoA dehydrogenase, mitochondrial	A0A024R7F9;Q92947;B4DK85;B4DUY0	GCDH	0.204414	0.999915
Clathrin light chain B	A0A024R7S3;P09497	CLTB	0.316542	0.999915
Dynactin subunit 1	E7EX90;Q14203;Q6MZZ3;Q6AWB1;Q6AWB3	DCTN1;DKFZp686I0746;DKFZp686E0752;DKFZp686E191	0.160635	0.999915
Double-strand-break repair protein rad21 homolog	A0A024R9J0;O60216	RAD21	-0.273028	0.999915
Signal recognition particle receptor subunit alpha	P08240;Q6IAX9;A0A024R3M0	SRPR	-0.185163	0.999915
28S ribosomal protein S36, mitochondrial	P82909	MRPS36	-0.115944	0.999915
28S ribosomal protein S34, mitochondrial	C9JJ19;P82930;A4UCR9	MRPS34	0.266339	0.999915
Galactokinase	V9HWE7;P51570;Q6ZP37;Q71UH7;K7ERJ9;B4E1A8	HEL-S-19;GALK1	-0.19938	0.999915
Starch-binding domain-containing protein 1	O95210;B3KMK8;B4DK68	STBD1	0.269626	0.999915
NA	B3KW79	NA	-0.177891	0.999915
Serine-threonine kinase receptor-associated protein	Q9Y3F4;B0AZV0	STRAP	0.156325	0.999915
Eukaryotic translation initiation factor 3 subunit E	Q6IAX5;P60228;B2R806;B3KW56;E5RGA2	EIF3E	-0.297794	0.999915
Complex I assembly factor TIMMDC1, mitochondrial	Q9NPL8;C9JU35;G3XA94	TIMMDC1	0.152271	0.999915
60S ribosomal protein L3	P39023;Q8TBW1;Q96QL0;B3KS36;Q9NY85;G5E9G0;Q49AJ9;Q9BT63;B5MCW2;H7C422;H7C3M2	RPL3;rpl3	-0.110499	0.999915
Ras suppressor protein 1	Q32Q10;Q15404;B0YJ73	RSU1	-0.222042	0.999915
DNA helicase;DNA replication licensing factor MCM7	B2RBA6;A0A0S2Z4A5;P33993;C6EMX8;B3KUD7	MCM7	-0.182188	0.999915
Heterogeneous nuclear ribonucleoprotein H3	Q53F48;A0A024QZK8;P31942;B4DHY1;A0A024QZP1	HNRPH3;HNRNPH3	-0.234906	0.999915
Lanosterol 14-alpha demethylase	B3KRC6;A0A0C4DFL7;Q16850;Q05D40	CYP51A1	0.319901	0.999915
Transmembrane protein 43	A0A024R2F9;Q9BTV4;A0A0S2Z5N2;Q8TEP9	TMEM43;FLJ00144	0.351595	0.999915
V-type proton ATPase subunit B, brain isoform	A0A140VK65;P21281;Q59HF3;H0YC04	ATP6V1B2	0.148219	0.999915
Fatty acid-binding protein, heart	S4R371;P05413;Q6IBD7;S4R3A2	FABP3	0.118121	0.999915
Protein NipSnap homolog 2	O75323	GBAS	-0.176433	0.999915
FACT complex subunit SPT16	Q9Y5B9	SUPT16H	-0.375373	0.999915
39S ribosomal protein L37, mitochondrial	Q9BZE1;S4R369	MRPL37	0.133117	0.999915
Amine oxidase [flavin-containing] B	Q8TBI1;P27338;B7Z242	MAOB	-0.147073	0.999915
CDGSH iron-sulfur domain-containing protein 2	Q8N5K1;I3L1N9	CISD2	-0.183104	0.999915
Importin subunit alpha-3	O00629	KPNA4	0.263237	0.999915
BolA-like protein 2	Q9H3K6;A0A087WZT3	BOLA2	-0.165246	0.999915
Keratin, type I cytoskeletal 18	B2RA03;A0A024RAY2;P05783;F8VZY9;I6L965	KRT18	-0.139807	0.999915
Eukaryotic translation initiation factor 4H	Q15056;Q75MU1;B4DMV6;Q75MU2;A4D198	EIF4H;WBSCR1;LOC392647	0.133656	0.999915
Kinesin light chain 1	Q7RTQ9;Q7RTQ7;G5E9S8;G3V2E7;B5BU63;Q7RTQ8;Q7RTQ2;G3V3H3;Q7RTQ1;Q7RTQ0;G3V5R9;Q7RTP8;E7EVH7;Q07866;F8W6L3;B4DGB3;Q7RTQ4;B4DS14;Q7Z5D5	KNS2;KLC1	0.286554	0.999915
Serine/threonine-protein phosphatase;Serine/threonine-protein phosphatase PP1-beta catalytic subunit	V9HW04;P62140;B7ZB67;B4DJ75;E7ETD8	HEL-S-80p;PPP1CB	0.158923	0.999915
Heterogeneous nuclear ribonucleoprotein M	P52272;A0A087X0X3;Q59ES8;Q7KYM9	HNRNPM;ORF	-0.103908	0.999915
AP-3 complex subunit beta-1;AP-3 complex subunit beta	A0A0S2Z5J4;O00203;A8K586;Q3MNE1;A0A0S2Z4Z4;B4E0B2	AP3B1	0.154798	0.999915
Lysosome membrane protein 2	A0A024RDG6;Q14108	SCARB2	-0.187737	0.999915
Nucleolar protein 58	Q9Y2X3;B3KN82	NOP58	-0.157968	0.999915
60S ribosomal protein L7	P18124;A0A024R814;A8MUD9	RPL7	-0.111169	0.999915
Procollagen-lysine,2-oxoglutarate 5-dioxygenase 1	A0A024R4H0;Q02809;B2R5M9;B4DGN8;B4DHT1	PLOD1	-0.21157	0.999915
EPM2A-interacting protein 1	Q7L775	EPM2AIP1	0.265363	0.999915
Heterogeneous nuclear ribonucleoprotein A/B	D6R9P3;D6RD18;B4DMY3;D6RBZ0;Q53F64;Q99729	HNRNPAB	0.260191	0.999915
Annexin;Annexin A7	B2R657;B4DT77;B4DWU2;B4DHY4;Q53HM8;P20073;B2R7L2	ANXA7	-0.177892	0.999915
Phosphorylase b kinase regulatory subunit alpha, liver isoform	P46019	PHKA2	0.123709	0.999915
NA	G3V325;B4DJ38;C9JJT5	ATP5J2-PTCD1	-0.260392	0.999915
40S ribosomal protein S10;Putative 40S ribosomal protein S10-like	P46783;Q59GE4;F6U211;Q9NQ39	RPS10;RPS10P5	0.14505	0.999915
Serine/threonine-protein phosphatase 2B catalytic subunit alpha isoform;Serine/threonine-protein phosphatase	A0A0S2Z4C6;Q08209;A0A0S2Z4B5;E7ETC2;Q9UMM5	PPP3CA	0.217946	0.999915
Lactoylglutathione lyase	X5DNM4;V9HW62;Q04760	GLO1;HEL-S-74	0.126535	0.999915
Signal recognition particle subunit SRP72	Q86X80;A0PJJ5;Q0D2M6;V9HWK0;O76094;R4GNC1	SRP72;HEL103	0.250583	0.999915
ERO1-like protein alpha	Q96HE7	ERO1L	0.18073	0.999915
Eukaryotic translation initiation factor 3 subunit A	J9R021;Q14152;Q24JU4;Q7Z5T5;Q6P1R0	eIF3a;EIF3A	-0.220806	0.999915
Barrier-to-autointegration factor;Barrier-to-autointegration factor, N-terminally processed	A0A024R5H0;O75531;B2R4V4	BANF1	0.335085	0.999915
Wolframin	A0A0S2Z4V6;O76024	WFS1	0.400192	0.999915
Membrane-associated progesterone receptor component 2	O15173	PGRMC2	0.102327	0.999915
Matrix metalloproteinase-15	A0A024R6U8;P51511;Q7KZY0	MMP15	-0.280465	0.999915
2,4-dienoyl-CoA reductase, mitochondrial	A0A024R9D7;Q16698	DECR1	-0.143507	0.999915
Protein S100;Protein S100-A11;Protein S100-A11, N-terminally processed	V9HWH9;P31949;B2R5H0	HEL-S-43;S100A11	-0.215593	0.999915
NEDD8-activating enzyme E1 regulatory subunit	Q13564	NAE1	-0.169541	0.999915
Coatomer subunit beta	P53618;E9PP73	COPB1	-0.16509	0.999915
Fibronectin;Anastellin;Ugl-Y1;Ugl-Y2;Ugl-Y3	A0A024R462;B7ZLE5;P02751;Q6MZM7;Q6N084;Q68CX6	FN1;DKFZp686O12165;DKFZp686L11144;DKFZp686O13149	-0.133337	0.999915
Calmegin	A8K454;A0A140VKG2;O14967;D6RAZ4;B4DRG2	CLGN	0.157457	0.999915
Retinol-binding protein 1	P09455;A0A0A0MTB9;H0YAK8;A0A0A0MQT0	RBP1	0.163993	0.999915
Potassium/sodium hyperpolarization-activated cyclic nucleotide-gated channel 4	Q9Y3Q4	HCN4	0.312465	0.999915
Transducin beta-like protein 2	E9PF19;B4DY50;A0A0S2Z5F3;Q8N2L6;B2RB52;Q9Y4P3;B4DY59;Q96E41	TBL2	-0.158497	0.999915
Protein DEK	P35659;B4DNW3;B4DFG0;D6RDA2	DEK	0.154378	0.999915
Golgin subfamily A member 3	Q08378	GOLGA3	-0.161368	0.999915
Putative peptidyl-tRNA hydrolase PTRHD1	Q6GMV3	PTRHD1	0.221366	0.999915
NA	Q71U02	NA	-0.287171	0.999915
28S ribosomal protein S5, mitochondrial	P82675	MRPS5	0.149347	0.999915
Endothelial differentiation-related factor 1	O60869	EDF1	0.294182	0.999915
40S ribosomal protein S3a	Q6NXR8;A8K4W0;P61247;D6RG13;D6RAT0;B7Z3M5;D6RB09;E9PFI5;H0Y9Y4;H0Y8L7;D6R9B6;D6RAS7	RPS3A	-0.10884	0.999915
Trans-2-enoyl-CoA reductase, mitochondrial	Q9BV79;B4DV18;H3BM30	MECR	0.131008	0.999915
V-type proton ATPase subunit a;V-type proton ATPase 116 kDa subunit a isoform 1	Q53X12;Q93050;Q53ET5;Q5CZH6;B7Z641;B7Z2A9;K7EM24;K7EN36	ATP6V0A1;DKFZp686N0561	-0.213614	0.999915
NA	Q5CZI2	DKFZp686D12108	0.199031	0.999915
Eukaryotic translation initiation factor 5	A0A024R6Q1;P55010;Q6IBU0	EIF5	0.235321	0.999915
Heat shock 70 kDa protein 6;Putative heat shock 70 kDa protein 7	Q53FC7;B2R6X5;P17066;B3KSM6;P48741	HSPA6;HSPA7	0.206528	0.999915
Myosin-11	A0A024QZJ6;A0A024QZJ4;B1PS43;P35749;Q7Z7R0	MYH11	-0.297419	0.999915
S-formylglutathione hydrolase	A0A140VJJ2;P10768;X6RA14;H7BZT7	ESD	0.14981	0.999915
Protein disulfide-isomerase A4	A0A090N8Y2;P13667	ERP70;PDIA4	-0.241437	0.999915
Parathymosin	A0A158RFU3;P20962;O15256;A2VCM6	PTMS	-0.228243	0.999915
Structural maintenance of chromosomes flexible hinge domain-containing protein 1	A6NHR9;J3KTL8	SMCHD1	0.205966	0.999915
39S ribosomal protein L39, mitochondrial	Q9NYK5	MRPL39	-0.138415	0.999915
Protein phosphatase 1A	B5BUD5;B2R8E4;A0A024R6A5;P35813	PPM1A	0.149523	0.999915
Cell division control protein 42 homolog	A0A024RAE4;B4E1U9;P60953;A0A024R9T1;B7ZAY4;B4DMH5;Q5JYX0;Q9UJM1	CDC42;hCG_39634	0.117569	0.999915
Plakophilin-2	Q99959;B8QGS9	PKP2	-0.164197	0.999915
NADH dehydrogenase [ubiquinone] complex I, assembly factor 7	C9J236;C9JS27;B4DXV9;Q7L592;B4DQY3;C9JP36	NDUFAF7	-0.254324	0.999915
Lamina-associated polypeptide 2, isoforms beta/gamma;Thymopoietin;Thymopentin	A0A024RBE7;P42167;G5E972	TMPO	-0.163976	0.999915
ADP-sugar pyrophosphatase	A6NFX8;Q9UKK9;A6NJU6	NUDT5	-0.139041	0.999915
CD59 glycoprotein	E9PNW4;Q6FHM9;E9PR17;P13987	CD59	-0.161863	0.999915
40S ribosomal protein SA	C9J9K3;A0A024R2P0;A0A0C4DG17;P08865;Q96RS2;A0A024R7P5;F8WD59	RPSA;LOC388524	-0.113075	0.999915
SAP domain-containing ribonucleoprotein	P82979;Q567R9;F8VZQ9;H0YHG0;A4D286	SARNP;CIP29;LOC402290	0.225553	0.999915
Histone H1.0;Histone H1.0, N-terminally processed	P07305	H1F0	-0.0932303	0.999915
Plasminogen receptor (KT)	Q9HBL7	PLGRKT	-0.157182	0.999915
Peroxiredoxin-2	V9HW12;P32119;B4DF70;A6NIW5	HEL-S-2a;PRDX2	0.0884915	0.999915
Glutathione S-transferase omega-1	V9HWG9;B2R983;P78417;Q5TA02	HEL-S-21;GSTO1	0.106044	0.999915
Spermine synthase	P52788;H7C2R7;B4DE40	SMS	0.15134	0.999915
Calpain small subunit 1	A0A0C4DGQ5;P04632;K7ELJ7;K7EM73;K7EIV0;A0A075B7C0;U3KQE2;K7EKD8	CAPNS1	0.285211	0.999915
EMILIN-2	Q9BXX0	EMILIN2	0.132978	0.999915
DnaJ homolog subfamily A member 2	A0A024R6S1;O60884	DNAJA2	0.250591	0.999915
39S ribosomal protein L43, mitochondrial	A8K4V4;H0Y6Y8;B1AL05;Q8N983	MRPL43	-0.215196	0.999915
NA	A6N933;A6N931	MYH7	0.324749	0.999915
60S ribosomal protein L26	Q6IBH6;P61254;J3QRI7;J3QQQ9;J3QQV1;J3KTJ8;J3QRC4;A0A024RBF6	RPL26;hCG_26523	-0.107321	0.999915
Splicing factor 3A subunit 3	B3KY12;A8K7V1;A8K566;Q12874;Q53HM6;B4DW90	SF3A3	-0.168187	0.999915
ATPase family AAA domain-containing protein 1	Q8NBU5;B4E2J1	ATAD1	0.197996	0.999915
Protein transport protein Sec61 subunit beta	P60468;Q53FA5	SEC61B	-0.192025	0.999915
Eukaryotic translation initiation factor 5B	A0A087WUT6;O60841;B3KM86;D3DVI5	EIF5B	0.291678	0.999915
ATP synthase subunit alpha;ATP synthase subunit alpha, mitochondrial	V9HW26;P25705	HEL-S-123m;ATP5A1	-0.1009	0.999915
Heterogeneous nuclear ribonucleoprotein R	O43390;Q0VGD6;B4DMB1;B2R7W4;B4DT28	HNRNPR;HNRPR	0.100834	0.999915
NA	B2R642	NA	-0.236651	0.999915
Mitogen-activated protein kinase kinase kinase MLT	D4Q8H0;A8K710;B4DQ47;Q9NYL2	pk;ZAK	-0.249548	0.999915
NA	B4DLN1	NA	0.246786	0.999915
3-hydroxyisobutyrate dehydrogenase;3-hydroxyisobutyrate dehydrogenase, mitochondrial	A0A024RA75;P31937	HIBADH	-0.140273	0.999915
Polyadenylate-binding protein;Polyadenylate-binding protein 4	Q6IQ30;B1ANR0;Q13310;H0Y5F5	PABPC4	-0.171511	0.999915
Ras-related protein R-Ras2	P62070;E9PK85	RRAS2	-0.234661	0.999915
Protein S100;Protein S100-A6	R4GN98;P06703	S100A6	-0.169755	0.999915
Neural cell adhesion molecule 1	A0A087WWD4;P13591;A0A087WX77;A0A087WV75	NCAM1	0.181635	0.999915
Microfibrillar-associated protein 5	B3KW70;F5GYX4;H0YG03;A8K3H0;Q13361;H0YGS3	MFAP5	-0.629839	0.999915
Insulin-like growth factor-binding protein 5	A0A024R433;P24593;C9JXX4	IGFBP5	0.277687	0.999915
ELKS/Rab6-interacting/CAST family member 1	X6RLX0;Q8IUD2;G8JLD3;X6RM00;B4DG07	ERC1	0.147439	0.999915
Transcription activator BRG1	A7E2E1;Q9HBD4;B9EGQ8;A0A0A0MT49;P51532;B4E0F1;B4DSI8;B3KNW7;Q59FZ6	SMARCA4	0.237894	0.999915
Ubiquitin-like modifier-activating enzyme 1	A0A024R1A3;P22314;B4DDE4;B4DL67	UBE1;UBA1	0.26279	0.999915
Destrin	V9HWA6;P60981;F6RFD5;B7Z9M9	HEL32;DSTN	0.137334	0.999915
EH domain-containing protein 3	Q9NZN3	EHD3	0.165317	0.999915
Blood vessel epicardial substance	Q8NE79	BVES	0.248222	0.999915
Tubulin beta-4A chain	P04350;B4DE77;B4DJ43;B4DFH6	TUBB4A	-0.224423	0.999915
Transmembrane protein 109	B2R9T9;Q9BVC6;B4E1S3	TMEM109	-0.151051	0.999915
Clusterin;Clusterin beta chain;Clusterin alpha chain;Clusterin	P10909;H0YLK8;E7ERK6;E7ETB4;H0YC35	CLU	-0.169388	0.999915
Coatomer subunit zeta-1	Q53FU3;A0A024RB72;F8VVA7;P61923;F8VXB1;F8W156;F8W651;F8VYZ4;F8VUC5;F8VXR1	COPZ1	0.230866	0.999915
Enoyl-CoA delta isomerase 1, mitochondrial	P42126;Q96DC0;H3BS70	ECI1;DCI	0.12422	0.999915
Pyridoxal kinase	V9HWC3;O00764;F2Z2Y4	HEL-S-1a;PDXK	0.182532	0.999915
40S ribosomal protein S19	B0ZBD0;Q8WVX7;P39019;A0A075B6E2	RPS19	-0.158184	0.999915
Very-long-chain 3-oxoacyl-CoA reductase	Q53GQ0;B4DWS6;D3DR22;B3KQJ0;A0A1B0GVY6;A0A1B0GV93	HSD17B12	-0.323915	0.999915
Proteasome subunit alpha type-5;Proteasome subunit alpha type	A0A109NGN6;P28066;Q5U0A0	PSMA5	0.0811749	0.999915
Sulfite oxidase, mitochondrial	B2R6Y2;A0A024RB79;P51687;D6QX84	SUOX	-0.262778	0.999915
40S ribosomal protein S20	P60866;E5RJX2;E5RIP1	RPS20	-0.0824147	0.999915
D-beta-hydroxybutyrate dehydrogenase, mitochondrial	Q02338;E9PCG9;C9K0G7	BDH1	-0.173165	0.999915
Vesicle-trafficking protein SEC22b	O75396	SEC22B	0.170813	0.999915
28S ribosomal protein S31, mitochondrial	Q92665	MRPS31	0.133062	0.999915
NA	CON__P02754	NA	0.27039	0.999915
Protein kinase C delta-binding protein	Q969G5;E9PIE3	PRKCDBP	0.159425	0.999915
Multifunctional protein ADE2;Phosphoribosylaminoimidazole-succinocarboxamide synthase;Phosphoribosylaminoimidazole carboxylase	E9PBS1;A0A024RD93;P22234;B4DGX3;D6RF62	PAICS	0.161609	0.999915
Regulator of microtubule dynamics protein 1	Q96DB5;H0YB03;H0YB83;E5RH53	RMDN1	0.209966	0.999915
Nuclear pore complex protein Nup205	Q92621;Q6P486;B4DE72	NUP205	0.182861	0.999915
Dolichyl-diphosphooligosaccharide--protein glycosyltransferase 48 kDa subunit	A0A0C4DGS1;A0A024RAD5;P39656	DDOST	-0.142592	0.999915
Malate dehydrogenase;Malate dehydrogenase, cytoplasmic	V9HWF2;P40925;B9A041;B8ZZ51;C9JF79	HEL-S-32;MDH1	0.0818813	0.999915
Glucose-6-phosphate isomerase	B4DVJ0	NA	0.280332	0.999915
Transmembrane emp24 domain-containing protein 7	A0A0A6YYA0;Q9Y3B3;B4E2C1;Q3B7W7	TMED7-TICAM2;TMED7	0.295318	0.999915
TRIO and F-actin-binding protein	Q9H2D6	TRIOBP	-0.179589	0.999915
Growth factor receptor-bound protein 2	Q6ICN0;B0LPF3;P62993;B3KR50;J3KT38	GRB2	0.0987868	0.999915
Serine/arginine-rich splicing factor 2	J3KP15;Q53FN0;A0A024R8U5;Q01130;J3QL05;B3KUY1;Q8NAK9;B3KX15;Q6NXQ0;Q8N220;B3KVY2;B3KUF7	SRSF2;SFRS2	0.155978	0.999915
60S ribosomal protein L35	P42766;F2Z388;A4D2M5;A0A024R866	RPL35;LOC154880	-0.154217	0.999915
Ribose-phosphate pyrophosphokinase 1	Q53FW2;P60891;B1ALA9;B7ZB02	PRPS1	0.116471	0.999915
DNA topoisomerase 2-beta;DNA topoisomerase 2	Q02880;Q71UH4;B4DKD0;E9PCY5;Q59H80	TOP2B	0.134544	0.999915
Cytochrome c oxidase subunit 5A, mitochondrial	P20674;H3BRM5;H3BV69;H3BNX8	COX5A	-0.161014	0.999915
2-amino-3-ketobutyrate coenzyme A ligase, mitochondrial	O75600;A8K228	GCAT	-0.223025	0.999915
EH domain-containing protein 1	B2R5U3;A0A024R571;Q9H4M9;B4DTR4;B4DMV9;B4DZH9;C9JC03;C9J2Z4;C9JDQ8	EHD1	-0.152231	0.999915
Mitochondrial ribonuclease P protein 1	Q7L0Y3;C9JVB6	TRMT10C	-0.156269	0.999915
AP-2 complex subunit sigma	M0R0N4;M0QYZ2;P53680;M0QZ21;X6R390	AP2S1	0.220194	0.999915
Flotillin-2	A0A024QZ62;Q14254;Q6FG43;E7EMK3;J3QLD9;Q9BTI6;K7EKW9	hCG_1998851;FLOT2	0.0957341	0.999915
Actin, alpha cardiac muscle 1;Actin, aortic smooth muscle;Actin, gamma-enteric smooth muscle	P68032;D2JYH4;A8K3K1;P62736;P63267;B3KW67;Q13707	ACTC1;ACTA2;ACTG2	0.13071	0.999915
SUN domain-containing protein 2	A0A024R1P7;B4E2A6;Q9UH99;B4DIU6;Q6NT72;A8K129	UNC84B;SUN2	0.510867	0.999915
39S ribosomal protein L1, mitochondrial	A0PJ79;Q9BYD6;H0Y8N7	MRPL1	-0.168073	0.999915
Core histone macro-H2A.1;Histone H2A	O75367;B4DJC3;Q59FH0	H2AFY	-0.0898758	0.999915
Adipocyte enhancer-binding protein 1	Q8IUX7;B4DJB3	AEBP1	0.183431	0.999915
Cytochrome b-c1 complex subunit 7	P14927;B7Z2R2;E5RHG9	UQCRB	-0.142267	0.999915
Ribosomal protein S6 kinase alpha-3	B4DKZ2;B4DG22;B7ZB17;P51812	RPS6KA3	-0.195068	0.999915
Ephrin-B3	Q15768	EFNB3	-0.130762	0.999915
Galectin-1	P09382	LGALS1	-0.288314	0.999915
Atypical kinase ADCK3, mitochondrial	A0A024R3S3;Q8NI60;B4DVB7;A1L377;Q5T7A2;B4DED1;B4DN23	CABC1;ADCK3	-0.109278	0.999915
Mitochondrial chaperone BCS1	Q53EX1;A8JZZ8;A0A024R467;Q9Y276;H7C492	BCS1L	0.172196	0.999915
Paxillin	A0A1B0GTU4;F5GZ78;B3KVL0;A0A140VJQ8;A0A1B0GU60;Q59GS5;P49023	PXN	0.136778	0.999915
AP-2 complex subunit alpha-1	O95782	AP2A1	0.203114	0.999915
COP9 signalosome complex subunit 1	Q13098;C9JFE4;B4DND6;A0A096LPJ3;A0A096LP07;A8K070	GPS1	-0.19787	0.999915
Rab GDP dissociation inhibitor alpha	A0A0S2Z3X8;P31150;B4DHX4;B4DH24	GDI1	0.212474	0.999915
Acidic leucine-rich nuclear phosphoprotein 32 family member A	H0YN26;Q6PKH8;Q08AJ6;P39687;Q3KPI8	ANP32A	-0.112407	0.999915
Electron transfer flavoprotein subunit alpha, mitochondrial	A0A0S2Z3L0;P13804;A0A0S2Z3M4;H0YLU7;H0YKF0;H0YL12;H0YK49;H0YNX6	ETFA	-0.110689	0.999915
Small nuclear ribonucleoprotein G;Putative small nuclear ribonucleoprotein G-like protein 15	Q49AN9;F5H013;P62308;A8MWD9	SNRPG;SNRPGP15	-0.1409	0.999915
Chromobox protein homolog 1	J3KS05;Q6IBN6;P83916;B5MD17;K7ELA4	CBX1	-0.165787	0.999915
OCIA domain-containing protein 1	A0A024R9U3;Q9NX40;D6RG39;D6RIT9;D6RDK6;D6RBN5	OCIAD1	0.162664	0.999915
Prolow-density lipoprotein receptor-related protein 1;Low-density lipoprotein receptor-related protein 1 85 kDa subunit;Low-density lipoprotein receptor-related protein 1 515 kDa subunit;Low-density lipoprotein receptor-related protein 1 intracellular domain	Q07954;Q59FG2	LRP1	0.146655	0.999915
FUN14 domain-containing protein 2	Q9BWH2	FUNDC2	-0.15704	0.999915
Alpha-2-macroglobulin	P01023	A2M	-0.246546	0.999915
Mitochondrial pyruvate carrier 2	Q5R3B4;B2R4Q7;A0A024R8Z5;O95563	MPC2;BRP44	-0.13889	0.999915
RNA-binding protein 12	Q69YJ7;Q9NTZ6;B4DRP9;B3KQH4	DKFZp667H197;RBM12	-0.203118	0.999915
Epidermal growth factor receptor substrate 15-like 1	A0A024R7G6;M0R165;A8K5P4;Q9UBC2;A5PKY0;B4DME4;B4DQX5;M0R2S2	EPS15L1	-0.251785	0.999915
Chloride intracellular channel protein;Chloride intracellular channel protein 5	Q53G01;Q9NZA1;B2RAZ0;Q7Z2R8	CLIC5;MST130	-0.218078	0.999915
Serine/arginine-rich splicing factor 4	A0A0D9SEM4;Q53F45;A8K644;Q08170;Q59EF5;B4DEM8	SRSF4;SFRS4	-0.170737	0.999915
Mitochondrial Rho GTPase 1;Mitochondrial Rho GTPase	Q8IXI2;H7BXZ6	RHOT1	-0.219968	0.999915
NA	J3KNF8	CYB5B	0.185545	0.999915
Eukaryotic translation initiation factor 3 subunit I	Q5U0F4;Q53HU7;Q13347	EIF3I	0.314263	0.999915
Stress-70 protein, mitochondrial	B7Z4V2;V9HW84;P38646;Q8N1C8;B7Z4T3;B7Z1V7	HEL-S-124m;HSPA9	-0.102334	0.999915
Annexin;Annexin A5	V9HWE0;P08758;D6RBE9;D6RBL5;E9PHT9	HEL-S-7;ANXA5	-0.123837	0.999915
Very-long-chain enoyl-CoA reductase	Q9NZ01;B3KM97;B3KSQ1	TECR	-0.293167	0.999915
COP9 signalosome complex subunit 7a	Q9UBW8;Q567U8;F5GYF7;F5H248;F5H7C6	COPS7A	-0.188007	0.999915
Myomesin-3	Q5VTT5	MYOM3	-0.330041	0.999915
DNA helicase;DNA replication licensing factor MCM5	Q53FG5;B1AHB0;A8K521;P33992;B1AHB1;B4DQ39;B3KVF0;B4DVK5	MCM5	0.203529	0.999915
Tyrosine-protein phosphatase non-receptor type 11	Q06124	PTPN11	0.10852	0.999915
Glycogen [starch] synthase, muscle	P13807;Q53ER0;A8K6K7;B7Z806;B7Z6I6	GYS1	0.153833	0.999915
B-cell receptor-associated protein 31	Q53HT6;Q53G72;P51572;C9JSP1;C9JQ75;C9J0M4;C9JMD7	BCAP31	0.233399	0.999915
Mitochondrial fission factor	A0A024R491;Q9GZY8	C2orf33;MFF	0.387195	0.999915
Myotrophin	Q69YG1;P58546;C9JL85	DKFZp761E1322;MTPN	0.202509	0.999915
Eukaryotic translation initiation factor 3 subunit H	Q6IB98;Q53HR0;Q53HG0;B3KS98;O15372;Q5BKY2;A0A087WZK9;E5RJT0	EIF3S3;EIF3H	-0.257417	0.999915
Ragulator complex protein LAMTOR2	Q9Y2Q5	LAMTOR2	0.146978	0.999915
26S proteasome non-ATPase regulatory subunit 11	O00231;B4DTS5	PSMD11	0.0741685	0.999915
Histone H2A;Histone H2A type 1-J;Histone H2A type 1-H;Histone H2A.J;Histone H2A type 1-D;Histone H2A type 1	A3KPC7;A0A024RAS2;B2R5B3;A4FTV9;A0A0U1RR32;A0A0U1RRH7;Q99878;Q96KK5;Q9BTM1;P20671;P0C0S8;H0YFX9;B4E0B3	HIST1H2AH;H2AFJ;HIST1H2AK;HIST1H2AJ;HIST1H2AD;HIST1H2AG	-0.123545	0.999915
Chloride intracellular channel protein;Chloride intracellular channel protein 4	Q6FIC5;Q9Y696;B4DWC4;Q9NVF8	CLIC4	-0.15138	0.999915
Copine-1	F2Z2V0;Q99829;A6PVH9;E7ENH5;B0QZ18;Q5JX58;Q5JX59;Q5JX60;Q5JX44;Q5JX55;Q5JX56;Q5JX45;Q59EI4;Q5JX54;Q5JX61;Q5JX52	CPNE1	0.24071	0.999915
Peptidyl-prolyl cis-trans isomerase FKBP10	A0A024R1W3;Q96AY3;B4DJJ5;Q658U4;Q8NAG5;Q6ZME7;H0Y827	FKBP10;DKFZp666D193	0.207206	0.999915
Serine/arginine-rich splicing factor 7	A0A0B4J1Z1;B4DEK2;C9JAB2;Q16629;Q8NB80	SRSF7	-0.181147	0.999915
Nuclear autoantigenic sperm protein	P49321;Q53H03;B4DS57;Q6PJY7	NASP	0.131463	0.999915
Ketimine reductase mu-crystallin	Q14894;I3L325;I3NI53;I3L2W5	CRYM	0.204048	0.999915
[Pyruvate dehydrogenase (acetyl-transferring)] kinase isozyme 1, mitochondrial	Q15118;Q53R49;B7Z7N6;B7Z207;C9IYB4	PDK1	0.149516	0.999915
Heat shock protein 75 kDa, mitochondrial	Q59EK6;Q9BV61;A0A140VJY2;Q12931;Q53G55;Q53FS6;Q8N9Z3;K0A7K7;Q5CAQ4;I3L0K7	TRAP1	-0.137244	0.999915
Vacuolar protein sorting-associated protein 26A	B4DLT1;O75436;S4R3Q6	VPS26A	0.251277	0.999915
SEC23-interacting protein	B4DWG1;B3KM47;Q9Y6Y8;B3KN10	SEC23IP	0.165969	0.999915
Coatomer subunit beta	P35606	COPB2	-0.178216	0.999915
Alpha-actinin-1	A0A024R694;P12814;Q86TX4	ACTN1	0.171693	0.999915
26S protease regulatory subunit 6B	A8K2M0;P43686	PSMC4	0.113647	0.999915
Insulin-like growth factor 2 mRNA-binding protein 1	Q9NZI8;D3DTW3	IGF2BP1	0.115153	0.999915
Cold-inducible RNA-binding protein	D6W5Y5;K7ENX8;K7ELV6;K7EJV5;Q6ZR81;K7ELT6;B4E2A3;K7EJV1;K7EMY9;K7EPM4;Q53XX5;K7ER40;K7EQR7;Q14011	CIRBP	0.165739	0.999915
Protein transport protein Sec31A	A0A024RDD3;D6REX3;O94979;A0A024RDH6;D6RHZ5;H7BXG7	SEC31L1;SEC31A	0.141212	0.999915
Argininosuccinate synthase	Q5T6L4;P00966;A8KAP9;B4E395	ASS;ASS1	0.158683	0.999915
Emerin	P50402;Q5HY57	EMD	0.118611	0.999915
Delta-sarcoglycan	Q92629	SGCD	-0.407931	0.999915
Serine/threonine-protein phosphatase;Serine/threonine-protein phosphatase 6 catalytic subunit;Serine/threonine-protein phosphatase 6 catalytic subunit, N-terminally processed	A0A024R861;O00743	PPP6C	-0.156794	0.999915
NA	Q6P5S8	IGK@	0.284076	0.999915
Acyl-protein thioesterase 1	A0A087X1K9;E5RGR0;Q6IAQ1;B4DJV9;O75608;B4DP64	LYPLA1	0.165435	0.999915
Splicing factor U2AF 35 kDa subunit	P0DN76;B5BU08;Q01081	U2AF1	-0.233757	0.999915
CDK5 regulatory subunit-associated protein 3	Q96JB5;J3QRM1	CDK5RAP3	0.178816	0.999915
Sodium/calcium exchanger 1	P32418;E7EV41	SLC8A1	0.0919255	0.999915
Small ubiquitin-related modifier;Small ubiquitin-related modifier 2	A0A024R8S3;P61956	SUMO2	-0.280925	0.999915
Eukaryotic initiation factor 4A-III;Eukaryotic initiation factor 4A-III, N-terminally processed	A0A024R8W0;P38919	DDX48;EIF4A3	-0.117076	0.999915
Proteasome subunit alpha type;Proteasome subunit alpha type-3	Q6IB71;A0A140VK43;P25788	PSMA3	0.0929734	0.999915
26S proteasome non-ATPase regulatory subunit 7	B2RD27;P51665;B4DXI8;H3BNT7;H3BTM8	PSMD7	0.19814	0.999915
39S ribosomal protein L11, mitochondrial	Q53G19;Q9Y3B7	MRPL11	-0.142604	0.999915
ES1 protein homolog, mitochondrial	A0A140VKB0;A0A0B4J2D5;A0A096LPI6;P30042;A0A096LNH5;A0A0B4J2H4;H7C1F6;H7C2G3	C21orf33	-0.0796906	0.999915
SAFB-like transcription modulator	Q9NWH9;H7BXE3;A0A024R5X3;H0YL55	SLTM	0.150967	0.999915
Lysosomal Pro-X carboxypeptidase	A0A024R5L0;P42785;B7Z7Q6;E9PQB5;E9PL85;E9PQN3;E9PKN6;E9PIG4	PRCP	-0.206916	0.999915
Cytochrome b5	P00167	CYB5A	0.334378	0.999915
Staphylococcal nuclease domain-containing protein 1	A0A140VK49;Q7KZF4;B2R5U1;Q59FF0;B4E299;B3KU67	SND1	-0.0833754	0.999915
60S ribosomal protein L5	B3KTM6;A2RUM7;P46777;Q59GX9	RPL5	0.110855	0.999915
Glutathione synthetase	V9HWJ1;P48637;B7Z1C5;B7Z514	HEL-S-64p;GSS	-0.166391	0.999915
Serine/arginine repetitive matrix protein 2	A0A140VK53;Q9UQ35;O60382	SRRM2;KIAA0324	0.20899	0.999915
Unconventional myosin-Ic	O00159;F5H6E2;B7Z3E5	MYO1C	-0.0833799	0.999915
Creatine kinase M-type;Creatine kinase M-type, N-terminally processed	P06732;B2R892;B4DUP1	CKM	-0.104932	0.999915
Large proline-rich protein BAG6	A0A024RCR6;A0A0G2JK23;P46379;A0A0G2JL47	BAT3;BAG6	0.258719	0.999915
Exocyst complex component 2	B3KPN7;A0A024QZT2;Q96KP1;B4DZI7	EXOC2	0.165342	0.999915
High mobility group protein B2	Q5U071;P26583;D6R9A6	HMGB2	-0.0817615	0.999915
Tubulin-specific chaperone D	J3KR97;Q9BTW9;B4DE53;I6L959	TBCD	0.139899	0.999915
Replication protein A 70 kDa DNA-binding subunit;Replication protein A 70 kDa DNA-binding subunit, N-terminally processed	P27694	RPA1	0.142557	0.999915
Peptidyl-prolyl cis-trans isomerase FKBP1A;Peptidyl-prolyl cis-trans isomerase	P62942;Q5W0X3;A0A087WZM5;Q0VDC6	FKBP1A	0.209391	0.999915
Arginyl-tRNA--protein transferase 1	B4E107;B2R7P0;F5GXE4;B4DR48;B4DK25;H0Y5C2;O95260;Q5SQQ1	ATE1	-0.15378	0.999915
TIP41-like protein	O75663	TIPRL	0.188901	0.999915
Citrate synthase;Citrate synthase, mitochondrial	B4DJV2;A0A024RB75;O75390;B3KTN4;A0A0C4DGI3	CS	-0.108108	0.999915
Myosin-10	P35580	MYH10	-0.075626	0.999915
Eukaryotic translation initiation factor 3 subunit L	B0QY89;Q9Y262;B4DQF6;B3KPB9;B0QY90;B3KNG0	EIF3L	0.141604	0.999915
Syntaxin-7	O15400;B4DH37	STX7	0.182154	0.999915
Obg-like ATPase 1	J3KQ32;Q9NTK5;Q53SQ6	OLA1;PTD004	0.173003	0.999915
26S proteasome non-ATPase regulatory subunit 13	A0A024R201;Q9Y6E3;Q9UNM6;Q53GN6;B2RBM7;A0A087WUL9;B4DJ66;J3KNQ3;E9PL38;H0YD73	PSMD13	0.123747	0.999915
Arginine--tRNA ligase, cytoplasmic	P54136;B4DXW6	RARS	-0.0928171	0.999915
Phosphoribosyl pyrophosphate synthase-associated protein 2	B2R7R5;A0A024QYY3;O60256;I3L0S1;E7EPA1;C9K0K7;C9JJS3	PRPSAP2	0.191613	0.999915
Glutathione S-transferase kappa 1	Q6FII1;Q9Y2Q3;Q2NLC8;E9PFN5;C9JNT3	LOC51064;GSTK1	0.269128	0.999915
Four and a half LIM domains protein 2	Q6I9R8;Q2XQU9;J3KNW4;A0A0A0MSG2;Q14192;Q2TSB7;I0CE67;Q53T40	FHL2;AAG11	0.144324	0.999915
UPF0568 protein C14orf166	Q5RLJ0;Q549M8;Q9Y224;G3V4C6;H0YJB9	C14orf166	0.163173	0.999915
Tubulin-folding cofactor B	K7EK42;Q99426;K7EP07	TBCB	0.190788	0.999915
Dynamin-2	P50570	DNM2	0.193365	0.999915
NA	B4DE59	NA	0.192372	0.999915
40S ribosomal protein S6	Q96DV6;A2A3R6;P62753;A2A3R5	RPS6	0.0773345	0.999915
NA	A8K6Q8;B7Z2I6	NA	0.117532	0.999915
Citrate lyase subunit beta-like protein, mitochondrial	A0A024RE03;Q8N0X4;B4DU60;Q5JVC2	CLYBL	-0.154514	0.999915
U4/U6 small nuclear ribonucleoprotein Prp4	Q6IAP9;Q5T1M7;Q59EL4;O43172;B2R7V4	PRPF4	-0.166642	0.999915
Alpha-1,4 glucan phosphorylase;Glycogen phosphorylase, liver form	B2R825;P06737;E9PK47	PYGL	0.0887123	0.999915
ATP synthase F(0) complex subunit B1, mitochondrial	Q5QNZ2;Q08ET0;A8K4W2;P24539;Q53GB3	ATP5F1;hCG_39985	0.0734925	0.999915
NA	A0A0D9SF30	NCAM1	0.179904	0.999915
Protein S100-A13	Q99584	S100A13	0.179567	0.999915
Small nuclear ribonucleoprotein-associated protein;Small nuclear ribonucleoprotein-associated protein N;Small nuclear ribonucleoprotein-associated proteins B and B	J3QLE5;Q66K91;Q5XPV6;B4DVS0;X5DP00;Q15182;P63162;P14678;Q53HE7;Q9UIS4;J3KRY3;S4R3P3;Q6LBS1	SNRPN;SNRPB	-0.108495	0.999915
BUB3-interacting and GLEBS motif-containing protein ZNF207	X6R4W8;J3QRS9;Q59G94;O43670	ZNF207	0.210696	0.999915
Dermatopontin	Q07507	DPT	0.53746	0.999915
Glutathione S-transferase P	V9HWE9;P09211;A8MX94	HEL-S-22;GSTP1	0.11275	0.999915
DnaJ homolog subfamily A member 1	P31689;B7Z5C0;Q9NXZ8	DNAJA1;HDJ2	0.155729	0.999915
Cytochrome c oxidase subunit NDUFA4	A0A024R9Z0;O00483	NDUFA4	0.09212	0.999915
Histone H2B type 2-E;Histone H2B;Histone H2B type 1-J	Q16778;A0A024RCJ2;P06899	HIST2H2BE;HIST1H2BJ	0.115932	0.999915
Glutathione peroxidase 7	Q96SL4	GPX7	0.156685	0.999915
Keratin, type I cytoskeletal 10	CON__P13645;P13645	KRT10	0.166843	0.999915
Aspartyl/asparaginyl beta-hydroxylase	Q12797	ASPH	-0.210415	0.999915
Glycogen phosphorylase, muscle form;Alpha-1,4 glucan phosphorylase	A0A0M4FEM1;P11217;B4DRW6;B2RB32;B4DRQ4	PYGM	0.0868362	0.999915
Carnitine O-acetyltransferase	P43155	CRAT	-0.110749	0.999915
Aminomethyltransferase;Aminomethyltransferase, mitochondrial	A0A024R2U7;P48728;B3KRJ7;A0A1B0GTM2;A0A1B0GWC4;A0A1B0GVP5;B3KTU4;A0A1B0GTA8;H0Y695;A0A1B0GUU7;B4DGG9;A0A1B0GTV8;A0A1B0GUH1;Q49A62	hCG_2001997;AMT	0.132869	0.999915
Pyruvate dehydrogenase E1 component subunit alpha;Pyruvate dehydrogenase E1 component subunit alpha, somatic form, mitochondrial	A0A024RBX9;P08559;Q53GE3;A5YPB6;A5PHJ9	PDHA1;PDHA1/LOC79064	-0.114317	0.999915
60S ribosomal protein L18	Q0QEW2;H0YHA7;A0A024QZD1;J3QQ67;Q07020;G3V203;F8VUA6;F8VYV2;B4DDY5;A0A075B7A0	RPL18	0.0698268	0.999915
Dolichyl-diphosphooligosaccharide--protein glycosyltransferase subunit DAD1	F5GXX5;P61803;Q53G02;F5H895;A0A0B4J239	DAD1	-0.148262	0.999915
Laminin subunit beta-2	A0A024R319;P55268	LAMB2	0.0954487	0.999915
Alpha-mannosidase;Lysosomal alpha-mannosidase;Lysosomal alpha-mannosidase A peptide;Lysosomal alpha-mannosidase B peptide;Lysosomal alpha-mannosidase C peptide;Lysosomal alpha-mannosidase D peptide;Lysosomal alpha-mannosidase E peptide	B4E0K9;Q59E90;A8K6A7;O00754	MAN2B1	0.154214	0.999915
Acetyl-coenzyme A synthetase;Acetyl-coenzyme A synthetase, cytoplasmic	Q96FY7;Q4G0E8;Q68CU9;H0UIA1;Q6DKJ3;Q9NR19;B3KUV2;Q9H9U4	ACSS2;DKFZp762G026	-0.115713	0.999915
40S ribosomal protein S18	P62269	RPS18	-0.128074	0.999915
Troponin I, slow skeletal muscle	A0A024R959;B3KW26;A0A087WT47;P19237;G3V489;G3V4F8;G3V3L5	TNNI1	-0.181713	0.999915
3-ketoacyl-CoA thiolase, peroxisomal	Q8NCW8;B4DEN6;A0A024R2M6;P09110;H7C131;C9JDE9;A0A140VJX0;H0Y4D4	ACAA1	-0.101623	0.999915
Apolipoprotein E	A0A0S2Z3D5;P02649;J9ZVQ3;H0Y7L5;E9PEV4;E7ERP7	APOE	-0.182489	0.999915
26S protease regulatory subunit 4	Q53XL8;Q53HB3;P62191	PSMC1	0.112957	0.999915
Guanine nucleotide-binding protein G(I)/G(S)/G(T) subunit beta-2	Q6FHM2;P62879;C9JXA5;E7EP32	GNB2	0.165634	0.999915
Vesicle-associated membrane protein-associated protein A	A8KA83;Q9P0L0	VAPA	0.147791	0.999915
TBC1 domain family member 4	A0A024R637;O60343	TBC1D4	0.169837	0.999915
Cellular retinoic acid-binding protein 2	P29373;Q5SYZ4	CRABP2	-0.160971	0.999915
NADH dehydrogenase [ubiquinone] 1 beta subcomplex subunit 9	Q9Y6M9;E9PH64	NDUFB9	0.107196	0.999915
Pre-mRNA 3-end-processing factor FIP1	B4DTW7;Q6UN15	FIP1L1	0.18271	0.999915
60S ribosomal protein L14	P50914	RPL14	-0.178904	0.999915
F-actin-capping protein subunit alpha-1	A0A024R0E5;P52907;A8K0T9	CAPZA1	0.202063	0.999915
Protein phosphatase 1 regulatory subunit;Protein phosphatase 1 regulatory subunit 12A	B2RAH5;O14974;A0A024RBF1;F8VZN8	PPP1R12A	0.129044	0.999915
Cystatin-B	Q76LA1;P04080	CSTB	-0.108085	0.999915
Electron transfer flavoprotein subunit beta	P38117;M0QY67	ETFB	-0.101755	0.999915
Heterogeneous nuclear ribonucleoprotein H2	P55795;B4DFK9;B4DP00	HNRNPH2	-0.112321	0.999915
Suppressor of G2 allele of SKP1 homolog	A8K5T7;Q9Y2Z0;A8K7W3;B4DYC6	SUGT1	0.14955	0.999915
Profilin	D3DNI2;C9J0J7;G5E9Q6;B4DNH1;D3DNI3	PFN2	-0.20671	0.999915
Copine-5	Q9HCH3	CPNE5	-0.197099	0.999915
Proteasome activator complex subunit 1	A0A0K0K1L8;Q06323;Q6FHU3	PSME1	0.117277	0.999915
PI-PLC X domain-containing protein 3	B3KXD1;Q63HM9	PLCXD3	0.153971	0.999915
Tubulin beta chain	Q5JP53;Q5SU16;P07437;B7ZAF0;Q6LC01;B4DY90;Q5ST81;B7ZAK1;Q9BUU9;B4E052;B4DMU8;Q96B85;B4DXZ5;Q1KSF8	TUBB;XTP3TPATP1	0.0784724	0.999915
Cytoplasmic dynein 1 intermediate chain 2	A0A140VKE9;Q13409;B4DPZ3;Q59GU5;E7EQL5;E7EV09	DYNC1I2	-0.188194	0.999915
Melanoma inhibitory activity protein 3	Q5JRA6;A0A0A0MRH6	MIA3	0.127646	0.999915
Mannosyl-oligosaccharide glucosidase	Q13724;C9J8D4	MOGS	0.18821	0.999915
Enolase	B4DUJ6	NA	0.298912	0.999915
Solute carrier family 2, facilitated glucose transporter member 1	B3KVN0;Q0P512;Q59GX2;P11166;B4DKW1;B4DDR6	SLC2A1	0.142462	0.999915
Myosin-6	P13533	MYH6	0.12766	0.999915
Xin actin-binding repeat-containing protein 1	Q702N8	XIRP1	-0.0931425	0.999915
Sarcoplasmic/endoplasmic reticulum calcium ATPase 2	A0A0S2Z3L2;P16615;H7C5W9	ATP2A2	0.0633154	0.999915
Protein-cysteine N-palmitoyltransferase HHAT-like protein	A0A024R2M3;Q9HCP6	GUP1;HHATL	-0.138788	0.999915
Adenosylhomocysteinase	P23526;Q1RMG2	AHCY	0.0724398	0.999915
Transcription intermediary factor 1-beta	B2R8R5;Q13263	TRIM28	-0.116195	0.999915
Ras-related protein Rab-10	P61026;Q53T70	RAB10	0.242793	0.999915
Prostaglandin reductase 1	Q14914;A0A024R172	PTGR1;LTB4DH	0.0953467	0.999915
Striatin	O43815;Q3B874	STRN	0.159648	0.999915
NA	A0A0A6YYJ8;B3KRR1	LUC7L2	0.140286	0.999915
Cathepsin D;Cathepsin D light chain;Cathepsin D heavy chain	A0A1B0GW44;A0A1B0GVD5;A0A1B0GWE8;V9HWI3;P07339;A0A1B0GV23;A0A1B0GVP3;H7C469;H7C1V0	HEL-S-130P;CTSD	-0.121804	0.999915
Caldesmon	Q9NYG1;E9PGZ1;A0A140VKA0;B7Z6G4;E7EX44;Q05682;C9J813;B4DPW5;B4E3I0;Q6PJM5	CALD1	-0.354858	0.999915
Pterin-4-alpha-carbinolamine dehydratase	P61457;Q6FGB3;Q6LEE2	PCBD1;PCBD	-0.213319	0.999915
NA	B4E106	NA	0.209986	0.999915
Platelet glycoprotein 4	E7EU05;D9IX65;D9IX64;D9IX63;B3KUB8;A4D1B1;P16671;E9PLT1;B7Z6C3	CD36	0.523141	0.999915
Histone H1.4	Q4VB24;A3R0T8;P10412;B2R984;A3R0T7	HIST1H1E	0.0795435	0.999915
NA	F8W0P7	ATP5B	0.158882	0.999915
cAMP-dependent protein kinase type II-beta regulatory subunit	Q6DHZ2;A0A024R712;P31323;B3KY43;Q75MP1	PRKAR2B	0.204077	0.999915
Secretory carrier-associated membrane protein 1	O15126;B4E2V7;A0A087WXB0;A8K2G0;A0A087WU14;B4DP10;Q96AZ4	SCAMP1	0.179068	0.999915
NAD kinase 2, mitochondrial	Q4G0N4;A0A0C4DGV3;A0A024R048;B7Z8V7	NADK2;FLJ30596	0.146908	0.999915
NA	D3DTX7	COL1A1	0.12912	0.999915
Heterogeneous nuclear ribonucleoprotein F;Heterogeneous nuclear ribonucleoprotein F, N-terminally processed	A0A024R7T3;P52597;B4DKS8	HNRPF;HNRNPF	-0.089597	0.999915
Spermatogenesis-associated protein 20	A0A0K0K1J9;Q8TB22;A0A0U1RRL8;B3KS41;A8K6Z0;Q9H6R1;B3KWT9	SPATA20	0.158913	0.999915
Biliverdin reductase A	A0A140VJF4;P53004	BLVRA	-0.211751	0.999915
cAMP-dependent protein kinase type I-alpha regulatory subunit;cAMP-dependent protein kinase type I-alpha regulatory subunit, N-terminally processed	Q68DQ4;B2R5T5;P10644;K7EPB2	DKFZp779L0468;PRKAR1A	-0.117625	0.999915
Peroxiredoxin-5, mitochondrial	V9HW35;P30044	HEL-S-55;PRDX5	0.0617679	0.999915
Protein flightless-1 homolog	Q13045;B4DIX0;Q59H95	FLII	0.215701	0.999915
U6 snRNA-associated Sm-like protein LSm6	P62312	LSM6	0.153931	0.999915
Matrin-3	A0A0R4J2E8;A8MXP9;P43243;D6REM6;Q68D11;D6R991	MATR3;DKFZp686K23100	-0.0827038	0.999915
Ubiquilin-2	B4DZF1;Q9UHD9;B4DM19	UBQLN2	-0.204553	0.999915
Muscle-related coiled-coil protein	Q5BKX8	MURC	0.231771	0.999915
Acetyltransferase component of pyruvate dehydrogenase complex;Dihydrolipoyllysine-residue acetyltransferase component of pyruvate dehydrogenase complex, mitochondrial	Q86YI5;A0A024R3D8;P10515;B4DJX1;H0YDD4;E9PEJ4;B4DS43;B4DLQ2	DLAT	-0.0824578	0.999915
High mobility group protein B1	A0A024RDR0;P09429;Q5T7C4;B7Z965;Q59GW1;B3KQ05	HMGB1	0.157102	0.999915
Nucleoporin Nup43	A0PJK4;B3KTT0;Q8NFH3	NUP43	0.16638	0.999915
Transmembrane emp24 domain-containing protein 10	A0A024R6I3;Q53GF9;P49755;B4DZH3	TMED10	0.0833377	0.999915
Alpha-enolase;Enolase	A0A024R4F1;P06733;E2DRY6	ENO1	0.0691238	0.999915
Mitochondrial import inner membrane translocase subunit TIM50	Q0VAB1;A0A024R0M6;Q3ZCQ8;M0R0C3;M0R2F8	TIMM50	0.224199	0.999915
PDZ and LIM domain protein 5	A0A024RDE8;Q96HC4;H0Y8Y3;Q4W5K9	PDLIM5;LIM	-0.119149	0.999915
26S proteasome non-ATPase regulatory subunit 1	B2R6D0;Q99460;A0A087WW66;Q05CW6;Q05BX4	PSMD1	0.0847857	0.999915
Ubiquitin carboxyl-terminal hydrolase;Ubiquitin carboxyl-terminal hydrolase 14	B2RD79;P54578;A6NJA2;D3DUG9;B3KTG4	USP14	0.114473	0.999915
T-complex protein 1 subunit theta	P50990;Q53HU0;Q7Z759	CCT8	0.0683192	0.999915
Coxsackievirus and adenovirus receptor	P78310	CXADR	0.168687	0.999915
Septin-10	E7EW69;A8K7M3;E7EX04;B5ME97;Q9P0V9;B7Z371;Q59H84;Q9H9P7	43353	-0.242704	0.999915
Sushi repeat-containing protein SRPX	P78539;V9HW11	SRPX;HEL-S-83p	0.12863	0.999915
Sorting nexin-12	Q3SYF1;A0A087X0R6;Q9UMY4	SNX12	-0.139278	0.999915
60S ribosomal protein L6	Q8TBK5;Q8N5Z7;A0A024RBK3;Q9HBB3;Q02878;B4DRX3	RPL6	-0.0876344	0.999915
Ribosyldihydronicotinamide dehydrogenase [quinone]	Q5TD07;B3KPX6;A0A024QZT9;P16083;Q5TD05;Q59EN2	NQO2	-0.104247	0.999915
Probable ATP-dependent RNA helicase DDX6	B2R858;P26196	DDX6	0.195433	0.999915
Translocon-associated protein subunit alpha	C9J3L8;C9J5W0;B2R6N9;E9PAL7;C9IZQ1;P43307	SSR1	-0.112723	0.999915
Eukaryotic translation initiation factor 4 gamma 2	D3DQV9;Q59G42;B4DZF2;P78344;H0Y3P2;Q2TU89	EIF4G2;AAG1	-0.157684	0.999915
Transmembrane protein 201	Q5SNT2;H0Y4R5	TMEM201	-0.251251	0.999915
Histidine-rich glycoprotein	B2R8I2;P04196	HRG	-0.276126	0.999915
Transmembrane emp24 domain-containing protein 4	Q7Z7H5	TMED4	0.0861453	0.999915
Eukaryotic translation initiation factor 3 subunit F	B4DMT5;B3KSH1;O00303;B4DEW9	EIF3F	-0.158158	0.999915
Mitochondrial import inner membrane translocase subunit Tim21	A8K1K8;Q9BVV7	C18orf55;TIMM21	0.145005	0.999915
DnaJ homolog subfamily C member 11	Q9NVH1;B4DPK2;B4DGD5	DNAJC11	-0.0895051	0.999915
Prolyl endopeptidase	P48147	PREP	0.11968	0.999915
Ras-related protein Rab-11B;Ras-related protein Rab-11A	Q15907;H3BMH2;H3BSC1;A0A024R5Z8;P62491;B4DMN1	RAB11B;RAB11A	-0.104627	0.999915
Ubiquitin-40S ribosomal protein S27a;Ubiquitin;40S ribosomal protein S27a;Ubiquitin-60S ribosomal protein L40;Ubiquitin;60S ribosomal protein L40;Polyubiquitin-B;Ubiquitin;Polyubiquitin-C;Ubiquitin	Q5RKT7;B2RDW1;P62979;J3QS39;J3QTR3;F5H6Q2;Q3MIH3;F5GYU3;F5H2Z3;F5H265;Q5UGI3;B4DV12;F5H388;F5H747;F5GXK7;J3QKN0;Q5U5U6;Q5PY61;Q9UFQ0;Q96C32;Q96MH4;L8B4I8;L8B196;Q96H31;L8B4R0;A8K674;L8B4Z6;L8B4M0;L8B4J3;Q66K58;Q59EM9;P62987;P0CG47;P0CG48;Q8WYN9;M0R1V7;Q49A90;M0R1M6;M0R2S1	RPS27A;HEL112;UBB;UBC;UBA52;DKFZp434K0435;UbC	-0.0916235	0.999915
Dynein light chain Tctex-type 1	P63172;Q5VTU3	DYNLT1	-0.173781	0.999915
von Willebrand factor A domain-containing protein 8	A3KMH1;B3KT81	VWA8	-0.0945628	0.999915
Four and a half LIM domains protein 1	Q53FI7;B7Z6U8;B7Z5V0;B7Z9A1;B7Z4B7;Q5JXI8;B7Z5T3;Q13642;Q5JXH8;Q5JXH7;Q5JXI3;A0A0D9SFZ9;Q5JXI2;A0A0D9SFI6;A0A0D9SFB0;Q5JXH9;B3KRI9	FHL1	0.137863	0.999915
Translocation protein SEC62	F8WF48;A0JLN5;R9WWI7;Q99442;F8WCJ7;Q3KR08;D3DNQ1	SEC62;TLOC1	0.149541	0.999915
Presequence protease, mitochondrial	B4DH07;Q5JRX3;B4DRW8;A0A0A0MRX9;B3KN37;B3KM51	PITRM1	0.176236	0.999915
Heat shock protein 105 kDa	A0A024RDQ0;A0A024RDS1;Q92598;B4DF68;B4DY72	HSPH1	0.176971	0.999915
COP9 signalosome complex subunit 3	Q9UNS2;H7C3P9;B4DN01	COPS3	-0.185201	0.999915
Exportin-2	P55060;B4DM31;B4DUC5;B4DM67;B4DPS6	CSE1L	-0.141475	0.999915
Ras-related protein Rab-2A	A0A024R7V6;P61019;A0A0A1HAW1;E9PKL7	RAB2;RAB2A	-0.0789579	0.999915
Ragulator complex protein LAMTOR1	F5GX19;F5H3Y3;Q6IAA8;H0YFI1;F5H479	LAMTOR1	0.137259	0.999915
NA	A8K6S3	NA	0.133396	0.999915
MICOS complex subunit MIC10	A0A087WU07;Q5TGZ0;R4GMM1;R4GNA1	MINOS1;MINOS1-NBL1	-0.0915795	0.999915
60S ribosomal protein L34	A0A024RDH8;P49207	RPL34	-0.134543	0.999915
Transmembrane protein 256	K7ENI6;K7ERE1;Q8N2U0	TMEM256	0.0811558	0.999915
Superoxide dismutase;Superoxide dismutase [Mn], mitochondrial	Q7Z7M4;A0A0C4DFU2;P04179;Q7Z7M6;Q4ZJI1;Q7Z7M7;F5H3C5;F5H4R2;A0A0C4DFU1;F5GYZ5;Q7Z7M5;G8JLJ2;A0A0C4DG56	SOD2	-0.114798	0.999915
Fibrinogen gamma chain	C9JC84;P02679;A0A140VJJ6;C9JEU5;D3DP16;Q7Z664	FGG;DKFZp779N0926	-0.398831	0.999915
Platelet-activating factor acetylhydrolase IB subunit alpha	P43034;B4DZN3	PAFAH1B1	0.0919358	0.999915
28 kDa heat- and acid-stable phosphoprotein	Q13442	PDAP1	0.160991	0.999915
Monocarboxylate transporter 4	A0A024R8U1;O15427;Q53G91;J3QQV2;J3QSC3	SLC16A3	-0.15776	0.999915
PC4 and SFRS1-interacting protein	O75475;Q05CM9	PSIP1	0.240437	0.999915
Extended synaptotagmin-2	H7BXI1;A0A087WXU3;A0FGR8	ESYT2	-0.170994	0.999915
NEDD8-conjugating enzyme Ubc12	A0A024R4T4;P61081	UBE2M	-0.183718	0.999915
Glutathione reductase, mitochondrial	V9HW90;P00390	HEL-75;GSR	-0.0919951	0.999915
Dolichyl-diphosphooligosaccharide--protein glycosyltransferase subunit STT3B	Q8TCJ2	STT3B	0.13977	0.999915
NA	A0A024R5W6	TPM1	0.144413	0.999915
Succinyl-CoA:3-ketoacid-coenzyme A transferase;Succinyl-CoA:3-ketoacid coenzyme A transferase 1, mitochondrial	A0A024R040;P55809;Q6IAV5;E9PDW2;B7Z609	OXCT1;OXCT	-0.0834199	0.999915
Myosin-14	Q7Z406	MYH14	-0.130595	0.999915
Ankyrin-2	I6L894;A0A024RDK2;Q01484;A0A024RDI4;B7Z636;E9PHW9;D6RHE1;A0A0U1RQN6;B7Z651	ANK2	-0.117116	0.999915
Protein AMBP;Alpha-1-microglobulin;Inter-alpha-trypsin inhibitor light chain;Trypstatin	B7Z8R6;P02760;S4R3Y4;S4R471	AMBP	-0.37114	0.999915
Tyrosine--tRNA ligase, cytoplasmic;Tyrosine--tRNA ligase, cytoplasmic, N-terminally processed;Tyrosine--tRNA ligase	A0A0S2Z4R1;P54577;A0A0C4DGZ5	YARS	0.0867064	0.999915
Casein kinase I isoform alpha	V9HW00;P48729;Q05DL3;Q6PJ06;B4E1D9;B4DER9;D6REM4;E7ETM0	HEL-S-77p;CSNK1A1	0.0917954	0.999915
Melanoma-associated antigen D2	A0A024R9Y7;Q9UNF1;B4DX55;Q5H909;Q5H907	MAGED2	-0.149884	0.999915
Heat shock protein beta-7	Q9UBY9;D3YTC6;Q68DG0;Q7Z3C1;Q8N241;B3KQL3	HSPB7;DKFZp779D0968;DKFZp686A14192	-0.0945122	0.999915
Bleomycin hydrolase	Q13867;K7ES02;K7ESE8;J3KSD8;B4DXF3	BLMH	0.134025	0.999915
Tropomyosin alpha-1 chain	A0A0S2Z4G6;D9YZV4;P09493;H0YL52	TPM1	0.107944	0.999915
Thioredoxin domain-containing protein 5	A0A024QZV0;Q86UY0;Q6EHZ3;Q658S9;Q8NBS9	hCG_1811539;TXNDC5;STRF8;DKFZp666I134	0.209853	0.999915
Fatty acid-binding protein, epidermal	E7DVW5;Q01469;I6L8B7	FABP5	-0.141342	0.999915
Translocon-associated protein subunit delta	P51571;A6NLM8	SSR4	-0.135475	0.999915
Phosphopantothenate--cysteine ligase	Q9HAB8	PPCS	0.133428	0.999915
ATPase inhibitor, mitochondrial	Q9UII2	ATPIF1	-0.138807	0.999915
NA	CON__P02666	NA	0.630768	0.999915
Succinate dehydrogenase [ubiquinone] cytochrome b small subunit, mitochondrial	Q6UWH2;A0A0S2Z4J3;O14521;H0YD96;H0YD41;G3V173;E9PK73;H3BRW5	UNQ5809;SDHD	0.139173	0.999915
40S ribosomal protein S8	Q5JR94;P62241;Q5JR95;Q9BS10	RPS8	0.0778495	0.999915
Proliferating cell nuclear antigen	Q6FHF5;P12004;Q6FI35	PCNA	0.263884	0.999915
Probable cysteine--tRNA ligase, mitochondrial	Q9HA77	CARS2	-0.122268	0.999915
Isocitrate dehydrogenase [NADP], mitochondrial;Isocitrate dehydrogenase [NADP]	Q53GL5;P48735;Q13584;B4DSZ6	IDH2	-0.0614017	0.999915
14-3-3 protein zeta/delta	D0PNI1;P63104;E7EX29;B0AZS6;B7Z2E6;H0YB80;E7ESK7	YWHAZ	-0.0775523	0.999915
Transforming growth factor-beta-induced protein ig-h3	A0A0S2Z4Q2;Q15582;Q53GU8;A0A0S2Z4K6;H0Y8L3	TGFBI	-0.162766	0.999915
Nebulette	O76041;B0YJ47;Q2TBD1	NEBL	0.0984407	0.999915
Calnexin	P27824	CANX	-0.066155	0.999915
Heme-binding protein 2	Q05DB4;Q9Y5Z4	HEBP2	0.231113	0.999915
Desmoplakin	P15924;Q4LE79	DSP;DSP variant protein	-0.0680188	0.999915
NADH-ubiquinone oxidoreductase 75 kDa subunit, mitochondrial	E5KRK5;P28331;B4DJ81	NDUFS1	-0.0862429	0.999915
Aminoacyl tRNA synthase complex-interacting multifunctional protein 2	B2R7M3;A0A024QZY1;Q13155;A8MU58;F8W950	JTV1;AIMP2	0.124011	0.999915
40S ribosomal protein S14	P62263;H0YB22;E5RH77	RPS14	-0.102915	0.999915
Enoyl-CoA delta isomerase 2, mitochondrial	Q53HG3;Q53GC8;A0A0C4DGA2;A0A024QZU5;O75521;B4DLL3;Q59E94;Q9NYD2;F1LLU7;F8WAW4;C9JB63	ECI2;PECI;HCA64	-0.0939751	0.999915
Ubiquitin carboxyl-terminal hydrolase 47	Q96K76	USP47	-0.183399	0.999915
Cleavage and polyadenylation specificity factor subunit 7	F5H669;B4DGF8;Q8N684;F5H6M0;F5H047	CPSF7	0.130213	0.999915
4-trimethylaminobutyraldehyde dehydrogenase	P49189;B4DE91;B9EKV4;B4DX14;B4DYY1	ALDH9A1	-0.0647804	0.999915
Transmembrane protein 205	K7ELQ9;A0A024R7D3;Q6UW68;K7ER05;K7EJQ9;K7EM09;K7EPR0	TMEM205;UNQ501	-0.139709	0.999915
NA	A6MUU8	MIF	0.286414	0.999915
Plexin-A3	P51805	PLXNA3	-0.198931	0.999915
NADH dehydrogenase [ubiquinone] iron-sulfur protein 7, mitochondrial	F5H5N1;B7Z1U1;A8K0V6;Q8NAS7;Q7LD69;F5GXJ1;O75251;B7Z4P1;Q6ZQU6;A0A087WTI3	NDUFS7	-0.118234	0.999915
Filamin-A-interacting protein 1	A8K2G7;Q7Z7B0;A0A075B6G6	FILIP1	-0.167803	0.999915
Receptor protein-tyrosine kinase;Receptor tyrosine-protein kinase erbB-2	X5DNK3;P04626;B4DTR1;J3QLU9	ERBB2	-0.0827202	0.999915
NEDD8-activating enzyme E1 catalytic subunit	B2RBP3;Q8TBC4;J3JZZ9;F8W8D4;B7Z5F6	UBA3;UBE1C	0.250194	0.999915
Tropomyosin alpha-4 chain	V9HW56;P67936;B4DVY2	HEL-S-108;TPM4	0.226582	0.999915
Versican core protein	A0A024RAQ9;Q59FG9;P13611;E9PF17;A0A024RAP3;A0A024RAL1;D6RGZ6	CSPG2;VCAN	-0.121172	0.999915
Myosin-4	Q9Y623	MYH4	0.192397	0.999915
Tenascin-X	A0A140TA52;A0A140TA41;A0A140TA33;P22105;A0A140T9C0;A0A140T902;A0A140T8Y3;A0A140T8Z8;A0A140T956;A0A087X0I0	TNXB	0.153653	0.999915
Alpha-N-acetylgalactosaminidase	A0A024R1Q5;P17050	NAGA	0.181405	0.999915
40S ribosomal protein S28	B2R4R9;P62857	RPS28	-0.0702067	0.999915
Fumarate hydratase, mitochondrial	A0A0S2Z4C3;P07954	FH	-0.081912	0.999915
Elongation factor 1-gamma	Q53YD7;P26641;B4DUP0	EEF1G	0.098409	0.999915
Myosin light chain 3	A0A024R2Q5;P08590	MYL3	0.114082	0.999915
ATP synthase subunit delta, mitochondrial	P30049	ATP5D	-0.0561027	0.999915
Unconventional myosin-XVIIIb	Q8IUG5;A0A075B6F5;F5GXR6	MYO18B	0.148648	0.999915
28S ribosomal protein S26, mitochondrial	Q9BYN8	MRPS26	0.125795	0.999915
NA	CON__P02663	NA	0.447703	0.999915
26S protease regulatory subunit 10B	V9HW24;A0A087X2I1;P62333	HEL-S-73;PSMC6	-0.0885532	0.999915
CDP-diacylglycerol--inositol 3-phosphatidyltransferase	B3KSW0;Q53HA5;A8K3L7;B3KY94;O14735;H3BUR9	CDIPT	-0.119259	0.999915
LETM1 and EF-hand domain-containing protein 1, mitochondrial	O95202;D3DVQ1	LETM1	0.0936418	0.999915
Dysferlin	O75923	DYSF	-0.0934142	0.999915
Alpha-1-antitrypsin;Short peptide from AAT	E9KL23;P01009	SERPINA1	-0.316626	0.999915
NA	Q8N7A6	NA	0.354469	0.999915
NADH-cytochrome b5 reductase;NADH-cytochrome b5 reductase 3;NADH-cytochrome b5 reductase 3 membrane-bound form;NADH-cytochrome b5 reductase 3 soluble form	A0A024R4X0;P00387;Q6ZVI6	CYB5R3	0.0745434	0.999915
Tumor protein D54	A0A087WYR3;Q68E05;Q6FGS1;O43399;Q53GA0;A0A087WZ51;Q5J908	TPD52L2;DKFZp686A1765	0.0782457	0.999915
Transforming protein RhoA	A0A024R324;P61586;B4DKN9;Q9BVT0	RHOA;ARHA	-0.172967	0.999915
Histone-binding protein RBBP7	Q6FHQ0;Q16576;E9PC52;A8K6A2;Q5JP01	RBBP7	-0.136834	0.999915
Glypican-1;Secreted glypican-1	P35052;H7C410;A0A024R4D5;H7C024;Q59GI7	GPC1	0.086493	0.999915
NA	A0A0U1RQK4	NA	0.111218	0.999915
Vinculin	A0A024QZN4;V9HWK2;P18206;Q5JQ13	VCL;HEL114	0.0659927	0.999915
Phosphatidylinositol-binding clathrin assembly protein	B5BU72;A0A024R5L7;A8K5U9;A0A024R5P1;Q13492;E9PI56;E9PKP6;E9PLJ8	PICALM	-0.211524	0.999915
Bifunctional glutamate/proline--tRNA ligase;Glutamate--tRNA ligase;Proline--tRNA ligase	P07814	EPRS	0.0971938	0.999915
Calpain-2 catalytic subunit	Q59EF6;B2RCM3;P17655;B4E1R7;B4DN77	CAPN2	0.0950081	0.999915
Myosin light chain kinase 3	Q32MK0	MYLK3	0.139095	0.999915
40S ribosomal protein S7	P62081;B5MCP9	RPS7	0.068699	0.999915
ADP-ribosylation factor-like protein 2	Q53YD8;P36404	hCG_23373;ARL2	0.127094	0.999915
39S ribosomal protein L50, mitochondrial	Q8N5N7	MRPL50	-0.169923	0.999915
SH3 domain-binding glutamic acid-rich protein	Q53Y47;P55822;H7C2G0	SH3BGR	0.122111	0.999915
Methylglutaconyl-CoA hydratase, mitochondrial	Q13825	AUH	0.0961544	0.999915
Endoplasmin	Q5CAQ5;V9HWP2;P14625;B4DHT9;B4DU71;Q59FC6	TRA1;HEL-S-125m;HSP90B1	0.0586759	0.999915
Transcription elongation factor B polypeptide 2	Q15370;B8ZZU8;I3L0M9;A0A0B4J296	TCEB2	0.0866978	0.999915
26S proteasome non-ATPase regulatory subunit 4	P55036;A6PVX3	PSMD4	-0.111072	0.999915
Endoplasmic reticulum-Golgi intermediate compartment protein 1	B4E0N6;Q969X5	ERGIC1	-0.176037	0.999915
Peptidyl-prolyl cis-trans isomerase;Peptidyl-prolyl cis-trans isomerase A;Peptidyl-prolyl cis-trans isomerase A, N-terminally processed	V9HWF5;A8K486;P62937;B2RE56;B4DM82;Q71V99;F8WE65;C9J5S7	HEL-S-69p;PPIA	0.0771683	0.999915
Methionine aminopeptidase 1	P53582;Q5CZ91	METAP1;DKFZp781C0419	-0.15004	0.999915
NSFL1 cofactor p47	Q9UNZ2;Q53FE8;Q53FF5;F2Z2K0	NSFL1C	0.063958	0.999915
LEM domain-containing protein 2	A0A024RCZ1;Q8NC56	LEMD2	0.091353	0.999915
40S ribosomal protein S24	E7ETK0;A0A087WUS0;P62847	RPS24	0.0686155	0.999915
Translational activator of cytochrome c oxidase 1	Q9BSH4	TACO1	0.113596	0.999915
Tripeptidyl-peptidase 2	Q5VZU9;P29144;B7Z920	TPP2	0.123759	0.999915
E3 ubiquitin-protein ligase UBR4	Q5T4S7	UBR4	0.12391	0.999915
26S protease regulatory subunit 8	A0A140VJS3;P62195;Q59GS3;J3QSA9;J3QQM1;J3KRP2;J3QLH6	PSMC5	0.0854115	0.999915
Translational activator GCN1	E1NZA1;Q92616;A0A024RBS1	PRIC295;GCN1L1	0.148043	0.999915
Ubiquitin-associated protein 2-like	B4DYY5;F8W726;Q14157;B4DZJ6;Q5VU77	UBAP2L	0.16813	0.999915
Polyadenylate-binding protein 2	Q86U42	PABPN1	0.163868	0.999915
Proteasome subunit alpha type-7;Proteasome subunit alpha type	A0A0K0K1K4;O14818;Q05DH1;H0UI83;H0Y586	PSMA7;hCG_41772	0.0799851	0.999915
Sorting nexin-5	Q9Y5X3;Q5QPE4;Q53FH8;Q6P5V6;Q5QPE5;B7Z476	SNX5	0.247632	0.999915
ADP/ATP translocase 3;ADP/ATP translocase 3, N-terminally processed	Q6I9V5;P12236;Q59EI9	SLC25A6	-0.0717168	0.999915
Asparagine--tRNA ligase, cytoplasmic	O43776;B4DN60	NARS	-0.128078	0.999915
3-ketoacyl-CoA thiolase, mitochondrial	B2RB23;P42765;A0A0B4J2A4;B3KNP8;K7EME0	ACAA2	-0.129139	0.999915
60S ribosomal protein L27	E4W6B6;B2R4D8;A0A024R1V4;P61353;K7ELC7;K7EQQ9	RPL27	-0.088258	0.999915
WD repeat-containing protein 37	Q9Y2I8;C9JGR9;E7EQ49;A0A087WTQ2	WDR37	-0.111253	0.999915
60S ribosomal protein L22	Q7Z4W8;P35268;K7EP65;K7EKS7;K7ELC4;K7EMH1;K7ERI7;K7EJT5	RPL22	0.112678	0.999915
Mitochondrial import receptor subunit TOM40 homolog	A0A024R0P9;O96008;K7EKG4;K7EJ57	TOMM40	-0.106144	0.999915
Protein kinase C and casein kinase substrate in neurons protein 2	Q6FIA3;A0A0U1RR22;Q9UNF0;A0A024R4X1;B0QYG7;B0QYG8	PACSIN2	0.133473	0.999915
TAR DNA-binding protein 43	A0A0A0N0L3;A0A024R4E2;Q13148;A0A087WX29;B1AKP7;G3V162;A0A087X260;A0A087WYY0;K7EJM5;A0A0A0N0N3;A0A0A0N0M3;B4DRW3;A0A087WXQ5;A0A087WV68	TDP43;TARDBP	0.168269	0.999915
Succinate-semialdehyde dehydrogenase, mitochondrial	X5DQN2;X5D299;P51649;C9J8Q5;A8K435	ALDH5A1	-0.127463	0.999915
Alpha-actinin-4	A0A0S2Z3G9;O43707;Q96BG6	ACTN4	-0.137919	0.999915
3-hydroxyacyl-CoA dehydrogenase type-2	A0A0S2Z410;Q99714;Q5H928;A0A0S2Z434	HSD17B10	-0.0762457	0.999915
Serpin B6	A0A024QZX3;P35237;A0A024QZX5;A0A087X1N8;Q8IXH2	SERPINB6	0.0792773	0.999915
NA	B4DSQ5	NA	-0.157784	0.999915
Histidine--tRNA ligase, cytoplasmic	P12081;B4DDD8;B3KWE1;Q52NV4;B4E1C5;E7ETE2;B4DEA2	HARS;HRS	-0.0830994	0.999915
AP-3 complex subunit delta-1	O14617;Q6PK82	AP3D1	0.0630133	0.999915
NA	B7ZA42	NA	0.0587615	0.999915
Microtubule-associated protein RP/EB family member 1	B4DM33;Q15691;A2VCR0	MAPRE1	0.105328	0.999915
Endoplasmic reticulum aminopeptidase 1	A8K6H1;A0A0A7E7X3;A0A0A7E7W9;A0A0A7E7W5;A0A0A7E7T3;A0A0A7E7S5;A0A0A7E6P9;A0A0A7E6P4;A0A0A7E6P0;A0A0A7E6I2;A0A0A7E6D8;A0A0A7E6D4;A0A024RAR8;Q9NZ08;A0A0A7E6K0;A0A0A7E6J5;A0A075BV59;A0A075BSP6;A0A075BTL2	ERAP1;ARTS-1	0.0993127	0.999915
Cytochrome c oxidase assembly factor 3 homolog, mitochondrial	A0A024R1X4;Q9Y2R0;K7EPV0	hCG_16955;COA3	0.115813	0.999915
Ribonuclease inhibitor	A0A140VJT8;P13489;A0A024RC87	RNH1	0.0691246	0.999915
Actin-like protein 6A	Q6FI97;Q53FS0;O96019;H7C5S0	BAF53A;ACTL6A	0.206685	0.999915
60S ribosomal protein L13	Q6NZ55;A8K4C8;P26373;J3QSB4	RPL13	-0.0523178	0.999915
Coatomer subunit gamma-1	Q9Y678;Q8WUI6;B3KW21	COPG1;COPG	0.111572	0.999915
Ubiquitin-like protein ISG15	P05161;A0A096LNZ9;A0A096LPJ4	ISG15	0.114921	0.999915
Protein disulfide-isomerase	A0A024R8S5;P07237;B4DUA5;H7BZ94;B4DLN6;B4DNL5;H0Y3Z3	P4HB	-0.0574352	0.999915
Isobutyryl-CoA dehydrogenase, mitochondrial	Q9UKU7;Q59FC2	ACAD8	-0.0885683	0.999915
Delta(3,5)-Delta(2,4)-dienoyl-CoA isomerase, mitochondrial	Q13011;M0R248	ECH1	-0.0862669	0.999915
Plasminogen activator inhibitor 1 RNA-binding protein	Q8NC51;D3DQ70;Q5VU21;Q63HR1;D3DQ69	SERBP1;DKFZp686P17171	-0.186429	0.999915
40S ribosomal protein S16	P62249;M0R210;M0R3H0;M0R1M5;A0A087WZ27;Q6IPX4	RPS16;ZNF90	0.0632969	0.999915
Phosphoglycolate phosphatase	A6NDG6	PGP	0.0833693	0.999915
Peptidyl-prolyl cis-trans isomerase FKBP9	B3KQQ0;A0A090N8P3;O95302;B7Z230;B7Z1U8	FKBP9	0.103641	0.999915
Peptidyl-prolyl cis-trans isomerase FKBP8	B2R8G6;A0A024R7P2;Q14318;B7Z6M0;U3KQ64;A0A0A0MTJ1	FKBP8	-0.1517	0.999915
Hemoglobin subunit beta;LVV-hemorphin-7;Spinorphin	D9YZU5;P68871;C8C504;Q0Z944;Q9BWV6;Q9GZL9;B3VL86;Q14473;Q8IZI0;Q3LR79;Q4TWB7;A0A1B4WRL5;Q9UK54;B3VL31;Q6V0K9;Q52MT0;E9NGZ5;B3VL05;Q4JLR8;B2M1S6;B5ANL9;F8W6P5;Q3Y9I8;Q4TZM4;B3VL17	HBB	0.142571	0.999915
Collagen alpha-1(XII) chain	D6RGG3;Q99715;A0A087X0A8;B9EJB8	COL12A1	-0.0737868	0.999915
Epimerase family protein SDR39U1	Q9NRG7;G3V4N6;G3V5T1;G3V4Z0;Q86TZ5;F6RWC2	SDR39U1	-0.0893644	0.999915
Ras-related protein Rab-1B	Q9H0U4;Q6FIG4;E9PLD0;Q9H1C9	RAB1B	-0.128315	0.999915
Nucleoprotein TPR	P12270	TPR	-0.116537	0.999915
Sodium/potassium-transporting ATPase subunit beta-1	Q6LEU2;A3KLL5;P05026;A6NGH2	ATP1B1	-0.117332	0.999915
Annexin;Annexin A11	Q5T0G8;P50995;Q6ICS0;Q59EP1;B7Z6L0;B4DPJ2	ANXA11	-0.0920048	0.999915
Protein ERGIC-53	B2R774;A0A024R2A7;P49257;Q53FS4	LMAN1	0.139929	0.999915
60S ribosomal protein L36a-like	B2R4V2;Q969Q0	RPL36AL	-0.141395	0.999915
Septin-6	Q541S4;Q548C9;B1AMS2;Q6B514;B4DZW0;Q8NFH9;Q14141;Q6NT82;B4E049;B4DPT4;Q8NFI2;Q8NFI0	43349	0.246766	0.999915
39S ribosomal protein L41, mitochondrial	Q8IXM3	MRPL41	0.0925221	0.999915
5(3)-deoxyribonucleotidase, cytosolic type	V9HWF3;Q8TCD5;J3KRC4;J3KSY6	HEL74;NT5C	0.164667	0.999915
39S ribosomal protein L46, mitochondrial	Q9H2W6	MRPL46	0.170215	0.999915
Nephronectin	D6RH31;Q6UXI9;H0YAK9	NPNT	0.133023	0.999915
Leiomodin-1	B3KX20;B4E3F8;B4E3S9;B4DIX9;P29536	LMOD1	0.0903554	0.999915
Succinyl-CoA ligase [ADP/GDP-forming] subunit alpha, mitochondrial	Q6IAL5;A8K4W7;P53597;B2R8A1;B7Z438	SUCLG1	0.0763583	0.999915
60S ribosomal protein L24	C9JXB8;C9JNW5;V9HW01;P83731	RPL24;HEL-S-310	-0.0527902	0.999915
ATP-binding cassette sub-family B member 7, mitochondrial	A0A0S2Z2Z3;O75027;A0A087WW65;B4DGL8;B3KM98	ABCB7	0.196653	0.999915
Collagen alpha-1(XV) chain;Restin;Restin-2;Restin-3;Restin-4	A0A087X0K0;P39059;B3KTP7	COL15A1	-0.310735	0.999915
Importin-9	Q96P70	IPO9	-0.146303	0.999915
Cold shock domain-containing protein E1	Q9GZV0;A0A024R0K2;A0A024R0E2;O75534;Q96L66;E9PLT0	CSDE1;UNR	-0.117453	0.999915
Iron-sulfur protein NUBPL	X5D2R5;Q8TB37;X5D995;X5DR74;F8W061;B4DWB0;H0YHR7	NUBPL	-0.108943	0.999915
Mitochondrial-processing peptidase subunit alpha	Q10713	PMPCA	-0.079672	0.999915
Peptidyl-prolyl cis-trans isomerase;Peptidyl-prolyl cis-trans isomerase-like 3	A0A024R3V4;Q9H2H8;B8ZZ77;A0A0S2Z5A8;H7BZ14;B4DN80;C9K058	PPIL3	-0.154523	0.999915
N(G),N(G)-dimethylarginine dimethylaminohydrolase 1	B1AKK2;O94760;B4E3V1;B4DYP1;B4DGT0	DDAH1	0.113195	0.999915
2-oxoglutarate dehydrogenase, mitochondrial	Q02218;A0A0D9SFS3	OGDH	-0.0879986	0.999915
Protein transport protein Sec61 subunit alpha isoform 1	B3KNF6;B4DR61;P61619;H7C1Q9;C9JXC6;H7C069;A6NK38;F2Z2C7;A6NIF9;C9JJV4	SEC61A1;SEC61A2	0.115248	0.999915
Protein transport protein Sec61 subunit alpha isoform 2	F8W776;Q9H9S3;B3KQ68;Q8TC24	SEC61A2	-0.131218	0.999915
Diablo homolog, mitochondrial	Q502X2;A0A0S2Z5U7;Q9NR28;A0A024RBT2;A0A0S2Z5P6;Q53HB7;K7X1S0;F5H796;F5GXT8	DIABLO	-0.0800246	0.999915
Importin subunit alpha;Importin subunit alpha-7	B4DII5;B4DWX3;O60684;Q5TFJ7	KPNA6	0.116428	0.999915
Serpin H1	A0A024R5K8;P50454;B4DN87;A8K259;E9PR70;E9PK86;E9PMI5	SERPINH1	0.0936456	0.999915
Poly(rC)-binding protein 2	H3BRU6;F8VZX2;Q15366;B4DRD7	PCBP2	0.0919596	0.999915
Collagen alpha-1(III) chain	P02461	COL3A1	0.110407	0.999915
Glutamate dehydrogenase;Glutamate dehydrogenase 1, mitochondrial;Glutamate dehydrogenase 2, mitochondrial	B4DMF5;E9KL48;P00367;B4E0N9;Q53GW3;B4DMG8;B3KT18;A0A140VK14;P49448	GLUD1;GLUD2	-0.0478872	0.999915
Mitochondrial import inner membrane translocase subunit Tim10	P62072	TIMM10	-0.182697	0.999915
PRA1 family protein 3	B4DZZ0;B3KQB4;A0A024R371;O75915	ARL6IP5	0.0856992	0.999915
26S proteasome non-ATPase regulatory subunit 6	Q15008;B3KT66;C9J0E9	PSMD6	-0.0772749	0.999915
Ras-related protein Rab-5B	A0A024RB09;P61020;Q6FI54	RAB5B	0.0812349	0.999915
Kinesin-like protein;Kinesin-1 heavy chain	V9HW29;P33176;D3DRX6	HEL-S-61;KIF5B	-0.0807657	0.999915
NA	H0Y2W2	ATAD3A	-0.0884635	0.999915
14-3-3 protein theta	P27348;B4DMT8;Q53S41;B4DY04;E9PG15	YWHAQ	-0.101506	0.999915
Metaxin-2	B7Z9F3;O75431;C9JNK6;B3KM74;C9JAZ1	MTX2	-0.118051	0.999915
Pyruvate kinase;Pyruvate kinase PKM	V9HWB8;P14618;B4DNK4;Q8WUW7	HEL-S-30;PKM;PKM2	-0.063587	0.999915
Bcl-2-like protein 13	Q9BXK5;A0A087WX97;A0A087WTL4;E9PDD6;B2RB43	BCL2L13	0.126577	0.999915
Aspartate aminotransferase;Aspartate aminotransferase, mitochondrial	A0A024R6W0;P00505;B3KUZ8;A8K482	GOT2	-0.0846236	0.999915
40S ribosomal protein S26;Putative 40S ribosomal protein S26-like 1	A0A024RB14;P62854;Q75MH1;Q5JNZ5	RPS26;RPS26P11	-0.102971	0.999915
Protein PBDC1	Q9BVG4;Q9P0N4;A6NDF3	PBDC1	0.0820273	0.999915
Kinase D-interacting substrate of 220 kDa	Q9ULH0;E9PH70;H0Y8E4;B4DGY1;B4DK94;Q7Z322	KIDINS220;DKFZp686H14204	-0.125659	0.999915
60S ribosomal protein L29	A0A024R326;Q6IPI1;P47914	RPL29	-0.147653	0.999915
Flavin reductase (NADPH)	V9HWI1;P30043;M0R192;M0QZL1	HEL-S-10;BLVRB	0.0641203	0.999915
Peroxidasin homolog	Q92626;H7C1W1	PXDN	0.114296	0.999915
Fibrillin-2	P35556;A0A087WYV8;D6RJI3	FBN2	0.097903	0.999915
Nucleoporin p54	Q53FD7;Q53H29;Q7Z3B4;B4DRV5	NUP54	-0.0976309	0.999915
Thioredoxin domain-containing protein 17	A0A140VJY7;Q9BRA2;I3L0K2;I3L3M7;I3L2R6	TXNDC17	-0.0665639	0.999915
Sorting and assembly machinery component 50 homolog	Q9Y512	SAMM50	0.0593199	0.999915
Clathrin heavy chain;Clathrin heavy chain 1	A0A087WVQ6;Q00610	CLTC	-0.0522331	0.999915
Ras-related protein Rap-1A	A8KAH9;P62834;Q5U0C3;A0A075B6Q0	RAP1A	0.0626933	0.999915
SNW domain-containing protein 1	Q13573;Q6I9S2;B7Z9X2;B4DY36;A0A024R6E3;G3V3A4;B4DEG7;G3V4X8;Q9ULA6;Q6P151	SNW1	-0.15209	0.999915
Vacuolar protein sorting-associated protein 29	Q5JPE4;F8VXU5;Q9UBQ0	DKFZp667O202;VPS29	0.225748	0.999915
Uveal autoantigen with coiled-coil domains and ankyrin repeats	H0YNH8;B7ZKM6;Q9BZF9;F5H2B9;B7ZKM7	UACA	-0.101638	0.999915
Zinc finger protein 512	G3XAG1;Q96ME7;B4DES6;B7Z9P6;Q658M0;B4E0X7	ZNF512;DKFZp666L156	0.0969048	0.999915
CD166 antigen	Q13740;F5GXJ9;B3KNN9;B4DX43	ALCAM	0.0859881	0.999915
ATPase ASNA1	A0A087WXS7;O43681;B4DEE5;K7ERW9	ASNA1	-0.0663078	0.999915
N-acetylglucosamine-6-sulfatase	B4DTT0;Q7Z3X3;H7C3P4;A8K6V6;A0A024RBC5;F6S8M0;B4E284;P15586;H0YFA9;F5H4C6	DKFZp686E12166;GNS	0.11342	0.999915
TSC22 domain family protein 2	O75157	TSC22D2	-0.184972	0.999915
Triosephosphate isomerase	V9HWK1;P60174;Q53HE2;B4DUI5;U3KPZ0	HEL-S-49;TPI1	0.0495119	0.999915
28S ribosomal protein S6, mitochondrial	P82932	MRPS6	0.107198	0.999915
Matrix-remodeling-associated protein 7	P84157	MXRA7	0.118689	0.999915
Fragile X mental retardation protein 1	R9WQY1;A8MQB8;G3V0J0;X5D907;R9WPL0;A0A087WXI3;X5DQX7;Q06787;R9WNI0;W5ZQ92;Q59GC1;A0A0K0MJ24;Q8IXW7	FMR1	-0.185602	0.999915
Septin-2	Q15019;C9J938;C9JB25	43345	-0.0735689	0.999915
Protein LYRIC	A0A024R9D2;Q86UE4;E5RJU9	MTDH	-0.13265	0.999915
GTP-binding nuclear protein Ran	B5MDF5;P62826;J3KQE5;F5H018;H0YFC6	RAN	0.0618267	0.999915
Proteasome-associated protein ECM29 homolog	Q5VYK3;J3KN16;B3KXF2	ECM29;KIAA0368	-0.166767	0.999915
Ribosomal protein L15;60S ribosomal protein L15	A0A024R2Q4;P61313;B4DLP4;E7EQV9;E7ENU7;B4DEN1	RPL15	0.0811293	0.999915
CLIP-associating protein 1	F8WA11;Q7Z460;B7Z5R7;B7Z4E5;B7Z7Q8;H0Y5T1;Q68D09;B7Z2P0	CLASP1;DKFZp686D1968	-0.276605	0.999915
Rab3 GTPase-activating protein non-catalytic subunit	Q9H2M9	RAB3GAP2	-0.135598	0.999915
Isoleucine--tRNA ligase, mitochondrial	Q9NSE4;A8K5W7	IARS2	-0.0526862	0.999915
Sorbin and SH3 domain-containing protein 1	Q9BX66;B4DTX5;B4E264;A0A0U1RQI5	SORBS1	-0.0725765	0.999915
AP-2 complex subunit alpha-2	B7Z5S9;O94973;A0A0G2JS82;A0A0G2JQM1;B7Z1Q4	AP2A2	0.0934546	0.999915
Eukaryotic translation initiation factor 3 subunit B	B4DV79;A4D210;A0A024R821;P55884;B4DXN6;Q96G38;Q86UM1	EIF3B;EIF3S9	-0.100282	0.999915
Dual specificity mitogen-activated protein kinase kinase 2	P36507;B3KS97;Q7Z370;G5E9C7	MAP2K2;DKFZp686L02273	-0.114905	0.999915
Collagen alpha-2(I) chain	A0A087WTA8;A0A0S2Z3H5;P08123	COL1A2	0.133799	0.999915
Dihydrolipoyllysine-residue succinyltransferase component of 2-oxoglutarate dehydrogenase complex, mitochondrial	A0A024R6C9;P36957;Q6IBS5;Q86TQ8;Q86TW7	DLST	-0.0879096	0.999915
Non-specific serine/threonine protein kinase;Serine/threonine-protein kinase MRCK beta	A0A024R6N2;Q9Y5S2	CDC42BPB	-0.143216	0.999915
Leucine-rich PPR motif-containing protein, mitochondrial	E5KNY5;P42704;B4DSR0	LRPPRC	0.0592126	0.999915
Carbonyl reductase family member 4	Q8N4T8;H0Y962	CBR4	0.122186	0.999915
Solute carrier family 2, facilitated glucose transporter member 3	B7Z966;P11169;Q59F54;B7Z5A7	SLC2A3	0.084248	0.999915
High mobility group protein HMG-I/HMG-Y	B4DWA0;A0A024RCT9;P17096	HMGA1	0.0573337	0.999915
Nuclear transport factor 2	A0A024R6Y2;P61970;H3BRV9	NUTF2	-0.112967	0.999915
Calcium-binding mitochondrial carrier protein SCaMC-1	Q6NUK1;B7ZB41;B4E290	SLC25A24	0.0693958	0.999915
Prostaglandin F2 receptor negative regulator	Q9P2B2	PTGFRN	-0.0860175	0.999915
D-3-phosphoglycerate dehydrogenase	O43175;V9HW79;Q5SZU1;B3KSC3;Q9UMY2	PHGDH;HEL-S-113;PGDH3	-0.0899703	0.999915
Paraspeckle component 1	A0A024RDP4;B4DWI8;Q8WXF1;X6RDA4	PSPC1	-0.0839972	0.999915
Proteasome subunit alpha type-4;Proteasome subunit alpha type;Proteasome subunit beta type	P25789;H0YN18;B2RDG0;H0YMZ1;H0YL69;H0YMA1;H0YKT8	PSMA4	0.0583592	0.999915
Fibrillin-1	P35555;Q75N88	FBN1	0.1241	0.999915
Anoctamin-6;Anoctamin	Q4KMQ2;B4DZA5;B4E1V1;B3KX12	ANO6	0.0967969	0.999915
Guanine nucleotide-binding protein subunit beta-2-like 1;Guanine nucleotide-binding protein subunit beta-2-like 1, N-terminally processed	E9KL35;P63244;J3KPE3;D6RAC2;D6REE5;H0YAF8;H0Y8W2;D6RHH4;H0YAM7;D6R9Z1;D6R9L0	GNB2L1	-0.119745	0.999915
Collagen alpha-1(I) chain	P02452;Q6LAN8;H9C5C5	COL1A1	0.155537	0.999915
Nuclear mitotic apparatus protein 1	A0A024R5M9;Q4LE64;Q14980;A0A087WY61;A0A024R5G4;Q59HB8;Q7Z757	NUMA1;NUMA1 variant protein	-0.0852472	0.999915
Replication protein A 14 kDa subunit	B5MC59;A4D105;P35244	RPA3	-0.0972403	0.999915
Ataxin-10	Q9UBB4;Q7Z524	ATXN10	0.0957572	0.999915
Protein CutA	O60888;C9IZG4	CUTA	-0.0961837	0.999915
DNA mismatch repair protein Msh6	P52701;A0A087WWJ1;Q1L838	MSH6;GTBP	0.154556	0.999915
Hexokinase;Hexokinase-2	E9PB90;P52789;Q68E10;A8K2U2;Q53QX9	HK2;DKFZp686M1669	0.102295	0.999915
Laminin subunit beta-1	G3XAI2;P07942;Q8TAS6	LAMB1	-0.0664003	0.999915
Lactadherin;Lactadherin short form;Medin	B3KTQ2;A0A024RC55;Q08431;A0A024RC59;F5GZN3;B4E396	MFGE8	-0.0857603	0.999915
Probable C->U-editing enzyme APOBEC-2	Q9Y235;B4DUL0	APOBEC2	-0.0758983	0.999915
Guanidinoacetate N-methyltransferase	V9HWB2;Q14353;B4DMJ3	HEL-S-20;GAMT	-0.0781804	0.999915
Trifunctional enzyme subunit alpha, mitochondrial;Long-chain enoyl-CoA hydratase;Long chain 3-hydroxyacyl-CoA dehydrogenase	E9KL44;P40939;B4DRH6;B4DDZ5	HADHA	-0.0392091	0.999915
Isocitrate dehydrogenase [NAD] subunit, mitochondrial;Isocitrate dehydrogenase [NAD] subunit alpha, mitochondrial	B4DJB4;P50213;H0YL72;B4DSY4;B7Z9J8;H0YMU3	IDH3A	-0.0440823	0.999915
Nucleolysin TIAR	O15187;Q2TSD2;A8K5C4;Q01085;A6NKZ9;E7ETJ9;E7ETC0;Q59G49;Q49AS9	TIAL1	-0.14262	0.999915
60S ribosomal protein L11	Q5VVD0;P62913;Q08ES8;Q5VVC8;Q5VVC9	RPL11	0.103963	0.999915
GTP-binding protein SAR1a	Q5SQT9;Q9NR31;Q8NG23;B2R679;Q6FID4;Q5SQT8	SAR1A;SARA1	-0.104727	0.999915
T-complex protein 1 subunit eta	Q53HV2;Q99832;Q6IBT3;B7Z7I4;B7Z1C9	CCT7	-0.049863	0.999915
Cytoplasmic dynein 1 light intermediate chain 1	Q9Y6G9;B3KM42;E9PHI6;B4DDM4;Q6MZE7	DYNC1LI1;DKFZp686A1525	0.0803053	0.999915
Protein canopy homolog 2	F8W031;F8VXJ7;Q9Y2B0;F8W1K5	CNPY2	-0.149667	0.999915
L-xylulose reductase	J3KS22;Q7Z4W1;J3QS36;J3KRZ4;J3QS45;J3KSZ5	DCXR	-0.0653936	0.999915
Spectrin beta chain, non-erythrocytic 1	B2ZZ89;Q01082;A0A087WUZ3;D6W5C0;K9MS24	SPTBN1	-0.0490104	0.999915
Sphingosine-1-phosphate lyase 1	O95470	SGPL1	0.0838282	0.999915
Cation-independent mannose-6-phosphate receptor	P11717;Q59EZ3	IGF2R	0.154552	0.999915
Cytosol aminopeptidase	V9HW38;P28838;B4DQG5;H0Y9Q1	HEL-S-106;LAP3	-0.0727588	0.999915
A-kinase anchor protein 12	Q02952	AKAP12	-0.139437	0.999915
Septin-9	A0A0S2Z5A5;A0A024R8V0;Q9UHD8;A0A024R8Q0;A0A0S2Z5W9	43352	0.101341	0.999915
Drebrin	Q16643;D6R9W4;B3KSQ7	DBN1	-0.112888	0.999915
Rho-associated protein kinase;Rho-associated protein kinase 1	D9ZGF8;Q13464;A0A0U1RQV4	ROCK1	0.124711	0.999915
Beta-actin-like protein 2	Q562R1	ACTBL2	-0.135097	0.999915
Growth hormone-inducible transmembrane protein	B4DSV8;B4DPG9;Q9H3K2;Q6FIA7;B4DNL0;Q9Y6G2	GHITM	0.0649893	0.999915
Acyl-protein thioesterase 2	A0A140VJC9;O95372;Q5QPQ1;Q5QPQ0;Q5QPQ3;Q5QPQ2	LYPLA2	-0.147099	0.999915
Protein NDRG2	Q9UN36;G3V5H8;G3V4S9;Q8TDR6;A0A0A0MS87;G3V578;H0YJT9;G3V5L7;G3V2I9	NDRG2	0.114511	0.999915
NA	A1L0S7;B7Z6H8	TNS1	-0.0789371	0.999915
cAMP-dependent protein kinase catalytic subunit alpha	A0A024R7J0;P17612;A8K8B9;Q15136;K7ERP6	PRKACA;KIN27	0.0607468	0.999915
Sorcin	C9J0K6;P30626;B4DHQ6	SRI	0.0602849	0.999915
Vacuolar protein sorting-associated protein 28 homolog	Q548N1;Q9UK41;A0A0S2Z5H5;E9PQR7;E9PM90	VPS28	0.0866578	0.999915
COP9 signalosome complex subunit 2	Q53HJ0;Q59EL2;P61201;B2R6N0;B4DIH5;H0YKU5	COPS2	0.13345	0.999915
SWI/SNF complex subunit SMARCC2	Q59G16;F8VXC8;A0A024RB22;Q8TAQ2;B4DF22	SMARCC2	0.0795461	0.999915
Calcium/calmodulin-dependent protein kinase type II subunit delta	D6R938;A0A024RDK3;Q13557;E9PBG7;E9PF82;B7Z2B0;Q4G1A8	CAMK2D	0.0537527	0.999915
Acyl-coenzyme A thioesterase 1	E9KL42;Q86TX2;B4DV16;A1L172;G3V4F2;B7ZMC1	ACOT1	-0.065993	0.999915
Cyclin-dependent kinase 9	B5BU53;B2R9L6;A0A024R880;P50750	CDK9	-0.0963374	0.999915
Vesicular integral-membrane protein VIP36	B4DWN1;A8K7T4;Q12907;D6RBV2;D6RIU4;D6RDX1	LMAN2	0.10225	0.999915
NA	B7Z4U9;Q59HE3;B2RCJ7;B7Z5T6;A8K8C4;Q15786	NA	0.0522709	0.999915
Glutamine--tRNA ligase	Q53HS0;P47897;A8K3A8;B4DNN3	QARS	0.0840442	0.999915
Sodium/potassium-transporting ATPase subunit alpha-2	B3KRI1;B1AKY9;B2RAQ4;A0A0S2Z3W6;P50993;B3KX35;H0Y7C1;B4DIQ8	ATP1A2	0.0607826	0.999915
Rho-related GTP-binding protein RhoC	Q5JR08;A0A024R0I3;P08134;E9PQH6;Q5JR07;C9JNR4;C9JX21;Q5JR05	RHOC;hCG_2043376;RHOA	0.115875	0.999915
Carnitine O-palmitoyltransferase 2, mitochondrial	A0A140VK13;A0A1B0GVF3;P23786;A0A1B0GTB8;A0A1B0GWC0;A0A1B0GV75	CPT2	0.0596676	0.999915
Cytochrome b-c1 complex subunit 1, mitochondrial	P31930	UQCRC1	0.0645433	0.999915
Mitochondrial import inner membrane translocase subunit TIM44	Q53G69;O43615;Q9UPE4;M0QXU7	TIMM44;hTIM44	0.102865	0.999915
Tyrosine-protein kinase receptor;Protein TFG	Q05BK6;Q7Z426;Q8TDJ5;Q92734;C9JJP5;C9JUE0;C9JTY3;Q7Z427	TFG;TFG/ALK fusion	-0.100796	0.999915
Laminin subunit alpha-2	P24043;A0A087WX80;A0A087WYF1;Q59H37	LAMA2	-0.0582649	0.999915
Methylosome protein 50	A0A024R0H7;Q9BQA1;H0Y711	WDR77	0.0714003	0.999915
GTP:AMP phosphotransferase AK3, mitochondrial	Q7Z4Y4;Q9UIJ7;Q7Z531	AK3	-0.0649162	0.999915
Protein AHNAK2	Q8IVF2	AHNAK2	0.133237	0.999915
Tubulin alpha-8 chain	C9J2C0;Q9NY65;Q7Z3M3	TUBA8;DKFZp686L04275	-0.324392	0.999915
Estradiol 17-beta-dehydrogenase 8	Q92506	HSD17B8	-0.062259	0.999915
Gamma-glutamylcyclotransferase	A0A090N7V5;O75223;M0QZK8;B8ZZK2;B3KMN7	C7orf24;GGCT	0.111045	0.999915
T-complex protein 1 subunit gamma	B3KX11;P49368;Q59H77;Q2TU64;B4DUR8	CCT3	-0.0415293	0.999915
NA	Q6ZN40	TPM1	0.0988466	0.999915
N-acetylserotonin O-methyltransferase-like protein	O95671;B4DRF1;B3KM43;B4DN81	ASMTL	-0.080885	0.999915
Probable 2-oxoglutarate dehydrogenase E1 component DHKTD1, mitochondrial	Q96HY7	DHTKD1	0.110375	0.999915
NADH dehydrogenase [ubiquinone] 1 beta subcomplex subunit 4	O95168;C9JXQ9;F2Z3P9	NDUFB4	-0.0944147	0.999915
E3 ubiquitin-protein ligase MARCH5	Q9NX47	43164	-0.102077	0.999915
Phenylalanine--tRNA ligase beta subunit	Q9BR63;Q9NSD9;A8K666;B7ZB32	FARSB	-0.0757223	0.999915
Proliferation-associated protein 2G4	A8K6Y1;Q6PIN5;A0A024RB85;Q9UQ80;Q05D08;F8VR77	PA2G4	0.0622565	0.999915
Cleavage and polyadenylation specificity factor subunit 5	B2R6U8;A0A024R6W2;O43809;H3BND3	NUDT21	0.154963	0.999915
Lumican	P51884;Q53FV4	LUM	0.218745	0.999915
Cytochrome b-c1 complex subunit 8	O14949;B7Z4A1	UQCRQ	0.0875018	0.999915
Dolichyl-diphosphooligosaccharide--protein glycosyltransferase subunit STT3A	A0A024R3J7;P46977	hCG_2032701;STT3A	-0.158733	0.999915
DNA fragmentation factor subunit alpha	Q53HN4;O00273;A0A024R4H5	DFFA	0.111904	0.999915
Tumor suppressor p53-binding protein 1	A6NNK5;Q12888;B7Z3E7;A8KA50	TP53BP1	0.0913103	0.999915
ADP/ATP translocase 2;ADP/ATP translocase 2, N-terminally processed	P05141;Q6NVC0	SLC25A5	0.0469824	0.999915
Amino acid transporter;Neutral amino acid transporter A	Q9P2X2;Q53F03;B2R7N6;P43007;B7Z9M1;B7Z561	SLC1A4	0.131861	0.999915
RNA-binding protein 25	P49756	RBM25	0.0619867	0.999915
Tetraspanin;CD151 antigen	E9PMR4;A0A024RCB3;P48509;E9PRJ3;Q53FU5	CD151	0.0969802	0.999915
Laminin subunit gamma-1	A0A024R972;P11047	LAMC1	-0.0637221	0.999915
Translationally-controlled tumor protein	A0A0P1J1R0;Q5W0H4;A0A0B4J2C3;P13693;J3KPG2;E9PJF7;Q9UP43;B4DKJ4;B4DLD6	TPT1	0.219774	0.999915
Pleckstrin homology domain-containing family A member 7	E9PKC0;Q6IQ23;H0YDE2;A0A1B0GUN0	PLEKHA7	-0.104761	0.999915
Elongation factor 1-delta	E9PK01;P29692;A0A087X1X7;Q71RH4;Q9H7G6;D3DWK1;B2RAR6;E9PRY8;E9PPR1;E9PL12;E9PQ49;E9PI39;E9PMW7;E9PIZ1;H0YCK7;E9PQZ1	EEF1D	-0.0652592	0.999915
Superkiller viralicidic activity 2-like 2	P42285;B4E3M6;A8K6I4	SKIV2L2	0.0950974	0.999915
Inositol monophosphatase 1	A0A024R830;A0A140VJL8;P29218;E5RIP7;H0YBL1;E5RG13;E5RI82;E5RGY4	IMPA1	-0.0682137	0.999915
NA	Q5D044;H0UI49;B7Z938	LAMA4	-0.107559	0.999915
NA	S4R3H4;B4DQZ7	ACIN1	0.112234	0.999915
Eukaryotic translation initiation factor 4E	Q32Q75;X5D7E3;D6RBW1;P06730	EIF4E	0.422045	0.999915
Puromycin-sensitive aminopeptidase	E9PLK3;P55786;B7Z899;B7Z4B2;B3KU93;B7Z1H4;B3KTP2;B7Z1V9	NPEPPS	-0.0428052	0.999915
Retinal dehydrogenase 1	V9HW83;V9HVX6;P00352;B4DDF8;B4DXX3;Q59EJ0	HEL-S-53e;HEL-9;ALDH1A1	-0.214076	0.999915
Glyoxylate reductase/hydroxypyruvate reductase	Q9UBQ7;Q5M7Z5;U3KQ56	GRHPR	0.0535487	0.999915
Thymidylate kinase	Q6FGU2;P23919;Q53F55;G5E9E9;H7C312;H7C3A4;H7BZ20	DTYMK	0.0623799	0.999915
Microtubule-associated protein RP/EB family member 2	A0A024RC33;Q15555	MAPRE2	0.108422	0.999915
Surfeit locus protein 4	Q5T8U5;Q5T8U7;O15260;B7Z605;B7Z8F3;B7Z7A8	SURF4	-0.11018	0.999915
Dolichyl-diphosphooligosaccharide--protein glycosyltransferase subunit 2	B2RE46;P04844;B4DJL0	RPN2	0.0401013	0.999915
Histone H1.5	P16401	HIST1H1B	-0.0638132	0.999915
Keratin, type II cytoskeletal 1	H6VRG3;H6VRG0;H6VRF8;H6VRG1;P04264;H6VRF9;CON__P04264	KRT1	0.0896692	0.999915
ATP synthase subunit gamma	B4DL14;B4DFE6	NA	0.051388	0.999915
Heterogeneous nuclear ribonucleoprotein U	B3KX72;Q00839;Q96BA7;B4DLR3;Q7Z4Q5	HNRNPU;HNRPU	0.0774382	0.999915
Agrin;Agrin N-terminal 110 kDa subunit;Agrin C-terminal 110 kDa subunit;Agrin C-terminal 90 kDa fragment;Agrin C-terminal 22 kDa fragment	A0A087X208;O00468	AGRN	-0.0754429	0.999915
Palladin	Q8WX93;B2RTX2	PALLD	0.0479278	0.999915
Dihydropteridine reductase	A0A140VKA9;P09417;B7Z415;D6RGG7	QDPR	-0.0607414	0.999915
Ubiquitin carboxyl-terminal hydrolase 24	Q9UPU5	USP24	-0.186257	0.999915
Protein arginine N-methyltransferase 5;Protein arginine N-methyltransferase 5, N-terminally processed;Protein arginine N-methyltransferase 5	O14744;B2RDD7;G3V580;B4DV00	PRMT5	0.116082	0.999915
Pentatricopeptide repeat domain-containing protein 3, mitochondrial	Q96EY7;B2RDU4	PTCD3	-0.0666815	0.999915
Sulfurtransferase;Thiosulfate sulfurtransferase	Q53EW8;Q16762;B4DVZ4	TST	0.0544796	0.999915
Thioredoxin-dependent peroxide reductase, mitochondrial	P30048;Q53HC2	PRDX3	-0.0486099	0.999915
Beta-taxilin	Q5HYH7;B2RBM1;Q8N3L3;Q5HYK6;H0UI60;H0UI61	DKFZp451B226;TXLNB;DKFZp451H216	-0.132638	0.999915
Amine oxidase [flavin-containing] A	Q53YE7;Q53EZ0;P21397;Q49A63;Q5ULA3	MAOA	0.155384	0.999915
Pleckstrin homology domain-containing family A member 6	Q5VTI5;A0A1B0GUN5;Q9Y2H5	PLEKHA6	0.0729367	0.999915
Sorbin and SH3 domain-containing protein 2	O94875;B7Z997	SORBS2	-0.0796198	0.999915
Acyl carrier protein, mitochondrial;Acyl carrier protein	O14561;H3BNK3	NDUFAB1	0.0800861	0.999915
Leucyl-cystinyl aminopeptidase;Leucyl-cystinyl aminopeptidase, pregnancy serum form	B2RAK1;Q9UIQ6	LNPEP	0.0926106	0.999915
Lysocardiolipin acyltransferase 1	B4DLE7;Q6UWP7;C9K0C3;B4DM26	LCLAT1	0.0727612	0.999915
Signal transducing adapter molecule 1	B2RAY1;Q92783;B4DZT2;A6NMU3	STAM	-0.0855456	0.999915
Short-chain specific acyl-CoA dehydrogenase, mitochondrial	E5KSD5;D4QEZ8;P16219;E5KSE7;E9PE82;B4DUH1	ACADS	-0.0893147	0.999915
Serine/threonine-protein phosphatase 2A 56 kDa regulatory subunit alpha isoform	Q15172	PPP2R5A	0.0615335	0.999915
DDRGK domain-containing protein 1	Q96HY6;A0A0A0MRX2	DDRGK1	-0.116031	0.999915
DDB1- and CUL4-associated factor 7	P61962;B4DH46;A0A087WWI6	DCAF7	0.0656464	0.999915
MICOS complex subunit MIC60	Q16891;B9A067;B4DQY2;B4DKR1;B4DT20	IMMT	0.0462739	0.999915
NA	E5KLM1;E5KLL9;E5KLM2;E5KLM0	NA	-0.0774107	0.999915
Bone morphogenetic protein 5	M9VUD0;A8K694;P22003	BMP5	0.103288	0.999915
cAMP-dependent protein kinase type II-alpha regulatory subunit	A8KAH7;A0A0S2Z472;A0A024R2W3;P13861	PRKAR2A	0.0528528	0.999915
DNA helicase;DNA replication licensing factor MCM2	B3KXZ4;P49736;B7Z8Z6;H0Y8E6;B4DSV5;Q9BWF4	MCM2	0.131509	0.999915
Alpha-crystallin B chain	V9HW27;P02511;E9PR44;A0A140G961;C3VMY8;A0A024R3B9;E9PNH7	HEL-S-101;CRYAB	-0.0793057	0.999915
Protein VAC14 homolog	Q08AM6;B4DMP4	VAC14	-0.0813733	0.999915
Histone H1.2	P16403	HIST1H1C	-0.0867442	0.999915
Protein deglycase DJ-1	V9HWC2;Q99497;K7ELW0;K7EN27	HEL-S-67p;PARK7	-0.0441351	0.999915
Rootletin	B1AKD8;Q5TZA2;A1L0S9;A1L0S8;A0A087WW81	CROCC	0.0593365	0.999915
Ras-related protein Ral-B	A0A024RAG3;P11234;C9J6B1;C9JQB3;B4E364	RALB	-0.0609756	0.999915
NA	C9JWC3	SORBS2	0.0600975	0.999915
Heterogeneous nuclear ribonucleoprotein L	Q6NTA2;P14866;B2R959;M0QXS5	HNRNPL	0.059034	0.999915
60S ribosomal protein L32	D3YTB1;A0A024R2G7;F8W727;P62910	RPL32	0.0618488	0.999915
DNA damage-binding protein 1	Q16531;F5GY55;B7Z2A1;B4DSA8;B4DZP5	DDB1	-0.058001	0.999915
Heterogeneous nuclear ribonucleoprotein A3	P51991	HNRNPA3	0.0810722	0.999915
rRNA 2-O-methyltransferase fibrillarin	Q96BS4;P22087;M0R299;M0QXL5;M0R2Q4;B4DLD4;M0R0P1	FBL	-0.0784785	0.999915
Cytochrome c oxidase subunit 6B1	P14854	COX6B1	-0.152787	0.999915
Clustered mitochondria protein homolog	I3L2B0;K7EIG1;O75153	CLUH	-0.064814	0.999915
Vitronectin;Vitronectin V65 subunit;Vitronectin V10 subunit;Somatomedin-B	D9ZGG2;P04004	VTN	0.18478	0.999915
U2 small nuclear ribonucleoprotein B	P08579;B5BTZ8	SNRPB2	-0.0908603	0.999915
Double-stranded RNA-binding protein Staufen homolog 1	A0A087X1A5;Q5JW30;A8K622;Q59F99;O95793;B3KRE0	STAU1	-0.071649	0.999915
Ubiquitin thioesterase OTUB1	F5GYN4;J3KR44;B4DPD5;Q96FW1;F5H6Q1;F5GYJ8;Q659F9	OTUB1;DKFZp564E242	0.0792017	0.999915
60S ribosomal protein L36	Q9Y3U8;J3QSB5	RPL36	0.0779376	0.999915
Splicing factor 3B subunit 6	Q9Y3B4	SF3B6	-0.0814259	0.999915
Complement component 1 Q subcomponent-binding protein, mitochondrial	Q07021;A8K651;I3L3Q7;I3L3B0	C1QBP	0.0456254	0.999915
Histone H3.2;Histone H3.1;Histone H3;Histone H3.3;Histone H3.3C	Q71DI3;P68431;B4E380;K7EK07;B2R4P9;P84243;K7EMV3;B4DEB1;B2R6Y1;A8K4Y7;K7ES00;Q6NXT2	HIST2H3A;HIST1H3A;H3F3B;H3F3A;H3F3C	-0.0715162	0.999915
Zinc-binding alcohol dehydrogenase domain-containing protein 2	Q8N4Q0;Q4G1C4	ZADH2	0.0691367	0.999915
Sperm-associated antigen 7	O75391;I3L0X5	SPAG7	-0.0918295	0.999915
LIM domain-binding protein 3	V5T7C5;O75112;B4DGP4;A0A0S2Z501	LDB3	0.0692823	0.999915
Phosphoribosylformylglycinamidine synthase	A8K9T9;A8K8N7;O15067	PFAS	-0.0636438	0.999915
Laminin subunit alpha-5	O15230	LAMA5	0.0591452	0.999915
Cytochrome b-c1 complex subunit 6, mitochondrial	Q567R0;P07919	UQCRH	-0.0648921	0.999915
Annexin;Annexin A4	V9HW59;Q6LES2;P09525;Q6P452;B4DDZ4;B4DE02;Q59FK3	HEL-S-274;ANXA4	-0.0563474	0.999915
NA	Q96DP0	NA	0.0831606	0.999915
40S ribosomal protein S30	E9PR30;P62861	FAU	0.0652893	0.999915
Programmed cell death protein 10	Q9BUL8;C9J5C3;H7C5M9;C9JSA3;C9JND6;C9J363;C9J6F3	PDCD10	0.0782185	0.999915
FACT complex subunit SSRP1	A0A024R4Z6;Q08945	SSRP1	0.0934695	0.999915
Protein FAM162A	Q96A26;F8W7Q4;E9PH05;B4DF97	FAM162A	-0.0588593	0.999915
NADH dehydrogenase [ubiquinone] 1 alpha subcomplex subunit 2	O43678	NDUFA2	0.0848327	0.999915
Serine/arginine-rich splicing factor 1	J3KTL2;Q07955;Q59FA2;A8K1L8	SRSF1	-0.0634148	0.999915
Nucleobindin-1	Q53GX6;A8K7Q1;Q02818;B4DZX0;C9JKZ2;H7BZI1	NUCB1	0.108871	0.999915
ADP-ribosylation factor-like protein 3	P36405	ARL3	0.0999764	0.999915
Nck-associated protein 1	Q9Y2A7	NCKAP1	-0.114841	0.999915
Ras-related protein Rab-14	A0A024R845;P61106;X6RFL8	RAB14	-0.0904593	0.999915
Protein phosphatase 1 regulatory subunit 7	A0A140VK83;Q15435;C9J177;H7C003;C9JD73;B5MBZ8	PPP1R7	0.0915163	0.999915
Peptidyl-prolyl cis-trans isomerase NIMA-interacting 1	Q13526;K7EN45;K7EMU7;B3KUM4	PIN1	0.054949	0.999915
39S ribosomal protein L2, mitochondrial	Q5T653;C9IY40;B4DVE2	MRPL2	-0.0809066	0.999915
Glia maturation factor beta	G3V4P8;P60983	GMFB	-0.0498907	0.999915
Interferon-induced GTP-binding protein Mx1;Interferon-induced GTP-binding protein Mx1, N-terminally processed	P20591;F8W8T1;Q8NAA8	MX1	-0.0971462	0.999915
Syntaxin-4	Q12846;B7Z425;C9JFM5	STX4;STX4A	-0.0685606	0.999915
Aldose 1-epimerase	Q96C23;Q12915;H7C320;B8ZZ75	GALM;Ibd1	0.0562168	0.999915
Rho GDP-dissociation inhibitor 1	J3KTF8;V9HWE8;J3QQX2;P52565;J3KRE2;J3QW41;A0A0S2Z3D9;J3KRY1	ARHGDIA;HEL-S-47e	-0.0982197	0.999915
Collagen alpha-1(IV) chain;Arresten	A9LSU1;Q59F15;P02462	COL4A1	0.0519523	0.999915
U6 snRNA-associated Sm-like protein LSm8	A4D0W0;O95777;F2Z2Y6;C9JIZ0;C9JNV3	LSM8	0.103491	0.999915
Acylglycerol kinase, mitochondrial	E9PC15;B4E2Z8;A4D1U5;Q53H12;E9PG39;B4DR72	AGK;FLJ10842	0.0621999	0.999915
39S ribosomal protein L40, mitochondrial	Q9NQ50	MRPL40	-0.0584595	0.999915
NADH dehydrogenase [ubiquinone] 1 alpha subcomplex subunit 5	A0A024R745;Q16718;A0A087X1G1;H7BYD0;F8WAS3;C9IZN5	NDUFA5	0.0835548	0.999915
Basal cell adhesion molecule	A0A087WXM8;I7L574;I7KDP0;G0TQY6;A0A0A1TTQ0;P50895;A0A068W6H0;K7ENU8	BCAM;LU	0.0372058	0.999915
G-rich sequence factor 1	A0A024RD99;B7Z2D8;B7Z5F9;B3KP14;H0Y8R1;F5H5I6;B7Z3R7;H0YAK1;B3KW50;Q12849	GRSF1	0.0632351	0.999915
Quinone oxidoreductase PIG3	Q53FA7;H7BZH6;B4DMQ7	TP53I3	0.0650641	0.999915
NADH dehydrogenase [ubiquinone] 1 beta subcomplex subunit 3	A0A024R413;O43676;C9JKQ2	NDUFB3	-0.0498371	0.999915
2-methoxy-6-polyprenyl-1,4-benzoquinol methylase, mitochondrial	Q5HYK3;F8VVW7;F8VVX6;F8VP53;B4DP72	COQ5	0.119367	0.999915
Dihydropyrimidinase-related protein 5	Q53SW3;Q9BPU6	DPYSL5	-0.06517	0.999915
ATP-dependent 6-phosphofructokinase, platelet type	Q01813;Q8WTZ9	PFKP	0.0431164	0.999915
Coiled-coil domain-containing protein 141	Q6ZP82;E7ERF0;B8ZZB3;C9JR62	CCDC141	-0.0627827	0.999915
Protein NipSnap homolog 1	B4DQI7;A8K4I8;Q9BPW8;H7C2U6;F8WCR5	NIPSNAP1	-0.0696832	0.999915
ADP-ribosylation factor-like protein 1	P40616;F8VYN9;B4DZG7;B4DR16	ARL1	-0.0460725	0.999915
Mitochondrial antiviral-signaling protein	Q7Z434	MAVS	0.0730386	0.999915
60S ribosomal protein L28	H0YKD8;P46779;H0YMF4;H0YLP6;Q59F34	RPL28	0.0403753	0.999915
Peptidyl-prolyl cis-trans isomerase;Peptidyl-prolyl cis-trans isomerase C	A8K2Q6;P45877	PPIC	-0.0851911	0.999915
Polypyrimidine tract-binding protein 2	Q9UKA9;B4DSU5;B4DSS8	PTBP2	-0.0905784	0.999915
40S ribosomal protein S25	P62851	RPS25	0.0829314	0.999915
Ribosome-recycling factor, mitochondrial	A0A024R850;Q96E11;X6RDS5;A0A024R855	MRRF	-0.0487893	0.999915
NA	A7MD96	SYNPO	0.0884576	0.999915
Transitional endoplasmic reticulum ATPase	V9HW80;P55072;Q96IF9;Q0IIN5;Q9NTC4	HEL-S-70;VCP;DKFZp434K0126	-0.0389883	0.999915
Interferon regulatory factor 2-binding protein-like	Q9H1B7	IRF2BPL	0.118732	0.999915
NFU1 iron-sulfur cluster scaffold homolog, mitochondrial	Q9UMS0	NFU1	-0.0542228	0.999915
60S ribosomal protein L27a	Q9BQQ5;E9PLL6;Q6NZ52;P46776;E9PJD9;E9PLX7	L27a;RPL27A	-0.052888	0.999915
Pyruvate dehydrogenase phosphatase regulatory subunit, mitochondrial	Q8NCN5;B4DZL5;A8MT40;H3BQG3	PDPR	-0.0871328	0.999915
Methylmalonyl-CoA mutase, mitochondrial	A0A024RD82;P22033;T1WHH0;B2R6K1;A0A0S2Z4X4	MUT	0.0535918	0.999915
F-actin-capping protein subunit alpha-2	Q53GE2;Q53GC7;A4D0V4;P47755;F8W9N7;A0A0D9SET8;C9JUG7;B4DE01	CAPZA2	-0.0453471	0.999915
Peroxiredoxin-1	Q06830;B2R4P2	PRDX1	0.0300519	0.999915
5-AMP-activated protein kinase subunit gamma-1	A0A024R125;P54619;F8VYY9;H0YHF8;H0YIC9	PRKAG1	-0.100313	0.999915
C-1-tetrahydrofolate synthase, cytoplasmic;Methylenetetrahydrofolate dehydrogenase;Methenyltetrahydrofolate cyclohydrolase;Formyltetrahydrofolate synthetase;C-1-tetrahydrofolate synthase, cytoplasmic, N-terminally processed	A0A024R652;P11586;F5H2F4;B7Z809	MTHFD1	0.0546463	0.999915
Eukaryotic translation elongation factor 1 epsilon-1	O43324;D6RBD7;C9J1V9;H0YAL7	EEF1E1;EEF1E1-BLOC1S5	-0.0403215	0.999915
NHL repeat-containing protein 2	Q8NBF2	NHLRC2	0.0705235	0.999915
Calcium-binding mitochondrial carrier protein Aralar2	Q53GR7;Q9UJS0;B7Z2E2	SLC25A13	-0.0608978	0.999915
Interleukin enhancer-binding factor 2	B4DY09;F4ZW62;Q12905;Q53FG3;F4ZW63	ILF2	0.0628593	0.999915
High mobility group protein HMGI-C	F5H2U8;F5H2A4;F6LHU9;Q1M183;F5H6H0;P52926;D2WHG0;A5Y0M9	HMGA2	0.0324838	0.999915
U6 snRNA-associated Sm-like protein LSm4	V9GZ56;Q9Y4Z0;M0QXB0;U3KQS7;U3KQK1	LSM4	0.0702305	0.999915
Mitochondrial carrier homolog 2	Q9Y6C9;Q53G34	MTCH2	-0.0564327	0.999915
NA	CON__Q3SX09	NA	-0.263383	0.999915
Macrophage migration inhibitory factor	I4AY87;P14174	MIF	-0.0562513	0.999915
Heat shock protein beta-8	Q9UJY1	HSPB8	0.0870014	0.999915
ATP-dependent 6-phosphofructokinase, liver type	P17858;Q7L2M7	PFKL	0.051081	0.999915
Delta-1-pyrroline-5-carboxylate dehydrogenase, mitochondrial	A0A024RAD8;P30038	ALDH4A1	-0.0484988	0.999915
14-3-3 protein eta	A0A024R1K7;Q04917;Q9H4N8;A2IDB2	YWHAH	0.0989019	0.999915
DNA topoisomerase 1	P11387;B9EG90	TOP1	0.0773918	0.999915
Proteasome subunit alpha type;Proteasome subunit alpha type-6	A0A140VK44;G3V5Z7;P60900;G3V295;G3V3I1	PSMA6	0.0572169	0.999915
Erlin-2	O94905;E5RHW4;E5RJ09	ERLIN2	0.064079	0.999915
Eukaryotic translation initiation factor 3 subunit M	Q7L2H7;H0YCQ8	EIF3M	0.0777387	0.999915
Obscurin-like protein 1	O75147;A6NN50	OBSL1	0.0716333	0.999915
Keratin, type II cytoskeletal 8	CON__P05787;P05787;Q969I0;F8VUG2;Q7L4M3	KRT8	-0.045754	0.999915
Laminin subunit alpha-1	P25391	LAMA1	0.112287	0.999915
40S ribosomal protein S4;40S ribosomal protein S4, X isoform	Q96IR1;B2R491;P62701;Q53HV1	RPS4X	-0.042218	0.999915
PDZ and LIM domain protein 3	A0A0A0MQY0;Q53GG5;A0A087WYF8	PDLIM3	0.127219	0.999915
Transcriptional coactivator YAP1	P46937;A0A024R3E4;Q86T74;H0YCI3;B4E2Y3	YAP1;DKFZp451O0517	0.0708364	0.999915
RuvB-like 2	Q9Y230;B3KNL2;M0R0Y3	RUVBL2	0.0484382	0.999915
NADH dehydrogenase [ubiquinone] 1 alpha subcomplex subunit 11	Q86Y39;K7EQ77;K7EK78;K7EP35;K7EMT4	NDUFA11	0.0548374	0.999915
Dipeptidyl peptidase 2	Q9UHL4;Q59EM4	DPP7	-0.0733186	0.999915
Cytochrome c oxidase protein 20 homolog	B3KM21;Q5RI15	FAM36A;COX20	-0.0523014	0.999915
Vacuolar protein sorting-associated protein VTA1 homolog	A0A087WY55;Q9NP79;Q9C063;Q5TGM0	VTA1	0.113867	0.999915
Sepiapterin reductase	P35270;B4DSF0	SPR	-0.112344	0.999915
Heat shock protein HSP 90-beta	A0A024RD80;P08238;B4DMA2;B4DGL0	HSP90AB1	-0.0338019	0.999915
Lamina-associated polypeptide 2, isoform alpha;Thymopoietin;Thymopentin	P42166	TMPO	0.0498679	0.999915
Radixin	B0YJ88;P35241;B7Z2S7;Q6PKD3;Q05CU6	RDX	0.0622702	0.999915
UDP-glucose 6-dehydrogenase	O60701	UGDH	0.0862892	0.999915
ATP-dependent 6-phosphofructokinase;ATP-dependent 6-phosphofructokinase, muscle type	A0A024R0Y5;P08237;A0A0S2Z4A1;Q96I60;A0A0S2Z4I1;Q7KYX9	PFKM	-0.0432555	0.999915
Protein lunapark	B7Z829;B7ZLA9;Q9C0E8;B7Z7F5	KIAA1715;LNP	-0.0908978	0.999915
Voltage-dependent calcium channel subunit alpha-2/delta-2;Voltage-dependent calcium channel subunit alpha-2-2;Voltage-dependent calcium channel subunit delta-2	C9JE82;C9JVC9;Q9NY47	CACNA2D2	0.113062	0.999915
Prohibitin-2	Q99623;J3KPX7;F5GY37;F5GWA7;B4DW05;F5H3X6	PHB2	-0.0363078	0.999915
CDGSH iron-sulfur domain-containing protein 1	A0A024QZN7;Q9NZ45	C10orf70;CISD1	-0.0354267	0.999915
Diphosphoinositol polyphosphate phosphohydrolase 2	A0A024RBD0;Q9NZJ9;F8VRL4;F8VRR0;A0A0C4DGJ4	NUDT4	0.0993607	0.999915
NADH dehydrogenase [ubiquinone] 1 alpha subcomplex subunit 10, mitochondrial	E7ESZ7;Q7Z518;A8K413;A0A087WXC5;A0A024R4B3;O95299;Q53SW4	NDUFA10	-0.0540212	0.999915
Minor histocompatibility antigen H13	A0A0S2Z5V7;Q8TCT9;A0A075B6F6;A0A0S2Z6F0	HM13	-0.103188	0.999915
Activator of 90 kDa heat shock protein ATPase homolog 1	O95433;H0YJG7;H0YJ63;G3V438	AHSA1	-0.0965149	0.999915
Methylcrotonoyl-CoA carboxylase beta chain, mitochondrial	A0A140VK29;Q9HCC0;D6RDF7;A0A0S2Z5R4	MCCC2	0.0598638	0.999915
Fructose-bisphosphate aldolase;Fructose-bisphosphate aldolase C	A0A024QZ64;P09972;B7Z3K9;B7Z1Y2;B7Z1N6;A8MVZ9;B7Z3K7;J3KSV6;J3QKP5;C9J8F3	ALDOC	-0.0582208	0.999915
Glutamine--fructose-6-phosphate aminotransferase [isomerizing] 1	Q06210	GFPT1	0.103844	0.999915
Heterogeneous nuclear ribonucleoprotein Q	Q05CK9;O60506;B2R8Z8;Q59GL1;B7Z645	SYNCRIP	0.0652028	0.999915
Midkine	E9PPJ5;E9PLM6;P21741	MDK	0.052424	0.999915
Glucosidase 2 subunit beta	A0A024R7F1;K7ELL7;B4DJQ5;P14314;A0A0S2Z4D8;A0A0S2Z4W7;A2VCQ4;A0A0S2Z4A0	PRKCSH	-0.0640573	0.999915
14-3-3 protein sigma	P31947	SFN	-0.0295088	0.999915
Basigin	B4DY23;Q54A51;P35613;B4DNE1;A0A087X2B5;I3L192;A0A087WUV8	hEMMPRIN;BSG	0.0715467	0.999915
Nucleolin	A0A024R4A0;P19338;B3KTP9;B3KM80;Q6ZS99;Q9BQ02;H7BY16	NCL	-0.0649773	0.999915
Procollagen galactosyltransferase 1	Q8NBJ5	COLGALT1	0.118304	0.999915
Histone H2A;Histone H2A type 1-C;Histone H2A type 3;Histone H2A type 1-B/E;Histone H2A type 1-A	Q08AJ9;A0A024R017;Q93077;Q7L7L0;P04908;Q96QV6	HIST1H2AB;HIST1H2AC;HIST3H2A;HIST1H2AA	0.11026	0.999915
Treacle protein	Q13428;Q59FZ2	TCOF1	-0.0761544	0.999915
Voltage-dependent anion-selective channel protein 1	P21796;B3KTS5	VDAC1	0.0367278	0.999915
Cell adhesion molecule 1	A0A087X105;A0A087WZW4;A0A087X1W8;A0A0A0MTJ8;A0A087WZR6;X5D8W0;X5DQS5;X5DQR8;X5DNF2;X5D7A8;Q9BY67;A0A087X0T8;A0A4Z1	CADM1	-0.0790764	0.999915
40S ribosomal protein S27	P42677;Q5T4L4	RPS27	-0.0438403	0.999915
Threonine--tRNA ligase, cytoplasmic	Q53GX7;P26639;B2RDX5;B4DKZ9;Q5M7Z9;B3KTN2	TARS	-0.065169	0.999915
HIV Tat-specific factor 1	O43719;B4DRS4;Q5H919;Q5H918	HTATSF1	0.0803652	0.999915
Cofilin-1	V9HWI5;P23528;G3V1A4;E9PP50;E9PK25;E9PQB7;B4E112;E9PLJ3;E9PS23	HEL-S-15;CFL1	0.0445341	0.999915
Xaa-Pro dipeptidase	J3K000;A0A140VJR2;P12955	PEPD	0.0481362	0.999915
28S ribosomal protein S25, mitochondrial	P82663;E7EPW2	MRPS25	0.075973	0.999915
O-acetyl-ADP-ribose deacetylase MACROD1	Q9BQ69	MACROD1	0.102974	0.999915
Endophilin-A2	Q9UQD4;Q6FGM0;Q99961;M0QYE0;M0R0I3	SH3GL1	0.0773254	0.999915
Plexin-B2	O15031	PLXNB2	-0.132488	0.999915
U2 small nuclear ribonucleoprotein A	Q53G61;Q53G21;P09661;H0YLR3;H0YMA0	SNRPA1	-0.116586	0.999915
E3 ubiquitin/ISG15 ligase TRIM25	Q14258	TRIM25	0.0627811	0.999915
Importin-5	A0A024RDY0;O00410;H0Y8C6;B4E0R6;B3KWG6	RANBP5;IPO5	0.0786746	0.999915
NA	H7BXR3;H7C1R7	SORBS2	0.0454746	0.999915
Eukaryotic translation initiation factor 3 subunit J	A0A024R5S5;O75822	EIF3S1;EIF3J	0.0915538	0.999915
Pyruvate kinase	A0A024R5Z9;H3BTN5;B4DRT3;Q504U3;H3BR70;A0A024R609;H3BQ34	PKM2;PKM	0.028495	0.999915
Nuclear pore complex protein Nup93	Q8N1F7;A8K897;H3BVG0	NUP93	-0.0928342	0.999915
Hemoglobin subunit alpha	D1MGQ2;P69905;U6A216;E9M4D4;I1VZV6;A0A0K2BMD8;Q4ZGM8;E1B2D1;V9H1D9;Q9BX83;Q96T46	HBA2;HBA1	0.122427	0.999915
Vigilin	B2R5V9;A0A024R4E5;Q00341;H0Y394;B4DKR8;Q6ZS03;Q96CF6	HDLBP	0.084132	0.999915
Cytochrome c oxidase subunit 8A, mitochondrial	Q53XN1;U3KQK5;P10176	COX8A	0.0584033	0.999915
Leucine-rich repeat flightless-interacting protein 2	A0A024R2K4;Q9Y608	LRRFIP2	0.112284	0.999915
DNA replication licensing factor MCM6	Q14566;Q4ZG57	MCM6	0.0774281	0.999915
LDLR chaperone MESD	Q14696	MESDC2	-0.0840482	0.999915
NA	B7Z992;B7Z2X4	NA	-0.044205	0.999915
Aspartate aminotransferase, cytoplasmic;Aspartate aminotransferase	A0A140VK69;P17174;Q2TU84;B7Z1I2	GOT1;GIG18	-0.0587194	0.999915
NA	A0A0J9YX62;C9J2C4;A7UJ17;C9JDR7;C9JDX6;F8WCZ4;C9J2P2;B4DNF1	DNAJB6	0.0630248	0.999915
Eukaryotic translation initiation factor 6	P56537	EIF6	0.104073	0.999915
39S ribosomal protein L22, mitochondrial	E7ESL0;J3KQY1;Q9NWU5	MRPL22	0.101529	0.999915
Myosin-3	P11055;Q5GJ67	MYH3	0.0717365	0.999915
Hypoxanthine-guanine phosphoribosyltransferase	Q6LET3;A0A140VJL3;P00492	HPRT1	-0.0890637	0.999915
Obscurin	A6NGQ3;Q5VST9	OBSCN	-0.043239	0.999915
Programmed cell death protein 5	O14737;K7ESJ4;K7EQA1	PDCD5	0.0790957	0.999915
Caprin-1	G3V153;B3KXU8;Q14444;E9PLA9;B4DSF8	CAPRIN1	-0.0942848	0.999915
60S ribosomal protein L23a	P62750;H7BY10;K7EJV9;K7ERT8;A8MUS3;K7EMA7	RPL23A	0.0506068	0.999915
ATP-dependent RNA helicase DDX3X	A0A0D9SFB3;A0A0D9SG12;B5BTY4;Q59GX6;A0A0D9SF53;O00571;Q5S4N1;B4DLU5	DDX3X	-0.0730439	0.999915
Hsp90 co-chaperone Cdc37;Hsp90 co-chaperone Cdc37, N-terminally processed	A0A024R7B7;Q16543;Q6FG59;K7EQA9;K7EKQ2	CDC37	-0.0880526	0.999915
V-type proton ATPase subunit d 1	B2R7M1;F5GYQ1;P61421;R4GN72;B7Z6L9;J3QL14;B7Z788	ATP6V0D1	-0.0574456	0.999915
Supervillin	O95425	SVIL	0.0594538	0.999915
Protein NipSnap homolog 3A	Q9UFN0;B4DW81	NIPSNAP3A	-0.0533611	0.999915
CD109 antigen	Q6YHK3	CD109	0.0902985	0.999915
Ig gamma-2 chain C region	Q6N093;P01859;Q6MZU6;Q68CN4	DKFZp686I04196;IGHG2;DKFZp686C15213;DKFZp686E23209	0.259067	0.999915
Calcium/calmodulin-dependent protein kinase type II subunit beta	A4D2J9;Q13554;D3DVK8;Q53H78	CAMK2B	0.0813611	0.999915
Prothymosin alpha;Prothymosin alpha, N-terminally processed;Thymosin alpha-1	B8ZZQ6;V9HVW6;Q15202;Q8TBK9;Q86YS2;Q53S24;Q15204;P06454;Q15200;B8ZZA1;B8ZZW7;H7C2N1;Q15203;Q7KZ52;Q7Z4R6	PTMA;PTMAP7	-0.137253	0.999915
Mitochondrial amidoxime reducing component 2	Q969Z3	43161	-0.0604115	0.999915
Eukaryotic initiation factor 4A-II;Eukaryotic initiation factor 4A-II, N-terminally processed	Q14240;E7EQG2;Q9NZE6;Q96B07	EIF4A2	-0.0661243	0.999915
Paralemmin-1	B2RCL4;A0A024R1Y6;O75781;A0A024R207;B7Z649;B3KMX3	PALM	0.0783298	0.999915
DnaJ homolog subfamily A member 3, mitochondrial	Q59E88;Q53G26;Q96EY1;B3KM81	DNAJA3	-0.0586206	0.999915
Thioredoxin	H9ZYJ2;P10599	TXN	0.0441069	0.999915
RNA-binding protein Musashi homolog 2	B4DHE8;Q96DH6;B4DM51	MSI2	0.0785027	0.999915
Cytochrome c oxidase subunit 6C	A0A024R9B7;P09669	COX6C	0.0852347	0.999915
Synaptic vesicle membrane protein VAT-1 homolog	A0A024R1Z6;Q99536;B3KUF8	VAT1	0.0547568	0.999915
Signal transducer and activator of transcription;Signal transducer and activator of transcription 3	B5BTZ6;P40763;G8JLH9;B4DNP0;B7ZA24;B4DVR6	STAT3	-0.0745352	0.999915
Copine-3	A0A024R994;O75131;Q05DL8;A0A087WYQ3;E5RHZ0	CPNE3	-0.0696552	0.999915
Probable Xaa-Pro aminopeptidase 3	Q9NQH7	XPNPEP3	0.100855	0.999915
Crooked neck-like protein 1	Q5JY65;Q9BZJ0;Q69YP1;Q8IXG0	CRNKL1;DKFZp762M013;crn	-0.0703394	0.999915
Eukaryotic translation initiation factor 2 subunit 2	Q6IBR8;P20042;B5BU01	EIF2S2	-0.05847	0.999915
ATP-dependent RNA helicase A	Q08211;Q58F26;Q6PJK6	DHX9	-0.0689562	0.999915
A disintegrin and metalloproteinase with thrombospondin motifs 19	Q8TE59;B3KV14	ADAMTS19	0.0798532	0.999915
Small nuclear ribonucleoprotein Sm D1	P62314;Q7Z5A3;J3QLI9	SNRPD1	-0.0409078	0.999915
Arfaptin-1	B4E273;P53367;B7ZA10;Q8N8M9	ARFIP1	-0.0940531	0.999915
Centromere protein V	Q7Z7K6	CENPV	-0.0978127	0.999915
Acyl-coenzyme A thioesterase 13;Acyl-coenzyme A thioesterase 13, N-terminally processed	Q9NPJ3	ACOT13	-0.0372951	0.999915
Low molecular weight phosphotyrosine protein phosphatase	Q59EH3;P24666;G5E9R5;A0A140VK37	ACP1	0.0443248	0.999915
Signal recognition particle 14 kDa protein	P37108;H0YLA2	SRP14	0.0518432	0.999915
Nuclear pore membrane glycoprotein 210	Q8TEM1	NUP210	0.0929144	0.999915
Heterochromatin protein 1-binding protein 3	Q5SSJ5;X6RGJ2;B0QZK4;Q5SWC8	HP1BP3	-0.0423768	0.999915
Popeye domain-containing protein 2	Q9HBU9;C9J3P7	POPDC2	-0.0627052	0.999915
Glutathione S-transferase Mu 3	Q6FGJ9;P21266;A0A0A0MTN3;A4UJ43;Q59EJ5;B4E2J2	GSTM3	0.0528695	0.999915
Proteasome subunit beta type;Proteasome subunit beta type-7	Q6IBT1;E9KL30;Q99436;Q86U62;B2RAQ9;Q5TBG5	PSMB7	0.0462172	0.999915
Creatine kinase B-type	V9HWH2;V9HW77;P12277;A0A0S2Z471;B4DP56;G3V4N7	HEL-S-29;HEL-211;CKB	-0.0457922	0.999915
LIM domain only protein 7	E9PMT2;F8WD26;F8J2B5;J3KP06;Q8WWI1;A0A0A0MTE2;H0Y424	LMO7	-0.0409265	0.999915
[Pyruvate dehydrogenase [acetyl-transferring]]-phosphatase 1, mitochondrial	B3KPZ7;A0A024R9C0;B4DYX8;Q6P1N1;Q9P0J1	PPM2C;PDP1	0.106536	0.999915
BAG family molecular chaperone regulator 3	O95817;Q53GY1;C9JFK9	BAG3	-0.0773977	0.999915
Lysine--tRNA ligase	Q15046;Q6ZTI3	KARS	-0.0608746	0.999915
Tubulointerstitial nephritis antigen-like	F6SDV2;Q9GZM7;B4DVG5	TINAGL1	0.125365	0.999915
Rab GTPase-binding effector protein 1	Q15276;B4DMM4;Q05BX6	RABEP1	0.0656854	0.999915
Serine--tRNA ligase, cytoplasmic	Q0VGA5;Q53HA4;Q5T5C7;P49591	SARS	0.109254	0.999915
Kelch-like protein 41	O60662;B2RE63;Q3ZTS6	KLHL41;SARCOSIN	0.0540777	0.999915
PDZ domain-containing protein GIPC1	A8K2I7;A0A024R7I0;O14908;K7EM11;A0A024R7I1	GIPC1	0.0601233	0.999915
Charged multivesicular body protein 4b	Q9H444	CHMP4B	0.0726287	0.999915
Eukaryotic translation initiation factor 5A;Eukaryotic translation initiation factor 5A-1;Eukaryotic translation initiation factor 5A-1-like	I3L397;I3L504;P63241;Q6IS14	EIF5A;EIF5AL1	-0.0757816	0.999915
Isoleucine--tRNA ligase, cytoplasmic	Q59G75;P41252;J3KR24;A0A0A0MSX9;Q7Z3U5;Q7Z355;Q6P0M4;B4DVX2;Q7L4K8	IARS;DKFZp686L0869;DKFZp686L17145	0.056268	0.999915
Synaptopodin-2	H0Y9Y3;B9EG60;Q9UMS6	SYNPO2	-0.0549393	0.999915
Cytoskeleton-associated protein 5	Q14008	CKAP5	-0.0601398	0.999915
Up-regulated during skeletal muscle growth protein 5	Q96IX5	USMG5	0.0367658	0.999915
NADH dehydrogenase [ubiquinone] 1 alpha subcomplex assembly factor 4	Q9P032	NDUFAF4	0.0630878	0.999915
Nuclear pore complex protein Nup155	E9PF10;B4DLT2;A0A024R071;O75694	NUP155	0.0603497	0.999915
NAD(P) transhydrogenase, mitochondrial	Q2TB59;A0A024R0C3;Q13423	NNT	-0.0368346	0.999915
UTP--glucose-1-phosphate uridylyltransferase	Q16851;B2RAN1;A0A087WYS1;E7EUC7;B4DUP2;Q53QE9	UGP2	0.0274737	0.999915
Quinone oxidoreductase	Q08257;A6NP24;C9JH92	CRYZ	-0.0443702	0.999915
Beta-2-microglobulin;Ig lambda-3 chain C regions;Ig lambda-2 chain C regions	Q8N355;Q8N5F4;Q6GMV8;Q6GMW3;Q6PJG0;A2NUT2;Q6PIQ7;Q6IPQ0;Q6GMX4;Q8TCJ5;A0A075B6L0;A0A075B6K9;Q6PJR7;S6C4S2;Q6NS95;Q7Z2U7;Q6IN99;Q567P1;A0A5E4;Q6GMX3;P0CG06;P0CG05	IGL@;DKFZp667J0810;IGLC3;IGLC2	-0.204457	0.999915
Dihydropyrimidinase-related protein 2	Q59GB4;A0A1C7CYX9;Q16555	DPYSL2	-0.037741	0.999915
Elongation factor Ts, mitochondrial	B4DHY8;E5KS95;P43897	TSFM	0.0780034	0.999915
Aspartate--tRNA ligase, cytoplasmic	A0A140VJW5;P14868;D3DP78;Q53T60	DARS	-0.0373937	0.999915
Microtubule-actin cross-linking factor 1, isoforms 1/2/3/5	H3BPE1;H3BQK9;Q9UPN3;H0Y390	MACF1	-0.0834781	0.999915
Endonuclease G, mitochondrial	E5KNL5;Q14249	ENDOG	-0.0802127	0.999915
Probable ubiquitin carboxyl-terminal hydrolase FAF-X;Ubiquitin carboxyl-terminal hydrolase	Q93008;D3DWB6	USP9X	0.0467968	0.999915
Protein disulfide-isomerase;Protein disulfide-isomerase A3	B3KQT9;V9HVY3;P30101	HEL-S-269;PDIA3	-0.0307866	0.999915
S-adenosylmethionine synthase;S-adenosylmethionine synthase isoform type-2	B4DEX8;A0A140VJP5;P31153	MAT2A	0.0398696	0.999915
Elongation factor 2	P13639;Q8TA90;B4DPU3;Q6PK56	EEF2	0.0320475	0.999915
Phosphoglucomutase-like protein 5	Q15124	PGM5	0.0614827	0.999915
Magnesium transporter protein 1	B4DH58;A0A087WU53;Q9H0U3;A8MUP5	MAGT1	-0.0462159	0.999915
Integrin beta-1-binding protein 2	Q9UKP3	ITGB1BP2	0.105889	0.999915
Keratin, type I cytoskeletal 14	CON__P02533;P02533;A0A024R1X6	KRT14	-0.183719	0.999915
Alpha-aminoadipic semialdehyde dehydrogenase	A0A1B0GTG2;A0A1B0GW77;P49419;A0A1B0GUA1;A0A1B0GW82;A0A1B0GTY9;A0A1B0GTJ4;A0A1B0GV49;A0A140T9V3;A0A0J9YWF7	ALDH7A1	0.0387087	0.999915
NA	Q7Z3B7	DKFZp451N061	-0.0404383	0.999915
Ubiquitin-conjugating enzyme E2 variant 1	Q13404;I3L0A0;G3V2F7;A0A0A0MSL3	UBE2V1;TMEM189-UBE2V1	-0.0534528	0.999915
Core histone macro-H2A;Core histone macro-H2A.2;Histone H2A	A0A024QZP6;Q9P0M6;Q9HA11;Q5SQT3	H2AFY2	0.0372117	0.999915
Endoplasmic reticulum resident protein 44	Q9BS26	ERP44	-0.0392034	0.999915
Calmodulin	B4DJ51;B2RDW0;H0Y7A7;P62158;Q9BRL5;E7ETZ0;E7EMB3;A8K1M2;Q96HY3;G3V361	CALM3;CALM2;CALM1	0.0644075	0.999915
Septin-8	B7ZVZ1;A6NMH6;A6NFQ9;F8W8I8;Q92599;A0A087X142	43351	-0.0772083	0.999915
Protein-tyrosine-phosphatase;Tyrosine-protein phosphatase non-receptor type 23	B4DST5;Q9H3S7;B4DJ12;B4DJ21	PTPN23	-0.150565	0.999915
Nascent polypeptide-associated complex subunit alpha, muscle-specific form	E9PAV3	NACA	-0.0285146	0.999915
NA	Q53G79	NA	0.0565781	0.999915
Splicing factor U2AF 65 kDa subunit	P26368;B5BU25;K7ENG2	U2AF2	-0.0864537	0.999915
Pre-mRNA-processing factor 6	O94906	PRPF6	0.0783774	0.999915
Heat shock protein beta-6	V9HWB6;O14558;B4DNC2;K7EP04	HEL55;HSPB6	0.0560248	0.999915
Signal recognition particle subunit SRP68	Q9UHB9;B4DVI7;B3KMI9;Q96K98	SRP68	-0.112849	0.999915
Phosphorylase b kinase regulatory subunit beta	Q93100	PHKB	0.15762	0.999915
ATP synthase subunit beta;ATP synthase subunit beta, mitochondrial	V9HW31;P06576;Q0QEN7;H0YH81;F8W079	HEL-S-271;ATP5B	-0.0358207	0.999915
Heat shock cognate 71 kDa protein	V9HW22;P11142;E9PKE3;Q53GZ6;Q96IS6;B3KTV0;E9PNE6;Q53HF2;A8K7Q2	HEL-S-72p;HSPA8	0.0319655	0.999915
Calumenin	Q6IAW5;O43852;B3KQF5	CALU	-0.050818	0.999915
Probable ATP-dependent RNA helicase DDX46	A8K6X3;A0A0C4DG89;Q7L014;D3DQA6	DDX46	-0.0712152	0.999915
Small glutamine-rich tetratricopeptide repeat-containing protein alpha	O43765;B4DEA6;K7EMD6	SGTA	0.0714702	0.999915
Exocyst complex component 4	Q6NX51;Q96A65;B7Z321	EXOC4	-0.0516271	0.999915
Nesprin-2	Q8WXH0;A0A0C4DGK3	SYNE2	0.078425	0.999915
T-complex protein 1 subunit delta	P50991;A8K3C3;B7Z9L0;B7Z2Z8;B7Z2F4	CCT4	0.0337244	0.999915
DAZ-associated protein 1	K7EQ55;K7EK33;A0A0S2Z569;Q96EP5;K7EQ02;Q5IRN2	DAZAP1;DAZAP1/MEF2D fusion	0.0807634	0.999915
Serine/arginine-rich splicing factor 6	Q59GY3;A8K588;Q13247;V9HVZ0	SRSF6;HEL-S-91	-0.0743108	0.999915
Tubulin beta-2B chain	Q9BVA1	TUBB2B	-0.0321665	0.999915
39S ribosomal protein L15, mitochondrial	Q9P015;B2R739;E5RIZ4;E5RHF4	MRPL15	0.0528862	0.999915
Alanine--tRNA ligase, mitochondrial	Q5JTZ9	AARS2	0.0832562	0.999915
60S ribosomal protein L23	Q9BTQ7;A0A024R1Q8;P62829;C9JD32;J3KT29;J3KTJ3;B9ZVP7	RPL23	-0.0313629	0.999915
40S ribosomal protein S27;40S ribosomal protein S27-like	H0YMV8;Q71UM5;C9JLI6	RPS27L	-0.0391609	0.999915
Coronin;Coronin-1C	Q53G58;B3KN06;A0A024RBI5;Q59EA2;Q9ULV4;B4DMH3;B4E3S0;B7Z9V0	CORO1C	0.101776	0.999915
Hemopexin	P02790;Q9BS19	HPX	-0.190467	0.999915
Apoptosis-inducing factor 1, mitochondrial	O95831;E9PMA0	AIFM1	-0.033578	0.999915
NA	D3DPG0;A0A0A0MTS7	TTN	-0.0420073	0.999915
Transforming acidic coiled-coil-containing protein 2	O95359;E7EMZ9;E9PBC6;B2RWP4;B7ZMJ9;Q4VXL8;Q4VXL4;D6RAA5	TACC2	0.15688	0.999915
28S ribosomal protein S7, mitochondrial	A0A024R8L0;J3QLS3;Q9Y2R9;J3QQS1;J3QKW2;J3KSI8	MRPS7	-0.0567579	0.999915
Manganese-transporting ATPase 13A1	A0A024R7P3;A0A024R7N2;Q9HD20	ATP13A1	0.0638994	0.999915
Transportin-1	A0A024RAM0;Q92973	TNPO1	-0.0665341	0.999915
Transcription elongation regulator 1	O14776;G3V220	TCERG1	-0.0822756	0.999915
General vesicular transport factor p115	A0A024RDG1;O60763	VDP;USO1	-0.0481752	0.999915
SRA stem-loop-interacting RNA-binding protein, mitochondrial	Q9GZT3;A0A087WUN7;H0YJ40;G3V4X6;G3V2S9;H0YJW7	SLIRP	0.0785637	0.999915
Lysophospholipid acyltransferase 5	Q6P1A2;F5H0M4	LPCAT3	0.135491	0.999915
Selenocysteine-specific elongation factor	P57772;C9J8T0	EEFSEC	-0.0663596	0.999915
2-oxoisovalerate dehydrogenase subunit beta, mitochondrial	B7ZB80;A0A140VKB3;P21953;B4E2N3;A0A0K2GN21	BCKDHB	0.0331615	0.999915
Heterogeneous nuclear ribonucleoprotein D-like	A0A087WUK2;A0A024RDF6;O14979;B4DTA2	HNRNPDL;HNRPDL	0.0736694	0.999915
Propionyl-CoA carboxylase beta chain, mitochondrial	E7EX59;E9PDR0;Q59GV0;P05166;E7EUY3;E7ETT1;C9JQS9;A0A1B2JLU8;E7ETT4;B7Z8A8;E9PEC3;F8WBI9;B7Z7U9;Q9HBR7	PCCB	-0.0367071	0.999915
T-complex protein 1 subunit epsilon	V9HW37;P48643;B4DZT5;E7ENZ3;Q9BU08;B7ZAR1;B4DDU6;B4DXI1;E9PCA1;B4DE30;B4DYC8;B4DX08;Q96GI1	HEL-S-69;CCT5	0.0378704	0.999915
Amyloid beta A4 protein;N-APP;Soluble APP-alpha;Soluble APP-beta;C99;Beta-amyloid protein 42;Beta-amyloid protein 40;C83;P3(42);P3(40);C80;Gamma-secretase C-terminal fragment 59;Gamma-secretase C-terminal fragment 57;Gamma-secretase C-terminal fragment 50;C31	H7C0V9;B4DJT9;A0A0A0MRG2;B4DQM1;E9PG40;B4DGD0;A0A140VJC8;P05067;B4DM00;B4DMD5	APP	-0.0752895	0.999915
Striatin-3	Q13033;A0AV58	STRN3	0.0673464	0.999915
Acylpyruvase FAHD1, mitochondrial	Q6P587	FAHD1	0.0367162	0.999915
Acyl-CoA synthetase family member 2, mitochondrial	Q96CM8;E9PF16;B4DTB9	ACSF2	-0.0733043	0.999915
Serum paraoxonase/arylesterase 2	B4DKM6;A0A0J9YXF2;J3QT77;A0A0J9YYG4;B4DW02;Q15165	PON2	0.0603279	0.999915
Poly [ADP-ribose] polymerase 1	A0A024R3T8;P09874;B4E0E1;B2R5W3	PARP1	0.0301873	0.999915
Mitochondrial Rho GTPase 2	Q8IXI1;I3L2C6;H3BST5	RHOT2	0.082303	0.999915
60S ribosomal protein L17	A0A087WXM6;J3QQT2;J3KRX5;A0A024R261;A0A0A6YYL6;P18621;J3QLC8;A0A0A0MRF8;J3KRB3;A0A087WWH0;J3QS96	RPL17;hCG_24487;RPL17-C18orf32	-0.0568931	0.999915
Far upstream element-binding protein 2	A0A087WTP3;Q92945;B4DV73;M0R0I5	KHSRP	0.0570803	0.999915
Dehydrogenase/reductase SDR family member 4	Q9BTZ2;D5KJA1;D5KJA2;F5GWZ1	DHRS4;DHRS4L2	-0.0746906	0.999915
Stathmin	P16949;B5BU83;A2A2D0;Q96CE4;A0A140VJW2	STMN1	0.0495503	0.999915
Prostaglandin E synthase 2;Prostaglandin E synthase 2 truncated form	B3KPZ2;Q9H7Z7;A6NHH0;B4DWP1;X6RJ95	PTGES2	0.0479785	0.999915
Cytochrome c1, heme protein, mitochondrial	Q8TBT6;P08574	CYC1	-0.0364061	0.999915
Actin-related protein 2/3 complex subunit 3	B4DM63;Q2LE71;B2R4D5;O15145;C9JZD1;F8VR50	ARPC3	0.0573638	0.999915
5-oxoprolinase	A7E261;O14841	OPLAH	-0.0309624	0.999915
NA	CON__P02662	NA	0.177094	0.999915
Carbamoyl-phosphate synthase [ammonia], mitochondrial	Q5R210;Q5R208;Q5R206;A8K134;A0A024R454;P31327;Q5R209;Q5R207	CPS1	0.0828894	0.999915
Phenylalanine--tRNA ligase alpha subunit	Q6IBR2;Q9Y285;K7ER00;K7ER16;K7EPH2	FARSLA;FARSA	-0.0543315	0.999915
Calcineurin B homologous protein 1	A0A024R9M9;Q99653;H0YKE7;F5GX29;H0YNG9;B4DSB5	CHP;CHP1	0.0694504	0.999915
Putative transferase CAF17, mitochondrial	Q5T440	IBA57	0.075184	0.999915
Glutaminase kidney isoform, mitochondrial	A8K132;O94925;Q53TX0	GLS	0.0830552	0.999915
Protein arginine N-methyltransferase 1	E9PKG1;Q5U8W9;H7C2I1;Q99873;A0A087X1W2;E9PIX6;B4DJ87	PRMT1;HRMT1L2	-0.0584241	0.999915
Tubulin gamma-1 chain;Tubulin gamma-2 chain;Tubulin gamma chain	P23258;A0A1B4Z394;Q9NRH3;K7EIS0	TUBG1;TUBG2	0.0616914	0.999915
116 kDa U5 small nuclear ribonucleoprotein component	B3KX19;Q6IBM8;Q15029;Q8IXJ3;A8KAP3;B4DZB1;B3KWY2	U5-116KD;EFTUD2;SNRP116	-0.06289	0.999915
Caseinolytic peptidase B protein homolog	A0A140VK11;Q9H078;H0YGM0;Q7Z777	CLPB	-0.0820334	0.999915
Perilipin-3	O60664;A0A140VJN8;K7ERZ3;K7EL96	PLIN3	0.0453596	0.999915
NA	A8K141	CTNNA3	0.0791534	0.999915
Chloride intracellular channel protein;Chloride intracellular channel protein 1	Q5SRT3;Q53FB0;O00299	CLIC1	0.0438214	0.999915
ELAV-like protein 1	Q15717;M0QZR9	ELAVL1	-0.0442793	0.999915
ADP-ribosylation factor 1;ADP-ribosylation factor 3	A0A024R3Q3;A0A024R0Y6;P84077;P61204;F5H423;B4E190;B4DN70;B4DEB9;B4DJC8	ARF1;ARF3	-0.033708	0.999915
GTP-binding protein RAD	A8K3J8;A0A024R6X0;P55042;Q92788	RRAD	-0.0549526	0.999915
N(G),N(G)-dimethylarginine dimethylaminohydrolase 2	V9HW53;O95865;A0A140T971;Q5SSV3;Q5SRR8;H0Y7N1	HEL-S-277;DDAH2	-0.0539005	0.999915
28S ribosomal protein S22, mitochondrial	G5E9W7;G5E9V5;P82650;Q8NBL6;A8K9Y7;H7C5F2;H7C5H3	MRPS22	0.048267	0.999915
Heterogeneous nuclear ribonucleoproteins C1/C2;Heterogeneous nuclear ribonucleoprotein C-like 4;Heterogeneous nuclear ribonucleoprotein C-like 1;Heterogeneous nuclear ribonucleoprotein C-like 3;Heterogeneous nuclear ribonucleoprotein C-like 2	G3V4W0;B4DY08;B2R5W2;G3V4C1;B2R603;A8K9A4;P07910;G3V2Q1;G3V576;B3KX96;B4DQQ2;G3V2D6;G3V5V7;D3DPI2;G3V555;G3V575;A0A0G2JPF8;A0A0G2JNQ3;P0DMR1;O60812;B7ZW38;B2RXH8	HNRNPC;hCG_1641229;HNRNPCL4;HNRNPCL1;HNRNPCL3;HNRNPCL2	-0.0422703	0.999915
Interferon-induced transmembrane protein 1;Interferon-induced transmembrane protein 2;Interferon-induced transmembrane protein 3	H7BYV1;E9PS44;E9PQN9;A0A024R210;Q6IBB0;H9NL19;H9NL12;H9NKY4;P13164;Q01629;Q01628	IFITM2;IFITM3;IFITM1	-0.0307368	0.999915
RuvB-like 1	B5BUB1;Q9Y265;E7ETR0;B3KRS7	RUVBL1	0.0349087	0.999915
Pyruvate dehydrogenase E1 component subunit beta, mitochondrial	P11177;C9J634	PDHB	0.025372	0.999915
Histone H1x	Q92522	H1FX	-0.0437697	0.999915
Transmembrane and TPR repeat-containing protein 3	A8K321;B4DZ55;Q6ZXV5	TMTC3	0.0483985	0.999915
Sarcalumenin	B4DYT9;Q86TD4;B3KPP4	SRL	0.0465176	0.999915
Heat shock protein beta-2	A8KAH6;Q16082	HSPB2	0.0329702	0.999915
Phospholipase D3	A0A024R0Q4;Q8IV08;B4DEL6	PLD3	0.054277	0.999915
Hydroxyacylglutathione hydrolase, mitochondrial	H3BPK3;B4DT01;Q16775;H3BPQ4;H3BQW8	HAGH	-0.0541326	0.999915
U1 small nuclear ribonucleoprotein 70 kDa	A0A024QZD5;P08621;A8KAQ5;M0QYR1	SNRP70;SNRNP70	0.0687152	0.999915
Myomesin-2	A0A024QZ61;P54296;E7EWH9;B4DNE9;A0A0J9YVV7	MYOM2	0.061385	0.999915
NA	CON__P02769	NA	0.0568747	0.999915
Prelamin-A/C;Lamin-A/C	P02545;Q5I6Y5;Q8N519	LMNA	-0.0267893	0.999915
Leucine-rich repeat-containing protein 59	Q96AG4	LRRC59	0.0590127	0.999915
Cytochrome c oxidase subunit 7A1, mitochondrial	Q6FGI7;P24310;K7ER11;H6SG12	COX7A1	0.0472444	0.999915
Splicing factor 1	A0A024R588;A0A024R566;B4DJU4;A0A024R5D9;A0A024R572;Q15637;B4DX42	SF1	0.0796416	0.999915
Retinol dehydrogenase 13	A0A024R4M8;Q8NBN7;B2RDH1;G8JLA1	RDH13	0.0476701	0.999915
UBX domain-containing protein 1	E9PJ81;E9PRQ7;A0A024R598;A0A024R539;Q04323;B4E0P8;Q05BV2;B4DNC6;A0A087WTZ5	UBXN1;LOC51035	0.0440426	0.999915
Propionyl-CoA carboxylase alpha chain, mitochondrial	P05165;B2RDE0;A0A1B0GU58;A0A1B0GWI4;A0A1B0GUX9;A0A1B0GWA1	PCCA	-0.0260037	0.999915
Adenylosuccinate lyase	A0A1B0GWJ0;A0A1B0GTJ7;X5D8S6;P30566;Q71UA4;X5DP48;X5D2Z4;A0A1B0GTG9;A0A1B0GWF8;B4DP46;A0A0A6YY92;A8K4X6;A0A096LNY6;A0A096LNY5;B4DUM2	ADSL	0.0927273	0.999915
Poly(ADP-ribose) glycohydrolase ARH3	Q9NX46;B4DHV5;B7ZAN4	ADPRHL2	-0.073632	0.999915
RNA binding protein fox-1 homolog;RNA binding protein fox-1 homolog 2;RNA binding protein fox-1 homolog 1;RNA binding protein fox-1 homolog 3	B0QYV1;A0A0G2JRA5;O43251;S4R469;Q8TCM0;F8VR27;F8VZY7;Q59HD3;X5DP44;B7ZLH9;B0QYY4;A0A087X2B1;F8WSN4;X5D7T5;J3KNW3;X5DNY3;B7Z1U7;F8VZG9;Q9NWB1;I3L1D4;A0A0G2JRD1;S4R3K7;A0A0G2JSB3;B0QYY7;J3QRF4;F8VRS4;A6NFN3	RBFOX2;DKFZp547L059;RBFOX1;A2BP1;RBFOX3	-0.0385682	0.999915
PDZ and LIM domain protein 1	V9HW92;O00151	HEL-S-112;PDLIM1	0.0456888	0.999915
Threonine--tRNA ligase, mitochondrial	Q9BW92;U3KQG0;Q6ST48;F6S7Q7	TARS2	0.0548039	0.999915
Actin-related protein 2/3 complex subunit 5;Actin-related protein 2/3 complex subunit 5-like protein	B3KPC7;A0A024R897;Q9BPX5	ARPC5L	-0.0722689	0.999915
Sorting nexin-3	O60493	SNX3	0.0672731	0.999915
Proline synthase co-transcribed bacterial homolog protein	D3DSW3;O94903;A8K520;E5RG77;B3KMP6;E5RFX7	PROSC	-0.0472971	0.999915
Protein FAM136A	E7EQY1;Q96C01;B0AZT6	FAM136A	0.048761	0.999915
Prosaposin;Saposin-A;Saposin-B-Val;Saposin-B;Saposin-C;Saposin-D	Q53FJ5;A0A024QZQ2;C9JIZ6;Q59EN5;P07602;B4DEK5;B4DRB7;Q5BJH1	PSAP	0.0383822	0.999915
Basement membrane-specific heparan sulfate proteoglycan core protein;Endorepellin;LG3 peptide	A0A024RAB6;P98160	HSPG2	-0.0255902	0.999915
A-kinase anchor protein SPHKAP	Q2M3C7	SPHKAP	-0.0516193	0.999915
Microtubule-associated protein 1B;MAP1B heavy chain;MAP1 light chain LC1	A0A024RAM4;P46821;A2BDK6;Q5H9P1	MAP1B;DKFZp686F1345	0.0522393	0.999915
Secernin-1	A0A090N7T9;Q12765;A0A024RA21;B4DH22;C9K052	SCRN1	-0.0327024	0.999915
Inactive hydroxysteroid dehydrogenase-like protein 1	I6L975;Q3SXM5	HSDL1	-0.0444214	0.999915
60 kDa SS-A/Ro ribonucleoprotein	A0A024R983;P10155;B3KN94	TROVE2	-0.0754965	0.999915
Putative oxidoreductase GLYR1	K7EMM8;D3DUE6;Q49A26;D3DUE7	GLYR1;N-PAC	0.0523524	0.999915
Ras-related protein Rab-9B	Q9NP90	RAB9B	0.0404511	0.999915
Calpain-1 catalytic subunit	P07384;A0A024R5A3;A0A024R580;B2RDI5;B4DWH5	CAPN1	-0.0658981	0.999915
Coiled-coil domain-containing protein 69	D3DQH5;A6NI79;H0YBY5;Q7L2X4	CCDC69	0.0702099	0.999915
NA	A0A024R152;A0A024R167;C9JVY5	hCG_28765;AKAP2	0.0346608	0.999915
Prolactin regulatory element-binding protein	Q9HCU5;B5MC98;A8K813;Q05DB2	PREB	0.065806	0.999915
Plectin	Q15149	PLEC	-0.0201886	0.999915
Polypyrimidine tract-binding protein 1	A0A0U1RRM4;P26599;A6NLN1;A0A0D9SF20	PTBP1	0.0509188	0.999915
CTP synthase;CTP synthase 2	A0A024RC00;Q9NRF8	CTPS2	-0.0852799	0.999915
Isocitrate dehydrogenase [NADP];Isocitrate dehydrogenase [NADP] cytoplasmic	V9HWJ2;O75874;Q0QER2;V9HW78;Q6FIA4;B2R5M8;Q6FI37	HEL-S-26;IDH1;HEL-216	0.0302552	0.999915
Acylamino-acid-releasing enzyme	A0A024R2U9;C9JIF9;P13798;H7C393	APEH	-0.0396009	0.999915
Heterogeneous nuclear ribonucleoproteins A2/B1	P22626;A0A087WUI2;A0A024RA28;I6L957	HNRNPA2B1;HNRPA2B1	-0.0293013	0.999915
EH domain-containing protein 4	A8K9B9;A0A024R9N6;Q9H223	EHD4	0.0314177	0.999915
DnaJ homolog subfamily B member 11	Q9UBS4;B3KW63;H7C2Y5	DNAJB11	0.0419851	0.999915
Mannose-6-phosphate isomerase	H3BPB8;P34949;H3BMZ9;Q8NHZ6;H3BPP3;H3BP57;H3BT48;H3BUZ9;B4DFC4;F5GX71;B4DW50;H3BPM5;H3BPU7;H3BU66;H3BQX0;H3BNY8;H3BT46	MPI	-0.0605919	0.999915
Cathepsin B;Cathepsin B light chain;Cathepsin B heavy chain	B4DL49;A0A024R374;P07858;A8K2H4;B4DMY4;B3KUJ8;Q6LAF9	CTSB	-0.0268132	0.999915
Importin subunit beta-1	B2RBR9;Q14974;J3KTM9;B7Z752	KPNB1	0.0261355	0.999915
NA	Q49A71;Q8NI45	COQ7	0.044592	0.999915
Cytosolic non-specific dipeptidase	B4DV28;Q96KP4;A0A024R382;B4DPF1	CNDP2	-0.0323384	0.999915
28S ribosomal protein S15, mitochondrial	P82914;D3DPS9;B4DYW3;Q59EA6	MRPS15	-0.0382828	0.999915
Inosine-5-monophosphate dehydrogenase 2	H0Y4R1;P12268;B7Z1G4;Q6QE17	IMPDH2	0.0501356	0.999915
Caveolin;Caveolin-1	Q2TNI1;Q03135;Q59E85;E9PCT5	CAV1	-0.0202345	0.999915
Inositol-3-phosphate synthase 1	A0A140VK73;Q9NPH2;B3KSG0;B7Z3K3	ISYNA1	0.0532178	0.999915
40S ribosomal protein S9	A0A024R4M0;P46781;B5MCT8;C9JM19;B7Z732;A5D904	RPS9	-0.0356352	0.999915
Splicing factor 3B subunit 3	Q15393;A8K6V3;B3KQH1	SF3B3	-0.0375109	0.999915
Phosphatidylinositol 4-kinase alpha	B4DYG5;Q4LE69;P42356;D3DX33	PIK4CA variant protein;PI4KA;hCG_1999854	0.0655931	0.999915
Pyridoxal phosphate phosphatase	A0A024R1I3;Q96GD0	PDXP	0.0382031	0.999915
26S proteasome non-ATPase regulatory subunit 3	B3KNN7;Q8N9M2;O43242;B4DEB0;Q96N86;B4DV84;Q6IBN0;B4DPM7	PSMD3	-0.0333881	0.999915
Succinyl-CoA ligase subunit beta;Succinyl-CoA ligase [GDP-forming] subunit beta, mitochondrial	A0A024R325;Q96I99;Q3ZCW5;E9PDQ8	SUCLG2	0.033918	0.999915
Proteasome activator complex subunit 2	Q86SZ7;Q2TNB3;A0A087X1Z3;Q9UL46;H0YM70;Q6FHK9	PSME2	0.0331355	0.999915
Microtubule-associated tumor suppressor 1	B4E246;Q9ULD2	MTUS1	0.0471567	0.999915
Translocation protein SEC63 homolog	B3KNE7;B3KQF0;A0A0S2Z5M1;Q9UGP8;B3KWU4	SEC63	-0.0419691	0.999915
Zinc finger RNA-binding protein	B2RNR6;Q96KR1	ZFR	0.060812	0.999915
Guanine nucleotide-binding protein G(I)/G(S)/G(O) subunit gamma-7	O60262	GNG7	-0.0753174	0.999915
S-phase kinase-associated protein 1	E5RJR5;P63208;E7ERH2;F8W8N3	SKP1	0.078516	0.999915
NA	Q6FGX3;A0A024R5H8;Q53ET8	RAB6A	-0.033359	0.999915
Glucosamine-6-phosphate isomerase 1;Glucosamine-6-phosphate isomerase	P46926;B3KMV2;A8K3S1;D6RFF8;D6R9P4;D6RAY7	GNPDA1	-0.0629392	0.999915
NA	F6WQW2;C9JDM3	RANBP1	0.0401772	0.999915
NA	L0R512	NCAM2	0.0313195	0.999915
N-alpha-acetyltransferase 15, NatA auxiliary subunit	A0A0B4J1W3;B2RBE5;Q9BXJ9;B4E2T6;Q58F05	NAA15;NARG1	-0.0637928	0.999915
Phosphoglycerate kinase;Phosphoglycerate kinase 1	V9HWF4;P00558;B4E1H9	HEL-S-68p;PGK1	0.0188542	0.999915
Profilin-1	P07737;K7EJ44	PFN1	-0.0228997	0.999915
39S ribosomal protein L45, mitochondrial	A0A087X2D5;B4DEF8;Q9BRJ2;A0A0G2JMS5;A0A087WU62	MRPL45	0.0276459	0.999915
Nitrilase homolog 1	B7Z410;Q86X76;B2R8D1	NIT1	-0.0408616	0.999915
Receptor expression-enhancing protein;Receptor expression-enhancing protein 5	B7Z6B3;B2R6C4;Q00765;B7Z2A3	REEP5	-0.0849717	0.999915
Ras-related protein Rab-24	Q969Q5;F8W8H5;Q8WY67	RAB24	0.0855318	0.999915
Calponin;Calponin-1	V9HWA5;P51911;Q53FP8;B7Z7E1;K7EQ72	HEL-S-14;CNN1	-0.0894169	0.999915
T-complex protein 1 subunit beta	V9HW96;P78371;F5GWF6;F8VQ14	HEL-S-100n;CCT2	-0.0267899	0.999915
Desmoglein-2	Q14126	DSG2	0.049192	0.999915
Very-long-chain (3R)-3-hydroxyacyl-CoA dehydratase 3	Q9P035;H3BS72;H3BPZ1	HACD3	-0.0499128	0.999915
Filamin-B	A0A024R321;O75369;Q68CT4;E7EN95	FLNB;DKFZp686A1668	-0.0578466	0.999915
Eukaryotic translation initiation factor 4 gamma 1	B4DSI9;B4DGF1;B2RU10;B2RU06;Q4LE58;Q04637;Q96I65	EIF4G1;EIF4G1 variant protein	-0.0417961	0.999915
Beta-galactosidase	Q53G40;B7Z6Q5;P16278;E7EQ29;B7Z5H9;Q53H18	GLB1	-0.108419	0.999915
FYVE and coiled-coil domain-containing protein 1	Q9BQS8	FYCO1	-0.0530619	0.999915
Eukaryotic translation initiation factor 1	Q6IAV3;K7EM18;P41567	SUI1;EIF1	-0.0348524	0.999915
Elongation factor 1-beta	A0A024R3W7;P24534;A4D1M6	EEF1B2;LOC392793	-0.0313162	0.999915
NA	K7EL81;B4DLW4	PPP1R12C	0.077564	0.999915
Cytochrome c	C9JFR7;G4XXL9;P99999	CYCS	-0.0254425	0.999915
40S ribosomal protein S17	P08708;H0YN88;A0A075B716;H0YN73	RPS17	0.0381341	0.999915
5-3 exoribonuclease 2	B4DZC3;B3KMC9;Q9H0D6;B4E0B9	XRN2	0.0445619	0.999915
Coatomer subunit gamma-2;Coatomer subunit gamma	A0A140VK12;Q9UBF2;Q9H9B7;Q9NUP3	COPG2	0.0656148	0.999915
Lamin-B1	P20700;E9PBF6;Q6DC98;A0A0D9SFE5	LMNB1	-0.0216911	0.999915
Catenin alpha-2	P26232;Q49AD3	CTNNA2	0.0652407	0.999915
Mitogen-activated protein kinase;Mitogen-activated protein kinase 14	A0A024RD15;Q16539;B4E0K5;B5TY33	MAPK14	-0.0505415	0.999915
Cullin-3	Q53S54;A0A024R475;Q13618;B7Z600	CUL3	0.0672469	0.999915
Proteasome activator complex subunit 3	K7ENH2;K9J957;V9HWJ8;A0A024R203;P61289;J7FRP4;A0A087WTV2;B3KQ25;K7ESG5;Q6FHK7	PSME3;HEL-S-283	0.0301553	0.999915
Vacuolar protein-sorting-associated protein 25	K7EKV4;A0A024R1X3;Q9BRG1	VPS25	-0.0501895	0.999915
Creatine kinase S-type, mitochondrial	A0A024RAK5;P17540;B2R8A3;B3KVA7	CKMT2	-0.0409622	0.999915
Histidine triad nucleotide-binding protein 1	P49773	HINT1	-0.0443853	0.999915
UV excision repair protein RAD23 homolog B	P54727;B4DEA3;Q53F10;B7ZA74;B7Z4W4;Q5W0S5	RAD23B	-0.0262729	0.999915
Sideroflexin-1	Q9H9B4;D6RFI0	SFXN1	0.0228704	0.999915
Keratin, type II cytoskeletal 2 epidermal	CON__P35908;P35908	KRT2	-0.0369211	0.999915
Host cell factor 1;HCF N-terminal chain 1;HCF N-terminal chain 2;HCF N-terminal chain 3;HCF N-terminal chain 4;HCF N-terminal chain 5;HCF N-terminal chain 6;HCF C-terminal chain 1;HCF C-terminal chain 2;HCF C-terminal chain 3;HCF C-terminal chain 4;HCF C-terminal chain 5;HCF C-terminal chain 6	P51610;A6NEM2	HCFC1	-0.0791521	0.999915
Polyadenylate-binding protein;Polyadenylate-binding protein 1;Polyadenylate-binding protein 3	A0A024R9C1;P11940;A0A087WTT1;E7EQV3;B4DZW4;E7ERJ7;B4DQX0;B3KT93;A0A024R9E2;H0YAR2;Q5VX58;Q3ZCS4;Q9H361	PABPC1;PABPC3	0.030312	0.999915
GrpE protein homolog 1, mitochondrial;GrpE protein homolog	Q9HAV7;B4DWV5	GRPEL1	0.0433147	0.999915
Adenylate kinase 4, mitochondrial	P27144;D3DQ64	AK4	-0.0231766	0.999915
Transcription factor A, mitochondrial	Q6LES8;E5KSX8;E5KSU5;Q00059;H7BYN3	TFAM	0.0309113	0.999915
Zyxin	Q15942;H0Y2Y8;Q96AF9;Q28617;Q9BUS0;B4DQR8;B4DY85	ZYX	-0.0699752	0.999915
Collagen alpha-2(IV) chain;Canstatin	A0A024RDW8;P08572;B4DH43	COL4A2	0.0353915	0.999915
Phosphofurin acidic cluster sorting protein 1	A0A024R5H6;Q6VY07;B4DF77	PACS1	0.033533	0.999915
Guanine nucleotide-binding protein G(i) subunit alpha-2	P04899;B3KX51;Q96C71;B3KP24;Q93020	GNAI2;WUGSC:H_LUCA16.1	-0.0189763	0.999915
Aspartate--tRNA ligase, mitochondrial	A8K4A8;A0A024R8Z9;Q6PI48;Q9H9J7;Q9NVT8	DARS2	-0.0311565	0.999915
Natriuretic peptides A;Atrial natriuretic factor	A0A087X094;P01160	NPPA	-0.0141577	0.999915
AP-2 complex subunit mu	A0A087WY71;E9PFW3;B4DNB9;Q96CW1;B4DJB1;B4DFM1;B4E304;C9JJ47;B4DTI4;B7Z4N2	AP2M1	-0.0747148	0.999915
DNA-dependent protein kinase catalytic subunit	P78527	PRKDC	0.0349464	0.999915
Platelet-activating factor acetylhydrolase IB subunit gamma	A0A024R0L6;Q15102;M0R389;M0R1K3	PAFAH1B3	0.036997	0.999915
Eukaryotic translation initiation factor 3 subunit C;Eukaryotic translation initiation factor 3 subunit C-like protein	B4DVQ5;A1KYQ7;A0A024QYU9;Q99613;B5ME19;B4DVU3;B4DDN4;B4DRU0;B4E2Z6;A0A024QYX7;B3KNZ4	EIF3C;EIF3CL	-0.0530818	0.999915
Prolyl 4-hydroxylase subunit alpha-2	Q05DA4;O15460;Q5HYD8	P4HA2;DKFZp686M0919	0.0452172	0.999915
F-box-like/WD repeat-containing protein TBL1XR1	Q9BZK7;B7Z475;A0A0D9SF63	TBL1XR1	-0.0956591	0.999915
Ferrochelatase;Ferrochelatase, mitochondrial	Q53FU1;Q7KZA3;P22830;Q5TZY0;B4DSA4;K7ELX4	DKFZp686P18130;FECH	-0.0295278	0.999915
Ubiquitin carboxyl-terminal hydrolase isozyme L3;Ubiquitin carboxyl-terminal hydrolase	A0A140VJZ4;P15374;A0A087WTB8;Q5TBK7	UCHL3	0.0535992	0.999915
Peroxiredoxin-6	V9HWC7;P30041	HEL-S-128m;PRDX6	-0.016888	0.999915
Thioredoxin, mitochondrial	B4DX69;Q99757;M0QXH0	TXN2	0.0375522	0.999915
Apolipoprotein O	H7C1U8;Q9BUR5;G3V1B6	APOO	0.0338363	0.999915
Thrombospondin-1	P07996;A0A024R9Q1;CON__Q28194	THBS1	0.0303461	0.999915
Cullin-associated NEDD8-dissociated protein 1	A8K8U1;Q86VP6;A0A0C4DGH5	CAND1	0.0333813	0.999915
Microtubule-associated protein;Microtubule-associated protein 4	E7EVA0;P27816	MAP4	0.024812	0.999915
Epoxide hydrolase 1	R4SBI6;P07099;Q6FGZ3	EPHX1	-0.0313128	0.999915
Gamma-adducin	Q5VU08;Q9UEY8;Q59EK1;Q53FL4	ADD3	0.0268876	0.999915
Ubiquitin-conjugating enzyme E2 K	B4DIZ2;P61086;D6RDM7	UBE2K	-0.0744375	0.999915
Copper chaperone for superoxide dismutase;Superoxide dismutase [Cu-Zn]	J3KNF4;O14618;E9PP76	CCS	0.0466163	0.999915
Ras-related protein R-Ras	A0A024QZF2;P10301	RRAS	0.0219662	0.999915
Cytochrome b-c1 complex subunit 9	Q9UDW1	UQCR10	0.0251582	0.999915
Protein kinase C and casein kinase substrate in neurons protein 3	A0A0C4DGG1;B4DUI2;Q9UKS6;D3DQR0;E9PIY1	PACSIN3	-0.0272955	0.999915
Periostin	A0A024RDS2;Q15063;A0A024RDT5	POSTN	-0.0931976	0.999915
Tyrosine-protein phosphatase non-receptor type;Tyrosine-protein phosphatase non-receptor type 1	A8K3M3;P18031;B4DSN5	PTPN1	-0.0442541	0.999915
Cell division cycle 5-like protein	B4DSH1;B3KY60;Q99459	CDC5L	-0.0599313	0.999915
Actin-related protein 2	P61160;Q8IY98;F5H6T1;B4DHK9;B4DWQ5	ACTR2	0.0245519	0.999915
Collagen alpha-2(VI) chain	P12110	COL6A2	-0.0395238	0.999915
Mitofusin-2	O95140;B7Z3H8	MFN2	-0.0296733	0.999915
Cleavage and polyadenylation specificity factor subunit 6	F8WJN3;Q16630;B4DSU9	CPSF6	-0.0508397	0.999915
RNA-binding protein 4;RNA-binding protein 4B	Q9BWF3;E9PB51;A8K9U0;Q9BQ04;D6R9K7;J3QRR5;E9PLB0;E9PM61;U3KQD5	RBM4;RBM4B	0.0234402	0.999915
Echinoderm microtubule-associated protein-like 1	F8W717;B7Z650;B3KXA3;O00423	EML1	0.0422769	0.999915
Cancer-related nucleoside-triphosphatase	Q5TDE9;Q9BSD7;Q5TDF0	C1orf57;NTPCR	0.0350336	0.999915
E3 UFM1-protein ligase 1	O94874	UFL1	0.0623839	0.999915
Protein QIL1	A0A140TA86;Q5XKP0;K7EIR2;A0A140TA84	QIL1;C19orf70	0.0707405	0.999915
NA	A0A087WZE9	HMGN3	0.0483468	0.999915
Protein NipSnap homolog 3B	Q9BS92;F2Z3L7	NIPSNAP3B	0.0464847	0.999915
Cytochrome b-c1 complex subunit 2, mitochondrial	P22695;H3BRG4;H3BSJ9;H3BP04	UQCRC2	0.0335079	0.999915
Serine/threonine-protein kinase MARK2	A0A140VJP1;E9PC69;Q7KZI7;A0A024R5B2;E7ETY4;A9CP04;A8K2S4;A0A024R555;F5H4F6	MARK2;Par1b	0.0514172	0.999915
Alpha-aminoadipic semialdehyde synthase, mitochondrial;Lysine ketoglutarate reductase;Saccharopine dehydrogenase	A4D0W4;Q9UDR5;F8WAH1;F8WE53	AASS	0.0295266	0.999915
Aspartyl aminopeptidase	A0A024R442;Q53SB6;E7ETB3;B7Z7F0;Q9ULA0;Q9BSS9;E7EMB6;A0A024R443;Q9NV55;Q9HAC6;B9ZVU2;F8WAN0;B7Z822;E7EPX3;C9JBE1	DNPEP	0.0319036	0.999915
NA	B7Z964;H7C3M8	SLMAP	0.0298098	0.999915
NADH dehydrogenase [ubiquinone] 1 beta subcomplex subunit 7	P17568	NDUFB7	0.0283135	0.999915
Disks large homolog 1	A0A0C4DFT3;Q12959;Q59FC4;B4DF78;E7EQD7	DLG1	0.0385222	0.999915
Aminoacyl tRNA synthase complex-interacting multifunctional protein 1;Endothelial monocyte-activating polypeptide 2	Q12904;B4DNK3	AIMP1	0.0510255	0.999915
Far upstream element-binding protein 3	A0A024R8A7;Q96I24	hCG_31253;FUBP3	-0.0417051	0.999915
Isovaleryl-CoA dehydrogenase, mitochondrial	A0A0S2Z422;A0A0A0MT83;P26440;A0A0S2Z4K7;H0YLC3;H7C4G6	IVD	0.0202684	0.999915
Protein SCO1 homolog, mitochondrial	J3QL56;O75880	SCO1	-0.0422636	0.999915
Synemin	O15061;A0A075B7B1;H0YL34	SYNM	0.0231785	0.999915
Spectrin alpha chain, non-erythrocytic 1	Q13813	SPTAN1	-0.0330366	0.999915
NADH dehydrogenase [ubiquinone] iron-sulfur protein 8, mitochondrial	O00217;A0A024R5K3;E9PPW7;Q53G17;E9PKH6;E9PN51;F8W9K7;B4DYI3	NDUFS8	-0.0599801	0.999915
Galectin;Galectin-3	Q86TY5;A0A024R693;Q59FR8;P17931;Q6FGL0;G3V3R6	hCG_22119;LGALS3	0.0223495	0.999915
Glyceraldehyde-3-phosphate dehydrogenase	V9HVZ4;P04406;Q2TSD0;E7EUT5;Q0QET7	HEL-S-162eP;GAPDH	-0.0151765	0.999915
Heat shock protein beta-1	V9HW43;P04792;B4DL87	HEL-S-102;HSPB1	-0.0170238	0.999915
ATP synthase mitochondrial F1 complex assembly factor 2	Q8N5M1;C9J2Q2	ATPAF2	0.0415069	0.999915
RNA-binding protein with multiple splicing	D3DSV0;B4E3T4;Q93062;Q569H2;H0YBU9	hCG_2043421;RBPMS	-0.0332845	0.999915
KH domain-containing, RNA-binding, signal transduction-associated protein 1	B4DDX2;Q07666;B4E043;B2R7B5	KHDRBS1	-0.0291506	0.999915
Ubiquinone biosynthesis monooxygenase COQ6, mitochondrial	Q9Y2Z9;A0A0D9SFJ1	COQ6	-0.0323759	0.999915
Ras-related protein Rab-21	A0A024RBA9;Q9UL25;Q96GX3	RAB21	0.0299633	0.999915
10 kDa heat shock protein, mitochondrial	P61604;Q9UNM1;B8ZZL8;A0A024R3X7	HSPE1;EPFP1	0.0213755	0.999915
Tight junction protein ZO-1	G3V1L9;Q07157;A9CQZ8;G5E9E7;A0A087X0K9;Q6MZU1;Q68DX9	TJP1;DKFZp686A1195;DKFZp686M05161	0.0242412	0.999915
Calcium-binding mitochondrial carrier protein Aralar1	B3KMV8;O75746	SLC25A12	0.0250007	0.999915
Enhancer of rudimentary homolog	A0A024R6D4;P84090;G3V279	ERH	0.044585	0.999915
Liprin-beta-1	A0A024RB02;Q86W92;F5GZP6;B4DFU8	PPFIBP1	-0.0424796	0.999915
Phosphatidylinositol transfer protein alpha isoform	V9HWC5;F5GWE5;Q6NUL6;Q00169;B4E1U1;I3L4H1;I3L471;I3L4C0;I3L4U7;I3L459	HEL-S-36;PITPNA	-0.0420286	0.999915
60S ribosomal protein L30	E5RI99;A0A024R9D3;P62888	RPL30	0.0286686	0.999915
Beta-2-syntrophin	A0A024R732;Q13425;H0YCS0	SNTB2	-0.0217129	0.999915
IST1 homolog	A8K5S3;P53990;H3BQF7;H3BMU1;H3BUI0;B4DLP1;F5GXM3;J3KR23;B4DHF3	IST1	0.0211548	0.999915
Probable ATP-dependent RNA helicase DDX17	H3BLZ8;Q59F66;Q92841	DDX17	0.0209522	0.999915
Ubiquitin-fold modifier 1	P61960;H0Y614	UFM1	-0.0290256	0.999915
Golgin subfamily B member 1	Q14789;E7EU81	GOLGB1	-0.0535567	0.999915
Elongation factor G, mitochondrial	E5KND5;Q96RP9;C9IZ01;D3DNL3;F8WAU4	GFM1	0.0369774	0.999915
Transaldolase	A0A140VK56;P37837;F2Z393	TALDO1	0.0215224	0.999915
Flap endonuclease 1	Q6FHX6;P39748;B4DWZ4;I3L3E9	FEN1	-0.0448773	0.999915
Rap1 GTPase-GDP dissociation stimulator 1	P52306;B3KNU0;B7Z2V8;B7Z4M5;Q6U7G8	RAP1GDS1	-0.0285296	0.999915
Adenylate kinase 2, mitochondrial;Adenylate kinase 2, mitochondrial;Adenylate kinase 2, mitochondrial, N-terminally processed	F8W1A4;A0A140VK93;P54819;F8VZG5;B4DLK2;F8VY04;G3V213	AK2	-0.0227701	0.999915
NA	A0A1B0GV45	NA	-0.0662125	0.999915
Alpha-1-syntrophin	Q13424;B3KTR0	SNTA1	0.023882	0.999915
Succinyl-CoA ligase subunit beta;Succinyl-CoA ligase [ADP-forming] subunit beta, mitochondrial	E5KS60;Q9P2R7;Q6N0B1;Q5T9Q5	SUCLA2;DKFZp686D0880	-0.0181473	0.999915
Alanine--tRNA ligase, cytoplasmic	P49588	AARS	0.0222338	0.999915
DNA-(apurinic or apyrimidinic site) lyase;DNA-(apurinic or apyrimidinic site) lyase, mitochondrial	Q5TZP7;P27695;G3V3M6;G3V5Q1;G3V3C7;A0A0C4DGK8;G3V5M0;G3V359;G3V5D9	APEX1	-0.0288279	0.999915
Histidine triad nucleotide-binding protein 2, mitochondrial	Q8WYJ5;Q9BX68;Q53HJ8	HINT2	0.0259794	0.999915
Glycylpeptide N-tetradecanoyltransferase;Glycylpeptide N-tetradecanoyltransferase 1	Q96HI4;P30419	NMT1	0.0155011	0.999915
Heterogeneous nuclear ribonucleoprotein U-like protein 2	Q1KMD3;H3BQZ7	HNRNPUL2;HNRNPUL2-BSCL2	0.0195035	0.999915
ATP-dependent RNA helicase DDX1	A3RJH1;Q92499;F1T0B3;A0A087X2G1;B4DP70	DDX1	0.0239872	0.999915
DNA-directed RNA polymerases I, II, and III subunit RPABC1	B4DJ89;A0A087WWX0;A0A087WVZ9;A0A0A0MQR7;E5KT65;P19388;A0A087WVN5	POLR2E	0.0287203	0.999915
Ras-related protein Rab-1A	Q5U0I6;P62820;E7END7;B7Z8M7	RAB1A	-0.0164043	0.999915
3(2),5-bisphosphate nucleotidase 1	V9HWF9;O95861;A6NF51;F8W1J0;B7Z9J7	HEL20;BPNT1	0.0232423	0.999915
NA	A0A024R884;Q4LE33	TNC;TNC variant protein	0.0506713	0.999915
LIM and SH3 domain protein 1	A0A024R1S8;Q14847;C9J9W2;A8K1D2;B4DIC4;B4DJI4	LASP1	0.0374133	0.999915
Troponin I, cardiac muscle	Q6FGX2;B6D427;P19429;Q6FGU5;K7EN02	TNNI3	0.0319862	0.999915
Aflatoxin B1 aldehyde reductase member 2	H3BLU7;V9HWA2;O43488	AKR7A2;HEL-S-166mP	0.0319472	0.999915
Cytochrome c oxidase subunit 4 isoform 1, mitochondrial	P13073;H3BN72;H3BNV9;H3BPG0;Q86WV2	COX4I1	-0.018976	0.999915
Electron transfer flavoprotein-ubiquinone oxidoreductase, mitochondrial	Q547S8;Q16134;B4DEQ0;A7UNU5	ETFDH	0.0277761	0.999915
Ras-related protein Rap-2c	Q9Y3L5	RAP2C	-0.028319	0.999915
Mediator of RNA polymerase II transcription subunit 23	Q5JWT2;Q9ULK4;B4E3G4;B9TX53;B9TX52;B9TX51;B9TX50;B9TX49	MED23	0.145184	0.999915
Protein phosphatase 1 regulatory subunit 12B;Protein phosphatase 1 regulatory subunit	A0A0A0MS24;O60237;A0A024R998;A0A024R9B2	PPP1R12B	0.0203169	0.999915
Activated RNA polymerase II transcriptional coactivator p15	Q6IBA2;Q59G24;P53999;B7Z1Z0	PC4;SUB1	0.0313069	0.999915
Choline-phosphate cytidylyltransferase A;Choline-phosphate cytidylyltransferase B	C9J050;C9JEJ2;P49585;D3DXB2;B4E322;H7C1T3;B2R8P1;H7BZN1;C9J2E1;Q9Y5K3	PCYT1A;hCG_2002711;PCYT1B	-0.0185717	0.999915
Cadherin-13	B7Z9B1;P55290	CDH13	-0.0650211	0.999915
Polyribonucleotide nucleotidyltransferase 1, mitochondrial	Q8TCS8	PNPT1	-0.0288619	0.999915
Mycophenolic acid acyl-glucuronide esterase, mitochondrial	Q9NUJ1	ABHD10	0.0228888	0.999915
26S protease regulatory subunit 7	A0A140VK70;P35998;Q75L23	PSMC2	-0.0133747	0.999915
Annexin A3;Annexin	P12429;D6RA82	ANXA3	0.0171176	0.999915
Alpha/beta hydrolase domain-containing protein 11	Q8NFV4;D3DXF2	ABHD11	0.0270656	0.999915
Nidogen-1	P14543	NID1	0.0141071	0.999915
Eukaryotic translation initiation factor 3 subunit D	O15371;B4E1K8	EIF3D	-0.0247214	0.999915
Spondin-1	Q9HCB6	SPON1	-0.0283536	0.999915
Neutral alpha-glucosidase AB	V9HWJ0;B4DJ30;Q14697	HEL-S-164nA;GANAB	-0.016892	0.999915
Cob(I)yrinic acid a,c-diamide adenosyltransferase, mitochondrial	B2R6J3;Q96EY8;B4DHP4;F5H4Z7;S4R3P5	MMAB	0.0194006	0.999915
Transcription elongation factor B polypeptide 1	E5RHG8;A0A024R7Y5;Q15369;R4GMY8	TCEB1	0.0274069	0.999915
NA	B4DPC0;Q9BSL6	LRRFIP1	0.0414067	0.999915
Cytoplasmic dynein 1 heavy chain 1	Q14204	DYNC1H1	0.0140479	0.999915
Leukotriene A-4 hydrolase;Leukotriene A(4) hydrolase	A0A140VK27;P09960;B4DVZ8;Q59ES1	LTA4H	0.0186672	0.999915
Importin-7	O95373;B3KQG6	IPO7	-0.0322293	0.999915
Heterogeneous nuclear ribonucleoprotein K	B4DUQ1;A0A024R228;Q6IBN1;P61978;B4DFF1;Q5T6W2	HNRPK;HNRNPK	-0.0276812	0.999915
MAPK-interacting and spindle-stabilizing protein-like	Q8NDC0	MAPK1IP1L	-0.0202624	0.999915
Glycerol-3-phosphate dehydrogenase 1-like protein;Glycerol-3-phosphate dehydrogenase [NAD(+)]	Q8N335;C9JM46	GPD1L	-0.0255333	0.999915
Insulin-degrading enzyme	P14735;Q59GA5;B7Z7W6;B3KSB8	IDE	-0.0205084	0.999915
Transformer-2 protein homolog beta	Q8N1H4;Q68DZ9;Q59GA1;B2RDQ3;P62995;H7BXF3	DKFZp686F18120;TRA2B	-0.0263695	0.999915
ELMO domain-containing protein 2	D6RBS5;Q8IZ81;V9GY58;D6RHX2	ELMOD2	-0.0391447	0.999915
Vacuolar protein sorting-associated protein 45	Q9NRW7;A0AR27;B7Z5E4;A0A087WU65;B7Z360;B7Z5D4;A0A1B0GXI6;Q5T4Q0;B7Z1J7	VPS45	-0.0248674	0.999915
Secretory carrier-associated membrane protein 3	Q6FHJ5;O14828	SCAMP3	0.0344273	0.999915
28S ribosomal protein S23, mitochondrial	J3QLR8;Q9Y3D9	MRPS23	0.0218337	0.999915
Alpha-adducin	E7EV99;E7ENY0;P35611;Q96D30;A0A0A0MSR2;Q4TT76;H0Y9H2	ADD1;LA04NC01-25A3.2-001	0.0210801	0.999915
Tubulin alpha-1B chain	B3KT06;B3KPS3;P68363;A8JZY9;B4DDU2;F8VVB9	TUBA1B	-0.0104825	0.999915
28S ribosomal protein S35, mitochondrial	P82673	MRPS35	0.0287009	0.999915
Thrombospondin type-1 domain-containing protein 4	Q6ZMP0	THSD4	-0.0353642	0.999915
ER membrane protein complex subunit 2	Q53HG5;A8K4K9;Q15006	EMC2	0.0268621	0.999915
NA	Q6IPH7	RPL14	0.0164374	0.999915
Serum amyloid P-component;Serum amyloid P-component(1-203)	V9HWP0;P02743	HEL-S-92n;APCS	-0.0658534	0.999915
U4/U6 small nuclear ribonucleoprotein Prp31	F1T0A5;Q8WWY3;E7EVX8;B4DWW8	PRPF31	-0.0156617	0.999915
Cathepsin Z	Q5U000;Q9UBR2	CTSZ	-0.0145425	0.999915
Phosphatidylethanolamine-binding protein 1;Hippocampal cholinergic neurostimulating peptide	D9IAI1;P30086;A0A0K0K1J6;B4DRT4;V9HW05	HEL-S-34;PEBP1;HEL-210	0.0138021	0.999915
Exocyst complex component 8	Q8IYI6	EXOC8	-0.0185896	0.999915
Ryanodine receptor 2	Q92736;H7BY35	RYR2	-0.0149656	0.999915
Ribosome maturation protein SBDS	A0A0S2Z5I7;Q9Y3A5;A0A087X020	SBDS	-0.0153285	0.999915
GPI transamidase component PIG-S	Q8NBL9;B2RBB2;Q96S52;Q96IR5	PIGS	0.0311435	0.999915
Actin-related protein 2/3 complex subunit 2	Q53R19;O15144;Q9BXV5;A0A024R408	ARPC2	-0.0131843	0.999915
Nicotinate-nucleotide pyrophosphorylase [carboxylating]	V9HWJ5;Q15274;C9JCJ5	HEL-S-90n;QPRT	0.0228991	0.999915
Nucleolar protein 56	O00567;A8K9K6;A0PJ92	NOP56	-0.0185474	0.999915
L-lactate dehydrogenase;L-lactate dehydrogenase B chain	Q5U077;P07195;A8MW50;C9J7H8	LDHB	0.0113794	0.999915
NA	A0A024R9B9;A0A024R9H1	MATN2	-0.0213005	0.999915
28S ribosomal protein S27, mitochondrial	G5EA06;B4DT94;A0A024RAJ1;Q92552;D6RH20;Q6PKB3;B4DKI9;Q8N6F2	MRPS27	-0.0265663	0.999915
Protoporphyrinogen oxidase	P50336;B4DY76;B3KT30;Q96TC9;H0YFP3	PPOX	-0.0286908	0.999915
2,3-cyclic-nucleotide 3-phosphodiesterase	A0A024R1T5;P09543	CNP	-0.0236348	0.999915
Serrate RNA effector molecule homolog	Q9BXP5;H7C3A1	SRRT	0.0219322	0.999915
NHP2-like protein 1;NHP2-like protein 1, N-terminally processed	Q6FHM6;P55769;B1AHD1	NHP2L1	-0.0443972	0.999915
Thiosulfate sulfurtransferase/rhodanese-like domain-containing protein 1	Q8NFU3;R4GNF9	TSTD1	0.0152208	0.999915
Proteasome subunit beta type-3	P49720;A0A087WXQ8;A0A087WY10;A0A087WUL2	PSMB3	0.0176383	0.999915
6-phosphogluconolactonase	A0A0K0K1K7;O95336;M0R261	PGLS	-0.0168532	0.999915
MOB kinase activator 1A;MOB kinase activator 1B	Q9H8S9;Q7L9L4;D6RCK3;B3KSH6;Q4W5E0	MOB1A;MOB1B;MOBKL1A;MOB4A	0.0228448	0.999915
Heterogeneous nuclear ribonucleoprotein U-like protein 1	A8K6U7;Q9BUJ2;A8K3W4;A0A024R0J9;A0A0A0MRA5;B7Z4B8;A8K5K0;M0R3F1;M0QYZ0	HNRNPUL1;HNRPUL1	0.0208334	0.999915
Ubiquitin-like modifier-activating enzyme 6	A0A024RDB0;A0AVT1;B3KSS1	UBE1L2;UBA6	-0.0311134	0.999915
Protein transport protein Sec24C	G5EA31;A0A024QZM6;P53992;B4DSN3	SEC24C	-0.0296567	0.999915
T-complex protein 1 subunit zeta	B2R9K8;A0A024RDL1;P40227;Q59ET3;A1JUI8;B4DPJ8;B4DN39	CCT6A	-0.00924449	0.999915
L-2-hydroxyglutarate dehydrogenase, mitochondrial	A8K9B2;Q9H9P8;C9JVN9	L2HGDH	-0.0261725	0.999915
ATP synthase subunit O, mitochondrial	P48047;Q53HH2;H7C0C1	ATP5O	-0.0128041	0.999915
Heat shock 70 kDa protein 4	P34932;B4DH02;V9HW33;Q59GF8;B4DUS3;B4DIZ3;B4DT47;B4E354;B4E0H6	HSPA4;HEL-S-5a	0.0146156	0.999915
Non-specific lipid-transfer protein	B2R761;P22307;B4E0J3;H0YF61	SCP2	-0.030382	0.999915
Splicing factor 3B subunit 1	O75533;Q7Z497	SF3B1	-0.019126	0.999915
Heat shock protein beta-3	Q6ICS9;Q12988	HSPB3	-0.013685	0.999915
Regulator of nonsense transcripts 1	A0A024R7L5;A0A024R7L8;Q92900	UPF1	-0.0214255	0.999915
Acyl-CoA dehydrogenase family member 9, mitochondrial	Q9H845;Q9H9W4;H0Y8Z9;Q9BUX5;Q59FN3	ACAD9	-0.0104804	0.999915
EH domain-containing protein 2	B4DLA1;A0A024R0S6;Q9NZN4;B3KUH4;Q8NCJ3	EHD2	0.0526492	0.999915
39S ribosomal protein L55, mitochondrial	A0A024R3R0;Q7Z7F7;X6R631	MRPL55	-0.0277514	0.999915
tRNA (cytosine(34)-C(5))-methyltransferase	Q08J23	NSUN2	-0.0195415	0.999915
Choline transporter-like protein 2	A0A024R798;A0A024R7D2;A0A088QF11;A0A088QCU6;Q8IWA5	SLC44A2	-0.0113487	0.999915
Aldose reductase	A0A024R7A8;P15121;Q59EL5;E9PCX2	AKR1B1	0.0128505	0.999915
Voltage-dependent anion-selective channel protein 2	A0A024QZT0;P45880;A0A0A0MR02;A0A024QZN9;B4DKM5;Q5JSD1	VDAC2	0.0097074	0.999915
Retinol dehydrogenase 14	Q53RX3;Q9HBH5	RDH14	-0.0221813	0.999915
60S ribosomal protein L4	P36578;Q53G74;B4DMJ6;H3BM89;B4DFI6;B4DMJ2	RPL4	0.00865509	0.999915
Histone H4	B2R4R0;P62805;Q0VAS5	HIST1H4H;HIST1H4A	-0.0117079	0.999915
Serotransferrin	Q53H26;Q06AH7;P02787;B4DI57;B4DHZ6	TF	0.0165426	0.999915
Bifunctional purine biosynthesis protein PURH;Phosphoribosylaminoimidazolecarboxamide formyltransferase;IMP cyclohydrolase	V9HWH7;P31939;B2R7P8	HEL-S-70p;ATIC	-0.0114125	0.999915
Troponin T, cardiac muscle	E7EPW4;A0A0A0MRJ5;A0A0A0MRJ4;P45379;Q7Z554;A0A024R953;Q15607;Q15608;E7EPN8	TNNT2;HNTN1	-0.0141803	0.999915
Proteasome subunit beta type-2;Proteasome subunit beta type	A0A140VJS6;P49721;B7Z478;Q59FJ0	PSMB2	0.0131762	0.999915
39S ribosomal protein L4, mitochondrial	K7ES61;A0A024R7C5;Q9BYD3;K7EKI4;K7ELF1;K7ELQ0	MRPL4	-0.0149768	0.999915
Pogo transposable element with ZNF domain	Q7Z3K3;B4DSK8	POGZ	-0.0160288	0.999915
Acyl-coenzyme A oxidase;Peroxisomal acyl-coenzyme A oxidase 3	B2R856;O15254	ACOX3	-0.0189775	0.999915
5-AMP-activated protein kinase subunit gamma-2	B7Z6X8;E9PGP6;A0A090N8Q6;Q9UGJ0	PRKAG2	0.015764	0.999915
Dynein light chain roadblock-type 1;Dynein light chain roadblock-type 2	B4DFR2;Q9NP97;A0A140VJH9;B1AKR6;Q8TF09	DYNLRB1;DYNLRB2	-0.0146563	0.999915
Serine/arginine-rich splicing factor 3	B2R6F3;P84103;A0A087X2D0	SFRS3;SRSF3	0.0120556	0.999915
NADH-ubiquinone oxidoreductase chain 5	Q5S9U8;A0A1B0W1F8;A0A075X6P1;Q53ZV6;H9A7H1;D7P652;D7P639;D7P626;B8X5X6;B2XIN1;A0A059RIX9;A0A023REG7;A0A023QG09;X5CM76;X5CKG0;X5CI32;X5CF88;X5CBQ3;X5BYA7;X5BWL7;X5BWF0;X5BVZ3;X5BVA2;X5BV52;X5BPC3;X2JJ49;W8DRA6;W8DIL7;W8DCA6;W8DBU7;W8DBM7;W8DAS2;W8D9V0;W8D9F9;W8D8R1;W0C6Q7;W0C3F1;V9PAU1;V9PAR5;V9PA42;V9NA48;V9N990;V9N6Q0;V9N6J1;V9N5T7;V9N4K8;V9M765;V9K141;V9JYL6;V9JXJ3;V9JTH7;V9JMS4;V9JLL5;V9JJF5;V…	ND5;NADH5;ndh5;MT-ND5	-0.0172622	0.999915
Unconventional myosin-XVIIIa	A0A0D9SFK2;A0A024QZ63;Q92614;B4DZ32	MYO18A;hCG_27198	0.0224677	0.999915
Haloacid dehalogenase-like hydrolase domain-containing protein 3	B3KUF6;A0A024R837;Q9BSH5	HDHD3	-0.0172138	0.999915
Adipocyte plasma membrane-associated protein	Q9HDC9;H0Y512	APMAP	0.0195327	0.999915
Fatty acid synthase;[Acyl-carrier-protein] S-acetyltransferase;[Acyl-carrier-protein] S-malonyltransferase;3-oxoacyl-[acyl-carrier-protein] synthase;3-oxoacyl-[acyl-carrier-protein] reductase;3-hydroxyacyl-[acyl-carrier-protein] dehydratase;Enoyl-[acyl-carrier-protein] reductase;Oleoyl-[acyl-carrier-protein] hydrolase	P49327;A0A0U1RQF0	FASN	-0.022109	0.999915
Heat shock 70 kDa protein 1B;Heat shock 70 kDa protein 1A	A8K5I0;A0A0G2JIW1;P0DMV9;P0DMV8;B4DNT8;B4DWK5;Q59EJ3;B4DFN9;B4DI39;B4E1S9;B4E388;B4DVU9;V9GZ37;B3KTT5;B4DNX1;B4E1T6	HEL-S-103;HSPA1B;HSPA1A	0.00899734	0.999915
Eukaryotic translation initiation factor 3 subunit K	Q9UBQ5;K7ES31;K7ERF1;B4DVD7;K7EQM4;U3LUI4;A0A087WVB9	EIF3K	0.0165355	0.999915
STE20-like serine/threonine-protein kinase	Q9H2G2	SLK	-0.019036	0.999915
[truncated: 165 more rows]
