# Supplementary material for: Proteomic mapping of atrial and ventricular heart tissue in patients with aortic valve stenosis
Source: Sci Rep. 2021 Dec 22;11:24389. doi: 10.1038/s41598-021-03907-3 (PMC8695579; doi:10.1038/s41598-021-03907-3)
Supplement: Supplementary file 11 — Supplementary Table 8. [file 41598_2021_3907_MOESM11_ESM.xlsx]

## Sheet: Label
Supplementary Table 8 - Frequency of signal detection in SILAC standard and tissue fraction

## Sheet: Supplementary table 8
total number of detected values per Protein in heavy / light -intensity, 92 values max
Protein ID	ProteinName	Gene name	# of detection in the heavy fraction	# of detection in the tissue fraction	difference
B3KWQ6;P41219	Peripherin	PRPH	38	89	51
V9HW34;Q6PJF2;Q6PIL8		HEL-213;IGK@	27	76	49
CON__Q86YZ3;Q86YZ3	Hornerin	HRNR	20	68	48
			47	90	43
E9PCT8;B7Z6P4;A0A0S2Z4Q1;Q16586;B7Z1L1;A0A0S2Z4P8	Alpha-sarcoglycan	SGCA	51	89	38
Q5T985;A2RTY6;D3DRR6;P19823;B4DM79	Inter-alpha-trypsin inhibitor heavy chain H2	ITIH2	12	48	36
V9HWD8;P04217;B3KP79	Alpha-1B-glycoprotein	HEL-S-163pA;A1BG	18	48	30
P02671;A0A0S2Z3E8	Fibrinogen alpha chain;Fibrinopeptide A;Fibrinogen alpha chain	FGA	61	87	26
Q86W17;Q53ZX9;Q53ZX8;Q53ZX7;Q45KI0;H0Y8D1;CON__P07477;A0A087WW55;E7EQ64;P07477;Q86W20;Q86W19;Q86W18;Q6PK75;A6XGL3;A6XMV8;A1A508;Q5NV56;Q3SY20;Q3SY19;A0A0J9YYC8;Q7Z5F3;A6XMV9;Q8NHM4;P07478	Trypsin-1;Alpha-trypsin chain 1;Alpha-trypsin chain 2;Putative trypsin-6;Trypsin-2	PRSS1;PRSS2;PRSS3;TRY8;PRSS3P2	28	52	24
A0A024R6P0;B3KS79;P01011;G3V3A0	Alpha-1-antichymotrypsin;Alpha-1-antichymotrypsin His-Pro-less	SERPINA3	37	59	22
CON__Q9QWL7			10	31	21
J3KT40;A2TDC0;O15273;A9QT26;A0A0S2Z4S5	Telethonin	TCAP	17	38	21
Q9H2A2	Aldehyde dehydrogenase family 8 member A1	ALDH8A1	20	41	21
CON__P02668			34	55	21
C9JV77;B7Z8Q2;P02765;B7Z556	Alpha-2-HS-glycoprotein;Alpha-2-HS-glycoprotein chain A;Alpha-2-HS-glycoprotein chain B	AHSG	49	70	21
E7ETN3;B4E1Z4;H7C5H1;P00751	Complement factor B;Complement factor B Ba fragment;Complement factor B Bb fragment	CFB	40	58	18
P81605	Dermcidin;Survival-promoting peptide;DCD-1	DCD	29	46	17
V9HW83;V9HVX6;P00352;B4DDF8;B4DXX3;Q59EJ0	Retinal dehydrogenase 1	HEL-S-53e;HEL-9;ALDH1A1	65	82	17
S0F3J2;S0F2J8;A0A0M3LCZ3;G9HWB7;G1EMY8;D7GN73		HLA-DRB1	5	19	14
B2R6V9;P00488;B4E2L8	Coagulation factor XIII A chain	F13A1	7	21	14
Q5JWT2;Q9ULK4;B4E3G4;B9TX53;B9TX52;B9TX51;B9TX50;B9TX49	Mediator of RNA polymerase II transcription subunit 23	MED23	68	82	14
E7ENL6;B7ZW00;Q59F25		COL6A3	70	84	14
B2RBQ4;A0A0A0MRN9;Q9GZV1;Q5T457	Ankyrin repeat domain-containing protein 2	ANKRD2	17	30	13
C9J2C0;Q9NY65;Q7Z3M3	Tubulin alpha-8 chain	TUBA8;DKFZp686L04275	71	84	13
B2R773;A8K660;Q15848	Adiponectin	ADIPOQ	10	22	12
CON__P13647;P13647;B4E1T1;F8W0C6;B4DL32	Keratin, type II cytoskeletal 5	KRT5	27	39	12
B4DVF1;Q06278	Aldehyde oxidase	AOX1	30	42	12
CON__P15497			39	51	12
Q8N355;Q8N5F4;Q6GMV8;Q6GMW3;Q6PJG0;A2NUT2;Q6PIQ7;Q6IPQ0;Q6GMX4;Q8TCJ5;A0A075B6L0;A0A075B6K9;Q6PJR7;S6C4S2;Q6NS95;Q7Z2U7;Q6IN99;Q567P1;A0A5E4;Q6GMX3;P0CG06;P0CG05	Beta-2-microglobulin;Ig lambda-3 chain C regions;Ig lambda-2 chain C regions	IGL@;DKFZp667J0810;IGLC3;IGLC2	69	81	12
CON__P02663			70	82	12
A0A0U1RQV3;B4DWH0;A0A0S2Z3V1;Q59G97;B2R6M6;A8KAJ3;A0A0S2Z4F1;Q12805;Q53TA7;B3KS53	EGF-containing fibulin-like extracellular matrix protein 1	EFEMP1	70	82	12
B5MCI0;B3KS32		SMTN	16	27	11
P06727;Q13784	Apolipoprotein A-IV	APOA4	24	35	11
CON__P01966			50	61	11
A0A0S2Z4H2;P23297;Q5T7Y5;Q5T7Y4;Q5T7Y6	Protein S100-A1;Protein S100	S100A1	70	81	11
B7Z9B1;P55290	Cadherin-13	CDH13	71	81	10
A3KPE2;B0YIW2;P02656	Apolipoprotein C-III	APOC3	74	84	10
CON__Q3SX09			78	88	10
B4E1B2			3	12	9
E5RFE7;E5RHP7;V9HWE3;P00915;E5RJI8;E5RH81;H0YBE2;E5RJF6;E5RG81	Carbonic anhydrase 1	CA1;HEL-S-11	13	22	9
B7Z524;H0YDX7;J3QT46;D9YZV0;B3KNB9;A8K9E1;Q9Y450;E9PHZ9;B7Z1K2	HBS1-like protein	HBS1L	14	23	9
A0A140VK00;P25311;C9JEV0	Zinc-alpha-2-glycoprotein	AZGP1	15	24	9
E9KL23;P01009	Alpha-1-antitrypsin;Short peptide from AAT	SERPINA1	58	67	9
B4DLA1;A0A024R0S6;Q9NZN4;B3KUH4;Q8NCJ3	EH domain-containing protein 2	EHD2	60	69	9
Q6MZW0;Q9UP60;Q8NCL6;Q96K68;Q6N090;P01876;Q8WY24	Ig alpha-1 chain C region	DKFZp686J11235;SNC73;DKFZp686G21220;IGHA1	73	82	9
A0A0X9V9B3			6	14	8
P52948;A0A024RCC4;H7C3P6;A8KA17	Nuclear pore complex protein Nup98-Nup96;Nuclear pore complex protein Nup98;Nuclear pore complex protein Nup96	NUP98	8	16	8
Q9UKX2	Myosin-2	MYH2	8	16	8
G4V2I9;G4V2I8;E2RVJ0;P02730;G4V2I7;A0A0A0MS98	Anion exchange protein;Band 3 anion transport protein	SLC4A1	9	17	8
S6BGE0			17	25	8
Q8TCF0;P18428	Lipopolysaccharide-binding protein	LBP	20	28	8
C9JC84;P02679;A0A140VJJ6;C9JEU5;D3DP16;Q7Z664	Fibrinogen gamma chain	FGG;DKFZp779N0926	78	86	8
B3KW70;F5GYX4;H0YG03;A8K3H0;Q13361;H0YGS3	Microfibrillar-associated protein 5	MFAP5	80	88	8
Q59EG0			10	17	7
A6XMH1;A0A087WV45;E9KL36;A6XGL1;P02766;A0A087WT59	Transthyretin	TTR;HEL111	43	50	7
Q6EZE9;P59666;P59665	Neutrophil defensin 3;HP 3-56;Neutrophil defensin 2;Neutrophil defensin 1;HP 1-56;Neutrophil defensin 2	DEFA3;DEFA1	44	51	7
B2R8I2;P04196	Histidine-rich glycoprotein	HRG	60	67	7
V9HWA4;B2RCQ6;Q93088;B4DPF0;E5RJH0	Betaine--homocysteine S-methyltransferase 1	HEL-S-61p;BHMT	66	73	7
B7Z539;B7Z549;P19827;F8WAS2	Inter-alpha-trypsin inhibitor heavy chain H1	ITIH1	75	82	7
S6BAM6			3	9	6
Q6ZV30;Q7Z5G3;Q9NUB1;Q658X4	Acetyl-coenzyme A synthetase;Acetyl-coenzyme A synthetase 2-like, mitochondrial	ACSS1;DKFZp666G0810	6	12	6
P49247;Q53R32	Ribose-5-phosphate isomerase	RPIA	8	14	6
Q16853	Membrane primary amine oxidase	AOC3	28	34	6
A0A075B6N8;Q8NF17;Q6N030;Q5EBM2;P01860;Q86TT2	Ig gamma-3 chain C region	IGHG3;FLJ00385;DKFZp686I15212	39	45	6
D3GKD8;P69891;Q14476;B7UCU6;Q14474;D9YZU8;Q14403	Hemoglobin subunit gamma-1	HBG1;HBG2	4	9	5
O95393	Bone morphogenetic protein 10	BMP10	7	12	5
Q5U651;Q8IUR2	Ras-interacting protein 1	RASIP1	12	17	5
Q59EE6;G3V511;G3V3X5;Q6AZ94;Q14767	Latent-transforming growth factor beta-binding protein 2	LTBP2	22	27	5
Q6MZX7;P01861	Ig gamma-4 chain C region	DKFZp686M24218;IGHG4	32	37	5
A0A024RDI5;P00325;B4E2R9;F5HB16;V9HW50;D6RHZ6;B7ZB36;B4E1R1;P07327	Alcohol dehydrogenase 1B;Alcohol dehydrogenase 1A	ADH1B;HEL-S-117;ADH1A	35	40	5
CON__Q3ZBS7			44	49	5
Q6FH10;P07585;H0YIH3;F8VNV6;A0A024RBG6	Decorin	DCN	49	54	5
B4DEA1;Q8IWW8	Hydroxyacid-oxoacid transhydrogenase, mitochondrial	ADHFE1	51	56	5
Q7Z532;A8K0R3;B4DI63;P20774;Q5TBF5	Mimecan	OGN	81	86	5
Q9UNL6;E7CYP2;D9YZU9;D3GKD9;P69892;E9PBW4	Hemoglobin subunit gamma-2	HBG2	1	5	4
B4DHS0;A9UK02;A8K4V6;Q9Y3C4	EKC/KEOPS complex subunit TPRKB	TPRKB	8	12	4
A0A024R962;P08603;A0A024R984;A8K5T0;Q14006	Complement factor H	hCG_40889;CFH;HF	10	14	4
A0A140VKF3;P36955	Pigment epithelium-derived factor	SERPINF1	13	17	4
D3YTG3;Q5JPC9;B4DSV9;H0Y897;Q7Z7G0	Target of Nesh-SH3	ABI3BP;DKFZp667H216	13	17	4
Q9BUM6			14	18	4
F5GY80;B7Z550;F5H7G1;B7ZA94;B7Z555;A8K9M5;P07358	Complement component C8 beta chain	C8B	26	30	4
B7ZKU7;B2RBN7;Q9H6U6;K7ESE9	Breast carcinoma-amplified sequence 3	BCAS3	36	40	4
CON__Q5XQN5			39	43	4
B4DK82;A0A024R577;O76062;H0YEN6;E9PS18;E9PRQ1;E9PS09;E9PLS9;E9PLI3	Delta(14)-sterol reductase	TM7SF2	51	55	4
Q6N093;P01859;Q6MZU6;Q68CN4	Ig gamma-2 chain C region	DKFZp686I04196;IGHG2;DKFZp686C15213;DKFZp686E23209	67	71	4
Q86V58;B7Z9B8;P98095;B7Z6T9;Q9Y3V7	Fibulin-2	FBLN2;DKFZp586A1519	72	76	4
CON__P02666			74	78	4
Q07507	Dermatopontin	DPT	76	80	4
B7Z8R6;P02760;S4R3Y4;S4R471	Protein AMBP;Alpha-1-microglobulin;Inter-alpha-trypsin inhibitor light chain;Trypstatin	AMBP	82	86	4
P51884;Q53FV4	Lumican	LUM	83	87	4
A0A087X0K0;P39059;B3KTP7	Collagen alpha-1(XV) chain;Restin;Restin-2;Restin-3;Restin-4	COL15A1	87	91	4
Q14894;I3L325;I3NI53;I3L2W5	Ketimine reductase mu-crystallin	CRYM	88	92	4
A0A125QYY5;A2MYE2;A2MYE1;Q9UL81;Q96SA9;A0A125QYY3;A0A109PW65;A0A0X9UWJ6;A0A0X9USN3;Q9UL77;Q9UL70;A2NI60;A0A109PW33;P01594;P01593	Ig kappa chain V-I region AU;Ig kappa chain V-I region AG	A30	6	9	3
Q59G96			9	12	3
D6RAA6;A6QKW0;A0A024R9W7;P57088	Transmembrane protein 33	TMEM33;SHINC3	12	15	3
A0AVL2		NRAP	13	16	3
Q9H6N6	Putative uncharacterized protein MYH16	MYH16	14	17	3
Q59FS1;B2RMS9;B7ZKJ8;Q14624;Q68DH2;B7Z551;H7C0L5;B7Z544;B7Z8Q7	Inter-alpha-trypsin inhibitor heavy chain H4;70 kDa inter-alpha-trypsin inhibitor heavy chain H4;35 kDa inter-alpha-trypsin inhibitor heavy chain H4	ITIH4;DKFZp686G21125	17	20	3
B7ZLK2;B7ZLK1;A0A024RB03;Q86YS7	C2 domain-containing protein 5	KIAA0528;C2CD5	18	21	3
A0A024RBK4;O14545;F8VWK2;F8VVF3;F8VNX8	TRAF-type zinc finger domain-containing protein 1	TRAFD1	24	27	3
Q69YL0	Uncharacterized protein NCBP2-AS2	NCBP2-AS2	27	30	3
A0A024R3E3;P02647;F8W696	Apolipoprotein A-I;Proapolipoprotein A-I;Truncated apolipoprotein A-I	APOA1	29	32	3
A0A1B0GVU9;Q96AW5;Q9BUZ3;B4DDN1;Q9H3A5;H7C0R3		QARS	30	33	3
P02792;Q6S4P3;B1Q3B3	Ferritin light chain;Ferritin	FTL	36	39	3
Q6J1Z7		HBB	40	43	3
O75339	Cartilage intermediate layer protein 1;Cartilage intermediate layer protein 1 C1;Cartilage intermediate layer protein 1 C2	CILP	41	44	3
A0A0S2Z530;B4DUL3			41	44	3
P37802;X6RJP6	Transgelin-2	TAGLN2	44	47	3
Q53FG6;B3KUJ0;Q15427;Q5SZ64	Splicing factor 3B subunit 4	SF3B4	45	48	3
CON__P00711			46	49	3
A0A024RDL8;P04424;A0A0S2Z316;B4DU69;A0A0S2Z3B0;F8W943	Argininosuccinate lyase	ASL	51	54	3
P62072	Mitochondrial import inner membrane translocase subunit Tim10	TIMM10	62	65	3
CON__P02533;P02533;A0A024R1X6	Keratin, type I cytoskeletal 14	KRT14	67	70	3
V9HWH9;P31949;B2R5H0	Protein S100;Protein S100-A11;Protein S100-A11, N-terminally processed	HEL-S-43;S100A11	71	74	3
A0A140VKE1;D6W5E6		UGP2	73	76	3
Q9Y5J9;G3XAN8	Mitochondrial import inner membrane translocase subunit Tim8 B	TIMM8B	74	77	3
P02790;Q9BS19	Hemopexin	HPX	78	81	3
E7DVW4;P15090	Fatty acid-binding protein, adipocyte	FABP4	78	81	3
B2RE70;A8K3K5;Q13326	Gamma-sarcoglycan	SGCG	79	82	3
Q53GK6;Q53G76;Q1KLZ0;P60709;B4E335;Q8WVW5;Q53G99;B4DW52;B3KWQ3;Q6PJ43;B7ZAP6	Actin, cytoplasmic 1;Actin, cytoplasmic 1, N-terminally processed	PS1TP5BP1;ACTB;ACTG1	79	82	3
A0A125QYY6;A0A0X9UWL5;A0A0X9TDD0			0	2	2
B6V6K7;B6ECI7;B4DV44;Q8N854;B4DVZ2;B6V6K6;A0A0S2Z421;Q99972	Myocilin;Myocilin, N-terminal fragment;Myocilin, C-terminal fragment	MYOC	0	2	2
B2R4M6;P06702	Protein S100;Protein S100-A9	S100A9	1	3	2
CON__Q5D862;Q5D862	Filaggrin-2	FLG2	1	3	2
B3KQA8;A0A024R6G3;G3V4U0;G3XA98;Q86TV4;Q9UBX5	Fibulin-5	FBLN5	2	4	2
Q6SZW1;Q0D2N8;Q05B42	Sterile alpha and TIR motif-containing protein 1	SARM1	3	5	2
L8E853;P04275	von Willebrand factor;von Willebrand antigen 2	VWF	4	6	2
A0A024R611;Q59G88;P31146	Coronin;Coronin-1A	CORO1A	4	6	2
Q701L7;CON__Q9NSB4;Q9NSB4	Keratin, type II cuticular Hb2	KRTHB2;KRT82	4	6	2
A0N071;P02042;Q4F786;D1MGQ0;E9PFT6;E9PEW8;Q14485	Hemoglobin subunit delta	HBD	5	7	2
B2ZGL7;A0A0C4DFN3;Q99685;C9JAM4;H7C599;H7C4E0;Q2VYF8;E7EWX8	Monoglyceride lipase	MGLL	5	7	2
CON__O76009;O76009;CON__Q6NTB9	Keratin, type I cuticular Ha3-I	KRT33A	6	8	2
P07360;Q5SQ08	Complement component C8 gamma chain	C8G	8	10	2
Q6P528;Q9BXN1	Asporin	ASPN	13	15	2
Q9NT22	EMILIN-3	EMILIN3	17	19	2
H3BM67;H3BUP2;H3BUN4;Q5TZN6;O60936;H3BQJ5	Nucleolar protein 3	NOL3	24	26	2
B4E1C6;B4DPT5;P24298	Alanine aminotransferase 1	GPT	25	27	2
Q5T5U6;P49903	Selenide, water dikinase 1	SEPHS1	27	29	2
CON__P78386;P78386;F5GYI5;B7Z7N3	Keratin, type II cuticular Hb5	KRT85	28	30	2
Q13976;A0A0A0MSB3	cGMP-dependent protein kinase 1	PRKG1	30	32	2
A0A087WYN9;Q7Z478	ATP-dependent RNA helicase DHX29	DHX29	33	35	2
Q9BV73	Centrosome-associated protein CEP250	CEP250	33	35	2
Q14232;F5H0D0	Translation initiation factor eIF-2B subunit alpha	EIF2B1	33	35	2
B4DWU6;B4DRR0;CON__P48668;CON__P02538;A8K2I0;A0A0S2Z428;P48668;P02538;B4DRU6;B2R853;CON__P04259;B4DRY0;B4DKV4	Keratin, type II cytoskeletal 6C;Keratin, type II cytoskeletal 6A	KRT6C;KRT6A	39	41	2
Q5T6U8;Q6IPL9		HMGA1	40	42	2
B2RD36;Q96DG6	Carboxymethylenebutenolidase homolog	CMBL	41	43	2
J3KRT0;J3KS23;A0A024R6X2;A8K719;Q13951	Core-binding factor subunit beta	CBFB	47	49	2
A0A0D9SFG6;Q99418;Q59F87;F8W8E2;Q15795;G5E9B7;M0R2J0	Cytohesin-2	CYTH2	48	50	2
A0A0J9YYJ7;A0A0J9YW50;A0A0J9YY01			50	52	2
A0A024R978;Q9BZQ8	Protein Niban	C1orf24;FAM129A	51	53	2
B3KS18;B4DDX1;B3KQ71;B4DWL6;Q9H4A6	Golgi phosphoprotein 3	GOLPH3	54	56	2
F8W0P7		ATP5B	60	62	2
A6NLH6;Q53HE6;Q9P003	Protein cornichon homolog 4	CNIH4	60	62	2
B4DG42;A0A024R4N0;Q96S97;C9JJV6;C9JZL8;C9J5M0;C9JC07	Myeloid-associated differentiation marker	hCG_1640809;MYADM	63	65	2
Q7Z7K0;H7C3D8	COX assembly mitochondrial protein homolog	CMC1	64	66	2
Q92629	Delta-sarcoglycan	SGCD	65	67	2
V9HWP0;P02743	Serum amyloid P-component;Serum amyloid P-component(1-203)	HEL-S-92n;APCS	67	69	2
A6N933;A6N931		MYH7	68	70	2
E9PMB9;B2R995;Q16798	Malic enzyme;NADP-dependent malic enzyme, mitochondrial	ME3	70	72	2
P46199;Q6P1N2;Q8IWH1	Translation initiation factor IF-2, mitochondrial	MTIF2	71	73	2
Q15772	Striated muscle preferentially expressed protein kinase	SPEG	73	75	2
Q6MZS5		DKFZp686A13234	73	75	2
Q15286;F5H157	Ras-related protein Rab-35	RAB35	76	78	2
Q8NDC0	MAPK-interacting and spindle-stabilizing protein-like	MAPK1IP1L	77	79	2
A4D0Z3;P84085;C9J1Z8;B4DLJ3	ADP-ribosylation factor 5	ARF5	77	79	2
Q8IVF2	Protein AHNAK2	AHNAK2	79	81	2
P16402	Histone H1.3	HIST1H1D	80	82	2
O75937	DnaJ homolog subfamily C member 8	DNAJC8	83	85	2
P11387;B9EG90	DNA topoisomerase 1	TOP1	85	87	2
Q96C23;Q12915;H7C320;B8ZZ75	Aldose 1-epimerase	GALM;Ibd1	86	88	2
Q969G5;E9PIE3	Protein kinase C delta-binding protein	PRKCDBP	86	88	2
Q5R210;Q5R208;Q5R206;A8K134;A0A024R454;P31327;Q5R209;Q5R207	Carbamoyl-phosphate synthase [ammonia], mitochondrial	CPS1	87	89	2
Q6FHG6;P51888;Q7Z4B2	Prolargin	PRELP;MST161	87	89	2
O43324;D6RBD7;C9J1V9;H0YAL7	Eukaryotic translation elongation factor 1 epsilon-1	EEF1E1;EEF1E1-BLOC1S5	89	91	2
A0A0S2Z3X8;P31150;B4DHX4;B4DH24	Rab GDP dissociation inhibitor alpha	GDI1	90	92	2
B4DQN9			0	1	1
Q13884	Beta-1-syntrophin	SNTB1	0	1	1
Q6ZS96;E7EPC3;O14905;I3L0L8	Protein Wnt;Protein Wnt-9b	WNT9B	0	1	1
Q96JD0;Q5NV88;Q96JD1;P01721	Ig lambda chain V-VI region AR	V1-22	0	1	1
CON__P41361			1	2	1
Q6GMX6;A0A0A0MS08;S6B291;Q6N089;A8K008;Q6N095;Q6MZQ6;Q5EFE5;Q6N094;Q6N097;P01857;A0A0A0MS07;S6AWD9;S6BGE5	Ig gamma-1 chain C region	IGH@;IGHG1;DKFZp686P15220;DKFZp686K03196;DKFZp686G11190;DKFZp686O01196;DKFZp686H20196	1	2	1
C9JGI3;E5KRG5;B2RBL3;P19971	Thymidine phosphorylase	TYMP;hCG_1988078	2	3	1
B2MUD5;P08246	Neutrophil elastase	ELA2;ELANE	2	3	1
CON__P08779;P08779	Keratin, type I cytoskeletal 16	KRT16	2	3	1
M0QYU7;M0QXT0;Q15853	Upstream stimulatory factor 2	USF2	2	3	1
G5E9F5;A0A0S2Z469;B5MC53;B5MCF8;A0A0S2Z3Z9;P39210;A0A0S2Z466;F8WEL3;B5MC10;A8MTD3;E7EX18	Protein Mpv17	MPV17	3	4	1
CON__P02584			3	4	1
CON__O43790;B4DN72;O43790;A8K872;A0A087X106;Q14533	Keratin, type II cuticular Hb6;Keratin, type II cuticular Hb1	KRT86;KRT81	4	5	1
Q05CF8;B4DPP8;D3DNU8;B4E1C2;P01042	Kininogen-1;Kininogen-1 heavy chain;T-kinin;Bradykinin;Lysyl-bradykinin;Kininogen-1 light chain;Low molecular weight growth-promoting factor	KNG1	4	5	1
Q05CN4;G5EKE5	Tyrosine-protein kinase receptor	PPFIBP1;PPFIBP1-ALK	5	6	1
A0A087WYJ9;A0A075B6N9;A0A1B0GUU9;P01871;Q86TT1	Ig mu chain C region	IGHM	7	8	1
B4DUJ3;B4DUJ8;V9HWA3;A0A024R825;P07451;E5RHI4	Carbonic anhydrase 3	HEL-S-167mP;CA3	7	8	1
Q1L5Z9;B7ZKY9	LON peptidase N-terminal domain and RING finger protein 2	LONRF2	7	8	1
Q13796	Protein Shroom2	SHROOM2	7	8	1
A6NHN7;A6NHB5;Q14202;A8K3Z7;A6NL54	Zinc finger MYM-type protein 3	ZMYM3	7	8	1
Q8N6G6;Q6MZQ3	ADAMTS-like protein 1	ADAMTSL1;DKFZp686L03130	8	9	1
Q15599;Q6NTG0;H3BUQ9;H3BN50;H3BQS0	Na(+)/H(+) exchange regulatory cofactor NHE-RF2	SLC9A3R2	8	9	1
Q5IWS5;Q8WWA0;Q8WWU7	Intelectin-1;Intelectin-2	ITLN1;ITLN2	8	9	1
B4DDQ8			8	9	1
P07357	Complement component C8 alpha chain	C8A	9	10	1
Q9BV81	ER membrane protein complex subunit 6	EMC6	9	10	1
K7EJF1		CHAF1A	9	10	1
Q2NL95;Q53G16;F6QDS0;A0A0U4B4U6;H3BQK0;Q9UMR2;Q9HBZ9;Q7Z4W5;Q59FQ9;Q68DY7;B4DL69;Q69YM2;A0A024QZ90;I3L352	ATP-dependent RNA helicase DDX19B	DDX19B;DDX19A;DKFZp686C21137;hCG_1998531;DKFZp762C1313	9	10	1
CON__P12763			10	11	1
E9PFZ2;B7Z5Q2;Q1L857;A8K5A4;A5PL27;P00450;B3KTA8;H7C5R1	Ceruloplasmin	CP	11	12	1
Q96L91;A0A024RBS8;H9KV84;A0A0A0MR72;A0A0A0MR80;A7E2D7;Q6ZTU2	E1A-binding protein p400;EP400 N-terminal-like protein	EP400;hCG_1744452;EP400NL	14	15	1
Q5T196;B3KQW9;Q8NFF5	FAD synthase;Molybdenum cofactor biosynthesis protein-like region;FAD synthase region	FLAD1	15	16	1
A0FGW6		SPANXC	15	16	1
A0A0C4DGT3;B4DGC5;A0A087WWK8;Q6DN90	IQ motif and SEC7 domain-containing protein 1	IQSEC1	17	18	1
B4DIZ6;A0A140VJQ3;Q96DE0	U8 snoRNA-decapping enzyme	NUDT16	18	19	1
B4DP22;Q9HB40	Retinoid-inducible serine carboxypeptidase	SCPEP1	20	21	1
B4DY91;B0FLL2;O60825;B4DI16;Q68DE0;I1Z9G3;I1Z9G4;Q4VBA8;P16118	6-phosphofructo-2-kinase/fructose-2,6-bisphosphatase 2;6-phosphofructo-2-kinase;Fructose-2,6-bisphosphatase;6-phosphofructo-2-kinase/fructose-2,6-bisphosphatase 1;6-phosphofructo-2-kinase;Fructose-2,6-bisphosphatase	PFKFB2;DKFZp781D2217;PFKFB1	21	22	1
H0Y4W0;Q9UBI1;R4GN54;B3KY73;R4GMW6;H0Y6Z9;R4GMX3	COMM domain-containing protein 3	COMMD3;COMMD3-BMI1	21	22	1
A0A024R8M0;Q14344;B4DWV9	Guanine nucleotide-binding protein subunit alpha-13	GNA13	22	23	1
A0A024R944;P01008;A0A0K0Q2Z1	Antithrombin-III	SERPINC1	23	24	1
P0CG35;P0CG34;H3BU88;A0A087X1C1	Thymosin beta-15B;Thymosin beta-15A	TMSB15B;TMSB15A	23	24	1
Q9UP83;B3KMW0	Conserved oligomeric Golgi complex subunit 5	COG5	23	24	1
S4R3V7;S4R434;Q96MV1	Transmembrane protein 56	TMEM56-RWDD3;TMEM56	25	26	1
F6SYF8;Q9UBP4;B3KS70;B4DI69;B4DID6	Dickkopf-related protein 3	DKK3	26	27	1
Q8N5G0	Small integral membrane protein 20	SMIM20	26	27	1
Q69YN4;H0YBN5	Protein virilizer homolog	KIAA1429	27	28	1
Q9UPM8	AP-4 complex subunit epsilon-1	AP4E1	27	28	1
V9N3I1;M1LDI7;A0A180H729;E0WMV6;D7GK31;Q29754;Q29651;Q29683;Q29712;Q29755;Q29648;Q9MXZ3;Q95381;Q3LTK0;Q3LTJ6;Q3LTJ3;Q31644;Q31642;Q29649;O19723;O19632;Q9MY17;Q9MY00;Q29804;O19696;Q8MGY3;Q8MGY2;Q7YPW3;Q29687;Q29686;Q9TQ23;Q9GIL1;Q8WLR9;Q861B8;Q860S1;Q860B8;Q7YP63;Q29732;O19594;O19592;H8WV82;H8WV80;Q45W57;Q30049;I2B1C4;C1JJS3;Q30107;Q30106;Q29964;Q29957;O77970;O02951;H8WV85;Q9GIL4;Q29893;Q29887;O19…	HLA class II histocompatibility antigen, DRB1-12 beta chain;HLA class II histocompatibility antigen, DRB1-13 beta chain;HLA class II histocompatibility antigen, DRB1-3 chain	HLA-DRB1;HLA-DPB1;DQB1-02;HLA-DQB1;HLA-DRB1*1327;HLA-DRB1*;MHC class II HLA-DRB1 Exon-2;HLA DRB1*1202;DRB1*13PL;DPB1;MHC class II HLA-DRB1*1315;HLA-DR3;MHC-DPB1*6001;HLA-DB1;HLA-C;HLA-DRB3;HLA-DRB1*1302Var;HLA DRB1;DRB1;DRB1*1116;MHC class II HLA DRB1-0305;HLA-DR;HLA-DR15;HLA-DRB;HLA-A;HLA-D;HLA-DR-beta;HLA-DRB1-1113;HLA-DRB4;HLA-DP;HLA-DPB;HLA-DQ-beta;HLA-DR-beta1;HLA-DRw12	27	28	1
F5H8G1;F5H1Z6;F5H8H3;B3KTJ1;A0A024R5L8;Q9Y365;F5GWK5;F5H5A8;H0YGN8;F5H3G8;F5H0V7;H0YH17;H0YGA9;A0A024R5G8;H0YFF3;F5GY11	PCTP-like protein	STARD10	27	28	1
Q8NBH6;P23142;CON__ENSEMBL:ENSBTAP00000016046	Fibulin-1	FBLN1	28	29	1
A0A0M3HER2			29	30	1
Q04828;B4DK69;Q2XPP3;P52895;B4E0M1;H0Y804;Q59GU2;S4R3Z2;A0A0A0MSS8;P42330	Aldo-keto reductase family 1 member C1;Aldo-keto reductase family 1 member C2;Aldo-keto reductase family 1 member C3	AKR1C1;AKR1C2;AKR1C3	30	31	1
Q9NYJ8;U3KQ62;A0A1B0GV57;B4DIR9	TGF-beta-activated kinase 1 and MAP3K7-binding protein 2	TAB2	30	31	1
Q9BTU6;E9PAM4;B4DEP8	Phosphatidylinositol 4-kinase type 2-alpha	PI4K2A	30	31	1
CON__P02672			31	32	1
Q96C95;H0Y7R8		MLLT4	31	32	1
P05204	Non-histone chromosomal protein HMG-17	HMGN2	33	34	1
Q9BVM2	Protein DPCD	DPCD	33	34	1
A0A024QZT4;P50453;Q6N0A8	Serpin B9	SERPINB9;DKFZp686O07189	33	34	1
B2RCP1;E9PCN2;B7Z6G8;Q02153;B7Z9H9;B7Z685;D6RC99	Guanylate cyclase soluble subunit beta-1	GUCY1B3	34	35	1
A0A024R6B5;P54652;B3KUS2	Heat shock-related 70 kDa protein 2	HSPA2	35	36	1
E7EQ12;B7Z7L4		CAST	36	37	1
H9STU8;D2Y6Y7;D3WYZ0;A0A098CMI8;A0A098CL94;A0A098CL77;A0A098CJX4;Q14XY3;A0A0D4WP22;A6ZHM2;K7WIJ6;A0A059QQB7;A0A075X6H8;A0A075X6V9;A6ZGJ0;G9LC49;A0A0Y0GJV2;X5CJR1;X5CIF1;X5CFG7;X5CDZ8;X5BZD6;X5BWE9;X5BW47;X5BSQ0;X5BSN2;X2CNL3;X2C587;W8DFC5;W8DBL0;W8D9J2;W8D8V4;W8D860;W8D5L5;W8D5F7;W8D2P9;W5VMK3;W0C8M5;W0C6Y6;W0C6A8;V9NAZ0;V9N8I7;V9N5U4;V9N4L5;V9M6K4;V9K6C5;V9K4I6;V9K052;V9JTU3;V9JF96;V9JB23;V5JTX2…	ATP synthase subunit a	ATP6;atp6;MTATP6;ATPase 6;MT-ATP6	44	45	1
H3BU82;F8VZ44;Q53HS1;Q9NRG9;B4DDU7	Aladin	AAAS	46	47	1
Q9HCD5	Nuclear receptor coactivator 5	NCOA5	46	47	1
X6RLT1;H0UI80;Q8IXH7;B4E2K1	Negative elongation factor C/D	NELFCD;TH1L	47	48	1
E7EVH9;Q08623	Pseudouridine-5-phosphatase	HDHD1	48	49	1
X6RAL5;O00422;H7BZW6	Histone deacetylase complex subunit SAP18	SAP18	52	53	1
H0YDV3;Q8IWF9	Coiled-coil domain-containing protein 83	CCDC83	52	53	1
O75165	DnaJ homolog subfamily C member 13	DNAJC13	54	55	1
B4DWA0;A0A024RCT9;P17096	High mobility group protein HMG-I/HMG-Y	HMGA1	58	59	1
Q9H330;H7C0G1	Transmembrane protein 245	TMEM245	58	59	1
A5YM51		MYH7	59	60	1
Q14257;H0YL43	Reticulocalbin-2	RCN2	59	60	1
A0A024R850;Q96E11;X6RDS5;A0A024R855	Ribosome-recycling factor, mitochondrial	MRRF	60	61	1
P26447	Protein S100-A4	S100A4	61	62	1
B2RBH6;Q8ND76;B7Z8E4	Cyclin-Y	CCNY	61	62	1
A0A024R884;Q4LE33		TNC;TNC variant protein	64	65	1
Q5JPB8;G3V1D3;G3V180;Q9NY33;Q53HL4;Q53GT4;B4E357	Dipeptidyl peptidase 3	DKFZp686O1117;DPP3	65	66	1
D3DPG0;A0A0A0MTS7		TTN	66	67	1
A0A140VJC9;O95372;Q5QPQ1;Q5QPQ0;Q5QPQ3;Q5QPQ2	Acyl-protein thioesterase 2	LYPLA2	66	67	1
A0A024R179;Q09161	Nuclear cap-binding protein subunit 1	NCBP1	66	67	1
A0A0S2Z383;P52952;A1ECB7;A1ECB6;A1ECB2;A1ECB1;A1ECD1;A1ECB8;A0A165EY39	Homeobox protein Nkx-2.5	NKX2-5	66	67	1
A0A024RAM2;P35754;D3DQK5	Glutaredoxin-1	GLRX;hCG_1979388	68	69	1
A0A140TA86;Q5XKP0;K7EIR2;A0A140TA84	Protein QIL1	QIL1;C19orf70	73	74	1
P15531	Nucleoside diphosphate kinase A	NME1	73	74	1
Q5VWZ2	Lysophospholipase-like protein 1	LYPLAL1	75	76	1
A0A024R5H0;O75531;B2R4V4	Barrier-to-autointegration factor;Barrier-to-autointegration factor, N-terminally processed	BANF1	76	77	1
A0A0A0MQW0;A0A0A0MR39;A0A087WUT0;Q9P2K5;A0A024R5Q6	Myelin expression factor 2	MYEF2	77	78	1
A4D1K0;Q16864	V-type proton ATPase subunit F	ATP6V1F	77	78	1
B4DYG5;Q4LE69;P42356;D3DX33	Phosphatidylinositol 4-kinase alpha	PIK4CA variant protein;PI4KA;hCG_1999854	78	79	1
K7EM02;K7EIJ8;Q8IYT4	Katanin p60 ATPase-containing subunit A-like 2	KATNAL2	78	79	1
E9PF10;B4DLT2;A0A024R071;O75694	Nuclear pore complex protein Nup155	NUP155	79	80	1
Q4QQP8;Q1WWL2;A4QPA1;A0A024R0J4		PTGFRN	79	80	1
Q0KKI6;Q8TCD0;Q5EFE6;Q7Z3Y4;Q6GMX0;P01834;A0A075B6H6	Ig kappa chain C region	IGKC	80	81	1
P01023	Alpha-2-macroglobulin	A2M	80	81	1
A0A024RD99;B7Z2D8;B7Z5F9;B3KP14;H0Y8R1;F5H5I6;B7Z3R7;H0YAK1;B3KW50;Q12849	G-rich sequence factor 1	GRSF1	81	82	1
Q9H3K6;A0A087WZT3	BolA-like protein 2	BOLA2	82	83	1
B4DKM6;A0A0J9YXF2;J3QT77;A0A0J9YYG4;B4DW02;Q15165	Serum paraoxonase/arylesterase 2	PON2	82	83	1
P0DN76;B5BU08;Q01081	Splicing factor U2AF 35 kDa subunit	U2AF1	83	84	1
Q8N7A6			83	84	1
Q69YG1;P58546;C9JL85	Myotrophin	DKFZp761E1322;MTPN	83	84	1
Q53SW3;Q9BPU6	Dihydropyrimidinase-related protein 5	DPYSL5	84	85	1
O15400;B4DH37	Syntaxin-7	STX7	84	85	1
V9HW56;P67936;B4DVY2	Tropomyosin alpha-4 chain	HEL-S-108;TPM4	84	85	1
F8VR84;Q8WYI2;Q86UA3;Q9HB07;F8VQQ3;Q96CT6	UPF0160 protein MYG1, mitochondrial	C12orf10;MST024	85	86	1
Q02790;B2R9U2	Peptidyl-prolyl cis-trans isomerase FKBP4;Peptidyl-prolyl cis-trans isomerase FKBP4, N-terminally processed	FKBP4	86	87	1
Q86SX6	Glutaredoxin-related protein 5, mitochondrial	GLRX5	86	87	1
A0A0J9YXC7			86	87	1
A0A087X1K9;E5RGR0;Q6IAQ1;B4DJV9;O75608;B4DP64	Acyl-protein thioesterase 1	LYPLA1	86	87	1
P82663;E7EPW2	28S ribosomal protein S25, mitochondrial	MRPS25	86	87	1
D4Q8H0;A8K710;B4DQ47;Q9NYL2	Mitogen-activated protein kinase kinase kinase MLT	pk;ZAK	87	88	1
X5D8Y5;Q13363;Q4KMQ8;X5D7T7;D6RAX2;E7ESU7;E7EPF8	C-terminal-binding protein 1	CTBP1	87	88	1
O60888;C9IZG4	Protein CutA	CUTA	87	88	1
Q8NBY1;Q499L9;B4E0Y9;Q9P289;Q9NWX4;C9JDH9;C9J6L2;C9JCC0;C9J232;H7C279;Q5CZ67;B4E185;B3KRS6;A0A0S2Z4Y2;B4DVS7;Q96BA2;A0A024R4B2;O00506	Serine/threonine-protein kinase 26;Serine/threonine-protein kinase 25	STK26;MST4;STK25;DKFZp686J1430	87	88	1
Q5JR08;A0A024R0I3;P08134;E9PQH6;Q5JR07;C9JNR4;C9JX21;Q5JR05	Rho-related GTP-binding protein RhoC	RHOC;hCG_2043376;RHOA	87	88	1
Q5VTT5	Myomesin-3	MYOM3	88	89	1
P55036;A6PVX3	26S proteasome non-ATPase regulatory subunit 4	PSMD4	88	89	1
A0A140VJX3;P25325;Q2VEU1;B1AH49;Q59HD5	3-mercaptopyruvate sulfurtransferase;Sulfurtransferase	MPST	88	89	1
B7Z5S9;O94973;A0A0G2JS82;A0A0G2JQM1;B7Z1Q4	AP-2 complex subunit alpha-2	AP2A2	88	89	1
H0YNH8;B7ZKM6;Q9BZF9;F5H2B9;B7ZKM7	Uveal autoantigen with coiled-coil domains and ankyrin repeats	UACA	88	89	1
X5D2R5;Q8TB37;X5D995;X5DR74;F8W061;B4DWB0;H0YHR7	Iron-sulfur protein NUBPL	NUBPL	88	89	1
A0A024RCN6;P26640;A0A140T936	Valine--tRNA ligase	VARS	88	89	1
B4DIZ2;P61086;D6RDM7	Ubiquitin-conjugating enzyme E2 K	UBE2K	88	89	1
C9J3L8;C9J5W0;B2R6N9;E9PAL7;C9IZQ1;P43307	Translocon-associated protein subunit alpha	SSR1	88	89	1
V9HWA9;P01024;B4E216	Complement C3;Complement C3 beta chain;C3-beta-c;Complement C3 alpha chain;C3a anaphylatoxin;Acylation stimulating protein;Complement C3b alpha chain;Complement C3c alpha chain fragment 1;Complement C3dg fragment;Complement C3g fragment;Complement C3d fragment;Complement C3f fragment;Complement C3c alpha chain fragment 2	HEL-S-62p;C3	89	90	1
B2R6E5;A8K3B4;Q59ED7;P16435;Q63HL4;B4DKM8;E7EMD0;B4DDH3	NADPH--cytochrome P450 reductase	POR;DKFZp686G04235	89	90	1
F8W7C6;H7C123;H7C2C5		RPL10	89	90	1
Q53FU3;A0A024RB72;F8VVA7;P61923;F8VXB1;F8W156;F8W651;F8VYZ4;F8VUC5;F8VXR1	Coatomer subunit zeta-1	COPZ1	89	90	1
B4DWN1;A8K7T4;Q12907;D6RBV2;D6RIU4;D6RDX1	Vesicular integral-membrane protein VIP36	LMAN2	89	90	1
Q9Y235;B4DUL0	Probable C->U-editing enzyme APOBEC-2	APOBEC2	89	90	1
Q7L2H7;H0YCQ8	Eukaryotic translation initiation factor 3 subunit M	EIF3M	89	90	1
F6WQW2;C9JDM3		RANBP1	89	90	1
P50570	Dynamin-2	DNM2	90	91	1
V9HW71;P30040;F8VY02	Endoplasmic reticulum resident protein 29	HEL-S-107;ERP29	90	91	1
Q6IB54;P18859;Q6NZ59;A8MUH2	ATP synthase-coupling factor 6, mitochondrial	ATP5J	90	91	1
Q6YHK3	CD109 antigen	CD109	90	91	1
B4E022;V9HWD9;Q53EM5;P29401;A0A0B4J1R6;B3KSI4;A0A0K0K1H9;B3KPZ8;B4DVU1	Transketolase	HEL107;TKT	90	91	1
Q2NLD4;Q2NLC9;Q56A79;Q00577	Transcriptional activator protein Pur-alpha	PURA	90	91	1
P13674;Q5VSQ6	Prolyl 4-hydroxylase subunit alpha-1	P4HA1	90	91	1
K7EIK7;O95834;A0A0C4DGQ7;C9JRL6;B7Z872;B7Z918	Echinoderm microtubule-associated protein-like 2	EML2	90	91	1
Q8NBX0	Saccharopine dehydrogenase-like oxidoreductase	SCCPDH	90	91	1
Q14126	Desmoglein-2	DSG2	91	92	1
CON__P35527;P35527;K7EQQ3	Keratin, type I cytoskeletal 9	KRT9	91	92	1
CON__P02662			91	92	1
P25391	Laminin subunit alpha-1	LAMA1	91	92	1
D3DSV0;B4E3T4;Q93062;Q569H2;H0YBU9	RNA-binding protein with multiple splicing	hCG_2043421;RBPMS	91	92	1
A8K2M0;P43686	26S protease regulatory subunit 6B	PSMC4	91	92	1
A0A090N8G0		GARS	91	92	1
P49720;A0A087WXQ8;A0A087WY10;A0A087WUL2	Proteasome subunit beta type-3	PSMB3	91	92	1
P67809;Q6PKI6;Q7KZ24;H0Y449	Nuclease-sensitive element-binding protein 1	YBX1	91	92	1
A8K6X3;A0A0C4DG89;Q7L014;D3DQA6	Probable ATP-dependent RNA helicase DDX46	DDX46	91	92	1
Q504R6;P51153;D3DV69;A0A024RB27	Ras-related protein Rab-13	RAB13;hCG_1996054;hCG_24991	91	92	1
M0R0Y2;A0A024R0R9;P54920;M0R2M1	Alpha-soluble NSF attachment protein	NAPA	91	92	1
B2RD27;P51665;B4DXI8;H3BNT7;H3BTM8	26S proteasome non-ATPase regulatory subunit 7	PSMD7	91	92	1
B7ZLW0;Q93052;A0A087WZF1;B7Z8W0;C9JUT4	Lipoma-preferred partner	LPP	91	92	1
Q10713	Mitochondrial-processing peptidase subunit alpha	PMPCA	91	92	1
E7EVJ5;B7Z4I3;B7Z8N7;Q96F07;H7C229;E7EW33;B7Z217;B7Z3H2;Q9NSN1	Cytoplasmic FMR1-interacting protein 2	CYFIP2;DKFZp761H087	91	92	1
Q1KMD3;H3BQZ7	Heterogeneous nuclear ribonucleoprotein U-like protein 2	HNRNPUL2;HNRNPUL2-BSCL2	91	92	1
A0A024QYW3;Q04941	Proteolipid protein 2	PLP2	0	0	0
A0A087WXN9;Q765P7	MTSS1-like protein	MTSS1L	0	0	0
A0A0S2Z3K4;J3QTA2;Q99933	BAG family molecular chaperone regulator 1	BAG1	0	0	0
A0A0U1RQL8			0	0	0
A6NKD9	Coiled-coil domain-containing protein 85C	CCDC85C	0	0	0
B7Z1Z9	Fructose-bisphosphate aldolase		0	0	0
B7Z2D5			0	0	0
E9PJN9		RPS3	0	0	0
F6V107;A0A024R1R7;Q53HE0;B3KM22;A0A024R1J5;Q9NRD5	PRKCA-binding protein	PICK1	0	0	0
K7ES63		TUBB6	0	0	0
P41250	Glycine--tRNA ligase	GARS	0	0	0
P62487	DNA-directed RNA polymerase II subunit RPB7	POLR2G	0	0	0
Q14532;CON__Q14532	Keratin, type I cuticular Ha2	KRT32	0	0	0
Q4R1L5		COII	0	0	0
Q5T0I1		GSN	0	0	0
Q8TAS0;P36542	ATP synthase subunit gamma;ATP synthase subunit gamma, mitochondrial	ATP5C1	0	0	0
Q96B49	Mitochondrial import receptor subunit TOM6 homolog	TOMM6	0	0	0
Q96NX8		STX16	0	0	0
A0A024QZ34;K7ES70;P55083	Microfibril-associated glycoprotein 4	MFAP4	1	1	0
A0A024R4D7;Q9NSA3	Beta-catenin-interacting protein 1	CTNNBIP1	1	1	0
A0A024R669;A0A024R688;P51948;H0YJ92;H0YJF2	CDK-activating kinase assembly factor MAT1	MNAT1	1	1	0
A0A087WUF6;P09038;D9ZGF5	Fibroblast growth factor;Fibroblast growth factor 2	FGF2	1	1	0
A0A0M4FLI9;A0A0M4F6E1;Q96T17;B3KXC0;A0A0K1JS24;A0A0K1JRJ6;A0A0M3R6J9	MAP7 domain-containing protein 2	MAP7D2	1	1	0
B3KXP1;H7C163;A0A0A0MRS7;Q68DC2	Ankyrin repeat and SAM domain-containing protein 6	ANKS6	1	1	0
B4DJ98			1	1	0
B4DZB4			1	1	0
B4E1Z8			1	1	0
G3V3J9;G3V2N0;P59768	Guanine nucleotide-binding protein subunit gamma;Guanine nucleotide-binding protein G(I)/G(S)/G(O) subunit gamma-2	GNG2	1	1	0
J3KPC8;H7C3X8;A1A5A9;H0Y494;M5FMX3;H0Y4E8;Q9Y2K2	Serine/threonine-protein kinase SIK3	SIK3;KIAA0999	1	1	0
O00148;B4DX78	ATP-dependent RNA helicase DDX39A	DDX39A	1	1	0
O60380		WUGSC:H_RG363E19.2	1	1	0
P58107	Epiplakin	EPPK1	1	1	0
Q5T9B9;Q96CG0;A8K2X4;A0A024R878;P17813;B4DYI8;F5GX88;B7Z6Y5	Endoglin	ENG	1	1	0
Q6QN92;Q6IAT2;Q53XL7;P23434	Glycine cleavage system H protein, mitochondrial	GCSH	1	1	0
Q8TAD2	Interleukin-17D	IL17D	1	1	0
Q8TCG4		TPM1	1	1	0
Q9UL78;A2NB46;G3GAU4			1	1	0
B4E3L8;B4DG83;B4DU51;Q07820;C8YZ26;A0A087WT64;B4DLY8	Induced myeloid leukemia cell differentiation protein Mcl-1	MCL1	2	2	0
A0A024R8P4;Q9BSJ5;I3L072;B7Z7E5	Uncharacterized protein C17orf80	C17orf80	2	2	0
M0R2U7		HOMER3	2	2	0
Q6FG85;Q53F41;O60739	Eukaryotic translation initiation factor 1b	GC20;EIF1B	2	2	0
A2BEK1;O60927	Protein phosphatase 1 regulatory subunit 11	PPP1R11	2	2	0
A0A126LB21			2	2	0
Q6N039;E9PC87;O94876	Transmembrane and coiled-coil domains protein 1	DKFZp686H13261;TMCC1	2	2	0
Q9Y2G0;H7BXG9;E7ESK9;B3KT90	Protein EFR3 homolog B	EFR3B	2	2	0
E7ENM0;E7EN65;A7L3I8;E7ETP7;Q6ZUN2;B3KSR2;G3V0G6;B4E3S4;F8WAH6;P15502	Elastin	ELN	2	2	0
B4DSE0;B1AKC9;Q4LE53;P29323;B4DQP7	Receptor protein-tyrosine kinase;Ephrin type-B receptor 2	EPHB2;EPHB2 variant protein	2	2	0
D3DVB3;A0A087WT04;U3KQ54;Q6P1K2	Polyamine-modulated factor 1	hCG_1999356;PMF1-BGLAP;PMF1	2	2	0
B4DEC3			2	2	0
A0A127AXK3;A0A0B5HSU7;A0A0B5HP44;A0A0B5HP26;A0A0B5HLC0;A0A0B5HLA6;A0A0B5HFD9;A0A0B5HFC0;A0A0B5HBG5;A0A0B5HBE9;D6R955;D6RBG8;D6R9U1;H0YJC8;U3KQ81;D6RFI4;X5D9A5;O75364;P78337;Q99697	Pituitary homeobox 3;Pituitary homeobox 1;Pituitary homeobox 2	PITX3;PITX1;PITX2	2	2	0
I3L3E8;I3L2Q0;U4PP31;Q9P086	Mediator of RNA polymerase II transcription subunit 11	MED11	2	2	0
A0A0C4DH29;A2N7P4		IGHV1-3;IGHM	2	2	0
Q5Y190;Q9NYQ7	Cadherin EGF LAG seven-pass G-type receptor 3	RESDA1;CELSR3	2	2	0
A0A024RB10;A0A024RB77;G3V5T9;P24941;K7EJ83;E7ESI2;B4DDL9;A0A024R8R3;Q00526	Cyclin-dependent kinase 2;Cyclin-dependent kinase 3	CDK2;CDK3	2	2	0
G3V1B8;H0YEB6;O60232	Sjoegren syndrome/scleroderma autoantigen 1	SSSCA1	2	2	0
I3WTX1;Q4V347;Q5STX8;P55008	Allograft inflammatory factor 1	AIF1	2	2	0
Q5XG87;B4E0T3;B7ZLL4;A0A0X1KG68	Non-canonical poly(A) RNA polymerase PAPD7	PAPD7;POLS	3	3	0
Q30118;B4DVL4;A0A0G2JH46;Q59GE3;B0UXD8;A0A0G2JMH6;Q7YPT8;P01903	HLA class II histocompatibility antigen, DR alpha chain	HLA-DRA;HLA-DRA1;HLA-DQA1/DRA	3	3	0
B4DXH2;B4DUZ3;A0A087X1E4;P53365	Arfaptin-2	ARFIP2	3	3	0
A0A0J9YXQ9;Q53QD4;B3KST6;Q8WVT3;A0A0G2JQW1;Q8N9N0	Trafficking protein particle complex subunit 12	CGI-87;TRAPPC12	3	3	0
Q01804	OTU domain-containing protein 4	OTUD4	3	3	0
A0A024QYZ0;P60059	Protein transport protein Sec61 subunit gamma	SEC61G	3	3	0
B3KQU6;Q8IXM6;H0Y6T6	Nurim	NRM	3	3	0
Q8NCR1		VPS53	3	3	0
H7BZ97;P23229	Integrin alpha-6;Integrin alpha-6 heavy chain;Integrin alpha-6 light chain;Processed integrin alpha-6	ITGA6	3	3	0
F8VV32;A0A0B4J259;B2R4C5;P61626	Lysozyme;Lysozyme C	LYZ	3	3	0
E9PPN3;E9PS17;E9PK59;Q96KG9;A0A0A0MQX4	N-terminal kinase-like protein	SCYL1	4	4	0
C9J191;Q53GT1;C9JHG1;C9J2T1;C9J5F8	Kelch-like protein 22	KLHL22	4	4	0
Q6LEN2;Q6LEN0;Q16647	Prostacyclin synthase	PTGIS;PGIS	4	4	0
H0Y5C0;B1ALU3;O95490;B1ALU1	Latrophilin-2	ADGRL2;LPHN2	4	4	0
Q9H920;E9PLR7;F8WDV7;Q9NUW5;E9PKE9;G3V148;A0PJP0	RING finger protein 121	RNF121	4	4	0
CON__Q14525;Q14525	Keratin, type I cuticular Ha3-II	KRT33B	4	4	0
A6NCN2	Putative keratin-87 protein	KRT87P	4	4	0
Q16187		E2k	4	4	0
Q9NUD5	Zinc finger CCHC domain-containing protein 3	ZCCHC3	4	4	0
B4DEH8;G3V4T2		PABPN1	4	4	0
CON__A2A5Y0			4	4	0
B7Z6Y3;Q9Y3L3;Q6ZTJ5;Q3ZTT7	SH3 domain-binding protein 1	SH3BP1	4	4	0
V9GYS0;O60830;V9GYU0	Mitochondrial import inner membrane translocase subunit Tim17-B	TIMM17B	4	4	0
B4DP28;F8W8R3;A0A087WWF6;P49005;H7C1B3;C9IZD2;C9J8Z7;C9JLE1	DNA polymerase delta subunit 2	POLD2	4	4	0
A0A140TA69;A0A140TA62;CON__Q8IUT8;CON__O76011;O76011	Keratin, type I cuticular Ha4	KRT34	5	5	0
P05109	Protein S100-A8;Protein S100-A8, N-terminally processed	S100A8	5	5	0
H3BQE4;D3DWS4		ZNF821;LOC55565	5	5	0
B7Z5G6;B7Z656;B7Z3F1;B7Z5Q8;E7EPK0;E9PDJ9;B7Z2J4;H0Y8P3;D6RD46;G5EA03;Q9UPQ0;B7Z3G0	LIM and calponin homology domains-containing protein 1	LIMCH1	5	5	0
G3V5Z3;A0A024R6M2;Q6IN85;H0YIY8	Serine/threonine-protein phosphatase 4 regulatory subunit 3A	SMEK1;KIAA2010	5	5	0
S4R329;H0YK61;H0YNK0;H0YNK8;A0A0S2Z598;A0A024R9N3;Q5J8M3;H0YLP8	ER membrane protein complex subunit 4	EMC4;TMEM85	5	5	0
Q9NRX5	Serine incorporator 1	SERINC1	5	5	0
Q9UJY4	ADP-ribosylation factor-binding protein GGA2	GGA2	5	5	0
E9PM62;Q8N2N3;Q96IV8;Q5T9L3;E9PQK1	Protein wntless homolog	WLS;GPR177	5	5	0
A0A075X6S7;Q5Q2N8;Q5Q1W2;A0A075X8H6;X2C5C9;A0A059S1Y5;A0A059RPI8;A0A059QPI2;A0A059RP47;A0A1B1PEL1;A0A059QMF7;A0A059QD37;A0A088FSE5;A0A023Q488;C8YAE4;A0A059R5S6;X5D927;X5C9H5;X5BVM8;X5BMX5;X5BDH6;W8DJ92;W8DEK8;W8D226;W0C7W3;V9PAX5;V9N872;V9N3I6;V9JVR4;V9JU54;V9JI12;V9JCG6;V9JAP4;V9J978;V9J4D6;V9J248;V5L903;V5JIE7;U5ZA32;U5YWV7;U3LSF4;U3L6G3;U3L439;U3KW58;T2HM13;T2HKF7;T1Q7E3;T1Q4Y6;S4SSZ5;R9Y9M1;R…	Cytochrome c oxidase subunit 1	COX1;coxI;COI;CO1;MT-CO1	5	5	0
Q9H511	Kelch-like protein 31	KLHL31	5	5	0
C4AM86;A0A024R1T2;Q92764;CON__Q92764	Keratin, type I cuticular Ha5	KRT35;KRTHA5	6	6	0
H3BUV8;Q08397	Lysyl oxidase homolog 1	LOXL1	6	6	0
R4GNB2;R4GN35		DENND4C	6	6	0
Q6IBN4		PECI	6	6	0
A0A0B4J2D9		IGKV1D-13	6	6	0
B5MBZ0;A6P4V4;Q9HC35;B3XZM0;A9YLN7	Tyrosine-protein kinase receptor;Echinoderm microtubule-associated protein-like 4	EML4;EML4/ALK fusion	6	6	0
B3KSN1;A0A0S2Z652;P83436	Conserved oligomeric Golgi complex subunit 7	COG7	6	6	0
P15882;B8ZZ96;Q59EM3;Q6IBE0;C9J3G1;C9J3V9;C9JR98;F8W6K2	N-chimaerin	CHN1	6	6	0
CON__Q61726			6	6	0
Q53GA7;F5H5D3;Q9BQE3;B7Z1K5;Q8N532	Tubulin alpha-1C chain	TUBA1C	6	6	0
J3KPS0;Q9NXW2;Q659G2;V9GY70;V9GYN7	DnaJ homolog subfamily B member 12	DNAJB12;DKFZp586B2023	7	7	0
Q13103;C9J6K0	Secreted phosphoprotein 24	SPP2	7	7	0
O14933	Ubiquitin/ISG15-conjugating enzyme E2 L6	UBE2L6	7	7	0
B3KNQ9;B3KWP0;B4DTG4;E9PMQ6;Q00613	Heat shock factor protein 1	HSF1	7	7	0
Q53T59;H7C0Y9;F8WDN8;H7BZZ1;F6TR53;Q9H7U7	HCLS1-binding protein 3	HS1BP3	7	7	0
A0A0A0PZ76;A0A0A0PMV0;A0A0A0PWW8;A0A0A0PMJ8;A0A0A0PV27;A0A0A0PMS4;A0A0A0PVF3;X2C0J7;X2C0J3;X2C0I9;X2C0V5;X2C0I6;A0A0A0PXN1;A0A0A0PXR7;A0A0A0PYV6;A0A0A0PSE8;A0A0A0PWY2;A0A0A0PPX2;A0A0A0PU97;A0A0A0PRG6;A0A0A0PPE7;A0A0A0PPV1;X2CLX6;V9N931;V9M958;V9K2Q7;V9JR71;V9JDL3;V9JBQ6;V9J6I9;V9J4J6;V9J1G8;U5Z977;U5Z8L9;U3L5W2;T1Q6P2;T1Q6I5;T1Q524;R9Y8B2;Q9B302;Q9B2Y0;Q9B2U4;Q9B1K4;Q9B0M9;Q8WCX7;Q8HG31;Q8HG29;Q8…	NADH-ubiquinone oxidoreductase chain 6	ND6;NADH6;MT-ND6	7	7	0
CON__REFSEQ:XP_986630			7	7	0
B4DDB3;I3L213;B3KVX5		PHKB	7	7	0
B4DI61;Q6FI18;Q53FA4;O00622;Q9UID7	Protein CYR61	CYR61	7	7	0
B7ZKR8;B7ZKS3;Q86UV5	Ubiquitin carboxyl-terminal hydrolase 48	USP48	8	8	0
F8VWT9;J3KPF0;Q9Y4D8	Probable E3 ubiquitin-protein ligase HECTD4	HECTD4	8	8	0
Q9H0L4	Cleavage stimulation factor subunit 2 tau variant	CSTF2T	8	8	0
Q9H4P6;E7EQZ7;Q9UK43;Q95HA6;B2R5Y4;Q13123;Q9Y3Z5;D6REL4	Protein Red	IK;CSA2;DKFZp564B112	8	8	0
CON__Q6NT21;P78385;A0JNT2;CON__P78385	Keratin, type II cuticular Hb3	KRT83	9	9	0
Q14WI3;X2C0V4;A0A0N6W1Y9;A0A075XDP0;A0A075X7J5;A0A098CLD5;A0A098CK12;A0A0N6YNN2;Q8W9B1;A0A075X6R1;A0A075XDG3;A6ZHG8;Q4R1L7;V9N787;S5RP67;Q8WCX9;Q4F4Q9;L7P4B9;L7P4B8;J7HWH1;J7HR73;J7HLK4;J7HKC6;H9S4I5;H9P359;H9MYH0;H9MWB6;H9MSR8;H9MS34;H9MRT0;H9MRG3;H9MQG2;H9MQ71;H9MQ45;H9MPV4;H9MJW2;H9MJU9;G9LHL8;G9LB43;F6N878;A0A097PZK9;A0A097PZK0;A0A097PZ19;A0A097PX89;A0A097PWD6;A0A097PW36;A0A097PVV2;A0A097PVP0…	NADH-ubiquinone oxidoreductase chain 1	ND1;NDI;NADH1;MT-ND1;ndh1	9	9	0
A1L188	Uncharacterized protein C17orf89	C17orf89	9	9	0
A0A0B4J287;H3BM91;Q9H0A8;H3BPG2;H3BQF2	COMM domain-containing protein 4	COMMD4	9	9	0
Q9UH90	F-box only protein 40	FBXO40	9	9	0
A8KAQ3;Q99523;A0A0J9YVX1;A0A0J9YX61	Sortilin	SORT1	9	9	0
CON__O76013;O76013	Keratin, type I cuticular Ha6	KRT36	9	9	0
Q712K3	Ubiquitin-conjugating enzyme E2 R2	UBE2R2	9	9	0
A2VDI9;Q8IWU2	Serine/threonine-protein kinase LMTK2	LMTK2	9	9	0
A8K787			10	10	0
A0A1B0GV18			10	10	0
C9JGQ0;H7C372;B4DUZ2;B4E0L3;B4DEL1;B3KY54;P53814	Smoothelin	SMTN	10	10	0
A8K3R3;A0A024RDL6;E9PFK9;Q9UJ41;Q3HKR1;A0A0A0MSJ3;B3KMF1	Rab5 GDP/GTP exchange factor	RABGEF1	11	11	0
Q9NXR7;F8W733;C9J2G0;Q6ZWH1	BRCA1-A complex subunit BRE	BRE	11	11	0
E9PHV4;A0A024RAJ4;O15514;Q587J0;Q53T47;E9PB93	DNA-directed RNA polymerase II subunit RPB4	POLR2D	11	11	0
A8K6M0;A8K6I6;Q9NZ52;B7Z456;J3KSS7	ADP-ribosylation factor-binding protein GGA3	GGA3	11	11	0
Q3MIX3	Uncharacterized aarF domain-containing protein kinase 5	ADCK5	11	11	0
X5D2H9;P36382	Gap junction protein;Gap junction alpha-5 protein	GJA5	11	11	0
R4SCQ0;R4SCP5;R4SCF3;R4SCC4;R4S1C5;R4RZ18;R4RYZ7;R4RYY7;Q9GZT9	Egl nine homolog 1	EGLN1	12	12	0
Q8IWV8	E3 ubiquitin-protein ligase UBR2	UBR2	12	12	0
F8WCN7;C9JCD9;P41223	Protein BUD31 homolog	BUD31	12	12	0
D3DVR8;P42858;A8K3C9	Huntingtin	HD;HTT	13	13	0
B4E0C1;Q8TED9	Actin filament-associated protein 1-like 1	AFAP1L1	13	13	0
H0YBN7;B4DHX0;E7EVQ6;Q9UNR6;Q5HYI4;Q14534	Squalene monooxygenase	SQLE;ERG1;DKFZp686B0215	14	14	0
V9HWJ7;Q53FI1;A0A024RDT4;P13796;Q59GX5	Plastin-2	HEL-S-37;LCP1	15	15	0
B4DP48;Q8IUX1;H0YEG5;E9PKZ9;E9PJQ6;E9PKZ7;H0YD74;Q9H2Q3;A0A024R5L4	Complex I assembly factor TMEM126B, mitochondrial	TMEM126B	15	15	0
K7ENQ8;Q15438;K7ERV8;B4DLA7;B7Z9W0	Cytohesin-1	CYTH1	16	16	0
H3BNU1;Q9ULP9;A0A0D9SFR5;H3BQ06	TBC1 domain family member 24	TBC1D24	18	18	0
Q86VR1;Q7Z682;Q4KMX3;Q9HDC5	Junctophilin-1	JPH1;DKFZp779I2251	18	18	0
Q96LA8	Protein arginine N-methyltransferase 6	PRMT6	18	18	0
K7EJU9;B2WTI3;B2WTI4;A0A0S2PZM4;Q6NYC1	Bifunctional arginine demethylase and lysyl-hydroxylase JMJD6	JMJD6	19	19	0
Q13541	Eukaryotic translation initiation factor 4E-binding protein 1	EIF4EBP1	19	19	0
P17900;Q14427;H0YBY3;E5RJD0	Ganglioside GM2 activator;Ganglioside GM2 activator isoform short	GM2A	20	20	0
B3KRT9;H7BXF5;Q9H0E3	Histone deacetylase complex subunit SAP130	SAP130	21	21	0
A0A024RBB9;Q9Y2U8	Inner nuclear membrane protein Man1	LEMD3	21	21	0
Q7Z4W0;A0A087WXU8;Q7Z4X3;F5GYL3;B4E300;B4DKV2;G3V529;Q9GZR7;B4DM03;B4DGI6	ATP-dependent RNA helicase DDX24	DDX24	21	21	0
Q96M27	Protein PRRC1	PRRC1	21	21	0
A0A087WVU6;G3V4V5;A0A087X2H1;Q9ULT8	E3 ubiquitin-protein ligase HECTD1	HECTD1	21	21	0
CON__Q8VED5			22	22	0
Q5T4F7	Secreted frizzled-related protein 5	SFRP5	22	22	0
A8K0D2;A0A024R5F7;Q9UBM7;X5DNI9;E9PJ54;X5D9E1;E9PM00;A0A0S2Z3S3;B4E1K5;X5DRD7	7-dehydrocholesterol reductase	DHCR7	22	22	0
Q8IYB8;B7Z611	ATP-dependent RNA helicase SUPV3L1, mitochondrial	SUPV3L1	23	23	0
B3KMI3;A8K6Q9;A0A024RDV9;Q8N0X7;A0A0S2Z510;B4DXT5;B3KML8	Spartin	SPG20	23	23	0
A8K2W3;O95810	Serum deprivation-response protein	SDPR	25	25	0
Q9UBV8	Peflin	PEF1	25	25	0
B4DNR3;B4DQI4;V9HW87;Q96IU4;F8W9U3	Alpha/beta hydrolase domain-containing protein 14B	ABHD14B;HEL-S-299	26	26	0
A0A1B0GV79;A0A1B0GW21;A0A1B0GTE6;A0A0D9SFK7;A0A1B0GUH6;A0A1B0GUA3;Q96EK5	KIF1-binding protein	KIF1BP;KIAA1279	26	26	0
A0A024R240;P50148;G9FP35;B1AM21	Guanine nucleotide-binding protein G(q) subunit alpha	GNAQ	27	27	0
U3KPU6;A8K3J4;Q9ULX7	Carbonic anhydrase 14	CA14	27	27	0
H0YNE9;Q92930;B4DMS1	Ras-related protein Rab-8B	RAB8B	27	27	0
Q92520;C9JP35;C9JMN4	Protein FAM3C	FAM3C	28	28	0
O95989	Diphosphoinositol polyphosphate phosphohydrolase 1	NUDT3	28	28	0
A8KA19;O43592;A0A024RB67	Exportin-T	XPOT	28	28	0
Q96AB3;K7ENV7;K7EKW4	Isochorismatase domain-containing protein 2, mitochondrial	ISOC2	29	29	0
Q53GP1;P51688;I3NI22;B3KTR7	N-sulphoglucosamine sulphohydrolase	SGSH	30	30	0
Q9NWT6;E9PNR8;B4DI08	Hypoxia-inducible factor 1-alpha inhibitor	HIF1AN	31	31	0
A0A087WWY8;A0A0U1RQC7		CFAP99	36	36	0
A0A0J9YXN7;Q96Q06;A8E631	Perilipin-4	PLIN4;KIAA1881	37	37	0
P00738;A0A0C4DGL8;J3QLC9;J3QR68;H0Y300;Q6NSB4;A0A087WU08;Q6PEJ8;B3KP77;H3BS21	Haptoglobin;Haptoglobin alpha chain;Haptoglobin beta chain	HP	39	39	0
Q8N3F0	Maturin	MTURN	41	41	0
A0A087WV46;C9JXA7;Q0VGL1	Ragulator complex protein LAMTOR4;Ragulator complex protein LAMTOR4, N-terminally processed	LAMTOR4	41	41	0
H0YNP9;Q8N4P3	Guanosine-3,5-bis(diphosphate) 3-pyrophosphohydrolase MESH1	HDDC3	44	44	0
A0A024R1E4;Q9UDX5;B5MC22;H7C417	Mitochondrial fission process protein 1	MTP18;MTFP1	45	45	0
A0A024R035;P02748	Complement component C9;Complement component C9a;Complement component C9b	C9	46	46	0
D6RC52;D6RCB9;Q9NX24;H0YC83;J3QSY4	H/ACA ribonucleoprotein complex subunit 2	NHP2	46	46	0
A0A024R3B4;A0A024R3C8;Q9P013	Spliceosome-associated protein CWC15 homolog	HSPC148;CWC15	46	46	0
B4DKJ9;A0A087WVS8;Q70IA6	MOB kinase activator 2	MOB2	47	47	0
Q53EU2;Q92908	Transcription factor GATA-6	GATA6	47	47	0
A4D110		LOC401309	48	48	0
P62304;A6NHK2	Small nuclear ribonucleoprotein E	SNRPE	49	49	0
P46736;A0A0A0MS96;X6RJS7	Lys-63-specific deubiquitinase BRCC36	BRCC3	50	50	0
B0ZBE8		NPPA	52	52	0
Q6P4A7;Q8N1Q4	Sideroflexin-4	SFXN4	53	53	0
A0A024R8P8;P63173;J3KT73;J3QL01	60S ribosomal protein L38	RPL38	54	54	0
Q9HB66		MKKS	55	55	0
Q8IY95	Transmembrane protein 192	TMEM192	55	55	0
Q69YM5;B3KRJ9;Q8WXA9	Splicing regulatory glutamine/lysine-rich protein 1	DKFZp667P103;SREK1	56	56	0
Q9Y2K3	Myosin-15	MYH15	58	58	0
P84157	Matrix-remodeling-associated protein 7	MXRA7	58	58	0
P55263;Q86U79;A0A140VJE0	Adenosine kinase	ADK	58	58	0
B3KX20;B4E3F8;B4E3S9;B4DIX9;P29536	Leiomodin-1	LMOD1	61	61	0
A0A024R7H5;B4E0Z6;Q10589	Bone marrow stromal antigen 2	BST2	61	61	0
A2A376;B3KWW1;O95786;B3KN51;B4DWT9	Probable ATP-dependent RNA helicase DDX58	DDX58	62	62	0
Q9NRW7;A0AR27;B7Z5E4;A0A087WU65;B7Z360;B7Z5D4;A0A1B0GXI6;Q5T4Q0;B7Z1J7	Vacuolar protein sorting-associated protein 45	VPS45	62	62	0
O95139;A0A087WZX2	NADH dehydrogenase [ubiquinone] 1 beta subcomplex subunit 6	NDUFB6	62	62	0
A0A024R7M8;Q96CT7;M0R2F5	Coiled-coil domain-containing protein 124	LOC115098;CCDC124	63	63	0
Q5T6V5	UPF0553 protein C9orf64	C9orf64	63	63	0
Q6LEU0;Q86Y82;B1AJQ6;B4DSZ1	Syntaxin-12	STX12	67	67	0
P11532	Dystrophin	DMD	67	67	0
Q96SL4	Glutathione peroxidase 7	GPX7	67	67	0
A0A087WU07;Q5TGZ0;R4GMM1;R4GNA1	MICOS complex subunit MIC10	MINOS1;MINOS1-NBL1	68	68	0
A0A024RCB5;B7Z705;B4DN31;Q9BWS9;E9PI70;E9PIP0;E9PRL3;E9PPH0;E9PPA0;E9PKF1	Chitinase domain-containing protein 1	CHID1	68	68	0
Q93100	Phosphorylase b kinase regulatory subunit beta	PHKB	69	69	0
B3KPC7;A0A024R897;Q9BPX5	Actin-related protein 2/3 complex subunit 5;Actin-related protein 2/3 complex subunit 5-like protein	ARPC5L	69	69	0
E9PR30;P62861	40S ribosomal protein S30	FAU	70	70	0
M1VE83;M1VKI3;P31431;B4E1S6;M1VRM8	Tyrosine-protein kinase receptor;Syndecan-4;Syndecan	SDC4-ROS1_S4;R34;SDC4-ROS1_S4;R32;SDC4;SDC4-ROS1_S2;R32	70	70	0
Q9HCU5;B5MC98;A8K813;Q05DB2	Prolactin regulatory element-binding protein	PREB	71	71	0
Q9Y5X3;Q5QPE4;Q53FH8;Q6P5V6;Q5QPE5;B7Z476	Sorting nexin-5	SNX5	73	73	0
Q96EL3	39S ribosomal protein L53, mitochondrial	MRPL53	73	73	0
P63096;C9JPP4	Guanine nucleotide-binding protein G(i) subunit alpha-1	GNAI1	74	74	0
Q59GY3;A8K588;Q13247;V9HVZ0	Serine/arginine-rich splicing factor 6	SRSF6;HEL-S-91	75	75	0
Q8IXM3	39S ribosomal protein L41, mitochondrial	MRPL41	75	75	0
H3BPG5;H3BV80;H3BMM9;H3BTC0;D3DU92;Q15287;H3BMS0;A0A024R9P1	RNA-binding protein with serine-rich domain 1	RNPS1;hCG_2026745	75	75	0
A6MUU8		MIF	75	75	0
Q07812;K4JQN1;A0A0C4MW46;A0A0C4MWS3;A0A0C4MVT1	Apoptosis regulator BAX	BAX;Bax	75	75	0
Q541A5;Q92890;B4E3I3;B7Z9N3	Ubiquitin fusion degradation protein 1 homolog	ufd1;UFD1L	75	75	0
P50914	60S ribosomal protein L14	RPL14	76	76	0
V9HWC5;F5GWE5;Q6NUL6;Q00169;B4E1U1;I3L4H1;I3L471;I3L4C0;I3L4U7;I3L459	Phosphatidylinositol transfer protein alpha isoform	HEL-S-36;PITPNA	76	76	0
A0A0S2Z6I7;A0A0S2Z5Z3;H0Y8L5;E9PFJ4		MLIP	76	76	0
A0A087X1J7;P22352	Glutathione peroxidase;Glutathione peroxidase 3	GPX3	77	77	0
V9GZ56;Q9Y4Z0;M0QXB0;U3KQS7;U3KQK1	U6 snRNA-associated Sm-like protein LSm4	LSM4	77	77	0
V9HW32;Q8N8N7;G3V3Y1	Prostaglandin reductase 2	HEL-S-298;PTGR2	77	77	0
F6SDV2;Q9GZM7;B4DVG5	Tubulointerstitial nephritis antigen-like	TINAGL1	78	78	0
Q5VYK3;J3KN16;B3KXF2	Proteasome-associated protein ECM29 homolog	ECM29;KIAA0368	79	79	0
Q9Y2I8;C9JGR9;E7EQ49;A0A087WTQ2	WD repeat-containing protein 37	WDR37	79	79	0
P04350;B4DE77;B4DJ43;B4DFH6	Tubulin beta-4A chain	TUBB4A	80	80	0
A2RTX5;B7ZLP8	Probable threonine--tRNA ligase 2, cytoplasmic	TARSL2	80	80	0
Q53F27;A0A024R001;Q9P0S9	Transmembrane protein 14C	TMEM14C	80	80	0
CON__Q3ZBD7			81	81	0
E9PJ81;E9PRQ7;A0A024R598;A0A024R539;Q04323;B4E0P8;Q05BV2;B4DNC6;A0A087WTZ5	UBX domain-containing protein 1	UBXN1;LOC51035	81	81	0
A8K6H1;A0A0A7E7X3;A0A0A7E7W9;A0A0A7E7W5;A0A0A7E7T3;A0A0A7E7S5;A0A0A7E6P9;A0A0A7E6P4;A0A0A7E6P0;A0A0A7E6I2;A0A0A7E6D8;A0A0A7E6D4;A0A024RAR8;Q9NZ08;A0A0A7E6K0;A0A0A7E6J5;A0A075BV59;A0A075BSP6;A0A075BTL2	Endoplasmic reticulum aminopeptidase 1	ERAP1;ARTS-1	81	81	0
V9HWB2;Q14353;B4DMJ3	Guanidinoacetate N-methyltransferase	HEL-S-20;GAMT	81	81	0
Q9BW34		EEF1D	81	81	0
Q53YE7;Q53EZ0;P21397;Q49A63;Q5ULA3	Amine oxidase [flavin-containing] A	MAOA	82	82	0
Q96HE7	ERO1-like protein alpha	ERO1L	82	82	0
G1UI22;A8MQ02		MLLT4	83	83	0
E5RGX5;B7Z4N6;Q93045	Stathmin;Stathmin-2	STMN2	83	83	0
O15371;B4E1K8	Eukaryotic translation initiation factor 3 subunit D	EIF3D	83	83	0
P35270;B4DSF0	Sepiapterin reductase	SPR	83	83	0
B7ZB80;A0A140VKB3;P21953;B4E2N3;A0A0K2GN21	2-oxoisovalerate dehydrogenase subunit beta, mitochondrial	BCKDHB	84	84	0
K7EKV4;A0A024R1X3;Q9BRG1	Vacuolar protein-sorting-associated protein 25	VPS25	84	84	0
Q6FIA3;A0A0U1RR22;Q9UNF0;A0A024R4X1;B0QYG7;B0QYG8	Protein kinase C and casein kinase substrate in neurons protein 2	PACSIN2	85	85	0
H3BPB8;P34949;H3BMZ9;Q8NHZ6;H3BPP3;H3BP57;H3BT48;H3BUZ9;B4DFC4;F5GX71;B4DW50;H3BPM5;H3BPU7;H3BU66;H3BQX0;H3BNY8;H3BT46	Mannose-6-phosphate isomerase	MPI	85	85	0
A8K4W8;A0A024R1A4;P68036	Ubiquitin-conjugating enzyme E2 L3	UBE2L3	85	85	0
Q9HD33	39S ribosomal protein L47, mitochondrial	MRPL47	85	85	0
V9HVZ7		HEL-176	86	86	0
E7ES08;E7EQU1;O15347;E9PES6;Q7Z684	High mobility group protein B3	HMGB3;DKFZp779G118	86	86	0
J3QT28;A0A140VJF3;O43684;B4DDM6;J3QSX4	Mitotic checkpoint protein BUB3	BUB3	86	86	0
A0A024QZJ6;A0A024QZJ4;B1PS43;P35749;Q7Z7R0	Myosin-11	MYH11	86	86	0
Q14566;Q4ZG57	DNA replication licensing factor MCM6	MCM6	86	86	0
J3KNF4;O14618;E9PP76	Copper chaperone for superoxide dismutase;Superoxide dismutase [Cu-Zn]	CCS	86	86	0
C9JA28;Q9UNL2	Translocon-associated protein subunit gamma	SSR3	87	87	0
Q8NCW8;B4DEN6;A0A024R2M6;P09110;H7C131;C9JDE9;A0A140VJX0;H0Y4D4	3-ketoacyl-CoA thiolase, peroxisomal	ACAA1	87	87	0
A8K4A8;A0A024R8Z9;Q6PI48;Q9H9J7;Q9NVT8	Aspartate--tRNA ligase, mitochondrial	DARS2	87	87	0
Q8NFW8;Q53GF0	N-acylneuraminate cytidylyltransferase	CMAS	87	87	0
A0A0A0MQY0;Q53GG5;A0A087WYF8	PDZ and LIM domain protein 3	PDLIM3	87	87	0
A0A024R4T4;P61081	NEDD8-conjugating enzyme Ubc12	UBE2M	87	87	0
A0A0P1J1R0;Q5W0H4;A0A0B4J2C3;P13693;J3KPG2;E9PJF7;Q9UP43;B4DKJ4;B4DLD6	Translationally-controlled tumor protein	TPT1	87	87	0
Q541S4;Q548C9;B1AMS2;Q6B514;B4DZW0;Q8NFH9;Q14141;Q6NT82;B4E049;B4DPT4;Q8NFI2;Q8NFI0	Septin-6	2018-09-06	87	87	0
Q9Y3L5	Ras-related protein Rap-2c	RAP2C	87	87	0
O15511;B1ALC0	Actin-related protein 2/3 complex subunit 5	ARPC5	87	87	0
B4DSI9;B4DGF1;B2RU10;B2RU06;Q4LE58;Q04637;Q96I65	Eukaryotic translation initiation factor 4 gamma 1	EIF4G1;EIF4G1 variant protein	88	88	0
Q9H2G0;Q5W7F7;Q9BUI6;Q05086;A0A1B0GVL3;A0A0D9SG77;Q96GR7	Ubiquitin-protein ligase E3A	UBE3A	88	88	0
Q8TEM1	Nuclear pore membrane glycoprotein 210	NUP210	88	88	0
Q05DA4;O15460;Q5HYD8	Prolyl 4-hydroxylase subunit alpha-2	P4HA2;DKFZp686M0919	88	88	0
H0YMV8;Q71UM5;C9JLI6	40S ribosomal protein S27;40S ribosomal protein S27-like	RPS27L	88	88	0
O00116;B7Z3Q4;A0A1B0GWA2	Alkyldihydroxyacetonephosphate synthase, peroxisomal	AGPS	88	88	0
Q52LJ0	Protein FAM98B	FAM98B	88	88	0
Q6GSK2;P22570;B4DDI9;A0A0C4DFN8;A0A0A0MSZ4;A0A0A0MTR6;A0A0C4DGN7	NADPH:adrenodoxin oxidoreductase, mitochondrial	FDXR	89	89	0
Q9P2X2;Q53F03;B2R7N6;P43007;B7Z9M1;B7Z561	Amino acid transporter;Neutral amino acid transporter A	SLC1A4	89	89	0
V9HWE7;P51570;Q6ZP37;Q71UH7;K7ERJ9;B4E1A8	Galactokinase	HEL-S-19;GALK1	89	89	0
Q9NVE7;A0A0G2JR38;B4DHW9;E9PHT6;B4DZX1;Q7RTX2	Pantothenate kinase 4	PANK4	89	89	0
A0A024R7B7;Q16543;Q6FG59;K7EQA9;K7EKQ2	Hsp90 co-chaperone Cdc37;Hsp90 co-chaperone Cdc37, N-terminally processed	CDC37	89	89	0
B4DMT5;B3KSH1;O00303;B4DEW9	Eukaryotic translation initiation factor 3 subunit F	EIF3F	89	89	0
A7BI36;A0A0A0MRV0;Q9P2E9;A1A5C4;A1A5C5;F8W7S5;A0A087WVV2	Ribosome-binding protein 1	RRBP1	89	89	0
P07108;B8ZWD1;A0A024RAF2;A0A0A0MTI5;B8ZWD9;B8ZWD8	Acyl-CoA-binding protein	DBI	89	89	0
E9PKG1;Q5U8W9;H7C2I1;Q99873;A0A087X1W2;E9PIX6;B4DJ87	Protein arginine N-methyltransferase 1	PRMT1;HRMT1L2	89	89	0
A0A0A1TSG4;Q08722	Leukocyte surface antigen CD47	CD47	89	89	0
P56537	Eukaryotic translation initiation factor 6	EIF6	89	89	0
E7ESL0;J3KQY1;Q9NWU5	39S ribosomal protein L22, mitochondrial	MRPL22	89	89	0
A0A075X8B5;H9E785;A0A059QSR8;A0A141ZSL4;A0A141ZQA8;Q1ZY32;X5CDJ3;X5BLB3;V9N9T2;V9N9H0;V9N518;V9JFH6;V9J5G3;V9J548;V9J0Z6;V9IZQ9;V5JGF7;U5ZDA5;U5YXJ5;U5YT86;U3LDR4;U3LCU1;U3L9L1;U3L8Y8;U3L8P3;U3L6U8;U3L6N6;U3L6H7;T2HMQ7;T1Q5B1;T1Q517;S5RPJ8;S5RLC1;S4UQT8;R9Y4Q4;R9Y4D9;R9Y457;R9Y323;R9Y2B9;R9Y0J8;Q9T9Y1;Q9B2Y7;Q9B2Y5;Q9B2X8;Q9B2X6;Q9B2W5;Q9B2W2;Q9B1S7;Q9B188;Q9B0T8;Q8WCZ0;Q8WCY0;Q8W8T1;Q8HNR0;Q8HG2…	NADH-ubiquinone oxidoreductase chain 4	ND4;ndh4;NADH4;MT-ND4	89	89	0
Q6LES8;E5KSX8;E5KSU5;Q00059;H7BYN3	Transcription factor A, mitochondrial	TFAM	89	89	0
Q13131;Q96E92	5-AMP-activated protein kinase catalytic subunit alpha-1	PRKAA1	89	89	0
H0Y8X4;O43598	2-deoxynucleoside 5-phosphate N-hydrolase 1	DNPH1	89	89	0
Q549N5;Q9Y5M8;H7C4H2	Signal recognition particle receptor subunit beta	SRPRB	90	90	0
Q8N1F7;A8K897;H3BVG0	Nuclear pore complex protein Nup93	NUP93	90	90	0
P15954;D6R9Z7;Q71U45	Cytochrome c oxidase subunit 7C, mitochondrial	COX7C	90	90	0
Q15370;B8ZZU8;I3L0M9;A0A0B4J296	Transcription elongation factor B polypeptide 2	TCEB2	90	90	0
A0A140VKA9;P09417;B7Z415;D6RGG7	Dihydropteridine reductase	QDPR	90	90	0
E9PHI4;A0A146IHP0;A4D2Q0;O94901;A7MCZ7;H0Y6N5;H0Y742;B4E278;H7C2K3	SUN domain-containing protein 1	SUN1;UNC84A	90	90	0
Q53GF5;A0A024RA52;P25787;C9JCK5	Proteasome subunit alpha type;Proteasome subunit alpha type-2	PSMA2	90	90	0
Q9UBS4;B3KW63;H7C2Y5	DnaJ homolog subfamily B member 11	DNAJB11	90	90	0
J3KSS5;J3QRV4	Coronin	CORO6	90	90	0
A0A140VKC4;E9LUH3;D3YJ43;D0UU70;E9LUH4;P51608;E1B2J3;C6KG45;D9ZNA4;D5L9I5;A8K079;D6QZ43;A0A087X1U4;C6KG44;I6LM39;A0A075BPP5;A0A0S2Z401	Methyl-CpG-binding protein 2	MECP2	90	90	0
A0A024R5M3;Q14247;Q53HG7;Q76MU0	Src substrate cortactin	CTTN;EMS1	90	90	0
Q96DB5;H0YB03;H0YB83;E5RH53	Regulator of microtubule dynamics protein 1	RMDN1	90	90	0
A0A024R9J0;O60216	Double-strand-break repair protein rad21 homolog	RAD21	90	90	0
V9HWF0;A0A0A0MTH3;Q13418	Integrin-linked protein kinase	HEL-S-28;ILK	90	90	0
Q14240;E7EQG2;Q9NZE6;Q96B07	Eukaryotic initiation factor 4A-II;Eukaryotic initiation factor 4A-II, N-terminally processed	EIF4A2	90	90	0
Q15768	Ephrin-B3	EFNB3	90	90	0
P07741;H3BQZ9;H3BQF1;H3BQB1;H3BSW3	Adenine phosphoribosyltransferase	APRT	90	90	0
P49458	Signal recognition particle 9 kDa protein	SRP9	90	90	0
O95373;B3KQG6	Importin-7	IPO7	90	90	0
B1AQP2;Q9UHV9	Prefoldin subunit 2	PFDN2	90	90	0
Q5S9U8;A0A1B0W1F8;A0A075X6P1;Q53ZV6;H9A7H1;D7P652;D7P639;D7P626;B8X5X6;B2XIN1;A0A059RIX9;A0A023REG7;A0A023QG09;X5CM76;X5CKG0;X5CI32;X5CF88;X5CBQ3;X5BYA7;X5BWL7;X5BWF0;X5BVZ3;X5BVA2;X5BV52;X5BPC3;X2JJ49;W8DRA6;W8DIL7;W8DCA6;W8DBU7;W8DBM7;W8DAS2;W8D9V0;W8D9F9;W8D8R1;W0C6Q7;W0C3F1;V9PAU1;V9PAR5;V9PA42;V9NA48;V9N990;V9N6Q0;V9N6J1;V9N5T7;V9N4K8;V9M765;V9K141;V9JYL6;V9JXJ3;V9JTH7;V9JMS4;V9JLL5;V9JJF5;V…	NADH-ubiquinone oxidoreductase chain 5	ND5;NADH5;ndh5;MT-ND5	90	90	0
P49773	Histidine triad nucleotide-binding protein 1	HINT1	91	91	0
V9HWC9;P00441;H7BYH4	Superoxide dismutase [Cu-Zn]	HEL-S-44;SOD1	91	91	0
J3KQA9;Q5JR59;B4DYN0	Microtubule-associated tumor suppressor candidate 2	MTUS2	91	91	0
E9PB90;P52789;Q68E10;A8K2U2;Q53QX9	Hexokinase;Hexokinase-2	HK2;DKFZp686M1669	91	91	0
O95140;B7Z3H8	Mitofusin-2	MFN2	91	91	0
E5KND5;Q96RP9;C9IZ01;D3DNL3;F8WAU4	Elongation factor G, mitochondrial	GFM1	91	91	0
Q05CP8;A0A024QZJ7;Q16204	Coiled-coil domain-containing protein 6	CCDC6	91	91	0
P82979;Q567R9;F8VZQ9;H0YHG0;A4D286	SAP domain-containing ribonucleoprotein	SARNP;CIP29;LOC402290	91	91	0
P52788;H7C2R7;B4DE40	Spermine synthase	SMS	91	91	0
P54646;B2RA25;A0MZF5;A0A087WXX9	5-AMP-activated protein kinase catalytic subunit alpha-2	PRKAA2	91	91	0
P55795;B4DFK9;B4DP00	Heterogeneous nuclear ribonucleoprotein H2	HNRNPH2	91	91	0
D3DNI2;C9J0J7;G5E9Q6;B4DNH1;D3DNI3	Profilin	PFN2	91	91	0
O43815;Q3B874	Striatin	STRN	91	91	0
P16152;E9PQ63;A8MTM1	Carbonyl reductase [NADPH] 1	CBR1	91	91	0
B2R5V9;A0A024R4E5;Q00341;H0Y394;B4DKR8;Q6ZS03;Q96CF6	Vigilin	HDLBP	91	91	0
Q8WXH0;A0A0C4DGK3	Nesprin-2	SYNE2	91	91	0
A4D177;Q13185	Chromobox protein homolog 3	CBX3	91	91	0
Q53EW7;O15382;B3KSI3;M0QXF9;M0QZ10;M0QZP4	Branched-chain-amino-acid aminotransferase;Branched-chain-amino-acid aminotransferase, mitochondrial	BCAT2	91	91	0
F8W031;F8VXJ7;Q9Y2B0;F8W1K5	Protein canopy homolog 2	CNPY2	91	91	0
A0A024RDQ0;A0A024RDS1;Q92598;B4DF68;B4DY72	Heat shock protein 105 kDa	HSPH1	91	91	0
B4DSV8;B4DPG9;Q9H3K2;Q6FIA7;B4DNL0;Q9Y6G2	Growth hormone-inducible transmembrane protein	GHITM	91	91	0
A0A140TA52;A0A140TA41;A0A140TA33;P22105;A0A140T9C0;A0A140T902;A0A140T8Y3;A0A140T8Z8;A0A140T956;A0A087X0I0	Tenascin-X	TNXB	91	91	0
O95822	Malonyl-CoA decarboxylase, mitochondrial	MLYCD	91	91	0
Q6MZV7;Q6PYX1		DKFZp686C11235	91	91	0
Q05707;A8KAL5;J3QT83	Collagen alpha-1(XIV) chain	COL14A1	91	91	0
B3KRI1;B1AKY9;B2RAQ4;A0A0S2Z3W6;P50993;B3KX35;H0Y7C1;B4DIQ8	Sodium/potassium-transporting ATPase subunit alpha-2	ATP1A2	91	91	0
Q6IBA2;Q59G24;P53999;B7Z1Z0	Activated RNA polymerase II transcriptional coactivator p15	PC4;SUB1	91	91	0
Q93008;D3DWB6	Probable ubiquitin carboxyl-terminal hydrolase FAF-X;Ubiquitin carboxyl-terminal hydrolase	USP9X	91	91	0
Q9BTZ2;D5KJA1;D5KJA2;F5GWZ1	Dehydrogenase/reductase SDR family member 4	DHRS4;DHRS4L2	91	91	0
Q5JRI1;Q53GD7;A0A0S2Z504;O75494	Serine/arginine-rich splicing factor 10	SRSF10	91	91	0
A0A024R718;P43490;A0A0C4DFS8	Nicotinamide phosphoribosyltransferase	PBEF1;NAMPT	91	91	0
Q96BS4;P22087;M0R299;M0QXL5;M0R2Q4;B4DLD4;M0R0P1	rRNA 2-O-methyltransferase fibrillarin	FBL	91	91	0
J3KTF8;V9HWE8;J3QQX2;P52565;J3KRE2;J3QW41;A0A0S2Z3D9;J3KRY1	Rho GDP-dissociation inhibitor 1	ARHGDIA;HEL-S-47e	91	91	0
A8K4T6;Q16401	26S proteasome non-ATPase regulatory subunit 5	PSMD5	91	91	0
Q8N335;C9JM46	Glycerol-3-phosphate dehydrogenase 1-like protein;Glycerol-3-phosphate dehydrogenase [NAD(+)]	GPD1L	91	91	0
Q53RX3;Q9HBH5	Retinol dehydrogenase 14	RDH14	91	91	0
Q9Y512	Sorting and assembly machinery component 50 homolog	SAMM50	91	91	0
H7C1U8;Q9BUR5;G3V1B6	Apolipoprotein O	APOO	91	91	0
Q13564	NEDD8-activating enzyme E1 regulatory subunit	NAE1	91	91	0
B7Z829;B7ZLA9;Q9C0E8;B7Z7F5	Protein lunapark	KIAA1715;LNP	91	91	0
P29373;Q5SYZ4	Cellular retinoic acid-binding protein 2	CRABP2	91	91	0
Q9NVH6	Trimethyllysine dioxygenase, mitochondrial	TMLHE	91	91	0
A0A140VJY7;Q9BRA2;I3L0K2;I3L3M7;I3L2R6	Thioredoxin domain-containing protein 17	TXNDC17	91	91	0
P42166	Lamina-associated polypeptide 2, isoform alpha;Thymopoietin;Thymopentin	TMPO	91	91	0
A0A0A0N0L3;A0A024R4E2;Q13148;A0A087WX29;B1AKP7;G3V162;A0A087X260;A0A087WYY0;K7EJM5;A0A0A0N0N3;A0A0A0N0M3;B4DRW3;A0A087WXQ5;A0A087WV68	TAR DNA-binding protein 43	TDP43;TARDBP	91	91	0
Q5VWP3;E2QRH6	Muscular LMNA-interacting protein	MLIP	91	91	0
Q86Y39;K7EQ77;K7EK78;K7EP35;K7EMT4	NADH dehydrogenase [ubiquinone] 1 alpha subcomplex subunit 11	NDUFA11	91	91	0
Q9P035;H3BS72;H3BPZ1	Very-long-chain (3R)-3-hydroxyacyl-CoA dehydratase 3	HACD3	91	91	0
A0A0S2Z4Q2;Q15582;Q53GU8;A0A0S2Z4K6;H0Y8L3	Transforming growth factor-beta-induced protein ig-h3	TGFBI	91	91	0
K7EJR3;Q5U0B3;R4GMR5;V9HW09;P48556;K7EJC1;B4E2Y4	26S proteasome non-ATPase regulatory subunit 8	PSMD8;HEL-S-91n	91	91	0
A0A024R326;Q6IPI1;P47914	60S ribosomal protein L29	RPL29	91	91	0
P27348;B4DMT8;Q53S41;B4DY04;E9PG15	14-3-3 protein theta	YWHAQ	91	91	0
Q9BV79;B4DV18;H3BM30	Trans-2-enoyl-CoA reductase, mitochondrial	MECR	91	91	0
P08708;H0YN88;A0A075B716;H0YN73	40S ribosomal protein S17	RPS17	91	91	0
F5GXX5;P61803;Q53G02;F5H895;A0A0B4J239	Dolichyl-diphosphooligosaccharide--protein glycosyltransferase subunit DAD1	DAD1	91	91	0
A0A0S2Z489;O00232;A0A0S2Z476	26S proteasome non-ATPase regulatory subunit 12	PSMD12	91	91	0
A4D2P1;A4D2P0;P63000;A4D2P2;A0A024R9T5;A0A024R1P2;P60763;P15153	Ras-related C3 botulinum toxin substrate 1;Ras-related C3 botulinum toxin substrate 3;Ras-related C3 botulinum toxin substrate 2	RAC1;hCG_20693;RAC2;RAC3	91	91	0
A0A087WZE9		HMGN3	91	91	0
A0A024R5W6		TPM1	91	91	0
J3QR09;J3KTE4;P84098;Q53G49;Q8IWR8;J3QL15	Ribosomal protein L19;60S ribosomal protein L19	RPL19	91	91	0
Q9Y3U8;J3QSB5	60S ribosomal protein L36	RPL36	91	91	0
A0AVP6;Q5H8X8;O95399	Urotensin-2	UTS2	91	91	0
P55060;B4DM31;B4DUC5;B4DM67;B4DPS6	Exportin-2	CSE1L	92	92	0
CON__P13645;P13645	Keratin, type I cytoskeletal 10	KRT10	92	92	0
CON__P02754			92	92	0
A0A024RA75;P31937	3-hydroxyisobutyrate dehydrogenase;3-hydroxyisobutyrate dehydrogenase, mitochondrial	HIBADH	92	92	0
G3XAH0;Q59GE1;C9JM82;B4DJ62;X5DNA9;Q7KYV2;Q99648;Q99719;E7EPG2;E7EX32	Septin-5	SEPT5;CDCrel-1	92	92	0
Q13435;E9PPJ0;Q7Z3K9;E9PJ04;H0YCG1	Splicing factor 3B subunit 2	SF3B2;DKFZp781L0540	92	92	0
P21333;Q5HY54;Q60FE6;Q60FE5	Filamin-A	FLNA	92	92	0
A0A024R7T3;P52597;B4DKS8	Heterogeneous nuclear ribonucleoprotein F;Heterogeneous nuclear ribonucleoprotein F, N-terminally processed	HNRPF;HNRNPF	92	92	0
A0A024R7F9;Q92947;B4DK85;B4DUY0	Glutaryl-CoA dehydrogenase, mitochondrial	GCDH	92	92	0
B5BTZ6;P40763;G8JLH9;B4DNP0;B7ZA24;B4DVR6	Signal transducer and activator of transcription;Signal transducer and activator of transcription 3	STAT3	92	92	0
A8KAK1;Q9NYU2	UDP-glucose:glycoprotein glucosyltransferase 1	UGGT1	92	92	0
D9YZU5;P68871;C8C504;Q0Z944;Q9BWV6;Q9GZL9;B3VL86;Q14473;Q8IZI0;Q3LR79;Q4TWB7;A0A1B4WRL5;Q9UK54;B3VL31;Q6V0K9;Q52MT0;E9NGZ5;B3VL05;Q4JLR8;B2M1S6;B5ANL9;F8W6P5;Q3Y9I8;Q4TZM4;B3VL17	Hemoglobin subunit beta;LVV-hemorphin-7;Spinorphin	HBB	92	92	0
Q7Z406	Myosin-14	MYH14	92	92	0
Q32MK0	Myosin light chain kinase 3	MYLK3	92	92	0
H6VRG3;H6VRG0;H6VRF8;H6VRG1;P04264;H6VRF9;CON__P04264	Keratin, type II cytoskeletal 1	KRT1	92	92	0
Q92743;Q05DJ8;B3KRN4	Serine protease HTRA1	HTRA1	92	92	0
O43464;A0A0C4DG44;A8K7G2	Serine protease HTRA2, mitochondrial	HTRA2	92	92	0
Q15008;B3KT66;C9J0E9	26S proteasome non-ATPase regulatory subunit 6	PSMD6	92	92	0
Q6FHV6;P09104;A8K3B0;F5H0C8	Gamma-enolase;Enolase	ENO2	92	92	0
A0A024RE27;Q96GK7;Q6P2I3;D3DXG4;D3DXG5	Fumarylacetoacetate hydrolase domain-containing protein 2A;Fumarylacetoacetate hydrolase domain-containing protein 2B	FAHD2A;FAHD2B;hCG_2002650	92	92	0
A0A140VKF9;Q96DC8;Q5W0J8	Enoyl-CoA hydratase domain-containing protein 3, mitochondrial	ECHDC3	92	92	0
X5D2M8;Q14764;X5D7K9;B4DXN0;B4DDR2;B4DP93;X5DNU0;X5D7S8	Major vault protein	MVP	92	92	0
V9HWE9;P09211;A8MX94	Glutathione S-transferase P	HEL-S-22;GSTP1	92	92	0
Q53H26;Q06AH7;P02787;B4DI57;B4DHZ6	Serotransferrin	TF	92	92	0
P04040;B4DWK8	Catalase	CAT	92	92	0
Q9Y6G9;B3KM42;E9PHI6;B4DDM4;Q6MZE7	Cytoplasmic dynein 1 light intermediate chain 1	DYNC1LI1;DKFZp686A1525	92	92	0
V9HWB8;P14618;B4DNK4;Q8WUW7	Pyruvate kinase;Pyruvate kinase PKM	HEL-S-30;PKM;PKM2	92	92	0
Q547S8;Q16134;B4DEQ0;A7UNU5	Electron transfer flavoprotein-ubiquinone oxidoreductase, mitochondrial	ETFDH	92	92	0
O15173	Membrane-associated progesterone receptor component 2	PGRMC2	92	92	0
A6NNK5;Q12888;B7Z3E7;A8KA50	Tumor suppressor p53-binding protein 1	TP53BP1	92	92	0
Q15019;C9J938;C9JB25	Septin-2	2018-09-02	92	92	0
Q86VX4;Q9UQE7;B0AZQ4	Structural mainte ce of chromosomes protein;Structural mainte ce of chromosomes protein 3	SMC3	92	92	0
Q15075;A8K7J3	Early endosome antigen 1	EEA1	92	92	0
Q9UII2	ATPase inhibitor, mitochondrial	ATPIF1	92	92	0
O95782	AP-2 complex subunit alpha-1	AP2A1	92	92	0
Q96A26;F8W7Q4;E9PH05;B4DF97	Protein FAM162A	FAM162A	92	92	0
O14980;B7ZB16;B3KWD0;B4DR01	Exportin-1	XPO1	92	92	0
CON__P35908;P35908	Keratin, type II cytoskeletal 2 epidermal	KRT2	92	92	0
Q14914;A0A024R172	Prostaglandin reductase 1	PTGR1;LTB4DH	92	92	0
O95202;D3DVQ1	LETM1 and EF-hand domain-containing protein 1, mitochondrial	LETM1	92	92	0
E5RIW3;Q6FGD7;E5RJD8;O75347;E5RHG6	Tubulin-specific chaperone A	TBCA	92	92	0
A0A0F7KYT8;A0A0F7L1S3;P51114;A0A0F7L0Q8;B4DXZ6;E9PFF5;B4DM21;B4DM78;E7EU85;B4DGH9	Fragile X mental retardation syndrome-related protein 1	FXR1	92	92	0
A0A140VJK1;O76003	Glutaredoxin-3	GLRX3	92	92	0
Q6P5S8		IGK@	92	92	0
B2R6K4;A0A024R056;P62873;F6UT28;B1AKQ8;F6X3N5	Guanine nucleotide-binding protein G(I)/G(S)/G(T) subunit beta-1	GNB1	92	92	0
J3KP15;Q53FN0;A0A024R8U5;Q01130;J3QL05;B3KUY1;Q8NAK9;B3KX15;Q6NXQ0;Q8N220;B3KVY2;B3KUF7	Serine/arginine-rich splicing factor 2	SRSF2;SFRS2	92	92	0
Q8WYJ5;Q9BX68;Q53HJ8	Histidine triad nucleotide-binding protein 2, mitochondrial	HINT2	92	92	0
A0A024RA94;P55001	Microfibrillar-associated protein 2	MFAP2	92	92	0
H3BPE1;H3BQK9;Q9UPN3;H0Y390	Microtubule-actin cross-linking factor 1, isoforms 1/2/3/5	MACF1	92	92	0
Q01449;H7C243	Myosin regulatory light chain 2, atrial isoform	MYL7	92	92	0
Q6IBG1;P24844	Myosin regulatory light polypeptide 9	MYL9	92	92	0
P17858;Q7L2M7	ATP-dependent 6-phosphofructokinase, liver type	PFKL	92	92	0
D3DSW3;O94903;A8K520;E5RG77;B3KMP6;E5RFX7	Proline synthase co-transcribed bacterial homolog protein	PROSC	92	92	0
Q96EY7;B2RDU4	Pentatricopeptide repeat domain-containing protein 3, mitochondrial	PTCD3	92	92	0
V9HWB7;P21399;Q9HBB2;Q59FI0	Aconitate hydratase;Cytoplasmic aconitate hydratase	HEL60;ACO1;IRP1	92	92	0
Q53FU1;Q7KZA3;P22830;Q5TZY0;B4DSA4;K7ELX4	Ferrochelatase;Ferrochelatase, mitochondrial	DKFZp686P18130;FECH	92	92	0
A0A087X054;Q9Y4L1;B7Z2N4;B3KXH0;B7Z766;E9PJ21;Q05D91;A0A087WWI4;Q6IN67;K7EQK2;B7Z602	Hypoxia up-regulated protein 1	HYOU1	92	92	0
Q5T4S7	E3 ubiquitin-protein ligase UBR4	UBR4	92	92	0
G5E9W7;G5E9V5;P82650;Q8NBL6;A8K9Y7;H7C5F2;H7C5H3	28S ribosomal protein S22, mitochondrial	MRPS22	92	92	0
A0A0D9SFK2;A0A024QZ63;Q92614;B4DZ32	Unconventional myosin-XVIIIa	MYO18A;hCG_27198	92	92	0
I6L894;A0A024RDK2;Q01484;A0A024RDI4;B7Z636;E9PHW9;D6RHE1;A0A0U1RQN6;B7Z651	Ankyrin-2	ANK2	92	92	0
Q05CK9;O60506;B2R8Z8;Q59GL1;B7Z645	Heterogeneous nuclear ribonucleoprotein Q	SYNCRIP	92	92	0
Q5D044;H0UI49;B7Z938		LAMA4	92	92	0
B4E266;B2RCM2;Q9P2J5;B4DER1;Q9H8E3	Leucine--tRNA ligase, cytoplasmic	LARS	92	92	0
V9HW90;P00390	Glutathione reductase, mitochondrial	HEL-75;GSR	92	92	0
P19021;B4DKE0;H7BYD9	Peptidyl-glycine alpha-amidating monooxygenase;Peptidylglycine alpha-hydroxylating monooxygenase;Peptidyl-alpha-hydroxyglycine alpha-amidating lyase	PAM	92	92	0
A0A140VK73;Q9NPH2;B3KSG0;B7Z3K3	Inositol-3-phosphate synthase 1	ISYNA1	92	92	0
P50402;Q5HY57	Emerin	EMD	92	92	0
Q53HG3;Q53GC8;A0A0C4DGA2;A0A024QZU5;O75521;B4DLL3;Q59E94;Q9NYD2;F1LLU7;F8WAW4;C9JB63	Enoyl-CoA delta isomerase 2, mitochondrial	ECI2;PECI;HCA64	92	92	0
A4D0W4;Q9UDR5;F8WAH1;F8WE53	Alpha-aminoadipic semialdehyde synthase, mitochondrial;Lysine ketoglutarate reductase;Saccharopine dehydrogenase	AASS	92	92	0
A8K916;A0A140VJE8;P63010;H0UID5;H0UID4;H0UID3;A8K0G3;Q68DI0;A0A087X253;B4DWG4;A0A087WU93;A0A087WZQ6;B4E261;A0A087WYD1;Q96EL6	AP complex subunit beta;AP-2 complex subunit beta	AP2B1;DKFZp781K0743	92	92	0
B4DY09;F4ZW62;Q12905;Q53FG3;F4ZW63	Interleukin enhancer-binding factor 2	ILF2	92	92	0
Q9H2U2;B4DR66;D6R967	Inorganic pyrophosphatase 2, mitochondrial	PPA2	92	92	0
A0A024R1T5;P09543	2,3-cyclic-nucleotide 3-phosphodiesterase	CNP	92	92	0
Q9BTT5;Q16795;A8K4V2	NADH dehydrogenase [ubiquinone] 1 alpha subcomplex subunit 9, mitochondrial	NDUFA9	92	92	0
Q9UJ70;H7C3G9;C9JEV6;H7C1L7;H0YEB7	N-acetyl-D-glucosamine kinase	NAGK	92	92	0
P02461	Collagen alpha-1(III) chain	COL3A1	92	92	0
O15061;A0A075B7B1;H0YL34	Synemin	SYNM	92	92	0
P43034;B4DZN3	Platelet-activating factor acetylhydrolase IB subunit alpha	PAFAH1B1	92	92	0
P21912;A0A087WWT1;A0A087WXX8	Succinate dehydrogenase [ubiquinone] iron-sulfur subunit, mitochondrial	SDHB	92	92	0
Q53HS0;P47897;A8K3A8;B4DNN3	Glutamine--tRNA ligase	QARS	92	92	0
I3L397;I3L504;P63241;Q6IS14	Eukaryotic translation initiation factor 5A;Eukaryotic translation initiation factor 5A-1;Eukaryotic translation initiation factor 5A-1-like	EIF5A;EIF5AL1	92	92	0
V9HWJ5;Q15274;C9JCJ5	Nicotinate-nucleotide pyrophosphorylase [carboxylating]	HEL-S-90n;QPRT	92	92	0
B4DFR2;Q9NP97;A0A140VJH9;B1AKR6;Q8TF09	Dynein light chain roadblock-type 1;Dynein light chain roadblock-type 2	DYNLRB1;DYNLRB2	92	92	0
B0YJ88;P35241;B7Z2S7;Q6PKD3;Q05CU6	Radixin	RDX	92	92	0
P54289;Q9UIU0;Q9UDQ3	Voltage-dependent calcium channel subunit alpha-2/delta-1;Voltage-dependent calcium channel subunit alpha-2-1;Voltage-dependent calcium channel subunit delta-1	CACNA2D1;WUGSC:H_DJ0560O14.1	92	92	0
P07951;Q5TCU8	Tropomyosin beta chain	TPM2	92	92	0
A0A024R4H0;Q02809;B2R5M9;B4DGN8;B4DHT1	Procollagen-lysine,2-oxoglutarate 5-dioxygenase 1	PLOD1	92	92	0
Q9Y305;H7C5Q2	Acyl-coenzyme A thioesterase 9, mitochondrial	ACOT9	92	92	0
P49327;A0A0U1RQF0	Fatty acid synthase;[Acyl-carrier-protein] S-acetyltransferase;[Acyl-carrier-protein] S-malonyltransferase;3-oxoacyl-[acyl-carrier-protein] synthase;3-oxoacyl-[acyl-carrier-protein] reductase;3-hydroxyacyl-[acyl-carrier-protein] dehydratase;Enoyl-[acyl-carrier-protein] reductase;Oleoyl-[acyl-carrier-protein] hydrolase	FASN	92	92	0
Q9Y2X3;B3KN82	Nucleolar protein 58	NOP58	92	92	0
Q8N766	ER membrane protein complex subunit 1	EMC1	92	92	0
Q9HDC9;H0Y512	Adipocyte plasma membrane-associated protein	APMAP	92	92	0
D6RGG3;Q99715;A0A087X0A8;B9EJB8	Collagen alpha-1(XII) chain	COL12A1	92	92	0
A0A0S2Z3H3;P12235;V9GYG0;A0A0S2Z359;A0A0S2Z3C4	ADP/ATP translocase 1	SLC25A4	92	92	0
Q9BR39;B4E3T9;Q86VZ3	Junctophilin-2	JPH2	92	92	0
Q6P587	Acylpyruvase FAHD1, mitochondrial	FAHD1	92	92	0
A0A0S2Z3P9;P45954	Short/branched chain specific acyl-CoA dehydrogenase, mitochondrial	ACADSB	92	92	0
Q9BS92;F2Z3L7	Protein NipSnap homolog 3B	NIPSNAP3B	92	92	0
B3KN57;B3KML1;O60749;Q53GG3	Sorting nexin-2	SNX2	92	92	0
P25398	40S ribosomal protein S12	RPS12	92	92	0
Q16643;D6R9W4;B3KSQ7	Drebrin	DBN1	92	92	0
V9HWF9;O95861;A6NF51;F8W1J0;B7Z9J7	3(2),5-bisphosphate nucleotidase 1	HEL20;BPNT1	92	92	0
Q567R0;P07919	Cytochrome b-c1 complex subunit 6, mitochondrial	UQCRH	92	92	0
A0A140VK45;P20618;Q53FT8	Proteasome subunit beta type-1;Proteasome subunit beta type	PSMB1	92	92	0
A0A087X208;O00468	Agrin;Agrin N-terminal 110 kDa subunit;Agrin C-terminal 110 kDa subunit;Agrin C-terminal 90 kDa fragment;Agrin C-terminal 22 kDa fragment	AGRN	92	92	0
Q5VVD0;P62913;Q08ES8;Q5VVC8;Q5VVC9	60S ribosomal protein L11	RPL11	92	92	0
F5H5N1;B7Z1U1;A8K0V6;Q8NAS7;Q7LD69;F5GXJ1;O75251;B7Z4P1;Q6ZQU6;A0A087WTI3	NADH dehydrogenase [ubiquinone] iron-sulfur protein 7, mitochondrial	NDUFS7	92	92	0
P62314;Q7Z5A3;J3QLI9	Small nuclear ribonucleoprotein Sm D1	SNRPD1	92	92	0
Q14683;G8JLG1;Q6P2R1;A8K7A6;Q6MZR8;B7Z709	Structural mainte ce of chromosomes protein 1A;Structural mainte ce of chromosomes protein	SMC1A;DKFZp686L19178	92	92	0
A0A024QZX3;P35237;A0A024QZX5;A0A087X1N8;Q8IXH2	Serpin B6	SERPINB6	92	92	0
P49321;Q53H03;B4DS57;Q6PJY7	Nuclear autoantigenic sperm protein	NASP	92	92	0
A0A024R2Q4;P61313;B4DLP4;E7EQV9;E7ENU7;B4DEN1	Ribosomal protein L15;60S ribosomal protein L15	RPL15	92	92	0
Q9UJZ1;A0A087WYB4;Q6ZNW0	Stomatin-like protein 2, mitochondrial	STOML2	92	92	0
Q9BSH4	Translational activator of cytochrome c oxidase 1	TACO1	92	92	0
A0A087WXM6;J3QQT2;J3KRX5;A0A024R261;A0A0A6YYL6;P18621;J3QLC8;A0A0A0MRF8;J3KRB3;A0A087WWH0;J3QS96	60S ribosomal protein L17	RPL17;hCG_24487;RPL17-C18orf32	92	92	0
V9HW38;P28838;B4DQG5;H0Y9Q1	Cytosol aminopeptidase	HEL-S-106;LAP3	92	92	0
P53621	Coatomer subunit alpha;Xenin;Proxenin	COPA	92	92	0
A0A024RDS2;Q15063;A0A024RDT5	Periostin	POSTN	92	92	0
B2R774;A0A024R2A7;P49257;Q53FS4	Protein ERGIC-53	LMAN1	92	92	0
P51571;A6NLM8	Translocon-associated protein subunit delta	SSR4	92	92	0
B4DRA0;Q68DD9;B4E1M7;Q14498;B4DLM0;B3KWX7;B7Z4L7;Q6N037;E1P5S2;Q7Z3L0;Q6MZY7;G3XAC6;A0A0U1RQH7;H0Y4X3	RNA-binding protein 39	DKFZp781C0423;RBM39;DKFZp686A11192;RNPC2;DKFZp781I1140;DKFZp686C17209	92	92	0
Q6IA66;B3KVU6;Q4LE40;Q7Z3D6;Q53HP9;H0YB09;A0A0C4DGD4;H0YB62	UPF0317 protein C14orf159, mitochondrial	C14orf159;C14orf159 variant protein	92	92	0
Q5T6L4;P00966;A8KAP9;B4E395	Argininosuccinate synthase	ASS;ASS1	92	92	0
Q59H57;B4DR70;A8K4H1;Q8TBR3;Q6IBQ5;H3BPE7;Q13344;P35637;Q70T18	RNA-binding protein FUS	FUS	92	92	0
Q2L6I2;Q8NE71;Q59F96;H0YGW7;B4DNU2	ATP-binding cassette sub-family F member 1	ABCF1	92	92	0
Q15393;A8K6V3;B3KQH1	Splicing factor 3B subunit 3	SF3B3	92	92	0
Q96IR1;B2R491;P62701;Q53HV1	40S ribosomal protein S4;40S ribosomal protein S4, X isoform	RPS4X	92	92	0
D1MGQ2;P69905;U6A216;E9M4D4;I1VZV6;A0A0K2BMD8;Q4ZGM8;E1B2D1;V9H1D9;Q9BX83;Q96T46	Hemoglobin subunit alpha	HBA2;HBA1	92	92	0
B4E0X8;E9PEB5;Q96AE4;B4DWL1;B4DT31;Q6PJY1;Q59FU3	Far upstream element-binding protein 1	FUBP1	92	92	0
A0A024R882;P27105;B4E2V5;B4DZK8	Erythrocyte band 7 integral membrane protein	STOM	92	92	0
P49588	Alanine--tRNA ligase, cytoplasmic	AARS	92	92	0
P62277;J3KMX5	40S ribosomal protein S13	RPS13	92	92	0
A0A024R2W4;Q14118	Dystroglycan;Alpha-dystroglycan;Beta-dystroglycan	DAG1	92	92	0
F8WJN3;Q16630;B4DSU9	Cleavage and polyadenylation specificity factor subunit 6	CPSF6	92	92	0
A0A140VK46;P28070;B4DFL3	Proteasome subunit beta type-4	PSMB4	92	92	0
A0A024QZ61;P54296;E7EWH9;B4DNE9;A0A0J9YVV7	Myomesin-2	MYOM2	92	92	0
V9HW89;Q00796;H0YLA4;B4DKI2	Sorbitol dehydrogenase	HEL-S-95n;SORD	92	92	0
A0A024R152;A0A024R167;C9JVY5		hCG_28765;AKAP2	92	92	0
Q9HAV7;B4DWV5	GrpE protein homolog 1, mitochondrial;GrpE protein homolog	GRPEL1	92	92	0
A0A0S2Z5A5;A0A024R8V0;Q9UHD8;A0A024R8Q0;A0A0S2Z5W9	Septin-9	2018-09-09	92	92	0
A0A140VJS3;P62195;Q59GS3;J3QSA9;J3QQM1;J3KRP2;J3QLH6	26S protease regulatory subunit 8	PSMC5	92	92	0
A0A024RAE4;B4E1U9;P60953;A0A024R9T1;B7ZAY4;B4DMH5;Q5JYX0;Q9UJM1	Cell division control protein 42 homolog	CDC42;hCG_39634	92	92	0
Q53FL7;P19320;E9PDD2	Vascular cell adhesion protein 1	VCAM1	92	92	0
E9PBS1;A0A024RD93;P22234;B4DGX3;D6RF62	Multifunctional protein ADE2;Phosphoribosylaminoimidazole-succinocarboxamide synthase;Phosphoribosylaminoimidazole carboxylase	PAICS	92	92	0
C9JME2;Q9Y4F1	FERM, RhoGEF and pleckstrin domain-containing protein 1	FARP1	92	92	0
A0A140VJJ2;P10768;X6RA14;H7BZT7	S-formylglutathione hydrolase	ESD	92	92	0
Q14008	Cytoskeleton-associated protein 5	CKAP5	92	92	0
E7EX90;Q14203;Q6MZZ3;Q6AWB1;Q6AWB3	Dynactin subunit 1	DCTN1;DKFZp686I0746;DKFZp686E0752;DKFZp686E191	92	92	0
G3XAI2;P07942;Q8TAS6	Laminin subunit beta-1	LAMB1	92	92	0
A0A0C4DGQ5;P04632;K7ELJ7;K7EM73;K7EIV0;A0A075B7C0;U3KQE2;K7EKD8	Calpain small subunit 1	CAPNS1	92	92	0
A0A024R1N1;P35579;Q86XU5	Myosin-9	MYH9	92	92	0
P25786;V9HW55;F5GX11;B4E0X6;B4DEV8	Proteasome subunit alpha type-1;Proteasome subunit alpha type	PSMA1;HEL-S-275	92	92	0
A0A024R4G1;Q8N1G4	Leucine-rich repeat-containing protein 47	LRRC47	92	92	0
P06753;Q8NAH0	Tropomyosin alpha-3 chain	TPM3;HEL-S-82p	92	92	0
O00567;A8K9K6;A0PJ92	Nucleolar protein 56	NOP56	92	92	0
Q53XC0;P05198;G3V4T5;H0YJS4	Eukaryotic translation initiation factor 2 subunit 1	EIF2S1	92	92	0
P11182;B4E1Q7;Q5VVL7	Lipoamide acyltransferase component of branched-chain alpha-keto acid dehydrogenase complex, mitochondrial	DBT	92	92	0
P35606	Coatomer subunit beta	COPB2	92	92	0
Q96CP5;B3KM34;O75439;A8K1E9;G3V0E4;B4DM90;Q9UG64;B3KQ85	Mitochondrial-processing peptidase subunit beta	PMPCB;DKFZp586I1223	92	92	0
J9R021;Q14152;Q24JU4;Q7Z5T5;Q6P1R0	Eukaryotic translation initiation factor 3 subunit A	eIF3a;EIF3A	92	92	0
E7ETK0;A0A087WUS0;P62847	40S ribosomal protein S24	RPS24	92	92	0
Q4G0N4;A0A0C4DGV3;A0A024R048;B7Z8V7	NAD kinase 2, mitochondrial	NADK2;FLJ30596	92	92	0
Q9UNZ2;Q53FE8;Q53FF5;F2Z2K0	NSFL1 cofactor p47	NSFL1C	92	92	0
A0A024RDP4;B4DWI8;Q8WXF1;X6RDA4	Paraspeckle component 1	PSPC1	92	92	0
A0A024RDG1;O60763	General vesicular transport factor p115	VDP;USO1	92	92	0
Q59G75;P41252;J3KR24;A0A0A0MSX9;Q7Z3U5;Q7Z355;Q6P0M4;B4DVX2;Q7L4K8	Isoleucine--tRNA ligase, cytoplasmic	IARS;DKFZp686L0869;DKFZp686L17145	92	92	0
Q86V81;E9PB61	THO complex subunit 4	ALYREF	92	92	0
Q9BRX8	Redox-regulatory protein FAM213A	FAM213A	92	92	0
E9PGT1;Q15631;H7C1D4;Q53GR3;B3KRM8;B7Z5D9	Translin	TSN	92	92	0
Q9Y6C9;Q53G34	Mitochondrial carrier homolog 2	MTCH2	92	92	0
O43678	NADH dehydrogenase [ubiquinone] 1 alpha subcomplex subunit 2	NDUFA2	92	92	0
B7ZA42			92	92	0
B2RE46;P04844;B4DJL0	Dolichyl-diphosphooligosaccharide--protein glycosyltransferase subunit 2	RPN2	92	92	0
Q8NE79	Blood vessel epicardial substance	BVES	92	92	0
Q53G69;O43615;Q9UPE4;M0QXU7	Mitochondrial import inner membrane translocase subunit TIM44	TIMM44;hTIM44	92	92	0
Q13151	Heterogeneous nuclear ribonucleoprotein A0	HNRNPA0	92	92	0
V9HW59;Q6LES2;P09525;Q6P452;B4DDZ4;B4DE02;Q59FK3	Annexin;Annexin A4	HEL-S-274;ANXA4	92	92	0
Q53YD8;P36404	ADP-ribosylation factor-like protein 2	hCG_23373;ARL2	92	92	0
P30837	Aldehyde dehydrogenase X, mitochondrial	ALDH1B1	92	92	0
R4GN98;P06703	Protein S100;Protein S100-A6	S100A6	92	92	0
Q9BR63;Q9NSD9;A8K666;B7ZB32	Phenylalanine--tRNA ligase beta subunit	FARSB	92	92	0
Q5VU08;Q9UEY8;Q59EK1;Q53FL4	Gamma-adducin	ADD3	92	92	0
Q502X2;A0A0S2Z5U7;Q9NR28;A0A024RBT2;A0A0S2Z5P6;Q53HB7;K7X1S0;F5H796;F5GXT8	Diablo homolog, mitochondrial	DIABLO	92	92	0
Q13424;B3KTR0	Alpha-1-syntrophin	SNTA1	92	92	0
Q8IUX7;B4DJB3	Adipocyte enhancer-binding protein 1	AEBP1	92	92	0
Q6ZP82;E7ERF0;B8ZZB3;C9JR62	Coiled-coil domain-containing protein 141	CCDC141	92	92	0
A0A024R674		SPTB	92	92	0
O75923	Dysferlin	DYSF	92	92	0
B2R6F3;P84103;A0A087X2D0	Serine/arginine-rich splicing factor 3	SFRS3;SRSF3	92	92	0
P16403	Histone H1.2	HIST1H1C	92	92	0
Q15046;Q6ZTI3	Lysine--tRNA ligase	KARS	92	92	0
H0Y2W2		ATAD3A	92	92	0
Q96CM8;E9PF16;B4DTB9	Acyl-CoA synthetase family member 2, mitochondrial	ACSF2	92	92	0
G3V1C3;Q9BZZ5;B4DDR3;H0YER7	Apoptosis inhibitor 5	API5	92	92	0
X5DNM4;V9HW62;Q04760	Lactoylglutathione lyase	GLO1;HEL-S-74	92	92	0
B7Z4U9;Q59HE3;B2RCJ7;B7Z5T6;A8K8C4;Q15786			92	92	0
A0A024R1K7;Q04917;Q9H4N8;A2IDB2	14-3-3 protein eta	YWHAH	92	92	0
A0A024R9C1;P11940;A0A087WTT1;E7EQV3;B4DZW4;E7ERJ7;B4DQX0;B3KT93;A0A024R9E2;H0YAR2;Q5VX58;Q3ZCS4;Q9H361	Polyadenylate-binding protein;Polyadenylate-binding protein 1;Polyadenylate-binding protein 3	PABPC1;PABPC3	92	92	0
E7EWP0;D3DNS1;B2R9L0;H0Y886;O43674;Q05D62	NADH dehydrogenase [ubiquinone] 1 beta subcomplex subunit 5, mitochondrial	NDUFB5	92	92	0
I6L975;Q3SXM5	Inactive hydroxysteroid dehydrogenase-like protein 1	HSDL1	92	92	0
A0A090N7T9;Q12765;A0A024RA21;B4DH22;C9K052	Secernin-1	SCRN1	92	92	0
Q53HT6;Q53G72;P51572;C9JSP1;C9JQ75;C9J0M4;C9JMD7	B-cell receptor-associated protein 31	BCAP31	92	92	0
O95425	Supervillin	SVIL	92	92	0
P54727;B4DEA3;Q53F10;B7ZA74;B7Z4W4;Q5W0S5	UV excision repair protein RAD23 homolog B	RAD23B	92	92	0
Q567R6;A4D1U3;Q04837;A0A0G2JLD8;E7EUY5;B7Z268;C9K0U8	Single-stranded DNA-binding protein;Single-stranded DNA-binding protein, mitochondrial	SSBP1	92	92	0
Q1HBJ4;P28482;B4DHN0;Q499G7	Mitogen-activated protein kinase;Mitogen-activated protein kinase 1	MAPK1	92	92	0
O75367;B4DJC3;Q59FH0	Core histone macro-H2A.1;Histone H2A	H2AFY	92	92	0
A0A0K0K1K7;O95336;M0R261	6-phosphogluconolactonase	PGLS	92	92	0
A5YM53;L7RXH0;P06756	Integrin alpha-V;Integrin alpha-V heavy chain;Integrin alpha-V light chain	ITGAV	92	92	0
A0A024R4M0;P46781;B5MCT8;C9JM19;B7Z732;A5D904	40S ribosomal protein S9	RPS9	92	92	0
P35580	Myosin-10	MYH10	92	92	0
Q53HJ4;B2R7C5;A0A0S2Z4T1;P25205;A0A0S2Z492;Q8NHX6;B4DUQ9;J3KQ69;B4DS46	DNA helicase;DNA replication licensing factor MCM3	MCM3;HCC5	92	92	0
O75147;A6NN50	Obscurin-like protein 1	OBSL1	92	92	0
P12270	Nucleoprotein TPR	TPR	92	92	0
A0A024R9U3;Q9NX40;D6RG39;D6RIT9;D6RDK6;D6RBN5	OCIA domain-containing protein 1	OCIAD1	92	92	0
Q53GW1;Q8WVM8;B7Z738;B7Z5N7	Sec1 family domain-containing protein 1	SCFD1	92	92	0
P54136;B4DXW6	Arginine--tRNA ligase, cytoplasmic	RARS	92	92	0
B3KTM6;A2RUM7;P46777;Q59GX9	60S ribosomal protein L5	RPL5	92	92	0
Q5SRT3;Q53FB0;O00299	Chloride intracellular channel protein;Chloride intracellular channel protein 1	CLIC1	92	92	0
E9PL57;F8VSA6;E9PS38;S4R3E9;Q15843	NEDD8	NEDD8-MDP1;NEDD8	92	92	0
B7Z6X8;E9PGP6;A0A090N8Q6;Q9UGJ0	5-AMP-activated protein kinase subunit gamma-2	PRKAG2	92	92	0
A0A024RAM0;Q92973	Transportin-1	TNPO1	92	92	0
P30050;Q59FI9	60S ribosomal protein L12	RPL12	92	92	0
B4DUJ6	Enolase		92	92	0
Q53XL8;Q53HB3;P62191	26S protease regulatory subunit 4	PSMC1	92	92	0
Q8WVC2;Q6FGH5;P63220;Q9BYK1	40S ribosomal protein S21	RPS21	92	92	0
B4DV79;A4D210;A0A024R821;P55884;B4DXN6;Q96G38;Q86UM1	Eukaryotic translation initiation factor 3 subunit B	EIF3B;EIF3S9	92	92	0
Q59EK6;Q9BV61;A0A140VJY2;Q12931;Q53G55;Q53FS6;Q8N9Z3;K0A7K7;Q5CAQ4;I3L0K7	Heat shock protein 75 kDa, mitochondrial	TRAP1	92	92	0
G3V1L9;Q07157;A9CQZ8;G5E9E7;A0A087X0K9;Q6MZU1;Q68DX9	Tight junction protein ZO-1	TJP1;DKFZp686A1195;DKFZp686M05161	92	92	0
P35052;H7C410;A0A024R4D5;H7C024;Q59GI7	Glypican-1;Secreted glypican-1	GPC1	92	92	0
A0A0S2Z693;Q96RQ3;E9PHF7;Q68D27;F5GYT8;E9PG35;B4DH16;G5E9X5;B4DHW5	Methylcrotonoyl-CoA carboxylase subunit alpha, mitochondrial	MCCC1;DKFZp686B20267	92	92	0
A0A024RC42;P19022	Cadherin-2	CDH2	92	92	0
A0A024R652;P11586;F5H2F4;B7Z809	C-1-tetrahydrofolate synthase, cytoplasmic;Methylenetetrahydrofolate dehydrogenase;Methenyltetrahydrofolate cyclohydrolase;Formyltetrahydrofolate synthetase;C-1-tetrahydrofolate synthase, cytoplasmic, N-terminally processed	MTHFD1	92	92	0
A3RJH1;Q92499;F1T0B3;A0A087X2G1;B4DP70	ATP-dependent RNA helicase DDX1	DDX1	92	92	0
O00159;F5H6E2;B7Z3E5	Unconventional myosin-Ic	MYO1C	92	92	0
A0A024R5M9;Q4LE64;Q14980;A0A087WY61;A0A024R5G4;Q59HB8;Q7Z757	Nuclear mitotic apparatus protein 1	NUMA1;NUMA1 variant protein	92	92	0
V9HW41;P61088;F8VSD4;F8VV71;F8VZ29	Ubiquitin-conjugating enzyme E2 N	HEL-S-71;UBE2N	92	92	0
B2R8R5;Q13263	Transcription intermediary factor 1-beta	TRIM28	92	92	0
J3KNV4;Q4LE35;Q13683;B3KMS6	Integrin alpha-7;Integrin alpha-7 heavy chain;Integrin alpha-7 light chain;Integrin alpha-7 70 kDa form	ITGA7;ITGA7 variant protein	92	92	0
A0A0A0MRA8;Q9Y2J2;A0A0A0MSA4;A0A1B0GTF8;B7Z8M8	Band 4.1-like protein 3;Band 4.1-like protein 3, N-terminally processed	EPB41L3	92	92	0
P48147	Prolyl endopeptidase	PREP	92	92	0
C9JZR2;O60716;Q68DU0;Q96FS1;Q7KZJ3;A0A024R4Z0;A0A024R4Y7	Catenin delta-1	CTNND1;DKFZp781O2021	92	92	0
G3V325;B4DJ38;C9JJT5		ATP5J2-PTCD1	92	92	0
A0A140VJF4;P53004	Biliverdin reductase A	BLVRA	92	92	0
P68366	Tubulin alpha-4A chain	TUBA4A	92	92	0
A0A024RAQ9;Q59FG9;P13611;E9PF17;A0A024RAP3;A0A024RAL1;D6RGZ6	Versican core protein	CSPG2;VCAN	92	92	0
P42224;J3KPM9	Signal transducer and activator of transcription 1-alpha/beta;Signal transducer and activator of transcription	STAT1	92	92	0
A0A087WTP3;Q92945;B4DV73;M0R0I5	Far upstream element-binding protein 2	KHSRP	92	92	0
Q9BQ69	O-acetyl-ADP-ribose deacetylase MACROD1	MACROD1	92	92	0
Q12955;Q59G01	Ankyrin-3	ANK3	92	92	0
A0A140VK07;Q6DEN2;Q14195;Q8IXW6	Dihydropyrimidinase-related protein 3	DPYSL3	92	92	0
P48449;B2R694;A0A0G2JQD0	Lanosterol synthase;Terpene cyclase/mutase family member	LSS	92	92	0
V9HWJ0;B4DJ30;Q14697	Neutral alpha-glucosidase AB	HEL-S-164nA;GANAB	92	92	0
Q9BX66;B4DTX5;B4E264;A0A0U1RQI5	Sorbin and SH3 domain-containing protein 1	SORBS1	92	92	0
E9PKC0;Q6IQ23;H0YDE2;A0A1B0GUN0	Pleckstrin homology domain-containing family A member 7	PLEKHA7	92	92	0
C9J0K6;P30626;B4DHQ6	Sorcin	SRI	92	92	0
P07384;A0A024R5A3;A0A024R580;B2RDI5;B4DWH5	Calpain-1 catalytic subunit	CAPN1	92	92	0
Q9H845;Q9H9W4;H0Y8Z9;Q9BUX5;Q59FN3	Acyl-CoA dehydrogenase family member 9, mitochondrial	ACAD9	92	92	0
B3KX19;Q6IBM8;Q15029;Q8IXJ3;A8KAP3;B4DZB1;B3KWY2	116 kDa U5 small nuclear ribonucleoprotein component	U5-116KD;EFTUD2;SNRP116	92	92	0
I4AY87;P14174	Macrophage migration inhibitory factor	MIF	92	92	0
H0Y4R1;P12268;B7Z1G4;Q6QE17	Inosine-5-monophosphate dehydrogenase 2	IMPDH2	92	92	0
Q16778;A0A024RCJ2;P06899	Histone H2B type 2-E;Histone H2B;Histone H2B type 1-J	HIST2H2BE;HIST1H2BJ	92	92	0
Q53XM7;O95292	Vesicle-associated membrane protein-associated protein B/C	VAPB	92	92	0
B4DM33;Q15691;A2VCR0	Microtubule-associated protein RP/EB family member 1	MAPRE1	92	92	0
V9HWI1;P30043;M0R192;M0QZL1	Flavin reductase (NADPH)	HEL-S-10;BLVRB	92	92	0
Q6IAT9;P28072	Proteasome subunit beta type;Proteasome subunit beta type-6	PSMB6	92	92	0
Q9Y3I0	tRNA-splicing ligase RtcB homolog	RTCB	92	92	0
A0A024RDG6;Q14108	Lysosome membrane protein 2	SCARB2	92	92	0
G8JLB6;P31943;E9PCY7;D6RIT2;D6RIU0;D6RBM0;E7EQJ0;D6RAM1;D6R9T0;D6RFM3;D6RDU3;D6RJ04;D6RIH9	Heterogeneous nuclear ribonucleoprotein H;Heterogeneous nuclear ribonucleoprotein H, N-terminally processed	HNRNPH1	92	92	0
V9HW53;O95865;A0A140T971;Q5SSV3;Q5SRR8;H0Y7N1	N(G),N(G)-dimethylarginine dimethylaminohydrolase 2	HEL-S-277;DDAH2	92	92	0
P16949;B5BU83;A2A2D0;Q96CE4;A0A140VJW2	Stathmin	STMN1	92	92	0
A8KAH7;A0A0S2Z472;A0A024R2W3;P13861	cAMP-dependent protein kinase type II-alpha regulatory subunit	PRKAR2A	92	92	0
Q9Y6M9;E9PH64	NADH dehydrogenase [ubiquinone] 1 beta subcomplex subunit 9	NDUFB9	92	92	0
Q9NZI8;D3DTW3	Insulin-like growth factor 2 mRNA-binding protein 1	IGF2BP1	92	92	0
B3KUN1;P67775;Q6I9T8	Serine/threonine-protein phosphatase;Serine/threonine-protein phosphatase 2A catalytic subunit alpha isoform	PPP2CA	92	92	0
Q9BXX0	EMILIN-2	EMILIN2	92	92	0
A0A0S2Z410;Q99714;Q5H928;A0A0S2Z434	3-hydroxyacyl-CoA dehydrogenase type-2	HSD17B10	92	92	0
R4GNH3;A8K781;A0A140VK42;P17980;E9PM69;E9PKD5;E9PN50	26S protease regulatory subunit 6A	PSMC3	92	92	0
A2TDB8;P50461	Cysteine and glycine-rich protein 3	CSRP3	92	92	0
A0A0C4DFX3;Q9Y6C2	EMILIN-1	EMILIN1	92	92	0
Q16531;F5GY55;B7Z2A1;B4DSA8;B4DZP5	DNA damage-binding protein 1	DDB1	92	92	0
Q6FII1;Q9Y2Q3;Q2NLC8;E9PFN5;C9JNT3	Glutathione S-transferase kappa 1	LOC51064;GSTK1	92	92	0
A0A140VJT8;P13489;A0A024RC87	Ribonuclease inhibitor	RNH1	92	92	0
P62249;M0R210;M0R3H0;M0R1M5;A0A087WZ27;Q6IPX4	40S ribosomal protein S16	RPS16;ZNF90	92	92	0
V9HW04;P62140;B7ZB67;B4DJ75;E7ETD8	Serine/threonine-protein phosphatase;Serine/threonine-protein phosphatase PP1-beta catalytic subunit	HEL-S-80p;PPP1CB	92	92	0
B3KNN7;Q8N9M2;O43242;B4DEB0;Q96N86;B4DV84;Q6IBN0;B4DPM7	26S proteasome non-ATPase regulatory subunit 3	PSMD3	92	92	0
A0A087WYR3;Q68E05;Q6FGS1;O43399;Q53GA0;A0A087WZ51;Q5J908	Tumor protein D54	TPD52L2;DKFZp686A1765	92	92	0
B0YIW5;P48444;Q6MZV5;B0YIW6	Coatomer subunit delta	ARCN1;DKFZp686M09245	92	92	0
A8K7B7;P30153;B4DDF7;A8K3H8;B4DE69;B4DQY1;Q8NB89;B3KQV6;C9J9C1	Serine/threonine-protein phosphatase 2A 65 kDa regulatory subunit A alpha isoform	PPP2R1A	92	92	0
A0A024R3T8;P09874;B4E0E1;B2R5W3	Poly [ADP-ribose] polymerase 1	PARP1	92	92	0
Q07021;A8K651;I3L3Q7;I3L3B0	Complement component 1 Q subcomponent-binding protein, mitochondrial	C1QBP	92	92	0
A0A140VK27;P09960;B4DVZ8;Q59ES1	Leukotriene A-4 hydrolase;Leukotriene A(4) hydrolase	LTA4H	92	92	0
Q9UI09;Q53HG1;F8VRD8	NADH dehydrogenase [ubiquinone] 1 alpha subcomplex subunit 12	NDUFA12	92	92	0
O94826;B4DZ87;B3KQK5;B3KQK0	Mitochondrial import receptor subunit TOM70	TOMM70A	92	92	0
G8JLD5;O00429;D3DUW7;D3DUW6;B4DYR6;D3DUW5;Q32Q67	Dynamin-1-like protein	DNM1L	92	92	0
Q53GN4;Q59ER5;Q53H17		WDR1	92	92	0
Q8WUM4;Q4W4Y1;B4DHD2;B7Z5C1	Programmed cell death 6-interacting protein	PDCD6IP;DRIP4	92	92	0
P51648;J3QRD1;Q59H65;Q68D64;I3L1M4	Fatty aldehyde dehydrogenase	ALDH3A2;DKFZp686E23276	92	92	0
P35556;A0A087WYV8;D6RJI3	Fibrillin-2	FBN2	92	92	0
Q86SZ7;Q2TNB3;A0A087X1Z3;Q9UL46;H0YM70;Q6FHK9	Proteasome activator complex subunit 2	PSME2	92	92	0
Q9Y4G6;A0A1C7CYV7;A0A1B0GVU7;G1UI21;H0YMT1	Talin-2	TLN2	92	92	0
Q14165;F5H1S8;H0YG07	Malectin	MLEC	92	92	0
Q53FV3;B3KM48;A0A0S2Z5H7;Q9BT78;D6RFN0;D6RAX7;D6RD63	COP9 signalosome complex subunit 4	COPS4	92	92	0
Q59EI3;B2R8A9;A0A024R0K3;Q6ZSA3;F5H5P2;P12694;F5GXU9;Q658P7	2-oxoisovalerate dehydrogenase subunit alpha, mitochondrial	BCKDHA;DKFZp313C0640	92	92	0
A0A024R3S3;Q8NI60;B4DVB7;A1L377;Q5T7A2;B4DED1;B4DN23	Atypical kinase ADCK3, mitochondrial	CABC1;ADCK3	92	92	0
B5BUI8;P51452	Dual specificity protein phosphatase 3	DUSP3	92	92	0
Q6P2Q9;B4DK16	Pre-mRNA-processing-splicing factor 8	PRPF8	92	92	0
Q15717;M0QZR9	ELAV-like protein 1	ELAVL1	92	92	0
B4E0S6;O43143	Pre-mRNA-splicing factor ATP-dependent RNA helicase DHX15	DHX15	92	92	0
E7EX59;E9PDR0;Q59GV0;P05166;E7EUY3;E7ETT1;C9JQS9;A0A1B2JLU8;E7ETT4;B7Z8A8;E9PEC3;F8WBI9;B7Z7U9;Q9HBR7	Propionyl-CoA carboxylase beta chain, mitochondrial	PCCB	92	92	0
A0A140VK13;A0A1B0GVF3;P23786;A0A1B0GTB8;A0A1B0GWC0;A0A1B0GV75	Carnitine O-palmitoyltransferase 2, mitochondrial	CPT2	92	92	0
V9HWF5;A8K486;P62937;B2RE56;B4DM82;Q71V99;F8WE65;C9J5S7	Peptidyl-prolyl cis-trans isomerase;Peptidyl-prolyl cis-trans isomerase A;Peptidyl-prolyl cis-trans isomerase A, N-terminally processed	HEL-S-69p;PPIA	92	92	0
B4DVE1;A0A0S2Z3Y1;Q08380;B3KP88;B4DDG4;B4DWA8;B4DI70;K7EP36	Galectin-3-binding protein	LGALS3BP	92	92	0
Q9Y490	Talin-1	TLN1	92	92	0
O95817;Q53GY1;C9JFK9	BAG family molecular chaperone regulator 3	BAG3	92	92	0
Q6NUK1;B7ZB41;B4E290	Calcium-binding mitochondrial carrier protein SCaMC-1	SLC25A24	92	92	0
D6R938;A0A024RDK3;Q13557;E9PBG7;E9PF82;B7Z2B0;Q4G1A8	Calcium/calmodulin-dependent protein kinase type II subunit delta	CAMK2D	92	92	0
P60866;E5RJX2;E5RIP1	40S ribosomal protein S20	RPS20	92	92	0
B3KRY3;A0A024RDY3;P11279	Lysosome-associated membrane glycoprotein 1	LAMP1	92	92	0
A0A0S2Z4R1;P54577;A0A0C4DGZ5	Tyrosine--tRNA ligase, cytoplasmic;Tyrosine--tRNA ligase, cytoplasmic, N-terminally processed;Tyrosine--tRNA ligase	YARS	92	92	0
A0A0A0MS41;B4DRS6;Q9BWM7;S4R3N9	Sideroflexin;Sideroflexin-3	SFXN3	92	92	0
Q53GE2;Q53GC7;A4D0V4;P47755;F8W9N7;A0A0D9SET8;C9JUG7;B4DE01	F-actin-capping protein subunit alpha-2	CAPZA2	92	92	0
V9HW58;Q53H88;Q13561;B3KTX4;A8K8J9;F8W1I6;H0YI98;F8VW18	Dynactin subunit 2	HEL-S-77;DCTN2	92	92	0
A0A0A0MS24;O60237;A0A024R998;A0A024R9B2	Protein phosphatase 1 regulatory subunit 12B;Protein phosphatase 1 regulatory subunit	PPP1R12B	92	92	0
O75643;A4FU77	U5 small nuclear ribonucleoprotein 200 kDa helicase	SNRNP200	92	92	0
Q6YN16;B2R923;A0A024R159;B4E136	Hydroxysteroid dehydrogenase-like protein 2	HSDL2	92	92	0
V9HW37;P48643;B4DZT5;E7ENZ3;Q9BU08;B7ZAR1;B4DDU6;B4DXI1;E9PCA1;B4DE30;B4DYC8;B4DX08;Q96GI1	T-complex protein 1 subunit epsilon	HEL-S-69;CCT5	92	92	0
E9KL42;Q86TX2;B4DV16;A1L172;G3V4F2;B7ZMC1	Acyl-coenzyme A thioesterase 1	ACOT1	92	92	0
Q59EF6;B2RCM3;P17655;B4E1R7;B4DN77	Calpain-2 catalytic subunit	CAPN2	92	92	0
P42677;Q5T4L4	40S ribosomal protein S27	RPS27	92	92	0
P51553;D3DWV9;E9PF84;G5E9Q7;E7EQB8;O15384	Isocitrate dehydrogenase [NAD] subunit gamma, mitochondrial;Isocitrate dehydrogenase [NAD] subunit, mitochondrial	IDH3G;hCG_2004980	92	92	0
Q6NTA2;P14866;B2R959;M0QXS5	Heterogeneous nuclear ribonucleoprotein L	HNRNPL	92	92	0
E5KLM1;E5KLL9;E5KLM2;E5KLM0			92	92	0
Q5RKT7;B2RDW1;P62979;J3QS39;J3QTR3;F5H6Q2;Q3MIH3;F5GYU3;F5H2Z3;F5H265;Q5UGI3;B4DV12;F5H388;F5H747;F5GXK7;J3QKN0;Q5U5U6;Q5PY61;Q9UFQ0;Q96C32;Q96MH4;L8B4I8;L8B196;Q96H31;L8B4R0;A8K674;L8B4Z6;L8B4M0;L8B4J3;Q66K58;Q59EM9;P62987;P0CG47;P0CG48;Q8WYN9;M0R1V7;Q49A90;M0R1M6;M0R2S1	Ubiquitin-40S ribosomal protein S27a;Ubiquitin;40S ribosomal protein S27a;Ubiquitin-60S ribosomal protein L40;Ubiquitin;60S ribosomal protein L40;Polyubiquitin-B;Ubiquitin;Polyubiquitin-C;Ubiquitin	RPS27A;HEL112;UBB;UBC;UBA52;DKFZp434K0435;UbC	92	92	0
A0A140VK49;Q7KZF4;B2R5U1;Q59FF0;B4E299;B3KU67	Staphylococcal nuclease domain-containing protein 1	SND1	92	92	0
P05165;B2RDE0;A0A1B0GU58;A0A1B0GWI4;A0A1B0GUX9;A0A1B0GWA1	Propionyl-CoA carboxylase alpha chain, mitochondrial	PCCA	92	92	0
Q96QK1;Q53FR4;Q5HYM2	Vacuolar protein sorting-associated protein 35	VPS35;DKFZp686O2462	92	92	0
Q63ZY3	KN motif and ankyrin repeat domain-containing protein 2	KANK2	92	92	0
Q53HV2;Q99832;Q6IBT3;B7Z7I4;B7Z1C9	T-complex protein 1 subunit eta	CCT7	92	92	0
A0A140VJW5;P14868;D3DP78;Q53T60	Aspartate--tRNA ligase, cytoplasmic	DARS	92	92	0
O60664;A0A140VJN8;K7ERZ3;K7EL96	Perilipin-3	PLIN3	92	92	0
E9PC15;B4E2Z8;A4D1U5;Q53H12;E9PG39;B4DR72	Acylglycerol kinase, mitochondrial	AGK;FLJ10842	92	92	0
O00231;B4DTS5	26S proteasome non-ATPase regulatory subunit 11	PSMD11	92	92	0
A0A024R442;Q53SB6;E7ETB3;B7Z7F0;Q9ULA0;Q9BSS9;E7EMB6;A0A024R443;Q9NV55;Q9HAC6;B9ZVU2;F8WAN0;B7Z822;E7EPX3;C9JBE1	Aspartyl aminopeptidase	DNPEP	92	92	0
P32418;E7EV41	Sodium/calcium exchanger 1	SLC8A1	92	92	0
Q6FH91;P63316	Troponin C, slow skeletal and cardiac muscles	TNNC1	92	92	0
Q68DQ4;B2R5T5;P10644;K7EPB2	cAMP-dependent protein kinase type I-alpha regulatory subunit;cAMP-dependent protein kinase type I-alpha regulatory subunit, N-terminally processed	DKFZp779L0468;PRKAR1A	92	92	0
A0A024R201;Q9Y6E3;Q9UNM6;Q53GN6;B2RBM7;A0A087WUL9;B4DJ66;J3KNQ3;E9PL38;H0YD73	26S proteasome non-ATPase regulatory subunit 13	PSMD13	92	92	0
Q8WX93;B2RTX2	Palladin	PALLD	92	92	0
A0A0C4DGS0;P56556;R4GN43	NADH dehydrogenase [ubiquinone] 1 alpha subcomplex subunit 6	NDUFA6	92	92	0
P09455;A0A0A0MTB9;H0YAK8;A0A0A0MQT0	Retinol-binding protein 1	RBP1	92	92	0
P28289	Tropomodulin-1	TMOD1	92	92	0
J3KNF8		CYB5B	92	92	0
A0A0C4DGS1;A0A024RAD5;P39656	Dolichyl-diphosphooligosaccharide--protein glycosyltransferase 48 kDa subunit	DDOST	92	92	0
A0A024R6I3;Q53GF9;P49755;B4DZH3	Transmembrane emp24 domain-containing protein 10	TMED10	92	92	0
A0A024R0E5;P52907;A8K0T9	F-actin-capping protein subunit alpha-1	CAPZA1	92	92	0
O75533;Q7Z497	Splicing factor 3B subunit 1	SF3B1	92	92	0
B3KVN0;Q0P512;Q59GX2;P11166;B4DKW1;B4DDR6	Solute carrier family 2, facilitated glucose transporter member 1	SLC2A1	92	92	0
A4D1N4;C9JRZ6;Q9NX63;F8WAR4;B7Z1X9	MICOS complex subunit MIC19	CHCHD3	92	92	0
A0A0C4DFV9;B2RCX0;A0A024R895;Q5VXV3;Q01105;A0A087X027;P0DME0	Protein SET;Protein SETSIP	SET;SETSIP	92	92	0
A0A024R325;Q96I99;Q3ZCW5;E9PDQ8	Succinyl-CoA ligase subunit beta;Succinyl-CoA ligase [GDP-forming] subunit beta, mitochondrial	SUCLG2	92	92	0
B2R6D0;Q99460;A0A087WW66;Q05CW6;Q05BX4	26S proteasome non-ATPase regulatory subunit 1	PSMD1	92	92	0
A0A024RBH2;Q07065;B3KVX6;Q8TB01;Q6NWZ1	Cytoskeleton-associated protein 4	CKAP4	92	92	0
P07996;A0A024R9Q1;CON__Q28194	Thrombospondin-1	THBS1	92	92	0
B2R6X6;A0A024QZS4;P30405	Peptidyl-prolyl cis-trans isomerase;Peptidyl-prolyl cis-trans isomerase F, mitochondrial	PPIF	92	92	0
K7EJE8;K7EKE6;B3KU28;Q2VPA0;B3KXS5;E5KMI6;P36776;B4DPX0	Lon protease homolog, mitochondrial;Lon protease homolog	LONP1	92	92	0
Q59GB4;A0A1C7CYX9;Q16555	Dihydropyrimidinase-related protein 2	DPYSL2	92	92	0
Q32Q12;Q6FHN3;J3KPD9;P22392;E7ERL0	Nucleoside diphosphate kinase;Nucleoside diphosphate kinase B	NME1-NME2;NME2;NME1	92	92	0
A0A024R2U9;C9JIF9;P13798;H7C393	Acylamino-acid-releasing enzyme	APEH	92	92	0
A0A024QZN7;Q9NZ45	CDGSH iron-sulfur domain-containing protein 1	C10orf70;CISD1	92	92	0
Q9UBQ7;Q5M7Z5;U3KQ56	Glyoxylate reductase/hydroxypyruvate reductase	GRHPR	92	92	0
P07814	Bifunctional glutamate/proline--tRNA ligase;Glutamate--tRNA ligase;Proline--tRNA ligase	EPRS	92	92	0
A0A0S2Z4Z0;Q96PK6;Q59GV2	RNA-binding protein 14	RBM14	92	92	0
V9HWH7;P31939;B2R7P8	Bifunctional purine biosynthesis protein PURH;Phosphoribosylaminoimidazolecarboxamide formyltransferase;IMP cyclohydrolase	HEL-S-70p;ATIC	92	92	0
A0A024R9B7;P09669	Cytochrome c oxidase subunit 6C	COX6C	92	92	0
P52209;B4E2U0;B4DL86;K7EM49;A9Z1X1;B4DV68	6-phosphogluconate dehydrogenase, decarboxylating	PGD	92	92	0
B2R657;B4DT77;B4DWU2;B4DHY4;Q53HM8;P20073;B2R7L2	Annexin;Annexin A7	ANXA7	92	92	0
A0A0A6YYJ8;B3KRR1		LUC7L2	92	92	0
B2RAH5;O14974;A0A024RBF1;F8VZN8	Protein phosphatase 1 regulatory subunit;Protein phosphatase 1 regulatory subunit 12A	PPP1R12A	92	92	0
Q9P0J0;B4DEZ3;K7EJE1;E7ENQ6;B4DQP1	NADH dehydrogenase [ubiquinone] 1 alpha subcomplex subunit 13	NDUFA13	92	92	0
Q8TBI1;P27338;B7Z242	Amine oxidase [flavin-containing] B	MAOB	92	92	0
O14949;B7Z4A1	Cytochrome b-c1 complex subunit 8	UQCRQ	92	92	0
A0A024R1Z6;Q99536;B3KUF8	Synaptic vesicle membrane protein VAT-1 homolog	VAT1	92	92	0
P39023;Q8TBW1;Q96QL0;B3KS36;Q9NY85;G5E9G0;Q49AJ9;Q9BT63;B5MCW2;H7C422;H7C3M2	60S ribosomal protein L3	RPL3;rpl3	92	92	0
B4E0U6;A0A140VKA6;P50502;Q1XBU6;B7ZA40;Q0IJ56;H7C3I1;Q8NFI4;Q3KNR6;Q8IZP2;F6VDH7	Hsc70-interacting protein;Putative protein FAM10A5;Putative protein FAM10A4	ST13;ST13P5;ST13P4	92	92	0
B4DJ51;B2RDW0;H0Y7A7;P62158;Q9BRL5;E7ETZ0;E7EMB3;A8K1M2;Q96HY3;G3V361	Calmodulin	CALM3;CALM2;CALM1	92	92	0
P53618;E9PP73	Coatomer subunit beta	COPB1	92	92	0
A0A024R7C7;Q12906;F4ZW64;A8K590;F4ZW65;F4ZW66;B4DFG4;Q59GP7	Interleukin enhancer-binding factor 3	ILF3	92	92	0
F6TLX2;Q9Y3E8;B4DX01;B7Z403;A8K8F0;Q9HC38;B3KV49;I3L3Q4	Glyoxalase domain-containing protein 4	GLOD4	92	92	0
L0R512		NCAM2	92	92	0
Q53FI7;B7Z6U8;B7Z5V0;B7Z9A1;B7Z4B7;Q5JXI8;B7Z5T3;Q13642;Q5JXH8;Q5JXH7;Q5JXI3;A0A0D9SFZ9;Q5JXI2;A0A0D9SFI6;A0A0D9SFB0;Q5JXH9;B3KRI9	Four and a half LIM domains protein 1	FHL1	92	92	0
C9J9K3;A0A024R2P0;A0A0C4DG17;P08865;Q96RS2;A0A024R7P5;F8WD59	40S ribosomal protein SA	RPSA;LOC388524	92	92	0
P35659;B4DNW3;B4DFG0;D6RDA2	Protein DEK	DEK	92	92	0
O75396	Vesicle-trafficking protein SEC22b	SEC22B	92	92	0
Q0D2I8;P28161;E9PHN7;A8HT81;E9PHN6;F6XZQ7;E9PLF1	Glutathione S-transferase Mu 2	GSTM2	92	92	0
O43175;V9HW79;Q5SZU1;B3KSC3;Q9UMY2	D-3-phosphoglycerate dehydrogenase	PHGDH;HEL-S-113;PGDH3	92	92	0
Q5VZU9;P29144;B7Z920	Tripeptidyl-peptidase 2	TPP2	92	92	0
Q96PU8;H0YG47	Protein quaking	QKI	92	92	0
Q13200;Q59EG8;B4DM22;Q9NSM5;Q13041	26S proteasome non-ATPase regulatory subunit 2	PSMD2;DKFZp564A2282	92	92	0
Q969Z3	Mitochondrial amidoxime reducing component 2	2018-03-02	92	92	0
P51970;B7Z768	NADH dehydrogenase [ubiquinone] 1 alpha subcomplex subunit 8	NDUFA8	92	92	0
P62906;Q1JQ76;A0A024RCW3	60S ribosomal protein L10a;Ribosomal protein	RPL10A	92	92	0
A0A024R8W0;P38919	Eukaryotic initiation factor 4A-III;Eukaryotic initiation factor 4A-III, N-terminally processed	DDX48;EIF4A3	92	92	0
A0A024R4X0;P00387;Q6ZVI6	NADH-cytochrome b5 reductase;NADH-cytochrome b5 reductase 3;NADH-cytochrome b5 reductase 3 membrane-bound form;NADH-cytochrome b5 reductase 3 soluble form	CYB5R3	92	92	0
D6W5Y5;K7ENX8;K7ELV6;K7EJV5;Q6ZR81;K7ELT6;B4E2A3;K7EJV1;K7EMY9;K7EPM4;Q53XX5;K7ER40;K7EQR7;Q14011	Cold-inducible RNA-binding protein	CIRBP	92	92	0
A0A140VK29;Q9HCC0;D6RDF7;A0A0S2Z5R4	Methylcrotonoyl-CoA carboxylase beta chain, mitochondrial	MCCC2	92	92	0
B3KTJ9;Q8N163;H0YB24;G3V119;E2PSM9	Cell cycle and apoptosis regulator protein 2	CCAR2	92	92	0
Q9UMS4	Pre-mRNA-processing factor 19	PRPF19	92	92	0
B3KX11;P49368;Q59H77;Q2TU64;B4DUR8	T-complex protein 1 subunit gamma	CCT3	92	92	0
A0A024RDR0;P09429;Q5T7C4;B7Z965;Q59GW1;B3KQ05	High mobility group protein B1	HMGB1	92	92	0
Q09666	Neuroblast differentiation-associated protein AHNAK	AHNAK	92	92	0
A8KAH6;Q16082	Heat shock protein beta-2	HSPB2	92	92	0
B4DL49;A0A024R374;P07858;A8K2H4;B4DMY4;B3KUJ8;Q6LAF9	Cathepsin B;Cathepsin B light chain;Cathepsin B heavy chain	CTSB	92	92	0
A0A024R745;Q16718;A0A087X1G1;H7BYD0;F8WAS3;C9IZN5	NADH dehydrogenase [ubiquinone] 1 alpha subcomplex subunit 5	NDUFA5	92	92	0
O94905;E5RHW4;E5RJ09	Erlin-2	ERLIN2	92	92	0
X5D8S1;H3BRN4;P80404;H3BNQ7;B7Z1V4	4-aminobutyrate aminotransferase, mitochondrial	ABAT	92	92	0
A0A024QZF2;P10301	Ras-related protein R-Ras	RRAS	92	92	0
A0A024RCA7;P05387	60S acidic ribosomal protein P2	RPLP2	92	92	0
P35221;B4E2G8;G3XAM7;B4DU00;B4DKT9;B3KSR8	Catenin alpha-1	CTNNA1	92	92	0
Q9P2B2	Prostaglandin F2 receptor negative regulator	PTGFRN	92	92	0
V9HW72;A8K690;P31948	Stress-induced-phosphoprotein 1	HEL-S-94n;STIP1	92	92	0
V9HW29;P33176;D3DRX6	Kinesin-like protein;Kinesin-1 heavy chain	HEL-S-61;KIF5B	92	92	0
P82909	28S ribosomal protein S36, mitochondrial	MRPS36	92	92	0
D6RGI3;D6RER5;Q9NVA2;D6RDU5;H0Y961	Septin-11	2018-09-11	92	92	0
A6NGQ3;Q5VST9	Obscurin	OBSCN	92	92	0
Q53FJ5;A0A024QZQ2;C9JIZ6;Q59EN5;P07602;B4DEK5;B4DRB7;Q5BJH1	Prosaposin;Saposin-A;Saposin-B-Val;Saposin-B;Saposin-C;Saposin-D	PSAP	92	92	0
P10909;H0YLK8;E7ERK6;E7ETB4;H0YC35	Clusterin;Clusterin beta chain;Clusterin alpha chain;Clusterin	CLU	92	92	0
V9HWH2;V9HW77;P12277;A0A0S2Z471;B4DP56;G3V4N7	Creatine kinase B-type	HEL-S-29;HEL-211;CKB	92	92	0
Q86TY5;A0A024R693;Q59FR8;P17931;Q6FGL0;G3V3R6	Galectin;Galectin-3	hCG_22119;LGALS3	92	92	0
A8K8U1;Q86VP6;A0A0C4DGH5	Cullin-associated NEDD8-dissociated protein 1	CAND1	92	92	0
Q9BYV6	Tripartite motif-containing protein 55	TRIM55	92	92	0
Q5VTU8;P56381	ATP synthase subunit epsilon-like protein, mitochondrial;ATP synthase subunit epsilon, mitochondrial	ATP5EP2;ATP5E	92	92	0
M0QZ43;Q2M1I0;B5TMG5;P23327	Sarcoplasmic reticulum histidine-rich calcium-binding protein	HRC	92	92	0
B4DV28;Q96KP4;A0A024R382;B4DPF1	Cytosolic non-specific dipeptidase	CNDP2	92	92	0
E9PMT2;F8WD26;F8J2B5;J3KP06;Q8WWI1;A0A0A0MTE2;H0Y424	LIM domain only protein 7	LMO7	92	92	0
A0A024R1N4;P12956;B1AHC9;B2RDN9;B4DE32;B4E356	X-ray repair cross-complementing protein 6	XRCC6	92	92	0
Q6NZI2;B4DPZ5;B4DNU9;B3KRY5	Polymerase I and transcript release factor	PTRF	92	92	0
D3YTB1;A0A024R2G7;F8W727;P62910	60S ribosomal protein L32	RPL32	92	92	0
Q702N8	Xin actin-binding repeat-containing protein 1	XIRP1	92	92	0
A0A0K0K1K4;O14818;Q05DH1;H0UI83;H0Y586	Proteasome subunit alpha type-7;Proteasome subunit alpha type	PSMA7;hCG_41772	92	92	0
E9PLK3;P55786;B7Z899;B7Z4B2;B3KU93;B7Z1H4;B3KTP2;B7Z1V9	Puromycin-sensitive aminopeptidase	NPEPPS	92	92	0
A0A0B4J1Z1;B4DEK2;C9JAB2;Q16629;Q8NB80	Serine/arginine-rich splicing factor 7	SRSF7	92	92	0
A0A024R1A3;P22314;B4DDE4;B4DL67	Ubiquitin-like modifier-activating enzyme 1	UBE1;UBA1	92	92	0
A8K6Q8;B7Z2I6			92	92	0
A8K141		CTNNA3	92	92	0
E4W6B6;B2R4D8;A0A024R1V4;P61353;K7ELC7;K7EQQ9	60S ribosomal protein L27	RPL27	92	92	0
P62263;H0YB22;E5RH77	40S ribosomal protein S14	RPS14	92	92	0
E9PDN5;A0A075B6G3;A0A087WV90;A0A087WTU7		DMD	92	92	0
P78527	DNA-dependent protein kinase catalytic subunit	PRKDC	92	92	0
Q9UFM8;Q9Y639;Q9Y499	Neuroplastin	DKFZp566H1924;NPTN	92	92	0
Q53YD7;P26641;B4DUP0	Elongation factor 1-gamma	EEF1G	92	92	0
A0A024RAI1;P61158;B4DXW1;Q59FV6;B4DT29;B4DTI0	Actin-related protein 3	ACTR3	92	92	0
P63261;B4E3A4;B4DVQ0;I3L3I0;I3L1U9	Actin, cytoplasmic 2;Actin, cytoplasmic 2, N-terminally processed	ACTG1	92	92	0
Q5QTS3;P40429;Q9BSQ6;Q53H34;M0QYS1;Q8J015;Q0VGL3	60S ribosomal protein L13a	RPL13A;RPL13a	92	92	0
Q6IB71;A0A140VK43;P25788	Proteasome subunit alpha type;Proteasome subunit alpha type-3	PSMA3	92	92	0
A8K6Y1;Q6PIN5;A0A024RB85;Q9UQ80;Q05D08;F8VR77	Proliferation-associated protein 2G4	PA2G4	92	92	0
B4DSE2;B4E0C7;Q53HP2;D3DQU2;O14773;B2R608;B4DE89	Tripeptidyl-peptidase 1	TPP1	92	92	0
A0A140VK70;P35998;Q75L23	26S protease regulatory subunit 7	PSMC2	92	92	0
A0A0A0MRJ6;H7BY58;P22061;F6S8N6;B7Z972	Protein-L-isoaspartate O-methyltransferase;Protein-L-isoaspartate(D-aspartate) O-methyltransferase	PCMT1	92	92	0
B4DJ09			92	92	0
A0A024RDE8;Q96HC4;H0Y8Y3;Q4W5K9	PDZ and LIM domain protein 5	PDLIM5;LIM	92	92	0
A0A024QZ62;Q14254;Q6FG43;E7EMK3;J3QLD9;Q9BTI6;K7EKW9	Flotillin-2	hCG_1998851;FLOT2	92	92	0
Q6IBC4;O75380;D6RBT3	NADH dehydrogenase [ubiquinone] iron-sulfur protein 6, mitochondrial	NDUFS6	92	92	0
E5RI99;A0A024R9D3;P62888	60S ribosomal protein L30	RPL30	92	92	0
Q8NB12;E9PHG3;Q5GJ33;Q5HYE8;Q5GJ32	Histone-lysine N-methyltransferase SMYD1	SMYD1;DKFZp313O0925	92	92	0
B2RB23;P42765;A0A0B4J2A4;B3KNP8;K7EME0	3-ketoacyl-CoA thiolase, mitochondrial	ACAA2	92	92	0
P12110	Collagen alpha-2(VI) chain	COL6A2	92	92	0
A0A024RCM3;Q13838;A0A0G2JJZ9;Q5STU3;B4DP52;A0A140T9X3;F6WLT2;A0A140T9X9;A0A140T996;F6UJC5;A0A140TA18;A0A0A0MT12;F6TRA5	Spliceosome RNA helicase DDX39B	hCG_2005638;DDX39B	92	92	0
A0A158RFU6;P51149;C9J8S3;C9J4V0;C9J4S4;C9J592	Ras-related protein Rab-7a	RAB7A	92	92	0
V9HWC7;P30041	Peroxiredoxin-6	HEL-S-128m;PRDX6	92	92	0
B2R9K8;A0A024RDL1;P40227;Q59ET3;A1JUI8;B4DPJ8;B4DN39	T-complex protein 1 subunit zeta	CCT6A	92	92	0
B2R8P6;Q9Y2P4	Long-chain fatty acid transport protein 6	SLC27A6	92	92	0
A0A0S2Z3D5;P02649;J9ZVQ3;H0Y7L5;E9PEV4;E7ERP7	Apolipoprotein E	APOE	92	92	0
Q5T0G8;P50995;Q6ICS0;Q59EP1;B7Z6L0;B4DPJ2	Annexin;Annexin A11	ANXA11	92	92	0
Q92736;H7BY35	Ryanodine receptor 2	RYR2	92	92	0
Q6IAW5;O43852;B3KQF5	Calumenin	CALU	92	92	0
H0YJ34;A0A0U1RRM8		FERMT2	92	92	0
V9HWE0;P08758;D6RBE9;D6RBL5;E9PHT9	Annexin;Annexin A5	HEL-S-7;ANXA5	92	92	0
Q53GL6;Q9UKM9;A8K4T9;Q5QPL9;Q5QPM1;B4DSJ1;Q5QPM0	RNA-binding protein Raly	RALY	92	92	0
Q6PI78	Transmembrane protein 65	TMEM65	92	92	0
A0A140VJZ1;P45974	Ubiquitin carboxyl-terminal hydrolase 5	USP5	92	92	0
P78539;V9HW11	Sushi repeat-containing protein SRPX	SRPX;HEL-S-83p	92	92	0
P62750;H7BY10;K7EJV9;K7ERT8;A8MUS3;K7EMA7	60S ribosomal protein L23a	RPL23A	92	92	0
Q9BUF5;B4DP54;K7ESM5;B3KS31;B4E386	Tubulin beta-6 chain	TUBB6	92	92	0
Q9Y623	Myosin-4	MYH4	92	92	0
A0A024R6G4;Q02252;Q53H94;Q53FN8;G3V4Z4	Methylmalonate-semialdehyde dehydrogenase [acylating], mitochondrial	ALDH6A1	92	92	0
B4DZZ0;B3KQB4;A0A024R371;O75915	PRA1 family protein 3	ARL6IP5	92	92	0
P29966;Q6NVI1	Myristoylated alanine-rich C-kinase substrate	MARCKS	92	92	0
E7EVA0;P27816	Microtubule-associated protein;Microtubule-associated protein 4	MAP4	92	92	0
B4DL06;A0A024R2Q3;P35222;B4DGU4;B5BU28;B4DSW9	Catenin beta-1	CTNNB1	92	92	0
B1AKD8;Q5TZA2;A1L0S9;A1L0S8;A0A087WW81	Rootletin	CROCC	92	92	0
B2RA03;A0A024RAY2;P05783;F8VZY9;I6L965	Keratin, type I cytoskeletal 18	KRT18	92	92	0
P17987;E7ERF2;E7EQR6;F5H282	T-complex protein 1 subunit alpha	TCP1	92	92	0
A0A024QZP6;Q9P0M6;Q9HA11;Q5SQT3	Core histone macro-H2A;Core histone macro-H2A.2;Histone H2A	H2AFY2	92	92	0
Q02880;Q71UH4;B4DKD0;E9PCY5;Q59H80	DNA topoisomerase 2-beta;DNA topoisomerase 2	TOP2B	92	92	0
B4DMF5;E9KL48;P00367;B4E0N9;Q53GW3;B4DMG8;B3KT18;A0A140VK14;P49448	Glutamate dehydrogenase;Glutamate dehydrogenase 1, mitochondrial;Glutamate dehydrogenase 2, mitochondrial	GLUD1;GLUD2	92	92	0
A8K517;P62266;D6RD47	40S ribosomal protein S23	RPS23	92	92	0
P47756;B2R7T8;B1AK87;B1AK88;B4DWA6;B1AK85	F-actin-capping protein subunit beta	CAPZB	92	92	0
P13807;Q53ER0;A8K6K7;B7Z806;B7Z6I6	Glycogen [starch] synthase, muscle	GYS1	92	92	0
Q5U0I6;P62820;E7END7;B7Z8M7	Ras-related protein Rab-1A	RAB1A	92	92	0
E7EV99;E7ENY0;P35611;Q96D30;A0A0A0MSR2;Q4TT76;H0Y9H2	Alpha-adducin	ADD1;LA04NC01-25A3.2-001	92	92	0
O43390;Q0VGD6;B4DMB1;B2R7W4;B4DT28	Heterogeneous nuclear ribonucleoprotein R	HNRNPR;HNRPR	92	92	0
Q53R19;O15144;Q9BXV5;A0A024R408	Actin-related protein 2/3 complex subunit 2	ARPC2	92	92	0
Q14112;A0A087WZP6;H0YJV3;B4DPX8	Nidogen-2	NID2	92	92	0
O43776;B4DN60	Asparagine--tRNA ligase, cytoplasmic	NARS	92	92	0
H3BRU6;F8VZX2;Q15366;B4DRD7	Poly(rC)-binding protein 2	PCBP2	92	92	0
A0A140VK56;P37837;F2Z393	Transaldolase	TALDO1	92	92	0
Q9H9B4;D6RFI0	Sideroflexin-1	SFXN1	92	92	0
F8W930;Q9Y6M1;B4DKT5	Insulin-like growth factor 2 mRNA-binding protein 2	IGF2BP2	92	92	0
Q9UKU7;Q59FC2	Isobutyryl-CoA dehydrogenase, mitochondrial	ACAD8	92	92	0
Q9NP72;A0A087X163;B7Z5V3;Q5W0J0;B7Z4P9;H0Y6T8	Ras-related protein Rab-18	RAB18	92	92	0
P18124;A0A024R814;A8MUD9	60S ribosomal protein L7	RPL7	92	92	0
O60493	Sorting nexin-3	SNX3	92	92	0
Q9UKX3	Myosin-13	MYH13	92	92	0
A7E2D8;Q68DH9	Calcium-transporting ATPase	ATP2B4;DKFZp686M088	92	92	0
A0A024R9B9;A0A024R9H1		MATN2	92	92	0
B2R9T9;Q9BVC6;B4E1S3	Transmembrane protein 109	TMEM109	92	92	0
Q53EW8;Q16762;B4DVZ4	Sulfurtransferase;Thiosulfate sulfurtransferase	TST	92	92	0
P47985;P0C7P4	Cytochrome b-c1 complex subunit Rieske, mitochondrial;Cytochrome b-c1 complex subunit 11;Putative cytochrome b-c1 complex subunit Rieske-like protein 1	UQCRFS1;UQCRFS1P1	92	92	0
Q8N1H4;Q68DZ9;Q59GA1;B2RDQ3;P62995;H7BXF3	Transformer-2 protein homolog beta	DKFZp686F18120;TRA2B	92	92	0
A0A024R8S5;P07237;B4DUA5;H7BZ94;B4DLN6;B4DNL5;H0Y3Z3	Protein disulfide-isomerase	P4HB	92	92	0
Q6FGX2;B6D427;P19429;Q6FGU5;K7EN02	Troponin I, cardiac muscle	TNNI3	92	92	0
C9JFR7;G4XXL9;P99999	Cytochrome c	CYCS	92	92	0
P61160;Q8IY98;F5H6T1;B4DHK9;B4DWQ5	Actin-related protein 2	ACTR2	92	92	0
P02452;Q6LAN8;H9C5C5	Collagen alpha-1(I) chain	COL1A1	92	92	0
A0A024R663;Q86UP2	Kinectin	KTN1	92	92	0
Q86VG2;P23246;Q9BSV4;Q6PIX2	Splicing factor, proline- and glutamine-rich	SFPQ	92	92	0
A0A0R4J2E8;A8MXP9;P43243;D6REM6;Q68D11;D6R991	Matrin-3	MATR3;DKFZp686K23100	92	92	0
A0A087WWD4;P13591;A0A087WX77;A0A087WV75	Neural cell adhesion molecule 1	NCAM1	92	92	0
P40123;Q5JPJ8;A0A087X0J3;A0A087WZ15;E9PDI2;B7Z4M3;B7Z385	Adenylyl cyclase-associated protein 2;Adenylyl cyclase-associated protein	CAP2;DKFZp686D0714	92	92	0
B3KTQ2;A0A024RC55;Q08431;A0A024RC59;F5GZN3;B4E396	Lactadherin;Lactadherin short form;Medin	MFGE8	92	92	0
A0A024RCC9;B7ZAK9;B7ZB83;B4DS05;Q99733;B7ZAC7;C9J6D1;C9JZI7;E9PNW0;E9PJJ2;E9PS34;E9PNJ7;A8MXH2;E9PKT8	Nucleosome assembly protein 1-like 4	NAP1L4	92	92	0
Q92506	Estradiol 17-beta-dehydrogenase 8	HSD17B8	92	92	0
P12429;D6RA82	Annexin A3;Annexin	ANXA3	92	92	0
A0A024R1X4;Q9Y2R0;K7EPV0	Cytochrome c oxidase assembly factor 3 homolog, mitochondrial	hCG_16955;COA3	92	92	0
B7Z964;H7C3M8		SLMAP	92	92	0
O00330;B2R673	Pyruvate dehydrogenase protein X component, mitochondrial	PDHX	92	92	0
P62280;M0QZC5	40S ribosomal protein S11	RPS11	92	92	0
A0A024QZ64;P09972;B7Z3K9;B7Z1Y2;B7Z1N6;A8MVZ9;B7Z3K7;J3KSV6;J3QKP5;C9J8F3	Fructose-bisphosphate aldolase;Fructose-bisphosphate aldolase C	ALDOC	92	92	0
Q9BXW7	Cat eye syndrome critical region protein 5	CECR5	92	92	0
A0A090N8Y2;P13667	Protein disulfide-isomerase A4	ERP70;PDIA4	92	92	0
Q6FGX3;A0A024R5H8;Q53ET8		RAB6A	92	92	0
A0A024R4A0;P19338;B3KTP9;B3KM80;Q6ZS99;Q9BQ02;H7BY16	Nucleolin	NCL	92	92	0
P37108;H0YLA2	Signal recognition particle 14 kDa protein	SRP14	92	92	0
B2ZZ89;Q01082;A0A087WUZ3;D6W5C0;K9MS24	Spectrin beta chain, non-erythrocytic 1	SPTBN1	92	92	0
A0A140VJX1;P24752	Acetyl-CoA acetyltransferase, mitochondrial	ACAT1	92	92	0
O15230	Laminin subunit alpha-5	LAMA5	92	92	0
Q6IAT1;B4DLV7;P50395	Rab GDP dissociation inhibitor beta	GDI2	92	92	0
A0A087WTA8;A0A0S2Z3H5;P08123	Collagen alpha-2(I) chain	COL1A2	92	92	0
Q9NSE4;A8K5W7	Isoleucine--tRNA ligase, mitochondrial	IARS2	92	92	0
A0A087WZN1;O43837;A0A087X2E5	Isocitrate dehydrogenase [NAD] subunit, mitochondrial;Isocitrate dehydrogenase [NAD] subunit beta, mitochondrial	IDH3B	92	92	0
Q9UNS2;H7C3P9;B4DN01	COP9 signalosome complex subunit 3	COPS3	92	92	0
D3DUJ0;Q8TA92;Q9Y4W6	AFG3-like protein 2	AFG3L2	92	92	0
P14927;B7Z2R2;E5RHG9	Cytochrome b-c1 complex subunit 7	UQCRB	92	92	0
Q9BTQ7;A0A024R1Q8;P62829;C9JD32;J3KT29;J3KTJ3;B9ZVP7	60S ribosomal protein L23	RPL23	92	92	0
Q6IB11;O00264	Membrane-associated progesterone receptor component 1	PGRMC1	92	92	0
Q6NUR7;E7EQR4;P15311;V9HW42;B2R6J2;B7Z5V2;B7Z437	Ezrin	EZR;HEL-S-105	92	92	0
Q5ST80;O75955;Q6IB58;Q53HQ0;A0A140T9R1;A2VCL5;A0A140T9X0;A2AB09;A2AB10	Flotillin-1	FLOT1	92	92	0
A0A024RAG3;P11234;C9J6B1;C9JQB3;B4E364	Ras-related protein Ral-B	RALB	92	92	0
Q03252	Lamin-B2	LMNB2	92	92	0
A0A024R413;O43676;C9JKQ2	NADH dehydrogenase [ubiquinone] 1 beta subcomplex subunit 3	NDUFB3	92	92	0
F8W1R7;G3V1V0;P60660;J3KND3;G8JLA2;B7Z6Z4;G3V1Y7;F8VPF3;Q6IBG5;F8VZU9;F8W180	Myosin light polypeptide 6	MYL6	92	92	0
B3KTA3;Q16658	Fascin	FSCN1	92	92	0
Q6I9R8;Q2XQU9;J3KNW4;A0A0A0MSG2;Q14192;Q2TSB7;I0CE67;Q53T40	Four and a half LIM domains protein 2	FHL2;AAG11	92	92	0
P13010;Q53T09	X-ray repair cross-complementing protein 5	XRCC5	92	92	0
A0A0S2Z3H8;P63092;Q5JWF2;B0AZR9;A0A0S2Z3S5;Q14455;Q5FWY2;S4R3E3	Guanine nucleotide-binding protein G(s) subunit alpha isoforms short;Guanine nucleotide-binding protein G(s) subunit alpha isoforms XLas	GNAS;GSA	92	92	0
H9ZYJ2;P10599	Thioredoxin	TXN	92	92	0
A6NLG9;B4DDQ2;Q53FI4;A8K7E0;P21810;B3KS75;Q53HU6;Q8NAB7;B4DNL4;B4DQD6;B4DDN7	Biglycan	BGN	92	92	0
P49189;B4DE91;B9EKV4;B4DX14;B4DYY1	4-trimethylaminobutyraldehyde dehydrogenase	ALDH9A1	92	92	0
V9HW92;O00151	PDZ and LIM domain protein 1	HEL-S-112;PDLIM1	92	92	0
A0A024RAK5;P17540;B2R8A3;B3KVA7	Creatine kinase S-type, mitochondrial	CKMT2	92	92	0
A0A024RB09;P61020;Q6FI54	Ras-related protein Rab-5B	RAB5B	92	92	0
A0A1B0GTG2;A0A1B0GW77;P49419;A0A1B0GUA1;A0A1B0GW82;A0A1B0GTY9;A0A1B0GTJ4;A0A1B0GV49;A0A140T9V3;A0A0J9YWF7	Alpha-aminoadipic semialdehyde dehydrogenase	ALDH7A1	92	92	0
A0A024R4M8;Q8NBN7;B2RDH1;G8JLA1	Retinol dehydrogenase 13	RDH13	92	92	0
O14958;B4DEF0	Calsequestrin-2;Calsequestrin	CASQ2	92	92	0
P30084	Enoyl-CoA hydratase, mitochondrial	ECHS1	92	92	0
P34932;B4DH02;V9HW33;Q59GF8;B4DUS3;B4DIZ3;B4DT47;B4E354;B4E0H6	Heat shock 70 kDa protein 4	HSPA4;HEL-S-5a	92	92	0
Q0ZGT2;D3DQ79;H7BXY5;B4DDI0	Nexilin	NEXN	92	92	0
Q9UHQ9;H7C0R7	NADH-cytochrome b5 reductase 1	CYB5R1	92	92	0
Q6NZ55;A8K4C8;P26373;J3QSB4	60S ribosomal protein L13	RPL13	92	92	0
Q15124	Phosphoglucomutase-like protein 5	PGM5	92	92	0
P14543	Nidogen-1	NID1	92	92	0
V9HWJ2;O75874;Q0QER2;V9HW78;Q6FIA4;B2R5M8;Q6FI37	Isocitrate dehydrogenase [NADP];Isocitrate dehydrogenase [NADP] cytoplasmic	HEL-S-26;IDH1;HEL-216	92	92	0
P25789;H0YN18;B2RDG0;H0YMZ1;H0YL69;H0YMA1;H0YKT8	Proteasome subunit alpha type-4;Proteasome subunit alpha type;Proteasome subunit beta type	PSMA4	92	92	0
P50991;A8K3C3;B7Z9L0;B7Z2Z8;B7Z2F4	T-complex protein 1 subunit delta	CCT4	92	92	0
Q8N5M1;C9J2Q2	ATP synthase mitochondrial F1 complex assembly factor 2	ATPAF2	92	92	0
D3DVC4;P48681	Nestin	NES	92	92	0
E5KNY5;P42704;B4DSR0	Leucine-rich PPR motif-containing protein, mitochondrial	LRPPRC	92	92	0
A0A087WVQ6;Q00610	Clathrin heavy chain;Clathrin heavy chain 1	CLTC	92	92	0
V9HWC0;P26038;Q6PJT4	Moesin	HEL70;MSN	92	92	0
Q53F48;A0A024QZK8;P31942;B4DHY1;A0A024QZP1	Heterogeneous nuclear ribonucleoprotein H3	HNRPH3;HNRNPH3	92	92	0
B2R761;P22307;B4E0J3;H0YF61	Non-specific lipid-transfer protein	SCP2	92	92	0
B5BUB5;P05455	Lupus La protein	SSB	92	92	0
Q96CN7;D6RGE2;Q9Y3B5	Isochorismatase domain-containing protein 1	ISOC1	92	92	0
O76041;B0YJ47;Q2TBD1	Nebulette	NEBL	92	92	0
M0R0F0;A0A024R4Q8;P46782;Q53G25;M0R0R2;M0QZN2	40S ribosomal protein S5;40S ribosomal protein S5, N-terminally processed	RPS5	92	92	0
B2R825;P06737;E9PK47	Alpha-1,4 glucan phosphorylase;Glycogen phosphorylase, liver form	PYGL	92	92	0
E9KL35;P63244;J3KPE3;D6RAC2;D6REE5;H0YAF8;H0Y8W2;D6RHH4;H0YAM7;D6R9Z1;D6R9L0	Guanine nucleotide-binding protein subunit beta-2-like 1;Guanine nucleotide-binding protein subunit beta-2-like 1, N-terminally processed	GNB2L1	92	92	0
P04899;B3KX51;Q96C71;B3KP24;Q93020	Guanine nucleotide-binding protein G(i) subunit alpha-2	GNAI2;WUGSC:H_LUCA16.1	92	92	0
A0A140VK44;G3V5Z7;P60900;G3V295;G3V3I1	Proteasome subunit alpha type;Proteasome subunit alpha type-6	PSMA6	92	92	0
Q53GR7;Q9UJS0;B7Z2E2	Calcium-binding mitochondrial carrier protein Aralar2	SLC25A13	92	92	0
Q14204	Cytoplasmic dynein 1 heavy chain 1	DYNC1H1	92	92	0
Q16891;B9A067;B4DQY2;B4DKR1;B4DT20	MICOS complex subunit MIC60	IMMT	92	92	0
Q15907;H3BMH2;H3BSC1;A0A024R5Z8;P62491;B4DMN1	Ras-related protein Rab-11B;Ras-related protein Rab-11A	RAB11B;RAB11A	92	92	0
H3BLZ8;Q59F66;Q92841	Probable ATP-dependent RNA helicase DDX17	DDX17	92	92	0
A8KAH9;P62834;Q5U0C3;A0A075B6Q0	Ras-related protein Rap-1A	RAP1A	92	92	0
A9LSU1;Q59F15;P02462	Collagen alpha-1(IV) chain;Arresten	COL4A1	92	92	0
A0A087WXM8;I7L574;I7KDP0;G0TQY6;A0A0A1TTQ0;P50895;A0A068W6H0;K7ENU8	Basal cell adhesion molecule	BCAM;LU	92	92	0
A0A024R3W7;P24534;A4D1M6	Elongation factor 1-beta	EEF1B2;LOC392793	92	92	0
H0YKD8;P46779;H0YMF4;H0YLP6;Q59F34	60S ribosomal protein L28	RPL28	92	92	0
A0A0S2A4E4;P35573;A0A0M4G3H8;G1UI17	Glycogen debranching enzyme;4-alpha-glucanotransferase;Amylo-alpha-1,6-glucosidase	AGL	92	92	0
Q6DHZ2;A0A024R712;P31323;B3KY43;Q75MP1	cAMP-dependent protein kinase type II-beta regulatory subunit	PRKAR2B	92	92	0
Q08211;Q58F26;Q6PJK6	ATP-dependent RNA helicase A	DHX9	92	92	0
B5BUB1;Q9Y265;E7ETR0;B3KRS7	RuvB-like 1	RUVBL1	92	92	0
Q5U071;P26583;D6R9A6	High mobility group protein B2	HMGB2	92	92	0
Q71UI9;P0C0S5;C9J0D1;C9J386	Histone H2A.V;Histone H2A.Z;Histone H2A	H2AFV;H2AFZ	92	92	0
Q5CAQ5;V9HWP2;P14625;B4DHT9;B4DU71;Q59FC6	Endoplasmin	TRA1;HEL-S-125m;HSP90B1	92	92	0
A0A0A0MRL6;F8W8M4;J3QSX6		ABLIM1	92	92	0
P24043;A0A087WX80;A0A087WYF1;Q59H37	Laminin subunit alpha-2	LAMA2	92	92	0
P23396;Q53G83;E9PL09;E9PPU1;H0YEU2;F2Z2S8;H0YCJ7;Q9NQS8;H0YF32	40S ribosomal protein S3	RPS3	92	92	0
V9HW96;P78371;F5GWF6;F8VQ14	T-complex protein 1 subunit beta	HEL-S-100n;CCT2	92	92	0
Q0QEW2;H0YHA7;A0A024QZD1;J3QQ67;Q07020;G3V203;F8VUA6;F8VYV2;B4DDY5;A0A075B7A0	60S ribosomal protein L18	RPL18	92	92	0
E7EPW4;A0A0A0MRJ5;A0A0A0MRJ4;P45379;Q7Z554;A0A024R953;Q15607;Q15608;E7EPN8	Troponin T, cardiac muscle	TNNT2;HNTN1	92	92	0
Q15118;Q53R49;B7Z7N6;B7Z207;C9IYB4	[Pyruvate dehydrogenase (acetyl-transferring)] kinase isozyme 1, mitochondrial	PDK1	92	92	0
Q07960;B4DPZ4;H0YE29	Rho GTPase-activating protein 1	ARHGAP1	92	92	0
H0YN26;Q6PKH8;Q08AJ6;P39687;Q3KPI8	Acidic leucine-rich nuclear phosphoprotein 32 family member A	ANP32A	92	92	0
P49411	Elongation factor Tu, mitochondrial	TUFM	92	92	0
Q6IRT1;Q6FI45;P11766;Q5U043;Q2VIM7;H0YAG8	S-(hydroxymethyl)glutathione dehydrogenase;Alcohol dehydrogenase class-3	ADH5	92	92	0
Q9NQC3;Q53RF4	Reticulon-4	RTN4	92	92	0
Q04446;Q59ET0;E9PGM4;B4DUF1;B4DNJ3	1,4-alpha-glucan-branching enzyme	GBE1	92	92	0
A0A024R8S3;P61956	Small ubiquitin-related modifier;Small ubiquitin-related modifier 2	SUMO2	92	92	0
A0A024R0Y5;P08237;A0A0S2Z4A1;Q96I60;A0A0S2Z4I1;Q7KYX9	ATP-dependent 6-phosphofructokinase;ATP-dependent 6-phosphofructokinase, muscle type	PFKM	92	92	0
Q9UDW1	Cytochrome b-c1 complex subunit 9	UQCR10	92	92	0
Q8TC62;E7ES33;Q3LIE9;A4GYY8;E7EPK1;Q16181;B4DUD6;A8K3D0;Q59EY4	Septin-7	SEPT7;Nbla02942;DKFZp686F17268	92	92	0
G3V0I5;E5KNH5;P49821;Q53G70;Q96ID4;B4DE93;B4DUN7	NADH dehydrogenase [ubiquinone] flavoprotein 1, mitochondrial	NDUFV1	92	92	0
Q6FGI7;P24310;K7ER11;H6SG12	Cytochrome c oxidase subunit 7A1, mitochondrial	COX7A1	92	92	0
V9HWI0;P14550	Alcohol dehydrogenase [NADP(+)]	HEL-S-165mP;AKR1A1	92	92	0
A8K761;O96000;H3BPJ9;H3BV16	NADH dehydrogenase [ubiquinone] 1 beta subcomplex subunit 10	NDUFB10	92	92	0
V9HWC6;P23284	Peptidyl-prolyl cis-trans isomerase;Peptidyl-prolyl cis-trans isomerase B	HEL-S-39;PPIB	92	92	0
V9HW24;A0A087X2I1;P62333	26S protease regulatory subunit 10B	HEL-S-73;PSMC6	92	92	0
O75947;A0PJH2	ATP synthase subunit d, mitochondrial	ATP5H	92	92	0
A0A140VK76;A0A0A0MSE2;Q16836;E9PF18	Hydroxyacyl-coenzyme A dehydrogenase, mitochondrial	HADH	92	92	0
P23368	NAD-dependent malic enzyme, mitochondrial	ME2	92	92	0
B3KMV8;O75746	Calcium-binding mitochondrial carrier protein Aralar1	SLC25A12	92	92	0
A0A0M4FEM1;P11217;B4DRW6;B2RB32;B4DRQ4	Glycogen phosphorylase, muscle form;Alpha-1,4 glucan phosphorylase	PYGM	92	92	0
A0A0D9SGF6;B4DGT1		SPTAN1	92	92	0
Q53H01;A8K0B6;D3DSQ1;B3KUZ6		ASAH1	92	92	0
P15880;Q3KQT6;Q8N5L9;Q6IPX5;H0YEN5;Q8J014;E9PQD7;E9PMM9;I3L404;E9PPT0;Q8NI61;E9PM36	40S ribosomal protein S2	RPS2;rps2;OK/KNS-cl.7	92	92	0
A0A0K0K1L8;Q06323;Q6FHU3	Proteasome activator complex subunit 1	PSME1	92	92	0
F8W1A4;A0A140VK93;P54819;F8VZG5;B4DLK2;F8VY04;G3V213	Adenylate kinase 2, mitochondrial;Adenylate kinase 2, mitochondrial;Adenylate kinase 2, mitochondrial, N-terminally processed	AK2	92	92	0
Q5R352;P26678	Cardiac phospholamban	PLN	92	92	0
D6R9P3;D6RD18;B4DMY3;D6RBZ0;Q53F64;Q99729	Heterogeneous nuclear ribonucleoprotein A/B	HNRNPAB	92	92	0
A0A1B0GW44;A0A1B0GVD5;A0A1B0GWE8;V9HWI3;P07339;A0A1B0GV23;A0A1B0GVP3;H7C469;H7C1V0	Cathepsin D;Cathepsin D light chain;Cathepsin D heavy chain	HEL-S-130P;CTSD	92	92	0
A3KPC7;A0A024RAS2;B2R5B3;A4FTV9;A0A0U1RR32;A0A0U1RRH7;Q99878;Q96KK5;Q9BTM1;P20671;P0C0S8;H0YFX9;B4E0B3	Histone H2A;Histone H2A type 1-J;Histone H2A type 1-H;Histone H2A.J;Histone H2A type 1-D;Histone H2A type 1	HIST1H2AH;H2AFJ;HIST1H2AK;HIST1H2AJ;HIST1H2AD;HIST1H2AG	92	92	0
D9IAI1;P30086;A0A0K0K1J6;B4DRT4;V9HW05	Phosphatidylethanolamine-binding protein 1;Hippocampal cholinergic neurostimulating peptide	HEL-S-34;PEBP1;HEL-210	92	92	0
V9HWB6;O14558;B4DNC2;K7EP04	Heat shock protein beta-6	HEL55;HSPB6	92	92	0
Q7Z4W8;P35268;K7EP65;K7EKS7;K7ELC4;K7EMH1;K7ERI7;K7EJT5	60S ribosomal protein L22	RPL22	92	92	0
Q5JR94;P62241;Q5JR95;Q9BS10	40S ribosomal protein S8	RPS8	92	92	0
P15259;A4D2J6	Phosphoglycerate mutase 2;Phosphoglycerate mutase	PGAM2	92	92	0
CON__P02769			92	92	0
Q53SS8;Q15365	Poly(rC)-binding protein 1	PCBP1	92	92	0
B4DY23;Q54A51;P35613;B4DNE1;A0A087X2B5;I3L192;A0A087WUV8	Basigin	hEMMPRIN;BSG	92	92	0
V9HW63;Q13162;H7C3T4	Peroxiredoxin-4	HEL-S-97n;PRDX4	92	92	0
F5H2U8;F5H2A4;F6LHU9;Q1M183;F5H6H0;P52926;D2WHG0;A5Y0M9	High mobility group protein HMGI-C	HMGA2	92	92	0
Q15149	Plectin	PLEC	92	92	0
M0R117;B4DM74;Q02543;M0R3D6;M0R1A7;B4DM94;B4DUV3;B2R4C0;Q53HD3;M0R0P7;Q32XH3	60S ribosomal protein L18a	RPL18A	92	92	0
V9HWB4;P11021	78 kDa glucose-regulated protein	HEL-S-89n;HSPA5	92	92	0
J3QLE5;Q66K91;Q5XPV6;B4DVS0;X5DP00;Q15182;P63162;P14678;Q53HE7;Q9UIS4;J3KRY3;S4R3P3;Q6LBS1	Small nuclear ribonucleoprotein-associated protein;Small nuclear ribonucleoprotein-associated protein N;Small nuclear ribonucleoprotein-associated proteins B and B	SNRPN;SNRPB	92	92	0
V9HW65;A0A024R5Z7;P07355;H0YN42;H0YMD0;H0YMU9;A6NMY6;H0YM50;H0YKS4;B3KRQ1;H0YN28;H0YL33;H0YNP5;B4DNH8	Annexin;Annexin A2;Putative annexin A2-like protein	HEL-S-270;ANXA2;ANXA2P2	92	92	0
B3KT06;B3KPS3;P68363;A8JZY9;B4DDU2;F8VVB9	Tubulin alpha-1B chain	TUBA1B	92	92	0
Q8WZ42	Titin	TTN	92	92	0
V9HWI5;P23528;G3V1A4;E9PP50;E9PK25;E9PQB7;B4E112;E9PLJ3;E9PS23	Cofilin-1	HEL-S-15;CFL1	92	92	0
B4DFL1;A0A024R713;P09622;E9PEX6;B4DMK9	Dihydrolipoyl dehydrogenase;Dihydrolipoyl dehydrogenase, mitochondrial	DLD	92	92	0
V9HVZ6;Q92747;Q53GB6;A0A0K0K1L3;Q59GQ0;E9PF58;Q75MY0	Actin-related protein 2/3 complex subunit 1A	HEL-68;ARPC1A	92	92	0
Q6FI52;Q5U0D2;Q01995;Q53GC9;H0YCU9;Q59FA5	Transgelin	TAGLN	92	92	0
Q6IPH7		RPL14	92	92	0
A0A0S2Z2Z6;P08133;A8K3Q7;B7Z582;Q6ZP35;E7EMC6	Annexin A6;Annexin	ANXA6	92	92	0
A0A024R7V6;P61019;A0A0A1HAW1;E9PKL7	Ras-related protein Rab-2A	RAB2;RAB2A	92	92	0
V9HW35;P30044	Peroxiredoxin-5, mitochondrial	HEL-S-55;PRDX5	92	92	0
P56385	ATP synthase subunit e, mitochondrial	ATP5I	92	92	0
B7Z4V2;V9HW84;P38646;Q8N1C8;B7Z4T3;B7Z1V7	Stress-70 protein, mitochondrial	HEL-S-124m;HSPA9	92	92	0
A0A140VK69;P17174;Q2TU84;B7Z1I2	Aspartate aminotransferase, cytoplasmic;Aspartate aminotransferase	GOT1;GIG18	92	92	0
A8K9B9;A0A024R9N6;Q9H223	EH domain-containing protein 4	EHD4	92	92	0
B4DE59			92	92	0
Q16851;B2RAN1;A0A087WYS1;E7EUC7;B4DUP2;Q53QE9	UTP--glucose-1-phosphate uridylyltransferase	UGP2	92	92	0
B4DN41;J3KTA4;P17844;B5BUE6;B4DNG2;Q7Z2V5;Q59E92	Probable ATP-dependent RNA helicase DDX5	DDX5;DKFZp686J01190	92	92	0
P23526;Q1RMG2	Adenosylhomocysteinase	AHCY	92	92	0
P62081;B5MCP9	40S ribosomal protein S7	RPS7	92	92	0
CON__P00761			92	92	0
F8WCF6;P59998;F8WDD7;Q9H7Z5	Actin-related protein 2/3 complex subunit 4	ARPC4-TTLL3;ARPC4	92	92	0
Q6NXR8;A8K4W0;P61247;D6RG13;D6RAT0;B7Z3M5;D6RB09;E9PFI5;H0Y9Y4;H0Y8L7;D6R9B6;D6RAS7	40S ribosomal protein S3a	RPS3A	92	92	0
B2RBR9;Q14974;J3KTM9;B7Z752	Importin subunit beta-1	KPNB1	92	92	0
P15924;Q4LE79	Desmoplakin	DSP;DSP variant protein	92	92	0
V9HWC2;Q99497;K7ELW0;K7EN27	Protein deglycase DJ-1	HEL-S-67p;PARK7	92	92	0
J3KS22;Q7Z4W1;J3QS36;J3KRZ4;J3QS45;J3KSZ5	L-xylulose reductase	DCXR	92	92	0
P31930	Cytochrome b-c1 complex subunit 1, mitochondrial	UQCRC1	92	92	0
P51991	Heterogeneous nuclear ribonucleoprotein A3	HNRNPA3	92	92	0
Q7Z7M4;A0A0C4DFU2;P04179;Q7Z7M6;Q4ZJI1;Q7Z7M7;F5H3C5;F5H4R2;A0A0C4DFU1;F5GYZ5;Q7Z7M5;G8JLJ2;A0A0C4DG56	Superoxide dismutase;Superoxide dismutase [Mn], mitochondrial	SOD2	92	92	0
Q9NPC6	Myozenin-2	MYOZ2	92	92	0
P52179;A8MX12	Myomesin-1	MYOM1	92	92	0
P18077;C9K025;F8WBS5;F8WB72	60S ribosomal protein L35a	RPL35A	92	92	0
A0A0S2Z433;O43181;H0Y9M8	NADH dehydrogenase [ubiquinone] iron-sulfur protein 4, mitochondrial	NDUFS4	92	92	0
Q99623;J3KPX7;F5GY37;F5GWA7;B4DW05;F5H3X6	Prohibitin-2	PHB2	92	92	0
Q02218;A0A0D9SFS3	2-oxoglutarate dehydrogenase, mitochondrial	OGDH	92	92	0
P38117;M0QY67	Electron transfer flavoprotein subunit beta	ETFB	92	92	0
J3QRS3;P19105;O14950;Q53HL1;Q2F834	Myosin regulatory light chain 12A;Myosin regulatory light chain 12B	MYL12A;MYL12B	92	92	0
O95831;E9PMA0	Apoptosis-inducing factor 1, mitochondrial	AIFM1	92	92	0
P30048;Q53HC2	Thioredoxin-dependent peroxide reductase, mitochondrial	PRDX3	92	92	0
Q6IBH6;P61254;J3QRI7;J3QQQ9;J3QQV1;J3KTJ8;J3QRC4;A0A024RBF6	60S ribosomal protein L26	RPL26;hCG_26523	92	92	0
B6D425;A8MXZ9;Q14896;A0A0A0MQU5;F5GZR4;B4DNB5	Myosin-binding protein C, cardiac-type	MYBPC3	92	92	0
B4DUQ1;A0A024R228;Q6IBN1;P61978;B4DFF1;Q5T6W2	Heterogeneous nuclear ribonucleoprotein K	HNRPK;HNRNPK	92	92	0
Q9Y277;E5RJN6;E5RHZ6	Voltage-dependent anion-selective channel protein 3	VDAC3	92	92	0
Q9UHG3;B7Z8A2;Q584P1;B7Z3Y2;F8W8W4	Prenylcysteine oxidase 1	PCYOX1	92	92	0
A0A024R462;B7ZLE5;P02751;Q6MZM7;Q6N084;Q68CX6	Fibronectin;Anastellin;Ugl-Y1;Ugl-Y2;Ugl-Y3	FN1;DKFZp686O12165;DKFZp686L11144;DKFZp686O13149	92	92	0
E7ESZ7;Q7Z518;A8K413;A0A087WXC5;A0A024R4B3;O95299;Q53SW4	NADH dehydrogenase [ubiquinone] 1 alpha subcomplex subunit 10, mitochondrial	NDUFA10	92	92	0
D3DSM4;D3DSM5;Q8NG19;H7C457		COL18A1	92	92	0
Q6IB42;P10916;Q14908;Q7Z3Z1;G3V1V8	Myosin regulatory light chain 2, ventricular/cardiac muscle isoform	MYL2	92	92	0
Q6FGJ9;P21266;A0A0A0MTN3;A4UJ43;Q59EJ5;B4E2J2	Glutathione S-transferase Mu 3	GSTM3	92	92	0
B2R4W8;P62244;I3L3P7;A8K7H3;I3L246	40S ribosomal protein S15a	hCG_1994130;RPS15A	92	92	0
Q6FHM2;P62879;C9JXA5;E7EP32	Guanine nucleotide-binding protein G(I)/G(S)/G(T) subunit beta-2	GNB2	92	92	0
B4DSQ5			92	92	0
Q99959;B8QGS9	Plakophilin-2	PKP2	92	92	0
Q8IWX7;H0UID2	Protein unc-45 homolog B	UNC45B	92	92	0
P16401	Histone H1.5	HIST1H1B	92	92	0
Q14315	Filamin-C	FLNC	92	92	0
Q9Y230;B3KNL2;M0R0Y3	RuvB-like 2	RUVBL2	92	92	0
A0A024RDH8;P49207	60S ribosomal protein L34	RPL34	92	92	0
P05023	Sodium/potassium-transporting ATPase subunit alpha-1	ATP1A1	92	92	0
Q2TNI1;Q03135;Q59E85;E9PCT5	Caveolin;Caveolin-1	CAV1	92	92	0
Q6FG42;Q32Q14;O95182;Q6IB89	NADH dehydrogenase [ubiquinone] 1 alpha subcomplex subunit 7	NDUFA7	92	92	0
Q5SSJ5;X6RGJ2;B0QZK4;Q5SWC8	Heterochromatin protein 1-binding protein 3	HP1BP3	92	92	0
P20700;E9PBF6;Q6DC98;A0A0D9SFE5	Lamin-B1	LMNB1	92	92	0
Q08257;A6NP24;C9JH92	Quinone oxidoreductase	CRYZ	92	92	0
A0A140VJL0;Q6NVY1;B9A058	3-hydroxyisobutyryl-CoA hydrolase, mitochondrial	HIBCH	92	92	0
Q6LEU2;A3KLL5;P05026;A6NGH2	Sodium/potassium-transporting ATPase subunit beta-1	ATP1B1	92	92	0
V9HWE1;P08670;B0YJC4;Q53HU8;B3KRK8	Vimentin	HEL113;VIM	92	92	0
Q7Y6N0;Q4GVP5;C8YBL1;A0A097PWR7;Q14XT3;X2D4U2;H9E7F7;H9E7P8;A0A1B1PEQ8;H9E7W2;H9E7T7;H9PDV6;X5C6M5;X5BKA4;X2CK15;W8DFH5;W8DBX9;W8D1X2;V9K571;V9JPM6;V9J3S1;U5Z9R9;U5Z487;U3LSI8;U3L556;T1SWS8;T1Q632;S4STI1;R9Y412;Q9B2U8;Q9B138;Q8WCW3;Q8HNR1;Q85KS0;Q7YCE6;Q7Y6M3;Q6VJJ3;Q6VJD8;Q6VIG7;Q6RQ80;Q6RNN7;Q6RKW8;Q6R0V6;Q5SB08;Q5SAP1;Q5SA98;Q5S971;Q4GQP0;Q4GHE1;Q4GCZ4;Q4GCG2;Q4GCC3;Q4F4V6;Q4EZD4;Q305H0;Q19MP7…	Cytochrome c oxidase subunit 2	COX2;COII;cox2;MT-CO2	92	92	0
V9HWD6;P31946;B5BU24	14-3-3 protein beta/alpha;14-3-3 protein beta/alpha, N-terminally processed	HEL-S-1;YWHAB	92	92	0
P13929;E5RGZ4	Beta-enolase;Enolase	ENO3	92	92	0
Q9UFN0;B4DW81	Protein NipSnap homolog 3A	NIPSNAP3A	92	92	0
K7EQG4;O00168	Phospholemman	FXYD1	92	92	0
A0A140VKB0;A0A0B4J2D5;A0A096LPI6;P30042;A0A096LNH5;A0A0B4J2H4;H7C1F6;H7C2G3	ES1 protein homolog, mitochondrial	C21orf33	92	92	0
P11177;C9J634	Pyruvate dehydrogenase E1 component subunit beta, mitochondrial	PDHB	92	92	0
P30049	ATP synthase subunit delta, mitochondrial	ATP5D	92	92	0
D3DTX7		COL1A1	92	92	0
A0A024R5K8;P50454;B4DN87;A8K259;E9PR70;E9PK86;E9PMI5	Serpin H1	SERPINH1	92	92	0
Q6PUJ7;A8K401;P35232;Q6FHP5;Q53FV0;C9JW96;C9JZ20;E7ESE2;E9PCW0	Prohibitin	HEL-S-54e;PHB	92	92	0
H7BXR3;H7C1R7		SORBS2	92	92	0
A0A024QZN4;V9HWK2;P18206;Q5JQ13	Vinculin	VCL;HEL114	92	92	0
P21796;B3KTS5	Voltage-dependent anion-selective channel protein 1	VDAC1	92	92	0
Q86YI5;A0A024R3D8;P10515;B4DJX1;H0YDD4;E9PEJ4;B4DS43;B4DLQ2	Acetyltransferase component of pyruvate dehydrogenase complex;Dihydrolipoyllysine-residue acetyltransferase component of pyruvate dehydrogenase complex, mitochondrial	DLAT	92	92	0
A0A024R972;P11047	Laminin subunit gamma-1	LAMC1	92	92	0
P05556	Integrin beta-1	ITGB1	92	92	0
A0A024R319;P55268	Laminin subunit beta-2	LAMB2	92	92	0
B3KQT9;V9HVY3;P30101	Protein disulfide-isomerase;Protein disulfide-isomerase A3	HEL-S-269;PDIA3	92	92	0
A0A024R6C9;P36957;Q6IBS5;Q86TQ8;Q86TW7	Dihydrolipoyllysine-residue succinyltransferase component of 2-oxoglutarate dehydrogenase complex, mitochondrial	DLST	92	92	0
P13639;Q8TA90;B4DPU3;Q6PK56	Elongation factor 2	EEF2	92	92	0
A0A024QZ30;P31040;D6RFM5;B3KT34;A0A087X1I3;Q0QF12;B4DYN5	Succinate dehydrogenase [ubiquinone] flavoprotein subunit, mitochondrial	SDHA	92	92	0
V9HW80;P55072;Q96IF9;Q0IIN5;Q9NTC4	Transitional endoplasmic reticulum ATPase	HEL-S-70;VCP;DKFZp434K0126	92	92	0
A0A024R959;B3KW26;A0A087WT47;P19237;G3V489;G3V4F8;G3V3L5	Troponin I, slow skeletal muscle	TNNI1	92	92	0
P43155	Carnitine O-acetyltransferase	CRAT	92	92	0
G3V4W0;B4DY08;B2R5W2;G3V4C1;B2R603;A8K9A4;P07910;G3V2Q1;G3V576;B3KX96;B4DQQ2;G3V2D6;G3V5V7;D3DPI2;G3V555;G3V575;A0A0G2JPF8;A0A0G2JNQ3;P0DMR1;O60812;B7ZW38;B2RXH8	Heterogeneous nuclear ribonucleoproteins C1/C2;Heterogeneous nuclear ribonucleoprotein C-like 4;Heterogeneous nuclear ribonucleoprotein C-like 1;Heterogeneous nuclear ribonucleoprotein C-like 3;Heterogeneous nuclear ribonucleoprotein C-like 2	HNRNPC;hCG_1641229;HNRNPCL4;HNRNPCL1;HNRNPCL3;HNRNPCL2	92	92	0
A0A0S2Z366;Q5T4U5;Q5HYG7;P11310;B7Z9I1;B4DWX6;B4DJE7;B4DVE0	Medium-chain specific acyl-CoA dehydrogenase, mitochondrial	ACADM;DKFZp686M24262	92	92	0
Q5BKX8	Muscle-related coiled-coil protein	MURC	92	92	0
P36871;B4DFP1	Phosphoglucomutase-1	PGM1	92	92	0
A0A140VJS6;P49721;B7Z478;Q59FJ0	Proteasome subunit beta type-2;Proteasome subunit beta type	PSMB2	92	92	0
Q6FIC5;Q9Y696;B4DWC4;Q9NVF8	Chloride intracellular channel protein;Chloride intracellular channel protein 4	CLIC4	92	92	0
E5KSD5;D4QEZ8;P16219;E5KSE7;E9PE82;B4DUH1	Short-chain specific acyl-CoA dehydrogenase, mitochondrial	ACADS	92	92	0
P62316;K7ERG4	Small nuclear ribonucleoprotein Sm D2	SNRPD2	92	92	0
CON__P05787;P05787;Q969I0;F8VUG2;Q7L4M3	Keratin, type II cytoskeletal 8	KRT8	92	92	0
Q6IPW4;Q6IB76;A8K750;E7EPT4;P19404;Q9UEH5	NADH dehydrogenase [ubiquinone] flavoprotein 2, mitochondrial	NDUFV2	92	92	0
P35555;Q75N88	Fibrillin-1	FBN1	92	92	0
A0A024R694;P12814;Q86TX4	Alpha-actinin-1	ACTN1	92	92	0
B4DL14;B4DFE6	ATP synthase subunit gamma		92	92	0
B0QYF8;A0A024R1G3;P02144;F2Z2F1;B2RA67;F2Z337	Myoglobin	MB	92	92	0
P27144;D3DQ64	Adenylate kinase 4, mitochondrial	AK4	92	92	0
A0A024RAB6;P98160	Basement membrane-specific heparan sulfate proteoglycan core protein;Endorepellin;LG3 peptide	HSPG2	92	92	0
A0A024RBX9;P08559;Q53GE3;A5YPB6;A5PHJ9	Pyruvate dehydrogenase E1 component subunit alpha;Pyruvate dehydrogenase E1 component subunit alpha, somatic form, mitochondrial	PDHA1;PDHA1/LOC79064	92	92	0
B4DE36;P06744;A0A0A0MTS2;K7EQ48;A0A0J9YXP8;A0A0J9YX90;A0A0J9YYH3	Glucose-6-phosphate isomerase	GPI	92	92	0
Q6IBA0;O43920	NADH dehydrogenase [ubiquinone] iron-sulfur protein 5	NDUFS5	92	92	0
V9HW06;Q53ET4;P34897;A0A024RB99;Q5HYG8;B4DW25;B4E1G2;B4DJQ3;B4DP88;Q5BJF5;B4DJ63;B4DWA7;B4DLV4;H0YIZ0	Serine hydroxymethyltransferase;Serine hydroxymethyltransferase, mitochondrial	HEL-S-51e;SHMT2;DKFZp686P09201	92	92	0
Q9NPJ3	Acyl-coenzyme A thioesterase 13;Acyl-coenzyme A thioesterase 13, N-terminally processed	ACOT13	92	92	0
Q96DV6;A2A3R6;P62753;A2A3R5	40S ribosomal protein S6	RPS6	92	92	0
Q15084	Protein disulfide-isomerase A6	PDIA6	92	92	0
P27824	Calnexin	CANX	92	92	0
J3KTL2;Q07955;Q59FA2;A8K1L8	Serine/arginine-rich splicing factor 1	SRSF1	92	92	0
E5KS60;Q9P2R7;Q6N0B1;Q5T9Q5	Succinyl-CoA ligase subunit beta;Succinyl-CoA ligase [ADP-forming] subunit beta, mitochondrial	SUCLA2;DKFZp686D0880	92	92	0
A0A024R5Z9;H3BTN5;B4DRT3;Q504U3;H3BR70;A0A024R609;H3BQ34	Pyruvate kinase	PKM2;PKM	92	92	0
A8K7F6;P60842;A8K088;J3KT12;Q59F68;J3KTB5;J3QS69;J3QL43;B4DNH2;J3QR64	Eukaryotic initiation factor 4A-I	EIF4A1	92	92	0
E9KL44;P40939;B4DRH6;B4DDZ5	Trifunctional enzyme subunit alpha, mitochondrial;Long-chain enoyl-CoA hydratase;Long chain 3-hydroxyacyl-CoA dehydrogenase	HADHA	92	92	0
Q53GL5;P48735;Q13584;B4DSZ6	Isocitrate dehydrogenase [NADP], mitochondrial;Isocitrate dehydrogenase [NADP]	IDH2	92	92	0
Q6ZN40		TPM1	92	92	0
Q96IX5	Up-regulated during skeletal muscle growth protein 5	USMG5	92	92	0
A0A024RDW8;P08572;B4DH43	Collagen alpha-2(IV) chain;Canstatin	COL4A2	92	92	0
P62424;Q5T8U3	60S ribosomal protein L7a	RPL7A	92	92	0
A0A024QZT0;P45880;A0A0A0MR02;A0A024QZN9;B4DKM5;Q5JSD1	Voltage-dependent anion-selective channel protein 2	VDAC2	92	92	0
E9PAV3	Nascent polypeptide-associated complex subunit alpha, muscle-specific form	NACA	92	92	0
Q8TBK5;Q8N5Z7;A0A024RBK3;Q9HBB3;Q02878;B4DRX3	60S ribosomal protein L6	RPL6	92	92	0
P09382	Galectin-1	LGALS1	92	92	0
V5T7C5;O75112;B4DGP4;A0A0S2Z501	LIM domain-binding protein 3	LDB3	92	92	0
Q2TB59;A0A024R0C3;Q13423	NAD(P) transhydrogenase, mitochondrial	NNT	92	92	0
V9HW22;P11142;E9PKE3;Q53GZ6;Q96IS6;B3KTV0;E9PNE6;Q53HF2;A8K7Q2	Heat shock cognate 71 kDa protein	HEL-S-72p;HSPA8	92	92	0
B2R4R9;P62857	40S ribosomal protein S28	RPS28	92	92	0
B7Z992;B7Z2X4			92	92	0
Q9UBY9;D3YTC6;Q68DG0;Q7Z3C1;Q8N241;B3KQL3	Heat shock protein beta-7	HSPB7;DKFZp779D0968;DKFZp686A14192	92	92	0
P62851	40S ribosomal protein S25	RPS25	92	92	0
V9HWF4;P00558;B4E1H9	Phosphoglycerate kinase;Phosphoglycerate kinase 1	HEL-S-68p;PGK1	92	92	0
A0A109NGN6;P28066;Q5U0A0	Proteasome subunit alpha type-5;Proteasome subunit alpha type	PSMA5	92	92	0
P02545;Q5I6Y5;Q8N519	Prelamin-A/C;Lamin-A/C	LMNA	92	92	0
A0A0S2Z487;A0A024R1X8;P14923	Junction plakoglobin	JUP	92	92	0
P55084;B4DY96;F5GZQ3;B4DDC9;B5MD38;D6W539	Trifunctional enzyme subunit beta, mitochondrial;3-ketoacyl-CoA thiolase	HADHB	92	92	0
B3KX72;Q00839;Q96BA7;B4DLR3;Q7Z4Q5	Heterogeneous nuclear ribonucleoprotein U	HNRNPU;HNRPU	92	92	0
E5KRK5;P28331;B4DJ81	NADH-ubiquinone oxidoreductase 75 kDa subunit, mitochondrial	NDUFS1	92	92	0
P06732;B2R892;B4DUP1	Creatine kinase M-type;Creatine kinase M-type, N-terminally processed	CKM	92	92	0
A0A0S2Z3L2;P16615;H7C5W9	Sarcoplasmic/endoplasmic reticulum calcium ATPase 2	ATP2A2	92	92	0
A0A024RB14;P62854;Q75MH1;Q5JNZ5	40S ribosomal protein S26;Putative 40S ribosomal protein S26-like 1	RPS26;RPS26P11	92	92	0
V9HW43;P04792;B4DL87	Heat shock protein beta-1	HEL-S-102;HSPB1	92	92	0
A0A024R7J0;P17612;A8K8B9;Q15136;K7ERP6	cAMP-dependent protein kinase catalytic subunit alpha	PRKACA;KIN27	92	92	0
B2R659;A0A0S2Z4J1;P51659;E7EWE5;B4DSD0;B4DDM5;E7ER27;G5E9S2;E7ET17;B4DI68;B3KSP2	Peroxisomal multifunctional enzyme type 2;(3R)-hydroxyacyl-CoA dehydrogenase;Enoyl-CoA hydratase 2	HSD17B4	92	92	0
A0A024R3Q3;A0A024R0Y6;P84077;P61204;F5H423;B4E190;B4DN70;B4DEB9;B4DJC8	ADP-ribosylation factor 1;ADP-ribosylation factor 3	ARF1;ARF3	92	92	0
A0A087X0S5;P12109;Q8TBN2	Collagen alpha-1(VI) chain	COL6A1	92	92	0
P11216;Q59GM9;B4DSD8	Glycogen phosphorylase, brain form;Alpha-1,4 glucan phosphorylase	PYGB	92	92	0
A0A024R3X4;P10809;B3GQS7;B7Z597;B7Z5E7;B7Z4F6	60 kDa heat shock protein, mitochondrial	HSPD1	92	92	0
P22695;H3BRG4;H3BSJ9;H3BP04	Cytochrome b-c1 complex subunit 2, mitochondrial	UQCRC2	92	92	0
A0A0K0K1H7;A2A274;Q99798;B4DZ08;B2RBW5;B4DJW1;B4DW08	Aconitate hydratase, mitochondrial	ACO2	92	92	0
V9HWG9;B2R983;P78417;Q5TA02	Glutathione S-transferase omega-1	HEL-S-21;GSTO1	92	92	0
H7BZE4		MYL7	92	92	0
A0A024R9D7;Q16698	2,4-dienoyl-CoA reductase, mitochondrial	DECR1	92	92	0
A0A024R7A8;P15121;Q59EL5;E9PCX2	Aldose reductase	AKR1B1	92	92	0
A8K5I0;A0A0G2JIW1;P0DMV9;P0DMV8;B4DNT8;B4DWK5;Q59EJ3;B4DFN9;B4DI39;B4E1S9;B4E388;B4DVU9;V9GZ37;B3KTT5;B4DNX1;B4E1T6	Heat shock 70 kDa protein 1B;Heat shock 70 kDa protein 1A	HEL-S-103;HSPA1B;HSPA1A	92	92	0
B2R5R5;P46976;G5E9W8;B4DSX6;C9JQ42;Q8N5Y3	Glycogenin-1	GYG1	92	92	0
A0A0S2Z422;A0A0A0MT83;P26440;A0A0S2Z4K7;H0YLC3;H7C4G6	Isovaleryl-CoA dehydrogenase, mitochondrial	IVD	92	92	0
V9HWC1;P12882	Myosin-1	HEL71;MYH1	92	92	0
A0A024R4F1;P06733;E2DRY6	Alpha-enolase;Enolase	ENO1	92	92	0
A8K9T3;P33121;E7EPM6;B4E0R0;B7Z3Z9	Long-chain-fatty-acid--CoA ligase 1	ACSL1	92	92	0
A0A0S2Z4G6;D9YZV4;P09493;H0YL52	Tropomyosin alpha-1 chain	TPM1	92	92	0
Q6P6D7;Q6FHU2;P18669;Q53G35;Q6FHK8;B4DKL5;B4DMJ7	Phosphoglycerate mutase 1;Phosphoglycerate mutase	PGAM1;hCG_2015269	92	92	0
Q6IAL5;A8K4W7;P53597;B2R8A1;B7Z438	Succinyl-CoA ligase [ADP/GDP-forming] subunit alpha, mitochondrial	SUCLG1	92	92	0
O94875;B7Z997	Sorbin and SH3 domain-containing protein 2	SORBS2	92	92	0
A0A024R7F1;K7ELL7;B4DJQ5;P14314;A0A0S2Z4D8;A0A0S2Z4W7;A2VCQ4;A0A0S2Z4A0	Glucosidase 2 subunit beta	PRKCSH	92	92	0
P62269	40S ribosomal protein S18	RPS18	92	92	0
O75306;B7Z792;Q53HG2;B7Z9L2	NADH dehydrogenase [ubiquinone] iron-sulfur protein 2, mitochondrial	NDUFS2	92	92	0
Q6IBR0;P04843;Q96HX3;Q53EP4;B4DL99;B7Z4L4;B4DNJ5	Dolichyl-diphosphooligosaccharide--protein glycosyltransferase subunit 1	RPN1	92	92	0
V9HWG3;P21980;B4DIT7;B4DTN7	Protein-glutamine gamma-glutamyltransferase 2	HEL-S-45;TGM2	92	92	0
I3L1P8;Q6IBH0;Q02978	Mitochondrial 2-oxoglutarate/malate carrier protein	SLC25A11	92	92	0
O75489;Q53FM7;Q9UF24	NADH dehydrogenase [ubiquinone] iron-sulfur protein 3, mitochondrial	NDUFS3;DKFZp586K0821	92	92	0
V9HW98;P62258;G9K389;G9K388;B4DJB0;B4DJF2;I3L3T1	14-3-3 protein epsilon	HEL2;YWHAE;YWHAE/FAM22B fusion;YWHAE/FAM22A fusion	92	92	0
V9HWA6;P60981;F6RFD5;B7Z9M9	Destrin	HEL32;DSTN	92	92	0
K9JA46;P07900;Q2VPJ6;Q8TBA7;Q86U12;O75322;Q96HX7	Heat shock protein HSP 90-alpha	EL52;HSP90AA1	92	92	0
Q7Z4X2;Q9NX14	NADH dehydrogenase [ubiquinone] 1 beta subcomplex subunit 11, mitochondrial	NDUFB11	92	92	0
A0A024R040;P55809;Q6IAV5;E9PDW2;B7Z609	Succinyl-CoA:3-ketoacid-coenzyme A transferase;Succinyl-CoA:3-ketoacid coenzyme A transferase 1, mitochondrial	OXCT1;OXCT	92	92	0
B3KXY9	Hexokinase		92	92	0
B4DJV2;A0A024RB75;O75390;B3KTN4;A0A0C4DGI3	Citrate synthase;Citrate synthase, mitochondrial	CS	92	92	0
P20674;H3BRM5;H3BV69;H3BNX8	Cytochrome c oxidase subunit 5A, mitochondrial	COX5A	92	92	0
A0A0S2Z3L0;P13804;A0A0S2Z3M4;H0YLU7;H0YKF0;H0YL12;H0YK49;H0YNX6	Electron transfer flavoprotein subunit alpha, mitochondrial	ETFA	92	92	0
P52272;A0A087X0X3;Q59ES8;Q7KYM9	Heterogeneous nuclear ribonucleoprotein M	HNRNPM;ORF	92	92	0
E9PK01;P29692;A0A087X1X7;Q71RH4;Q9H7G6;D3DWK1;B2RAR6;E9PRY8;E9PPR1;E9PL12;E9PQ49;E9PI39;E9PMW7;E9PIZ1;H0YCK7;E9PQZ1	Elongation factor 1-delta	EEF1D	92	92	0
F8W6I7;A0A024RB53;A0A024RAZ7;P09651;A0A024RC46;Q6IPF2;Q9BSM5;Q0VAC0;F8VZ49;A0A024QZ98;Q32P51;F8VTQ5;B4DP35;B4E0B5	Heterogeneous nuclear ribonucleoprotein A1;Heterogeneous nuclear ribonucleoprotein A1, N-terminally processed;Heterogeneous nuclear ribonucleoprotein A1-like 2	HNRNPA1;HNRPA1;hCG_2020860;RP11-78J21.1;HNRNPA1L2	92	92	0
Q7Z4Y4;Q9UIJ7;Q7Z531	GTP:AMP phosphotransferase AK3, mitochondrial	AK3	92	92	0
V9HW12;P32119;B4DF70;A6NIW5	Peroxiredoxin-2	HEL-S-2a;PRDX2	92	92	0
A0A024RDF4;A0A024RDF3;Q14103;H0Y8G5;D6RAF8	Heterogeneous nuclear ribonucleoprotein D0	HNRPD;HNRNPD	92	92	0
V9HW26;P25705	ATP synthase subunit alpha;ATP synthase subunit alpha, mitochondrial	HEL-S-123m;ATP5A1	92	92	0
Q53FC7;B2R6X5;P17066;B3KSM6;P48741	Heat shock 70 kDa protein 6;Putative heat shock 70 kDa protein 7	HSPA6;HSPA7	92	92	0
A0A024R6W0;P00505;B3KUZ8;A8K482	Aspartate aminotransferase;Aspartate aminotransferase, mitochondrial	GOT2	92	92	0
A8K4Z4;A0A024RBS2;P05388;Q6NSF2;F8VWS0;Q53HW2;Q53HK9;F8VU65;F8VPE8;G3V210;F8VW21;F8VQY6;F8VRK7;F8VZS0;B4E3D5;Q8NHW5;F8VS58	60S acidic ribosomal protein P0;60S acidic ribosomal protein P0-like	RPLP0;RPLP0P6	92	92	0
A0A024R324;P61586;B4DKN9;Q9BVT0	Transforming protein RhoA	RHOA;ARHA	92	92	0
P05091;Q53FB6;B4YAH7	Aldehyde dehydrogenase, mitochondrial	ALDH2	92	92	0
A0A024R2Q5;P08590	Myosin light chain 3	MYL3	92	92	0
A0A0S2Z4G7;A0A0S2Z491;P06748;A0A140VJQ2;A4ZU86;Q9BTI9	Nucleophosmin	NPM1	92	92	0
Q92522	Histone H1x	H1FX	92	92	0
B4DJB4;P50213;H0YL72;B4DSY4;B7Z9J8;H0YMU3	Isocitrate dehydrogenase [NAD] subunit, mitochondrial;Isocitrate dehydrogenase [NAD] subunit alpha, mitochondrial	IDH3A	92	92	0
P28074;A0A140VJS7	Proteasome subunit beta type-5	PSMB5	92	92	0
S4R371;P05413;Q6IBD7;S4R3A2	Fatty acid-binding protein, heart	FABP3	92	92	0
P62917;B4DVG7;E9PKZ0;G3V1A1;E9PKU4	60S ribosomal protein L8	RPL8	92	92	0
Q5JP53;Q5SU16;P07437;B7ZAF0;Q6LC01;B4DY90;Q5ST81;B7ZAK1;Q9BUU9;B4E052;B4DMU8;Q96B85;B4DXZ5;Q1KSF8	Tubulin beta chain	TUBB;XTP3TPATP1	92	92	0
B5MDF5;P62826;J3KQE5;F5H018;H0YFC6	GTP-binding nuclear protein Ran	RAN	92	92	0
V9HW31;P06576;Q0QEN7;H0YH81;F8W079	ATP synthase subunit beta;ATP synthase subunit beta, mitochondrial	HEL-S-271;ATP5B	92	92	0
Q13011;M0R248	Delta(3,5)-Delta(2,4)-dienoyl-CoA isomerase, mitochondrial	ECH1	92	92	0
P31947	14-3-3 protein sigma	SFN	92	92	0
P35609;B7Z2N5;B7Z4P6;Q59FD9;B7Z4K1;F6THM6	Alpha-actinin-2	ACTN2	92	92	0
P13533	Myosin-6	MYH6	92	92	0
CON__P02768-1;P02768;A0A0C4DGB6;Q56G89;B2RBS8;B4DPP6;A8K9P0;B4DPR2;B7WNR0;H0YA55;C9JKR2;A0A087WWT3	Serum albumin	ALB	92	92	0
Q53G71;V9HW88;P27797;B4DHR1;K7EJB9;B4E2Y9	Calreticulin	HEL-S-99n;CALR	92	92	0
Q75MT9;Q6FHZ0;A0A024R4K3;P40926;Q0QF37;G3XAL0;B3KTM1	Malate dehydrogenase;Malate dehydrogenase, mitochondrial	MDH2	92	92	0
P50990;Q53HU0;Q7Z759	T-complex protein 1 subunit theta	CCT8	92	92	0
B2R4R0;P62805;Q0VAS5	Histone H4	HIST1H4H;HIST1H4A	92	92	0
Q6FGX9;Q53EY8;Q5T9B7;P00568;H0Y4J6	Adenylate kinase isoenzyme 1	AK1	92	92	0
Q01813;Q8WTZ9	ATP-dependent 6-phosphofructokinase, platelet type	PFKP	92	92	0
Q53SB5;A5Z217;P17661;Q45VM8;Q45VM7;Q45VM6;Q9H319;L7RDA5;B4DUI0	Desmin	tmp_locus_29;DES	92	92	0
O75323	Protein NipSnap homolog 2	GBAS	92	92	0
V9HWN7;P04075;J3KPS3;H3BQN4;H3BPS8;H3BUH7;A0A0M4FNU3;H3BR04;H3BMQ8	Fructose-bisphosphate aldolase;Fructose-bisphosphate aldolase A	HEL-S-87p;ALDOA	92	92	0
P07737;K7EJ44	Profilin-1	PFN1	92	92	0
A0A024RD80;P08238;B4DMA2;B4DGL0	Heat shock protein HSP 90-beta	HSP90AB1	92	92	0
Q5QNZ2;Q08ET0;A8K4W2;P24539;Q53GB3	ATP synthase F(0) complex subunit B1, mitochondrial	ATP5F1;hCG_39985	92	92	0
B4DDX2;Q07666;B4E043;B2R7B5	KH domain-containing, RNA-binding, signal transduction-associated protein 1	KHDRBS1	92	92	0
P61604;Q9UNM1;B8ZZL8;A0A024R3X7	10 kDa heat shock protein, mitochondrial	HSPE1;EPFP1	92	92	0
Q5VTE0;Q6IPT9;Q6IPS9;Q6IPN6;Q53HM9;P68104;A8K9C4;Q53HR5;Q53HQ7;Q53GA1;Q53G85;Q96RE1;A0A087WVQ9;B4DV42;A0A087WV01;Q9H2I7;Q53G89;Q8IUB0;Q53HR1;B4DNE0;Q504Z0;B4E2C5;Q16577	Putative elongation factor 1-alpha-like 3;Elongation factor 1-alpha;Elongation factor 1-alpha 1	EEF1A1P5;EEF1A1;EEF1A1L14;PTI-1	92	92	0
Q5U077;P07195;A8MW50;C9J7H8	L-lactate dehydrogenase;L-lactate dehydrogenase B chain	LDHB	92	92	0
A0A0U1RQK4			92	92	0
P38159;H3BT71;H0Y6E7;B4E352;B3KRG5;H3BUY5	RNA-binding motif protein, X chromosome;RNA-binding motif protein, X chromosome, N-terminally processed	RBMX	92	92	0
P42126;Q96DC0;H3BS70	Enoyl-CoA delta isomerase 1, mitochondrial	ECI1;DCI	92	92	0
A8K525;A0A0S2Z4Z9;Q15233;H7C367;C9JYS8	Non-POU domain-containing octamer-binding protein	NONO	92	92	0
Q5TEC6	Histone H3	HIST2H3PS2	92	92	0
Q06830;B2R4P2	Peroxiredoxin-1	PRDX1	92	92	0
B0ZBD0;Q8WVX7;P39019;A0A075B6E2	40S ribosomal protein S19	RPS19	92	92	0
P10606;Q6FHM4;Q6FHJ9	Cytochrome c oxidase subunit 5B, mitochondrial	COX5B	92	92	0
P12883;Q59EV3;Q5GJ54	Myosin-7	MYH7	92	92	0
D9ZGF2;P12111	Collagen alpha-3(VI) chain	COL6A3	92	92	0
V9HVZ4;P04406;Q2TSD0;E7EUT5;Q0QET7	Glyceraldehyde-3-phosphate dehydrogenase	HEL-S-162eP;GAPDH	92	92	0
Q8NCF7;B2RE88;A0A024RBE8;A0A024RBH9;Q00325;F8VVM2;Q53HC3	Phosphate carrier protein, mitochondrial	SLC25A3	92	92	0
Q71DI3;P68431;B4E380;K7EK07;B2R4P9;P84243;K7EMV3;B4DEB1;B2R6Y1;A8K4Y7;K7ES00;Q6NXT2	Histone H3.2;Histone H3.1;Histone H3;Histone H3.3;Histone H3.3C	HIST2H3A;HIST1H3A;H3F3B;H3F3A;H3F3C	92	92	0
Q8IZ29;P68371;Q8N6N5;Q8IWP6;B3KML9;Q96HX0	Tubulin beta-4B chain	TUBB2C;TUBB4B	92	92	0
A0A0S2Z4C3;P07954	Fumarate hydratase, mitochondrial	FH	92	92	0
P48047;Q53HH2;H7C0C1	ATP synthase subunit O, mitochondrial	ATP5O	92	92	0
P02458	Collagen alpha-1(II) chain;Collagen alpha-1(II) chain;Chondrocalcin	COL2A1	92	92	0
Q4VB24;A3R0T8;P10412;B2R984;A3R0T7	Histone H1.4	HIST1H1E	92	92	0
Q9BVA1	Tubulin beta-2B chain	TUBB2B	92	92	0
P42766;F2Z388;A4D2M5;A0A024R866	60S ribosomal protein L35	RPL35;LOC154880	92	92	0
V9HW27;P02511;E9PR44;A0A140G961;C3VMY8;A0A024R3B9;E9PNH7	Alpha-crystallin B chain	HEL-S-101;CRYAB	92	92	0
P49748;Q53HR2;B4DEA8;B3KPA6;B3KPX1	Very long-chain specific acyl-CoA dehydrogenase, mitochondrial	ACADVL	92	92	0
P11055;Q5GJ67	Myosin-3	MYH3	92	92	0
P22626;A0A087WUI2;A0A024RA28;I6L957	Heterogeneous nuclear ribonucleoproteins A2/B1	HNRNPA2B1;HNRPA2B1	92	92	0
A0A024RAD8;P30038	Delta-1-pyrroline-5-carboxylate dehydrogenase, mitochondrial	ALDH4A1	92	92	0
P05141;Q6NVC0	ADP/ATP translocase 2;ADP/ATP translocase 2, N-terminally processed	SLC25A5	92	92	0
A0A024R9Z0;O00483	Cytochrome c oxidase subunit NDUFA4	NDUFA4	92	92	0
P13073;H3BN72;H3BNV9;H3BPG0;Q86WV2	Cytochrome c oxidase subunit 4 isoform 1, mitochondrial	COX4I1	92	92	0
P61981;B3KNB4;B4DE78;B4DHC4	14-3-3 protein gamma;14-3-3 protein gamma, N-terminally processed	YWHAG	92	92	0
D0PNI1;P63104;E7EX29;B0AZS6;B7Z2E6;H0YB80;E7ESK7	14-3-3 protein zeta/delta	YWHAZ	92	92	0
P36578;Q53G74;B4DMJ6;H3BM89;B4DFI6;B4DMJ2	60S ribosomal protein L4	RPL4	92	92	0
V9HWF2;P40925;B9A041;B8ZZ51;C9JF79	Malate dehydrogenase;Malate dehydrogenase, cytoplasmic	HEL-S-32;MDH1	92	92	0
Q6I9V5;P12236;Q59EI9	ADP/ATP translocase 3;ADP/ATP translocase 3, N-terminally processed	SLC25A6	92	92	0
V9HWB9;P00338;B4DJI1;F5GYU2;F5GXY2	L-lactate dehydrogenase;L-lactate dehydrogenase A chain	HEL-S-133P;LDHA	92	92	0
A0A1C7CYY4;P12829;I3L1K6;I3L532;I3L3U1	Myosin light chain 4	MYL4	92	92	0
P07305	Histone H1.0;Histone H1.0, N-terminally processed	H1F0	92	92	0
A0A024R6D4;P84090;G3V279	Enhancer of rudimentary homolog	ERH	92	92	0
E9PN17;O75964	ATP synthase subunit g, mitochondrial	ATP5L	92	92	0
V9HWK1;P60174;Q53HE2;B4DUI5;U3KPZ0	Triosephosphate isomerase	HEL-S-49;TPI1	92	92	0
P68032;D2JYH4;A8K3K1;P62736;P63267;B3KW67;Q13707	Actin, alpha cardiac muscle 1;Actin, aortic smooth muscle;Actin, gamma-enteric smooth muscle	ACTC1;ACTA2;ACTG2	92	92	0
B2R4S9;P62807;A0A024RCL8;O60814;P57053;Q0D2M2	Histone H2B;Histone H2B type 1-C/E/F/G/I;Histone H2B type 1-K;Histone H2B type F-S	HIST1H2BI;HIST1H2BC;HIST1H2BK;H2BFS	92	92	0
A0A024QZF6;Q96B36;M0R2V8;H9KV91	Proline-rich AKT1 substrate 1	AKT1S1	1	0	-1
A8K3Y8;Q9Y316	Protein MEMO1	MEMO1	1	0	-1
B1AKB5;A0A024RCY3;B4DPL3;B0QYS6;B0QYS7;P19484	Transcription factor EB	TFEB	1	0	-1
B4DN67;Q96J84	Kin of IRRE-like protein 1	KIRREL	1	0	-1
B4E086;Q8NBT2	Kinetochore protein Spc24	SPC24	1	0	-1
H0Y8P4;Q8TED0	U3 small nucleolar RNA-associated protein 15 homolog	UTP15	1	0	-1
H3BRL9;E5KTI5;P78549	Endonuclease III-like protein 1	NTHL1	1	0	-1
H3BRW3;H3BRD2;P55789	Sulfhydryl oxidase;FAD-linked sulfhydryl oxidase ALR	GFER	1	0	-1
J3KN36;P69849;Q5JPE7;Q1LZN2	Nodal modulator 3;Nodal modulator 2	NOMO3;NOMO2	1	0	-1
Q7Z344;H0Y931;H0Y8Y2		DKFZp686M09125;ANK2	1	0	-1
Q8N0V3	Putative ribosome-binding factor A, mitochondrial	RBFA	1	0	-1
Q9Y547	Intraflagellar transport protein 25 homolog	HSPB11	1	0	-1
X6R5E5;B7Z6T7;A8K2S7;A0A024RE02;Q8NBM4;B3KW74	Ubiquitin-associated domain-containing protein 2	UBAC2;PHGDHL1	1	0	-1
K7EPU3;Q9BT22	Chitobiosyldiphosphodolichol beta-mannosyltransferase	ALG1	2	1	-1
O43752	Syntaxin-6	STX6	2	1	-1
B2R5U7;Q03701	CCAAT/enhancer-binding protein zeta	CEBPZ	2	1	-1
A0A024R8B2;P62166	Neuronal calcium sensor 1	FREQ;NCS1	2	1	-1
P80217	Interferon-induced 35 kDa protein	IFI35	2	1	-1
Q5SZR4;B3KPI5;B4DZR8;F6TB26;Q9Y2W6	Tudor and KH domain-containing protein	TDRKH	2	1	-1
U3KQF4;K7EIY6;A0A024R206;Q9BV68;A8K0Q1	E3 ubiquitin-protein ligase RNF126	RNF126	2	1	-1
Q96EV2;H7BXM6;A8MTF7;H7C0H2;H0Y3K4	RNA-binding protein 33	RBM33	2	1	-1
B4DGA3;E7EPS8;P28827;J3KRV2;B4E143	Protein-tyrosine-phosphatase;Receptor-type tyrosine-protein phosphatase mu	PTPRM	2	1	-1
J3QQQ3;B2RDT9;Q96NB3	Zinc finger protein 830	ZNF830	2	1	-1
Q05CW4;O96028;H0Y9L4;D6R9V2	Histone-lysine N-methyltransferase NSD2	WHSC1	2	1	-1
A0A024R134;F8W126;Q96EZ8	Microspherule protein 1	MCRS1	2	1	-1
A0A087X0M4;A0A087WWF4;B4DV74;Q9BWU0	Kanadaptin	SLC4A1AP	3	2	-1
B4E2K2			3	2	-1
Q5SV97	PGC-1 and ERR-induced regulator in muscle protein 1	PERM1	3	2	-1
B3KTH1;G3V1S1;Q53HW5;A8K359;P19447	TFIIH basal transcription factor complex helicase XPB subunit	ERCC3	3	2	-1
A0A0U4BW16			3	2	-1
B4DVR4;Q9BT70		SORBS3	3	2	-1
B4E2N9;B4DJ11;B4E2I2;A0A0A0MSU4;A0A024R8L6;O94911	ATP-binding cassette sub-family A member 8	ABCA8	3	2	-1
A0A024R8F5;Q9UHF1	Epidermal growth factor-like protein 7	EGFL7	3	2	-1
S4R360;J3KPP0;A0A024RBG3;S4R2Z7;Q9Y6G3	39S ribosomal protein L42, mitochondrial	MRPL42	3	2	-1
B7Z4X0;F8W922;B7Z1P9;A0A024R8B8;Q9H7P6	Multivesicular body subunit 12B	MVB12B;C9orf28	3	2	-1
C7DUW4;Q6FI23;Q6FHG1;Q53EZ9;P46734	Dual specificity mitogen-activated protein kinase kinase 3	MAP2K3	3	2	-1
B4DNL8;G3V150;Q5U676;O94766;E9PNA1	Galactosylgalactosylxylosylprotein 3-beta-glucuronosyltransferase 3	B3GAT3	3	2	-1
Q8N6L1	Keratinocyte-associated protein 2	KRTCAP2	3	2	-1
A0A024R5P6;Q9BSY9	Desumoylating isopeptidase 2	C1orf121;DESI2	3	2	-1
O43617;A0A087WWM0;A0A087WYS5	Trafficking protein particle complex subunit 3	TRAPPC3	3	2	-1
F5GYJ5;Q9NX18;F8W679;M0QYN2;F5GXW4;M0R060;F5H5T6	Succinate dehydrogenase assembly factor 2, mitochondrial	SDHAF2	4	3	-1
P05164	Myeloperoxidase;Myeloperoxidase;89 kDa myeloperoxidase;84 kDa myeloperoxidase;Myeloperoxidase light chain;Myeloperoxidase heavy chain	MPO	4	3	-1
O94888;F8WB69;C9JD50	UBX domain-containing protein 7	UBXN7	4	3	-1
A0A024RDI0;Q8IZQ1	WD repeat and FYVE domain-containing protein 3	WDFY3	4	3	-1
Q8N3Y1	F-box/WD repeat-containing protein 8	FBXW8	4	3	-1
Q9NZQ3;H7C2K2;C9JSC3	NCK-interacting protein with SH3 domain	NCKIPSD	4	3	-1
A0A0A0MQZ4;Q8N3J5;V9GY69	Protein phosphatase 1K, mitochondrial	PPM1K	4	3	-1
H0YBC7;B4DTN1;Q6IBV1;Q9H3K3;O60238	BCL2/adenovirus E1B 19 kDa protein-interacting protein 3-like	BNIP3L	4	3	-1
B1AKP2;B1AKP1;B2RD31;O60636	Tetraspanin;Tetraspanin-2	TSPAN2	4	3	-1
B2RCC2;Q9Y2T7	Y-box-binding protein 2	YBX2	4	3	-1
A8K5B0;A0A024RCF9;Q9UH62	Armadillo repeat-containing X-linked protein 3	ARMCX3	4	3	-1
X5DQZ7		GPX1	4	3	-1
Q6IEH8;Q6KC79;A8K2T2;A6QL62	Nipped-B-like protein	NIPBL	5	4	-1
Q5QPM9;Q5QPM7;A0A140VJT2;Q92530;H0Y555;B4DXW9;B4DUJ0;B4DFK1	Proteasome inhibitor PI31 subunit	PSMF1	5	4	-1
Q1ZYL7;A8K8Y1;B3KUV6;O15488	Glycogenin-2	GYG2	5	4	-1
Q2TSD3;L7RSM7;P17252;Q59FI5;A0A169TED2;J3KRN5;P05771	Protein kinase C;Protein kinase C alpha type;Protein kinase C beta type	PRKCA;PRKCB	5	4	-1
Q9UPY3	Endoribonuclease Dicer	DICER1	6	5	-1
A0A140VJG7;A0A024RDW5;B4DG73;Q9Y2V7	Conserved oligomeric Golgi complex subunit 6	COG6	6	5	-1
C9JEG4;H7C482		MYL7	6	5	-1
Q9HAL1;Q96I49;Q6YL38;B7Z267;Q6ZNJ9;B2R6P1;A0A1A7UP97;P34059	N-acetylgalactosamine-6-sulfatase	GALNS;FLJ00319	6	5	-1
Q53RX8;E9PCS8;E7EQY4;D6W5A2;E7EV10;Q9BTC8	Metastasis-associated protein MTA3	tmp_locus_6;MTA3	6	5	-1
A8K8K1;O00442;B4DSL0	RNA 3-terminal phosphate cyclase	RTCA	6	5	-1
B3KXX7;H0Y4Z8;Q3YEC7;H0Y7H6;G3V154;B3KSV0;F2Z2T0;Q9NWD6;Q9NW45;A0A0X1KG72	Rab-like protein 6	RABL6	6	5	-1
G5E9L9;A0A0U1RR70;Q8N568	Serine/threonine-protein kinase DCLK2	DCLK2	6	5	-1
B3KM65;Q59H21;Q9Y2R4	Probable ATP-dependent RNA helicase DDX52	DDX52	6	5	-1
G3V1E0;E9PJM3;Q59GS0;Q9UK99;Q49AF1;B7Z6P8	F-box only protein 3	FBXO3	6	5	-1
W6I206;W8QRJ0;Q9Y4K0	Lysyl oxidase homolog 2	LOXL2	6	5	-1
Q8IWB1;X6RK76	Inositol 1,4,5-trisphosphate receptor-interacting protein	ITPRIP	6	5	-1
CON__Q03247			6	5	-1
A0A024R496;Q9Y376;A0A087X0K1;Q7Z4X0	Calcium-binding protein 39	CAB39	7	6	-1
B3KSN3;Q8N1X3;Q9NUT2	ATP-binding cassette sub-family B member 8, mitochondrial	ABCB8	7	6	-1
Q4KMP7	TBC1 domain family member 10B	TBC1D10B	7	6	-1
B4DMH1;Q9BTA9;C9JD58;J3QTA0	WW domain-containing adapter protein with coiled-coil	WAC	7	6	-1
Q5SZ82;A0A087WXU0;Q9NWS8	Required for meiotic nuclear division protein 1 homolog	RMND1	7	6	-1
G3V235;G3V2Q3;G3V5E1;A0A024R6K1;O75909	Cyclin-K	CCNK	7	6	-1
A0A1B0GVV3;Q5EBL4	RILP-like protein 1	RILPL1	7	6	-1
A2RRP1;G1UI26	Neuroblastoma-amplified sequence	NBAS	7	6	-1
Q53R15;P05976	Myosin light chain 1/3, skeletal muscle isoform	MYL1	8	7	-1
Q12788;A0JLS5;J3KNP2	Transducin beta-like protein 3	TBL3	8	7	-1
Q96KQ4;G3V5J1	Apoptosis-stimulating of p53 protein 1	PPP1R13B	8	7	-1
Q6NSG7;Q3B790		HMGN1	8	7	-1
H0YNN4;H0YNB7;H0YL22;A0A024R9L0;Q9Y375	Complex I intermediate-associated protein 30, mitochondrial	NDUFAF1	8	7	-1
V9HW44;P68402	Platelet-activating factor acetylhydrolase IB subunit beta	HEL-S-303;PAFAH1B2	8	7	-1
E9PGC8;P78559;Q504X9;A8K4T7	Microtubule-associated protein 1A;MAP1A heavy chain;MAP1 light chain LC2	MAP1A	9	8	-1
X1WI28;X5D2T3;P27635;A0A087WV22;X5D7P1	60S ribosomal protein L10	RPL10	9	8	-1
H3BU86;Q59G13;O14662;F8W9Z6;B4E3U3	Syntaxin-16	STX16-NPEPL1;STX16	9	8	-1
P35625;B4DNZ4	Metalloproteinase inhibitor 3	TIMP3	9	8	-1
B4DDW1;F8VQX6;H0YI09;A0A024R118;Q9H8H3	Methyltransferase-like protein 7A	METTL7A	9	8	-1
E9PJB2;E9PPG8;Q53FT3	Protein Hikeshi	C11orf73	9	8	-1
F8VZX7;F8W056;A8MVZ6;Q96G01	Protein bicaudal D homolog 1	BICD1	9	8	-1
Q14676;B4DYH4	Mediator of DNA damage checkpoint protein 1	MDC1	10	9	-1
B4E397;B4DNS6;B7ZB68;B4DV72;Q8N4S1;A0A024RDE1;Q14515	SPARC-like protein 1	SPARCL1	10	9	-1
CON__O95678;O95678	Keratin, type II cytoskeletal 75	KRT75	10	9	-1
I6L9D1;Q9NRG4;Q05C86;B0R0U3	N-lysine methyltransferase SMYD2	SMYD2	10	9	-1
A0A024R3S1;Q9H425	Uncharacterized protein C1orf198	C1orf198	11	10	-1
Q9UBG0	C-type mannose receptor 2	MRC2	12	11	-1
B7ZLC9;Q8TEQ6;Q58EZ8	Gem-associated protein 5	GEMIN5	12	11	-1
B4DEN5;B3KQQ7;A0A024R5F9;O43505;B4DGI0	Beta-1,4-glucuronyltransferase 1	B3GNT6;B4GAT1	13	12	-1
CON__Q9UE12;CON__Q15323;Q15323	Keratin, type I cuticular Ha1	KRT31	13	12	-1
B3KP95;A8K948;Q9NVH0	Exonuclease 3-5 domain-containing protein 2	EXD2	13	12	-1
A8K245;Q99986;H0YJ50	Serine/threonine-protein kinase VRK1	VRK1	13	12	-1
B3KS71;C9JP16;B3KX16;Q8NB01;B3KME2;O75718;B4DPA3;B3KQR7	Cartilage-associated protein	CRTAP	13	12	-1
Q9UBB6	Neurochondrin	NCDN	13	12	-1
O95613	Pericentrin	PCNT	14	13	-1
Q4KMR3;Q12965	Unconventional myosin-Ie	MYO1E	14	13	-1
B3KT23;A0A024RD83;Q6DKK2;K7EKH7	Tetratricopeptide repeat protein 19, mitochondrial	TTC19	14	13	-1
Q53TC0;B4DL48;E7EWD3;A0A024R3W8;O75077	Disintegrin and metalloproteinase domain-containing protein 23	ADAM23	14	13	-1
A8K646;Q92882	Osteoclast-stimulating factor 1	OSTF1	14	13	-1
A0A024R5F3;H7BXH2;E9PKF6;Q5H9R7;E9PK08;B4DP39;Q7L294;B4DTT7;B4DYU6;H0YEN2;E9PQP7;B4E0C2	Serine/threonine-protein phosphatase 6 regulatory subunit 3	SAPS3;PPP6R3	15	14	-1
O60504;H0YAZ3;H0YB51	Vinexin	SORBS3	16	15	-1
Q58FF8	Putative heat shock protein HSP 90-beta 2	HSP90AB2P	18	17	-1
H0YEJ9;H0YE88;P28347	Transcriptional enhancer factor TEF-1	TEAD1	18	17	-1
Q59E89;Q9UDY4;B4DNN2	DnaJ homolog subfamily B member 4	DNAJB4	18	17	-1
Q86YU5;E7ERS3;B4DTK7;Q86VM9;H3BP01;B4DZ24	Zinc finger CCCH domain-containing protein 18	FLJ00419;ZC3H18	18	17	-1
A0A140VK06;P51689	Arylsulfatase D	ARSD	18	17	-1
B4DPH4;B2R7F8;P00747;Q68DS2;A0A0F7G8J1	Plasminogen;Plasmin heavy chain A;Activation peptide;Angiostatin;Plasmin heavy chain A, short form;Plasmin light chain B	PLG;DKFZp779M0222	19	18	-1
P41226	Ubiquitin-like modifier-activating enzyme 7	UBA7	19	18	-1
O95037;Q6FIF1;Q9UBS3	DnaJ homolog subfamily B member 9	WUGSC:H_RG054D04.3;DNAJB9	19	18	-1
B5MCT7;B3KX06;A0M8Q2;Q6IPC0;P49593;C9J2F3;Q0VGL7;A8MX49	Protein phosphatase 1F	PPM1F	19	18	-1
A0A0C4DGB0;Q9UIL1	Short coiled-coil protein	SCOC	20	19	-1
K7ER15;V9HW73;Q9H0R4;K7EMY7;K7EJQ8;A0A1B0GXB1;K7EQD2	Haloacid dehalogenase-like hydrolase domain-containing protein 2	HDHD2;HEL-S-301	20	19	-1
F8WE41;Q7Z3W9;P52298	Nuclear cap-binding protein subunit 2	NCBP2;DKFZp686G18222	21	20	-1
O00154;B4DUX0;K7EKP8	Cytosolic acyl coenzyme A thioester hydrolase	ACOT7	22	21	-1
E9PMG1;B2R7D3;H0YDT0;Q96D71;H0YCF0;H7C1V2;F2Z3L2	RalBP1-associated Eps domain-containing protein 1	REPS1	23	22	-1
H7C2T5;A8K3W7;Q9Y2G5;A0A0C4DGX7	GDP-fucose protein O-fucosyltransferase 2	POFUT2	23	22	-1
E9PKU7;B4DZ53		GANAB	23	22	-1
B7Z9B7			24	23	-1
Q6UW63	KDEL motif-containing protein 1	KDELC1	24	23	-1
B3KQK4;A5PLM9;A0A024R276;P07711;Q5T8F0	Cathepsin L1;Cathepsin L1 heavy chain;Cathepsin L1 light chain	CTSL1;CTSL	24	23	-1
B3KY79;CON__Q3KNV1;CON__P08729;P08729;CON__Q9DCV7	Keratin, type II cytoskeletal 7	KRT7	25	24	-1
P0DN79;P35520;B7Z6W5;B7Z2D6;Q9NTF0	Cystathionine beta-synthase	CBS;DKFZp727E011	25	24	-1
A0A0S2Z4G8;Q5VU62		TPM3	25	24	-1
B2R4G1;A0A024R2M9;Q9Y241;C9JAW5;C9JNU6	HIG1 domain family member 1A, mitochondrial	HIGD1A	26	25	-1
B4DW13;Q6YP21;A0A0A0MRN7	Kynurenine--oxoglutarate transaminase 3	hCG_23341;CCBL2	26	25	-1
A0A0S2Z4N4;A0A0S2Z4P0;P50479	PDZ and LIM domain protein 4	PDLIM4	26	25	-1
A8K147;P05230;C9JUP6;C9JDC5;Q9UBK1;Q16089;Q6LBM3;B5MCF4	Fibroblast growth factor;Fibroblast growth factor 1	FGF1;FGFA;fgf gene	26	25	-1
B4DPF8;Q96AN5;B4DMR6;B4DMT0	Transmembrane protein 143	TMEM143	28	27	-1
A0A087X0T3		MYH7B	30	29	-1
B4DGH7;Q9UJX6	Anaphase-promoting complex subunit 2	ANAPC2	30	29	-1
Q96BW5	Phosphotriesterase-related protein	PTER	30	29	-1
P10109	Adrenodoxin, mitochondrial	FDX1	30	29	-1
V9HVY1;P02675;B4E1D3;D3DP13;D6REL8	Fibrinogen beta chain;Fibrinopeptide B;Fibrinogen beta chain	HEL-S-78p;FGB	31	30	-1
Q9UNE7	E3 ubiquitin-protein ligase CHIP	STUB1	32	31	-1
B4E3H8;Q9H8L6;B4DEW5	Multimerin-2	MMRN2	32	31	-1
C9J973;B4DRC8;Q5JS37	NHL repeat-containing protein 3	NHLRC3	32	31	-1
B2R7G6;P49590;B4DDN8;B4DQ67;B4DSY5	Probable histidine--tRNA ligase, mitochondrial	HARS2	33	32	-1
A8K4J5;Q15327	Ankyrin repeat domain-containing protein 1	ANKRD1	35	34	-1
Q6ICJ4;A0A087WY67;Q6IB75;G9J6Q6;G9J6Q5;G9J6Q4;B2R533;P0CG30;P0CG29	Glutathione S-transferase theta-2B;Glutathione S-transferase theta-2	Em:AP000351.3;GSTT2;GSTT2B	36	35	-1
A0A0A0MR33;G3V5T0;A0A0C4DFM0;G3V4T6;G3V267;B2RDN1;O43708	Maleylacetoacetate isomerase	GSTZ1	37	36	-1
Q9Y5U9	Immediate early response 3-interacting protein 1	IER3IP1	38	37	-1
P78318	Immunoglobulin-binding protein 1	IGBP1	38	37	-1
I3L505;A4UCS3	Acyl carrier protein	NDUFAB1	38	37	-1
O60220	Mitochondrial import inner membrane translocase subunit Tim8 A	TIMM8A	39	38	-1
Q5HY81;P11441	Ubiquitin-like protein 4A	UBL4A	40	39	-1
A2ACR1;A0A0G2JJA7;P28065	Proteasome subunit beta type;Proteasome subunit beta type-9	PSMB9	40	39	-1
A0A024QZL0;Q96D05;Q5VVH9	Uncharacterized protein C10orf35	C10orf35	40	39	-1
A0A024R248;Q96LW7	Bcl10-interacting CARD protein	C9orf89	41	40	-1
Q5TAW7;A0A024RDT3;Q9H9S4;B7ZBJ5;B7ZBJ4	Calcium-binding protein 39-like	CAB39L	41	40	-1
B7Z2X0;A0A0G2JQ41;B7Z7Z1;A0A1C7CYZ0;Q12979;Q6ZT60;B7Z683	Active breakpoint cluster region-related protein	ABR	42	41	-1
B2R9V7;A0A140VJU8;P08294	Superoxide dismutase [Cu-Zn];Extracellular superoxide dismutase [Cu-Zn]	SOD3	44	43	-1
B3KU69;Q02108	Guanylate cyclase soluble subunit alpha-3	GUCY1A3	44	43	-1
K7EIN1;K7ESN4;K7EIJ0;K7ENL2;A6NG10;K7EMC9;A0A024R8L1;Q969T9;K7EIK1;B4DFG2;Q7Z511	WW domain-binding protein 2	WBP2	44	43	-1
B2RDN3;Q9Y5Y2;H3BNF0;Q2YS46;H3BRK5;H3BMW1;H3BNS4	Cytosolic Fe-S cluster assembly factor NUBP2	NUBP2;NUBP1	46	45	-1
Q9H993;F5GZY1	Protein-glutamate O-methyltransferase	ARMT1	49	48	-1
B3KQQ9;O95084;B7ZB43;B4E201	Serine protease 23	PRSS23	51	50	-1
M0R116;Q53ES0;B7Z9V4;A0A0A0MT26;P13637;B7Z1Q9;B7Z3F8;B3KV59;B3KSY7	Sodium/potassium-transporting ATPase subunit alpha-3	ATP1A3	52	51	-1
P22612	cAMP-dependent protein kinase catalytic subunit gamma	PRKACG	52	51	-1
Q53GS9;B7Z7L9;A0A087X1B2;B9A018;B3KPG7;B3KMG1	U4/U6.U5 tri-snRNP-associated protein 2	USP39	53	52	-1
O60701	UDP-glucose 6-dehydrogenase	UGDH	55	54	-1
A0A024R7Y9;P61925;B2R4K1	cAMP-dependent protein kinase inhibitor alpha	PKIA	57	56	-1
A0A024RDV8;A8K3Y6;Q15714;A0A087X0H8	TSC22 domain family protein 1	TSC22D1	58	57	-1
A0M8W4;Q15819;G3V113;H0YBP9;H0YBX6	Ubiquitin-conjugating enzyme E2 variant 2	UBE2V2	59	58	-1
B3KNJ3;O43293;B3KSK3	Death-associated protein kinase 3	DAPK3	60	59	-1
B2R8K8;A0A024R964;Q8TDX7	Serine/threonine-protein kinase Nek7	NEK7	61	60	-1
A6NKB8;Q9H4A4;Q7RU04;A0A087WU27	Aminopeptidase B	RNPEP	62	61	-1
Q16740;M0R208	ATP-dependent Clp protease proteolytic subunit, mitochondrial;ATP-dependent Clp protease proteolytic subunit	CLPP	64	63	-1
O75391;I3L0X5	Sperm-associated antigen 7	SPAG7	65	64	-1
B3KM21;Q5RI15	Cytochrome c oxidase protein 20 homolog	FAM36A;COX20	66	65	-1
B4E324;X6R5C5;Q59EV6;X6R8A1;P10619	Carboxypeptidase;Lysosomal protective protein;Lysosomal protective protein 32 kDa chain;Lysosomal protective protein 20 kDa chain	CTSA;PPGB	66	65	-1
Q53F37;Q9Y6B6;D6RD69;Q9H029;D6RDB2	GTP-binding protein SAR1b	SAR1B;DKFZp434B2017	67	66	-1
Q7L523;Q5VZM0	Ras-related GTP-binding protein A	RRAGA;RRAGB	68	67	-1
J3KTI2;Q9BRT3	Migration and invasion enhancer 1	MIEN1	69	68	-1
Q6ZVM7;B7Z8F0;B7Z2U2	TOM1-like protein 2	TOM1L2	70	69	-1
B4DY17;Q96GX9;S4R3D6	Methylthioribulose-1-phosphate dehydratase	APIP	70	69	-1
A0A024R2K4;Q9Y608	Leucine-rich repeat flightless-interacting protein 2	LRRFIP2	71	70	-1
Q9BUL8;C9J5C3;H7C5M9;C9JSA3;C9JND6;C9J363;C9J6F3	Programmed cell death protein 10	PDCD10	71	70	-1
A0A024R1U4;P51148;K7ERI8;F8VVK3;K7ENY4	Ras-related protein Rab-5C	RAB5C	72	71	-1
E5RJI7;Q9BYD1	39S ribosomal protein L13, mitochondrial	MRPL13	74	73	-1
B3KQQ3;O60568;H7C2V1;H7C2S8;Q9UG85	Procollagen-lysine,2-oxoglutarate 5-dioxygenase 3	PLOD3;DKFZp564O1822	74	73	-1
Q08AJ9;A0A024R017;Q93077;Q7L7L0;P04908;Q96QV6	Histone H2A;Histone H2A type 1-C;Histone H2A type 3;Histone H2A type 1-B/E;Histone H2A type 1-A	HIST1H2AB;HIST1H2AC;HIST3H2A;HIST1H2AA	75	74	-1
A0A024R0Q4;Q8IV08;B4DEL6	Phospholipase D3	PLD3	76	75	-1
O95379;B3KUI2;D6RCM8	Tumor necrosis factor alpha-induced protein 8	TNFAIP8	76	75	-1
P82932	28S ribosomal protein S6, mitochondrial	MRPS6	76	75	-1
Q86TC9;A0A087WX60	Myopalladin	MYPN	76	75	-1
A0A024R2F9;Q9BTV4;A0A0S2Z5N2;Q8TEP9	Transmembrane protein 43	TMEM43;FLJ00144	77	76	-1
Q8TE59;B3KV14	A disintegrin and metalloproteinase with thrombospondin motifs 19	ADAMTS19	77	76	-1
A8K2I7;A0A024R7I0;O14908;K7EM11;A0A024R7I1	PDZ domain-containing protein GIPC1	GIPC1	77	76	-1
O00217;A0A024R5K3;E9PPW7;Q53G17;E9PKH6;E9PN51;F8W9K7;B4DYI3	NADH dehydrogenase [ubiquinone] iron-sulfur protein 8, mitochondrial	NDUFS8	78	77	-1
B3KUF6;A0A024R837;Q9BSH5	Haloacid dehalogenase-like hydrolase domain-containing protein 3	HDHD3	79	78	-1
A0A0A6YYL4;P57737;B3KUH7;B3KSY4;B4DKU9	Coronin;Coronin-7	CORO7-PAM16;CORO7;hCG_1787779	79	78	-1
J3KS05;Q6IBN6;P83916;B5MD17;K7ELA4	Chromobox protein homolog 1	CBX1	80	79	-1
Q96RU2;B4E3L3;G3V1N5	Ubiquitin carboxyl-terminal hydrolase 28;Ubiquitin carboxyl-terminal hydrolase	USP28	80	79	-1
Q8IXI2;H7BXZ6	Mitochondrial Rho GTPase 1;Mitochondrial Rho GTPase	RHOT1	80	79	-1
P61960;H0Y614	Ubiquitin-fold modifier 1	UFM1	80	79	-1
Q96K76	Ubiquitin carboxyl-terminal hydrolase 47	USP47	81	80	-1
P0C870;B5MC20;Q9NWJ5	JmjC domain-containing protein 7	JMJD7	81	80	-1
Q6NVY0;A0A024R904;Q9HB71	Calcyclin-binding protein	CACYBP	82	81	-1
A0A024R8T9;O43760;K7ELD9;K7ENG9;K7ELS8	Synaptogyrin;Synaptogyrin-2	SYNGR2	82	81	-1
O14561;H3BNK3	Acyl carrier protein, mitochondrial;Acyl carrier protein	NDUFAB1	83	82	-1
A0A024R0H7;Q9BQA1;H0Y711	Methylosome protein 50	WDR77	83	82	-1
Q8IXI1;I3L2C6;H3BST5	Mitochondrial Rho GTPase 2	RHOT2	83	82	-1
Q9HCB6	Spondin-1	SPON1	83	82	-1
A0A087WUQ6;Q7L4Q3;P07203;Q6NSD4	Glutathione peroxidase;Glutathione peroxidase 1	GPX1	84	83	-1
A0A024RCI6;Q9P291	Armadillo repeat-containing X-linked protein 1	ARMCX1	84	83	-1
B4DKQ5;O60784;B4DJ44;B3KUF5	Target of Myb protein 1	TOM1	84	83	-1
B3KQQ0;A0A090N8P3;O95302;B7Z230;B7Z1U8	Peptidyl-prolyl cis-trans isomerase FKBP9	FKBP9	85	84	-1
Q6IB98;Q53HR0;Q53HG0;B3KS98;O15372;Q5BKY2;A0A087WZK9;E5RJT0	Eukaryotic translation initiation factor 3 subunit H	EIF3S3;EIF3H	85	84	-1
P20290;H0Y9Y1;D6RDG3	Transcription factor BTF3	BTF3	85	84	-1
K7EQ55;K7EK33;A0A0S2Z569;Q96EP5;K7EQ02;Q5IRN2	DAZ-associated protein 1	DAZAP1;DAZAP1/MEF2D fusion	85	84	-1
Q562R1	Beta-actin-like protein 2	ACTBL2	86	85	-1
P78310	Coxsackievirus and adenovirus receptor	CXADR	86	85	-1
B4DLT1;O75436;S4R3Q6	Vacuolar protein sorting-associated protein 26A	VPS26A	86	85	-1
A0A024R1P7;B4E2A6;Q9UH99;B4DIU6;Q6NT72;A8K129	SUN domain-containing protein 2	UNC84B;SUN2	86	85	-1
Q5T440	Putative transferase CAF17, mitochondrial	IBA57	86	85	-1
Q99735	Microsomal glutathione S-transferase 2	MGST2	86	85	-1
Q96AG4	Leucine-rich repeat-containing protein 59	LRRC59	87	86	-1
A0A087X1A5;Q5JW30;A8K622;Q59F99;O95793;B3KRE0	Double-stranded RNA-binding protein Staufen homolog 1	STAU1	87	86	-1
I3L0H8;B4DS24;Q9NUU7	ATP-dependent RNA helicase DDX19A	DDX19A	87	86	-1
Q5T653;C9IY40;B4DVE2	39S ribosomal protein L2, mitochondrial	MRPL2	87	86	-1
A8K964;Q9H307	Pinin	PNN	87	86	-1
B4DPC0;Q9BSL6		LRRFIP1	87	86	-1
X5DQN2;X5D299;P51649;C9J8Q5;A8K435	Succinate-semialdehyde dehydrogenase, mitochondrial	ALDH5A1	87	86	-1
A0A0A0MRK6;Q13505	Metaxin-1	MTX1	87	86	-1
O75475;Q05CM9	PC4 and SFRS1-interacting protein	PSIP1	87	86	-1
V9HW51;B2R960;O43396;Q59G46;K7ER96	Thioredoxin-like protein 1	HEL-S-114;TXNL1	87	86	-1
C9JWC3		SORBS2	87	86	-1
Q5U000;Q9UBR2	Cathepsin Z	CTSZ	87	86	-1
A0A024R4Z6;Q08945	FACT complex subunit SSRP1	SSRP1	88	87	-1
A8K5G0;A0A024R7K0;M0R2Z9;Q8IX01;M0R3F6	SURP and G-patch domain-containing protein 2	SFRS14;SUGP2	88	87	-1
O14744;B2RDD7;G3V580;B4DV00	Protein arginine N-methyltransferase 5;Protein arginine N-methyltransferase 5, N-terminally processed;Protein arginine N-methyltransferase 5	PRMT5	88	87	-1
Q86UT6;B7Z889	NLR family member X1	NLRX1	88	87	-1
Q59E88;Q53G26;Q96EY1;B3KM81	DnaJ homolog subfamily A member 3, mitochondrial	DNAJA3	88	87	-1
Q86UA8;A0A0A0MRP6;B7ZLQ5;P28370;D7EZH4	Probable global transcription activator SNF2L1	SMARCA1	88	87	-1
A6NHQ2	rRNA/tRNA 2-O-methyltransferase fibrillarin-like protein 1	FBLL1	88	87	-1
Q6IBP2;P30519;B3KSE0;A0A087WT44;I3L159;I3L1F5	Heme oxygenase 2	HMOX2	89	88	-1
A4D2J9;Q13554;D3DVK8;Q53H78	Calcium/calmodulin-dependent protein kinase type II subunit beta	CAMK2B	89	88	-1
A8K607;Q9UIA9;E7ESC6;D3DSQ7;B4DSP8	Exportin-7	XPO7	89	88	-1
Q92896;H3BM42	Golgi apparatus protein 1	GLG1	89	88	-1
Q7Z3B7		DKFZp451N061	89	88	-1
Q53Y47;P55822;H7C2G0	SH3 domain-binding glutamic acid-rich protein	SH3BGR	89	88	-1
A0A0S2Z4C6;Q08209;A0A0S2Z4B5;E7ETC2;Q9UMM5	Serine/threonine-protein phosphatase 2B catalytic subunit alpha isoform;Serine/threonine-protein phosphatase	PPP3CA	89	88	-1
A1L0T0;M0R026;Q59GP4	Acetolactate synthase-like protein	ILVBL	89	88	-1
Q59FM5;P29992;K7EL62	Guanine nucleotide-binding protein subunit alpha-11	GNA11	89	88	-1
E9PGT6;B2R8N1;A0A024R4D1;Q99627;H7C3S9	COP9 signalosome complex subunit 8	COPS8	89	88	-1
V9HW95;Q15293;Q5J7V8	Reticulocalbin-1	HEL-S-84;RCN1	89	88	-1
F8W776;Q9H9S3;B3KQ68;Q8TC24	Protein transport protein Sec61 subunit alpha isoform 2	SEC61A2	89	88	-1
A0A087WXP3;E9PEE8;B4E2B8;A8K2N5;P18564	Integrin beta;Integrin beta-6	ITGB6	89	88	-1
B4DTT0;Q7Z3X3;H7C3P4;A8K6V6;A0A024RBC5;F6S8M0;B4E284;P15586;H0YFA9;F5H4C6	N-acetylglucosamine-6-sulfatase	DKFZp686E12166;GNS	89	88	-1
A0A024R9G4;Q9NUQ9;Q68D08	Protein FAM49B	FAM49B;DKFZp686B04128	89	88	-1
P62942;Q5W0X3;A0A087WZM5;Q0VDC6	Peptidyl-prolyl cis-trans isomerase FKBP1A;Peptidyl-prolyl cis-trans isomerase	FKBP1A	89	88	-1
A0A024RAM4;P46821;A2BDK6;Q5H9P1	Microtubule-associated protein 1B;MAP1B heavy chain;MAP1 light chain LC1	MAP1B;DKFZp686F1345	90	89	-1
E9PKP7;P17480;B4DNQ1;A8K962;O00164;Q05BZ1;B4DLB0	Nucleolar transcription factor 1	UBTF	90	89	-1
Q7L775	EPM2A-interacting protein 1	EPM2AIP1	90	89	-1
D3DPU2;B2RDY9;B4DNW7;Q01518;B4DI38;B4DNY3;B4DNA3;B4DUZ8	Adenylyl cyclase-associated protein;Adenylyl cyclase-associated protein 1	CAP1	90	89	-1
E7EU96;Q5U5J2;P68400;Q2I0Y7;B2R6D7	Casein kinase II subunit alpha	CSNK2A1	90	89	-1
P36405	ADP-ribosylation factor-like protein 3	ARL3	90	89	-1
A0A0S2Z3G9;O43707;Q96BG6	Alpha-actinin-4	ACTN4	90	89	-1
H0Y9Y3;B9EG60;Q9UMS6	Synaptopodin-2	SYNPO2	90	89	-1
E1NZA1;Q92616;A0A024RBS1	Translational activator GCN1	PRIC295;GCN1L1	90	89	-1
Q32Q10;Q15404;B0YJ73	Ras suppressor protein 1	RSU1	90	89	-1
Q53GX7;P26639;B2RDX5;B4DKZ9;Q5M7Z9;B3KTN2	Threonine--tRNA ligase, cytoplasmic	TARS	90	89	-1
Q8NFV4;D3DXF2	Alpha/beta hydrolase domain-containing protein 11	ABHD11	90	89	-1
Q53HJ0;Q59EL2;P61201;B2R6N0;B4DIH5;H0YKU5	COP9 signalosome complex subunit 2	COPS2	90	89	-1
Q8NFU3;R4GNF9	Thiosulfate sulfurtransferase/rhodanese-like domain-containing protein 1	TSTD1	90	89	-1
Q86U28	Iron-sulfur cluster assembly 2 homolog, mitochondrial	ISCA2	90	89	-1
A0A0S2Z5I7;Q9Y3A5;A0A087X020	Ribosome maturation protein SBDS	SBDS	90	89	-1
B2R4C1;P62899;H7C2W9;C9JU56;B7Z4E3;B7Z4C8;B8ZZK4	60S ribosomal protein L31	RPL31	90	89	-1
B2R6U8;A0A024R6W2;O43809;H3BND3	Cleavage and polyadenylation specificity factor subunit 5	NUDT21	90	89	-1
B2R8A2;A0A024R7M0;Q9BVK6	Transmembrane emp24 domain-containing protein 9	TMED9	90	89	-1
Q9BW92;U3KQG0;Q6ST48;F6S7Q7	Threonine--tRNA ligase, mitochondrial	TARS2	90	89	-1
Q6FGV9;Q15126	Phosphomevalonate kinase	PMVK	90	89	-1
Q5TZZ9;P04083;B5BU38	Annexin;Annexin A1	ANXA1	91	90	-1
Q13033;A0AV58	Striatin-3	STRN3	91	90	-1
A0A140VKF2;O00487;Q53TH1;Q59G89	26S proteasome non-ATPase regulatory subunit 14	PSMD14	91	90	-1
A0A024RDG9;Q9BUT1;A8K5M0;A0A024RDJ8;D6R9U8;D6RIR6;B3KY19	3-hydroxybutyrate dehydrogenase type 2	BDH2	91	90	-1
A0A140VKE9;Q13409;B4DPZ3;Q59GU5;E7EQL5;E7EV09	Cytoplasmic dynein 1 intermediate chain 2	DYNC1I2	91	90	-1
Q9UBW8;Q567U8;F5GYF7;F5H248;F5H7C6	COP9 signalosome complex subunit 7a	COPS7A	91	90	-1
B4DUT7;A0A140VJK6;P49915;Q53F90	GMP synthase [glutamine-hydrolyzing]	GMPS	91	90	-1
Q9UBB4;Q7Z524	Ataxin-10	ATXN10	91	90	-1
A8K5T7;Q9Y2Z0;A8K7W3;B4DYC6	Suppressor of G2 allele of SKP1 homolog	SUGT1	91	90	-1
A0A024R9M9;Q99653;H0YKE7;F5GX29;H0YNG9;B4DSB5	Calcineurin B homologous protein 1	CHP;CHP1	91	90	-1
A0A024R845;P61106;X6RFL8	Ras-related protein Rab-14	RAB14	91	90	-1
P46926;B3KMV2;A8K3S1;D6RFF8;D6R9P4;D6RAY7	Glucosamine-6-phosphate isomerase 1;Glucosamine-6-phosphate isomerase	GNPDA1	91	90	-1
A1L0S7;B7Z6H8		TNS1	91	90	-1
Q02338;E9PCG9;C9K0G7	D-beta-hydroxybutyrate dehydrogenase, mitochondrial	BDH1	91	90	-1
Q6FHX6;P39748;B4DWZ4;I3L3E9	Flap endonuclease 1	FEN1	91	90	-1
Q5JTZ9	Alanine--tRNA ligase, mitochondrial	AARS2	91	90	-1
Q13045;B4DIX0;Q59H95	Protein flightless-1 homolog	FLII	91	90	-1
E9PQY2;Q9NQP4	Prefoldin subunit 4	PFDN4	91	90	-1
Q6IAX5;P60228;B2R806;B3KW56;E5RGA2	Eukaryotic translation initiation factor 3 subunit E	EIF3E	91	90	-1
B3KPZ2;Q9H7Z7;A6NHH0;B4DWP1;X6RJ95	Prostaglandin E synthase 2;Prostaglandin E synthase 2 truncated form	PTGES2	91	90	-1
Q9NZN3	EH domain-containing protein 3	EHD3	91	90	-1
A0A090N7V5;O75223;M0QZK8;B8ZZK2;B3KMN7	Gamma-glutamylcyclotransferase	C7orf24;GGCT	91	90	-1
V9HW48;O75368;D3DTE6	SH3 domain-binding glutamic acid-rich-like protein	HEL-S-115;SH3BGRL	91	90	-1
Q9HBL7	Plasminogen receptor (KT)	PLGRKT	91	90	-1
Q9Y295	Developmentally-regulated GTP-binding protein 1	DRG1	91	90	-1
Q15020;F8VV04;B4DRG9;B4E3R6	Squamous cell carcinoma antigen recognized by T-cells 3	SART3	91	90	-1
X5D2J9;Q499G6;X5D939;X5DNP5;A8K9W7;X5DR09;P78347;B4DH52;B4DRA9	General transcription factor II-I	GTF2I	91	90	-1
B4DP27;Q6FHT8;Q15363;F5GX39;E7EQ72;B4E020	Transmembrane emp24 domain-containing protein 2	RNP24;TMED2	91	90	-1
B4DQI7;A8K4I8;Q9BPW8;H7C2U6;F8WCR5	Protein NipSnap homolog 1	NIPSNAP1	91	90	-1
Q8IUG5;A0A075B6F5;F5GXR6	Unconventional myosin-XVIIIb	MYO18B	92	91	-1
B7Z2Z1;B7ZLP5;A8K329;Q15424;B7Z1C7;B7Z2F6;B7Z5X3;B7Z959	Scaffold attachment factor B1	SAFB	92	91	-1
P46939	Utrophin	UTRN	92	91	-1
Q05639;Q59GP5	Elongation factor 1-alpha 2	EEF1A2	92	91	-1
Q9Y678;Q8WUI6;B3KW21	Coatomer subunit gamma-1	COPG1;COPG	92	91	-1
A0A024RBE7;P42167;G5E972	Lamina-associated polypeptide 2, isoforms beta/gamma;Thymopoietin;Thymopentin	TMPO	92	91	-1
A0A0D9SFB3;A0A0D9SG12;B5BTY4;Q59GX6;A0A0D9SF53;O00571;Q5S4N1;B4DLU5	ATP-dependent RNA helicase DDX3X	DDX3X	92	91	-1
A0A024R637;O60343	TBC1 domain family member 4	TBC1D4	92	91	-1
A8K6U7;Q9BUJ2;A8K3W4;A0A024R0J9;A0A0A0MRA5;B7Z4B8;A8K5K0;M0R3F1;M0QYZ0	Heterogeneous nuclear ribonucleoprotein U-like protein 1	HNRNPUL1;HNRPUL1	92	91	-1
Q59G16;F8VXC8;A0A024RB22;Q8TAQ2;B4DF22	SWI/SNF complex subunit SMARCC2	SMARCC2	92	91	-1
P51858;B2RDE8;A8K8G0;B7Z958;B7Z525	Hepatoma-derived growth factor	HDGF	92	91	-1
Q86U42	Polyadenylate-binding protein 2	PABPN1	92	91	-1
Q9GZT3;A0A087WUN7;H0YJ40;G3V4X6;G3V2S9;H0YJW7	SRA stem-loop-interacting RNA-binding protein, mitochondrial	SLIRP	92	91	-1
A0A024R578;Q13405;H0YDP7;Q59GE9	39S ribosomal protein L49, mitochondrial	MRPL49	92	91	-1
A2VCK8;P62328;Q0P5T0;Q0P5U7;Q0P5Q0;Q0P5P4;Q0P5N8	Thymosin beta-4;Hematopoietic system regulatory peptide	TMSB4X	92	91	-1
A0A024RD82;P22033;T1WHH0;B2R6K1;A0A0S2Z4X4	Methylmalonyl-CoA mutase, mitochondrial	MUT	92	91	-1
B2RBP3;Q8TBC4;J3JZZ9;F8W8D4;B7Z5F6	NEDD8-activating enzyme E1 catalytic subunit	UBA3;UBE1C	92	91	-1
H7BZJ3		PDIA3	92	91	-1
P12081;B4DDD8;B3KWE1;Q52NV4;B4E1C5;E7ETE2;B4DEA2	Histidine--tRNA ligase, cytoplasmic	HARS;HRS	92	91	-1
Q9NQW7;Q5T6H7;B3KSI7	Xaa-Pro aminopeptidase 1	XPNPEP1	92	91	-1
H3BLU7;V9HWA2;O43488	Aflatoxin B1 aldehyde reductase member 2	AKR7A2;HEL-S-166mP	92	91	-1
Q549N0;Q9Y281	Cofilin-2	CFL2	92	91	-1
Q14766;E7EV71;B7ZLY3	Latent-transforming growth factor beta-binding protein 1	LTBP1	92	91	-1
Q9BXP5;H7C3A1	Serrate RNA effector molecule homolog	SRRT	92	91	-1
Q12797	Aspartyl/asparaginyl beta-hydroxylase	ASPH	92	91	-1
Q53FX5;Q9NUP9;G3V1D4	Protein lin-7 homolog C	LIN7C	92	91	-1
P20591;F8W8T1;Q8NAA8	Interferon-induced GTP-binding protein Mx1;Interferon-induced GTP-binding protein Mx1, N-terminally processed	MX1	92	91	-1
A0A024R7S3;P09497	Clathrin light chain B	CLTB	92	91	-1
Q53T76;A0A140VJK2;P43304;A8K1Z2;B7Z601	Glycerol-3-phosphate dehydrogenase;Glycerol-3-phosphate dehydrogenase, mitochondrial	GPD2	92	91	-1
B0QYK0;Q01844;H7BY36;A0A0D9SFL3;C9JGE3	RNA-binding protein EWS	EWSR1	92	91	-1
A0A024RDD3;D6REX3;O94979;A0A024RDH6;D6RHZ5;H7BXG7	Protein transport protein Sec31A	SEC31L1;SEC31A	92	91	-1
Q8N5K1;I3L1N9	CDGSH iron-sulfur domain-containing protein 2	CISD2	92	91	-1
A0A087WXS7;O43681;B4DEE5;K7ERW9	ATPase ASNA1	ASNA1	92	91	-1
Q9BS26	Endoplasmic reticulum resident protein 44	ERP44	92	91	-1
A0A024R994;O75131;Q05DL8;A0A087WYQ3;E5RHZ0	Copine-3	CPNE3	92	91	-1
A0A0U1RRM4;P26599;A6NLN1;A0A0D9SF20	Polypyrimidine tract-binding protein 1	PTBP1	92	91	-1
E5RHG8;A0A024R7Y5;Q15369;R4GMY8	Transcription elongation factor B polypeptide 1	TCEB1	92	91	-1
Q8TBT6;P08574	Cytochrome c1, heme protein, mitochondrial	CYC1	92	91	-1
B4E106			92	91	-1
A0A024R830;A0A140VJL8;P29218;E5RIP7;H0YBL1;E5RG13;E5RI82;E5RGY4	Inositol monophosphatase 1	IMPA1	92	91	-1
A0A024RDY0;O00410;H0Y8C6;B4E0R6;B3KWG6	Importin-5	RANBP5;IPO5	92	91	-1
B7Z3I9;A0A140VJL9;A0A024R877;Q6ZMU0;P13716;B7ZBK6	Delta-aminolevulinic acid dehydratase	ALAD	92	91	-1
Q6FHQ0;Q16576;E9PC52;A8K6A2;Q5JP01	Histone-binding protein RBBP7	RBBP7	92	91	-1
[truncated: 2,270 more rows]
